# Supplementary material for: Asymmetric synthesis of pharmaceutically relevant 1-aryl-2-heteroaryl- and 1,2-diheteroarylcyclopropane-1-carboxylates
Source: Chem Sci. 2021 Jul 27;12(33):11181–90. doi: 10.1039/d1sc02474d (PMC8386643; doi:10.1039/d1sc02474d)
Supplement: SC-012-D1SC02474D-s001 [file SC-012-D1SC02474D-s001.pdf]

# Asymmetric Synthesis of Pharmaceutically Relevant 1-Aryl-2-heteroaryl- and 1,2-Diheteroarylcyclopropane-1-carboxylates.

Jack C. Sharland,<sup>a</sup> Bo Wei,<sup>a</sup> David J. Hardee,<sup>b</sup> Timothy R. Hodges,<sup>b</sup> Wei Gong,<sup>b</sup> Eric A. Voight,<sup>\*b</sup> and Huw M.L. Davies<sup>\*a</sup>

<sup>a</sup>. Department of Chemistry, Emory University, 1515 Dickey Drive, Atlanta GA 30322, United States. \*hmdavie@emory.edu

<sup>b</sup>. Drug Discovery Science and Technology, AbbVie, 1 North Waukegan Rd., North Chicago IL, 60064, United States. \*eric.a.voight@abbvie.com  
For full text See DOI: 10.1039/x0xx00000x

Supporting Information:

## Table of Contents

|                                                                            |           |
|----------------------------------------------------------------------------|-----------|
| 1. General Considerations.....                                             | S1        |
| 2. Preparation of Substrates and Starting Materials.....                   | S2-S11    |
| 3. Procedures for the Cyclopropanation of Aza-heterocyclic Substrates..... | S11-S14   |
| 4. Characterization of Synthesized Compounds.....                          | S14-S38   |
| 5. Determination of enantioselectivity.....                                | S38-S116  |
| 6. NMR Spectra.....                                                        | S117-S197 |
| 7. Crystallographic Data.....                                              | S198-S237 |
| 8. References.....                                                         | S237-S238 |

**CAUTION: Diazo compounds are high energy compounds and need to be treated with respect. Even though we experienced no energetic decomposition in this work, care should be taken in handling large quantities of diazo compounds. Large scale reactions should be conducted behind a blast shield. For a more complete analysis of the risks associated with diazo compounds see the recent review by Bull *et. al.*<sup>1</sup>**

## 1. General Considerations

All experiments were carried out in oven-dried glassware under argon atmosphere unless otherwise stated. Flash column chromatography was performed on silica gel. 4Å molecular sieves were activated under vacuum at 300 °C for 4 h. After time elapsed, the flask was cooled to 60 °C under inert nitrogen atmosphere and stored in a 140 °C oven for future use. All solvents were distilled using a short-path distillation system and stored over 4Å molecular sieves under argon atmosphere. Unless otherwise noted, all other reagents were obtained from commercial sources (Sigma Aldrich, Fisher, TCI Chemicals, AK Scientific, Combi Blocks, Oakwood Chemicals) and used as received without purification. <sup>1</sup>H, <sup>13</sup>C, and <sup>19</sup>F NMR spectra were recorded at either 400 MHz (<sup>13</sup>C at 100 MHz) on Bruker 400 spectrometer or 600 MHz (<sup>13</sup>C at 151 MHz) on INOVA 600 or Bruker 600 spectrometer. NMR spectra were run in solutions of deuterated chloroform (CDCl<sub>3</sub>) with residual chloroform taken as an internal standard (7.26 ppm for <sup>1</sup>H, and 77.16 ppm for <sup>13</sup>C), and were reported in parts per million (ppm). The abbreviations for multiplicity are as follows: s = singlet, d = doublet, t = triplet, q = quartet, p = pentet, m = multiplet, dd = doublet of doublet, etc. Coupling constants (J values) are obtained from the spectra. Thin layer chromatography was performed on aluminum-back silica gel plates with UV light and cerium aluminum molybdate (CAM) or permanganate (KMnO<sub>4</sub>) stain to visualize. Mass spectra were taken on a Thermo Finnigan LTQ-FTMS spectrometer with APCI, ESI or NSI. Melting points (mp) were measured in open capillary tubes with a Mel-Temp Electrothermal melting points apparatus and are uncorrected. IR spectra were collected on a Nicolet iS10 FT-IR spectrometer from Thermo Scientific and reported in unit of cm<sup>-1</sup>. Enantiomeric excess (% ee) data were obtained on a Varian Prostar chiral HPLC instrument, an Agilent 1100 HPLC, or an Agilent 1290 Infinity UHPLC, eluting the purified products using a mixed solution of HPLC-grade 2-propanol (*i*-PrOH) and *n*-hexane.

## Experimental Procedures

### 2. Preparation of Substrates:

#### 2.1 Preparation of known substrates.

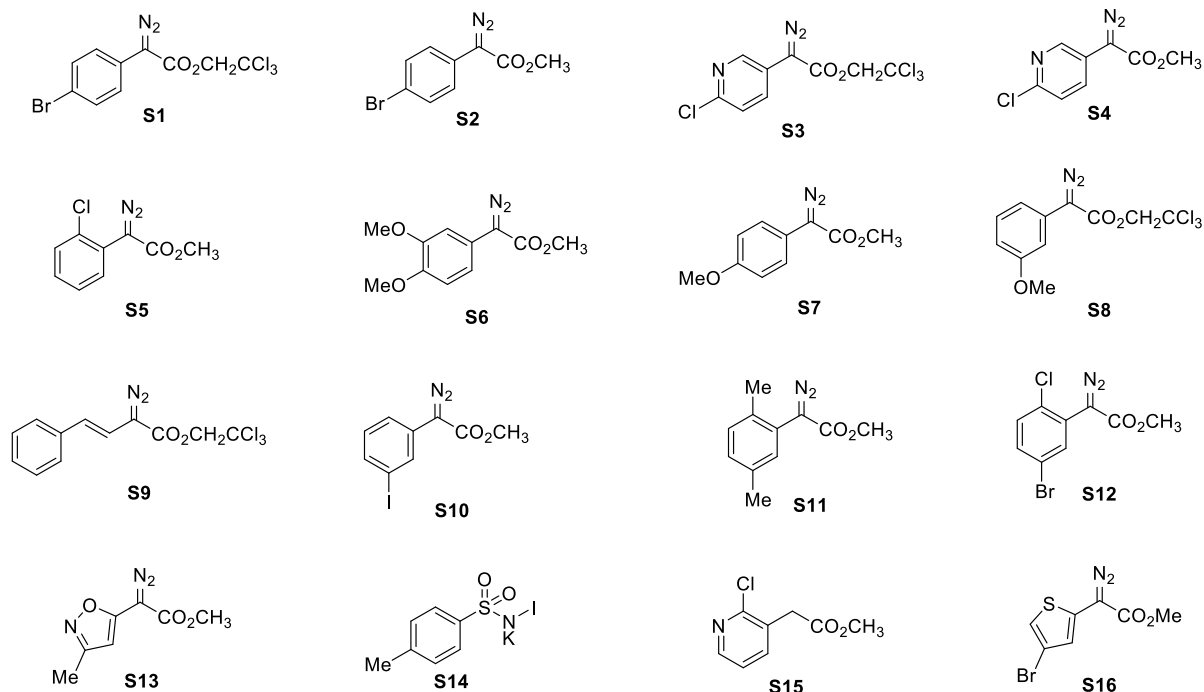

**Figure S1: Known substrate starting materials**

Diazo compounds **S1-4** were prepared according to the established literature and matched the reported spectra.<sup>2</sup>  
Diazo compounds **S5-7**, were prepared according to the established literature and matched the reported spectra.<sup>3</sup>  
Diazo compounds **S8-9** were prepared according to the established literature and matched the reported spectra.<sup>4</sup>  
Diazo compound **S10** was prepared according to the established literature and matched the reported spectra.<sup>5</sup>  
Diazo compound **S11** was prepared according to the established literature and matched the reported spectra.<sup>6</sup>  
Diazo compound **S12** was prepared according to the established literature and matched the reported spectra.<sup>7</sup>  
Diazo compound **S13** was prepared according to the established literature and matched the reported spectra.<sup>8</sup>  
Compound **S14** matched the spectra reported in the literature.<sup>9</sup>  
Compound **S15** matched the spectra reported in the literature.<sup>10</sup>  
Compound **S16** matched the spectra reported in the literature.<sup>11</sup>

#### 2.2 Preparation of novel substrates:

##### 2.2.1 Preparation of (*R*)-4,4-dimethyl-2-oxotetrahydrofuran-3-yl 2-(4-bromophenyl)-2-diazoacetate (**S17**).

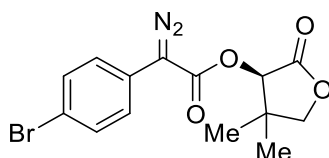

### 2.2.1.1 Esterification towards (R)-4,4-dimethyl-2-oxotetrahydrofuran-3-yl 2-(4-bromophenyl)acetate.

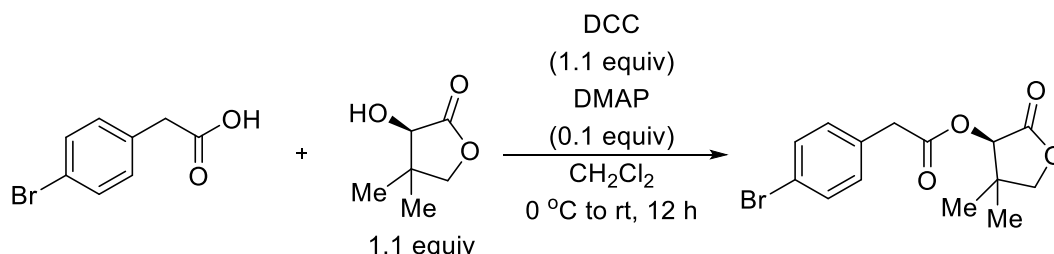

4-Bromophenylacetic acid (5.00 g, 23.3 mmol), *N,N*-dimethyl 4-aminopyridine (DMAP, 0.1 equiv, 284mg, 2.33 mmol), and (R)-3-hydroxy-4,4-dimethyl-2-oxotetrahydrofuran-2(3H)-one (*R*-pantolactone, 1.1 equiv, 3.33g, 25.6mmol) were added to a flame-dried round bottom flask. The reagents were dissolved in 100 mL CH<sub>2</sub>Cl<sub>2</sub> (DCM) and the solution was cooled to 0 °C. A solution of *N,N'*-dicyclohexylcarbodiimide (DCC, 1.1 equiv, 5.28g, 25.6mmol) in CH<sub>2</sub>Cl<sub>2</sub> (30 mL) was added to the reaction mixture via syringe over 5 minutes (min). The reaction mixture was removed from the ice bath allowed to stir overnight at room temperature. The reaction mixture was filtered by vacuum filtration over a pad of celite and washed with diethyl ether (Et<sub>2</sub>O, 100 mL). The filtrate was concentrated and purified by flash column chromatography (0-5% EtOAc/hexanes over 30CV on isolera) to give pure (R)-4,4-dimethyl-2-oxotetrahydrofuran-3-yl 2-(4-bromophenyl)acetate as off-white needlelike crystals (70% yield, 5.3 g, 16 mmol) after aggregation and evaporation of appropriate fractions.

### 2.2.1.2 Diazo transfer to form (R)-4,4-dimethyl-2-oxotetrahydrofuran-3-yl 2-(4-bromophenyl)-2-diazoacetate.

(R)-4,4-dimethyl-2-oxotetrahydrofuran-3-yl 2-(4-bromophenyl)acetate (2.00 g, 6.11 mmol) and 4-acetamidobenzenesulfonyl azide (*p*-ABSA, 1.3 equiv, 1.91 g, 7.95 mmol) were added to a flame-dried round bottom flask and dissolved in acetonitrile (MeCN, 50mL) at 0 °C in an ice-bath. 1,8-diazabicyclo[5.4.0]undec-7-ene (DBU, 1.0 equiv, 0.921 mL) was added dropwise to the cooled stirring solution causing it to change from a clear-colorless solution to a deep orange solution. The reaction was left to stir overnight before quenching with saturated ammonium chloride solution (NH<sub>4</sub>Cl in H<sub>2</sub>O, 50mL). The aqueous and organic layers were separated, and the aqueous layer was extracted with Et<sub>2</sub>O (2 X 25 mL). The combined organic layers were dried over anhydrous sodium sulfate (Na<sub>2</sub>SO<sub>4</sub>) before loading onto silica. The diazo -impregnated silica was then purified by flash column chromatography (100 g silica cartridge, 0% EtOAc/hexanes 3 CV, 0-20% EtOAc/hexanes for 30 CV, 20% EtOAc/hexanes for 5 CV) to afford (R)-4,4-dimethyl-2-oxotetrahydrofuran-3-yl 2-(4-bromophenyl)-2-diazoacetate as a powdery bright orange solid (**S17**, 60% yield, 1.30 g, 3.68 mmol) after aggregation and evaporation of appropriate fractions.

### 2.2.2 Preparation of (R)-4,4-dimethyl-2-oxotetrahydrofuran-3-yl 2-diazo-2-(2-methoxy-5-methylphenyl)acetate (**S18**)

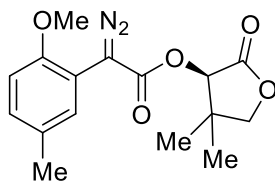

#### 2.2.2.1 Friedel-Crafts acylation towards methyl 2-(2-methoxy-5-methylphenyl)-2-oxoacetate.

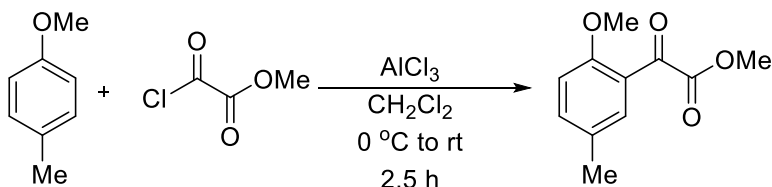

A solution of 1-methoxy-4-methylbenzene (1.0 equiv, 10.0 g, 10.3 mL, 81.9 mmol) and methyl 2-chloro-2-oxoacetate (1.5 equiv, 15.0 g, 11.3 mL, 122.8 mmol) in CH<sub>2</sub>Cl<sub>2</sub> (50 mL) was added dropwise to a stirred suspension of aluminium chloride (AlCl<sub>3</sub>, 1.0 equiv, 10.9 g, 81.85 mmol) in CH<sub>2</sub>Cl<sub>2</sub> (150 mL) in a flame-dried round-bottom flask under an inert nitrogen atmosphere. The temperature maintained below 5 °C throughout addition. When the addition was complete, the deep purple mixture was stirred at 25 °C for 2.5 h and then poured onto 100 g of ice. The aqueous layer was washed once with CH<sub>2</sub>Cl<sub>2</sub> (100 mL). The combined organic extracts were washed with 3 M HCl (200 mL), 1 M HCl (200 mL), DI water (200 mL), and

saturated NaCl (200 mL). Then the organic layer was filtered over a plug of basic alumina (25 g) and dried over sodium sulfate (Na<sub>2</sub>SO<sub>4</sub>) then organic solvent was concentrated to yield a yellow liquid. The crude product was then purified by flash chromatography (0-5% Et<sub>2</sub>O/hexane over 25 CV) and the major peak containing fractions were aggregated and evaporated to yield the title product as a light yellow oil (93% yield, 15.9 g, 76.4 mmol).

#### 2.2.2.2 Hydrolysis to afford 2-(2-methoxy-5-methylphenyl)-2-oxoacetic acid

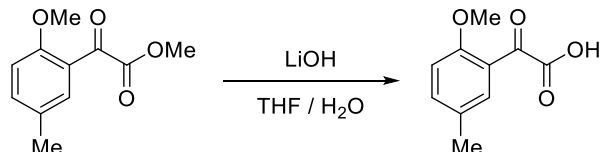

Lithium hydroxide (1.06 g, 44.3 mmol) was added to a solution of methyl 2-(2-methoxy-5-methylphenyl)-2-oxoacetate (4.61 g, 22.1 mmol) in tetrahydrofuran (30 mL) and water (15 mL) at room temperature. After stirring for 2 h the reaction was acidified with 1M HCl and extracted with EtOAc. The organic phase was washed with brine, dried with MgSO<sub>4</sub>, filtered, and concentrated under reduced pressure to give the title compound (4.03 g, 20.8 mmol, 94% yield) as a gray solid without further purification. <sup>1</sup>H NMR (600 MHz, DMSO-d<sub>6</sub>) δ 7.55 – 7.48 (m, 2H), 7.15 (d, J = 8.5 Hz, 1H), 3.81 (s, 3H), 2.29 (t, J = 0.7 Hz, 3H); MS(APCI<sup>+</sup>) m/z 195.6 (M+H)<sup>+</sup>. The material was used in the next step without further characterization.

#### 2.2.2.3 Esterification towards (R)-4,4-dimethyl-2-oxotetrahydrofuran-3-yl 2-(2-methoxy-5-methylphenyl)-2-oxoacetate.

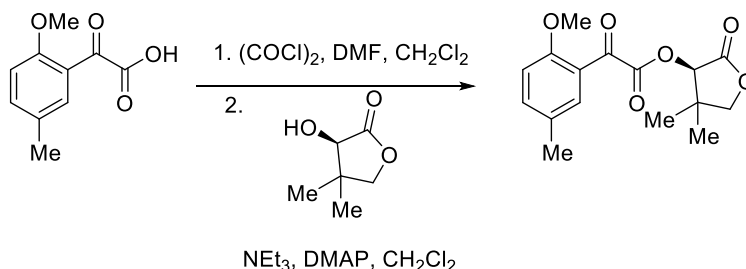

Oxalyl chloride (8.66 mL, 99 mmol) was added dropwise to a mixture of 2-(2-methoxy-5-methylphenyl)-2-oxoacetic acid (9.6 g, 49.4 mmol) and DMF (0.038 mL, 0.494 mmol) in CH<sub>2</sub>Cl<sub>2</sub> (100 mL) at 0 °C. The reaction was slowly warmed to room temperature and stirred for 16 h before being concentrated under reduced pressure. The resulting residue was then taken up in CH<sub>2</sub>Cl<sub>2</sub> (100 mL) and cooled in an ice bath. Triethylamine (TEA, 17.23 mL, 124 mmol), DMAP (0.060 g, 0.494 mmol), and *R*-pantolactone (9.65 g, 74.2 mmol, CombiBlocks) were then sequentially added before warming the mixture to room temperature. After stirring for 2 h the reaction was washed with 1M HCl, saturated NaHCO<sub>3</sub>, and brine. The organic phase was then dried with MgSO<sub>4</sub>, filtered, and concentrated under reduced pressure. The crude residue was purified by flash chromatography (ISCO Combiflash, 0-50% EtOAc/heptanes, 120 g Redisepp gold silica column) to give the title compound (13.8 g, 45.1 mmol, 91% yield) as a light yellow oil after aggregation and evaporation of appropriate fractions. <sup>1</sup>H NMR (500 MHz, DMSO-d<sub>6</sub>) δ 7.62 – 7.55 (m, 2H), 7.19 (d, J = 8.5 Hz, 1H), 5.82 (s, 1H), 4.22 – 4.17 (m, 1H), 4.12 (d, J = 8.6 Hz, 1H), 3.84 (s, 3H), 2.31 (d, J = 0.8 Hz, 3H), 1.21 (s, 3H), 0.99 (s, 3H); MS(APCI<sup>+</sup>) m/z 307.3 (M+H)<sup>+</sup>. The material was used in the next step without further characterization.

#### 2.2.2.4 One-pot diazotization of (R)-4,4-dimethyl-2-oxotetrahydrofuran-3-yl 2-(2-methoxy-5-methylphenyl)-2-oxoacetate.

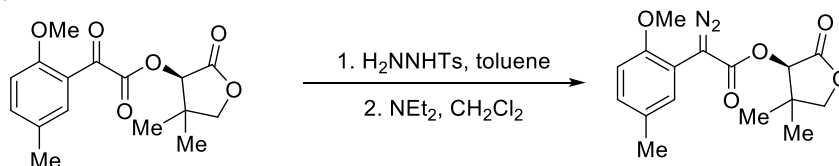

A mixture of (R)-4,4-dimethyl-2-oxotetrahydrofuran-3-yl 2-(2-methoxy-5-methylphenyl)-2-oxoacetate (8.53 g, 27.8 mmol) and 4-methylbenzenesulfonylhydrazide (5.19 g, 27.8 mmol, Aldrich) in toluene (56 mL) was heated to reflux with a Dean-Stark trap. After 16 h the reaction was concentrated under reduced pressure and CH<sub>2</sub>Cl<sub>2</sub> (56 mL) and TEA (5.82 mL, 41.8 mmol) were added to the resulting residue. After stirring at room temperature for 16 h the reaction was washed with saturated NaHCO<sub>3</sub> and brine, dried with MgSO<sub>4</sub>, filtered, and concentrated under reduced pressure. The crude residue was purified by flash chromatography (ISCO Combiflash, 0-40% EtOAc/heptanes, 120 g Redisepp gold silica column) to yield (R)-4,4-dimethyl-2-oxotetrahydrofuran-3-yl 2-diazo-2-(2-methoxy-5-methylphenyl)acetate (**S18**, 7.3 g, 23 mmol, 82% yield) as a yellow solid after aggregation and evaporation of appropriate fractions.

## 2.2.3 Preparation of methyl 2-diazo-2-(2-methoxy-5-methylphenyl)acetate (S19).

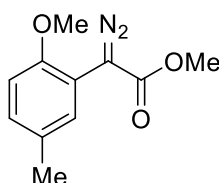

### 2.2.3.1 Hydrazine condensation towards methyl (*E/Z*)-2-hydrazineylidene-2-(2-methoxy-5-methylphenyl) acetate.

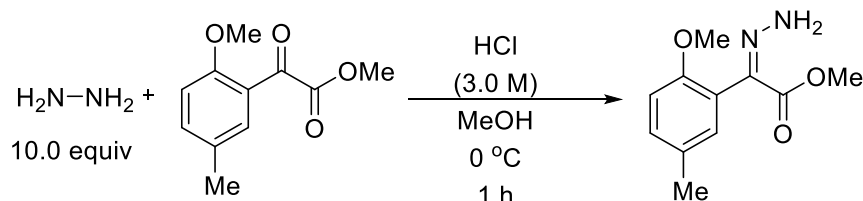

Hydrazine hydrate (50 wt% in H<sub>2</sub>O, 10.0 equiv, 24 mL, 384 mmol) was dissolved in methanol (100 mL) in a round-bottom flask and placed into an ice bath. 3M HCl (9.0 equiv, 120 mL, 346 mmol) was added dropwise to the stirring cold solution. After the addition was complete, methyl 2-(2'-methoxy-5'-methylphenyl)-2-oxoacetate (1.0 equiv, 8.00 g, 38.4 mmol) dissolved in methanol (30 mL) was added dropwise to the stirring solution. The solution was left to stir for 1.5 h. Reaction completion was determined by the presence of only two CAM stain active spots on TLC. If the reaction is left to run too long, a yellow precipitate is generated, possibly the azine dimer. This byproduct has the same *rf* as the starting material by TLC and thus disappearance of the starting material cannot be used to determine reaction completion. The reaction was quenched with a saturated sodium bicarbonate (NaHCO<sub>3</sub>) solution (150 mL) and left to stir and quench overnight. The reaction mixture was concentrated via rotovap to remove methanol. The solution was then extracted with EtOAc (2 X 100 mL) and the organic layer was washed with DI H<sub>2</sub>O (100 mL) and saturated NaCl solution (100 mL) before drying over Na<sub>2</sub>SO<sub>4</sub> and concentrating in vacuo. Hydrazone was purified by flash column chromatography (0-25% EtOAc/hex over 8 CV, 25% EtOAc/hex for 6 CV, 25-45% EtOAc/hexanes over 6 CV, 45% EtOAc/hex for 10 CV, then 65% EtOAc/hex- 85% EtOAc/Hex for 10 CV). Both the *E* and *Z* isomers of the hydrazone product were isolated as separate peaks CAM active peaks and combined. The *E* and *Z* isomers may be isolated separately as white powders in their pure form, either isomer or a mixture of the two is suitable for the subsequent diazotization. Product containing fractions were concentrated to afford the title compound as a clear colorless oil (89% yield, 7.56 g, 34 mmol).

### 2.2.3.2 Iodamine-T (TsNIK) oxidation of methyl (*E/Z*)-2-hydrazineylidene-2-(2-methoxy-5-methylphenyl)acetate.

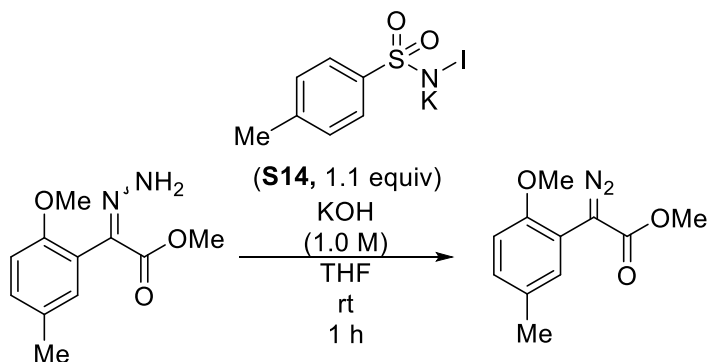

Mixture of *E* and *Z* isomers

Iodamine-T (TsNIK, **S14**, 1.1 equiv, 5.19 g, 15.47 mmol) was suspended in a solution of methyl (*E/Z*)-2-hydrazineylidene-2-(2-methoxy-5-methylphenyl)acetate (1.0 equiv, 3.13 g, 14.06 mmol) in THF (20 mL). Aqueous 1.0 M KOH (1.1 equiv, 15 mL, 15.47 mmol) was slowly added to the suspension, causing the solution to change in coloration from yellow to deep red. After stirring for 1 h at room temperature, the reaction solution was poured into aqueous KOH (1.0 M, 20 mL) and extracted with Et<sub>2</sub>O (2 X 20 mL). The organic layer was washed with KOH (1.0 M, 20 mL), DI H<sub>2</sub>O (20 mL) and saturated NaCl solution (40 mL) before being dried over Na<sub>2</sub>SO<sub>4</sub>. The organic layer was concentrated via rotovap and purified by flash column

chromatography (1% EtOAc/hexanes over 24 CV) to afford methyl 2-diazo-2-(2-methoxy-5-methylphenyl)acetate (**S19**) as a bright orange, crystalline powder (80% yield, 2.5 g, 11.3 mmol) after aggregation and evaporation of appropriate fractions..

## 2.2.4 Synthesis of methyl 2-(2-chloropyridin-3-yl)-2-diazoacetate (**S20**).

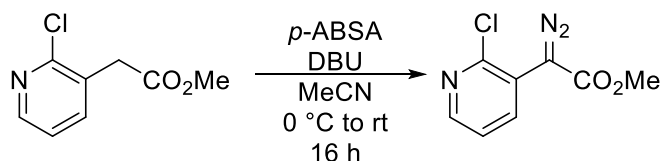

Methyl 2-(2-chloropyridin-3-yl)acetate (**S15**, 1.0 equiv, 5.39 g, 29.1 mmol) and *p*-ABSA (1.2 equiv, 8.38 g, 34.9 mmol) were added to a flame-dried 250 mL round-bottom flask under an inert nitrogen atmosphere. They were dissolved in dry acetonitrile (MeCN, 150 mL) and cooled to 0 °C in an ice-bath. Then DBU (1.2 equiv, 5.31 g, 5.20 mL, 10.9 mmol) was added dropwise to the stirring solution which slowly became deep yellow. The reaction was allowed to warm to room temperature over 18 h. Reaction was then quenched with saturated NH<sub>4</sub>Cl (100 mL) and the organic layer was separated. The aqueous layer was extracted with CH<sub>2</sub>Cl<sub>2</sub> (2 X 50 mL) and organic extracts were combined, dried over Na<sub>2</sub>SO<sub>4</sub>, and dry-loaded onto silica (5 g). The product was then purified by flash column chromatography (0-50% EtOAc/hexanes). Yellow fractions were combined and evaporated to yield methyl 2-(2-chloropyridin-3-yl)-2-diazoacetate (**S20**) as a bright yellow fluffy solid (96% yield, 5.9 g, 27.9 mmol).

## 2.2.5 Synthesis of methyl 2-diazo-2-(2-ethoxy-5-methylphenyl)acetate (**S21**).

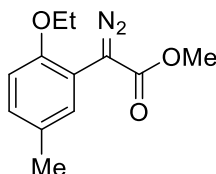

### 2.2.5.1 Friedel-Crafts acylation towards methyl 2-(2-ethoxy-5-methylphenyl)-2-oxoacetate.

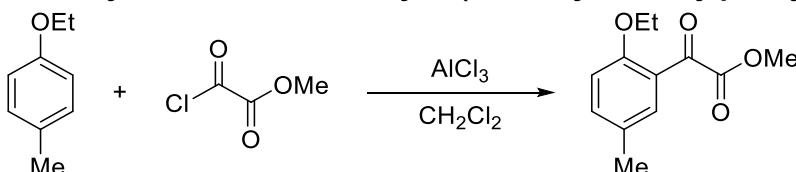

1-Ethoxy-4-methylbenzene (1.35 mL, 9.6 mmol) was added dropwise to a suspension of AlCl<sub>3</sub> (1.60 g, 12.0 mmol) in CH<sub>2</sub>Cl<sub>2</sub> (38.5 mL) at 0 °C. After 5 min, methyl 2-chloro-2-oxoacetate (1.106 mL, 12.02 mmol, Aldrich) was added dropwise and the reaction was warmed to room temperature. After stirring for 16 h the reaction was poured into 250 mL of 1M HCl and extracted with CH<sub>2</sub>Cl<sub>2</sub>. The organic phase was washed with 1M HCl and brine, dried with MgSO<sub>4</sub> and concentrated under reduced pressure. The crude residue was then purified by flash chromatography (ISCO Combiflash, 0-30% EtOAc/heptanes, 80 g Redisepp gold silica column) to yield the title compound (1.42 g, 6.39 mmol, 66.4 % yield) as a light yellow oil after aggregation and evaporation of appropriate fractions. <sup>1</sup>H NMR (400 MHz, CDCl<sub>3</sub>) δ 7.68 (dd, *J* = 2.4, 1.0 Hz, 1H), 7.40 7.30 (m, 1H), 6.86 (d, *J* = 8.5 Hz, 1H), 4.07 (q, *J* = 7.0 Hz, 2H), 3.91 (s, 3H), 2.32 (d, *J* = 0.7 Hz, 3H), 1.39 (t, *J* = 7.0 Hz, 3H); MS(APCI+) *m/z* 223.4 (M+H)<sup>+</sup>. The material was used in the next step without further characterization.

### 2.2.5.2 One-pot diazotization of (methyl 2-(2-ethoxy-5-methylphenyl)-2-oxoacetate.

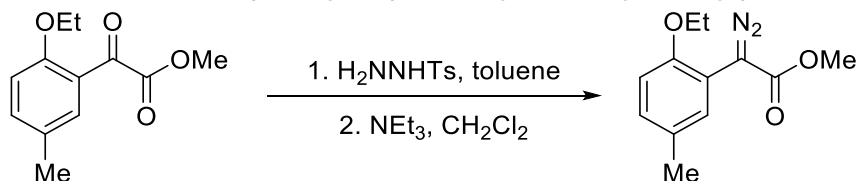

A mixture of methyl 2-(2-ethoxy-5-methylphenyl)-2-oxoacetate (1.29 g, 5.80 mmol) and 4-methylbenzenesulfonylhydrazide (1.08 g, 5.80 mmol) in toluene (14.5 mL) was heated at reflux with a Dean-Stark trap for 16 h. The reaction was then concentrated under reduced pressure and the resulting residue was taken up in CH<sub>2</sub>Cl<sub>2</sub> (14.5 mL) and cooled in an ice bath. TEA (1.214 mL, 8.71 mmol) was added in one portion and after 5 min the reaction was warmed to room temperature. After stirring for 16 h the reaction was washed with sat. NaHCO<sub>3</sub> dried with MgSO<sub>4</sub>, and concentrated under reduced pressure. The crude residue was then purified by flash chromatography (ISCO Combiflash, 0-20% EtOAc/heptanes, 40 g Redisepp gold silica column) to yield the title compound (**S21**, 1.08 g, 4.61 mmol, 79 % yield) as an orange oil that crystallized upon standing after aggregation and evaporation of appropriate fractions..

## 2.2.6 Synthesis of methyl 2-diazo-2-(2-fluoro-5-methylphenyl)acetate (S22).

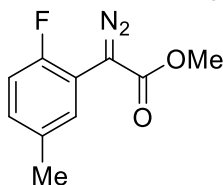

### 2.2.6.1 Synthesis of methyl 2-(2-fluoro-5-methylphenyl)-2-oxoacetate

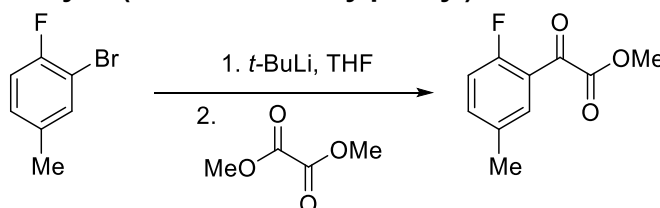

*tert*-Butyllithium (*t*-BuLi, 13.4 mL, 22.8 mmol, 1.7 M in pentane) was added dropwise to a solution of 2-bromo-1-fluoro-4-methylbenzene (1.43 mL, 11.4 mmol, Aldrich) in THF (57 mL) at -78 °C. After 20 min a solution of dimethyl oxalate (2.69 g, 22.75 mmol, Aldrich) in THF (3 mL) was added in one portion and the reaction was warmed to 0 °C. After stirring for 16 h the reaction was quenched with DI H<sub>2</sub>O and extracted with EtOAc. The organic phase was washed with brine, dried with Na<sub>2</sub>SO<sub>4</sub>, filtered, and concentrated under reduced pressure. The crude material was purified by flash chromatography (ISCO Combiflash, 0-50% EtOAc/heptanes, 40 g Redisep gold silica column) to give the title compound (1.21 g, 6.17 mmol, 54.2 % yield) as a yellow oil after aggregation and evaporation of appropriate fractions. <sup>1</sup>H NMR (600 MHz, CDCl<sub>3</sub>) δ 7.70 (ddd, J = 6.7, 2.4, 0.9 Hz, 1H), 7.43 (dddd, J = 8.5, 5.0, 2.4, 0.7 Hz, 1H), 7.05 (dd, J = 10.5, 8.5 Hz, 1H), 3.96 (s, 3H), 2.42 – 2.33 (m, 3H); MS(APCI+) *m/z* 197.5 (M+H)<sup>+</sup>. The material was used in the next step without further characterization.

### 2.2.6.2 Diazotization of methyl 2-(2-fluoro-5-methylphenyl)-2-oxoacetate.

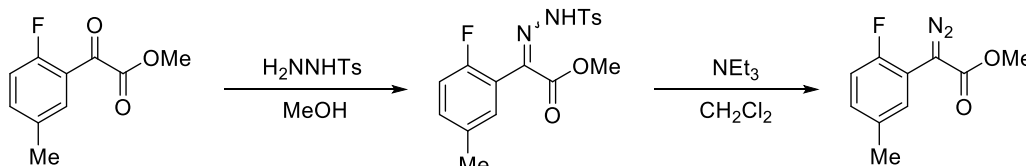

Methyl 2-(2-fluoro-5-methylphenyl)-2-oxoacetate (1.28 g, 6.52 mmol) was added to a slurry of 4-methylbenzenesulfonylhydrazide (1.28 g, 6.85 mmol) in methanol (6 mL) at room temperature to give a yellow solution. After stirring for 16 h at room temperature a white precipitate formed that was collected by filtration and washed with methyl-*tert*-butyl ether (MTBE) to give 819 mg of intermediate hydrazone. The mother liquor was concentrated under reduced pressure and the resulting solid was triturated with MTBE to yield an additional 700 mg of hydrazone as a white solid. This material was used directly in the next step without further purification. CH<sub>2</sub>Cl<sub>2</sub> (10 mL) and TEA (0.627 mL, 4.50 mmol) were added to the first 819 mg batch of white solid. After stirring at room temperature for 16 h the reaction was concentrated under reduced pressure. The crude material was purified by flash chromatography (ISCO Combiflash, 0-20% EtOAc / heptanes, 24 g Redisep gold silica column) to yield the title compound as a yellow solid (S22, 406 mg, 1.950 mmol, 87 % yield) after aggregation and evaporation of appropriate fractions.

## 2.2.7 Synthesis of methyl 2-diazo-2-(2-fluoro-5-methoxyphenyl)acetate (S23).

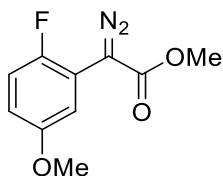

### 2.2.7.1 Esterification of methyl 2-(2-fluoro-5-methoxyphenyl)acetate

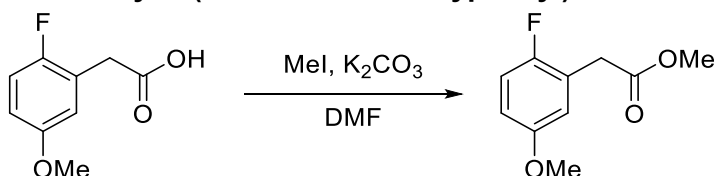

Methyl iodide (0.82 mL, 13.0 mmol) was added to a mixture of 2-(2-fluoro-5-methoxyphenyl)acetic acid (2 g, 10.86 mmol, Astatech) and potassium carbonate ( $K_2CO_3$ , 1.95 g, 14.1 mmol) in DMF (11 mL) at room temperature. After stirring for 16 h the reaction was diluted with EtOAc and washed twice with DI  $H_2O$  and once with saturated NaCl solution. The organic phase was dried with  $MgSO_4$  filtered, and concentrated under reduced pressure to give methyl 2-(2-fluoro-5-methoxyphenyl)acetate (1.66 g, 8.38 mmol, 77 % yield) as a light yellow oil without further purification.  $^1H$  NMR (500 MHz,  $CDCl_3$ )  $\delta$  7.01 – 6.95 (m, 1H), 6.80 – 6.74 (m, 2H), 3.77 (s, 3H), 3.71 (s, 3H), 3.64 (d,  $J$  = 1.3 Hz, 2H). The material was used in the next step without further characterization.

### 2.2.7.2 Diazo transfer to form methyl 2-diazo-2-(2-fluoro-5-methoxyphenyl)acetate.

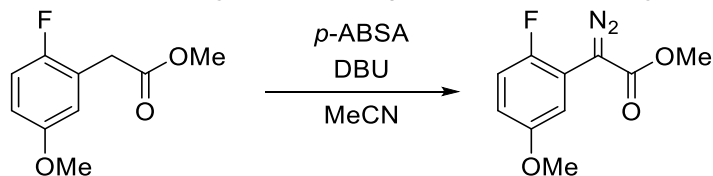

DBU (1.27 mL, 8.40 mmol) was added to a solution of methyl 2-(2-fluoro-5-methoxyphenyl)acetate (1.19 g, 6.00 mmol) and  $p$ -ABSA (1.73 g, 7.20 mmol, Aldrich) in MeCN (18 mL) at room temperature. After stirring for 16 h the reaction was diluted with EtOAc and washed twice with DI  $H_2O$  and once with brine. The organic phase was dried with  $MgSO_4$ , filtered, and concentrated under reduced pressure. The crude residue was purified by flash column chromatography (ISCO Combiflash, 0-40% EtOAc / heptanes, 40 g Redisep gold silica column) to yield the title compound (**S23**, 977 mg, 4.36 mmol, 72.6 % yield) after evaporation of appropriate fractions as a bright yellow solid.

### 2.2.9 Synthesis of substituted vinyl-heterocycles

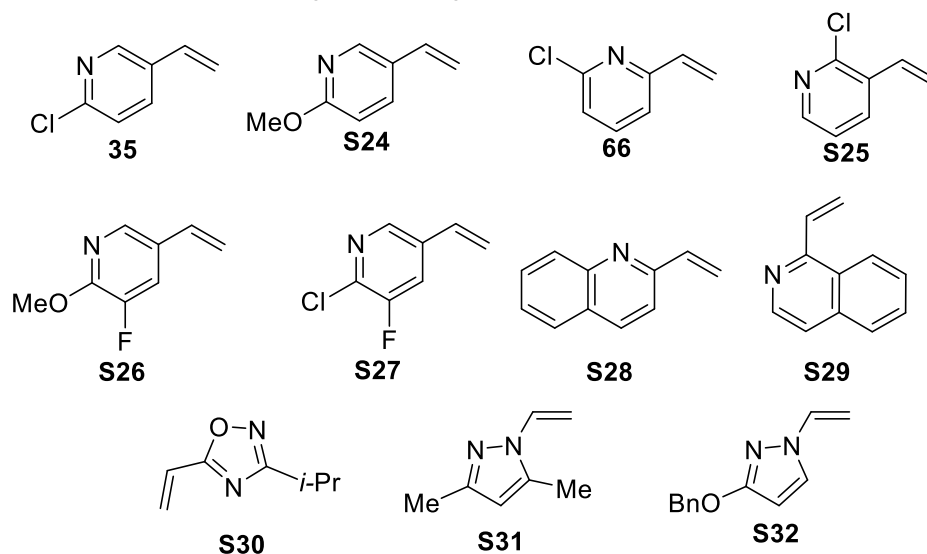

**Figure S2:** Vinyl-heteroaryl substrates for cyclopropanation of aza-heterocycles. Compounds **35**, **66**, **S24-S25** were synthesized using general procedure A. Compounds **S26-S29** were synthesized using general procedure B. Compounds **S30-S32** were synthesized according to alternative procedures.

#### 2.2.8.1 General procedure A, Wittig olefination of pyridyl-aldehydes.

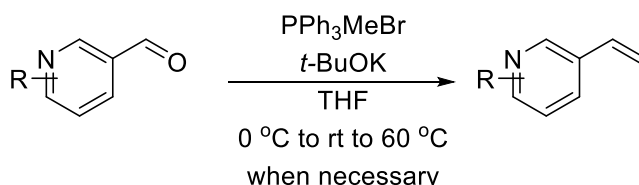

Reaction may be conducted on large scale, up to 140 mmol, although slightly lower yields may be observed. To 0 °C, stirred slurry of methyltriphenylphosphonium bromide (1.2 equiv) under an inert nitrogen atmosphere in tetrahydrofuran (150 mL) was added potassium *tert*-butoxide dissolved in 30 mL THF ( $t$ -BuOK, 1.2 equiv) portionwise over a 5 minute period to produce a yellow ylide slurry. After 30 min, pyridyl aldehyde (1.0 equiv) was added slowly to produce a colored slurry (color ranges from brown to blue depending on pyridyl substitution). TLC was conducted every hour to monitor reaction progress (5% EtOAc in hexanes) warming to rt or heating to 60 °C if reaction was incomplete after 2 h. After the reaction had stopped the reaction mixture was treated with saturated aqueous ammonium chloride (160 mL) and a majority of the THF was

removed in vacuo (concentrated via rotovap). The resulting mixture (often a brown liquid) was washed with ethyl acetate, the combined organic layers washed with saturated aqueous brine and stirred over activated charcoal for 1hr to remove colored impurities. The mixture was then filtered over Celite, dried over Na<sub>2</sub>SO<sub>4</sub> and concentrated in vacuo. The resulting semi-solid/oil was stirred overnight in pentanes (150 mL) to precipitate phosphine byproduct. Then the solution was filtered through a silica plug (~50 g) and the solids washed with an additional portion of 2:1 Et<sub>2</sub>O/pentane (500 mL) until olefin spots (as confirmed by TLC (5% EtOAc/hexanes) developed with permanganate stain) no longer eluted from the plug. The combined filtrates were concentrated in vacuo and purified by flash column chromatography (0-5% Et<sub>2</sub>O/hexanes over 40 CV) and product containing fractions were combined and evaporated to afford the vinyl-pyridine as a colorless or yellow oil (40-65% yield). Products **35**, **66**, **S24**, and **S25** were synthesized via this method.

### 2.2.8.2 General procedure B, Suzuki-coupling towards vinyl-heterocycles.

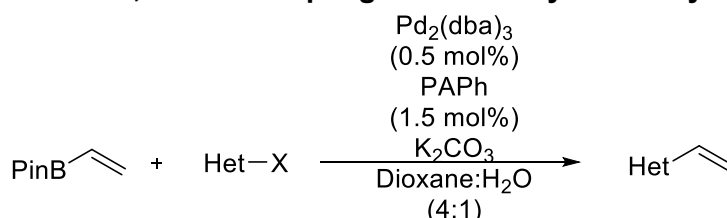

Reaction may be run on a variety of scales and is effective for heteroaryl iodides, bromides, and chlorides although higher catalyst and ligand loading (2 mol % Pd/ 5 mol % PAPh) was most effective for heteroaryl-chlorides. Heteroaryl-halide (1.0 equiv), 1,3,5,7-tetramethyl-6-phenyl-2,4,8-trioxo-6-phosphaadamantane (PAPh, 1.5 mol %), and potassium carbonate (K<sub>2</sub>CO<sub>3</sub>, 2.5 equiv) were combined in a round-bottom flask containing a stir bar and charged with a dioxane:water (4:1 v:v) solution. The mixture was sparged with nitrogen for 10 min before adding tris(dibenzylideneacetone)dipalladium(0) (Pd<sub>2</sub>(dba)<sub>3</sub>, 0.5 mol %). After the solution had turned a deep red color, neat vinylboronic acid pinacol ester (1.5 equiv) was added dropwise. The reaction mixture was then heated overnight at 80 °C. Disappearance of starting heteroaryl-halide was monitored by TLC (1% EtOAc/hexanes) to determine reaction completion. The reaction mixture was decanted into a separatory funnel and DI water (20 mL) was added. The aqueous mixture was extracted with Et<sub>2</sub>O (2 X 20 mL). Organic extracts were combined and washed with DI H<sub>2</sub>O (1x 50 mL) and saturated NaCl solution (1x 50 mL). The organic layer was then filtered over celite and dried over Na<sub>2</sub>SO<sub>4</sub> before concentrating in vacuo. The material was then purified via flash column chromatography (0-2% EtOAc / hexanes, 18 CV) and the pure product fractions (identified by permanganate stain) were combined to afford the desired vinyl-heterocycle (**S26-S29**, 47-96% yield).

### 2.2.9 Synthesis of 3-isopropyl-5-vinyl-1,2,4-oxadiazole (S30)

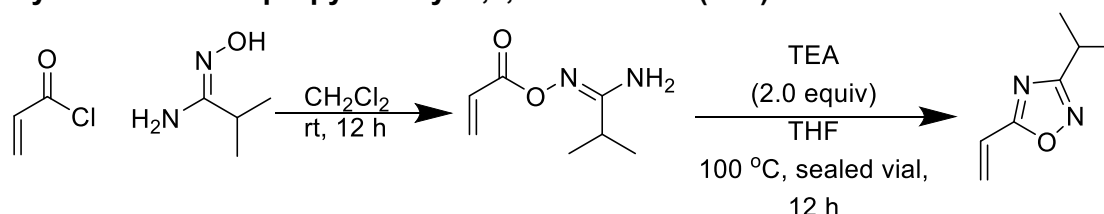

Acryloyl chloride (1.20 equiv, 1.06 g, 11.7 mmol) was added slowly to a solution of (*E*)-*N'*-hydroxyisobutyrimidamide (1.00 g, 9.79 mmol) in CH<sub>2</sub>Cl<sub>2</sub> (8 mL) at rt. After 12 hr, the reaction mixture was neutralized using sat. NaHCO<sub>3</sub>, extracted 3 X using CH<sub>2</sub>Cl<sub>2</sub>, dried over anhydrous Na<sub>2</sub>SO<sub>4</sub>, and concentrated to afford crude (*E*)-*N'*-(acryloyloxy)isobutyrimidamide (1.53 g, 9.78 mmol) as a white solid. Crude (*E*)-*N'*-(acryloyloxy)isobutyrimidamide (1.53 g, 9.78 mmol) and TEA (2.76 mL, 19.81 mmol) were then dissolved in THF (20 mL) in a sealed microwave vial. The reaction mixture was heated to 100 °C and stirred for 12 h and then cooled to rt. After the vial had cooled, the mixture was filtered over celite, washed with ether, and concentrated. The crude residue was purified by flash column chromatography (0% ether/hexanes for 3 CV, 0%-5% ether/hexanes over 15 CV, 5% ether/hexanes for 5 CV). The appropriate fractions (identified by permanganate stain) were concentrated via rotovap (with a bath temp of 23 °C) to afford 3-isopropyl-5-vinyl-1,2,4-oxadiazole (**S30**, 550mg, 3.98 mmol, 40% yield) as a clear colorless liquid.

### 2.2.10 Synthesis of 3,5-dimethyl-1-vinyl-1H-pyrazole (S31)

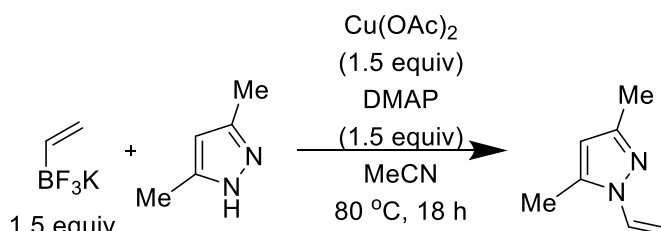

This product was synthesized via Chan-Lam coupling. Cu(OAc)<sub>2</sub> (1.5 equiv, 8.5 g, 47 mmol), DMAP (1.5 equiv, 5.7 g, 47 mmol), trifluoro(vinyl)-*l*-borane potassium salt (1.5 equiv, 6.3 g, 47 mmol), and 3,5-dimethyl-1*H*-pyrazole (1.0 equiv, 3.0 g, 31 mmol) were added to a 250 mL round-bottom flask and dissolved in MeCN (100 mL). The flask was sealed and heated to 80 °C under inert nitrogen atmosphere. After stirring for 18 h, the reaction was cooled to rt, diluted with Et<sub>2</sub>O, and filtered off the solids by passing through a short silica plug. The filtrate was concentrated carefully via rotovap in order to not lose the volatile product. The resulting crude residue was purified by flash column chromatography (0-100% Et<sub>2</sub>O/hexanes over 40 CV) and product containing fractions (identified by permanganate stain) were carefully concentrated to afford 3,5-dimethyl-1-vinyl-1*H*-pyrazole (**S31**, 1.8 g, 15 mmol, 47% yield) as a clear colorless liquid.

### 2.2.11 Synthesis of 3-(benzyloxy)-1-vinyl-1*H*-pyrazole (**S32**)

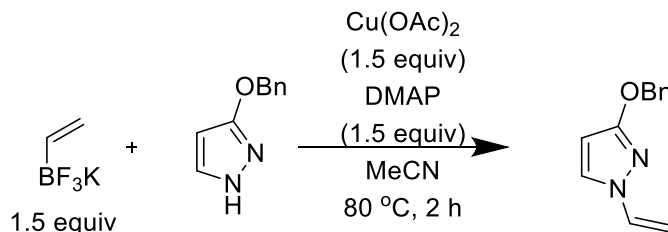

This product was synthesized via Chan-Lam coupling. Mixed DMAP (1.052 g, 8.61 mmol), Cu(OAc)<sub>2</sub> (1.564 g, 8.61 mmol), trifluoro(vinyl)-*l*-borane potassium salt (1.153 g, 8.61 mmol), and 3-(benzyloxy)-1*H*-pyrazole (1 g, 5.74 mmol) in MeCN (14.4 mL). The mixture was heated at 80 °C for 2 h under ambient atmosphere. The mixture was cooled to rt, diluted with MTBE, mixed with celite, filtered, washed with additional MTBE, and loaded onto additional celite by removing the solvent under vacuum. The material was then purified by flash column chromatography (RediSep Rf Gold® Normal-Phase Silica, 24 g, 0-50% EtOAc/heptanes) and product containing fractions (identified by permanganate stain) were concentrated to afford 3-(benzyloxy)-1-vinyl-1*H*-pyrazole (**S32** 475 mg, 2.372 mmol, 41.3 % yield) as a clear colorless oil.

### 2.3 Catalyst preparation:

All catalysts were synthesized according to known procedures and used directly.

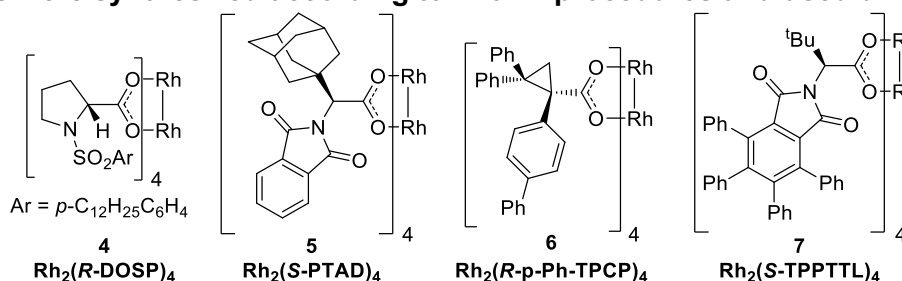

**Figure S3: Dirhodium tetracarboxylate catalysts used for cyclopropanation involving aza-heterocycles.**

$\text{Rh}_2(\text{R-DOSP})_4$  **4** was prepared using the procedure reported in the literature.<sup>12</sup>

$\text{Rh}_2(\text{S-PTAD})_4$  **5** was prepared using the procedure reported in the literature.<sup>13</sup>

$\text{Rh}_2(\text{R-p-Ph-TPCP})_4$  **6** was prepared using the procedure reported in the literature.<sup>14</sup>

$\text{Rh}_2(\text{R-TPPTTL})_4$  and  $\text{Rh}_2(\text{S-TPPTTL})_4$  **7** were prepared using the procedure reported in the literature.<sup>15</sup>

## 3. Procedures for cyclopropanation involving aza-heterocycles.

### 3.1 General procedure for cyclopropanation of vinyl-heterocycles with aryl-diazo-(*R*)-pantolactonates.

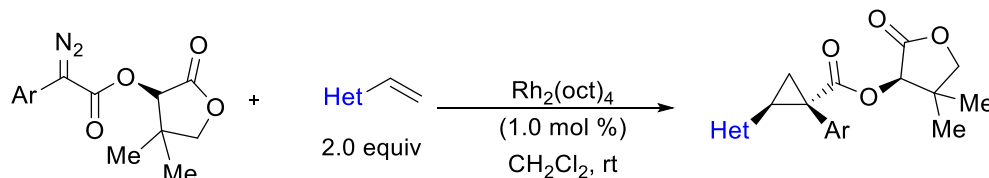

A 10 mL vial containing a stir bar was flame dried under vacuum along with a small round-bottom flask. Vessels were evacuated and purged with nitrogen 2 times to establish an inert atmosphere. Then catalytic rhodium octanoate dimer ( $\text{Rh}_2(\text{oct})_4$ , 1.0 mol %, 1.6 mg, 2.0  $\mu\text{mol}$ ) was added to the vial. Solid aryl-diazo-(*R*)-pantolactonate (1.0 equiv, 0.20 mmol) was added to the flame dried round bottom flask. Then vacuum was reestablished on both the vial and the flask to further

remove air from the system. After 5 min, the system was flushed with nitrogen and vinyl-heterocycle (2.0 equiv, 0.40 mmol) was added to the vial via preweighed syringe along with 2 mL dry  $\text{CH}_2\text{Cl}_2$  was added to the vial. The nitrogen line attached to the vial was then replaced by a balloon filled with argon. Diazo compound was dissolved in 3 mL dry  $\text{CH}_2\text{Cl}_2$  under an inert atmosphere. The round bottom flask was swirled to ensure all diazo had dissolved before the solution was loaded into a syringe. The syringe was then inserted through the vial septum and the full contents were injected into the vial in one portion. The reaction was stirred at room temperature overnight under argon (at least 13 h). The reaction solution was subjected to TLC to determine reaction completion (30% EtOAc/hexanes). Crude reaction was concentrated via rotovap and asymmetric induction was determined by  $^1\text{H}$  NMR of the crude reaction mixture. Purified by flash column chromatography (0% Et<sub>2</sub>O/hexanes for 3CV, 0-100% Et<sub>2</sub>O/hexanes over 30 CV, 100% Et<sub>2</sub>O for 3CV). Fractions containing only product by TLC were aggregated and concentrated via rotovap. Products **8-16** were synthesized via this method.

### 3.2. General procedure for the additive free cyclopropanation of vinyl-heterocycles with non-*ortho*-substituted aryl/heteroaryl-diazoacetates.

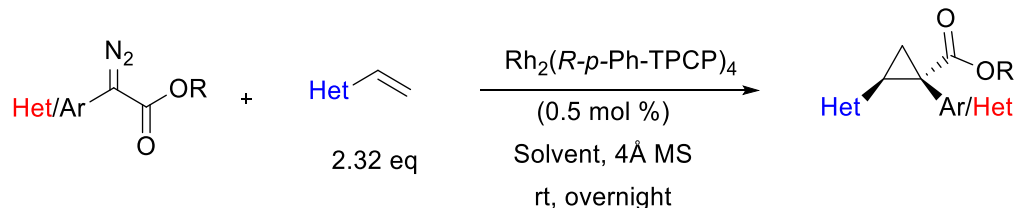

Compounds were prepared according to the established literature procedure for lab-scale cyclopropanation.<sup>16</sup> A 10 mL vial containing 4 Å activated molecular sieves (0.5 g) and a stir bar was flame dried under vacuum along with a small round-bottom flask. Vessels were evacuated and purged with nitrogen 2 times to establish an inert atmosphere. Then catalytic  $\text{Rh}_2(\text{R-p-Ph-TPCP})_4$  (0.5 mol %, 1.8 mg, 0.0001 mmol) was added to the vial. Solid diazo compound (1.0 equiv, 0.20 mmol) was added to the flame dried round bottom flask. Then vacuum was reestablished on both the vial and the flask to further remove air from the system. After 5 min, the system was flushed with nitrogen and vinyl-heterocycle (2.32 equiv, 1.0 mmol) was added to the vial via preweighed syringe along with 2 mL dry (MeO)<sub>2</sub>CO or  $\text{CH}_2\text{Cl}_2$ . The nitrogen line attached to the vial was then replaced by a balloon filled with argon. Diazo compound was dissolved in 3 mL dry (MeO)<sub>2</sub>CO or  $\text{CH}_2\text{Cl}_2$  under an inert atmosphere. The round bottom flask was swirled to ensure all diazo had dissolved before the solution was loaded into a syringe. The syringe was then inserted through the vial septum and the full contents were injected into the vial in one portion. The reaction was stirred overnight under argon (at least 13 h). The reaction solution was subjected to TLC to determine reaction completion (20% EtOAc/hexanes). After completion the solution was filtered through celite to remove molecular sieves before concentrating via rotovap. The crude concentrate was then directly purified by flash column chromatography (5% EtOAc/hexanes 3 CV, 5% EtOAc/hexanes to 30% EtOAc/hexanes 15 CV, 30% EtOAc/hexanes for 3-10 CV). Fractions containing only product by TLC were aggregated and concentrated via rotovap. Enantioselectivity was determined by chiral HPLC. Products **17-33** were synthesized via this method.

#### 3.2.1 Synthesis of *Tert*-butyl 5-bromo-3-(1-diazo-2-oxo-2-(2,2,2-trichloroethoxy)ethyl)-1*H*-indole-1-carboxylate (**34**).

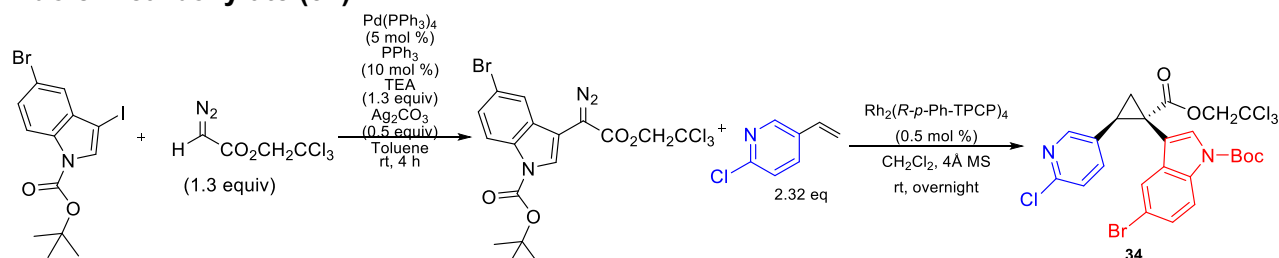

The diazo compound in question proved difficult to work with, but effective cyclopropanation was achieved by using the compound directly after a short column. Tetrakis(triphenylphosphine)palladium(0) (273.8 mg, 0.05 equiv, 236.9  $\mu\text{mol}$ ), triphenylphosphine (124.3 mg, 0.1 equiv, 473.9  $\mu\text{mol}$ ), *tert*-butyl 5-bromo-3-iodo-1*H*-indole-1-carboxylate (2.000 g, 1.0 equiv, 4.739 mmol), silver carbonate (653.3 mg, 0.5 equiv, 2.369 mmol) were added to a 100 mL flame-dried round bottom flask equipped with a magnetic stir-bar. The reagents were suspended in toluene (20 mL) under nitrogen, followed by addition of triethylamine (623.4 mg, 0.859 mL, 1.3 equiv, 6.160 mmol) and 2,2,2-trichloroethyl 2-diazoacetate (1.133 g, 1.1 equiv, 5.213 mmol). The resulting reaction was stirred at room temperature for 4 h and then filtered through a short path of silica gel, eluting with ethyl acetate. The volatile compounds were removed through reduced pressure and the residue was purified by column chromatography (1% -15% EtOAc in hexane) to give the desired product (2.259 g, 93% yield), ***tert*-butyl 5-bromo-3-(1-diazo-2-oxo-2-(2,2,2-trichloroethoxy)ethyl)-1*H*-indole-1-carboxylate**, as a bright orange solid after aggregation and evaporation of appropriate fractions.  $^1\text{H}$  NMR (400 MHz,  $\text{CDCl}_3$ )  $\delta$  8.11 (d,  $J$  = 88 Hz, 1H), 7.87 (s, 1H), 7.63 (d,  $J$  = 1.9 Hz, 1H), 7.46 (dd,  $J$  = 8.9, 1.9 Hz, 1H), 4.93 (s, 2H), 1.66 (s, 9H). HRMS: (+p APCI) Peak calculated for  $[\text{C}_{17}\text{H}_{15}\text{BrCl}_3\text{N}_3\text{O}_4 + \text{minus C}_5\text{H}_9\text{O}_2 \text{ minus N}_2 \text{ plus 3H}]$  381.88095, found 381.88001. IR (neat): 2954, 2091, 1737, 1713, 1451, 1370, 1306, 1270, 1249, 1243, 1120, 1153, 1113, 1050, 1009, 897, 853, 841, 803, 778, 766, 717, 634, 615, 586, 573  $\text{cm}^{-1}$ .

The product was used immediately in the subsequent cyclopropanation without further characterization. A 10 mL vial containing 4Å activated molecular sieves (0.5 g) and a stir bar was flame dried under vacuum along with a small round-bottom flask. Vessels were evacuated and purged with nitrogen 2 times to establish an inert atmosphere. Then catalytic  $\text{Rh}_2(R\text{-}p\text{-Ph-TPCP})_4$  (0.5 mol %, 1.8 mg, 0.0001 mmol) was added to the vial. Solid diazo compound (1.0 equiv, 100 mg, 0.20 mmol) was added to the flame dried round bottom flask. Then vacuum was reestablished on both the vial and the flask to further remove air from the system. After 5 min, the system was flushed with nitrogen and **35** (2.32 equiv, 0.46 mmol, 65 mg) was added to the vial via preweighed syringe along with 2 mL dry  $\text{CH}_2\text{Cl}_2$ . The nitrogen line attached to the vial was then replaced by a balloon filled with argon. Diazo compound was dissolved in 3 mL dry  $\text{CH}_2\text{Cl}_2$  under an inert atmosphere. The round bottom flask was swirled to ensure all diazo had dissolved before the solution was loaded into a syringe. The syringe was then inserted through the vial septum and the full contents were injected into the vial in one portion. The reaction was stirred overnight under argon (at least 13 h). The reaction solution was subjected to TLC to determine reaction completion (20% EtOAc/hexanes). After completion the solution was filtered through celite to remove molecular sieves before concentrating via rotovap. The crude concentrate was then directly purified by flash column chromatography (5% EtOAc/hexanes 3 CV, 5% EtOAc/hexanes to 30% EtOAc/hexanes 15 CV, 30% EtOAc/hexanes for 3-10 CV). Fractions containing only product by TLC were aggregated and concentrated via rotovap. Product (**34**) was obtained as a brown oil in 82% yield and 89% ee (0.16 mmol, 102 mg). Enantioselectivity was determined by chiral HPLC.

### 3.3 General procedure for the additive free cyclopropanation of vinyl-heterocycles with *ortho*-substituted aryl/heteroaryl-diazoacetates

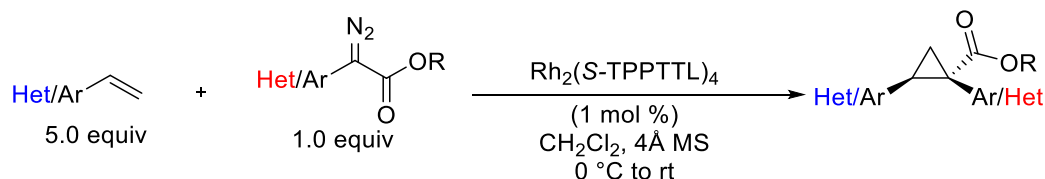

A 10 mL vial containing 4Å activated molecular sieves (0.5 g) and a stir bar was flame dried under vacuum along with a small round-bottom flask. Vessels were evacuated and purged with nitrogen 2 times to establish an inert atmosphere. Then catalyst  $\text{Rh}_2(\text{S-TPPTTL})_4$  (1.0 mol %, 4.9 mg, 0.002 mmol) was added to the vial. Solid diazo compound (1.0 equiv, 0.20 mmol) was added to the flame dried round bottom flask. Then vacuum was reestablished on both the vial and the flask to further remove air from the system. After 5 min, the system was flushed with nitrogen and vinyl pyridine (5.0 equiv, 1.0 mmol) was added to the vial via preweighed syringe and 2 mL distilled  $\text{CH}_2\text{Cl}_2$  was added to the vial. The nitrogen line attached to the vial was then replaced by a balloon filled with argon and the vial was added to an ice bath to maintain the temperature at 0 °C and let stir. Temperature of the ice bath was monitored by thermocouple external to the reaction vessel. While the vial cooled for approximately 10 min, the diazo compound was dissolved in 3 mL distilled  $\text{CH}_2\text{Cl}_2$  added via syringe. The round bottom flask was swirled to ensure all diazo had dissolved before the solution was loaded into the syringe. The syringe was then inserted through the vial septum and the full contents were injected into the vial in one portion maintaining the bath at 0 °C throughout the addition. The reaction was stirred overnight under argon in the ice bath which slowly warmed to room temperature (at least 13 h). The reaction solution was subjected to TLC to determine reaction completion (20% EtOAc/hexanes). After completion the solution was filtered through celite to remove molecular sieves before concentrating via rotovap. The crude concentrate was then directly purified by flash column chromatography (5% EtOAc/hexanes 3 CV, 5% EtOAc/hexanes to 30% EtOAc/hexanes 15 CV, 30% EtOAc/hexanes for 3-10 CV). Fractions containing only product by TLC were aggregated and concentrated via rotovap. Enantioselectivity was determined by chiral HPLC. Products **37-46** were synthesized via this method.

### 3.4 General procedure for the additive promoted cyclopropanation involving *ortho*-substituted aryl/heteroaryl-diazoacetates.

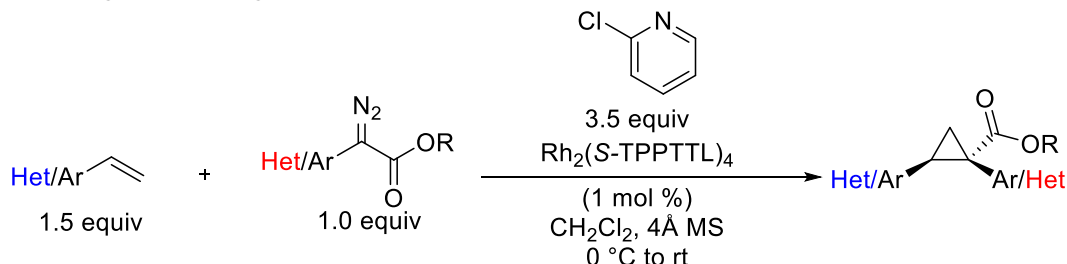

A 10 mL vial containing 4Å activated molecular sieves (0.5 g) and a stir bar was flame dried under vacuum along with a small round-bottom flask. Vessels were evacuated and purged with nitrogen 2 times to establish an inert atmosphere. Then catalytic  $\text{Rh}_2(\text{S-TPPTTL})_4$  (1.0 mol %, 4.9 mg, 0.002 mmol) was added to the vial. Solid diazo compound (1.0 equiv, 0.20 mmol) was added to the flame dried round bottom flask. Then vacuum was reestablished on both the vial and the flask to further remove air from the system. After 5 min, the system was flushed with nitrogen, vinyl-heterocycle (1.5 equiv, 0.30 mmol), and 2-Clpyridine (3.5 equiv, 79 mg, 66  $\mu\text{L}$ , 0.70 mmol) was added to the vial via syringe along with 2 mL dry  $\text{CH}_2\text{Cl}_2$ .

The nitrogen line attached to the vial was then replaced by a balloon filled with argon and the vial was added to an ice bath to maintain the temperature at 0 °C and let stir. Temperature of the ice bath was monitored by thermocouple external to the reaction vessel. While the vial cooled for approximately 10 min, the diazo compound was dissolved in 3 mL dry CH<sub>2</sub>Cl<sub>2</sub> added via syringe. The round bottom flask was swirled to ensure all diazo had dissolved before the solution was loaded into the syringe. The syringe was then inserted through the vial septum and the full contents were injected into the vial in one portion maintaining the bath at 0 °C throughout the addition. The reaction was stirred overnight under argon in the ice bath which slowly warmed to room temperature (at least 13 h). The reaction solution was subjected to TLC to determine reaction completion (20% EtOAc/hexanes). After completion the solution was filtered through celite to remove molecular sieves before concentrating via rotovap. The crude concentrate was then directly purified by flash column chromatography (5% EtOAc/hexanes 3 CV, 5% EtOAc/hexanes to 30% EtOAc/hexanes 15 CV, 30% EtOAc/hexanes for 3-10 CV). Fractions containing only product by TLC were aggregated and concentrated via rotovap. Enantioselectivity was determined by chiral HPLC. Products **37**, **47-49**, **52-53**, **56-57**, **62-65** were synthesized via this method.

### 3.5 General procedure for the additive promoted cyclopropanation involving *ortho*-substituted aryl/heteroaryl-diazoacetates and HFIP.

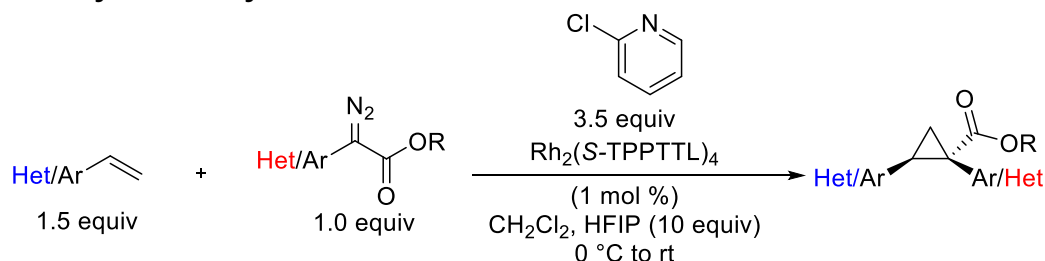

A 10 mL vial containing a stir bar was flame dried under vacuum along with a small round-bottom flask. Vessels were evacuated and purged with nitrogen 2 times to establish an inert atmosphere. Then catalytic  $\text{Rh}_2(\text{S-TPPTTL})_4$  (1.0 mol %, 4.9 mg, 0.002 mmol) was added to the vial. Solid diazo compound (1.0 equiv, 0.20 mmol) was added to the flame dried round bottom flask. Then vacuum was reestablished on both the vial and the flask to further remove air from the system. After 5 min, the system was flushed with nitrogen, vinyl-heterocycle (1.5 equiv, 0.30 mmol), 2-Clpyridine (3.5 equiv, 79 mg, 66  $\mu\text{L}$ , 0.70 mmol), and 1,1,1,3,3,3-hexafluoroisopropanol (HFIP, 10 equiv, 340 mg, 0.21 mL, 2.0 mmol) was added to the vial via syringe along with 2 mL dry  $\text{CH}_2\text{Cl}_2$ . The nitrogen line attached to the vial was then replaced by a balloon filled with argon and the vial was added to an ice bath to maintain the temperature at 0 °C and let stir. Temperature of the ice bath was monitored by thermocouple external to the reaction vessel. While the vial cooled for approximately 10 min, the diazo compound was dissolved in 3 mL distilled  $\text{CH}_2\text{Cl}_2$  added via syringe. The round bottom flask was swirled to ensure all diazo had dissolved before the solution was loaded into the syringe. The syringe was then inserted through the vial septum and the full contents were injected into the vial in one portion maintaining the bath at 0 °C throughout the addition. The reaction was stirred overnight under argon and allowed to warm to room temperature (at least 13 h). The reaction solution was subjected to TLC to determine reaction completion (20% EtOAc/hexanes). After completion the solution was filtered through celite to remove molecular sieves before concentrating via rotovap. The crude concentrate was then directly purified by flash column chromatography (5% EtOAc/hexanes 3 CV, 5% EtOAc/hexanes to 30% EtOAc/hexanes 15CV, 30% EtOAc/hexanes for 3-10 CV). Fractions containing product by TLC were aggregated and concentrated via rotovap. Enantioselectivity was determined by chiral HPLC. Products **37-39**, **47-51**, **54-55**, **58-61** were synthesized via this method.

### 3.6 Procedure for one-Pot hydrazone oxidation/cyclopropanation

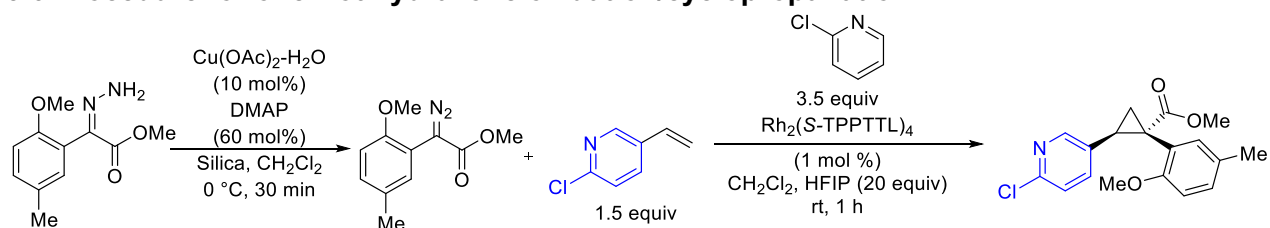

In the first step: A 20 mL scintillation vial was charged with  $\text{Cu}(\text{OAc})_2 \cdot \text{H}_2\text{O}$  (3.9 mg, 0.020 mmol, 10 mol %), silica powder (44.4 mg, 100 wt%, SiliaFlash® P60, 40-63  $\mu\text{m}$ ), and 1.0 mL solution of 0.06 mol/L DMAP in  $\text{CH}_2\text{Cl}_2$ . The initial mixture was stirred vigorously with a stir bar (600 rpm) under air for 5 min before hydrazone was added. In a 4 mL scintillation vial, methyl (Z)-2-hydrazineylidene-2-(2-methoxy-5-methylphenyl)acetate (44.4 mg, 0.20 mmol, 1.0 equiv) was dissolved in 1.0 mL of the 0.06 mol/L DMAP in  $\text{CH}_2\text{Cl}_2$  solution. The hydrazone/DMAP  $\text{CH}_2\text{Cl}_2$  solution was then transferred by syringe in one portion to the initial mixture of  $\text{Cu}(\text{OAc})_2 \cdot \text{H}_2\text{O}$ /silica/DMAP  $\text{CH}_2\text{Cl}_2$  solution. The reaction was stirred for 0.5 h before next step to afford a crude solution of **36**.

In the second step: a 20 mL scintillation vial equipped with a stir bar was flame dried under vacuum. After cooling down, the vial was charged with  $\text{Rh}_2(\text{S-TPPTTL})_4$  (4.9 mg, 1.0 mol %, 0.0020 mmol), then flushed with nitrogen for 3 times and the nitrogen balloon was left on the septum. Then HFIP (672.2 mg, 0.42 mL, 20 equiv, 4.0 mmol), 2-chloropyridine (79.5 mg, 66  $\mu\text{L}$ , 3.5 equiv, 0.70 mmol), 2-chloro-5-vinylpyridine (**35**, 41.9 mg, 1.5 equiv, 0.30 mmol) and 2.0 mL  $\text{CH}_2\text{Cl}_2$  were added sequentially via syringe, the mixture was stirred at 600 rpm for 10 min before crude diazo injection. The crude diazo mixture from step 1 (~1.5 mL) was added by syringe to the 2-chloro-5-vinylpyridine/ $\text{Rh}_2(\text{S-TPPTTL})_4$ /HFIP/2-chloropyridine solution in one portion. The reaction was then stirred 1 h under nitrogen at r.t. After completion the solution was concentrated under rotovap and purified by flash column chromatography (5 % EtOAc/hexanes 3 CV, 5 % EtOAc/hexanes to 30 % EtOAc/hexanes 15 CV, 30 % EtOAc/hexanes 10 CV). Cyclopropanation product was concentrated to give a clear colorless oil in 83% yield (**37**, 55.2 mg, 0.166 mmol) and 98% ee. Repeating the same reaction without addition of the HFIP resulted in recovery of unreacted diazo compound **36**.

## Results and Discussion

### 4. Characterization of synthesized compounds.

#### 4.1 Characterization of novel starting materials

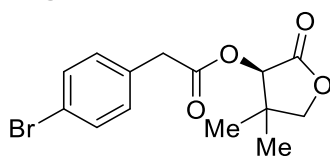

**(R)-4,4-dimethyl-2-oxotetrahydrofuran-3-yl 2-(4-bromophenyl)acetate.** This compound was prepared according to the procedure outlined in 2.2.1.1 on 23.3 mmol scale. After isolation the product was obtained as off-white crystalline solid (70% yield, 5.3 g, 16 mmol).

**MP:** 62-63 °C

**$^1\text{H}$  NMR** (400 MHz,  $\text{CDCl}_3$ )  $\delta$  7.45(d,  $J$  = 8.2 Hz, 2H), 7.18 (d,  $J$  = 8.2 Hz, 2H), 5.34 (s, 1H), 4.05 – 3.95 (m, 2H), 3.72 (s, 2H), 1.12 (s, 3H), 0.99 (s, 3H).

**$^{13}\text{C}$  NMR** (151 MHz,  $\text{CDCl}_3$ )  $\delta$  172.1, 169.9, 132.2, 131.8, 131.1, 121.5, 76.2, 75.5, 40.2, 40.2, 22.9, 19.8.

**HRMS:** (+p APCI) calculated for  $[\text{C}_{14}\text{H}_{16}\text{O}_4^{79}\text{Br}^+]$  327.0227, found 327.0227

**IR**(neat): 2967, 2931, 1779, 1745, 1592, 1488, 1465, 1400, 1269, 1351, 1297, 1242, 1139, 1072, 1031, 1012, 997, 914, 851, 801, 754, 735, 573, 540, 491  $\text{cm}^{-1}$

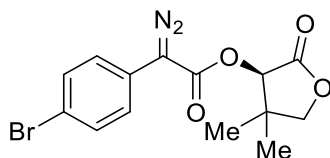

**(R)-4,4-dimethyl-2-oxotetrahydrofuran-3-yl 2-(4-bromophenyl)-2-diazoacetate S17.** This compound was prepared according to the procedure outlined in 2.2.1.2 on 6.11 mmol scale. After isolation the product was obtained as a powdery orange solid (60% yield, 1.30 g, 3.68 mmol).

**MP:** 95-99 °C diazo decomposes rapidly after melting

**$^1\text{H}$  NMR**(400 MHz,  $\text{CDCl}_3$ )  $\delta$  7.59 – 7.42 (m, 2H), 7.42 – 7.31 (m, 2H), 5.52 (s, 1H), 4.08 (m, 2H), 1.25 (s, 3H), 1.13 (s, 3H).

**$^{13}\text{C}$  NMR** (151 MHz,  $\text{CDCl}_3$ )  $\delta$  172.1, 163.4, 132.2, 125.5, 123.9, 119.9, 76.2, 75.4, 40.2, 22.9, 19.8.

**HRMS:** (+p APCI) Compound decomposed in ESI-MS to give OH-insertion product. Peak calculated for  $[\text{C}_{14}\text{H}_{14}\text{O}_4^{79}\text{Br}^+]$  325.007, found 325.0075

**IR**(neat): 2970, 2089, 1783, 1738, 1490, 1464, 1365, 1275, 1230, 1217, 1141, 1086, 1031, 1009, 996, 970, 920, 821, 781, 731, 647, 575, 543, 528, 515, 493  $\text{cm}^{-1}$

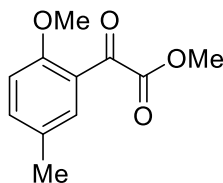

**Methyl 2-(2-methoxy-5-methylphenyl)-2-oxoacetate.** This compound was prepared according to the procedure outlined in 2.2.2.1 from the reaction between 4-methyl anisole and methyl-oxalyl chloride on 81.9 mmol scale. After isolation the product was obtained as a light yellow liquid (93% yield, 15.9 g, 76.4 mmol).

**$^1\text{H}$  NMR** (600 MHz,  $\text{CDCl}_3$ )  $\delta$  7.67 (d,  $J$  = 2.5 Hz, 1H), 7.39 (dd,  $J$  = 8.5, 2.4 Hz, 1H), 6.88 (d,  $J$  = 8.5 Hz, 1H), 3.91 (s, 3H), 3.84 (s, 3H).

**<sup>13</sup>C NMR** (151 MHz, CDCl<sub>3</sub>) δ 186.4, 165.7, 158.5, 137.1, 130.9, 130.6, 122.4, 112.2, 56.3, 52.3, 20.2.

**HRMS:** (+p APCI) calculated for [C<sub>11</sub>H<sub>13</sub>O<sub>4</sub>]<sup>+</sup> 209.0808, found 209.0806

**IR**(neat): 2951, 1739, 1667, 1608, 1581, 1497, 1412, 1272, 1245, 1224, 1179, 1155, 1133, 1019, 947, 901, 864, 813, 778, 712, 669, 588, 537, 489 cm<sup>-1</sup>

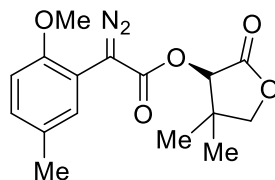

**(R)-4,4-dimethyl-2-oxotetrahydrofuran-3-yl 2-diazo-2-(2-methoxy-5-methylphenyl)acetate S18.**

This compound was prepared according to the procedure outlined in 2.2.2.4 from (R)-4,4-dimethyl-2-oxotetrahydrofuran-3-yl 2-(2-methoxy-5-methylphenyl)-2-oxoacetate. After isolation the product was obtained as a yellow solid (7.3 g, 23 mmol, 82% yield).

**<sup>1</sup>H NMR** (500 MHz, CDCl<sub>3</sub>) δ 7.37 (d, J = 2.2 Hz, 1H), 7.09 – 7.04 (m, 1H), 6.80 (d, J = 8.4 Hz, 1H), 5.50 (s, 1H), 4.10 – 4.02 (m, 2H), 3.84 (s, 3H), 2.33 – 2.29 (m, 3H), 1.25 (s, 3H), 1.12 (s, 3H);

**<sup>13</sup>C NMR** (101 MHz, CDCl<sub>3</sub>) δ 172.4, 153.5, 130.6, 130.5, 129.4, 112.5, 110.9, 76.2, 75.2, 55.6, 40.2, 23.0, 20.5, 19.8

**HRMS:** (ESI) m/z calculated for C<sub>16</sub>H<sub>18</sub>N<sub>2</sub>O<sub>5</sub>Na [M+Na]<sup>+</sup>, 475.1533; found 475.1545.

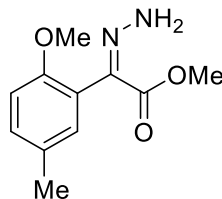

**Methyl (E/Z)-2-hydrazineylidene-2-(2-methoxy-5-methylphenyl)acetate.** This compound was prepared according to the procedure outlined in 2.2.3.1 between methyl 2-(2-methoxy-5-methylphenyl)-2-oxoacetate and hydrazine on 38.4 mmol scale. After isolation the product was obtained as a mixture of isomers as a clear, colorless clear colorless oil (89% yield, 7.56 g, 34 mmol). Pure Z-isomer appears as an off-white solid, pure E-isomer is obtained as a white solid.

**MP:** 63-65 °C – Z-isomer, 72-75 °C – E-isomer,

**<sup>1</sup>H NMR** (400 MHz, CDCl<sub>3</sub>) Z-Isomer: δ 8.13 (s, 2H), 7.14 – 7.12 (m, 2H), 7.10 (dt, J = 2.4, 0.8 Hz, 1H), 6.79 (d, J = 8.1 Hz, 1H), 3.76 (s, 3H), 3.73 (s, 3H), 2.30 (d, J = 0.8 Hz, 3H). E-isomer: δ 7.21 (ddq, J = 8.6, 2.3, 0.7 Hz, 1H), 6.97 (dt, J = 2.3, 0.6 Hz, 1H), 6.90 (d, J = 8.4 Hz, 1H), 6.11 (s, 2H), 3.83 (s, 3H), 3.77 (s, 3H).

**<sup>13</sup>C NMR** (151 MHz, CDCl<sub>3</sub>) Z-Isomer: δ 163.7, 155.9, 130.7, 130.3, 130.2, 126.3, 111.1, 56.0, 51.6, 20.6. E-isomer: δ 165.3, 155.1, 136.1, 131.9, 130.8, 130.7, 118.3, 111.9, 56.1, 52.6, 20.7.

**HRMS:** (+p APCI) calculated for [C<sub>11</sub>H<sub>15</sub>O<sub>3</sub>N<sub>2</sub>]<sup>+</sup> 223.1077, found 223.1077 for Z isomer, found 223.1079 for E isomer.

**IR**(neat): Z-Isomer: 3454, 3293, 2948, 2836, 1695, 1575, 1498, 1463, 1435, 1295, 1266, 1245, 1186, 1150, 1130, 1037, 1025, 993, 887, 808, 730, 670, 496. E-Isomer: 3407, 3294, 3210, 2948, 2838, 1708, 1608, 1557, 1496, 1435, 1316, 1238, 1185, 1119, 1046, 1025, 950, 872, 810, 781, 729, 468 cm<sup>-1</sup>

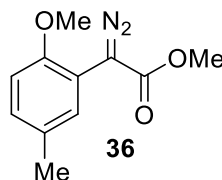

**Methyl 2-diazo-2-(2-methoxy-5-methylphenyl)acetate (S19)**

This compound was prepared according to the procedure outlined in 2.2.3.2 between methyl (E/Z)-2-hydrazineylidene-2-(2-methoxy-5-methylphenyl)acetate and TsNIK on 14.06 mmol scale. After isolation the product was obtained as a mixture of isomers as a bright orange powder (80% yield, 2.5 g, 11.3 mmol).

**MP:** 55-60 °C

**<sup>1</sup>H NMR** (600 MHz, CDCl<sub>3</sub>) δ 7.36 (s, 1H), 7.06 (d, J = 8.41 Hz, 1H), 6.79 (d, J = 8.42 Hz, 1H), 3.83 (s, 3H), 3.82 (s, 3H), 2.31 (s, 3H).

**<sup>13</sup>C NMR** (151 MHz, CDCl<sub>3</sub>) δ 166.8, 153.5, 130.7, 130.5, 129.2, 113.3, 110.9, 55.7, 51.9, 20.6. Please note that the diazo carbon was not visible by <sup>13</sup>C NMR.

**HRMS:** (+p APCI) calculated for [C<sub>11</sub>H<sub>13</sub>O<sub>3</sub>N<sub>2</sub>]<sup>+</sup> 221.0921, found 221.0922

**IR**(neat): 2090, 1693, 1503, 1434, 1339, 1291, 1248, 1186, 1138, 1048, 804, 743 cm<sup>-1</sup>

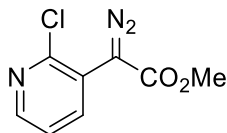

**Methyl 2-(2-chloropyridin-3-yl)-2-diazoacetate (S20).** This compound was prepared according to the procedure outlined in 2.2.4 between methyl 2-(2-chloropyridin-3-yl)acetate and *p*-ABSA on 29.1 mmol scale. After isolation the product was obtained as a bright yellow solid (96% yield, 5.9 g, 27.9 mmol).

**MP:** 71-73 °C

**<sup>1</sup>H NMR** (400 MHz, CDCl<sub>3</sub>) δ 8.35 (dd, *J* = 4.7, 1.9 Hz, 1H), 7.95 (dd, *J* = 7.8, 1.9 Hz, 1H), 7.32 (dd, *J* = 7.8, 4.7 Hz, 1H), 3.86 (s, 3H).

**<sup>13</sup>C NMR** (151 MHz, CDCl<sub>3</sub>) δ 165.4, 149.2, 148.9, 140.5, 122.7, 121.6, 52.5. Please note that the diazo carbon was not visible by <sup>13</sup>C NMR.

**HRMS:** (+p APCI) calculated for [C<sub>8</sub>H<sub>7</sub>O<sub>2</sub>N<sub>3</sub><sup>35</sup>Cl +] 212.0221, found 212.0222

**IR**(neat): 2097, 1694, 1555, 1455, 1435, 1402, 1344, 1272, 1211, 1193, 1162, 1128, 1099, 1060, 1023, 1006, 798, 737, 727 cm<sup>-1</sup>

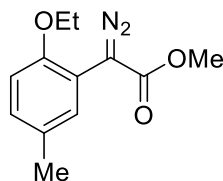

**Methyl 2-diazo-2-(2-ethoxy-5-methylphenyl)acetate (S21)**

This compound was prepared according to the procedure outlined in 2.2.5.2 from methyl 2-(2-ethoxy-5-methylphenyl)-2-oxoacetate on 9.6 mmol scale. After isolation the product was obtained as an orange oil which crystallized upon standing (1.08 g, 4.61 mmol, 52% yield over 2 steps)

**<sup>1</sup>H NMR** (400 MHz, CDCl<sub>3</sub>) δ 7.36 (d, *J* = 2.3 Hz, 1H), 7.02 (ddd, *J* = 8.4, 2.3, 0.8 Hz, 1H), 6.77 (d, *J* = 8.4 Hz, 1H), 4.02 (q, *J* = 7.0 Hz, 2H), 3.83 (s, 3H), 2.29 (d, *J* = 0.7 Hz, 3H), 1.41 (t, *J* = 6.9 Hz, 3H);

**<sup>13</sup>C NMR** (101 MHz, CDCl<sub>3</sub>) δ 166.9, 152.8, 130.6, 130.4, 129.0, 113.3, 111.7, 64.2, 52.0, 20.7, 14.8;

**HRMS** (ESI) *m/z* calculated for C<sub>12</sub>H<sub>14</sub>N<sub>2</sub>O<sub>3</sub>Na [M+Na]<sup>+</sup>, 257.0897; found 257.0899.

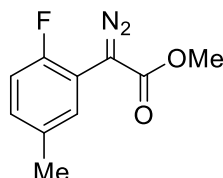

**Methyl 2-diazo-2-(2-fluoro-5-methylphenyl)acetate (S22)**

This compound was prepared according to the procedure outlined in 2.2.6 from 2-bromo-1-fluoro-4-methylbenzene. After isolation the product was obtained as a yellow solid (406 mg, 1.950 mmol, 47% yield over 2 steps)

**<sup>1</sup>H NMR** (500 MHz, CDCl<sub>3</sub>) δ 7.49 – 7.43 (m, 1H), 7.05 – 6.99 (m, 1H), 6.96 (dd, *J* = 10.8, 8.4 Hz, 1H), 3.86 (s, 3H), 2.33 (q, *J* = 0.8 Hz, 3H);

**<sup>13</sup>C NMR** (101 MHz, CDCl<sub>3</sub>) δ 157.9, 155.5, 134.2, 134.2, 129.7 (d, *J* = 2.0 Hz), 129.2 (d, *J* = 8.0 Hz), 115.4, 115.2, 52.1 20.8.

**<sup>19</sup>F NMR** (376 MHz, DMSO) δ -118.92 (q, *J* = 7.9 Hz).

**HRMS** (ESI) *m/z* calculated for C<sub>10</sub>H<sub>9</sub>FN<sub>2</sub>O<sub>2</sub>Na [M+Na]<sup>+</sup>, 231.054; found 231.0543.

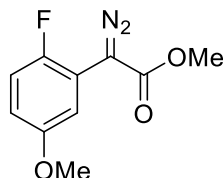

**Methyl 2-diazo-2-(2-fluoro-5-methoxyphenyl)acetate (S23)**

This compound was prepared according to the procedure outlined in 2.2.7 from 2-(2-fluoro-5-methoxyphenyl)acetic acid. After isolation the product was obtained as a bright yellow solid (977 mg, 4.36 mmol, 56% yield over 2 steps)

**<sup>1</sup>H NMR** (600 MHz, CDCl<sub>3</sub>) δ 7.29 – 7.22 (m, 1H), 6.98 (dd, *J* = 10.6, 9.0 Hz, 1H), 6.74 (ddd, *J* = 9.0, 3.9, 3.1 Hz, 1H), 3.86 (s, 3H), 3.79 (s, 3H);

**<sup>13</sup>C NMR** (101 MHz, CDCl<sub>3</sub>) δ 165.6, 156.0, 155.9, 153.9, 151.5, 116.2, 116.0, 113.9 (d, *J* = 8.1 Hz), 113.4 (d, *J* = 2.2 Hz), 55.8, 52.2.

**<sup>19</sup>F NMR** (376 MHz, CDCl<sub>3</sub>) δ -124.99.

**HRMS** (ESI) *m/z* calculated for C<sub>10</sub>H<sub>9</sub>FN<sub>2</sub>O<sub>3</sub>Na [M+Na]<sup>+</sup>, 247.0489; found 247.0490

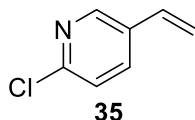

**2-Chloro-5-vinylpyridine (35).** This compound was prepared according the procedure outlined in **2.2.8.1** from the Wittig reaction between methyltriphenylphosphonium bromide (1.2 equiv, 85 mmol, 30.3 g), 6-chloronicotinaldehyde (71 mmol, 10 g), and potassium *tert*-butoxide (1.2 equiv, 85 mmol, 9.5 g). After isolation, the product was obtained as a clear colorless oil (65% yield, 6.4g, 46 mmol).

**<sup>1</sup>H NMR** (600 MHz, CDCl<sub>3</sub>) δ 8.31 (d, *J* = 2.36, 1H), 7.65 (dd, *J* = 2.64, 8.42 Hz, 1H), 7.23 (d, *J* = 8.33 Hz, 1H), 6.61 (dd, *J* = 10.97, 17.58 Hz, 1H), 5.76 (d, *J* = 17.61 Hz, 1H), 5.36 (d, *J* = 10.93 Hz, 1H).

**<sup>13</sup>C NMR** (151 MHz, CDCl<sub>3</sub>) δ 150.3, 147.9, 135.3, 132.0, 124.0, 124.0, 116.9

**HRMS:** (+p APCI) calculated for [C<sub>7</sub>H<sub>7</sub>N<sup>35</sup>Cl +] 140.0262, found 140.0261

**IR**(neat): 1633, 1592, 1558, 1458, 1422, 1360, 1142, 1099, 1019, 999, 919, 834, 804, 748, 639, 631, 622, 502, 489 cm<sup>-1</sup>

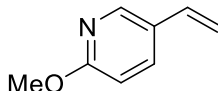

**2-Methoxy-5-vinylpyridine (S24).** This compound was prepared according the procedure outlined in **2.2.8.1** from the Wittig reaction between methyltriphenylphosphonium bromide (1.2 equiv, 85 mmol, 30.3 g), 6-methoxynicotinaldehyde (71 mmol, 10 g), and potassium *tert*-butoxide (1.2 equiv, 85 mmol, 9.5 g). After isolation, the product was obtained as a clear colorless oil (63% yield).

**<sup>1</sup>H NMR** (600 MHz, CDCl<sub>3</sub>) δ 8.11 (d, *J* = 2.28, 1H), 7.68 (dd, *J* = 2.53, 8.85 Hz, 1H), 6.70 (d, *J* = 8.57 Hz, 1H), 6.63 (dd, *J* = 10.81, 17.32 Hz, 1H), 5.62 (d, *J* = 17.50 Hz, 1H), 5.20 (d, *J* = 10.92 Hz, 1H), 3.92 (s, 3H).

**<sup>13</sup>C NMR** (151 MHz, CDCl<sub>3</sub>) δ 163.8, 145.5, 135.2, 133.0, 126.7, 112.9, 110.8, 53.4

**HRMS:** (+p APCI) calculated for [C<sub>8</sub>H<sub>10</sub>ON +] 136.0757, found 136.0757

**IR**(neat): 1632, 1598, 1566, 1491, 1461, 1368, 1303, 1282, 1255, 1126, 1019, 987, 901, 830, 764, 729, 587, 554, 509 cm<sup>-1</sup>

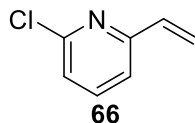

**2-Chloro-6-vinylpyridine (66).** This compound was prepared according to the procedure outlined in **2.2.8.1** from the Wittig reaction between methyltriphenylphosphonium bromide (1.2 equiv, 42.4 mmol, 15.1 g), 2-chloronicotinaldehyde (35.3 mmol, 5.0 g), and potassium *tert*-butoxide (1.2 equiv, 42.4 mmol, 4.76 g). 6-chloropicolinaldehyde. After isolation, the product was obtained as a clear yellow oil (54% yield, 19 mmol, 2.65 g).

**<sup>1</sup>H NMR** (400 MHz, CDCl<sub>3</sub>) δ 7.58 (t, *J* = 7.7 Hz, 1H), 7.21 (d, *J* = 7.6 Hz, 1H), 7.16 (d, *J* = 7.9 Hz, 1H), 6.72 (dd, *J* = 17.4, 10.8 Hz, 1H), 6.24 (d, *J* = 17.4 Hz, 1H), 5.50 (d, *J* = 10.8 Hz, 1H).

**<sup>13</sup>C NMR** (151 MHz, CDCl<sub>3</sub>) δ 156.4, 151.2, 139.0, 135.4, 122.9, 119.9, 119.6.

**HRMS:** (+p APCI) calculated for [C<sub>7</sub>H<sub>7</sub>N<sup>35</sup>Cl +] 140.0262, found 140.0263

**IR**(neat): 1580, 1551, 1441, 1411, 1396, 1161, 1135, 983, 931, 846, 803, 744, 676 cm<sup>-1</sup>

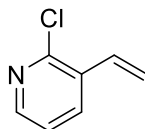

**2-Chloro-3-vinylpyridine (S25).** This compound was prepared according to the procedure outlined in **2.2.8.1** from the Wittig reaction between methyltriphenylphosphonium bromide (1.2 equiv, 42.4 mmol, 15.1g), 2-chloronicotinaldehyde (35.3 mmol, 5.0 g), and potassium *tert*-butoxide (1.2 equiv, 42.4 mmol, 4.76 g). After isolation, the product was obtained as a clear colorless oil (58% yield, 20.6 mmol, 2.88 g).

**<sup>1</sup>H NMR** (400 MHz, CDCl<sub>3</sub>) δ 8.18 (t, *J*=2.35 Hz, 1H), 7.76 (dd, *J*=1.96, 7.75 Hz, 1H), 7.13 (dd, *J*=4.71, 7.75 Hz, 1H), 6.91 (dd, *J*=11.01, 17.54 Hz, 1H), 5.68 (d, *J* = 17.49 Hz, 1H), 5.38 (d, *J*=10.99 Hz, 1H)

**<sup>13</sup>C NMR** (151 MHz, CDCl<sub>3</sub>) δ 149.8, 148.5, 134.9, 132.2, 131.9, 122.7, 118.6

**HRMS:** (+p APCI) calculated for [C<sub>7</sub>H<sub>7</sub>N<sup>35</sup>Cl +] 140.0262, found 140.0262

**IR**(neat): 1627, 1577, 1558, 1450, 1426, 1410, 1380, 1186, 1128, 1062, 1028, 985, 921, 804, 752, 683, 658 cm<sup>-1</sup>

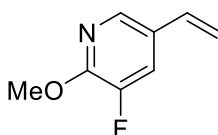

**2-Methoxy-3-fluoro-5-vinylpyridine (S26).** This compound was prepared according to the procedure outlined in **2.2.8.2** from the Suzuki coupling between 2-methoxy-3-fluoro-5-bromopyridine (6.65 mmol, 1.37 g) and vinylboronic acid pinacol ester (1.5 equiv, 1.54 g, 9.98 mmol) in the presence of PAPH (1.5 mol %, 0.1mmol, 29 mg), and K<sub>2</sub>CO<sub>3</sub> (2.5 equiv, 16.6

mmol, 2.3 g) and  $\text{Pd}_2(\text{dba})_3$  (0.5 mol %, 0.03 mmol, 30.4 mg). After isolation, the product was obtained as a clear colorless oil (71% yield, 4.73 mmol, 725 mg).

**$^1\text{H}$  NMR** (600 MHz,  $\text{CDCl}_3$ )  $\delta$  7.86 (s, 1H), 7.43 (d,  $J$  = 11.00 Hz, 1H), 6.62 (dd,  $J$  = 11.26, 17.59 Hz, 1H), 5.61 (d,  $J$  = 17.58 Hz, 1H), 5.26 (d,  $J$  = 10.96 Hz, 1H), 4.02 (s, 3H).

**$^{13}\text{C}$  NMR** (151 MHz,  $\text{CDCl}_3$ )  $\delta$  152.9 d,  $J$  = 11.5 Hz, 148.6, 139.8, 132.1, 127.9, 119.1 (d,  $J$  = 15.5 Hz), 114.3, 53.8

**$^{19}\text{F}$  NMR** (151 MHz,  $\text{CDCl}_3$ )  $\delta$  -140.15 (d,  $J$  = 11.2 Hz).

**HRMS:** (+p APCI) calculated for  $[\text{C}_8\text{H}_9\text{ONF}]^+$  154.0663, found 154.0662

**IR**(neat): 1633, 1611, 1571, 1493, 1460, 1440, 1420, 1400, 1318, 1255, 1211, 1196, 1173, 1146, 1133, 1042, 1013, 986, 959, 896, 778, 750, 700, 627, 555, 525, 500, 440, 423  $\text{cm}^{-1}$

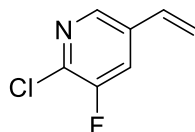

**2-Chloro-3-fluoro-5-vinylpyridine (S27).** This compound was prepared according to the procedure outlined in **2.2.8.2** from the Suzuki coupling between 2-methoxy-3-chloro-5-bromopyridine (12 mmol, 2.5 g) and vinylboronic acid pinacol ester (1.5 equiv, 2.7 g, 18 mmol) in the presence of PAPH (1.5 mol %, 0.18 mmol, 52 mg), and  $\text{K}_2\text{CO}_3$  (2.5 equiv, 30 mmol, 4.1 g) and  $\text{Pd}_2(\text{dba})_3$  (0.5 mol %, 0.06 mmol, 54 mg). After isolation, the product was obtained as a clear colorless oil which crystallizes in the freezer as needlelike crystals that melt at room temperature (75% yield, 8.57 mmol, 1.35 g).

**MP:** 25  $^\circ\text{C}$

**$^1\text{H}$  NMR** (400 MHz,  $\text{CDCl}_3$ )  $\delta$  8.18 (d,  $J$  = 2.0 Hz, 1H), 7.51 (dd,  $J$  = 9.0, 2.0 Hz, 1H), 6.67 (dd,  $J$  = 17.5, 11.0 Hz, 1H), 5.83 (d,  $J$  = 17.6 Hz, 1H), 5.48 (d,  $J$  = 11.0 Hz, 1H).

**$^{13}\text{C}$  NMR** (151 MHz,  $\text{CDCl}_3$ )  $\delta$  155.7, 153.9, 142.9 (d,  $J$  = 5.0 Hz), 137.8 (d,  $J$  = 19.8 Hz), 134.5 (d,  $J$  = 2.9 Hz), 131.3, 120.6 (d,  $J$  = 19.0 Hz), 118.4.

**$^{19}\text{F}$  NMR** (376 MHz,  $\text{CDCl}_3$ )  $\delta$  -119.60 (d,  $J$  = 9.0 Hz).

**HRMS:** (+p APCI) calculated for  $[\text{C}_7\text{H}_6\text{N}^{35}\text{ClF}]^+$  158.0167, found 158.0168

**IR**(neat): 3057, 1633, 1593, 1560, 1453, 1420, 1394, 1293, 1208, 1168, 1087, 985, 919, 896, 731, 710 690, 649, 635, 545, 471  $\text{cm}^{-1}$

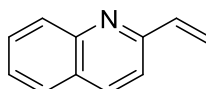

**2-Vinylquinoline (S28).** This compound was prepared according the procedure outlined in **2.2.8.2** from the Suzuki coupling between 2-chloroquinoline (5.0 mmol, 818 mg) and vinylboronic acid pinacol ester (1.2 equiv, 924 mg, 6.0 mmol) in the presence of PAPH (5.0 mol %, 0.25 mmol, 73.1 mg), and  $\text{K}_2\text{CO}_3$  (2.5 equiv, 12.5 mmol, 1.73 g) and  $\text{Pd}_2(\text{dba})_3$  (2.0 mol %, 0.10 mmol, 91.6 mg). After isolation, the product was obtained as a light yellow oil (96% yield, 4.81 mmol, 746 mg). Over time product polymerizes to a dark green liquid even if stored at  $-20^\circ\text{C}$  in the dark. The polymer may be separated from the title compound by short silica-plug through a pipette, eluting with  $\text{CH}_2\text{Cl}_2$  as a yellow solution while the dark colored polymer remains adhered to silica gel. Batches of the title compound either freshly columned or those that contained a high degree of polymer were equally suitable for highly enantioselective cyclopropanation.

**$^1\text{H}$  NMR** (600 MHz,  $\text{CDCl}_3$ )  $\delta$  8.04 (d,  $J$  = 8.5 Hz, 1H), 7.97 (d,  $J$  = 8.6 Hz, 1H), 7.70 (d,  $J$  = 8.4 Hz, 1H), 7.68-7.62 (m, 1H), 7.52 (d,  $J$  = 8.6 Hz, 1H), 7.44 (m, 1H), 7.02 (dd,  $J$  = 17.6, 10.9 Hz, 1H), 6.25 (d,  $J$  = 17.6 Hz, 1H), 5.63 (d,  $J$  = 10.9 Hz, 1H).

**$^{13}\text{C}$  NMR** (126 MHz,  $\text{CDCl}_3$ )  $\delta$  156.0, 148.0, 137.9, 136.3, 129.6, 129.4, 127.5, 126.3, 119.8, 118.4.

**HRMS:** (+p APCI) calculated for  $[\text{C}_{11}\text{H}_{10}\text{N}]^+$  156.0808, found 156.0808

**IR**(neat): 3016, 1738, 1616, 1597, 1504, 1427, 1373, 1339, 1231, 1217, 1097, 991, 926, 834, 764, 715, 699, 616, 472  $\text{cm}^{-1}$

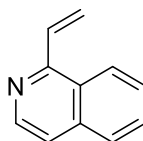

**1-Vinylisoquinoline (S29).** This compound was prepared according to the procedure outlined in **2.2.8.2** from the Suzuki coupling between 1-chloroisoquinoline (5.0 mmol, 818 mg) and vinylboronic acid pinacol ester (1.2 equiv, 924 mg, 6.0 mmol) in the presence of PAPH (5.0 mol %, 0.25 mmol, 73.1 mg), and  $\text{K}_3\text{CO}_3$  (2.5 equiv, 12.5 mmol, 1.73 g) and  $\text{Pd}_2(\text{dba})_3$  (2.0 mol %, 0.10 mmol, 91.6 mg). After isolation, the product was obtained as a light yellow oil which rapidly polymerizes, changing appearance to a dark brown liquid (47% yield, 2.29 mmol, 356 mg). The polymer may be separated from the title compound by short silica-plug through a pipette, eluting with  $\text{CH}_2\text{Cl}_2$  as a yellow solution while the dark colored polymer remains adhered to silica gel. Batches of the title compound either freshly columned or those that contained a high degree of polymer were equally suitable for highly enantioselective cyclopropanation.

**$^1\text{H}$  NMR** (400 MHz,  $\text{CDCl}_3$ )  $\delta$  8.52 (d,  $J$  = 5.6 Hz, 1H), 8.22 (dt,  $J$  = 8.5, 1.1 Hz, 1H), 7.83 – 7.73 (m, 1H), 7.69 – 7.60 (m, 2H), 7.57 (ddd,  $J$  = 13.0, 6.1, 4.2 Hz, 3H), 6.53 (dd,  $J$  = 16.9, 2.0 Hz, 1H), 5.71 (dd,  $J$  = 10.8, 2.0 Hz, 1H).

**$^{13}\text{C}$  NMR** (151 MHz,  $\text{CDCl}_3$ )  $\delta$  154.8, 142.4, 136.6, 132.2, 129.9, 127.2, 127.2, 126.4, 124.6, 121.7, 120.3.

**HRMS:** (+p APCI) calculated for  $[\text{C}_{11}\text{H}_{10}\text{N}]^+$  156.0808, found 156.0809

**IR**(neat): 3048, 1738, 1617, 1579, 1553, 1500, 1414, 1320, 1244, 1217, 1140, 1013, 979, 936, 869, 822, 745, 710, 536  $\text{cm}^{-1}$

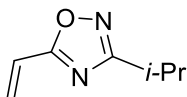

**3-Isopropyl-5-vinyl-1,2,4-oxadiazole (S30).** This compound was prepared according to the procedure outlined in **2.2.9** on 9.8 mmol scale. After isolation, the product was obtained as a clear colorless oil (550 mg, 3.98 mmol, 40% yield over 2 steps)

**<sup>1</sup>H NMR** (400 MHz, CDCl<sub>3</sub>) δ 6.66 (dd, *J* = 17.7, 11.1 Hz, 1H), 6.46 (d, *J* = 17.7 Hz, 1H), 5.91 (d, *J* = 11.1 Hz, 1H), 3.08 (hept, *J* = 6.9 Hz, 1H), 1.33 (d, *J* = 7.0 Hz, 6H).

**<sup>13</sup>C NMR** (151 MHz, CDCl<sub>3</sub>) δ 175.5, 174.2, 128.2, 120.7, 26.7, 20.5.

**HRMS:** (+p APCI) calculated for [C<sub>7</sub>H<sub>11</sub>ON<sub>2</sub> +] 139.0866, found 139.0867

**IR**(neat): 2973, 2934, 1651, 1571, 1547, 1505, 1465, 1415, 1387, 1353, 1310, 1261, 1215, 1164, 1096, 1066, 1024, 1015, 981, 953, 900, 878, 793, 728, 729, 710, 693 cm<sup>-1</sup>

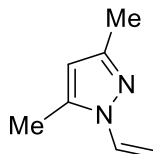

**3,5-Dimethyl-1-vinyl-1H-pyrazole (S31).** This compound was prepared according to the procedure outlined in **2.2.10** on 31 mmol scale. After isolation, the product was obtained as a clear colorless oil (1.8 g, 15 mmol, 47% yield)

**<sup>1</sup>H NMR** (400 MHz, CDCl<sub>3</sub>) δ 6.83 (dd, *J* = 15.4, 8.9 Hz, 1H), 5.82 (s, 1H), 5.55 (d, *J* = 15.4 Hz, 1H), 4.72 (d, *J* = 8.9 Hz, 1H), 2.22 (d, *J* = 1.0 Hz, 6H).

**<sup>13</sup>C NMR** (151 MHz, CDCl<sub>3</sub>) δ 149.8, 139.1, 129.2, 106.8, 99.5, 13.6, 10.9.

**HRMS:** (+p APCI) calculated for [C<sub>7</sub>H<sub>11</sub>N<sub>2</sub> +] 123.0917, found 123.0918

**IR**(neat): 2924, 1720, 1645, 1561, 1446, 1427, 1372, 1344, 1283, 1240, 1119, 1044, 1014, 957, 912, 874, 793, 732, 699, 626 543 cm<sup>-1</sup>

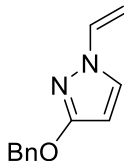

**3-(benzyloxy)-1-vinyl-1H-pyrazole (S32)**

This compound was prepared according to the procedure outlined in **2.2.11** on 5.74 mmol scale. After isolation, the product was obtained as a clear colorless oil (475 mg, 2.372 mmol, 41.3 % yield).

**<sup>1</sup>H NMR** (400 MHz, CDCl<sub>3</sub>) δ 7.49 – 7.42 (m, 2H), 7.42 – 7.27 (m, 4H), 6.81 (dd, *J* = 15.5, 8.8 Hz, 1H), 5.81 (d, *J* = 2.6 Hz, 1H), 5.39 (d, *J* = 15.5 Hz, 1H), 5.25 (s, 2H), 4.67 (d, *J* = 8.8 Hz, 1H);

**<sup>13</sup>C NMR** (101 MHz, CDCl<sub>3</sub>) δ 164.3, 136.9, 132.7, 129.5, 128.5, 128.1, 128.0, 98.1, 93.2, 71.3;

**HRMS** (ESI) *m/z* calculated for [C<sub>12</sub>H<sub>13</sub>N<sub>2</sub>O + H<sup>+</sup>], 201.1022; found 201.1019.

#### 4.1 Characterization of known cyclopropanation products

*\*All products shown with absolute stereo-configuration generated with Rh<sub>2</sub>(S-TPPTTL)<sub>4</sub> (7)*

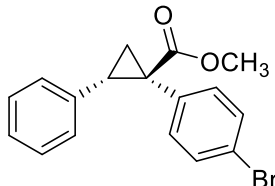

**Methyl (1R,2S)-1-(4-bromophenyl)-2-phenylcyclopropane-1-carboxylate (44)**

This compound was prepared according to **General procedure 3.3** and **General procedure 3.4** from the reaction between **S2** (0.20 mmol, 50 mg) and freshly columned styrene (5.0 equiv, 1.00 mmol, 100 mg). Compound prepared according to **General procedure 3.3** was isolated in 58% yield and 48% ee (0.11 mmol, 38 mg). Compound prepared according to **General procedure 3.4** was isolated in 61% yield and 0% ee (0.12 mmol, 40 mg). After isolation, product was obtained as a white solid.

**<sup>1</sup>H NMR** (400 MHz, CDCl<sub>3</sub>) δ 7.28 – 7.24 (m, 3H), 7.16 – 7.05 (m, 2H), 6.98 – 6.86 (m, 2H), 6.86 – 6.75 (m, 2H), 4.83 (d, *J* = 11.9 Hz, 1H), 4.64 (d, *J* = 11.9 Hz, 1H), 3.22 (dd, *J* = 9.4, 7.5 Hz, 1H), 2.28 (dd, *J* = 9.4, 5.2 Hz, 1H), 1.97 (dd, *J* = 7.5, 5.2 Hz, 1H).

**<sup>13</sup>C NMR** (151 MHz, CDCl<sub>3</sub>) δ 171.7, 135.4, 133.8, 133.1, 131.1, 128.2, 128.2, 127.0, 121.7, 95.1, 74.6, 36.7, 34.1, 20.3.

**Chiral HPLC:** (OJ-H, 30 min, 1 mL/min, 1% *i*-PrOH in *n*-hexane, UV 230 nm) RT: 10.03 min, 14.97 min.

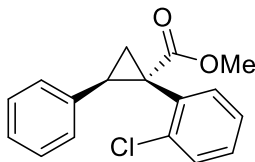

**Methyl (1S,2R)-1-(2-chlorophenyl)-2-phenylcyclopropane-1-carboxylate (41)**

This compound was prepared according to **General procedure 3.3** and **General procedure 3.4** from the reaction between **S5** (0.20 mmol, 42 mg) and freshly columned styrene (5.0 equiv, 1.00 mmol, 100 mg). Compound prepared according to **General procedure 3.3** was isolated in 71% yield and 55% ee (0.14 mmol, 40 mg). Compound prepared according to **General procedure 3.4** was isolated in 79% yield and 84% ee (0.16 mmol, 45 mg). After isolation, enantio-enriched product was obtained as a clear colorless oil.

**<sup>1</sup>H NMR** (400 MHz, CDCl<sub>3</sub>) δ 7.15 (broad m, 4H), 7.08 (m, 3H), 6.87 – 6.76 (dd, *J* = 6.9, 2.0 Hz 2H), 3.70 (s, 3H), 3.34 (t, *J* = 8.4 Hz, 1H), 2.13 (s, 1H), 1.94 (dd, *J* = 7.5, 5.2 Hz, 1H).

**<sup>13</sup>C NMR** (151 MHz, CDCl<sub>3</sub>) δ 173.4, 137.3, 133.3, 129.3, 128.6, 127.9, 129.4, 126.4, 126.1, 64.4, 52.7, 33.3, 25.4, 21.5

**Chiral HPLC:** (OJ-H, 30 min, 1 mL/min, 1% *i*-PrOH in *n*-hexane, UV 230 nm) RT: 12.80 min, 20.73 min

### 4.3 Characterization of novel cyclopropanation products

*\*All products shown with absolute stereo-configuration generated with Rh<sub>2</sub>(S-TPPTTL)<sub>4</sub> (7) or Rh<sub>2</sub>(R-*p*-Ph-TPCP)<sub>4</sub> (6)*

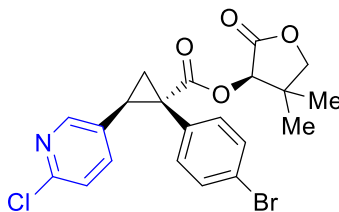

**(R)-4,4-Dimethyl-2-oxotetrahydrofuran-3-yl-(1S,2R)-1-(4-bromophenyl)-2-(6-chloropyridin-3-yl) cyclopropane-1-carboxylate (8)**

This compound was prepared according to **General procedure 3.1** from the reaction between **S17** (0.20 mmol, 71 mg) and **35** (2.0 equiv, 0.40 mmol, 56 mg). After isolation, product was obtained as a light yellow oil in 87% yield and 98% d.e as determined from the crude NMR (0.17 mmol, 81 mg).

**<sup>1</sup>H NMR** (400 MHz, CDCl<sub>3</sub>) δ 8.08 (d, *J* = 2.6 Hz, 1H), 7.40 – 7.31 (m, 2H), 7.05 (d, *J* = 8.3 Hz, 1H), 7.00 – 6.94 (m, 2H), 6.87 (dd, *J* = 8.3, 2.5 Hz, 1H), 5.33 (d, *J* = 6.9 Hz, 1H), 4.01 (s, 2H), 3.28 (dd, *J* = 9.4, 7.3 Hz, 1H), 2.31 (dd, *J* = 9.4, 5.4 Hz, 1H), 1.94 (dd, *J* = 7.3, 5.5 Hz, 1H), 1.19 (s, 3H), 0.89 (s, 3H).

**<sup>13</sup>C NMR** (151 MHz, CDCl<sub>3</sub>) δ 171.8, 171.4, 149.9, 149.7, 137.3, 133.3, 132.1, 131.6, 130.7, 123.5, 122.2, 40.1, 36.9, 29.7, 22.9, 20.8, 19.6.

**HRMS:** (+p APCI) calculated for [C<sub>21</sub>H<sub>20</sub>O<sub>4</sub>N<sup>79</sup>Br<sup>35</sup>Cl<sup>+</sup>] 464.0259, found 464.0258

**IR**(neat): 2970, 1786, 1728, 1587, 1560, 1490, 1464, 1397, 1370, 1352, 1296, 1237, 1216, 1152, 1091, 1071, 1012, 997, 976, 943, 910, 837, 730, 648, 580, 548, 525 cm<sup>-1</sup>

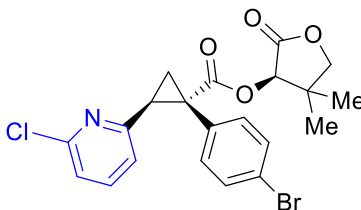

**(R)-4,4-dimethyl-2-oxotetrahydrofuran-3-yl (1S,2S)-1-(4-bromophenyl)-2-(6-chloropyridin-2-yl)cyclopropane -1-carboxylate (9)**

This compound was prepared according to **General procedure 3.1** from the reaction between **S17** (0.20 mmol, 71 mg) and **66** (2.0 equiv, 0.40 mmol, 56 mg). After isolation, product was obtained as a clear colorless oil in 90% yield and 98% d.e as determined from the crude NMR (0.18 mmol, 84 mg)

**<sup>1</sup>H NMR** (400 MHz, CDCl<sub>3</sub>) δ 7.40 (t, *J* = 7.8 Hz, 1H), 7.32 – 7.22 (m, 2H), 7.01 (dd, *J* = 7.9, 0.8 Hz, 1H), 6.99 – 6.93 (m, 2H), 6.88 (dd, *J* = 7.7, 0.8 Hz, 1H), 5.32 (d, *J* = 5.3 Hz, 1H), 3.99 (d, *J* = 1.4 Hz, 2H), 3.44 (dd, *J* = 9.0, 7.1 Hz, 1H), 2.37 (dd, *J* = 7.1, 4.9 Hz, 1H), 2.26 – 2.16 (m, 1H), 1.17 (s, 3H), 0.88 (s, 3H).

**<sup>13</sup>C NMR** (151 MHz, CDCl<sub>3</sub>) δ 171.9, 171.5, 156.3, 150.4, 138.4, 133.2, 132.8, 130.9, 122.1, 121.7, 121.5, 76.1, 75.9, 40.1, 37.4, 33.9, 22.9, 20.3, 19.6.

**HRMS:** (+p APCI) calculated for [C<sub>21</sub>H<sub>20</sub>O<sub>4</sub>N<sup>79</sup>Br<sup>35</sup>Cl<sup>+</sup>] 464.0259, found 464.0262

**IR**(neat): 2967, 1788, 1729, 1584, 1559, 1490, 1464, 1435, 1399, 1377, 1298, 1244, 1152, 1095, 1072, 1031, 1011, 996, 910, 827, 827, 798, 762, 732, 649, 532 cm<sup>-1</sup>

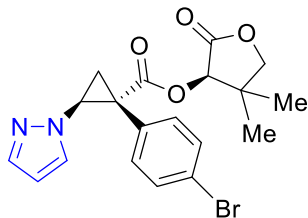

**(R)-4,4-dimethyl-2-oxotetrahydrofuran-3-yl (1R,2S)-1-(4-bromophenyl)-2-(1H-pyrazol-1-yl)cyclopropane-1-carboxylate (10)**

This compound was prepared according to **General procedure 3.1** from the reaction between **S17** (0.20 mmol, 71 mg) and **N-vinyl-pyrazole** (2.0 equiv, 0.40 mmol, 56 mg, Enamine). After isolation, product was obtained as a white waxy solid in 66% yield and 97% d.e as determined from the crude NMR (0.13 mmol, 55 mg).

**MP:** 142-144 °C

**<sup>1</sup>H NMR** (400 MHz, CDCl<sub>3</sub>) δ 7.34 (t, *J* = 1.1 Hz, 1H), 7.29 – 7.19 (m, 3H), 7.17 (d, *J* = 2.4 Hz, 1H), 7.11 – 6.94 (m, 2H), 6.06 (t, *J* = 2.1 Hz, 1H), 5.31 (s, 1H), 4.79 – 4.65 (m, 1H), 3.98 (d, *J* = 1.1 Hz, 2H), 2.48 (d, *J* = 6.1 Hz, 1H), 2.41 – 2.31 (m, 1H), 1.17 (s, 3H), 0.85 (s, 3H).

**<sup>13</sup>C NMR** (151 MHz, CDCl<sub>3</sub>) δ 171.6, 170.4, 140.1, 132.5, 131.4, 131.0, 128.9, 122.1, 106.2, 76.0, 45.9, 40.0, 35.4, 22.9, 19.6, 19.4.

**HRMS:** (+p APCI) calculated for [C<sub>19</sub>H<sub>20</sub>O<sub>4</sub>N<sub>2</sub><sup>79</sup>Br +] 419.0601, found 419.0600

**IR**(neat): 2967, 2930, 1789, 1731, 1518, 1491, 1465, 1398, 1378, 1347, 1251, 1199, 1153, 1098, 1071, 1032, 1012, 996, 859, 762, 733, 721, 647, 614, 543 cm<sup>-1</sup>

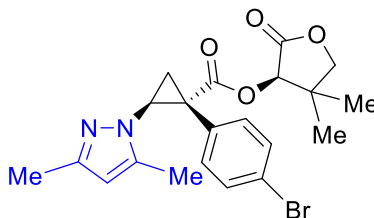

**(R)-4,4-Dimethyl-2-oxotetrahydrofuran-3-yl (1R,2S)-1-(4-bromophenyl)-2-(3,5-dimethyl-1H-pyrazol-1-yl)cyclopropane-1-carboxylate (11)**

This compound was prepared according to **General procedure 3.1** from the reaction between **S17** (0.20 mmol, 71 mg) and **S31** (2.0 equiv, 0.40 mmol, 49 mg). After isolation, product was obtained as a crystalline white solid in 97% yield and 98% d.e as determined from the crude NMR (0.19 mmol, 87 mg).

**MP:** 132-138 °C

**<sup>1</sup>H NMR** (400 MHz, CDCl<sub>3</sub>) δ 7.31 – 7.19 (d, *J* = 8.5 Hz, 2H), 6.99 (d, *J* = 8.5 Hz, 2H), 5.68 (s, 1H), 5.37 (s, 1H), 4.43 (dd, *J* = 8.9, 5.6 Hz, 1H), 4.02 (s, 2H), 2.97 (t, *J* = 5.7 Hz, 1H), 2.41 – 2.31 (m, 3H), 2.29 (dd, *J* = 8.9, 5.9 Hz, 1H), 1.92 (s, 3H), 1.20 (s, 3H), 0.99 (s, 3H).

**<sup>13</sup>C NMR** (151 MHz, CDCl<sub>3</sub>) δ 171.9, 170.5, 147.1, 132.3, 131.3, 130.9, 121.8, 106.6, 76.1, 75.7, 44.0, 40.0, 35.2, 22.9, 19.8, 18.4, 13.1, 11.1.

**HRMS:** (+p APCI) calculated for [C<sub>21</sub>H<sub>24</sub>O<sub>4</sub>N<sub>2</sub><sup>79</sup>Br +] 447.0914, found 447.0916

**IR**(neat): 2970, 1788, 1736, 1560, 1491, 1464, 1370, 1299, 1229, 1217, 1204, 1148, 1127, 1092, 1072, 1011, 997, 913, 851, 790, 763, 731, 719, 647, 578, 541, 528 cm<sup>-1</sup>

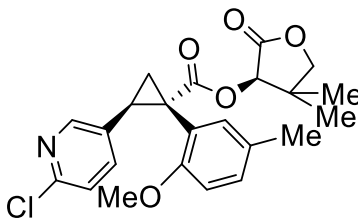

**(R)-4,4-dimethyl-2-oxotetrahydrofuran-3-yl (1S,2R)-2-(6-chloropyridin-3-yl)-1-(2-methoxy-5-methylphenyl)cyclopropane-1-carboxylate (12)**

This compound was prepared according to **General procedure 3.1** from the reaction between **S18** (0.20 mmol, 64 mg) and **35** (2.0 equiv, 0.40 mmol, 56 mg). After isolation the product was obtained as a white solid in 64% yield and 89% d.e as determined from the crude NMR (0.13 mmol, 86 mg)

**<sup>1</sup>H NMR** (400 MHz, CDCl<sub>3</sub>) δ 8.07 (d, *J* = 2.5 Hz, 1H), 7.06 (d, *J* = 2.3 Hz, 1H), 6.98 – 6.89 (m, 2H), 6.86 (dd, *J* = 8.3, 2.5 Hz, 1H), 6.41 (d, *J* = 8.3 Hz, 1H), 5.34 (s, 1H), 3.99 – 3.89 (m, 2H), 3.38 (s, 3H), 3.27 (dd, *J* = 9.3, 7.3 Hz, 1H), 2.25 (s, 3H), 2.09 (dd, *J* = 9.2, 5.4 Hz, 1H), 1.93 (dd, *J* = 7.3, 5.4 Hz, 1H), 1.13 (s, 3H), 0.74 (s, 3H);

**<sup>13</sup>C NMR** (101 MHz, DMSO-d<sub>6</sub>) δ 172.9, 172.4, 156.1, 149.8, 148.3, 138.6, 132.4, 132.0, 129.9, 128.8, 122.8, 122.0, 110.0, 75.7, 75.6, 55.2, 40.2, 34.0, 29.0, 21.8, 20.5, 19.6, 19.1;

**HRMS:** (ESI) *m/z* calculated for C<sub>23</sub>H<sub>25</sub>ClNO<sub>5</sub> [M+H]<sup>+</sup>, 430.1427; found 430.1426.

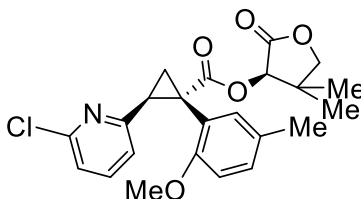

**(R)-4,4-dimethyl-2-oxotetrahydrofuran-3-yl (1S,2S)-2-(6-chloropyridin-2-yl)-1-(2-methoxy-5-methylphenyl)cyclopropane-1-carboxylate (13)**

This compound was prepared according to **General procedure 3.1** from the reaction between **S18** (0.20 mmol, 64 mg) and **66** (2.0 equiv, 0.40 mmol, 56 mg). After isolation the product was obtained as a white solid in 68% yield and 87% d.e as determined from the crude NMR (0.13 mmol, 92 mg)

**<sup>1</sup>H NMR** (400 MHz, CDCl<sub>3</sub>) δ 7.29 (d, J = 7.8 Hz, 1H), 7.10 (d, J = 2.3 Hz, 1H), 6.94 – 6.84 (m, 2H), 6.76 (dd, J = 7.8, 0.9 Hz, 1H), 6.35 (d, J = 8.3 Hz, 1H), 5.33 (s, 1H), 3.97 – 3.89 (m, 2H), 3.45 (dd, J = 9.0, 7.0 Hz, 1H), 3.37 (s, 3H), 2.34 (dd, J = 7.1, 4.9 Hz, 1H), 2.25 (s, 3H), 2.04 (dd, J = 9.0, 4.8 Hz, 1H), 1.13 (s, 3H), 0.76 (s, 3H);

**<sup>13</sup>C NMR** (101 MHz, DMSO-d<sub>6</sub>) δ 172.8, 172.2, 157.1, 156.2, 148.8, 138.8, 132.7, 129.4, 128.4, 122.5, 122.2, 121.8, 109.8, 75.7, 75.6, 55.2, 40.3, 34.6, 33.0, 21.9, 20.5, 19.9, 19.2;

**HRMS** (ESI) m/z calculated for C<sub>23</sub>H<sub>25</sub>ClNO<sub>5</sub> [M+H]<sup>+</sup>, 430.1427; found 430.1430.

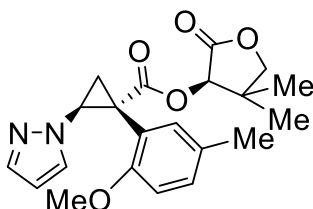

**(R)-4,4-dimethyl-2-oxotetrahydrofuran-3-yl (1R,2S)-1-(2-methoxy-5-methylphenyl)-2-(1H-pyrazol-1-yl)cyclopropane-1-carboxylate (14)**

This compound was prepared according to **General procedure 3.1** from the reaction between **S18** (0.20 mmol, 64 mg) and **N-vinyl pyrazole** (2.0 equiv, 0.40 mmol, 38 mg, Enamine). After isolation the product was obtained as a white foam in 69% yield and 89% d.e as determined from the crude NMR (0.14 mmol, 83 mg)

**<sup>1</sup>H NMR** (400 MHz, CDCl<sub>3</sub>) δ 7.24 (dd, J = 2.4, 0.7 Hz, 1H), 7.20 (dd, J = 1.8, 0.7 Hz, 1H), 6.94 – 6.90 (m, 2H), 6.54 – 6.49 (m, 1H), 6.00 (dd, J = 2.4, 1.8 Hz, 1H), 5.34 (s, 1H), 4.74 (dd, J = 8.7, 5.7 Hz, 1H), 4.01 – 3.88 (m, 2H), 3.67 (s, 3H), 2.64 (t, J = 6.0 Hz, 1H), 2.19 – 2.12 (m, 4H), 1.15 (s, 3H), 0.79 (s, 3H);

**<sup>13</sup>C NMR** (101 MHz, CDCl<sub>3</sub>) δ 172.0, 171.4, 156.3, 138.4, 132.1, 129.8, 129.6, 129.4, 120.7, 109.3, 105.5, 76.0, 75.4, 54.9, 45.2, 40.1, 32.6, 22.7, 20.4, 19.24, 19.21;

**HRMS** (ESI) m/z calculated for C<sub>21</sub>H<sub>25</sub>N<sub>2</sub>O<sub>5</sub> [M+H]<sup>+</sup>, 385.1758; found 385.1767.

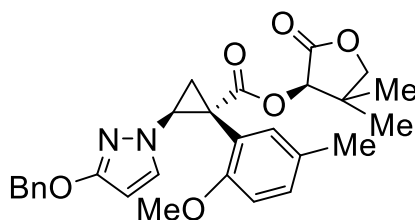

**(R)-4,4-dimethyl-2-oxotetrahydrofuran-3-yl (1R,2S)-2-(3-(benzyloxy)-1H-pyrazol-1-yl)-1-(2-methoxy-5-methylphenyl)cyclopropane-1-carboxylate (15)**

This compound was prepared according to **General procedure 3.1** from the reaction between **S18** (0.20 mmol, 64 mg) and **S32** (2.0 equiv, 0.40 mmol, 80 mg). After isolation the product was obtained as a clear oil in 58% yield and 87% d.e as determined from the crude NMR (0.12 mmol, 89 mg)

**<sup>1</sup>H NMR** (400 MHz, CDCl<sub>3</sub>) δ 7.38 – 7.26 (m, 5H), 7.02 (d, J = 2.5 Hz, 1H), 6.99 – 6.91 (m, 2H), 6.54 (d, J = 8.1 Hz, 1H), 5.43 (d, J = 2.5 Hz, 1H), 5.33 (s, 1H), 5.00 (d, J = 11.9 Hz, 1H), 4.89 (d, J = 12.0 Hz, 1H), 4.58 (dd, J = 8.7, 5.7 Hz, 1H), 3.94 (d, J = 2.2 Hz, 2H), 3.66 (s, 3H), 2.54 (t, J = 5.9 Hz, 1H), 2.18 (s, 3H), 2.10 (dd, J = 8.7, 6.1 Hz, 1H), 1.15 (s, 3H), 0.79 (s, 3H);

**<sup>13</sup>C NMR** (101 MHz, CDCl<sub>3</sub>) δ 172.0, 171.4, 162.0, 156.5, 137.2, 132.2, 131.2, 129.5, 129.2, 128.3, 127.8, 127.7, 121.0, 109.4, 91.4, 76.0, 75.3, 70.7, 54.9, 45.5, 40.1, 32.5, 22.7, 20.4, 19.2, 19.1;

**HRMS** (ESI) m/z calculated for C<sub>28</sub>H<sub>31</sub>N<sub>2</sub>O<sub>6</sub> [M+H]<sup>+</sup>, 491.2177; found 491.2184.

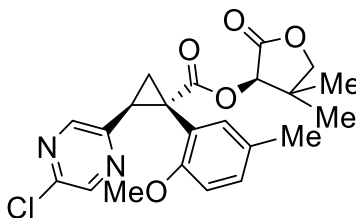

**(R)-4,4-dimethyl-2-oxotetrahydrofuran-3-yl (1S,2S)-2-(5-chloropyrazin-2-yl)-1-(2-methoxy-5-methylphenyl)cyclopropane-1-carboxylate (16)**

This compound was prepared according to **General procedure 3.1** from the reaction between **S18** (0.20 mmol, 64 mg) and **2-chloro-5-ethenyl-pyrimidine** (2.0 equiv, 0.40 mmol, 56 mg, Enamine). After isolation the product was obtained as a white foam in 41% yield and 92% d.e as determined from the crude NMR (0.08 mmol, 56 mg)

**<sup>1</sup>H NMR** (400 MHz, CDCl<sub>3</sub>) δ 8.24 (d, *J* = 1.4 Hz, 1H), 8.04 (d, *J* = 1.3 Hz, 1H), 7.10 (d, *J* = 2.2 Hz, 1H), 6.91 (ddd, *J* = 8.2, 2.3, 0.9 Hz, 1H), 6.35 (d, *J* = 8.3 Hz, 1H), 5.33 (s, 1H), 4.01 – 3.89 (m, 2H), 3.47 (dd, *J* = 8.9, 7.0 Hz, 1H), 3.41 (s, 3H), 2.43 (dd, *J* = 7.0, 4.7 Hz, 1H), 2.25 (s, 3H), 2.07 (dd, *J* = 8.9, 4.7 Hz, 1H), 1.13 (s, 3H), 0.74 (s, 3H);

**<sup>13</sup>C NMR** (101 MHz, CDCl<sub>3</sub>) δ 172.1, 172.0, 155.4, 150.7, 146.4, 144.7, 142.0, 133.0, 129.6, 129.5, 121.5, 108.9, 76.1, 75.5, 53.6, 40.2, 34.9, 30.4, 22.7, 20.5, 20.0, 19.2;

**HRMS** (ESI) *m/z* calculated for C<sub>22</sub>H<sub>24</sub>ClN<sub>2</sub>O<sub>5</sub> [M+H]<sup>+</sup>, 431.1368; found 431.1377.

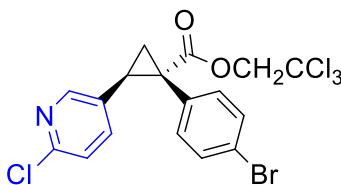

**2,2,2-trichloroethyl (1S,2R)-1-(4-bromophenyl)-2-(6-chloropyridin-3-yl)cyclopropane-1-carboxylate (17)**

This compound was prepared according to **General procedure 3.2** from the reaction between **s1** (0.20 mmol, 74 mg) and **35** (2.32 equiv, 0.46 mmol, 65 mg) with (MeO)<sub>2</sub>CO as solvent in 77% yield and >99% ee (0.15 mmol, 75 mg). After isolation, enantio-enriched product was obtained as an off-white greasy crystalline solid.

**MP:** 136-137 °C

**<sup>1</sup>H NMR** (600 MHz, CDCl<sub>3</sub>) δ 8.05 (d, *J* = 2.5 Hz, 1H), 7.36 – 7.30 (m, 2H), 7.03 (d, *J* = 8.3 Hz, 1H), 6.96 – 6.90 (m, 2H), 6.83 (dd, *J* = 8.4, 2.5 Hz, 1H), 4.84 (d, *J* = 11.9 Hz, 1H), 4.64 (d, *J* = 11.9 Hz, 1H), 3.18 (dd, *J* = 9.4, 7.3 Hz, 1H), 2.34 (dd, *J* = 9.4, 5.5 Hz, 1H), 1.93 (dd, *J* = 7.3, 5.5 Hz, 1H).

**<sup>13</sup>C NMR** (151 MHz, CDCl<sub>3</sub>) δ 171.1, 150.2, 149.9, 137.4, 133.7, 131.9, 131.7, 130.7, 123.7, 122.5, 94.9, 74.8, 37.0, 30.3, 20.5.

**HRMS:** (+p APCI) calculated for [C<sub>17</sub>H<sub>13</sub>O<sub>2</sub>N<sup>79</sup>Br<sup>35</sup>Cl<sub>4</sub>]<sup>+</sup> 481.8878, found 481.8878

**IR**(neat): 2954, 1737, 1587, 1561, 1490, 1464, 1396, 1367, 1349, 1237, 1210, 1156, 1111, 1071, 1057, 1024, 1011, 973, 909, 836, 801, 767, 740, 717, 646, 575, 521 cm<sup>-1</sup>

**Chiral HPLC:** (OD-H, 60 min, 1 mL/min, 1% *i*-PrOH in *n*-hexane, UV 230 nm) RT: 30.65 min, 38.71 min.

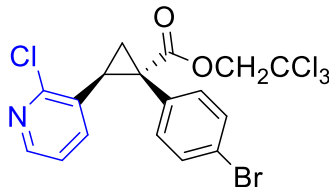

**2,2,2-trichloroethyl (1R,2R)-1-(4-bromophenyl)-2-(2-chloropyridin-3-yl)cyclopropane-1-carboxylate (18)**

This compound was prepared according to **General procedure 3.2** from the reaction between **s1** (0.20 mmol, 74 mg) and **S25** (2.32 equiv, 0.46 mmol, 65 mg) with (MeO)<sub>2</sub>CO as solvent in 70% yield and >99% ee (0.14 mmol, 68 mg). After isolation, enantio-enriched product was obtained as a clear colorless oil.

**<sup>1</sup>H NMR** (400 MHz, CDCl<sub>3</sub>) δ 8.15 (s, 1H), 7.32 – 7.19 (m, 3H), 7.15 – 7.01 (m, 2H), 6.92 (s, 1H), 6.86 (dd, *J* = 7.7, 1.7 Hz, 1H), 4.90 (d, *J* = 11.9 Hz, 1H), 4.67 (d, *J* = 11.9 Hz, 1H), 3.47 (dd, *J* = 9.1, 7.6 Hz, 1H), 2.31 (dd, *J* = 9.2, 5.5 Hz, 1H), 2.07 (dd, *J* = 7.6, 5.5 Hz, 1H).

**<sup>13</sup>C NMR** (151 MHz, CDCl<sub>3</sub>) δ 170.9, 153.2, 147.9, 135.9, 132.8, 132.2, 131.2, 130.5, 122.0, 121.9, 94.7, 74.4, 36.0, 31.2, 18.2.

**HRMS:** (+p APCI) calculated for [C<sub>17</sub>H<sub>13</sub>O<sub>2</sub>N<sup>79</sup>Br<sup>35</sup>Cl<sub>4</sub>]<sup>+</sup> 481.8878, found 481.8884

**IR**(neat): 3016, 2770, 1737, 1564, 1490, 1440, 1409, 1367, 1234, 1193, 1156, 1131, 1091, 1071, 1011, 909, 818, 809, 767, 751, 716, 677, 575, 521 cm<sup>-1</sup>

**Chiral HPLC:** (OD-H, 30 min, 1 mL/min, 1% *i*-PrOH in *n*-hexane, UV 230 nm) RT: 33.41 min, 39.16 min.

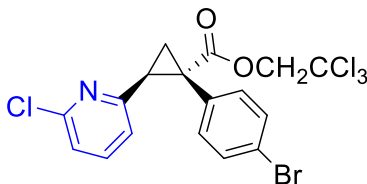

**2,2,2-trichloroethyl (1S,2S)-1-(4-bromophenyl)-2-(6-chloropyridin-2-yl)cyclopropane-1-carboxylate (19)**

This compound was prepared according **General procedure 3.2** from the reaction between **s1** (0.20 mmol, 74 mg) and **66** (2.32 equiv, 0.46 mmol, 65 mg) with CH<sub>2</sub>Cl<sub>2</sub> as solvent in 53% yield and 93% ee (0.11 mmol, 51 mg). After isolation, enantio-enriched product was obtained as a yellow oil.

**<sup>1</sup>H NMR** (400 MHz, CDCl<sub>3</sub>) δ 7.40 (t, *J* = 7.8 Hz, 1H), 7.33 – 7.23 (m, 2H), 7.03 (d, *J* = 7.9 Hz, 1H), 6.98 (d, *J* = 6.5 Hz, 1H), 6.83 (d, *J* = 7.6 Hz, 1H), 4.85 (d, *J* = 11.9 Hz, 1H), 4.64 (d, *J* = 11.9 Hz, 1H), 3.40 (dd, *J* = 9.0, 7.1 Hz, 1H), 2.38 (dd, *J* = 7.1, 4.9 Hz, 1H), 2.28 (dd, *J* = 9.0, 4.9 Hz, 1H).

**<sup>13</sup>C NMR** (151 MHz, CDCl<sub>3</sub>) δ 170.9, 156.1, 150.5, 138.3, 133.3, 132.4, 132.0, 130.8, 129.2, 122.1, 121.6, 121.4, 94.7, 74.5, 37.3, 34.2, 19.7.

**HRMS:** (+p APCI) calculated for [C<sub>17</sub>H<sub>13</sub>O<sub>2</sub>N<sup>79</sup>Br<sup>35</sup>Cl<sub>4</sub>]<sup>+</sup> 481.8878, found 481.8881

**IR**(neat): 2953, 1736, 1584, 1559, 1490, 1434, 1408, 1396, 1378, 1238, 1155, 1096, 1071, 1012, 990, 909, 831, 798, 766, 738, 717, 672, 574, 539 cm<sup>-1</sup>

**Chiral HPLC:** (AD-H, 30 min, 1 mL/min, 1% *i*-PrOH in *n*-hexane, UV 230 nm) RT: 10.71 min, 14.49 min.

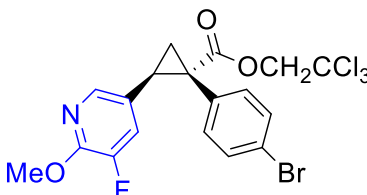

**2,2,2-trichloroethyl (1S,2R)-1-(4-bromophenyl)-2-(5-fluoro-6-methoxypyridin-3-yl)cyclopropane-1-carboxylate (20)**

This compound was prepared according **General procedure 3.2** from the reaction between **s1** (0.20 mmol, 74 mg) and **S26** (2.32 equiv, 0.46 mmol, 71 mg) with CH<sub>2</sub>Cl<sub>2</sub> as solvent in 72% yield and 98% ee (0.14 mmol, 72 mg). After isolation, enantio-enriched product was obtained as a clear colorless oil.

**<sup>1</sup>H NMR** (400 MHz, CDCl<sub>3</sub>) δ 7.59 (d, *J* = 2.0 Hz, 1H), 7.39 – 7.28 (m, 2H), 7.04 – 6.88 (m, 2H), 6.58 (dd, *J* = 11.0, 2.1 Hz, 1H), 4.96 – 4.75 (m, 1H), 4.63 (dd, *J* = 11.9, 0.7 Hz, 1H), 3.94 (d, *J* = 0.9 Hz, 3H), 3.14 (dd, *J* = 9.5, 7.3 Hz, 1H), 2.35 – 2.22 (m, 1H), 1.87 (dd, *J* = 7.3, 5.4 Hz, 1H).

**<sup>13</sup>C NMR** (151 MHz, CDCl<sub>3</sub>) δ 171.1, 152.3 (d, *J* = 11.4 Hz), 147.6, 145.9, 140.9 (d, *J* = 5.7 Hz), 133.4, 132.1, 131.3, 125.2, 122.1, 122.0, 122.0, 94.8, 74.4, 53.7, 36.3, 30.2, 20.0.

**<sup>19</sup>F NMR** (376 MHz, CDCl<sub>3</sub>) δ -139.93 (d, *J* = 10.9 Hz).

**HRMS:** (+p APCI) calculated for [C<sub>18</sub>H<sub>15</sub>O<sub>3</sub>N<sup>79</sup>Br<sup>35</sup>Cl<sub>3</sub>F]<sup>+</sup> 495.9279, found 495.9284

**IR**(neat): 1732, 1617, 1577, 1495, 1443, 1412, 1382, 1315, 1198, 1140, 1197, 1162, 1140, 1091, 1071, 1057, 1011, 970, 907, 850, 827, 806, 779, 766, 718, 649, 622, 573, 546, 526, 500 cm<sup>-1</sup>

**Chiral HPLC:** (OD-H, 30 min, 1 mL/min, 1% *i*-PrOH in *n*-hexane, UV 230 nm) RT: 14.14 min, 23.37 min.

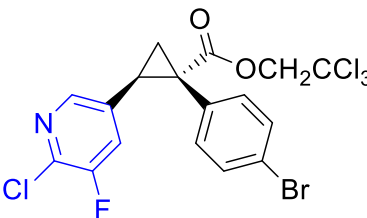

**2,2,2-trichloroethyl (1S,2R)-1-(4-bromophenyl)-2-(6-chloro-5-fluoropyridin-3-yl)cyclopropane-1-carboxylate (21)**

This compound was prepared according to **General procedure 3.2** from the reaction between **s1** (0.20 mmol, 74 mg) and **S27** (2.32 equiv, 0.46 mmol, 73 mg) with CH<sub>2</sub>Cl<sub>2</sub> as solvent in 65% yield and 98% ee (0.13 mmol, 65 mg). After isolation, enantio-enriched product was obtained as a white solid.

**MP:** 109–116 °C

**<sup>1</sup>H NMR** (400 MHz, CDCl<sub>3</sub>) δ 7.87 (d, *J* = 2.1 Hz, 1H), 7.44 – 7.30 (m, 2H), 7.04 – 6.91 (m, 2H), 6.69 (dd, *J* = 9.0, 2.1 Hz, 1H), 4.84 (d, *J* = 11.9 Hz, 1H), 4.64 (d, *J* = 11.8 Hz, 1H), 3.20 (dd, *J* = 9.4, 7.2 Hz, 1H), 2.36 (dd, *J* = 9.4, 5.5 Hz, 1H), 1.92 (dd, *J* = 7.3, 5.5 Hz, 1H).

**<sup>13</sup>C NMR** (151 MHz, CDCl<sub>3</sub>) δ 170.6, 155.0, 153.2, 144.5 (d, *J* = 5.1 Hz), 137.5, 137.4, 133.3, 131.6, 131.3, 123.1, 123.0, 122.5, 94.6, 74.6, 37.0, 29.6, 20.5.

**<sup>19</sup>F NMR** (376 MHz, CDCl<sub>3</sub>) δ -119.18 (d, *J* = 8.9 Hz).

**HRMS:** (+p APCI) calculated for [C<sub>17</sub>H<sub>12</sub>O<sub>2</sub>N<sup>79</sup>Br<sup>35</sup>Cl<sub>4</sub>F]<sup>+</sup> 499.8784, found 499.8786

**IR**(neat): 2955, 1736, 1594, 1568, 1490, 1414, 1381, 1241, 1187, 1152, 1071, 1059, 1012, 970, 904, 828, 807, 767, 728, 717, 573, 542 cm<sup>-1</sup>

**Chiral HPLC:** (OD-H, 60 min, 1 mL/min, 1% *i*-PrOH in *n*-hexane, UV 230 nm) RT: 25.63 min, 39.39 min.

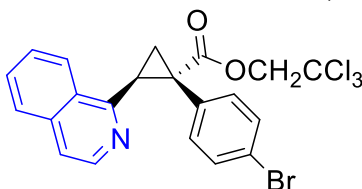

**2,2,2-trichloroethyl (1S,2S)-1-(4-bromophenyl)-2-(isoquinolin-1-yl)cyclopropane-1-carboxylate (22)**

This compound was prepared according to **General procedure 3.2** from the reaction between **s1** (0.20 mmol, 74 mg) and **S29** (2.32 equiv, 0.46 mmol, 72 mg) with CH<sub>2</sub>Cl<sub>2</sub> as solvent in 54% yield and 83% ee (0.11 mmol, 54 mg). After isolation, enantio-enriched product was obtained as a yellow solid.

**MP:** 124–127 °C

**<sup>1</sup>H NMR** (400 MHz, CDCl<sub>3</sub>) δ 8.39 (d, *J* = 8.0 Hz, 1H), 8.11 (d, *J* = 5.7 Hz, 1H), 7.79 (d, *J* = 7.5 Hz, 1H), 7.70 (dd, *J* = 8.7, 6.8 Hz, 2H), 7.47 – 7.30 (m, 1H), 7.15 – 6.96 (m, 2H), 6.88 – 6.68 (m, 2H), 4.96 (d, *J* = 11.9 Hz, 1H), 4.74 (d, *J* = 11.9 Hz, 1H), 4.03 (dd, *J* = 8.9, 7.0 Hz, 1H), 2.98 (s, 1H), 2.31 (dd, *J* = 8.9, 4.4 Hz, 1H).

**<sup>13</sup>C NMR** (151 MHz, CDCl<sub>3</sub>) δ 171.4, 153.8, 141.3, 135.9, 132.6(2 C), 132.6, 130.5(2 C), 130.1, 128.8, 127.7, 127.5, 124.4, 121.3, 119.9, 95.0, 74.3, 37.3, 31.9, 18.4.

**HRMS:** (+p APCI) calculated for [C<sub>21</sub>H<sub>16</sub>O<sub>2</sub>N<sup>79</sup>Br<sup>35</sup>Cl<sub>3</sub>]<sup>+</sup> 497.9424, found 497.9415

**IR**(neat): 1733, 1623, 1585, 1563, 1491, 1407, 1396, 1367, 1311, 1272, 1237, 1197, 1170, 1150, 1095, 1059, 1011, 972, 906, 825, 799, 767, 730, 649, 573, 532 cm<sup>-1</sup>

**Chiral HPLC:** (AD-H, 30 min, 1 mL/min, 1% *i*-PrOH in *n*-hexane, UV 230 nm) RT: 15.62 min, 19.25 min.

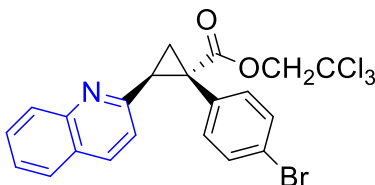

**2,2,2-trichloroethyl (1S,2S)-1-(4-bromophenyl)-2-(quinolin-2-yl)cyclopropane-1-carboxylate (23)**

This compound was prepared according to **General procedure 3.2** from the reaction between **s1** (0.20 mmol, 74 mg) and **S28** (2.32 equiv, 0.46 mmol, 72 mg) with CH<sub>2</sub>Cl<sub>2</sub> as solvent in 56% yield and 87% ee (0.11 mmol, 56 mg). After isolation, enantio-enriched product was obtained as a light yellow oil.

**<sup>1</sup>H NMR** (400 MHz, CDCl<sub>3</sub>) δ 7.88 (dd, *J* = 8.5, 0.8 Hz, 1H), 7.83 – 7.77 (m, 1H), 7.68 (dd, *J* = 8.2, 1.4 Hz, 1H), 7.61 (ddd, *J* = 8.5, 6.9, 1.5 Hz, 1H), 7.44 (ddd, *J* = 8.1, 6.9, 1.2 Hz, 1H), 7.20 – 7.08 (m, 2H), 7.02 – 6.97 (m, 2H), 6.95 (d, *J* = 8.5 Hz, 1H), 4.85 (d, *J* = 11.9 Hz, 1H), 4.66 (d, *J* = 11.9 Hz, 1H), 3.59 (dd, *J* = 9.1, 7.2 Hz, 1H), 2.56 (dd, *J* = 7.2, 4.8 Hz, 1H), 2.35 (dd, *J* = 9.1, 4.8 Hz, 1H).

**<sup>13</sup>C NMR** (151 MHz, CDCl<sub>3</sub>) δ 171.2, 155.3, 147.5, 135.7, 133.3, 132.8, 130.8, 129.5, 128.9, 127.4, 126.6, 126.1, 121.4, 120.8, 94.8, 74.5, 37.5, 35.4, 20.1.

**HRMS:** (+p APCI) calculated for [C<sub>21</sub>H<sub>16</sub>O<sub>2</sub>N<sup>79</sup>Br<sup>35</sup>Cl<sub>3</sub>]<sup>+</sup> 497.9425, found 497.9428

**IR**(neat): 2952, 1736, 1618, 1598, 1505, 1489, 1426, 1366, 1237, 1192, 1155, 1094, 1071, 1012, 988, 909, 834, 758, 732, 719, 575, 527 cm<sup>-1</sup>

**Chiral HPLC:** (AD-H, 90 min, 1 mL/min, 1% *i*-PrOH in *n*-hexane, UV 230 nm) RT: 17.42 min, 54.21 min.

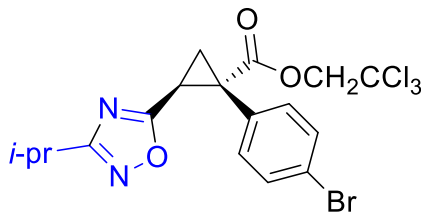

**2,2,2-trichloroethyl (1S,2R)-1-(4-bromophenyl)-2-(3-isopropyl-5-vinyl-1,2,4-oxadiazole)cyclopropane-1-carboxylate (24)**

This compound was prepared according to **General procedure 3.2** from the reaction between **s1** (0.20 mmol, 74 mg) and **S30** (2.32 equiv, 0.46 mmol, 64 mg) with CH<sub>2</sub>Cl<sub>2</sub> as solvent in 96% yield and 89% ee (0.19 mmol, 93 mg). After isolation, enantio-enriched product was obtained as a clear colorless oil.

**<sup>1</sup>H NMR** (400 MHz, CDCl<sub>3</sub>) δ 7.34 (d, *J* = 8.4 Hz, 2H), 7.04 (d, *J* = 8.5 Hz, 2H), 4.83 (d, *J* = 11.9 Hz, 1H), 4.64 (d, *J* = 11.9 Hz, 1H), 3.40 (dd, *J* = 9.0, 6.8 Hz, 1H), 2.87 (hept, *J* = 6.9 Hz, 1H), 2.42 – 2.30 (two overlapped signals, m, 2H), 1.10 (dd, *J* = 6.9, 2.0 Hz, 6H).

**<sup>13</sup>C NMR** (151 MHz, CDCl<sub>3</sub>) δ 174.9, 174.5, 169.8, 132.4, 131.7, 131.3, 122.4, 94.4, 74.7, 36.9, 26.4, 23.6, 20.4, 20.1, 19.9.

**HRMS:** (+p APCI) calculated for [C<sub>17</sub>H<sub>17</sub>O<sub>3</sub>N<sub>2</sub><sup>79</sup>Br<sup>35</sup>Cl<sub>3</sub>]<sup>+</sup> 480.9482, found 480.9484

**IR**(neat): 2970, 1739, 1588, 1489, 1435, 1366, 1230, 1217, 1158, 1094, 1070, 1012, 969, 909, 830, 809, 785, 767, 717, 574, 543, 528 cm<sup>-1</sup>

**Chiral HPLC:** (OJ-H, 30 min, 1 mL/min, 1% *i*-PrOH in *n*-hexane, UV 230 nm) RT: 12.63 min, 15.08 min.

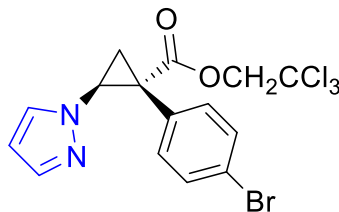

**2,2,2-trichloroethyl (1*R*,2*S*)-1-(4-bromophenyl)-2-(1*H*-pyrazol-1-yl)cyclopropane-1-carboxylate (25)**

This compound was prepared according to **General procedure 3.2** from the reaction between **s1** (0.20 mmol, 74 mg) and **N-vinyl pyrazole** (2.32 equiv, 0.46 mmol, 44 mg) purchased from Enamine with CH<sub>2</sub>Cl<sub>2</sub> as solvent. The reaction had to be conducted with elevated catalyst loading (1.0 mol % Rh<sub>2</sub>(*R*-*p*-Ph-TPCP)<sub>4</sub>, 2.0 μmol, 2.6 mg) and longer reaction time (48 h) to achieve high yield and selectivity, 80% yield and 95% ee (0.16 mmol, 70 mg). After isolation, product was obtained as a white solid.

**MP:** 90-93°C

**<sup>1</sup>H NMR** (400 MHz, CDCl<sub>3</sub>) δ 7.36 (d, *J* = 1.8 Hz, 1H), 7.33 – 7.26 (m, 2H), 7.17 (s, 1H), 7.11 – 6.99 (m, 2H), 6.09 (t, *J* = 2.1 Hz, 1H), 4.89 – 4.78 (m, 1H), 4.72 (dd, *J* = 8.8, 5.8 Hz, 1H), 4.66 (d, *J* = 11.9 Hz, 1H), 2.53 (t, *J* = 6.0 Hz, 1H), 2.42 (dd, *J* = 8.8, 6.3 Hz, 1H).

**<sup>13</sup>C NMR** (151 MHz, CDCl<sub>3</sub>) δ 169.8, 140.1, 132.6, 131.7, 131.0, 128.8, 128.3, 122.2, 106.3, 94.6, 74.7, 74.5, 46.0, 35.5, 18.8.

**HRMS:** (+p APCI) calculated for [C<sub>15</sub>H<sub>13</sub>O<sub>2</sub>N<sub>2</sub><sup>79</sup>Br<sup>35</sup>Cl<sub>3</sub>]<sup>+</sup> 436.9220, found 436.9220

**IR**(neat): 1735, 1593, 1517, 1489, 1448, 1395, 1330, 1242, 1156, 1097, 1071, 1011, 986, 911, 858, 827, 808, 767, 718, 667, 641, 612, 574, 491 cm<sup>-1</sup>

**Chiral HPLC:** (OJ-H, 45 min, 1 mL/min, 1% *i*-PrOH in *n*-hexane, UV 230 nm) RT: 22.60 min, 18.87 min.

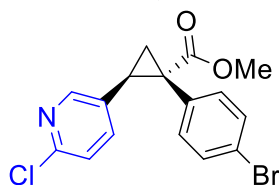

**Methyl (1*S*,2*R*)-1-(4-bromophenyl)-2-(6-chloropyridin-3-yl)cyclopropane-1-carboxylate (26)**

This compound was prepared according to **General procedure 3.2** from the reaction between **s2** (0.20 mmol, 51 mg) and **35** (2.32 equiv, 0.46 mmol, 65 mg) with CH<sub>2</sub>Cl<sub>2</sub> as solvent in 70% yield and 94% ee (0.14 mmol, 51 mg). After isolation, enantio-enriched product was obtained as a white waxy solid.

**MP:** 152-156°C

**<sup>1</sup>H NMR** (400 MHz, CDCl<sub>3</sub>) δ 8.06 (d, *J* = 2.6 Hz, 1H), 7.37 – 7.31 (m, 2H), 7.03 (d, *J* = 8.4 Hz, 1H), 6.96 – 6.84 (m, 2H), 6.80 (dd, *J* = 8.3, 2.6 Hz, 1H), 3.70 (s, 3H), 3.11 (dd, *J* = 9.3, 7.2 Hz, 1H), 2.23 (dd, *J* = 9.4, 5.2 Hz, 1H), 1.82 (dd, *J* = 7.2, 5.2 Hz, 1H).

**<sup>13</sup>C NMR** (151 MHz, CDCl<sub>3</sub>) δ 173.0, 149.7, 149.6, 137.1, 133.4, 132.7, 131.4, 131.1, 123.3, 121.9, 52.9, 37.0, 29.4, 20.3.

**HRMS:** (+p APCI) calculated for [C<sub>16</sub>H<sub>14</sub>O<sub>2</sub>N<sup>79</sup>Br<sup>35</sup>Cl]<sup>+</sup> 365.9891, found 365.9894

**IR**(neat): 2951, 1716, 1587, 1560, 1489, 1464, 1434, 1395, 1349, 1258, 1211, 1193, 1163, 1142, 1111, 1080, 1025, 1011, 967, 910, 863, 834, 801, 766, 739, 647, 629, 573, 522 cm<sup>-1</sup>

**Chiral HPLC:** (AD-H, 60 min, 1 mL/min, 1% *i*-PrOH in *n*-hexane, UV 230 nm) RT: 37.89 min, 46.52 min.

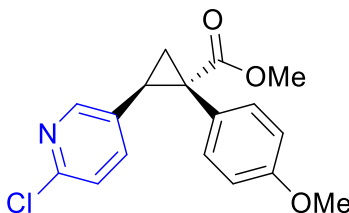

**Methyl (1*S*,2*R*)-2-(6-chloropyridin-3-yl)-1-(4-methoxyphenyl)cyclopropane-1-carboxylate (27)**

This compound was prepared according to **General procedure 3.2** from the reaction between **S7** (0.20 mmol, 41 mg) and **35** (2.32 equiv, 0.46 mmol, 65 mg) with CH<sub>2</sub>Cl<sub>2</sub> as solvent in 70% yield and 89% ee (0.14 mmol, 45 mg). After isolation, enantio-enriched product was obtained as a clear colorless oil.

**<sup>1</sup>H NMR** (400 MHz, CDCl<sub>3</sub>) δ 8.01 (d, *J* = 2.5 Hz, 1H), 6.97 (d, *J* = 8.3 Hz, 1H), 6.95 – 6.90 (m, 2H), 6.75 (dd, *J* = 8.4, 2.6 Hz, 1H), 6.73 – 6.66 (m, 2H), 3.75 (s, 3H), 3.67 (s, 3H), 3.04 (dd, *J* = 9.3, 7.1 Hz, 1H), 2.18 (dd, *J* = 9.3, 5.1 Hz, 1H), 1.78 (dd, *J* = 7.1, 5.1 Hz, 1H), 1.57 (s, 3H).

**<sup>13</sup>C NMR** (151 MHz, CDCl<sub>3</sub>) δ 174.1, 159.0, 149.9, 149.5, 137.4, 133.0, 132.0, 125.7, 123.3, 113.9, 55.3, 53.0, 37.1, 29.7, 21.0.

**HRMS:** (+p APCI) calculated for [C<sub>17</sub>H<sub>17</sub>O<sub>3</sub>N<sup>35</sup>Cl]<sup>+</sup> 318.0891, found 318.0885

**IR**(neat): 2952, 1717, 1612, 1584, 1560, 1516, 1463, 1435, 1349, 1264, 1247, 1211, 1176, 1163, 1109, 1031, 967, 835, 803, 756, 745, 653, 632, 604, 537, cm<sup>-1</sup>

**Chiral HPLC:** (AD-H, 30 min, 1 mL/min, 3% *i*-PrOH in *n*-hexane, UV 230 nm) RT: 19.34 min, 21.92 min.

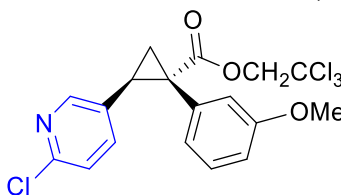

**2,2,2-trichloroethyl (1S,2R)-2-(6-chloropyridin-3-yl)-1-(3-methoxyphenyl)cyclopropane-1-carboxylate (28)**

This compound was prepared according to **General procedure 3.2** from the reaction between **S8** (0.20 mmol, 65 mg) and **35** (2.32 equiv, 0.46 mmol, 65 mg) with CH<sub>2</sub>Cl<sub>2</sub> as solvent in 65% yield and 95% ee (0.13 mmol, 55 mg). After isolation, enantio-enriched product was obtained as a clear colorless oil.

**<sup>1</sup>H NMR** (400 MHz, CDCl<sub>3</sub>) δ 8.05 (d, *J* = 2.6 Hz, 1H), 7.10 (t, *J* = 7.9 Hz, 1H), 6.99 (d, *J* = 8.3 Hz, 1H), 6.83 (dd, *J* = 8.3, 2.6 Hz, 1H), 6.73 (ddt, *J* = 8.3, 2.6, 0.8 Hz, 1H), 6.65 (ddt, *J* = 7.7, 1.6, 0.7 Hz, 1H), 6.63 – 6.56 (m, 1H), 4.86 (dd, *J* = 12.0, 0.6 Hz, 1H), 4.63 (dd, *J* = 11.9, 0.6 Hz, 1H), 3.67 (d, *J* = 0.5 Hz, 3H), 3.16 (dd, *J* = 9.4, 7.2 Hz, 1H), 2.47 – 2.16 (m, 1H), 1.95 (dd, *J* = 7.2, 5.3 Hz, 1H).

**<sup>13</sup>C NMR** (151 MHz, CDCl<sub>3</sub>) δ 171.5, 159.5, 149.9, 149.8, 137.4, 134.1, 131.2, 129.4, 124.5, 123.4, 117.8, 113.7, 95.0, 74.6, 55.3, 37.6, 30.2, 20.7.

**HRMS:** (+p APCI) calculated for [C<sub>18</sub>H<sub>16</sub>O<sub>3</sub>N<sup>35</sup>Cl<sub>4</sub>]<sup>+</sup> 433.9878, found 433.9881

**IR**(neat): 2954, 1733, 1601, 1585, 1561, 1494, 1463, 1435, 1367, 1347, 1288, 1238, 1208, 1153, 1110, 1046, 978, 910, 803, 753, 736, 713, 700, 573 cm<sup>-1</sup>

**Chiral HPLC:** (AD-H, 30 min, 1 mL/min, 5% *i*-PrOH in *n*-hexane, UV 230 nm) RT: 12.15 min, 14.45 min.

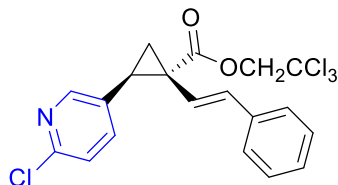

**2,2,2-trichloroethyl (1R,2R)-2-(6-chloropyridin-3-yl)-1-((E)-styryl)cyclopropane-1-carboxylate (29)**

This compound was prepared according to **General procedure 3.2** from the reaction between **S9** (0.20 mmol, 64 mg) and **35** (2.32 equiv, 0.46 mmol, 65 mg) with CH<sub>2</sub>Cl<sub>2</sub> as solvent in 67% yield and 98% ee (0.13 mmol, 57 mg). After isolation, enantio-enriched product was obtained as a yellow oil.

**<sup>1</sup>H NMR** (400 MHz, CDCl<sub>3</sub>) δ 8.28 (s, 1H), 7.38 (dd, *J* = 8.3, 2.2 Hz, 1H), 7.33 – 7.25 (m, 3H), 7.25 – 7.11 (m, 3H), 6.45 (d, *J* = 16.0 Hz, 1H), 6.19 (d, *J* = 16.0 Hz, 1H), 4.95 – 4.77 (m, 2H), 3.09 (dd, *J* = 9.3, 7.3 Hz, 1H), 2.25 (ddd, *J* = 9.3, 5.5, 0.8 Hz, 1H), 1.94 (dd, *J* = 7.3, 5.5 Hz, 1H).

**<sup>13</sup>C NMR** (151 MHz, CDCl<sub>3</sub>) δ 171.2, 150.4, 150.1, 138.9, 136.1, 134.9, 130.1, 128.6 (2 C), 128.0, 126.3 (2 C), 123.6, 121.5, 94.9, 74.5, 33.2, 31.7, 18.4.

**HRMS:** (+p APCI) calculated for [C<sub>19</sub>H<sub>16</sub>O<sub>2</sub>N<sup>35</sup>Cl<sub>4</sub>]<sup>+</sup> 429.9929, found 429.9934

**IR**(neat): 3026, 2970, 1736, 2586, 1560, 1493, 1463, 1448, 1365, 1230, 1217, 1131, 1109, 1059, 966, 910, 835, 806, 783, 746, 718, 694, 646, 633, 572, 528 cm<sup>-1</sup>

**Chiral HPLC:** (AD-H, 30 min, 1 mL/min, 3% *i*-PrOH in *n*-hexane, UV 230 nm) RT: 16.04 min, 20.66 min.

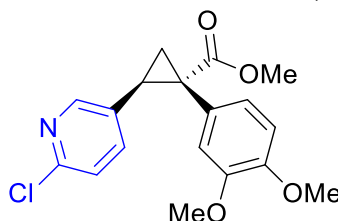

**Methyl (1S,2R)-2-(6-chloropyridin-3-yl)-1-(3,4-dimethoxyphenyl)cyclopropane-1-carboxylate (30)**

This compound was prepared according to **General procedure 3.2** from the reaction between **S6** (0.20 mmol, 47 mg) and **35** (2.32 equiv, 0.46 mmol, 65 mg) with CH<sub>2</sub>Cl<sub>2</sub> as solvent in 60% yield and 71% ee (0.12 mmol, 41 mg). After isolation, enantio-enriched product was obtained as a clear colorless oil.

**<sup>1</sup>H NMR** (400 MHz, CDCl<sub>3</sub>) δ 8.08 (s, 1H), 6.97 (d, *J* = 8.3 Hz, 1H), 6.73 (dd, *J* = 8.1, 2.6 Hz, 1H), 6.70 (d, *J* = 8.2 Hz, 1H), 6.63 (dd, *J* = 8.3, 2.0 Hz, 1H), 6.43 (s, 1H), 3.83 (s, 3H), 3.69 (s, 3H), 3.66 (s, 3H), 3.05 (dd, *J* = 9.2, 7.1 Hz, 1H), 2.19 (dd, *J* = 9.4, 5.0 Hz, 1H), 1.79 (dd, *J* = 7.1, 5.1 Hz, 1H).

**<sup>13</sup>C NMR** (151 MHz, CDCl<sub>3</sub>) δ 173.8, 149.7, 149.4, 148.4, 148.4, 136.9, 131.8, 125.9, 124.1, 123.1, 115.0, 110.6, 55.8, 55.7, 52.8, 37.3, 29.4, 20.9.

**HRMS:** (+p APCI) calculated for [C<sub>18</sub>H<sub>19</sub>O<sub>4</sub>N<sup>35</sup>Cl]<sup>+</sup> 348.0997, found 348.0996

**IR**(neat): 3003, 2969, 2950, 1737, 1721, 1587, 1551, 1517, 1462, 1435, 1414, 1365, 1352, 1252, 1227, 1217, 1157, 1140, 1108, 1026, 908, 742, 658, 528 cm<sup>-1</sup>

**Chiral HPLC:** (AD-H, 60 min, 1 mL/min, 3% *i*-PrOH in *n*-hexane, UV 230 nm) RT: 32.96 min, 45.12 min.

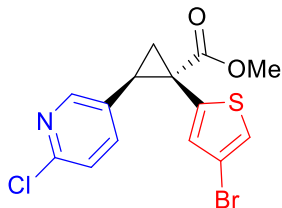

**Methyl (1*R*,2*R*)-1-(4-bromothiophen-2-yl)-2-(6-chloropyridin-3-yl)cyclopropane-1-carboxylate (31)**

This compound was prepared according **General procedure 3.2** from the reaction between **S16** (0.20 mmol, 52 mg) and **35** (2.32 equiv, 0.46 mmol, 65 mg) with CH<sub>2</sub>Cl<sub>2</sub> as solvent in 98% yield and 95% ee (0.20 mmol, 73 mg). After isolation, enantio-enriched product was obtained as a light brown solid.

**MP:** 126-127 °C

**<sup>1</sup>H NMR** (400 MHz, CDCl<sub>3</sub>) δ 8.11 (dt, *J* = 2.5, 0.7 Hz, 1H), 7.10 (dd, *J* = 8.3, 0.8 Hz, 1H), 7.06 (dd, *J* = 2.5, 0.5 Hz, 1H), 7.03 (d, *J* = 1.5 Hz, 1H), 6.69 (d, *J* = 1.5 Hz, 1H), 3.74 (s, 3H), 3.13 (dd, *J* = 9.3, 7.4 Hz, 1H), 2.28 (dd, *J* = 9.3, 5.3 Hz, 1H), 1.95 (dd, *J* = 7.4, 5.3 Hz, 1H).

**<sup>13</sup>C NMR** (151 MHz, CDCl<sub>3</sub>) δ 172.2, 150.4, 149.9, 138.8, 137.6, 132.3, 130.5, 124.2, 123.7, 108.9, 53.4, 32.1, 31.3, 22.0.

**HRMS:** (+p APCI) calculated for [C<sub>14</sub>H<sub>12</sub>O<sub>2</sub>N<sup>79</sup>Br<sup>35</sup>Cl<sup>32</sup>S<sup>+</sup>] 371.9455, found 371.9458

**IR**(neat): 3105, 2951, 1720, 1586, 1561, 1528, 1464, 1434, 1348, 1265, 1208, 1155, 1108, 1023, 963, 915, 881, 836, 799, 733, 678, 633, 604, 563 cm<sup>-1</sup>

**Chiral HPLC:** (OD-H, 60 min, 1 mL/min, 1% *i*-PrOH in *n*-hexane, UV 230 nm) RT: 43.1 min, 50.5 min.

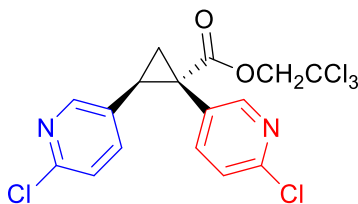

**2,2,2-trichloroethyl (1*S*,2*R*)-1,2-bis(6-chloropyridin-3-yl)cyclopropane-1-carboxylate (32)**

This compound was prepared according to **General procedure 3.2** from the reaction between **S3** (0.20 mmol, 66 mg) and **35** (2.32 equiv, 0.46 mmol, 65 mg) with CH<sub>2</sub>Cl<sub>2</sub> as solvent in 73% yield and 97% ee (0.15 mmol, 64 mg). After isolation, enantio-enriched product was obtained as a crystalline yellow solid.

**MP:** 88-89 °C

**<sup>1</sup>H NMR** (400 MHz, CDCl<sub>3</sub>) δ 8.19 (d, *J* = 2.5 Hz, 1H), 8.09 (d, *J* = 2.6 Hz, 1H), 7.34 (dd, *J* = 8.3, 2.5 Hz, 1H), 7.23 – 7.15 (m, 1H), 7.11 (d, *J* = 8.3 Hz, 1H), 6.94 (dd, *J* = 8.3, 2.6 Hz, 1H), 4.87 (d, *J* = 11.9 Hz, 1H), 4.67 (d, *J* = 11.9 Hz, 1H), 3.26 (dd, *J* = 9.5, 7.4 Hz, 1H), 2.44 (dd, *J* = 9.4, 5.7 Hz, 1H), 2.03 (dd, *J* = 7.4, 5.7 Hz, 1H).

**<sup>13</sup>C NMR** (151 MHz, CDCl<sub>3</sub>) δ 170.1, 152.2, 151.0, 150.4, 149.6, 142.3, 137.5, 129.6, 128.0, 123.9, 94.5, 74.6, 34.1, 30.0, 19.4.

**HRMS:** (+p APCI) calculated for [C<sub>16</sub>H<sub>12</sub>O<sub>2</sub>N<sub>2</sub><sup>35</sup>Cl<sub>5</sub><sup>+</sup>] 438.9335, found 438.9337

**IR**(neat): 3016, 2970, 1738, 1587, 1560, 1463, 1366, 1230, 1217, 1162, 1113, 1060, 1022, 912, 839, 812, 779, 749, 528 cm<sup>-1</sup>

**Chiral HPLC:** (AD-H, 60 min, 1 mL/min, 7% *i*-PrOH in *n*-hexane, UV 230 nm) RT: 36.61 min, 44.71 min.

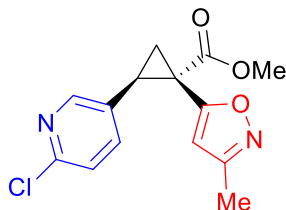

**Methyl (1*S*,2*R*)-2-(6-chloropyridin-3-yl)-1-(3-methylisoxazol-5-yl)cyclopropane-1-carboxylate (33)**

This compound was prepared according **General procedure 3.2** from the reaction between **S13** (0.20 mmol, 36 mg) and **35** (2.32 equiv, 0.46 mmol, 65 mg) with CH<sub>2</sub>Cl<sub>2</sub> as solvent in 60% yield and 83% ee (0.12 mmol, 35 mg). After isolation, enantio-enriched product was obtained as a clear colorless oil.

**<sup>1</sup>H NMR** (600 MHz, CDCl<sub>3</sub>) δ 8.13 (dt, *J* = 2.6, 0.7 Hz, 1H), 7.24 (ddd, *J* = 8.3, 2.5, 0.6 Hz, 1H), 7.12 (dd, *J* = 8.4, 0.8 Hz, 1H), 5.91 (s, 1H), 3.76 (s, 3H), 3.18 (dd, *J* = 9.2, 7.8 Hz, 1H), 2.24 – 2.20 (m, 1H), 2.20 – 2.16 (m, 1H), 2.15 (s, 3H).

**<sup>13</sup>C NMR** (151 MHz, CDCl<sub>3</sub>) δ 170.6, 165.3, 160.1, 150.6, 150.0, 138.2, 129.9, 123.9, 106.8, 53.3, 31.2, 29.3, 19.9, 11.6

**HRMS:** (+p APCI) calculated for [C<sub>14</sub>H<sub>14</sub>O<sub>3</sub>N<sub>2</sub><sup>35</sup>Cl<sup>+</sup>] 293.0687, found 293.0687

**IR**(neat): 2954, 1725, 1612, 1588, 1561, 1463, 1435, 1414, 1351, 1319, 1265, 1219, 1200, 1157, 1108, 1077, 1024, 1008, 986, 964, 914, 835, 799, 761, 736, 696, 645, 633, 561, 458 cm<sup>-1</sup>

**Chiral HPLC:** (OD-H, 60 min, 1 mL/min, 3% *i*-PrOH in *n*-hexane, UV 230 nm) RT: 39.76 min, 51.41 min.

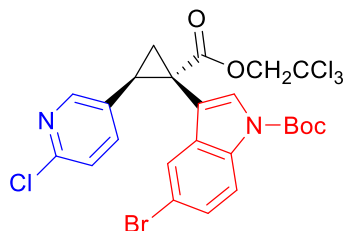

**Tert-butyl 5-bromo-3-((1S,2R)-2-(6-chloropyridin-3-yl)-1-((2,2,2-trichloroethoxy)carbonyl)cyclopropyl)-1H-indole-1-carboxylate (34)**

This compound was prepared according to the procedure outlined in **3.2.1**. After isolation, enantio-enriched product was obtained as a brown oil in 82% yield and 89% ee (0.16 mmol, 102 mg).

**<sup>1</sup>H NMR** (400 MHz, CDCl<sub>3</sub>) δ 8.04 (s, 1H), 7.87 (d, *J* = 8.8 Hz, 1H), 7.44 (s, 1H), 7.30 (dd, *J* = 8.8, 2.0 Hz, 1H), 7.25 – 7.14 (m, 1H), 7.02 (d, *J* = 8.3 Hz, 1H), 4.87 (d, *J* = 11.9 Hz, 1H), 4.65 (d, *J* = 11.9 Hz, 1H), 3.28 (dd, *J* = 9.4, 7.3 Hz, 1H), 2.36 (dd, *J* = 9.4, 5.2 Hz, 1H), 2.00 (dd, *J* = 7.4, 5.2 Hz, 1H), 1.63 (s, 9H).

**<sup>13</sup>C NMR** (151 MHz, CDCl<sub>3</sub>) δ 170.8, 150.0, 148.9, 138.2, 133.8, 131.5, 130.3, 128.1, 127.5, 123.2, 122.5, 116.6, 116.0, 113.0, 94.6, 84.6, 74.5, 29.7, 28.1 (3 C), 20.0.

**HRMS:** (+p APCI) calculated for [C<sub>24</sub>H<sub>22</sub>O<sub>4</sub>N<sub>2</sub><sup>79</sup>Br<sup>35</sup>Cl<sub>4</sub>]<sup>+</sup> 620.9511, found 620.9509

**IR**(neat): 2980, 1732, 1587, 1561, 1451, 1371, 1304, 1274, 1240, 1215, 1197, 1152, 1121, 1055, 1026, 961, 908, 839, 801, 789, 765, 731, 648, 636, 572 cm<sup>-1</sup>

**Chiral HPLC:** (OD-H, 30 min, 1 mL/min, 3% *i*-PrOH in *n*-hexane, UV 230 nm) RT: 15.17 min, 21.87 min.

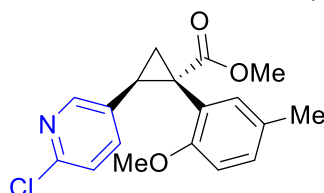

**Methyl (1S,2R)-2-(6-chloropyridin-3-yl)-1-(2-methoxy-5-methylphenyl)cyclopropane-1-carboxylate (37)**

This compound was prepared according to **General procedure 3.2**, **General procedure 3.3**, **General procedure 3.4**, **General procedure 3.5**, and **General procedure 3.6** from the reaction between **35** and **36** with varying levels of enantioselectivity depending on the method and conditions used. **General procedure 3.2:** **36** (0.20 mmol, 44 mg) and **35** (2.32 equiv, 0.46 mmol, 65 mg) with CH<sub>2</sub>Cl<sub>2</sub> as solvent in 22% yield and 22% ee (0.04 mmol, 15 mg). **General procedure 3.3:** **36** (0.20 mmol, 44 mg) and **35** (5.0 equiv, 1.00 mmol, 160 mg) in 95% yield and 98% ee (0.19 mmol, 63 mg). **General procedure 3.4:** **36** (0.20 mmol, 44 mg) and **35** (1.5 equiv, 0.30 mmol, 42 mg) with CH<sub>2</sub>Cl<sub>2</sub> as solvent in 87% yield and 98% ee (0.17 mmol, 58 mg). **General procedure 3.5:** **36** (0.20 mmol, 44 mg) and **35** (1.5 equiv, 0.30 mmol, 42 mg) with CH<sub>2</sub>Cl<sub>2</sub> as solvent in 89% yield and 98% ee (0.18 mmol, 59 mg). Only optimized results for each procedure are reported here, enantioselectivity data corresponding to other variants in Table 1 and Table 2 may be found in section 5.3. **General procedure 3.6:** Reaction was performed according to the described procedure and **37** was obtained in 83% yield over two steps and 98% ee. After isolation, enantio-enriched product was obtained as a clear colorless oil, racemate is obtained as colorless orthorhombic crystals.

**MP:** 126-127 °C

**<sup>1</sup>H NMR** (600 MHz, CDCl<sub>3</sub>) δ 8.00 (d, *J* = 2.53 Hz, 1H), 6.98 (s, 1H), 6.94 (d, *J* = 8.19 Hz, 1H), 6.89 (d, *J* = 8.23 Hz, 1H), 6.81 (dd, *J* = 2.51, 8.33 Hz, 1H), 6.44 (d, *J* = 8.24 Hz, 1H), 3.63 (s, 3H), 3.37 (s, 3H), 3.17 (m, 1H), 2.23 (s, 3H), 1.98 (m, 1H), 1.78 (m, 1H).

**<sup>13</sup>C NMR** (151 MHz, CDCl<sub>3</sub>) δ 173.8, 156.2, 149.6, 148.8, 136.6, 131.9, 129.7, 129.3, 122.3, 110.2, 55.0, 52.6, 34.1, 28.7, 25.3, 20.4, 20.0

**HRMS:** (+p APCI) calculated for [C<sub>18</sub>H<sub>19</sub>O<sub>3</sub>N<sup>35</sup>Cl]<sup>+</sup> 332.1048, found 332.1046

**IR**(neat): 1716, 1562, 1501, 1461, 1434, 1348, 1262, 1241, 1158, 1140, 1107, 1029, 972, 905, 808, 732, 671, 548 cm<sup>-1</sup>

**Chiral HPLC:** (OD-H, 30 min, 1 mL/min, 1% *i*-PrOH in *n*-hexane, UV 230 nm) RT: 19.46 min, 22.97 min.

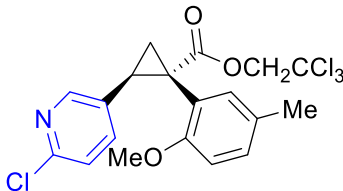

**2,2,2-Trichloroethyl (1S,2R)-2-(6-chloropyridin-3-yl)-1-(2-methoxy-5-methylphenyl)cyclopropane-1-carboxylate (Table 2, entry 7)**

This compound was prepared according to **General procedure 3.3** from the reaction between **2,2,2-Trichloroethyl-1-(2-methoxy-5-methylphenyl)-1-carboxylate** (0.20 mmol, 70 mg) and **35** (5.0 equiv, 1.00 mmol, 140 mg) in 47% yield and 39% ee (0.09 mmol, 44 mg). After isolation, enantio-enriched product was obtained as a clear colorless oil.

**<sup>1</sup>H NMR** (400 MHz, CDCl<sub>3</sub>) δ 8.04 (d, *J* = 2.5 Hz, 1H), 7.08 – 6.82 (m, 4H), 6.44 (d, *J* = 8.3 Hz, 1H), 4.88 (d, *J* = 11.9 Hz, 1H), 4.57 (d, *J* = 11.9 Hz, 1H), 3.40 (s, 3H), 3.26 (dd, *J* = 9.3, 7.3 Hz, 1H), 2.25 (s, 3H), 2.13 (dd, *J* = 9.3, 5.4 Hz, 1H), 1.92 (dd, *J* = 7.3, 5.4 Hz, 1H).

**<sup>13</sup>C NMR** (151 MHz, CDCl<sub>3</sub>) δ 171.5, 156.1, 149.6, 149.0, 136.8, 131.9, 131.4, 130.0, 129.2, 122.4, 121.2, 109.9, 94.9, 74.4, 54.8, 34.0, 29.2, 20.5, 20.1.

**HRMS:** (+p APCI) calculated for [C<sub>19</sub>H<sub>18</sub>O<sub>3</sub>N<sup>35</sup>Cl<sub>4</sub>]<sup>+</sup> 448.0035, found 448.0033

**IR**(neat): 2925, 1736, 1613, 1587, 1562, 1503, 1462, 1367, 1239, 1138, 1108, 1058, 1034, 978, 911, 805, 767, 726, 572 cm<sup>-1</sup>

**Chiral HPLC:** (AD-H, 60 min, 1 mL/min, 0.5 % *i*-PrOH in *n*-hexane, UV 230 nm) RT: 37.07 min, 40.77 min.

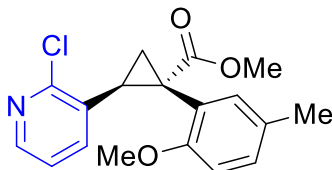

**Methyl (1S,2S)-2-(2-chloropyridin-3-yl)-1-(2-methoxy-5-methylphenyl)cyclopropane-1-carboxylate (38)**

This compound was prepared according to **General procedure 3.3**, **General procedure 3.4**, and **General procedure 3.5** from the reaction between **S25** and **36**. **General procedure 3.3:** **36** (0.20 mmol, 44 mg) and **S25** (5.0 equiv, 1.00 mmol, 160 mg) in 85% yield and 95% ee (0.17 mmol, 56 mg) **General procedure 3.5:** **36** (0.20 mmol, 44 mg) and **S25** (1.5 equiv, 0.30 mmol, 42 mg) in 62% yield and 90% ee (0.12 mmol, 41 mg). After isolation, enantio-enriched product was obtained as a white solid.

**MP:** 143-152 °C

**<sup>1</sup>H NMR** (600 MHz, CDCl<sub>3</sub>) δ 8.03 (dd, *J*=1.94, 4.73, 1H), 7.01 (t, *J*=3.70, 1H), 6.93 (d, *J*=8.460, 1H), 6.72 (dd, *J*=4.67, 7.66), 6.47 (d, *J*=1.94, 1H), 6.40 (d, *J*=8.15, 1H), 3.67 (s, 3H), 3.63 (m, 1H), 3.38 (s, 3H), 2.25 (s, 3H), 2.05 (m, 1H), 1.84 (m, 1H)

**<sup>13</sup>C NMR** (151 MHz, CDCl<sub>3</sub>) δ 173.5, 156.4, 153.2, 146.3, 133.8, 132.5, 131.7, 129.5, 128.9, 122.4, 120.8, 109.8, 54.8, 52.6, 34.4, 28.5, 20.4, 19.9.

**HRMS:** (+p APCI) calculated for [C<sub>18</sub>H<sub>19</sub>O<sub>3</sub>N<sup>35</sup>Cl +] 332.1048, found 332.1048

**IR**(neat): 2919, 1720, 1585, 1557, 1433, 1264, 1244, 1158, 1140, 1034, 910, 800, 733 cm<sup>-1</sup>

**Chiral HPLC:** (OD-H, 30 min, 1 mL/min, 1% *i*-PrOH in *n*-hexane, UV 230 nm) RT: 12.44 min, 22.31 min.

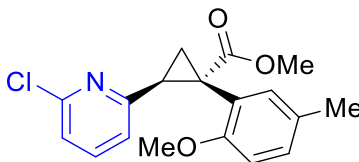

**Methyl (1S,2S)-2-(6-chloropyridin-2-yl)-1-(2-methoxy-5-methylphenyl)cyclopropane-1-carboxylate (39)**

This compound was prepared according to **General procedure 3.3**, **General procedure 3.4**, and **General procedure 3.5** from the reaction between **66** and **36**. **General procedure 3.3:** **36** (0.20 mmol, 44 mg) and **66** (5.0 equiv, 1.00 mmol, 160 mg) in 86% yield and 90% ee (0.17 mmol, 57 mg), **General procedure 3.5:** **36** (0.20 mmol, 44 mg) and **66** (1.5 equiv, 0.30 mmol, 42 mg) in 81% yield and >99% ee (0.16 mmol, 54 mg). After isolation, enantio-enriched product was obtained as a white solid.

**MP:** 114-116 °C

**<sup>1</sup>H NMR** (400 MHz, CDCl<sub>3</sub>) δ 7.31 – 7.16 (m, 2H), 7.02 (d, *J* = 2.3 Hz, 1H), 6.91 (ddd, *J* = 7.7, 5.6, 1.3 Hz, 2H), 6.74 (dd, *J* = 7.6, 0.8 Hz, 1H), 6.41 (d, *J* = 8.3 Hz, 1H), 3.64 (s, 3H), 3.44 – 3.31 (buried m under main s, 4H), 2.28 – 2.17 (buried m under main s, 4H), 1.96 (dd, *J* = 8.9, 4.7 Hz, 1H).

**<sup>13</sup>C NMR** (151 MHz, CDCl<sub>3</sub>) δ 173.8, 157.9, 156.3, 149.5, 137.2, 132.6, 129.0, 128.9, 122.7, 121.0, 121.0, 109.6, 55.0, 52.5, 34.8, 32.9, 29.7, 20.4

**HRMS:** (+p APCI) calculated for [C<sub>18</sub>H<sub>19</sub>O<sub>3</sub>N<sup>35</sup>Cl +] 332.1048, found 332.1044

**IR**(neat): 2916, 2849, 1721, 1585, 1557, 1502, 1433, 1376, 1263, 1242, 1158, 1141, 1033, 910, 800, 720 cm<sup>-1</sup>

**Chiral HPLC:** (OD-H, 60 min, 1 mL/min, 1% *i*-PrOH in *n*-hexane, UV 230 nm) RT: 22.93 min, 36.26 min.

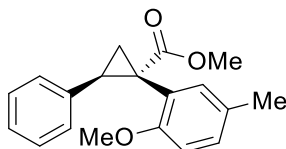

**Methyl (1S,2R)-1-(2-methoxy-5-methylphenyl)-2-phenylcyclopropane-1-carboxylate (40)**

This compound was prepared according to **General procedure 3.3** and **General procedure 3.4** from the reaction between **36** and freshly columned styrene. **General procedure 3.3:** **36** (0.20 mmol, 44 mg) and styrene (5.0 equiv, 1.00 mmol, 100 mg) in 81% yield and 4% ee (0.16 mmol, 48 mg) **General procedure 3.4:** **36** (0.20 mmol, 44 mg) and styrene (5.0 equiv, 0.30 mmol, 100 mg) in the presence of 2-chloropyridine (1.0 equiv, 0.20 mmol, 23 mg) in 95% yield and 95% ee (0.19 mmol, 56 mg). After isolation, enantio-enriched product was obtained as a clear colorless oil. Other coordinating additives gave different levels of enantioselectivity as reported in **section 5.3**.

**<sup>1</sup>H NMR** (400 MHz, CDCl<sub>3</sub>) δ 7.02 (dd, *J* = 5.1, 1.9 Hz, 3H), 6.96 (d, *J* = 2.3 Hz, 1H), 6.94 – 6.86 (m, 1H), 6.83 – 6.71 (m, 2H), 6.43 (d, *J* = 8.2 Hz, 1H), 3.65 (s, 3H), 3.31 (s, 3H), 3.21 (dd, *J* = 9.3, 7.4 Hz, 1H), 2.23 (s, 3H), 1.97 (dd, *J* = 9.3, 4.9 Hz, 1H), 1.82 (dd, *J* = 7.3, 5.0 Hz, 1H).

**<sup>13</sup>C NMR** (151 MHz, CDCl<sub>3</sub>) δ 174.5, 156.9, 136.9, 132.3, 129.0, 128.8, 127.7, 127.7, 127.0, 125.8, 123.5, 110.1, 55.0, 55.0, 52.4, 34.0, 32.4, 20.6, 20.5.

**HRMS:** (+p APCI) calculated for [C<sub>19</sub>H<sub>20</sub>O<sub>3</sub>+] 296.1407, found 296.1409

**IR**(neat): 1716, 1502, 1460, 1436, 1410, 1354, 1263, 1244, 1186, 1159, 1144, 1067, 1031, 907, 806, 729, 683, 646, 503 cm<sup>-1</sup>

**Chiral HPLC:** (OD-H, 30 min, 1 mL/min, 1% *i*-PrOH in *n*-hexane, UV 230 nm) RT: 10.89 min, 12.80 min. or (AD-H, 30 min, 1 mL/min, 1% *i*-PrOH in *n*-hexane, UV 230 nm) RT: 9.61 min, 11.17 min.

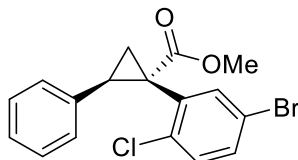

**Methyl (1*S*,2*R*)-1-(5-bromo-2-chlorophenyl)-2-phenylcyclopropane-1-carboxylate (42)**

This compound was prepared according to **General procedure 3.3** and **General procedure 3.4** from the reaction between **S12** and freshly columned styrene. **General procedure 3.3:** **S12** (0.20 mmol, 58 mg) and styrene (5.0 equiv, 1.00 mmol, 100 mg) in 76% yield and 64% ee (0.15 mmol, 56 mg) **General procedure 3.4:** **S12** (0.20 mmol, 58 mg) and styrene (5.0 equiv, 0.30 mmol, 100 mg) in the presence of 2-chloropyridine (1.0 equiv, 0.20 mmol, 23 mg) in 71% yield and 92% ee (0.14 mmol, 52 mg). After isolation, enantio-enriched product was obtained as a clear colorless oil. Other coordinating additives gave different levels of enantioselectivity as reported in the following section.

**<sup>1</sup>H NMR** (600 MHz, CDCl<sub>3</sub>) δ 7.23 (dd, *J*=2.23, 8.46 Hz, 1H), 7.10 (s, 4H), 7.02 (broad s, 1H), 6.86 (m, 2H), 3.68 (s, 3H) 3.32 (m, 1H), 2.10 (broad s, 1H), 1.90 (m, 1H)

**<sup>13</sup>C NMR** (151 MHz, CDCl<sub>3</sub>) δ 172.6, 136.8, 135.5, 134.0, 131.5, 130.6, 127.9, 127.6, 127.6, 119.5, 52.7, 33.3, 33.3, 21.4

**HRMS:** (+p APCI) calculated for [C<sub>17</sub>H<sub>15</sub>O<sub>2</sub><sup>79</sup>Br<sup>35</sup>Cl<sup>+</sup>] 364.9938, found 364.9932

**IR**(neat): 3027, 2970, 2949, 1720, 1458, 1433, 1266, 1246, 1208, 1192, 116, 1115, 1085, 1045, 969, 814, 770, 731, 695, 526 cm<sup>-1</sup>

**Chiral HPLC:** (OJ-H, 30 min, 1 mL/min, 1% *i*-PrOH in *n*-hexane, UV 230 nm) RT: 9.07 min, 11.82 min

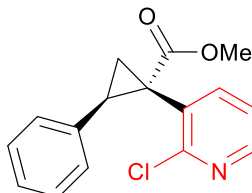

**Methyl (1*S*,2*R*)-1-(2-chloropyridin-3-yl)-2-phenylcyclopropane-1-carboxylate (43)**

This compound was prepared according to **General procedure 3.3** and **General procedure 3.4** from the reaction between **S20** and freshly columned styrene. **General procedure 3.3:** **S20** (0.20 mmol, 42 mg) and styrene (5.0 equiv, 1.00 mmol, 100 mg) in 82% yield and 77% ee (0.16 mmol, 47 mg) **General procedure 3.4:** **S20** (0.20 mmol, 42 mg) and styrene (5.0 equiv, 0.30 mmol, 100 mg) in the presence of 2-chloropyridine (1.0 equiv, 0.20 mmol, 23 mg) in 94% yield and 90% ee (0.19 mmol, 54 mg). After isolation, enantio-enriched product was obtained as a clear crystalline solid.

**MP:** 115-119 °C

**<sup>1</sup>H NMR** (600 MHz, CDCl<sub>3</sub>) δ 8.19 (m, 1H), 7.09 (broad s, 5H), 6.85 (m, 2H), 3.68 (s, 3H), 3.34 (m, 1H), 2.18 (broad s, 1H), 1.92 (dd, *J* = 5.46, 7.59 Hz, 1H)

**<sup>13</sup>C NMR** (151 MHz, CDCl<sub>3</sub>) δ 172.5, 154.3, 148.1, 141.3, 134.9, 130.4, 129.3, 128.0, 127.8, 126.9, 121.6, 52.7, 34.1, 33.5, 25.3, 20.0

**HRMS:** (+p APCI) calculated for [C<sub>16</sub>H<sub>15</sub>O<sub>2</sub>N<sup>35</sup>Cl<sup>+</sup>] 288.0785, found 288.0786

**IR**(neat): 1720, 1452, 1433, 1397, 1262, 1221, 1163, 1132, 1059, 966, 908, 776, 750, 728, 697, 646, 562 cm<sup>-1</sup>

**Chiral HPLC:** (AD-H, 30 min, 1 mL/min, 1% *i*-PrOH in *n*-hexane, UV 230 nm) RT: 20.19 min, 23.41 min.

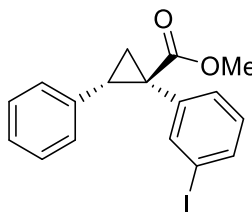

**Methyl (1*R*,2*S*)-1-(3-iodophenyl)-2-phenylcyclopropane-1-carboxylate (45)**

This compound was prepared according to **General procedure 3.3** and **General procedure 3.4** from the reaction between **S10** and freshly columned styrene. **General procedure 3.3:** **S10** (0.20 mmol, 60 mg) and styrene (5.0 equiv, 1.00 mmol, 100 mg) in 66% yield and 29% ee (0.13 mmol, 50 mg) **General procedure 3.4:** **S10** (0.20 mmol, 60 mg) and styrene (5.0

equiv, 0.30 mmol, 100 mg) in the presence of 2-chloropyridine (1.0 equiv, 0.20 mmol, 23 mg) in 80% yield and 41% ee (0.16 mmol, 61 mg). After isolation, product was obtained as a colorless oil.

**<sup>1</sup>H NMR** (400 MHz, CDCl<sub>3</sub>) δ 7.52 – 7.38 (m, 2H), 7.10 (dd, *J* = 5.2, 2.0 Hz, 3H), 6.98 – 6.85 (m, 1H), 6.84 (d, *J* = 7.7 Hz, 1H), 6.82 – 6.72 (m, 2H), 3.67 (s, 3H), 3.11 (dd, *J* = 9.3, 7.3 Hz, 1H), 2.13 (dd, *J* = 9.3, 5.0 Hz, 1H), 1.85 (dd, *J* = 7.4, 5.0 Hz, 1H).

**<sup>13</sup>C NMR** (151 MHz, CDCl<sub>3</sub>) δ 173.6, 140.7, 137.2, 136.1, 135.7, 131.4, 129.2, 128.0, 127.8, 126.6, 93.3, 52.7, 36.7, 33.1, 20.2.

**HRMS:** (+p APCI) calculated for [C<sub>17</sub>H<sub>16</sub>O<sub>2</sub><sup>127</sup>I +] 379.0189, found 379.0184

**IR**(neat): 1713, 1590, 1559, 1474, 1455, 1431, 1250, 1209, 1190, 1095, 1054, 995, 965, 936, 908, 884, 789, 763, 729, 696, 678, 645, 592, 565 cm<sup>-1</sup>

**Chiral HPLC:** (OD-H, 30 min, 1 mL/min, 1% *i*-PrOH in *n*-hexane, UV 230 nm) RT: 8.23 min, 9.27 min.

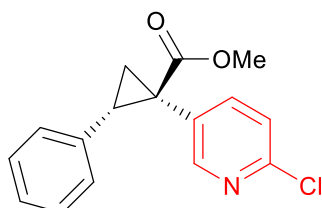

**Methyl (1*R*,2*S*)-1-(6-chloropyridin-3-yl)-2-phenylcyclopropane-1-carboxylate (46)**

This compound was prepared according to **General procedure 3.3** and **General procedure 3.4** from the reaction between **S4** and freshly columned styrene. **General procedure 3.3:** **S4** (0.20 mmol, 42 mg) and styrene (5.0 equiv, 1.00 mmol, 100 mg) in 90% yield and 35% ee (0.18 mmol, 52 mg) **General procedure 3.4:** **S4** (0.20 mmol, 42 mg) and styrene (5.0 equiv, 0.30 mmol, 100 mg) in the presence of 2-chloropyridine (1.0 equiv, 0.20 mmol, 23 mg) in 90% yield and 7% ee (0.18 mmol, 52 mg). After isolation, enantio-enriched product was obtained as a clear colorless oil.

**<sup>1</sup>H NMR** (600 MHz, CDCl<sub>3</sub>) δ 8.08 (dd, *J* = 2.6, 0.8 Hz, 1H), 7.21 (dd, *J* = 8.2, 2.5 Hz, 1H), 7.11 (dq, *J* = 4.5, 2.3 Hz, 3H), 7.05 (dd, *J* = 8.2, 0.7 Hz, 1H), 6.87 – 6.71 (m, 2H), 3.67 (d, *J* = 3.5 Hz, 3H), 3.16 (dd, *J* = 9.3, 7.3 Hz, 1H), 2.21 (dd, *J* = 9.4, 5.2 Hz, 1H), 1.96 – 1.86 (m, 1H).

**<sup>13</sup>C NMR** (151 MHz, CDCl<sub>3</sub>) δ 173.2, 152.7, 150.2, 142.4, 135.1, 130.3, 128.5, 128.2, 127.3, 123.5, 53.0, 34.3, 33.1, 19.7.

**HRMS:** (+p APCI) calculated for [C<sub>16</sub>H<sub>15</sub>O<sub>2</sub>N<sup>35</sup>Cl+ ] 288.0785, found 288.0786

**IR**(neat): 2952, 1720, 1588, 1560, 1499, 1463, 1433, 1366, 1261, 1164, 1112, 1022, 965, 779, 742, 719, 696, 559, 485 cm<sup>-1</sup>

**Chiral HPLC:** (OD-H, 30 min, 1 mL/min, 1% *i*-PrOH in *n*-hexane, UV 230 nm) RT: 22.14 min, 25.67 min.

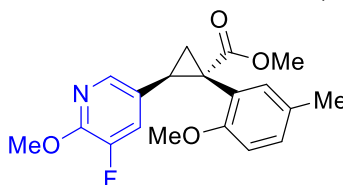

**Methyl-(1*S*,2*R*)-2-(5-fluoro-6-methoxypyridin-3-yl)-1-(2-methoxy-5-methylphenyl)cyclopropane-1-carboxylate (47)**

This compound was prepared according to **General procedure 3.4**, and **General procedure 3.5** from the reaction between **36** and **S26**. **General procedure 3.4:** **36** (0.20 mmol, 44 mg) and **S26** (1.5 equiv, 0.30 mmol, 46 mg) in 53% yield and 88% ee (0.16 mmol, 37 mg)., **General procedure 3.5:** **36** (0.20 mmol, 44 mg) and **S26** (1.5 equiv, 0.30 mmol, 46 mg) in 69% yield and 86% ee (0.16 mmol, 48 mg). After isolation, enantio-enriched product was obtained as a white solid.

**MP:** 114-116 °C

**<sup>1</sup>H NMR** (400 MHz, CDCl<sub>3</sub>) δ 7.57 (s, 1H), 6.98 – 6.91 (m, 2H), 6.65 (dd, *J* = 11.6, 1.9 Hz, 1H), 6.53 – 6.46 (m, 1H), 3.91 (s, 3H), 3.65 (s, 3H), 3.48 (s, 3H), 3.15 (dd, *J* = 9.3, 7.2 Hz, 1H), 2.24 (s, 3H), 1.93 (dd, *J* = 9.3, 5.1 Hz, 1H), 1.74 (dd, *J* = 7.2, 5.2 Hz, 2H).

**<sup>13</sup>C NMR** (151 MHz, CDCl<sub>3</sub>) δ 174.1, 151.5 (d, *J* = 11.3 Hz), 140.6, 140.6, 131.7, 129.5, 129.3, 126.9, 122.2, 122.1, 110.2, 55.0, 53.6, 52.5, 33.5, 29.7, 28.5, 20.5, 19.8.

**<sup>19</sup>F NMR** (151 MHz, CDCl<sub>3</sub>) δ -142.02 (d, *J* = 11.6 Hz)

**HRMS:** (+p APCI) calculated for [C<sub>19</sub>H<sub>21</sub>O<sub>4</sub>NF +] 346.1449, found 346.1448

**IR**(neat): 2948, 2850, 1720, 1616, 1577, 1495, 1440, 1411, 1378, 1296, 1240, 1194, 1161, 1136, 1085, 1016, 965, 906, 808, 778, 726, 647, 631, 560, 513 cm<sup>-1</sup>

**Chiral HPLC:** (OD-H, 30 min, 1 mL/min, 1% *i*-PrOH in *n*-hexane, UV 230 nm) RT: 10.90 min, 16.19 min.

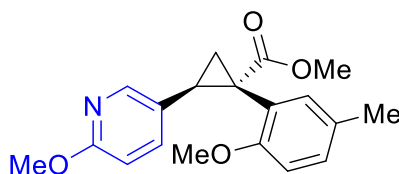

**Methyl-(1*S*,2*R*)-1-(2-methoxy-5-methylphenyl)-2-(6-methoxypyridin-3-yl)cyclopropane-1-carboxylate (48)**

This compound was prepared according to **General procedure 3.4** and **General procedure 3.5** from the reaction between **S24** and **36**. **General procedure 3.4**: **36** (0.20 mmol, 44 mg) and **S24** (1.5 equiv, 30 mmol, 46 mg) in 98% yield and 92% ee (0.20 mmol, 64 mg) **General procedure 3.5**: **36** (0.20 mmol, 44 mg) and **S24** (1.5 equiv, 0.30 mmol, 46 mg) in 66% yield and 90% ee (0.13 mmol, 43 mg). After isolation, enantio-enriched product was obtained as a clear colorless oil.

**<sup>1</sup>H NMR** (400 MHz, CDCl<sub>3</sub>) δ 7.78 (d, *J* = 2.5 Hz, 1H), 6.97 – 6.89 (m, 2H), 6.83 (dd, *J* = 8.6, 2.5 Hz, 1H), 6.46 (d, *J* = 8.1 Hz, 1H), 6.35 (d, *J* = 8.6 Hz, 1H), 3.81 (s, 3H), 3.64 (s, 3H), 3.42 (s, 3H), 3.14 (dd, *J* = 9.3, 7.3 Hz, 1H), 2.23 (s, 3H), 1.92 (dd, *J* = 9.3, 5.1 Hz, 1H), 1.76 (dd, *J* = 7.3, 5.1 Hz, 1H).

**<sup>13</sup>C NMR** (151 MHz, CDCl<sub>3</sub>) δ 174.3, 162.6, 156.5, 146.4, 137.3, 131.9, 129.3, 129.1, 125.3, 123.1, 110.1, 108.9, 55.0, 53.2, 52.5, 33.5, 29.1, 20.5, 19.8.

**HRMS**: (+p APCI) calculated for [C<sub>19</sub>H<sub>22</sub>O<sub>4</sub>N +] 328.1543, found 328.1537

**IR**(neat): 2948, 1716, 1607, 1571, 1496, 1463, 1435, 1399, 1352, 1259, 1242, 1191, 1157, 1143, 1130, 1084, 1029, 971, 907, 827, 808, 769, 726, 608, 588, 550 cm<sup>-1</sup>

**Chiral HPLC**: (OD-H, 30 min, 1 mL/min, 1% *i*-PrOH in *n*-hexane, UV 230 nm) RT: 10.74 min, 18.24 min.

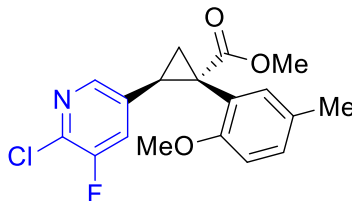

**Methyl-(1*S*,2*R*)-2-(6-chloro-5-fluoropyridin-3-yl)-1-(2-methoxy-5-methylphenyl)cyclopropane-1-carboxylate (49)**

This compound was prepared according to **General procedure 3.4** and **General procedure 3.5** from the reaction between **S27** and **36**. **General procedure 3.4**: **36** (0.20 mmol, 44 mg) and **S27** (1.5 equiv, 30 mmol, 47 mg) in 55% yield and 90% ee (0.11 mmol, 38mg) **General procedure 3.5**: **36** (0.20 mmol, 44 mg) and **S27** (1.5 equiv, 0.30 mmol, 47 mg) in 45% yield and 97% ee (0.09 mmol, 31 mg). After isolation, enantio-enriched product was obtained as a white solid.

**MP**: 124-127 °C

**<sup>1</sup>H NMR** (400 MHz, CDCl<sub>3</sub>) δ 7.87 (d, *J* = 2.0 Hz, 1H), 7.06 – 6.94 (m, 2H), 6.68 (dd, *J* = 9.4, 2.1 Hz, 1H), 6.48 (d, *J* = 8.9 Hz, 1H), 3.65 (s, 3H), 3.43 (s, 3H), 3.21 (dd, *J* = 9.2, 7.1 Hz, 1H), 2.25 (s, 3H), 2.00 (dd, *J* = 9.2, 5.3 Hz, 1H), 1.78 (dd, *J* = 7.1, 5.3 Hz, 1H).

**<sup>13</sup>C NMR** (151 MHz, CDCl<sub>3</sub>) δ 173.6, 156.1, 154.4, 152.7, 144.6 (d, *J* = 5.0 Hz), 135.0 (d, *J* = 3.1 Hz), 131.7, 130.0, 129.5, 122.6 (d, *J* = 19.4 Hz), 122.0, 110.3, 55.0, 52.7, 34.3, 28.2, 20.5, 20.3.

**<sup>19</sup>F NMR** (376 MHz, CDCl<sub>3</sub>) δ -121.30 (d, *J* = 9.4 Hz).

**HRMS**: (+p APCI) calculated for [C<sub>18</sub>H<sub>18</sub>O<sub>3</sub>N<sup>35</sup>ClF +] 350.0953, found 350.0951

**IR**(neat): 2950 1716, 1501, 1433, 1411, 1379, 1263, 1241, 1210, 1181, 1155, 1142, 1074, 1031, 964, 907, 808, 728, 703, 678, 647, 619, 559, 488 cm<sup>-1</sup>

**Chiral HPLC**: (*R,R*-Whelk, 60 min, 1 mL/min, 1% *i*-PrOH in *n*-hexane, UV 230 nm) RT: 43.60 min, 52.05 min.

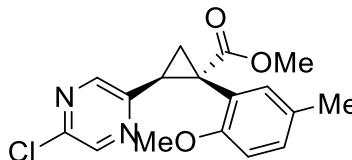

**Methyl (1*S*,2*S*)-2-(5-chloropyrazin-2-yl)-1-(2-methoxy-5-methylphenyl)cyclopropane-1-carboxylate (50)**

This compound was prepared according to **General procedure 3.5** from the reaction between **36** (0.20 mmol, 44 mg) and **2-chloro-5-ethenyl-pyrimidine** (1.5 equiv, 0.30 mmol, 84 mg, Enamine) in 89% yield and 96% ee (0.16 mmol, 59 mg). After isolation, enantio-enriched product was obtained as a viscous colorless oil.

**<sup>1</sup>H NMR** (400 MHz, CDCl<sub>3</sub>) δ 8.20 (d, *J* = 1.4 Hz, 1H), 8.03 (d, *J* = 1.4 Hz, 1H), 7.03 (d, *J* = 2.3 Hz, 1H), 6.96 – 6.91 (m, 1H), 6.39 (d, *J* = 8.3 Hz, 1H), 3.65 (s, 3H), 3.41 (s, 3H), 3.40 – 3.36 (m, 1H), 2.30 (dd, *J* = 6.9, 4.5 Hz, 1H), 2.25 (s, 3H), 1.98 (dd, *J* = 8.8, 4.5 Hz, 1H);

**<sup>13</sup>C NMR** (101 MHz, CDCl<sub>3</sub>) δ 173.6, 155.9, 151.1, 146.2, 144.6, 142.0, 132.7, 129.5, 129.2, 122.3, 109.5, 54.9, 52.7, 35.1, 30.1, 20.5, 19.5;

**HRMS** (ESI) *m/z* calculated for [C<sub>17</sub>H<sub>18</sub>ClN<sub>2</sub>O<sub>3</sub>+H]<sup>+</sup>, 333.1000; found 333.1006.

**Chiral SFC**: (ChiralCel-OD 3 μm column, 3 mL / minute, 5-50% MeOH / CO<sub>2</sub> over 5 min, RT: 0.99 min, 1.13 min.

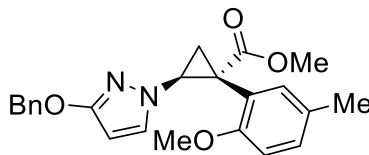

**Methyl (1*R*,2*S*)-2-(3-(benzyloxy)-1*H*-pyrazol-1-yl)-1-(2-methoxy-5-methylphenyl)cyclopropane-1-carboxylate (51)**

This compound was prepared according to **General procedure 3.5** from the reaction between **36** (0.20 mmol, 44 mg) and **S32** (1.5 equiv, 0.30 mmol, 60 mg) in 79% yield and 96% ee (0.16 mmol, 62mg). After isolation, enantio-enriched product was obtained as a viscous colorless oil.

**<sup>1</sup>H NMR** (400 MHz, CDCl<sub>3</sub>) δ 7.39 – 7.25 (m, 5H), 7.03 – 6.93 (m, 2H), 6.88 (d, *J* = 2.3 Hz, 1H), 6.60 (d, *J* = 8.3 Hz, 1H), 5.42 (d, *J* = 2.4 Hz, 1H), 5.06 – 4.88 (m, 2H), 4.49 (dd, *J* = 8.7, 5.6 Hz, 1H), 3.69 (s, 3H), 3.64 (s, 3H), 2.37 (t, *J* = 5.8 Hz, 1H), 2.17 (s, 3H), 2.04 (dd, *J* = 8.7, 6.0 Hz, 1H);

**<sup>13</sup>C NMR** (101 MHz, CDCl<sub>3</sub>) δ 173.0, 162.2, 156.9, 137.3, 131.9, 131.1, 129.4, 129.1, 128.4, 127.8, 127.7, 121.8, 110.0, 91.3, 70.7, 55.3, 52.5, 45.4, 32.5, 20.5, 18.7;

**HRMS** (ESI) *m/z* calculated for [C<sub>23</sub>H<sub>25</sub>N<sub>2</sub>O<sub>4</sub>+H]<sup>+</sup>, 393.1809; found 393.1818.

**Chiral SFC**: (ChiralPak-AD 3 μm column, 3 mL / minute, 5-50% MeOH / CO<sub>2</sub> over 5 min, RT: 1.18 min, 1.39 min.

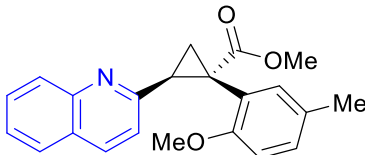

**Methyl (1S,2S)-1-(2-methoxy-5-methylphenyl)-2-(quinolin-2-yl)cyclopropane-1-carboxylate (52)**

This compound was prepared according to **General procedure 3.4** from the reaction between **36** (0.20 mmol, 44 mg) and **S28** (1.5 equiv, 0.30 mmol, 47 mg) in 78% yield and 96% ee (0.16 mmol, 54mg). After isolation, enantio-enriched product was obtained as a brown solid.

**MP**: 158-159 °C

**<sup>1</sup>H NMR** (400 MHz, CDCl<sub>3</sub>) δ 7.77 (dd, *J* = 8.8, 6.4 Hz, 2H), 7.63 (dd, *J* = 8.1, 1.5 Hz, 1H), 7.54 (ddd, *J* = 8.5, 6.8, 1.5 Hz, 1H), 7.37 (ddd, *J* = 8.1, 6.8, 1.2 Hz, 1H), 7.07 (d, *J* = 2.3 Hz, 1H), 6.94 (d, *J* = 8.5 Hz, 1H), 6.86 – 6.76 (m, 1H), 6.28 (d, *J* = 8.2 Hz, 1H), 3.67 (s, 3H), 3.58 (dd, *J* = 8.9, 7.1 Hz, 1H), 3.25 (s, 3H), 2.42 (dd, *J* = 7.0, 4.5 Hz, 1H), 2.20 (s, 3H), 2.06 (dd, *J* = 8.9, 4.5 Hz, 1H).

**<sup>13</sup>C NMR** (151 MHz, CDCl<sub>3</sub>) δ 174.0, 157.1, 156.5, 134.3, 132.6, 128.9, 128.8, 128.8, 127.1, 126.5, 125.4, 123.2, 121.1, 109.6, 54.9, 52.5, 34.8, 34.2, 20.4, 20.4.

**HRMS**: (+p APCI) calculated for [C<sub>22</sub>H<sub>22</sub>O<sub>3</sub>N +] 348.1594, found 348.1594

**IR**(neat): 2949, 1716, 1600, 1561, 1502, 1463, 1433, 1372, 1297, 1263, 1243, 1213, 1190, 1159, 1142, 1090, 1033, 961, 911, 827, 808, 770, 732, 700, 647, 586, 503 cm<sup>-1</sup>

**Chiral HPLC**: (AD-H, 60 min, 1 mL/min, 1% *i*-PrOH in *n*-hexane, UV 230 nm) RT: 20.15 min, 33.06 min.

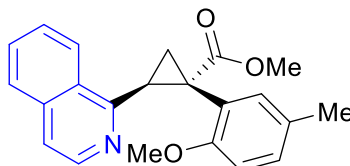

**Methyl (1S,2S)-2-(isoquinolin-1-yl)-1-(2-methoxy-5-methylphenyl)cyclopropane-1-carboxylate (53)**

This compound was prepared according to **General procedure 3.4** from the reaction between **36** (0.20 mmol, 44 mg) and **S29** (1.5 equiv, 30 mmol, 47 mg) in 84% yield and >99% ee (0.17 mmol, 59 mg). After isolation, enantio-enriched product was obtained as a white solid. In order to resolve enantiomers by chiral UHPLC, the product had to be reduced to the corresponding alcohol. The product (0.16 mmol 57mg) was dissolved in dry THF (1 mL) and LAH (1.5 equiv, 0.25 mmol, 0.25 mL 1.0 M solution in THF) was added dropwise to the stirring solution. The reaction was allowed to stir for 2 h before quenching with excess Na<sub>2</sub>SO<sub>4</sub> • 10 H<sub>2</sub>O. Quench ran for 30 min. Then the solids were filtered off and the crude residue was evaporated to dryness. The crude residue was dissolved in isopropanol, diluted with hexanes and used directly for UHPLC characterization.

**MP**: 118-120 °C

**<sup>1</sup>H NMR** (400 MHz, CDCl<sub>3</sub>) δ 8.63 – 8.47 (m, 1H), 8.01 (d, *J* = 5.7 Hz, 1H), 7.77 – 7.69 (m, 1H), 7.65 (dq, *J* = 6.8, 4.3 Hz, 2H), 7.27 (s, 2H), 7.07 (d, *J* = 2.2 Hz, 1H), 6.78 (ddd, *J* = 8.2, 2.3, 0.8 Hz, 1H), 6.13 (d, *J* = 8.2 Hz, 1H), 4.18 (dd, *J* = 8.7, 6.9 Hz, 1H), 3.73 (s, 3H), 2.88 (broad s, 1H), 2.81 (s, 3H), 2.21 (s, 3H), 1.97 (dd, *J* = 8.7, 4.2 Hz, 1H).

**<sup>13</sup>C NMR** (151 MHz, CDCl<sub>3</sub>) δ 174.5, 156.0, 155.5, 140.6, 135.5, 132.5, 129.4, 128.8, 128.5 (2 C), 126.7, 126.4, 126.3, 122.8, 118.8, 108.7, 53.9, 52.6, 35.4, 29.9, 20.4, 18.6.

**HRMS**: (+p APCI) calculated for [C<sub>22</sub>H<sub>22</sub>O<sub>3</sub>N +] 348.1594, found 348.1593

**IR**(neat): 3005, 2949, 2833, 1717, 1621, 1585, 1561, 1501, 1461, 1435, 1404, 1365, 1271, 1240, 1216, 1171, 1141, 1092, 1032, 992, 971, 908, 871, 822, 807, 727, 683, 647, 618, 582, 529, 505 cm<sup>-1</sup>

**Chiral HPLC**: (AD-H, 30 min, 3 mL/min, 3% *i*-PrOH in *n*-hexane, UV 230 nm) RT: 7.98 min, 11.62 min.

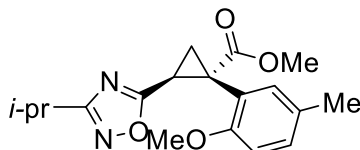

**Methyl (1S,2S)-2-(3-isopropyl-1,2,4-oxadiazol-5-yl)-1-(2-methoxy-5-methylphenyl)cyclopropane-1-carboxylate (54)**

This compound was prepared according to **General procedure 3.5** from the reaction between **36** (0.20 mmol, 44 mg) and **S30** (1.5 equiv, 0.30 mmol, 42 mg) in 52% yield and >99% ee (0.10 mmol, 34 mg). After isolation, enantio-enriched product was obtained as a viscous colorless oil.

**<sup>1</sup>H NMR** (400 MHz, CDCl<sub>3</sub>) δ 7.01 – 6.97 (m, 2H), 6.54 (d, *J* = 8.8 Hz, 1H), 3.66 (s, 3H), 3.54 (s, 3H), 3.40 (dd, *J* = 9.0, 6.9 Hz, 1H), 2.84 (hept, *J* = 6.9 Hz, 1H), 2.24 (d, *J* = 0.7 Hz, 3H), 2.17 (dd, *J* = 6.8, 4.8 Hz, 1H), 2.11 (dd, *J* = 9.0, 4.8 Hz, 1H), 1.07 (dd, *J* = 11.2, 6.9 Hz, 6H);

**<sup>13</sup>C NMR** (101 MHz, CDCl<sub>3</sub>) δ 176.4, 174.4, 172.6, 156.5, 132.2, 129.7, 129.2, 122.1, 109.8, 55.2, 52.9, 34.5, 26.4, 23.0, 21.1, 20.6, 20.4, 20.0;

**HRMS** (ESI) *m/z* calculated for [C<sub>18</sub>H<sub>23</sub>N<sub>2</sub>O<sub>4</sub>+H]<sup>+</sup>, 331.1652; found 331.1659.

**Chiral SFC:** (ChiralPak-IB N-3 3μm column, 3 mL / minute, 5-30% *i*PrOH / CO<sub>2</sub> with DEA additive over 5 min, RT: 1.39 min, 1.75 min.

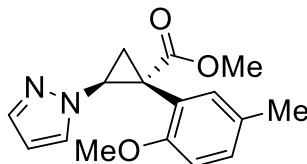

**Methyl (1*R*,2*S*)-1-(2-methoxy-5-methylphenyl)-2-(1*H*-pyrazol-1-yl)cyclopropane-1-carboxylate (55)**

This compound was prepared according to **General procedure 3.5** from the reaction between **36** (0.20 mmol, 44 mg) and ***N*-vinylpyrazole** (1.5 equiv, 0.30 mmol, 28 mg, Enamine) in 82% yield and 96% ee (0.16 mmol, 47 mg). After isolation, enantio-enriched product was obtained as a viscous colorless oil.

**<sup>1</sup>H NMR** (400 MHz, CDCl<sub>3</sub>) δ 7.22 (ddd, *J* = 3.9, 2.1, 0.7 Hz, 2H), 6.94 (dtd, *J* = 8.3, 1.4, 0.7 Hz, 1H), 6.85 – 6.80 (m, 1H), 6.57 (d, *J* = 8.3 Hz, 1H), 5.99 (dd, *J* = 2.4, 1.8 Hz, 1H), 4.65 (dd, *J* = 8.7, 5.6 Hz, 1H), 3.69 (s, 3H), 3.65 (d, *J* = 0.5 Hz, 3H), 2.50 (t, *J* = 5.8 Hz, 1H), 2.16 (t, *J* = 0.7 Hz, 3H), 2.08 (dd, *J* = 8.7, 6.0 Hz, 1H);

**<sup>13</sup>C NMR** (101 MHz, CDCl<sub>3</sub>) δ 172.9, 156.7, 138.4, 131.7, 129.9, 129.5, 129.3, 121.5, 109.9, 105.5, 55.2, 52.5, 45.1, 32.6, 20.4, 18.7;

**HRMS** (ESI) *m/z* calculated for [C<sub>16</sub>H<sub>19</sub>N<sub>2</sub>O<sub>3</sub> +H]<sup>+</sup>, 287.1390; found 287.1395.

**Chiral SFC:** (Lux i-Cellulose-5 (IC) column, 3 mL / minute, 5-50% MeOH / CO<sub>2</sub> over 5 min, RT: 1.40 min, 1.56 min.

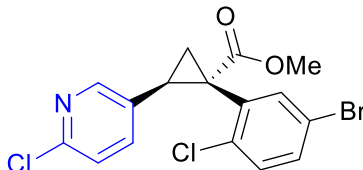

**Methyl (1*S*,2*R*)-1-(5-bromo-2-chlorophenyl)-2-(6-chloropyridin-3-yl)cyclopropane-1-carboxylate (56)**

This compound was prepared according to **General procedure 3.4** from the reaction between **S12** (0.20 mmol, 58 mg) and **35** (1.5 equiv, 0.30 mmol, 42 mg) in 98% yield and 93% ee (0.20 mmol, 78 mg). After isolation, enantio-enriched product was obtained as a white solid.

**MP:** 96-99 °C

**<sup>1</sup>H NMR** (400 MHz, CDCl<sub>3</sub>) δ 8.07 – 7.91 (s, 1H), 7.52 (s, 1H), 7.32 (dd, *J* = 8.5, 2.4 Hz, 1H), 7.11 – 7.00 (m, 2H), 6.96 (dd, *J* = 8.3, 2.2 Hz, 1H), 3.71 (s, 3H), 3.33 (t, *J* = 7.9 Hz, 1H), 2.14 (s, 1H), 1.90 (dd, *J* = 7.3, 5.5 Hz, 1H).

**<sup>13</sup>C NMR** (151 MHz, CDCl<sub>3</sub>) δ 171.9, 149.7, 149.3, 137.0, 135.8, 135.0, 134.6, 132.4, 131.0, 130.2, 122.9, 120.2, 53.0, 36.7, 29.6, 20.8.

**HRMS:** (+p APCI) calculated for [C<sub>16</sub>H<sub>13</sub>O<sub>2</sub>N<sup>79</sup>Br<sup>35</sup>Cl<sub>2</sub> +] 399.9501 found 399.9501

**IR**(neat): 3016, 2951, 1722, 1586, 1560, 1465, 1434, 1365, 1350, 1270, 1248, 1208, 1166, 1141, 1114, 1045, 1024, 970, 909, 892, 815, 741, 730, 647, 634, 533 cm<sup>-1</sup>

**Chiral HPLC:** (OD-H, 60 min, 1 mL/min, 1% *i*-PrOH in *n*-hexane, UV 230 nm) RT: 26.38 min, 29.94 min.

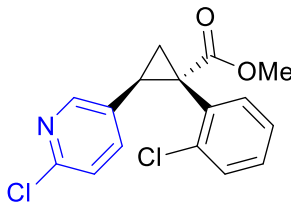

**Methyl (1*S*,2*R*)-1-(2-chlorophenyl)-2-(6-chloropyridin-3-yl)cyclopropane-1-carboxylate (57)**

This compound was prepared according to **General procedure 3.4** from the reaction between **S5** (0.20 mmol, 42 mg) and **35** (1.5 equiv, 0.30 mmol, 42 mg) in 75% yield and 92% ee (0.15 mmol, 49 mg). After isolation, enantio-enriched product was obtained as a clear colorless oil.

**<sup>1</sup>H NMR** (400 MHz, CDCl<sub>3</sub>) δ 7.98 (d, *J* = 2.5 Hz, 1H), 7.49 – 7.27 (m, 1H), 7.25 – 7.12 (m, 3H), 6.94 (d, *J* = 8.3 Hz, 1H), 6.87 (dd, *J* = 8.3, 2.6 Hz, 1H), 3.68 (s, 3H), 3.30 (t, *J* = 8.4 Hz, 1H), 2.11 (t, *J* = 8.2 Hz, 1H), 1.89 (dd, *J* = 7.3, 5.4 Hz, 1H).

**<sup>13</sup>C NMR** (151 MHz, CDCl<sub>3</sub>) δ 172.8, 149.6, 149.7, 137.2, 137.1, 132.5, 130.9, 129.9, 129.6, 126.9, 123.0, 53.1, 37.0, 29.7

**HRMS:** (+p APCI) calculated for [C<sub>16</sub>H<sub>14</sub>O<sub>2</sub>N<sup>35</sup>Cl<sub>2</sub>+] 322.0396, found 322.0399

**IR**(neat): 2923, 2852, 1720, 1586, 1561, 1464, 1434, 1397, 1348, 1269, 1250, 1208, 1165, 1143, 1110, 1034, 1023, 992, 968, 909, 885, 833, 802, 780, 741, 699, 660, 647, 586, 518, 470, 434 cm<sup>-1</sup>

**Chiral HPLC:** (OD-H, 60 min, 1 mL/min, 1% *i*-PrOH in *n*-hexane, UV 230 nm) RT: 28.71 min, 32.79 min

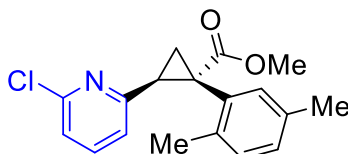

**Methyl (1S,2S)-2-(6-chloropyridin-2-yl)-1-(2,5-dimethylphenyl)cyclopropane-1-carboxylate (58)**

This compound was prepared according to **General procedure 3.5**: **S11** (0.20 mmol, 41 mg) and **66** (1.5 equiv, 0.30 mmol, 42 mg) in 74% yield and >99% ee (0.15 mmol, 47 mg). After isolation, enantio-enriched product was obtained as a clear colorless oil.

**<sup>1</sup>H NMR** (500 MHz, CDCl<sub>3</sub>) δ 7.29 – 7.05 (m, 2H), 6.97 (d, J = 7.8 Hz, 1H), 6.93 – 6.86 (m, 1H), 6.80 (s, 1H), 6.50 (d, J = 7.1 Hz, 1H), 3.66 (s, 3H), 3.46 – 3.32 (m, 1H), 2.48 – 1.82 (m, 8H);

**<sup>13</sup>C NMR** (101 MHz, CDCl<sub>3</sub>) δ 173.5, 157.6, 149.8, 137.7, 136.0, 134.6, 132.2, 129.6, 128.3, 121.4, 120.2, 52.6, 33.8, 21.7, 20.9, 18.8;

**HRMS** (ESI) m/z calculated for C<sub>18</sub>H<sub>19</sub>ClNO<sub>2</sub> [M+H]<sup>+</sup>, 316.1104; found 316.1097.

**Chiral SFC**: (ChiralPak IC column, 3 mL / minute, 5-30% MeOH / CO<sub>2</sub> over 10 min, RT: 2.15 min, 2.57 min.

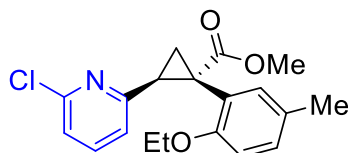

**Methyl (1S,2S)-2-(6-chloropyridin-2-yl)-1-(2-ethoxy-5-methylphenyl)cyclopropane-1-carboxylate (59)**

This compound was prepared according to **General procedure 3.5**: **S21** (0.20 mmol, 47 mg) and **66** (1.5 equiv, 0.30 mmol, 42 mg) in 82% yield and 99% ee (0.16 mmol, 56 mg). After isolation, enantio-enriched product was obtained as a clear colorless oil.

**<sup>1</sup>H NMR** (500 MHz, CDCl<sub>3</sub>) δ 7.25 (t, J = 7.8 Hz, 1H), 7.01 (d, J = 2.4 Hz, 1H), 6.92 – 6.87 (m, 2H), 6.70 (dd, J = 7.8, 0.8 Hz, 1H), 6.40 (d, J = 8.2 Hz, 1H), 3.79 (dq, J = 8.7, 7.0 Hz, 1H), 3.64 (s, 3H), 3.41 (ddd, J = 15.9, 9.1, 7.0 Hz, 2H), 2.27 – 2.20 (m, 4H), 1.94 (dd, J = 8.9, 4.8 Hz, 1H), 1.24 (t, J = 7.0 Hz, 3H);

**<sup>13</sup>C NMR** (101 MHz, CDCl<sub>3</sub>) δ 173.9, 158.0, 155.7, 149.4, 137.3, 132.5, 129.0, 128.7, 122.6, 121.0, 120.9, 110.1, 62.9, 52.4, 34.9, 32.8, 20.4, 20.1, 14.7;

**HRMS** (ESI) m/z calculated for C<sub>19</sub>H<sub>21</sub>ClNO<sub>3</sub> [M+H]<sup>+</sup>, 346.1215; found 346.1208.

**Chiral SFC**: (ChiralPak IC column, 3 mL / minute, 5-30% MeOH / CO<sub>2</sub> over 10 min, RT: 2.63 min, 2.96 min.

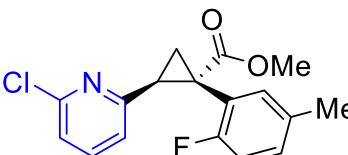

**Methyl (1S,2S)-2-(6-chloropyridin-2-yl)-1-(2-fluoro-5-methylphenyl)cyclopropane-1-carboxylate (60)**

This compound was prepared according to **General procedure 3.5**: **S22** (0.20 mmol, 42 mg) and **66** (1.5 equiv, 0.30 mmol, 42 mg) in 81% yield and >99% ee (0.16 mmol, 52 mg). After isolation, enantio-enriched product was obtained as a clear colorless oil.

**<sup>1</sup>H NMR** (500 MHz, CDCl<sub>3</sub>) δ 7.37 (t, J = 7.8 Hz, 1H), 7.02 – 6.93 (m, 3H), 6.93 – 6.88 (m, 1H), 6.62 (dd, J = 9.9, 8.3 Hz, 1H), 3.68 (s, 3H), 3.34 (dd, J = 8.9, 7.0 Hz, 1H), 2.35 (dd, J = 7.0, 4.7 Hz, 1H), 2.24 (d, J = 1.0 Hz, 3H), 2.06 (dd, J = 8.9, 4.7 Hz, 1H); **<sup>13</sup>C NMR** (101 MHz, CDCl<sub>3</sub>) δ 173.0, 161.5, 159.1, 156.8, 149.9, 138.0, 133.1 (d, J = 3.7 Hz), 129.6 (d, J = 8.1 Hz), 121.9, 121.6, 114.3, 114.1, 52.8, 33.6, 33.1, 20.5, 19.5.

**<sup>19</sup>F NMR** (376 MHz, CDCl<sub>3</sub>) δ -119.37 (dt, J = 10.9, 6.0 Hz).

**HRMS** (ESI) m/z calculated for C<sub>17</sub>H<sub>16</sub>ClFNO<sub>2</sub> [M+H]<sup>+</sup>, 320.0859; found 320.0857.

**Chiral SFC**: ChiralPak-IB column, 3 mL / minute, 5-50% MeOH / CO<sub>2</sub> over 10 min, RT: 0.96 min, 1.07 min.

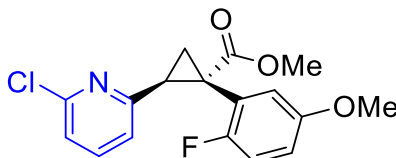

**Methyl (1S,2S)-2-(6-chloropyridin-2-yl)-1-(2-fluoro-5-methoxyphenyl)cyclopropane-1-carboxylate (61)**

This compound was prepared according to **General procedure 3.5**: **S23** (0.20 mmol, 45 mg) and **66** (1.5 equiv, 0.30 mmol, 42 mg) in 71% yield and >99% ee (0.14 mmol, 48 mg). After isolation, enantio-enriched product was obtained as a white solid.

**<sup>1</sup>H NMR** (400 MHz, CDCl<sub>3</sub>) δ 7.38 (t, J = 7.7 Hz, 1H), 7.02 – 6.93 (m, 2H), 6.72 – 6.59 (m, 3H), 3.70 (s, 3H), 3.69 (s, 3H), 3.34 (dd, J = 9.0, 7.0 Hz, 1H), 2.34 (dd, J = 7.0, 4.7 Hz, 1H), 2.07 (dd, J = 8.9, 4.7 Hz, 1H);

**<sup>13</sup>C NMR** (101 MHz, CDCl<sub>3</sub>) δ 172.7, 157.8, 156.7, 155.5, 155.0 (d, J = 2.0 Hz), 150.0, 138.0, 121.9, 121.6, 117.6 (d, J = 3.7 Hz), 115.2, 114.9, 114.5 (d, J = 8.2 Hz), 55.8, 52.7, 33.3, 19.7.

**<sup>19</sup>F NMR** (376 MHz, CDCl<sub>3</sub>) δ -124.68 (dt, *J* = 8.6, 5.5 Hz).

**HRMS** (ESI) *m/z* calculated for [C<sub>17</sub>H<sub>16</sub>ClFNO<sub>3</sub> + H]<sup>+</sup>, 336.0808; found 336.0808.

**Chiral SFC**: Lux i-Cellulose column, 3 mL / minute, 5-25% IPA / CO<sub>2</sub> over 10 min, RT: 2.08 min, 2.40 min.

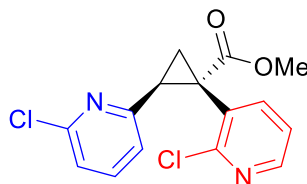

**Methyl (1*S*,2*S*)-2-(6-chloropyridin-2-yl)-1-(2-chloropyridin-3-yl)cyclopropane-1-carboxylate (62)**

This compound was prepared according to **General procedure 3.4** from the reaction between **S20** (0.20 mmol, 42 mg) and **66** (1.5 equiv, 30 mmol, 42 mg) in 87% yield and 85% ee (0.17 mmol, 56 mg). After isolation, enantio-enriched product was obtained as a clear colorless oil.

**<sup>1</sup>H NMR** (400 MHz, CDCl<sub>3</sub>) δ 8.21 (ddd, *J* = 10.3, 4.9, 1.9 Hz, 2H), 7.32 (broad s, 1H), 7.03 (broad s, 1H), 6.88 (broad s, 1H), 6.65 (broad s, 1H), 3.72 (s, 3H), 3.65 (broad s, 1H), 2.33 (broad s, 1H), 1.90 (dd, *J* = 7.8, 5.7 Hz, 1H).

**<sup>13</sup>C NMR** (151 MHz, CDCl<sub>3</sub>) δ 171.7, 154.1, 153.4, 148.6 (2 C), 147.8, 141.6, 129.6, 121.9 (2 C), 121.7, 53.1, 29.6, 25.3, 20.9.

**HRMS**: (+p APCI) calculated for [C<sub>15</sub>H<sub>13</sub>O<sub>2</sub>N<sub>2</sub><sup>35</sup>Cl<sub>2</sub> + ] 323.0348, found 323.0340

**IR**(neat): 1724, 1563, 1436, 1411, 1398, 1357, 1268, 1220, 1196, 1166, 1132, 1063, 756, 732, 682 cm<sup>-1</sup>

**Chiral HPLC**: (AD-H, 30 min, 1 mL/min, 1% *i*-PrOH in *n*-hexane, UV 230 nm) RT: 10.65 min, 11.71 min.

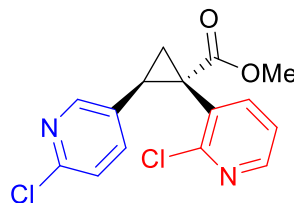

**Methyl (1*S*,2*R*)-1-(2-chloropyridin-3-yl)-2-(6-chloropyridin-3-yl)cyclopropane-1-carboxylate (63)**

This compound was prepared according to **General procedure 3.4** from the reaction between **S20** (0.20 mmol, 42 mg) and **35** (1.5 equiv, 30 mmol, 42 mg) in 79% yield and 84% ee (0.16 mmol, 51 mg). After isolation, enantio-enriched product was obtained as a clear colorless oil.

**<sup>1</sup>H NMR** (600 MHz, CDCl<sub>3</sub>) δ 8.27 (s, 1H), 7.98 (s, 1H), 7.19 (s, 1H), 7.03 (s, 3 H), 3.70 (s, 3H), 3.36 (m, 1 H), 2.18 (broad s, 1H), 1.69 (broad s, 1H)

**<sup>13</sup>C NMR** (151 MHz, CDCl<sub>3</sub>) δ 171.7, 153.9, 149.9, 149.1, 148.8, 137.5, 129.4, 123.1, 122.1, 53.0, 36.0, 29.6, 29.6, 25.3

**HRMS**: (+p APCI) calculated for [C<sub>15</sub>H<sub>13</sub>O<sub>2</sub>N<sub>2</sub><sup>35</sup>Cl<sub>2</sub> + ] 323.0348, found 323.0349

**IR**(neat): 3016, 2970, 2950, 1721, 1562, 1464, 1434, 1397, 1348, 1265, 1221, 1165, 1132, 1108, 1058, 1023, 967, 911, 835, 801, 779, 754, 728, 659, 647, 633, 437 cm<sup>-1</sup>

**Chiral HPLC**: (AD-H, 60 min, 1 mL/min, 1% *i*-PrOH in *n*-hexane, UV 230 nm) RT: 29.56 min, 34.74 min.

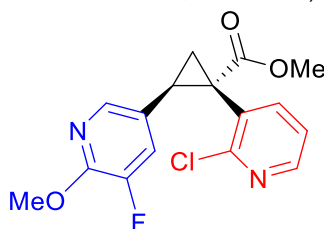

**Methyl (1*S*,2*R*)-1-(2-chloropyridin-3-yl)-2-(5-fluoro-6-methoxypyridin-3-yl)cyclopropane-1-carboxylate (64)**

This compound was prepared according to **General procedure 3.4** from the reaction between **S20** (0.20 mmol, 42 mg) and **S26** (1.5 equiv, 30 mmol, 46 mg) in 74% yield and 72% ee (0.15 mmol, 50 mg). After isolation, enantio-enriched product was obtained as clear colorless oil.

**<sup>1</sup>H NMR** (400 MHz, CDCl<sub>3</sub>) δ 8.25 (dd, *J* = 4.8, 1.9 Hz, 1H), 7.58 (d, *J* = 2.1 Hz, 1H), 7.48 (d, *J* = 48.6 Hz, 1H), 7.17 (s, 1H), 6.67 (dd, *J* = 11.2, 2.1 Hz, 1H), 3.92 (s, 3H), 3.69 (s, 3H), 3.31 (t, *J* = 8.4 Hz, 1H), 2.14 (s, 1H), 1.81 (dd, *J* = 7.4, 5.6 Hz, 1H).

**<sup>13</sup>C NMR** (151 MHz, CDCl<sub>3</sub>) δ 172.0, 154.0, 152.3 (d, *J* = 11.5 Hz), 148.6, 147.4, 145.7, 140.8 (d, *J* = 5.7 Hz), 129.8, 124.5, 122.1, 122.0, 121.9, 53.7, 52.9, 35.6, 29.7.

**<sup>19</sup>F NMR** (376 MHz, CDCl<sub>3</sub>) δ -140.38 (d, *J* = 11.2 Hz).

**HRMS**: (+p APCI) calculated for [C<sub>16</sub>H<sub>15</sub>O<sub>3</sub>N<sub>2</sub><sup>35</sup>ClF + ] 337.0749, found 337.0747

**IR**(neat): 2952, 1720, 1617, 1579, 1564, 1496, 1437, 1413, 1398, 1264, 1219, 1196, 1169, 1140, 1059, 959, 909, 776, 751, 731, 654, 564, 503 cm<sup>-1</sup>

**Chiral HPLC**: (AD-H, 80 min, 1 mL/min, 1% *i*-PrOH in *n*-hexane, UV 230 nm) RT: 40.39 min, 66.59 min

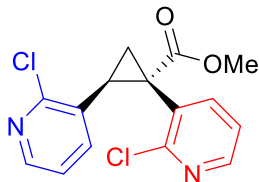

**Methyl (1S,2S)-1,2-bis(2-chloropyridin-3-yl)cyclopropane-1-carboxylate (65)**

This compound was prepared according to **General procedure 3.4** from the reaction between **S20** (0.20 mmol, 42 mg) and **S25** (1.5 equiv, 30 mmol, 42 mg) in 65% yield and 95% ee (0.13 mmol, 42 mg). After isolation, enantio-enriched product was obtained as a clear colorless oil.

**<sup>1</sup>H NMR** (400 MHz, CDCl<sub>3</sub>) δ 8.20 (dd, *J* = 4.8, 1.9 Hz, 1H), 7.77 (s, 1H), 7.43 (t, *J* = 7.7 Hz, 1H), 7.20 (broad s, 1H), 6.94 (d, *J* = 7.9 Hz, 1H), 3.69 (s, 3H), 3.49 – 3.40 (m, 1H), 2.44 (broad s, 1H), 2.05 (broad s, 1H).

**<sup>13</sup>C NMR** (151 MHz, CDCl<sub>3</sub>) δ 172.1, 155.7, 153.3, 149.9, 148.1, 141.8, 138.1, 130.1, 123.6, 121.8, 52.9, 37.0, 33.0, 29.7, 22.7, 20.9.

**HRMS:** (+p APCI) calculated for [C<sub>15</sub>H<sub>13</sub>O<sub>2</sub>N<sub>2</sub><sup>35</sup>Cl<sub>2</sub>]<sup>+</sup> 323.0348, found 323.0346

**IR**(neat): 1722, 1583, 1558, 1434, 1398, 1377, 1265, 1220, 1162, 1132, 1096, 1058, 991, 941, 910, 810, 796, 770, 752, 730, 714, 654 cm<sup>-1</sup>

**Chiral HPLC:** (AD-H, 30 min, 1 mL/min, 1% *i*-PrOH in *n*-hexane, UV 230 nm) RT: 22.81 min, 24.16 min.

## 5. Determination of enantioselectivity

### 5.1: Diastereoselectivity of *R*-pantolactonate cyclopropanes.

Diastereoselectivity of these products was determined through analysis of the crude cyclopropanation products via <sup>1</sup>H NMR. The reaction has the potential to form 4 stereoisomers. 2 arise from the enantiocontrol of the pantolactonate, and 2 arise from the *cis/trans* diastereoselectivity inherent to donor-acceptor rhodium carbenes. In-order to resolve the identity of these stereoisomers, a control experiment may be performed in the presence of a chiral catalyst. One of the isomers of the chiral catalyst will oppose the enantioselectivity imparted by the pantolactonate, leading to increased production of the minor-stereoisomer that would arise from imperfect enantiocontrol by the pantolactonate. However, due to the inherent *cis/trans* diastereoselectivity of donor/acceptor carbenes, the ratio of *cis/trans* stereoisomers is not affected. By comparing distinctive peaks in the stereo-scrambled product to the crude reaction mixture of the chiral reaction the asymmetric induction of the chiral-auxiliary reaction may be determined unambiguously (**Figure s4**).

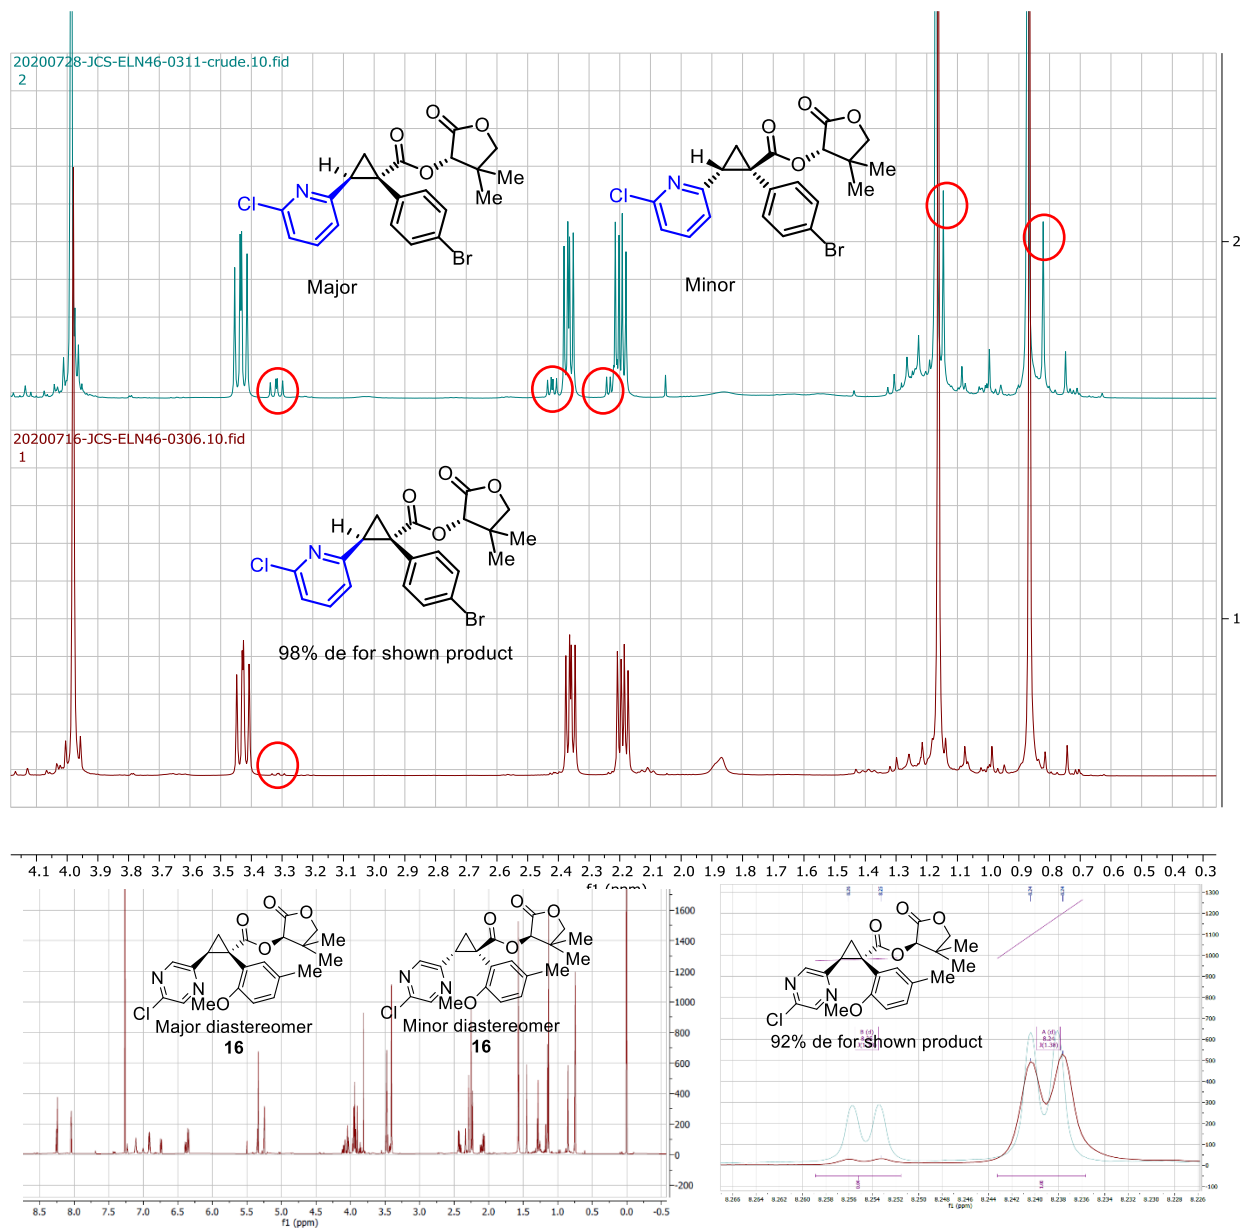

**Figure S4a.** Determination of diastereomeric excess of compound **9** based on identification of peaks in the reaction crude (Red) corresponding to the minor stereo-isomer due to imperfect enantiocontrol. The benzylic cyclopropyl proton gives the clearest determination of %de due to its separation from the major stereoisomer in the crude spectrum. Regardless several characteristic peaks of the minor stereoisomer are observed in the stereo-scrambled product (Blue) as circled in red. The scrambled product was obtained from the reaction between **S17** and **66** in the presence of a 1:1 mixture of Rh2(S-DOSP)4 and Rh2(R-DOSP)4 (1.0 mol % total catalyst loading), in CH<sub>2</sub>Cl<sub>2</sub> at rt for 24hr. Diastereomeric excess is determined by subtracting the integration of the minor stereoisomer from the normalized integration of the major stereoisomer. **S4b.** For compounds bearing an *ortho*-substituent, comparison of protons in the aryl region corresponding to the azaheterocycle may be used for determination of diastereomeric excess due to the lack of surrounding clutter. Diastereo-scrambled product products were prepared using blue-light to generate the carbene in absence of a chiral environment, the example shown is the reaction between **S18** and 2-chloro-5-ethenyl-pyrimidine (Enamine) in CH<sub>2</sub>Cl<sub>2</sub> under blue light irradiation at rt for 24hr.

**5.1.1: Crude  $^1\text{H}$  NMRs of *R*-pantolactonate cyclopropanes for %d.e determination:**  
**Compound 8**

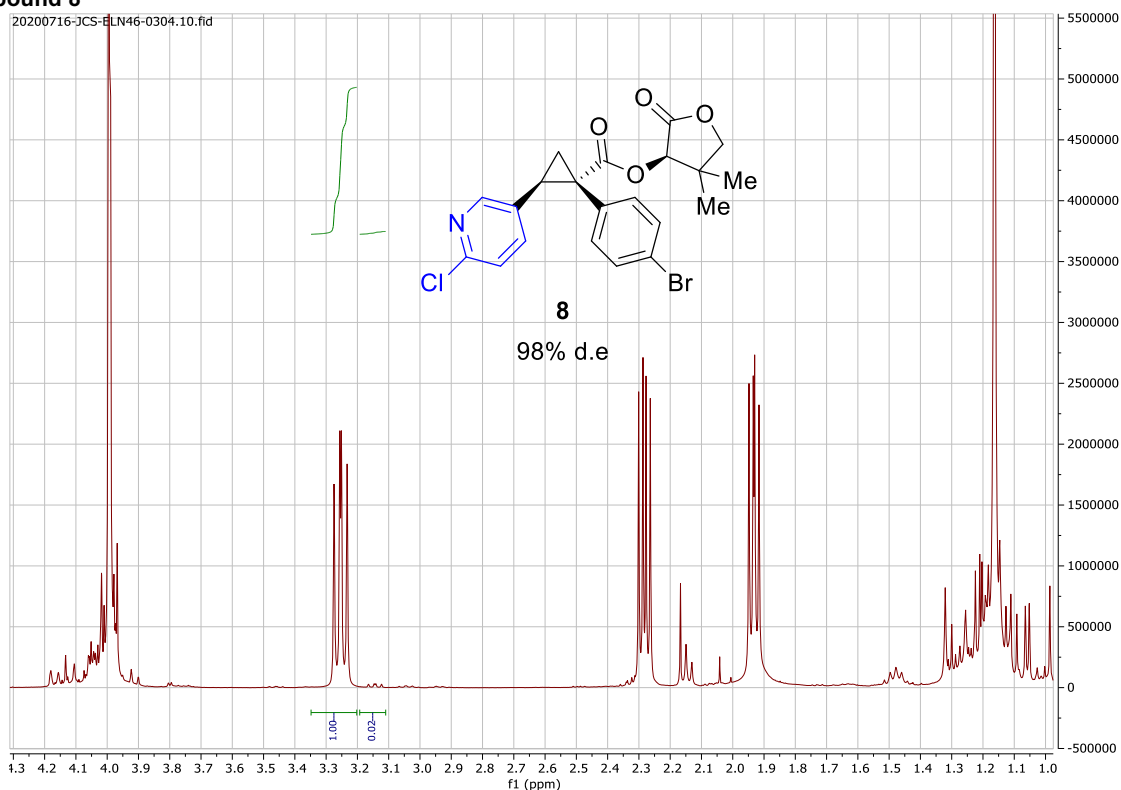

**Compound 9**

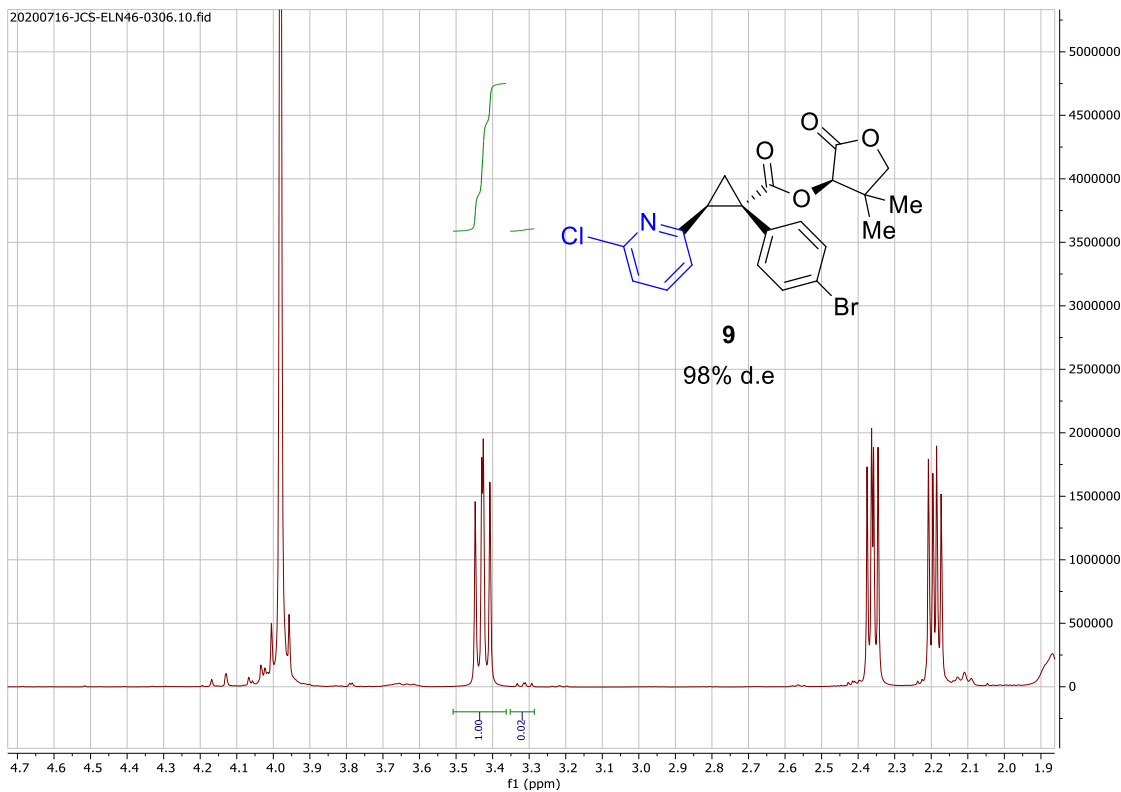

### Compound 10

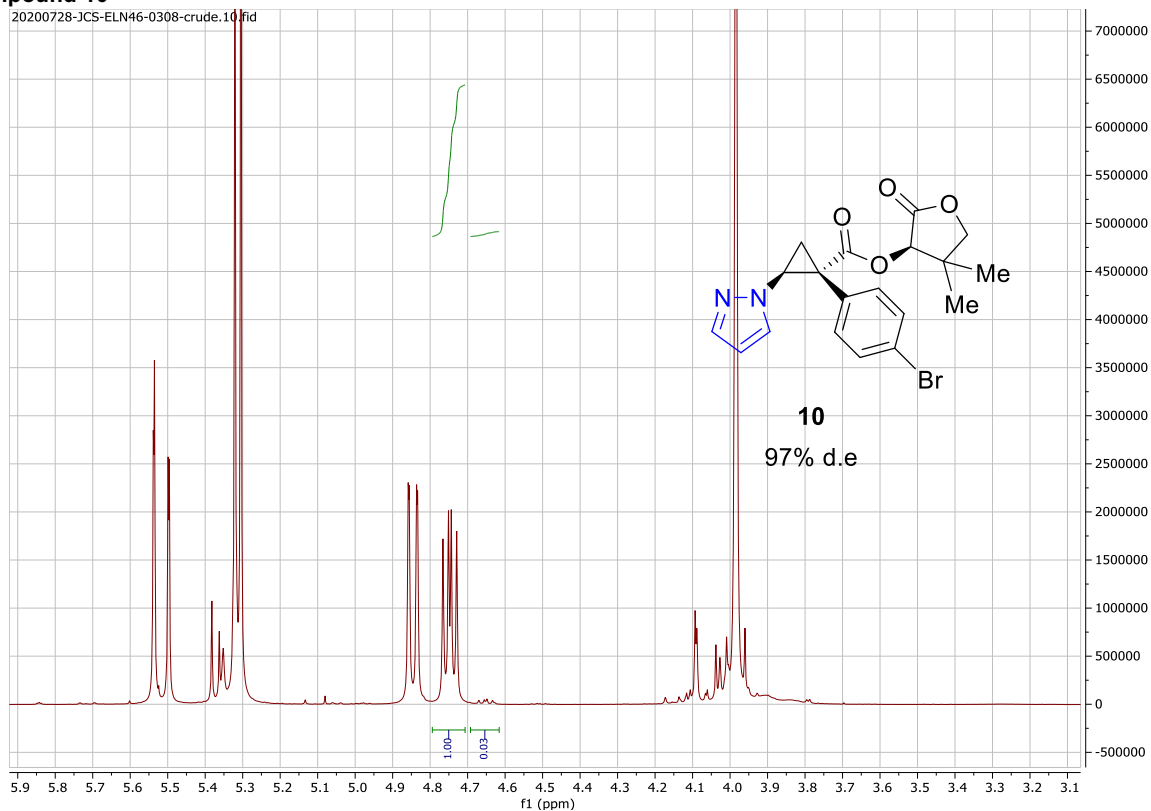

### Compound 11

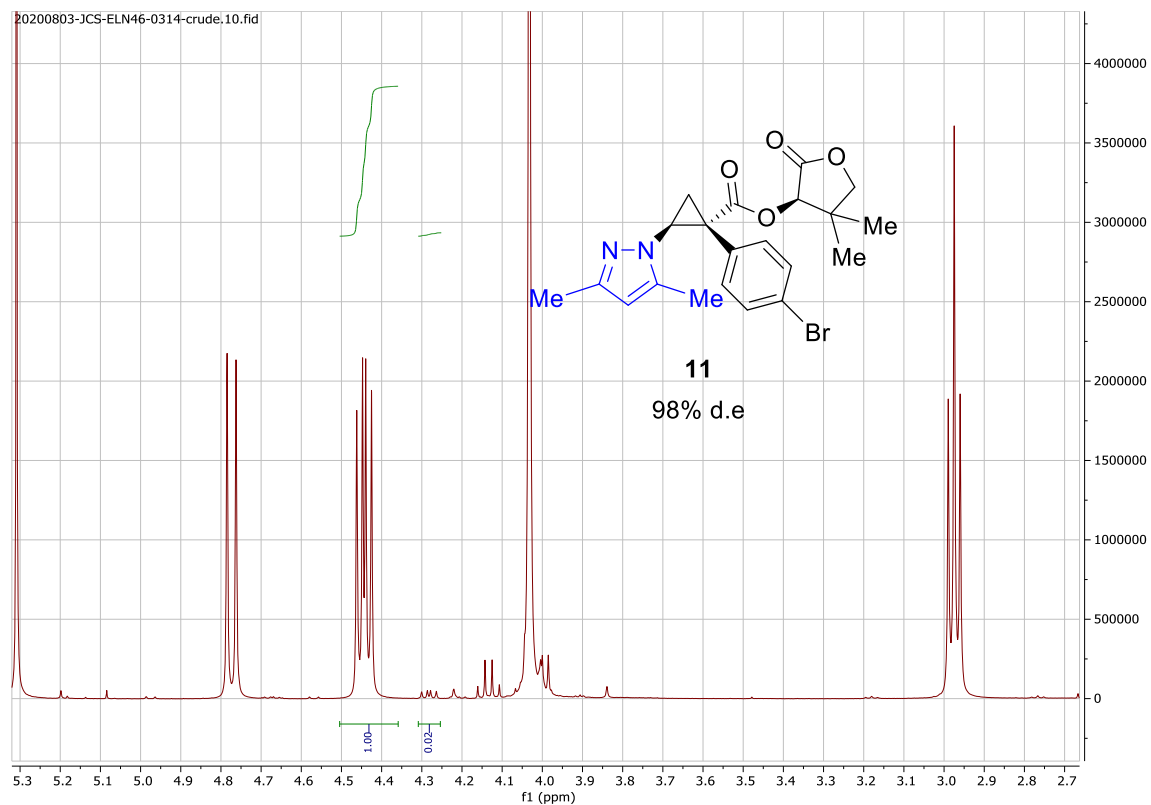

Compound 12:

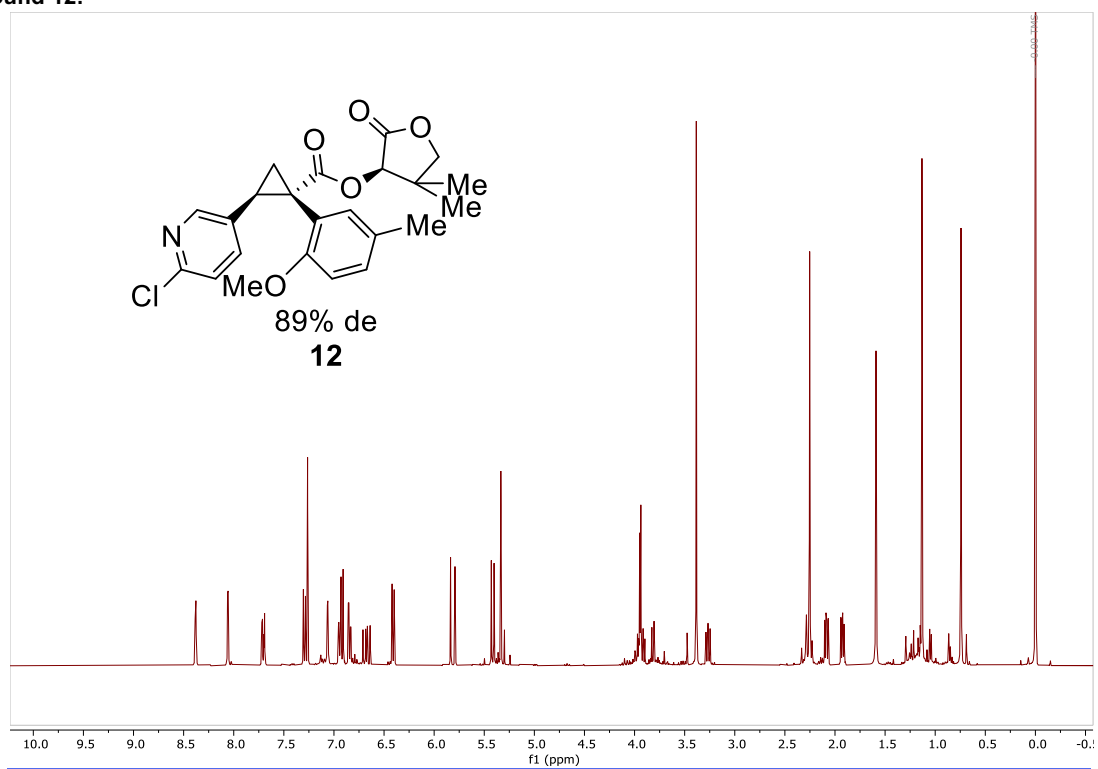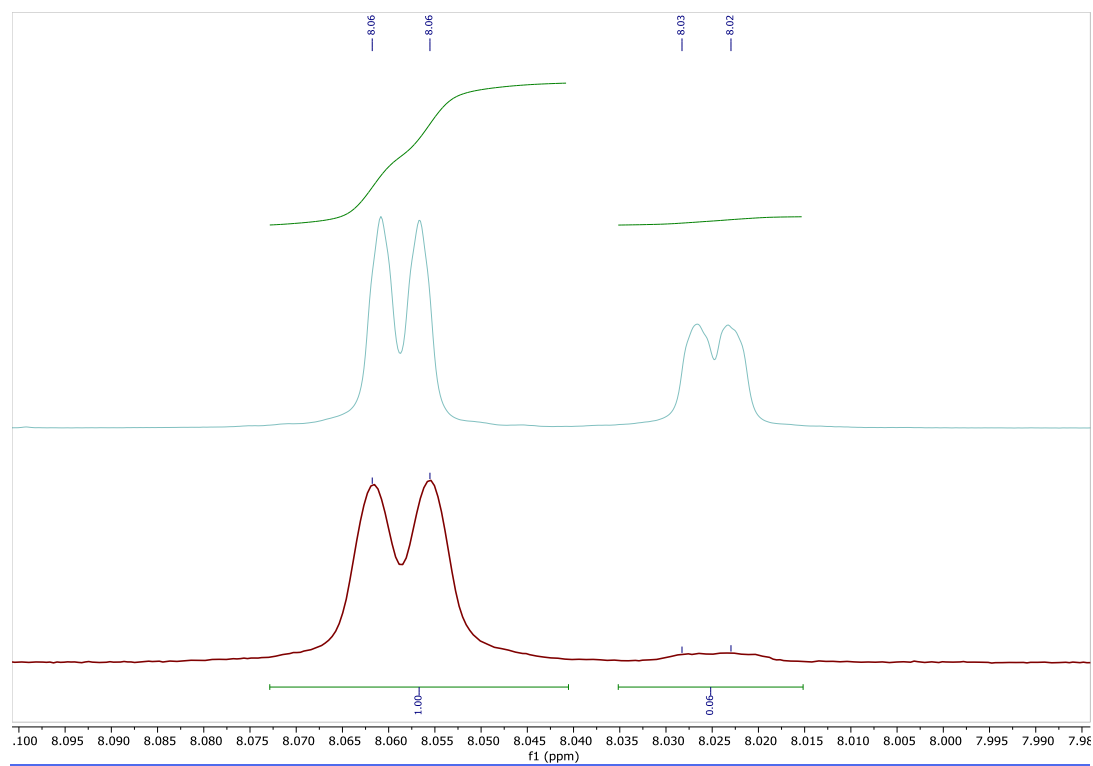

Compound 13:

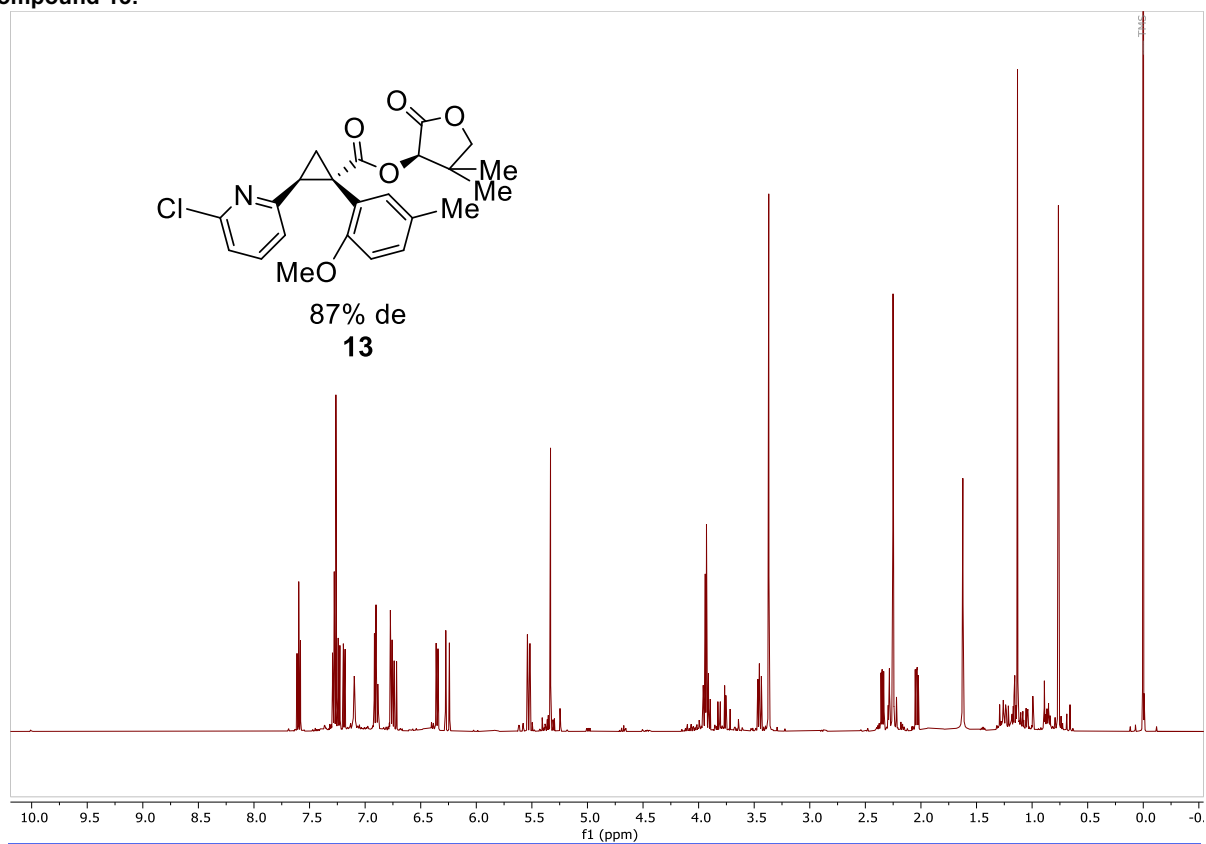

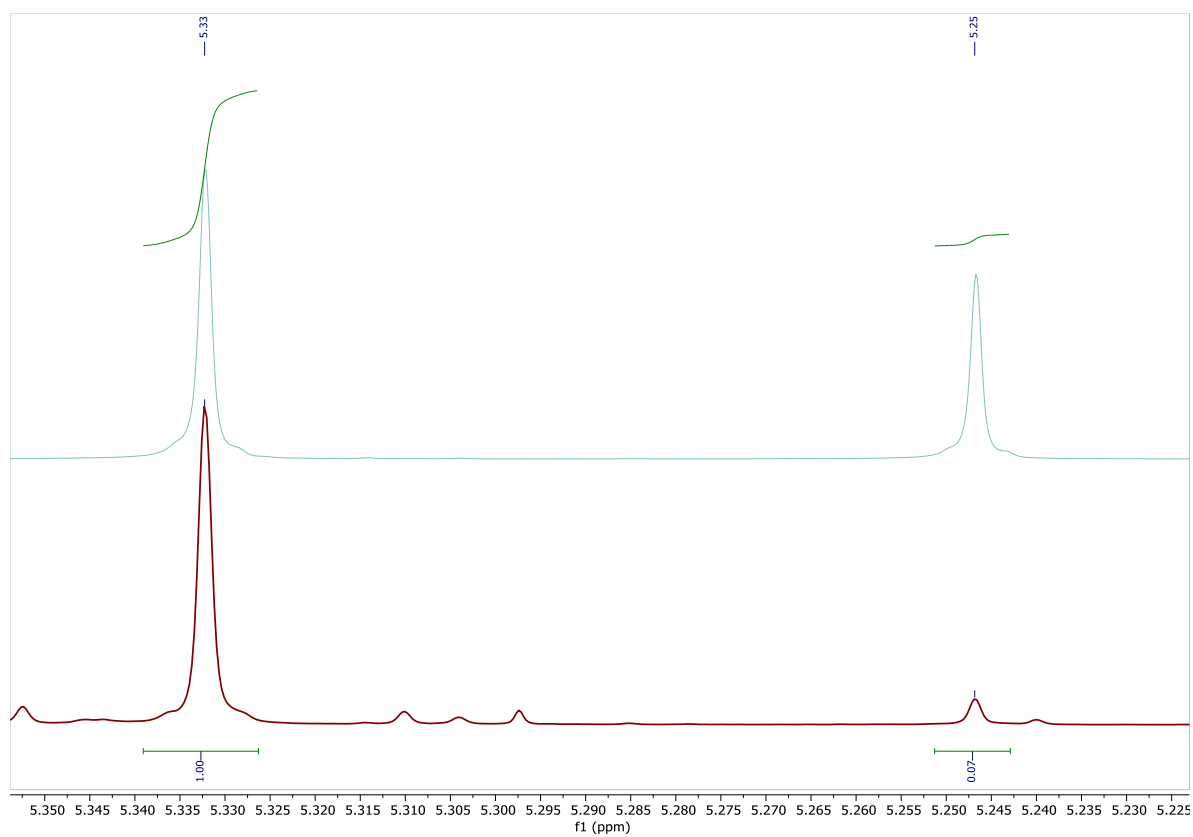

**Compound 14:**

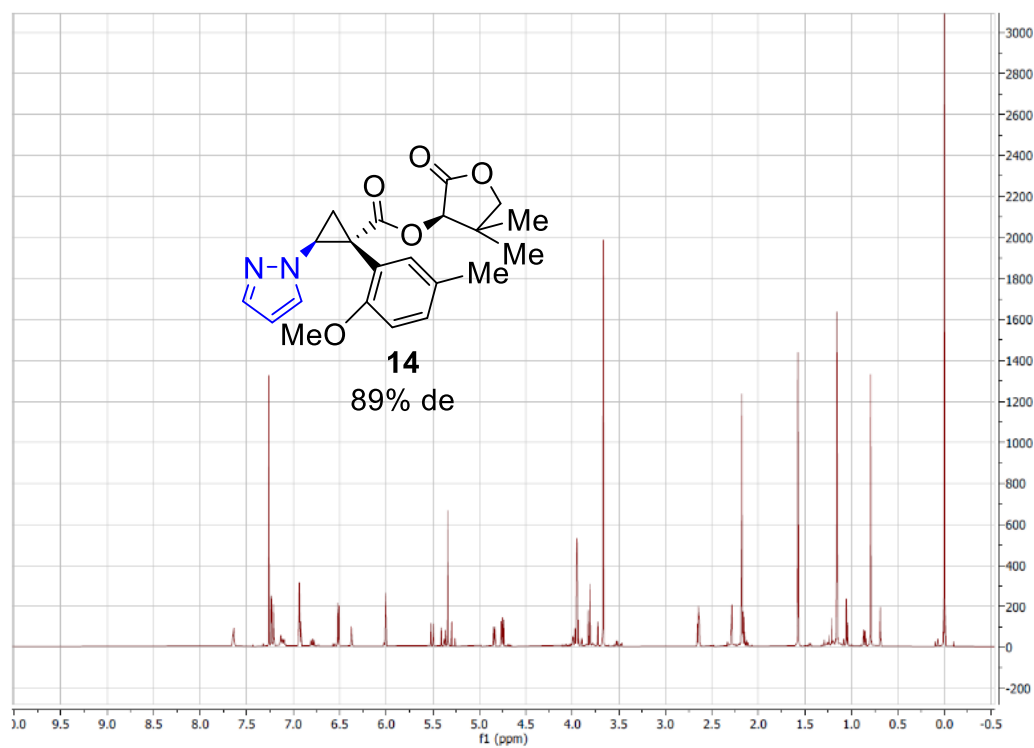

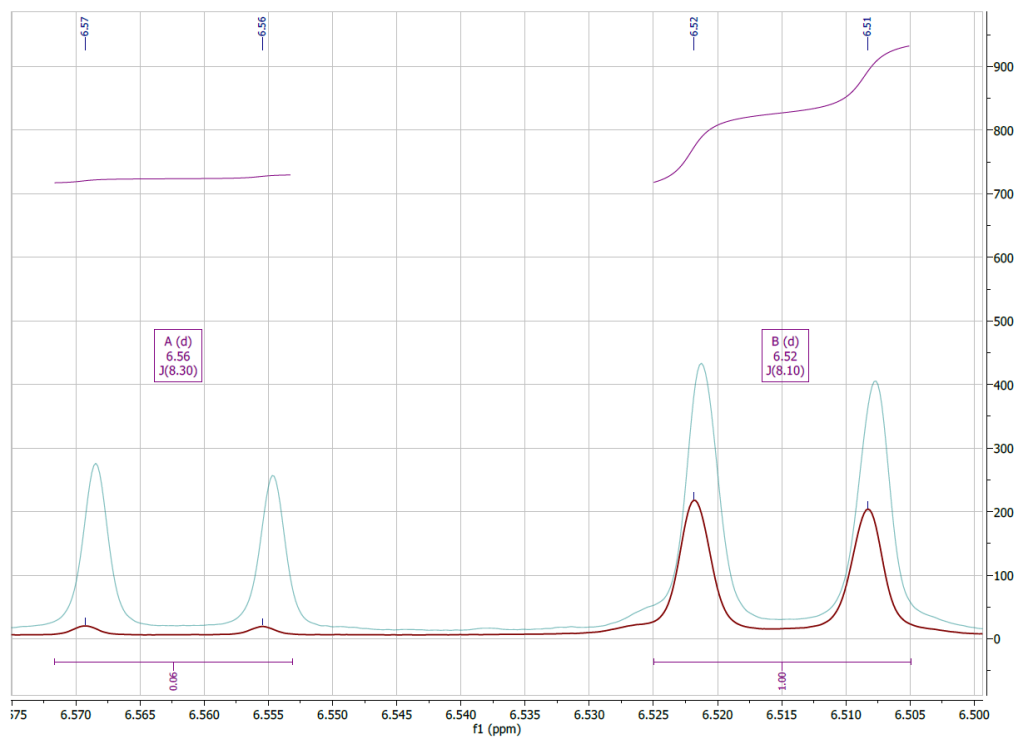

**Compound 15:**

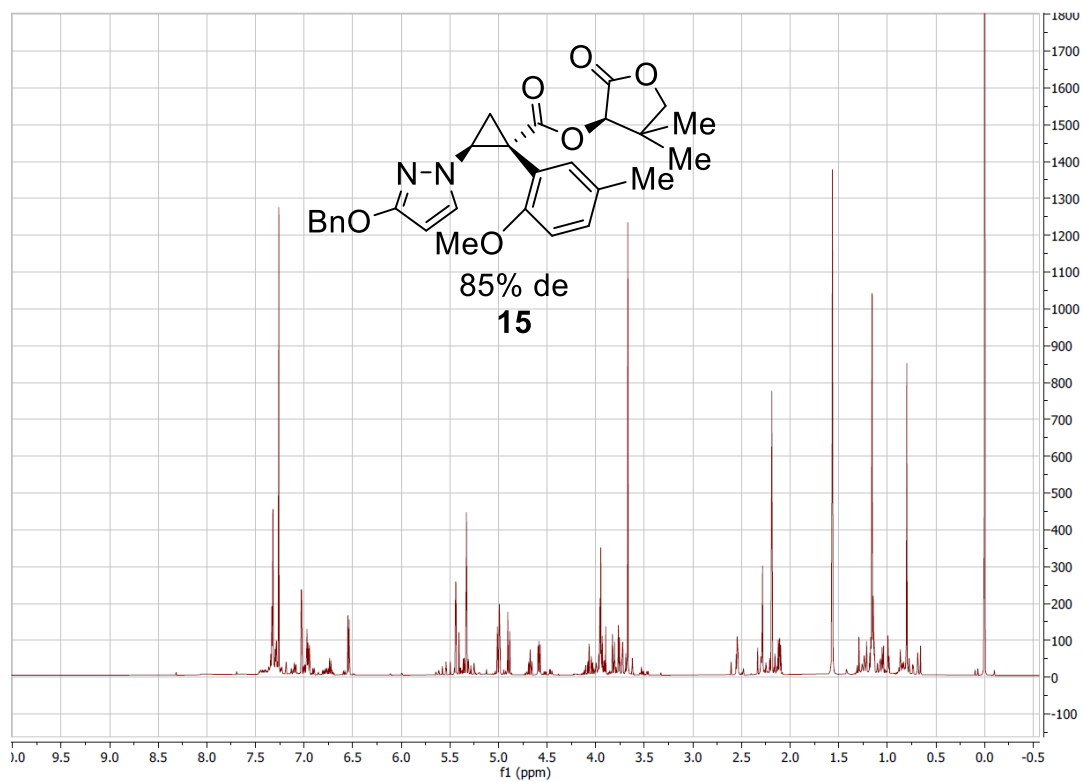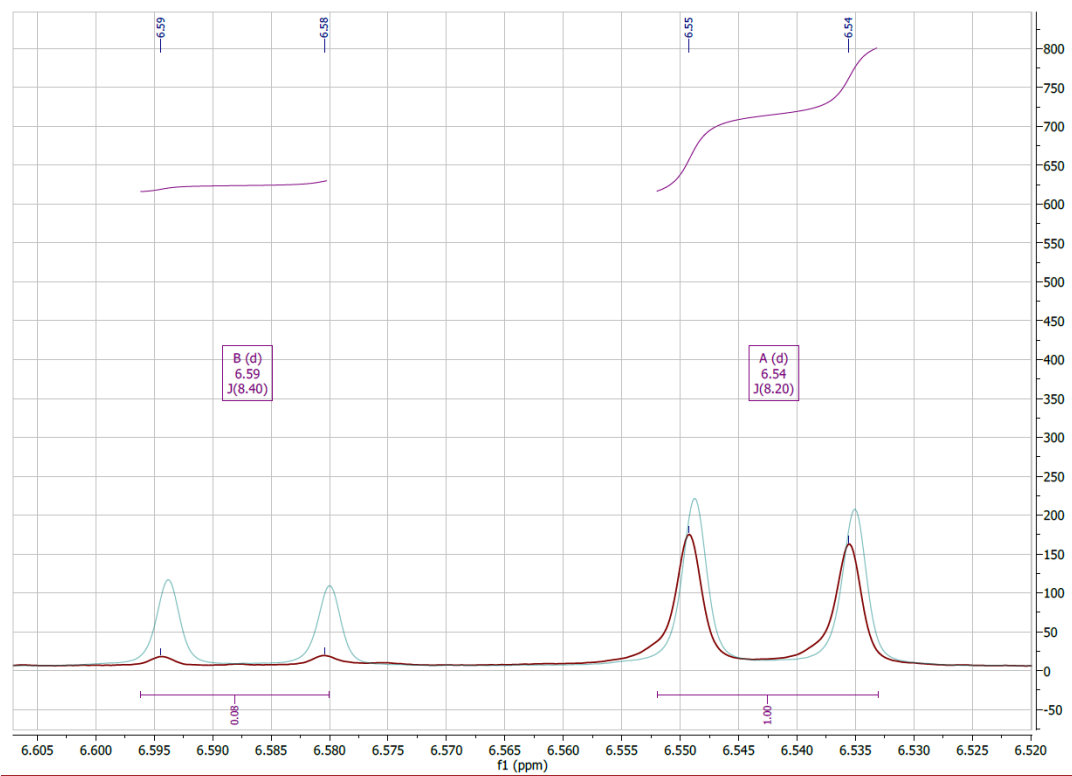

Compound 16:

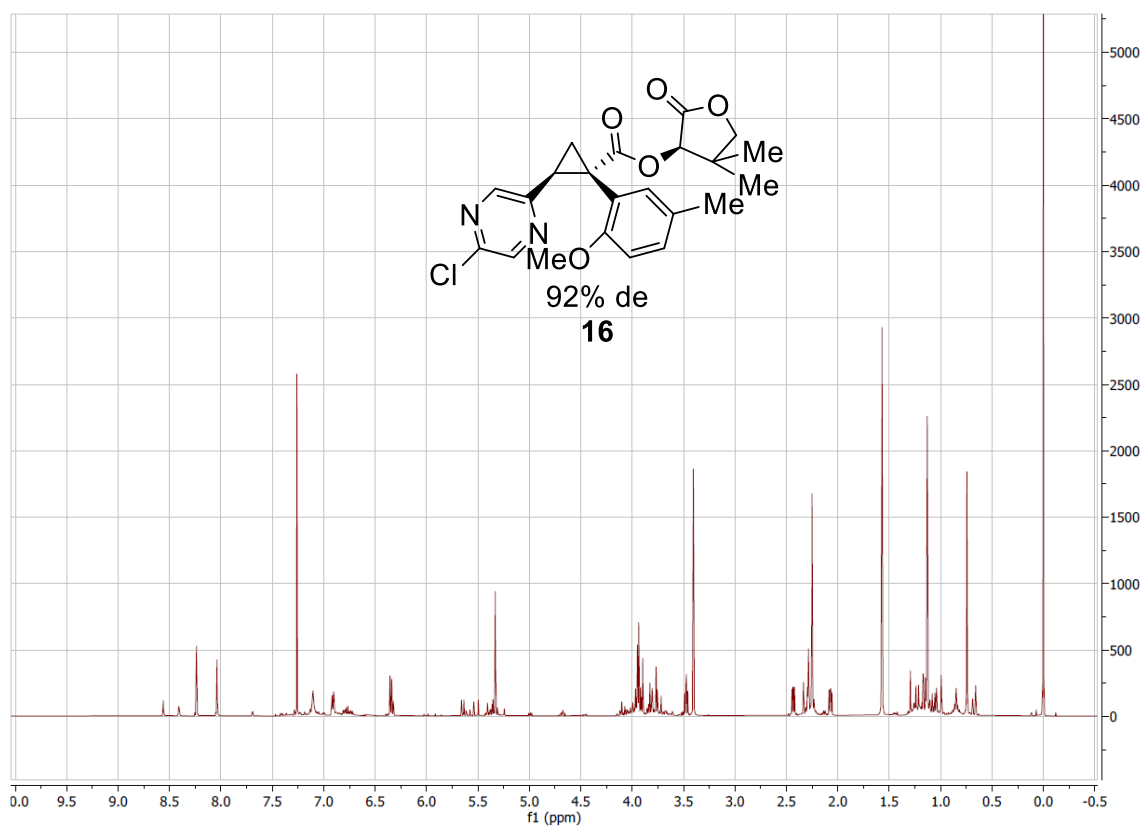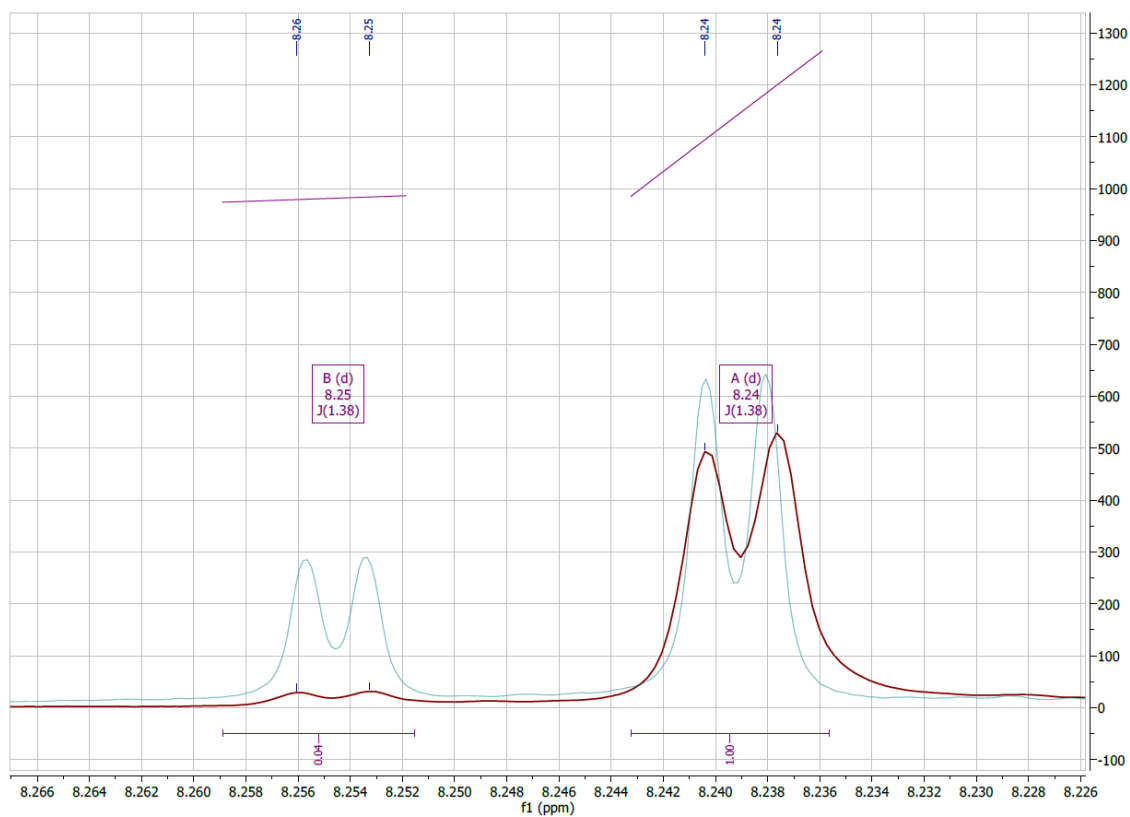

**5.2: Enantioselectivity of cyclopropanes synthesized with chiral catalysts was determined by chiral HPLC, UHPLC, or SFC.**

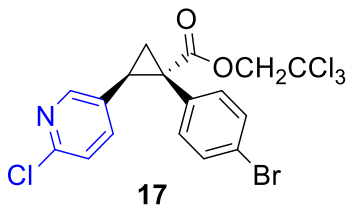

**Racemic trace:**

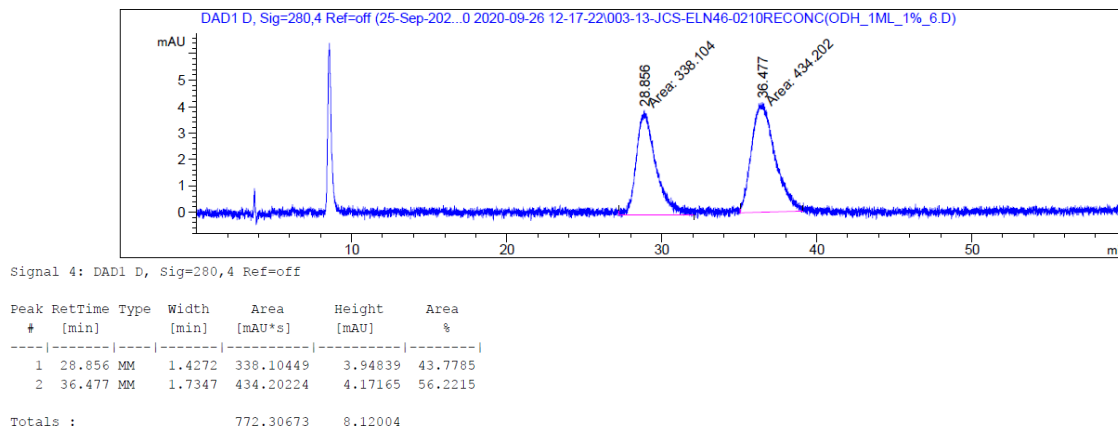

**25 °C, 0.5 mol % Rh<sub>2</sub>(*R-p*-Ph-TPCP)<sub>4</sub>, reaction performed according to procedure 3.2 with (MeO)<sub>2</sub>CO as solvent**

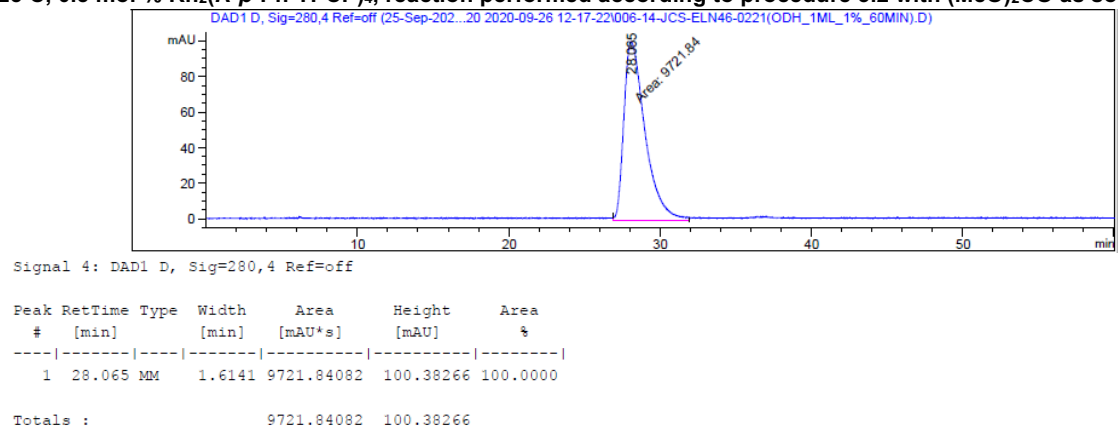

25 °C, 0.5 mol % Rh<sub>2</sub>(*R*-*p*-Ph-TPCP)<sub>4</sub>, reaction performed according to procedure 3.2 with CH<sub>2</sub>Cl<sub>2</sub> as solvent

**Chromatogram :**

**JCS-ELN46-0211(ODH\_1ML\_1%\_60MIN)11\_chann**

9/12  
 Method : Prostar LC System  
 Method : ADH\_30min\_1mL\_1%-230nm  
 User : User1

Acquired : 2/3/2020 5:14:08 PM  
 Processed : 2/4/2020 12:14:28 PM  
 Printed : 9/12/2020 12:01:47 PM

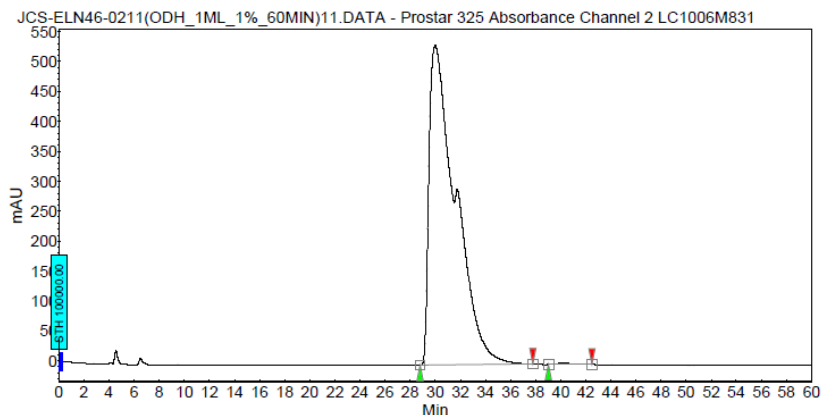

**Peak results :**

| Index | Name    | Time [Min] | Quantity [% Area] | Height [mAU] | Area [mAU.Min] | Area % [%] |
|-------|---------|------------|-------------------|--------------|----------------|------------|
| 1     | UNKNOWN | 29.99      | 99.72             | 533.4        | 1307.9         | 99.723     |
| 2     | UNKNOWN | 40.16      | 0.28              | 2.2          | 3.6            | 0.277      |
| Total |         |            | 100.00            | 535.6        | 1311.5         | 100.000    |

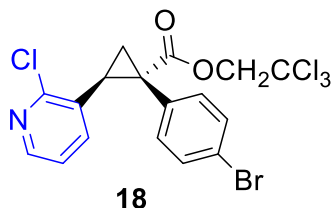

**Racemic trace:**

**Chromatogram :**

**JCS-ELN46-0224(ADH\_1ML\_1%\_60MIN)31\_chann**

9/12  
 Method : Prostar LC System  
 Method : DACHDNB\_30min\_1mL\_1%-230nm  
 User : User1

Acquired : 2/7/2020 6:12:59 AM  
 Processed : 2/8/2020 11:36:01 AM  
 Printed : 9/12/2020 11:57:24 AM

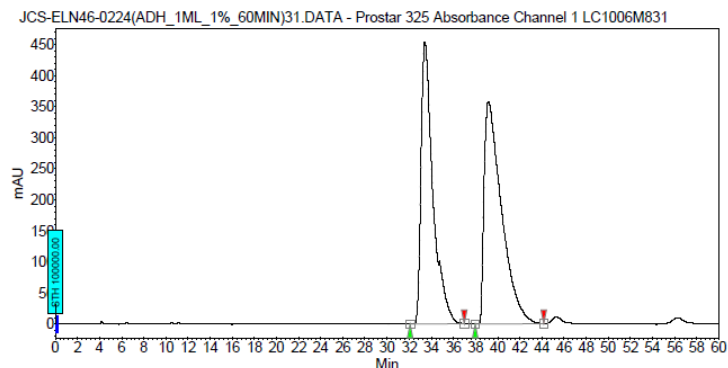

**Peak results :**

| Index | Name    | Time [Min] | Quantity [% Area] | Height [mAU] | Area [mAU.Min] | Area % [%] |
|-------|---------|------------|-------------------|--------------|----------------|------------|
| 1     | UNKNOWN | 33.41      | 46.30             | 453.4        | 566.0          | 46.268     |
| 2     | UNKNOWN | 39.16      | 53.70             | 358.0        | 656.4          | 53.702     |
| Total |         |            | 100.00            | 811.5        | 1222.4         | 100.000    |

25 °C, 0.5 mol % Rh<sub>2</sub>(*R*-*p*-Ph-TPCP)<sub>4</sub>, reaction performed according to procedure 3.2

Chromatogram :

JCS-ELN46-0225(ADH\_1ML\_1%\_60min)76\_chann

Method : Prostar LC System  
Method : DACHDNB\_30min\_1mL\_1%-230nm  
User : User1

Acquired : 2/8/2020 7:25:39 AM  
Processed : 2/8/2020 11:36:31 AM  
Printed : 9/12/2020 11:57:09 AM

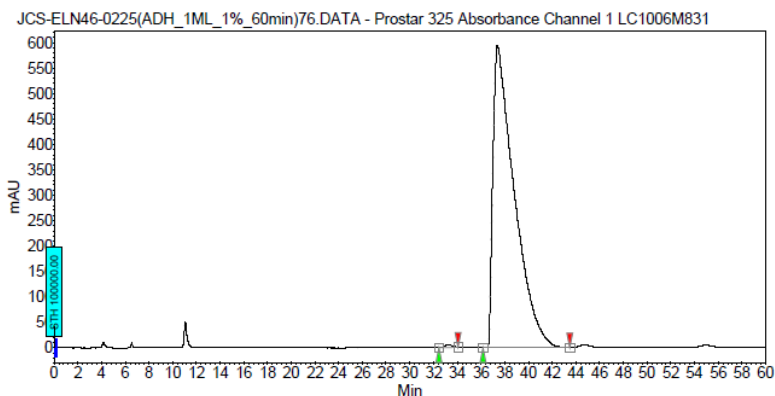

Peak results :

| Index | Name    | Time [Min] | Quantity [% Area] | Height [mAU] | Area [mAU.Min] | Area % [%] |
|-------|---------|------------|-------------------|--------------|----------------|------------|
| 1     | UNKNOWN | 33.25      | 0.31              | 5.4          | 3.9            | 0.314      |
| 2     | UNKNOWN | 37.38      | 99.69             | 594.2        | 1238.7         | 99.686     |
| Total |         |            | 100.00            | 599.6        | 1242.6         | 100.000    |

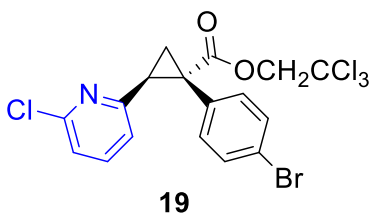

Racemic trace:

Chromatogram :

JCS-ELN46-0226(ADH\_1ML\_1%\_60MIN)34\_chann

Method : Prostar LC System  
Method : DACHDNB\_30min\_1mL\_1%-230nm  
User : User1

Acquired : 2/7/2020 8:01:53 AM  
Processed : 9/12/2020 11:56:08 AM  
Printed : 9/12/2020 11:56:13 AM

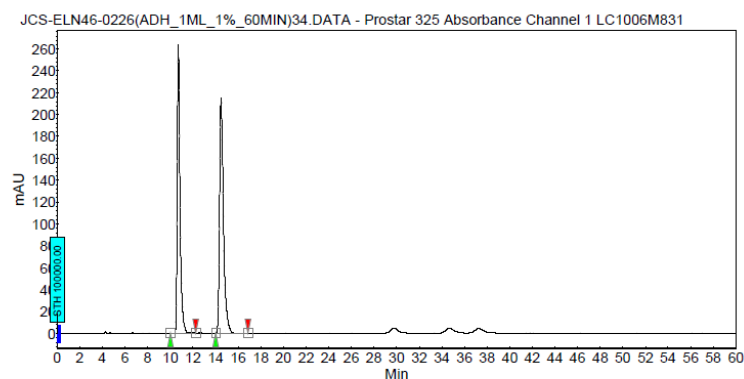

Peak results :

| Index | Name    | Time [Min] | Quantity [% Area] | Height [mAU] | Area [mAU.Min] | Area % [%] |
|-------|---------|------------|-------------------|--------------|----------------|------------|
| 1     | UNKNOWN | 10.71      | 47.51             | 263.2        | 75.0           | 47.514     |
| 2     | UNKNOWN | 14.49      | 52.49             | 214.9        | 82.9           | 52.486     |
| Total |         |            | 100.00            | 478.1        | 157.9          | 100.000    |

25 °C, 0.5 mol % Rh<sub>2</sub>(*R*-*p*-Ph-TPCP)<sub>4</sub>, reaction performed according to procedure 3.2

**Chromatogram :**  
**JCS-ELN46-0227(ADH\_1ML\_1%\_30min)79\_chann**

Item : Prostar LC System  
 Method : DACHDNB\_30min\_1mL\_1%-230nm  
 User : User1  
 Acquired : 2/8/2020 9:14:11 AM  
 Processed : 9/12/2020 11:56:41 AM  
 Printed : 9/12/2020 11:56:45 AM

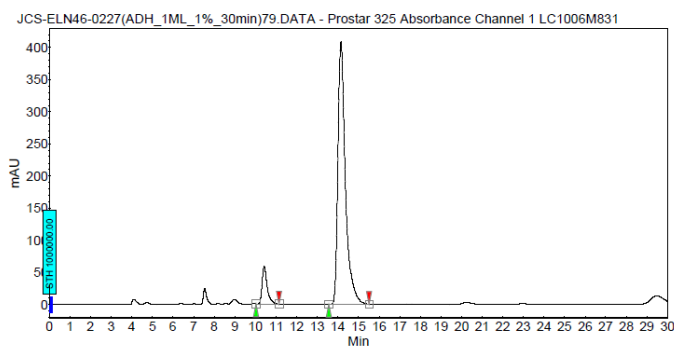

**Peak results :**

| Index | Name    | Time [Min] | Quantity [% Area] | Height [mAU] | Area [mAU.Min] | Area % [%] |
|-------|---------|------------|-------------------|--------------|----------------|------------|
| 2     | UNKNOWN | 10.42      | 8.92              | 58.8         | 16.7           | 8.916      |
| 7     | UNKNOWN | 14.14      | 91.08             | 408.1        | 170.8          | 91.084     |
| Total |         |            | 100.00            | 467.0        | 187.5          | 100.000    |

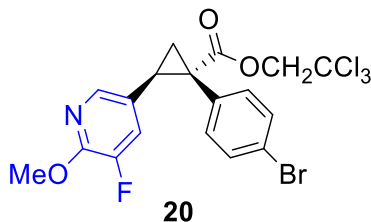

**Racemic trace:**

**Chromatogram :**  
**JCS-ELN46-0228(ODH\_1ML\_1%\_60MIN)9\_channe**

Item : Prostar LC System  
 Method : ADH\_30min\_1mL\_1%-230nm  
 User : User1  
 Acquired : 2/8/2020 6:25:51 PM  
 Processed : 2/8/2020 11:39:19 AM  
 Printed : 9/12/2020 11:54:43 AM

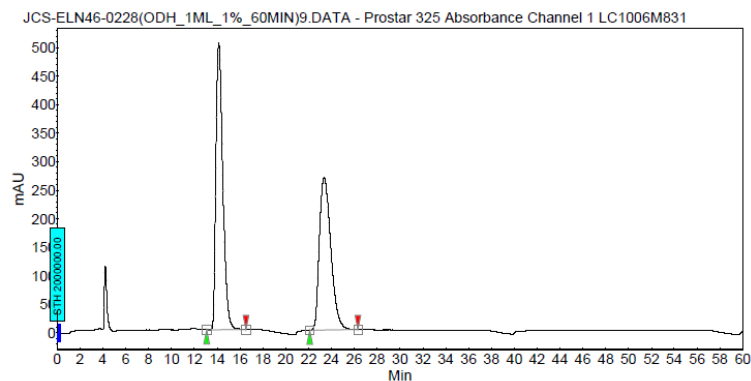

**Peak results :**

| Index | Name    | Time [Min] | Quantity [% Area] | Height [mAU] | Area [mAU.Min] | Area % [%] |
|-------|---------|------------|-------------------|--------------|----------------|------------|
| 1     | UNKNOWN | 14.14      | 53.42             | 502.8        | 357.7          | 53.415     |
| 2     | UNKNOWN | 23.37      | 46.58             | 268.3        | 312.0          | 46.585     |
| Total |         |            | 100.00            | 771.1        | 669.7          | 100.000    |

25 °C, 0.5 mol % Rh<sub>2</sub>(*R*-*p*-Ph-TPCP)<sub>4</sub>, reaction performed according to procedure 3.2

**Chromatogram :**  
**JCS-ELN46-0229(ODH\_1ML\_30MIN\_1%)54\_chann**

Method: Prostar LC System  
 Method: ADH\_30min\_1mL\_1%-230nm  
 User: User1  
 Acquired: 2/7/2020 5:29:57 PM  
 Processed: 2/8/2020 11:40:03 AM  
 Printed: 9/12/2020 11:54:21 AM

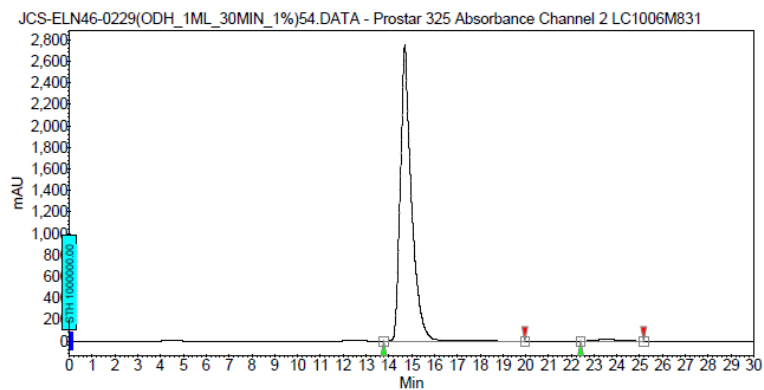

**Peak results :**

| Index | Name    | Time [Min] | Quantity [% Area] | Height [mAU] | Area [mAU.Min] | Area % [%] |
|-------|---------|------------|-------------------|--------------|----------------|------------|
| 2     | UNKNOWN | 14.70      | 99.01             | 2751.0       | 1541.2         | 99.011     |
| 1     | UNKNOWN | 23.54      | 0.99              | 15.0         | 15.4           | 0.989      |
| Total |         |            | 100.00            | 2766.9       | 1556.6         | 100.000    |

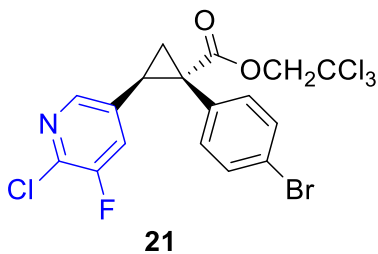

**Racemic trace:**

**Chromatogram :**  
**JCS-ELN46-0230(ODH\_1ML\_1%\_60MIN)12\_chann**

Method: Prostar LC System  
 Method: ADH\_30min\_1mL\_1%-230nm  
 User: User1  
 Acquired: 2/6/2020 8:14:14 PM  
 Processed: 2/8/2020 11:38:02 AM  
 Printed: 9/12/2020 11:54:07 AM

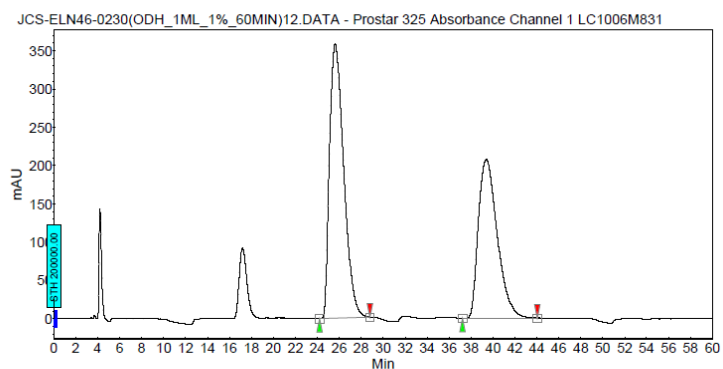

**Peak results :**

| Index | Name    | Time [Min] | Quantity [% Area] | Height [mAU] | Area [mAU.Min] | Area % [%] |
|-------|---------|------------|-------------------|--------------|----------------|------------|
| 1     | UNKNOWN | 25.63      | 56.49             | 357.9        | 537.0          | 56.492     |
| 2     | UNKNOWN | 39.39      | 43.51             | 207.4        | 413.6          | 43.508     |
| Total |         |            | 100.00            | 565.3        | 950.6          | 100.000    |

**25 °C, 0.5 mol % Rh<sub>2</sub>(*R*-*p*-Ph-TPCP)<sub>4</sub>, reaction performed according to procedure 3.2**

**Chromatogram :**  
**JCS-ELN46-0231(ODH\_1ML\_60MIN\_1%)57\_chann**

Method : Prostar LC System  
 Method : ADH\_30min\_1ml\_1%-230nm  
 User : User1

Acquired : 2/7/2020 6:47:17 PM  
 Processed : 2/8/2020 11:38:42 AM  
 Printed : 9/12/2020 11:53:49 AM

JCS-ELN46-0231(ODH\_1ML\_60MIN\_1%)57.DATA - Prostar 325 Absorbance Channel 2 LC1006M831

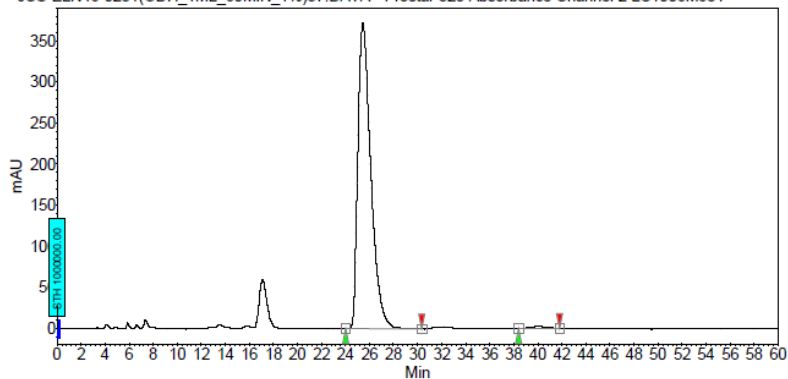

**Peak results :**

| Index | Name    | Time [Min] | Quantity [% Area] | Height [mAU] | Area [mAU.Min] | Area % [%] |
|-------|---------|------------|-------------------|--------------|----------------|------------|
| 2     | UNKNOWN | 25.44      | 99.08             | 371.7        | 464.2          | 99.076     |
| 1     | UNKNOWN | 40.08      | 0.92              | 2.8          | 4.3            | 0.924      |
| Total |         |            | 100.00            | 374.5        | 468.5          | 100.000    |

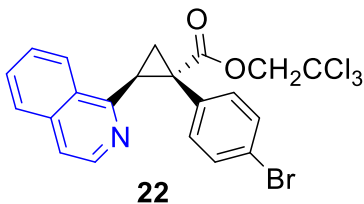

**Racemic trace:**

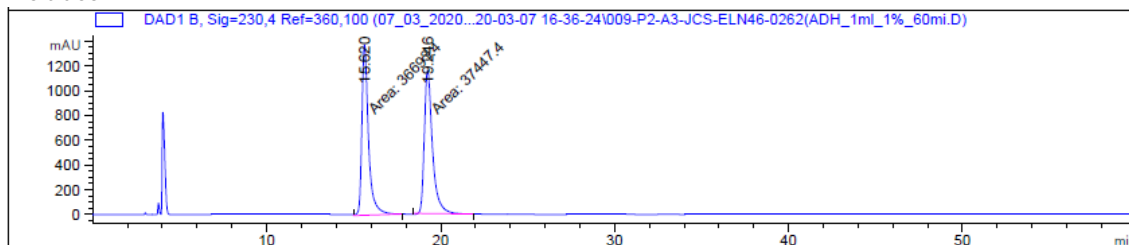

Signal 2: DAD1 B, Sig=230,4 Ref=360,100

| Peak # | RetTime [min] | Type | Width [min] | Area [mAU*s] | Height [mAU] | Area %  |
|--------|---------------|------|-------------|--------------|--------------|---------|
| 1      | 15.620        | MM   | 0.4448      | 3.66934e4    | 1375.04175   | 49.4915 |
| 2      | 19.246        | MM   | 0.5396      | 3.74474e4    | 1156.70520   | 50.5085 |

Totals : 7.41407e4 2531.74695

**25 °C, 0.5 mol % Rh<sub>2</sub>(*R*-*p*-Ph-TPCP)<sub>4</sub>, reaction performed according to procedure 3.2**

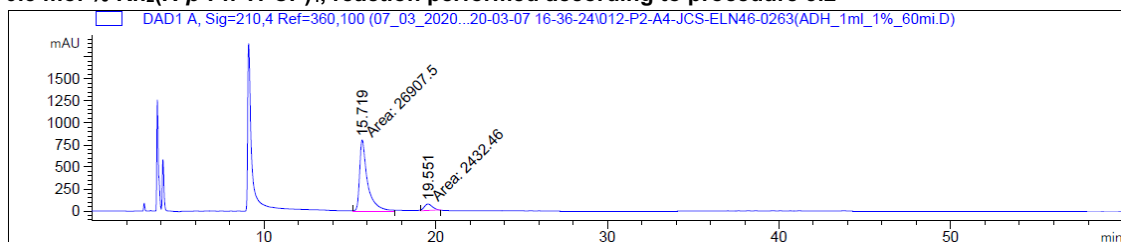

Signal 1: DAD1 A, Sig=210,4 Ref=360,100

| Peak #   | RetTime [min] | Type | Width [min] | Area [mAU*s] | Height [mAU] | Area %  |
|----------|---------------|------|-------------|--------------|--------------|---------|
| 1        | 15.719        | MM   | 0.5516      | 2.69075e4    | 812.98846    | 91.7094 |
| 2        | 19.551        | MM   | 0.5503      | 2432.45801   | 73.66758     | 8.2906  |
| Totals : |               |      |             | 2.93400e4    | 886.65604    |         |

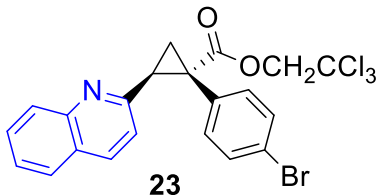

Racemic trace:

**Chromatogram :**  
**JCS-ELN46-0258(ADH\_1ML\_1%\_90MIN)36\_chann**

Method: Prostar LC System  
 Method: OJ\_30min\_1ml\_1%\_230NM  
 User: User1  
 Acquired: 3/5/2020 4:42:38 PM  
 Processed: 9/12/2020 9:53:49 AM  
 Printed: 9/12/2020 9:54:03 AM

JCS-ELN46-0258(ADH\_1ML\_1%\_90MIN)36.DATA - Prostar 325 Absorbance Channel 2 LC1006M831

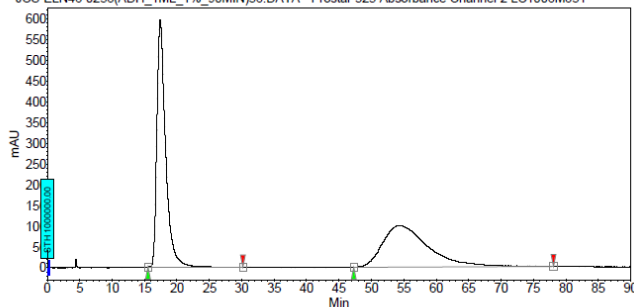

**Peak results :**

| Index | Name    | Time [Min] | Quantity [% Area] | Height [mAU] | Area [mAU.Min] | Area % [%] |
|-------|---------|------------|-------------------|--------------|----------------|------------|
| 1     | UNKNOWN | 15.72      | 52.98             | 812.3        | 827.8          | 52.980     |
| 2     | UNKNOWN | 19.21      | 47.08             | 99.8         | 824.4          | 47.080     |
| Total |         |            | 100.00            | 895.1        | 1752.3         | 100.000    |

25 °C, 0.5 mol % Rh<sub>2</sub>(*R*-*p*-Ph-TPCP)<sub>4</sub>, reaction performed according to procedure 3.2

**Chromatogram :**  
**JCS-ELN46-0259RE(ADH\_1ML\_1%\_90MIN)19\_ch**

Method: Prostar LC System  
 Method: OJ\_30min\_1ml\_1%\_230NM  
 User: User1  
 Acquired: 3/10/2020 6:10:24 PM  
 Processed: 3/11/2020 10:29:05 AM  
 Printed: 9/12/2020 9:50:41 AM

JCS-ELN46-0259RE(ADH\_1ML\_1%\_90MIN)19.DATA - Prostar 325 Absorbance Channel 2 LC1006M831

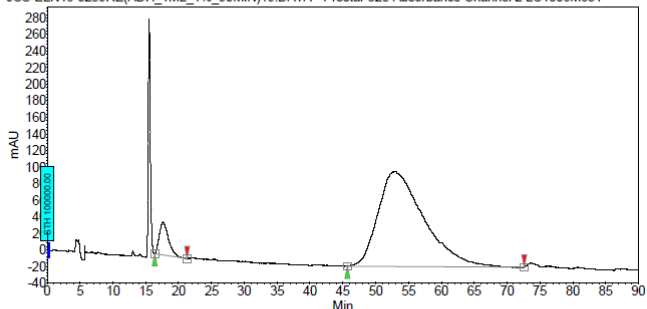

**Peak results :**

| Index | Name    | Time [Min] | Quantity [% Area] | Height [mAU] | Area [mAU.Min] | Area % [%] |
|-------|---------|------------|-------------------|--------------|----------------|------------|
| 2     | UNKNOWN | 17.62      | 6.50              | 40.0         | 64.3           | 6.502      |
| 1     | UNKNOWN | 52.99      | 93.50             | 114.5        | 925.0          | 93.498     |
| Total |         |            | 100.00            | 154.5        | 989.3          | 100.000    |

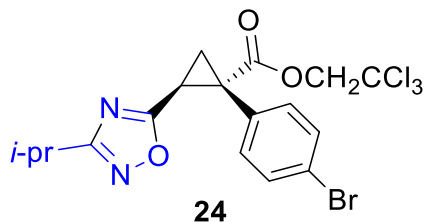

Racemic trace:

**Chromatogram :**  
**JCS-ELN46-0303(OJH\_1ML\_1%\_30MIN)3\_channe**

System : Prostar LC System  
 Method : DACHDNB\_30min\_1mL\_1%-230nm  
 User : User1

Acquired : 7/16/2020 8:42:40 PM  
 Processed : 9/12/2020 9:34:44 AM  
 Printed : 9/12/2020 9:37:17 AM

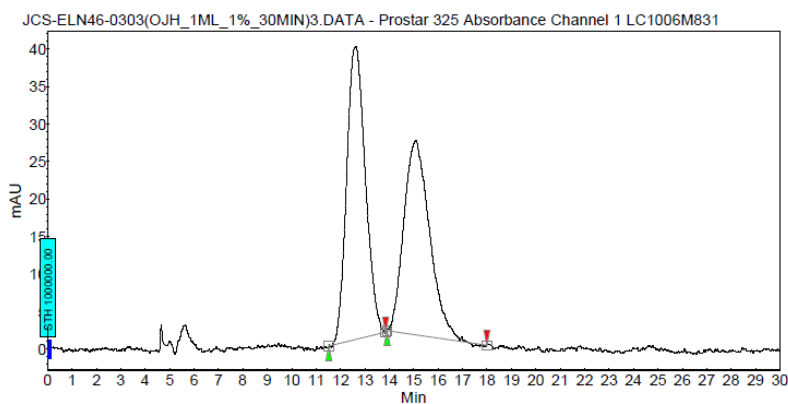

**Peak results :**

| Index | Name    | Time [Min] | Quantity [% Area] | Height [mAU] | Area [mAU.Min] | Area % [%] |
|-------|---------|------------|-------------------|--------------|----------------|------------|
| 1     | UNKNOWN | 12.63      | 52.26             | 38.9         | 34.5           | 52.261     |
| 2     | UNKNOWN | 15.08      | 47.74             | 25.9         | 31.6           | 47.739     |
| Total |         |            | 100.00            | 64.9         | 66.1           | 100.000    |

25 °C, 0.5 mol % Rh<sub>2</sub>(*R*-Ph-TPCP)<sub>4</sub>, reaction performed according to procedure 3.2

**Chromatogram :**  
**JCS-ELN46-0302A(OJH\_1ML\_1%\_30MIN)6\_chann**

System : Prostar LC System  
 Method : DACHDNB\_30min\_1mL\_1%-230nm  
 User : User1

Acquired : 7/16/2020 10:00:24 PM  
 Processed : 7/18/2020 12:09:01 PM  
 Printed : 9/12/2020 9:37:22 AM

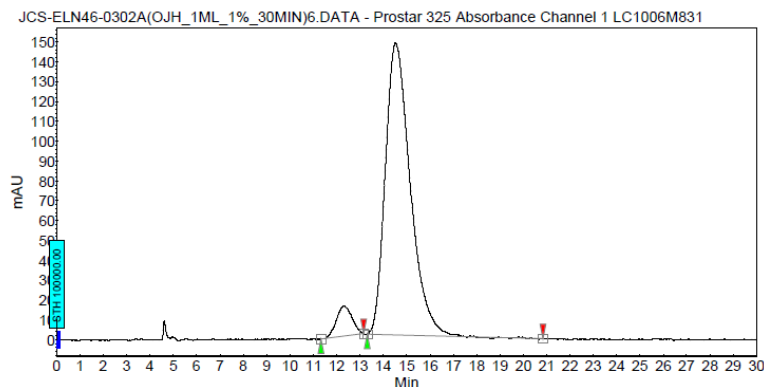

**Peak results :**

| Index | Name    | Time [Min] | Quantity [% Area] | Height [mAU] | Area [mAU.Min] | Area % [%] |
|-------|---------|------------|-------------------|--------------|----------------|------------|
| 1     | UNKNOWN | 12.33      | 5.99              | 15.0         | 11.6           | 5.990      |
| 2     | UNKNOWN | 14.52      | 94.01             | 146.9        | 182.2          | 94.010     |
| Total |         |            | 100.00            | 161.9        | 193.9          | 100.000    |

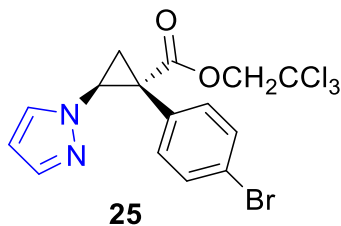

Racemic trace:

Chromatogram :  
JCS-ELN46-0309(OJH\_45min\_1ml\_1%)3\_chan

Method: Prostar LC System  
Method: DACHDNB\_30min\_1ml\_1%-230nm  
User: User1  
Acquired: 7/30/2020 1:57:01 PM  
Processed: 7/30/2020 5:45:01 PM  
Printed: 9/12/2020 9:31:34 AM

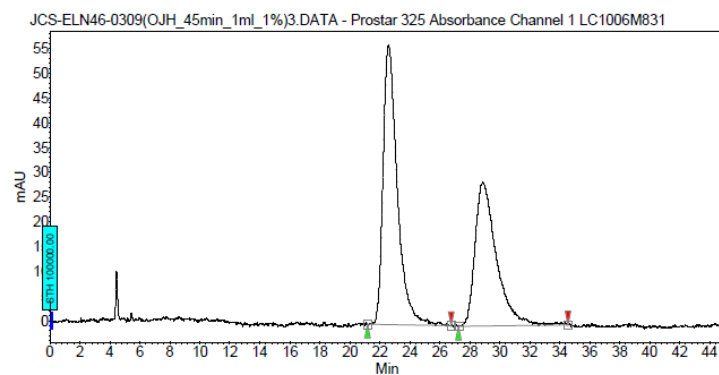

Peak results :

| Index | Name    | Time [Min] | Quantity [% Area] | Height [mAU] | Area [mAU.Min] | Area % [%] |
|-------|---------|------------|-------------------|--------------|----------------|------------|
| 1     | UNKNOWN | 22.80      | 56.44             | 56.5         | 62.2           | 56.439     |
| 2     | UNKNOWN | 28.87      | 43.56             | 29.1         | 48.0           | 43.561     |
| Total |         |            | 100.00            | 85.5         | 110.1          | 100.000    |

25 °C, 1 mol % Rh<sub>2</sub>(*R-p*-Ph-TPCP)<sub>4</sub>, reaction performed according to procedure 3.2

Chromatogram :  
JCS-ELN46-0310BRE(OJH\_45min\_1ml\_1%)6\_cha

Method: Prostar LC System  
Method: DACHDNB\_30min\_1ml\_1%-230nm  
User: User1  
Acquired: 8/1/2020 2:55:50 PM  
Processed: 8/3/2020 1:18:21 PM  
Printed: 9/12/2020 9:31:01 AM

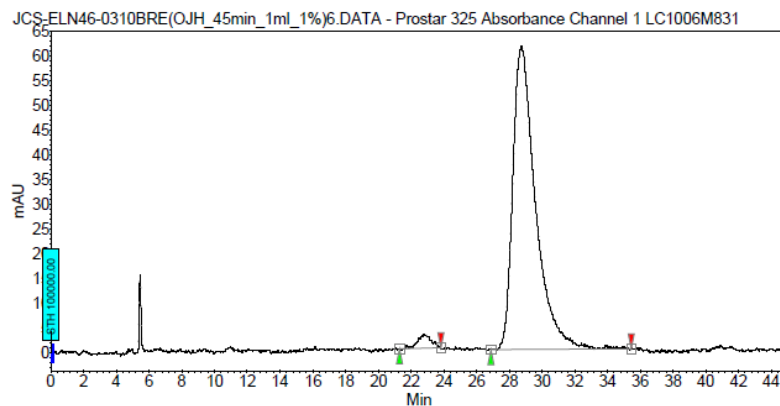

Peak results :

| Index | Name    | Time [Min] | Quantity [% Area] | Height [mAU] | Area [mAU.Min] | Area % [%] |
|-------|---------|------------|-------------------|--------------|----------------|------------|
| 1     | UNKNOWN | 22.84      | 2.62              | 2.8          | 2.7            | 2.622      |
| 2     | UNKNOWN | 28.74      | 97.38             | 61.3         | 68.5           | 97.378     |
| Total |         |            | 100.00            | 64.1         | 101.1          | 100.000    |

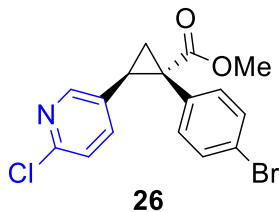

Racemic trace:

**Chromatogram :**  
**Bo-ELN36-0104(ADH\_1ML\_1%\_60MIN)8\_channel1**

System : Prostar LC System  
 Method : DADHDB\_30min\_1mL\_1%-230nm  
 User : User1

Acquired : 2/4/2020 1:08:05 PM  
 Processed : 9/21/2020 6:17:22 PM  
 Printed : 9/21/2020 6:17:25 PM

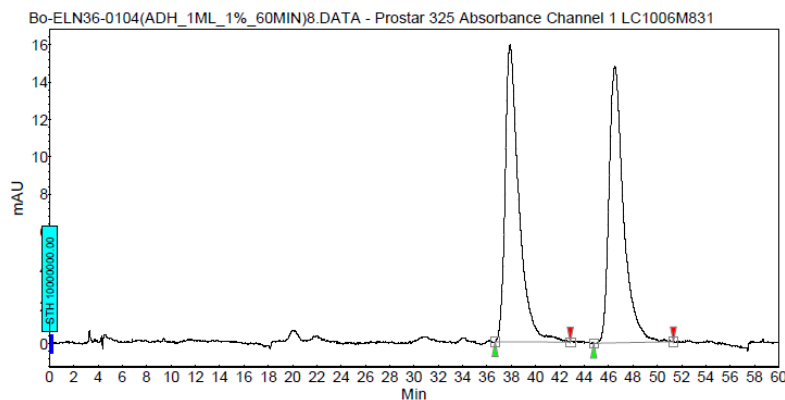

**Peak results :**

| Index | Name    | Time [Min] | Quantity [% Area] | Height [mAU] | Area [mAU.Min] | Area % [%] |
|-------|---------|------------|-------------------|--------------|----------------|------------|
| 1     | UNKNOWN | 37.89      | 50.44             | 15.9         | 20.8           | 50.437     |
| 2     | UNKNOWN | 46.52      | 49.56             | 14.8         | 20.5           | 49.563     |
| Total |         |            | 100.00            | 30.7         | 41.3           | 100.000    |

25 °C, 0.5 mol % Rh<sub>2</sub>(*R*-*p*-Ph-TPCP)<sub>4</sub>, reaction performed according to procedure 3.2

**Chromatogram :**  
**JCS-ELN46-0215(ADH\_1ML\_1%\_60MIN)10\_chann**

System : Prostar LC System  
 Method : DADHDB\_30min\_1mL\_1%-230nm  
 User : User1

Acquired : 2/4/2020 2:56:34 PM  
 Processed : 2/5/2020 9:28:29 AM  
 Printed : 9/12/2020 11:59:59 AM

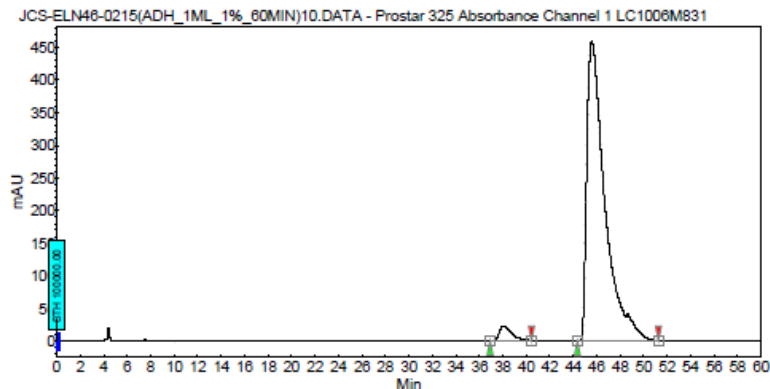

**Peak results :**

| Index | Name    | Time [Min] | Quantity [% Area] | Height [mAU] | Area [mAU.Min] | Area % [%] |
|-------|---------|------------|-------------------|--------------|----------------|------------|
| 1     | UNKNOWN | 38.06      | 3.20              | 22.9         | 27.0           | 3.197      |
| 2     | UNKNOWN | 45.59      | 96.80             | 458.6        | 818.0          | 96.803     |
| Total |         |            | 100.00            | 481.5        | 845.0          | 100.000    |

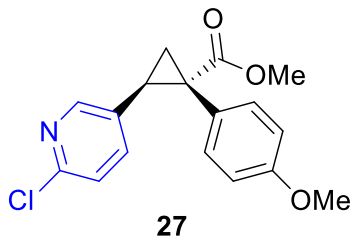

**Racemic trace:**

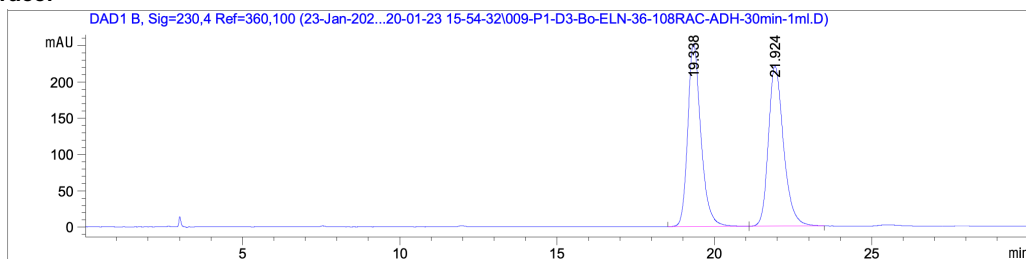

Signal 2: DAD1 B, Sig=230,4 Ref=360,100

| Peak # | RetTime [min] | Type | Width [min] | Area [mAU*s] | Height [mAU] | Area %  |
|--------|---------------|------|-------------|--------------|--------------|---------|
| 1      | 19.338        | BB   | 0.4391      | 7316.83301   | 251.73724    | 49.7532 |
| 2      | 21.924        | BB   | 0.5079      | 7389.43115   | 221.10867    | 50.2468 |

**25 °C, 0.5 mol % Rh<sub>2</sub>(*R*-*p*-Ph-TPCP)<sub>4</sub>, reaction performed according to procedure 3.2**

**Chromatogram :**

**JCS-ELN46-0232(ADH\_1ML\_3%\_30MIN)109\_chan**

Method : Prostar LC System  
 Method : DACHDNB\_30min\_1ml\_3%-230nm  
 User : User1

Acquired : 2/8/2020 6:44:06 PM  
 Processed : 2/10/2020 8:45:18 AM  
 Printed : 9/12/2020 11:53:36 AM

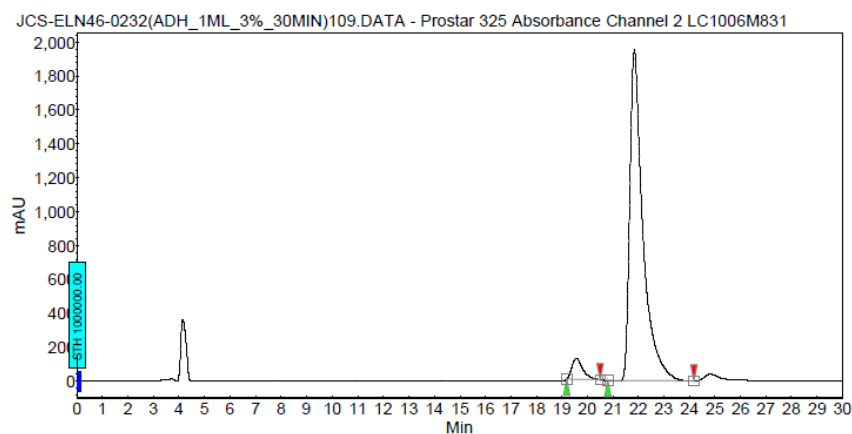

**Peak results :**

| Index | Name    | Time [Min] | Quantity [% Area] | Height [mAU] | Area [mAU.Min] | Area % [%] |
|-------|---------|------------|-------------------|--------------|----------------|------------|
| 1     | UNKNOWN | 19.57      | 5.01              | 123.8        | 61.0           | 5.010      |
| 2     | UNKNOWN | 21.84      | 94.99             | 1953.7       | 1156.0         | 94.990     |
| Total |         |            | 100.00            | 2077.5       | 1216.9         | 100.000    |

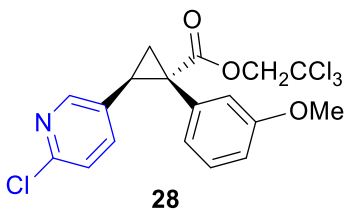

**Racemic trace:**

**Chromatogram :**  
**BO-ELN36-0102(ADH\_1ML\_5%\_45min)89\_channe**

System : Prostar LC System  
 Method : DACHDNB\_30min\_1mL\_5%\_230nm  
 User : User1  
 Acquired : 2/8/2020 2:20:55 PM  
 Processed : 9/25/2020 4:50:39 PM  
 Printed : 9/25/2020 4:50:46 PM

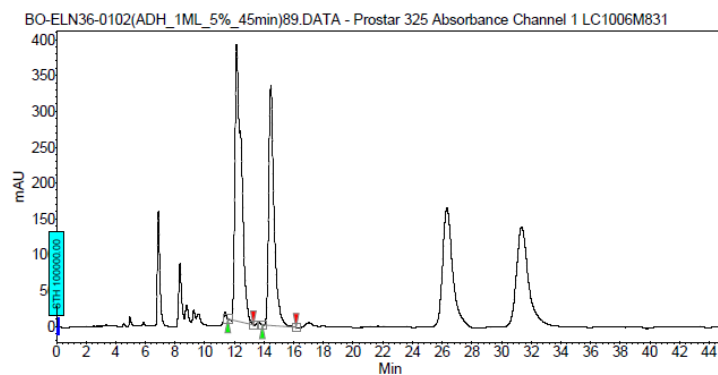

**Peak results :**

| Index | Name    | Time [Min] | Quantity [% Area] | Height [mAU] | Area [mAU.Min] | Area % [%] |
|-------|---------|------------|-------------------|--------------|----------------|------------|
| 1     | UNKNOWN | 12.15      | 57.51             | 385.2        | 192.0          | 57.512     |
| 2     | UNKNOWN | 14.45      | 42.49             | 334.2        | 141.9          | 42.488     |
| Total |         | 100.00     | 719.4             | 333.9        | 333.9          | 100.000    |

**25 °C, 0.5 mol % Rh<sub>2</sub>(*R*-*p*-Ph-TPCP)<sub>4</sub>, reaction performed according to procedure 3.2**

**Chromatogram :**  
**JCS-ELN46-0233(ADH\_1ML\_5%\_45min)92\_chann**

System : Prostar LC System  
 Method : DACHDNB\_30min\_1mL\_5%\_230nm  
 User : User1  
 Acquired : 2/8/2020 3:53:38 PM  
 Processed : 2/10/2020 8:43:26 AM  
 Printed : 9/12/2020 11:53:20 AM

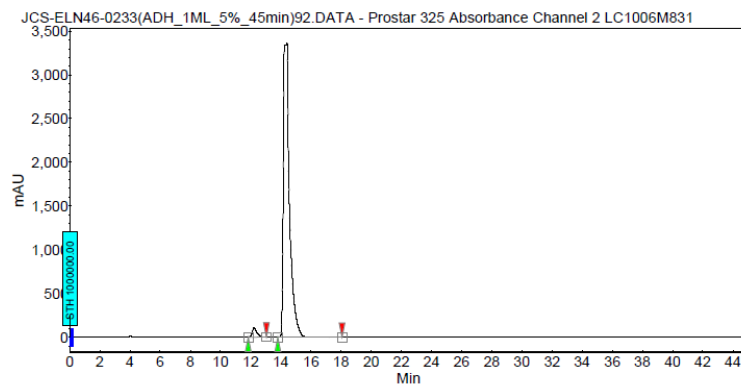

**Peak results :**

| Index | Name    | Time [Min] | Quantity [% Area] | Height [mAU] | Area [mAU.Min] | Area % [%] |
|-------|---------|------------|-------------------|--------------|----------------|------------|
| 1     | UNKNOWN | 12.23      | 2.40              | 105.1        | 39.8           | 2.404      |
| 2     | UNKNOWN | 14.43      | 97.60             | 3358.7       | 1616.3         | 97.596     |
| Total |         | 100.00     | 3463.9            | 1656.1       | 1656.1         | 100.000    |

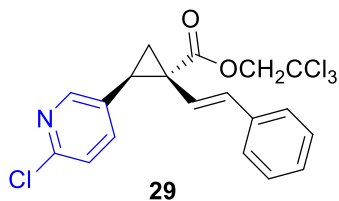

Racemic trace:

**Chromatogram :**  
**JCS-ELN46-0242A(ADH\_1ML\_3%\_60MIN)15\_cha**

Prostar LC System  
 Method : ADH\_30min\_1mL\_3%-230nm  
 User : User1

Acquired : 2/13/2020 12:04:37 AM  
 Processed : 9/12/2020 11:49:31 AM  
 Printed : 9/12/2020 11:49:36 AM

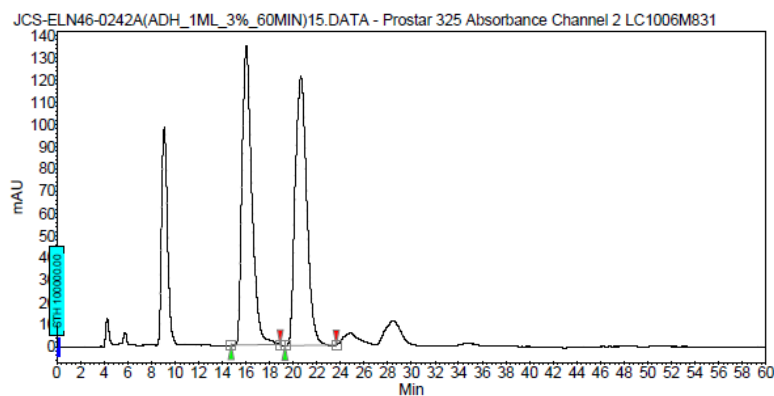

**Peak results :**

| Index | Name    | Time [Min] | Quantity [% Area] | Height [mAU] | Area [mAU.Min] | Area % [%] |
|-------|---------|------------|-------------------|--------------|----------------|------------|
| 1     | UNKNOWN | 16.04      | 48.67             | 134.3        | 129.6          | 48.668     |
| 2     | UNKNOWN | 20.66      | 51.33             | 120.9        | 136.7          | 51.332     |
| Total |         |            | 100.00            | 255.2        | 266.4          | 100.000    |

25 °C, 0.5 mol % Rh<sub>2</sub>(*R*-*p*-Ph-TPCP)<sub>4</sub>, reaction performed according to procedure 3.2

**Chromatogram :**  
**JCS-ELN46-0243(ODH\_1ML\_3%\_30MIN)18\_chann**

Prostar LC System  
 Method : ADH\_30min\_1mL\_3%-230nm  
 User : User1

Acquired : 2/13/2020 9:21:41 PM  
 Processed : 2/14/2020 12:33:29 PM  
 Printed : 9/12/2020 11:47:01 AM

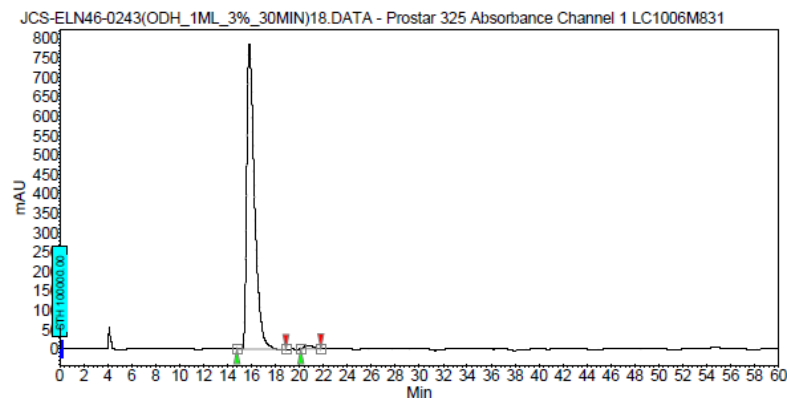

**Peak results :**

| Index | Name    | Time [Min] | Quantity [% Area] | Height [mAU] | Area [mAU.Min] | Area % [%] |
|-------|---------|------------|-------------------|--------------|----------------|------------|
| 1     | UNKNOWN | 15.83      | 98.96             | 784.2        | 595.5          | 98.955     |
| 2     | UNKNOWN | 20.74      | 1.04              | 8.3          | 8.3            | 1.045      |
| Total |         |            | 100.00            | 792.5        | 603.8          | 100.000    |

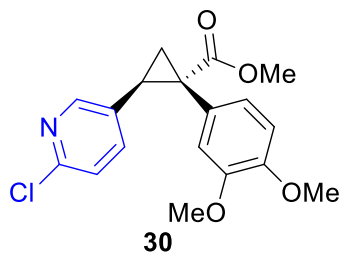

Racemic trace:

Bo-ELN-36-109RAC-ADH-60min\_1mL\_3%34.DATA - Prostar 325 Absorbance Channel 1 LC1006M831

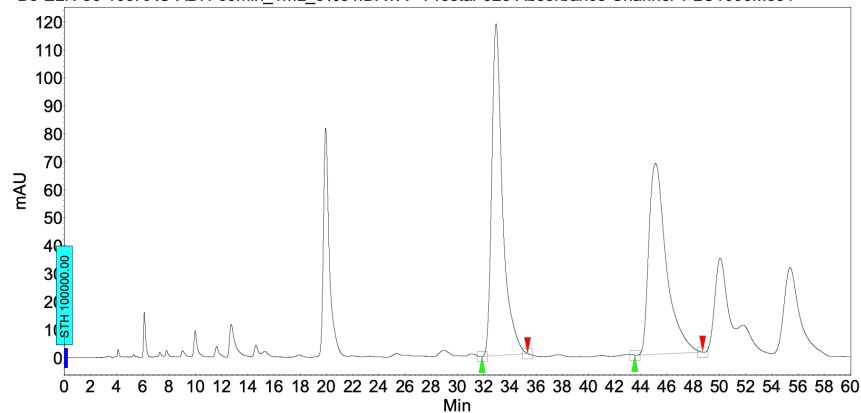

Peak results :

| Index | Name    | Time [Min] | Quantity [% Area] | Height [mAU] | Area [mAU.Min] | Area % [%] |
|-------|---------|------------|-------------------|--------------|----------------|------------|
| 1     | UNKNOWN | 32.96      | 51.67             | 118.6        | 113.3          | 51.674     |
| 2     | UNKNOWN | 45.12      | 48.33             | 68.2         | 106.0          | 48.326     |
| Total |         |            | 100.00            | 186.8        | 219.3          | 100.000    |

25 °C, 0.5 mol % Rh<sub>2</sub>(*R*-*p*-Ph-TPCP)<sub>4</sub>, reaction performed according to procedure 3.2

Chromatogram :

JCS-ELN46-0245RE(ADH\_1ML\_3%\_60MIN)3\_cha

Prostar LC System

Method : DACHDNB\_30min\_1mL\_3%-230nm

User : User1

Acquired : 2/19/2020 11:11:37 AM

Processed : 2/19/2020 12:19:49 PM

Printed : 9/12/2020 11:43:05 AM

JCS-ELN46-0245RE(ADH\_1ML\_3%\_60MIN)3.DATA - Prostar 325 Absorbance Channel 1 LC1006M831

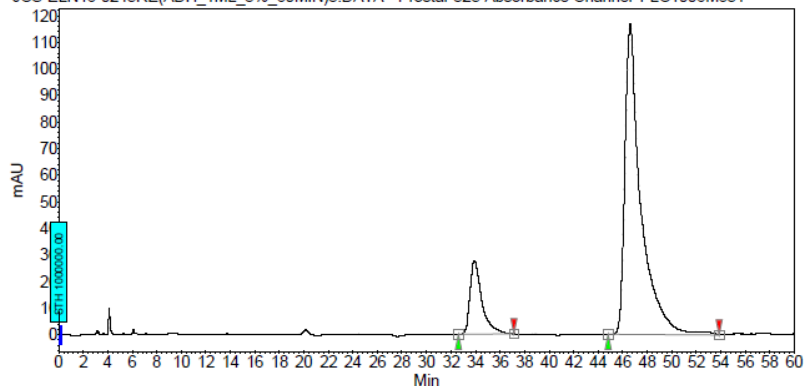

Peak results :

| Index | Name    | Time [Min] | Quantity [% Area] | Height [mAU] | Area [mAU.Min] | Area % [%] |
|-------|---------|------------|-------------------|--------------|----------------|------------|
| 1     | UNKNOWN | 33.90      | 14.93             | 27.4         | 30.8           | 14.930     |
| 2     | UNKNOWN | 46.61      | 85.07             | 116.9        | 175.5          | 85.070     |
| Total |         |            | 100.00            | 144.3        | 206.3          | 100.000    |

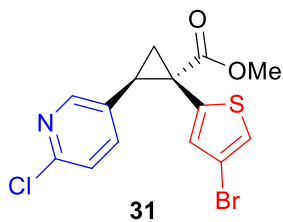

**Racemic trace:**

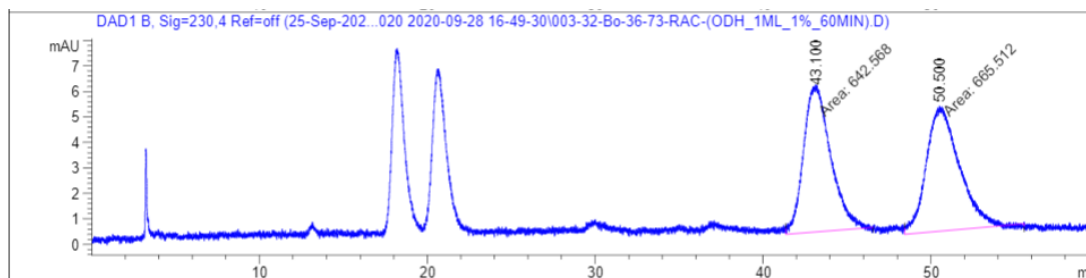

Signal 2: DAD1 B, Sig=230,4 Ref=off

| Peak # | RetTime [min] | Type | Width [min] | Area [mAU*s] | Height [mAU] | Area %  |
|--------|---------------|------|-------------|--------------|--------------|---------|
| 1      | 43.100        | MM   | 1.8564      | 642.56848    | 5.76899      | 49.1230 |
| 2      | 50.500        | MM   | 2.2602      | 665.51190    | 4.90745      | 50.8770 |

Totals : 1308.08038 10.67644

**25 °C, 0.5 mol % Rh<sub>2</sub>(*R*-*p*-Ph-TPCP)<sub>4</sub>, reaction performed according to procedure 3.2**

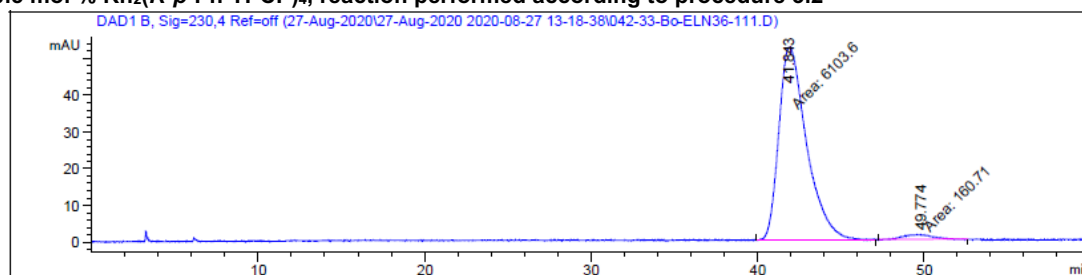

Signal 2: DAD1 B, Sig=230,4 Ref=off

| Peak # | RetTime [min] | Type | Width [min] | Area [mAU*s] | Height [mAU] | Area %  |
|--------|---------------|------|-------------|--------------|--------------|---------|
| 1      | 41.843        | MM   | 1.9352      | 6103.60498   | 52.56713     | 97.4345 |
| 2      | 49.774        | MM   | 1.9571      | 160.70956    | 1.36859      | 2.5655  |

Totals : 6264.31454 53.93572

Signal 3: DAD1 C, Sig=254,4 Ref=off

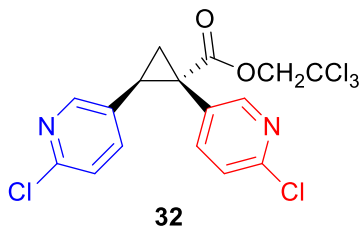

Racemic trace:

Chromatogram :  
JCS-ELN46-0234RACFINAL(ADH\_1ML\_7%\_60MIN)

36 Channel  
Prostar LC System  
Method : DACHDNB\_30min\_1mL\_7%  
User : User1

Acquired : 2/19/2020 6:16:26 PM  
Processed : 9/12/2020 11:43:33 AM  
Printed : 9/12/2020 11:43:42 AM

JCS-ELN46-0234RACFINAL(ADH\_1ML\_7%\_60MIN)6.DAT - Prostar 325 Absorbance Channel 1 LC1006M831

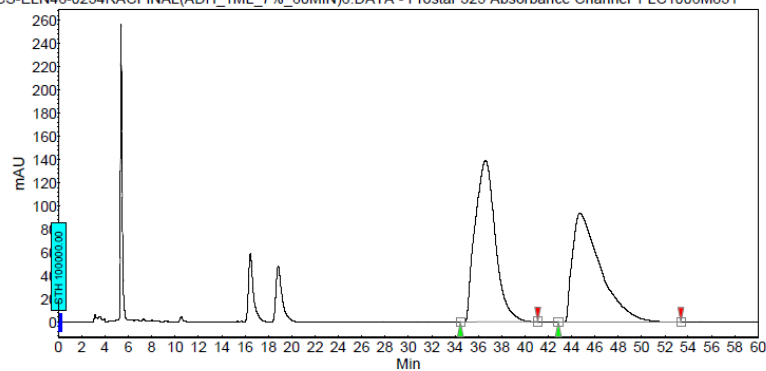

Peak results :

| Index | Name    | Time [Min] | Quantity [% Area] | Height [mAU] | Area [mAU.Min] | Area % [%] |
|-------|---------|------------|-------------------|--------------|----------------|------------|
| 1     | UNKNOWN | 36.61      | 51.67             | 138.8        | 278.8          | 51.672     |
| 2     | UNKNOWN | 44.71      | 48.33             | 93.6         | 260.8          | 48.328     |
| Total |         |            | 100.00            | 232.4        | 539.6          | 100.000    |

25 °C, 0.5 mol % Rh<sub>2</sub>(*R*-*p*-Ph-TPCP)<sub>4</sub>, reaction performed according to procedure 3.2

Chromatogram :  
JCS-ELN46-0234RE(ADH\_1ML\_7%\_60MIN)3\_cha

36 Channel  
Prostar LC System  
Method : DACHDNB\_30min\_1mL\_7%  
User : User1

Acquired : 2/20/2020 9:32:24 AM  
Processed : 2/20/2020 11:01:57 AM  
Printed : 9/12/2020 12:08:20 PM

JCS-ELN46-0234RE(ADH\_1ML\_7%\_60MIN)3.DAT - Prostar 325 Absorbance Channel 1 LC1006M831

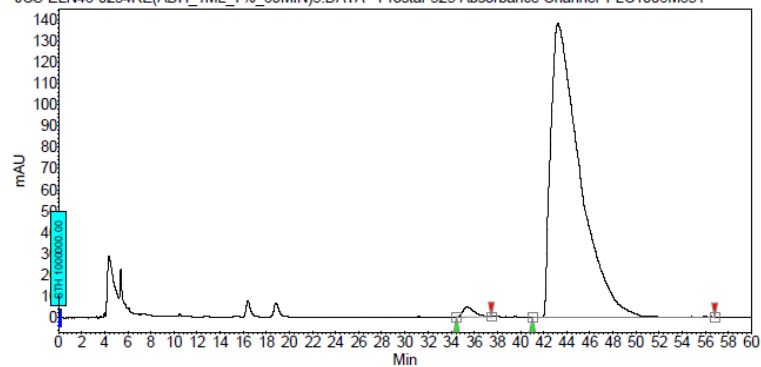

Peak results :

| Index | Name    | Time [Min] | Quantity [% Area] | Height [mAU] | Area [mAU.Min] | Area % [%] |
|-------|---------|------------|-------------------|--------------|----------------|------------|
| 1     | UNKNOWN | 35.37      | 1.42              | 4.8          | 5.8            | 1.415      |
| 2     | UNKNOWN | 43.25      | 98.58             | 138.1        | 402.4          | 98.585     |
| Total |         |            | 100.00            | 142.9        | 408.1          | 100.000    |

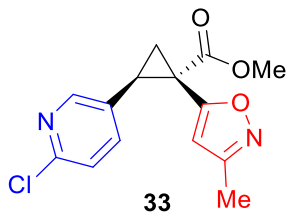

**Racemic trace:**

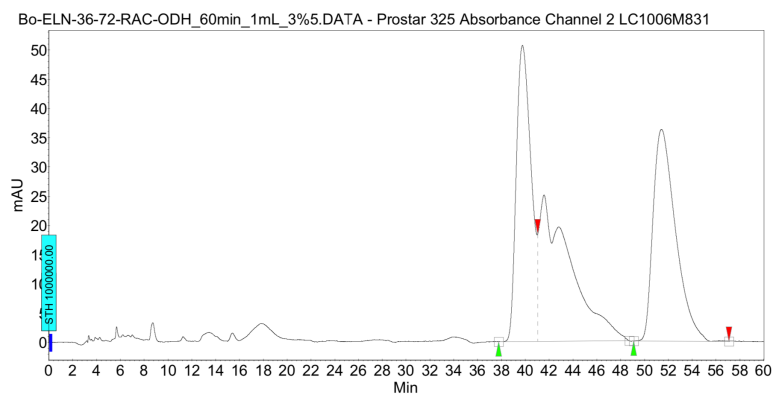

**Peak results :**

| Index | Name    | Time [Min] | Quantity [% Area] | Height [mAU] | Area [mAU.Min] | Area % [%] |
|-------|---------|------------|-------------------|--------------|----------------|------------|
| 2     | UNKNOWN | 39.76      | 47.92             | 50.7         | 73.0           | 47.918     |
| 1     | UNKNOWN | 51.41      | 52.08             | 36.2         | 79.4           | 52.082     |
| Total |         |            | 100.00            | 86.9         | 152.4          | 100.000    |

**25 °C, 0.5 mol % Rh<sub>2</sub>(*R*-*p*-Ph-TPCP)<sub>4</sub>, reaction performed according to procedure 3.2**

**Chromatogram :**  
**JCS-ELN46-0235RE(ODH\_1ML\_3%\_60MIN)30\_ch**

analis  
 Method : ADH\_30min\_1mL\_3%-230nm  
 User : User1

Acquired : 2/14/2020 4:35:50 AM  
 Processed : 2/14/2020 12:36:05 PM  
 Printed : 9/12/2020 11:46:24 AM

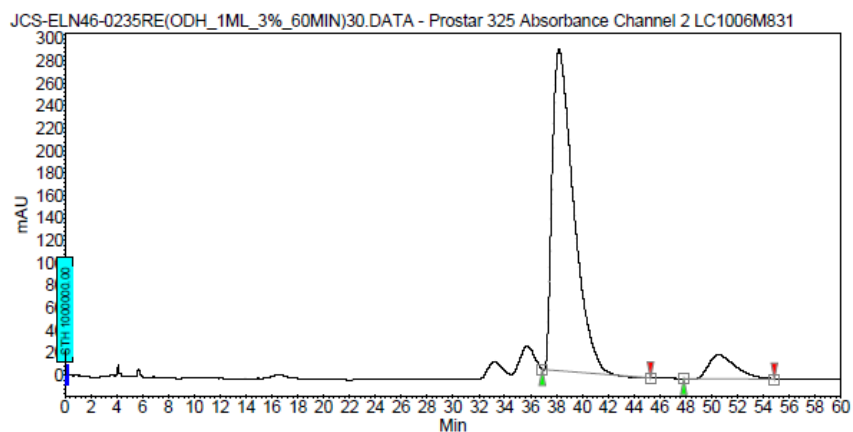

**Peak results :**

| Index | Name    | Time [Min] | Quantity [% Area] | Height [mAU] | Area [mAU.Min] | Area % [%] |
|-------|---------|------------|-------------------|--------------|----------------|------------|
| 1     | UNKNOWN | 38.21      | 91.41             | 285.8        | 547.1          | 91.409     |
| 2     | UNKNOWN | 50.56      | 8.59              | 21.1         | 51.4           | 8.591      |
| Total |         |            | 100.00            | 306.9        | 598.6          | 100.000    |

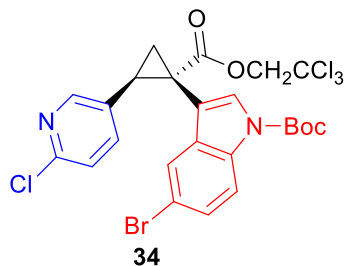

Racemic trace:

Chromatogram :  
JCS-ELN46-0238A(ADH\_1ML\_3%-60MIN)3\_chan

Method : Prostar LC System

Method : ADH\_30min\_1mL\_3%-230nm  
User : User1

Acquired : 2/12/2020 4:50:11 PM

Processed : 9/12/2020 11:51:40 AM  
Printed : 9/12/2020 11:51:45 AM

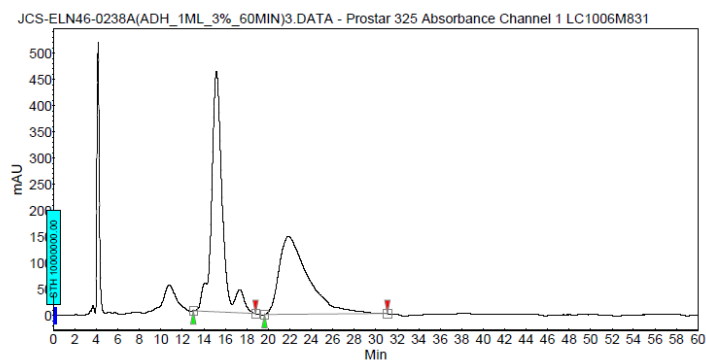

Peak results :

| Index | Name    | Time [Min] | Quantity [% Area] | Height [mAU] | Area [mAU.Min] | Area % [%] |
|-------|---------|------------|-------------------|--------------|----------------|------------|
| 1     | UNKNOWN | 15.17      | 53.91             | 457.7        | 547.2          | 53.912     |
| 2     | UNKNOWN | 21.87      | 46.09             | 147.8        | 467.8          | 46.088     |
| Total |         |            | 100.00            | 605.5        | 1015.0         | 100.000    |

25 °C, 0.5 mol % Rh<sub>2</sub>(*R*-*p*-Ph-TPCP)<sub>4</sub>, reaction performed according to procedure 3.2

Chromatogram :  
JCS-ELN46-0239(ODH\_1ML\_3%-30MIN)9\_chan

Method : Prostar LC System

Method : ADH\_30min\_1mL\_3%-230nm  
User : User1

Acquired : 2/13/2020 4:27:23 PM

Processed : 2/13/2020 5:37:57 PM  
Printed : 9/12/2020 11:47:49 AM

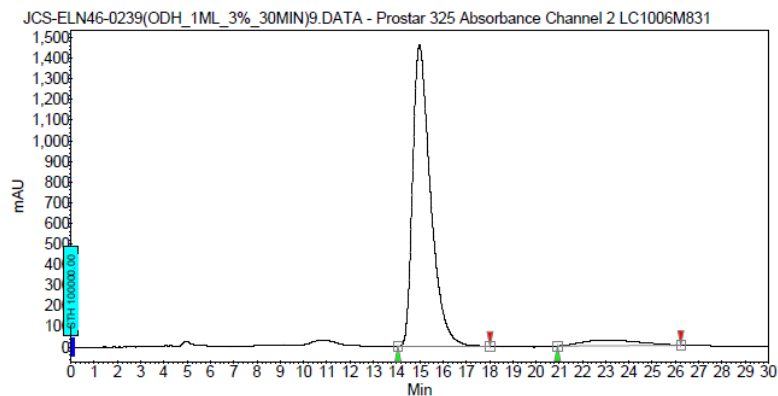

Peak results :

| Index | Name    | Time [Min] | Quantity [% Area] | Height [mAU] | Area [mAU.Min] | Area % [%] |
|-------|---------|------------|-------------------|--------------|----------------|------------|
| 1     | UNKNOWN | 14.89      | 94.21             | 1480.7       | 1300.2         | 94.213     |
| 2     | UNKNOWN | 23.00      | 5.79              | 27.2         | 79.9           | 5.787      |
| Total |         |            | 100.00            | 1487.9       | 1380.0         | 100.000    |

Racemic trace:

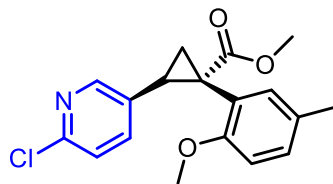

36

Bo-ELN-0036-0017-RAC-ADH\_30min\_1mL\_1%-230nm2.DAT - Prostar 325 Absorbance Channel 2 LC1006M831

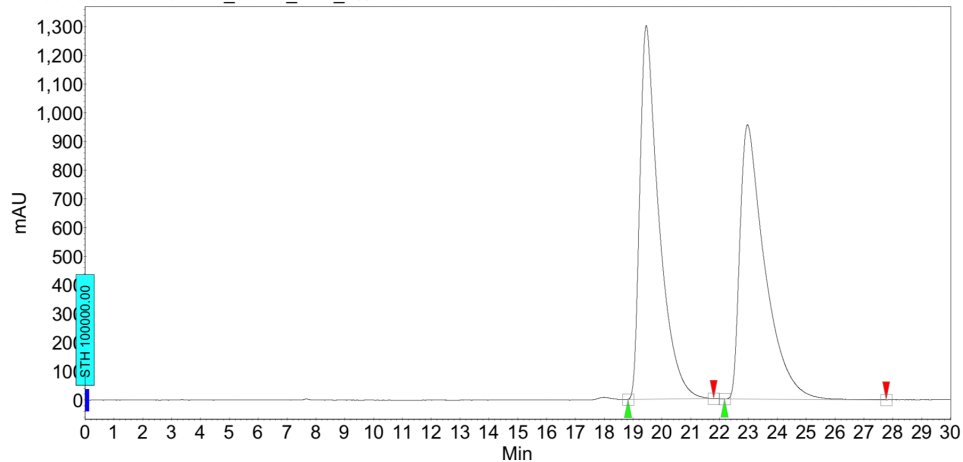

Peak results :

| Index | Name    | Time [Min] | Quantity [% Area] | Height [mAU] | Area [mAU.Min] | Area % [%] |
|-------|---------|------------|-------------------|--------------|----------------|------------|
| 2     | UNKNOWN | 19.46      | 51.18             | 1301.1       | 997.7          | 51.179     |
| 1     | UNKNOWN | 22.97      | 48.82             | 954.5        | 951.7          | 48.821     |
| Total |         |            | 100.00            | 2255.5       | 1949.4         | 100.000    |

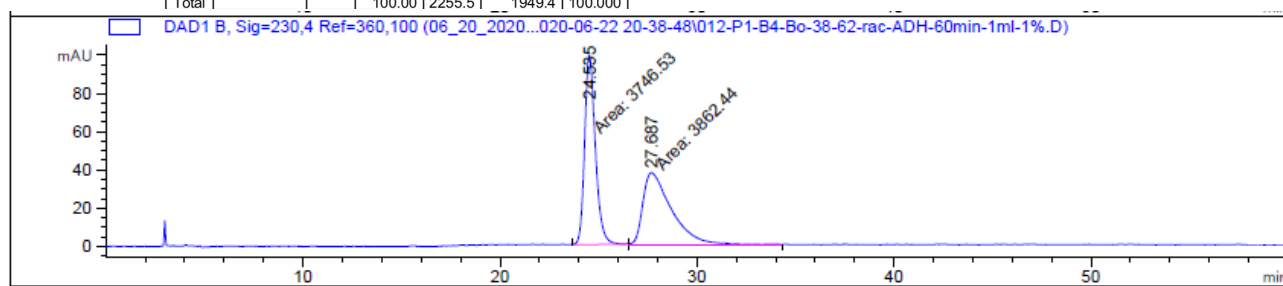

Signal 2: DAD1 B, Sig=230,4 Ref=360,100

| Peak # | RetTime [min] | Type | Width [min] | Area [mAU*s] | Height [mAU] | Area %  |
|--------|---------------|------|-------------|--------------|--------------|---------|
| 1      | 24.535        | MM   | 0.6308      | 3746.52588   | 98.99397     | 49.2383 |
| 2      | 27.687        | MM   | 1.7056      | 3862.44385   | 37.74244     | 50.7617 |

Totals : 7608.96973 136.73640

25 °C, 1 mol % Rh<sub>2</sub>(S-Tris(*p*-<sup>t</sup>BuPh)-TPCP)<sub>4</sub>, 2.5 equiv of vinyl pyridine, reaction performed according to procedure 3.3

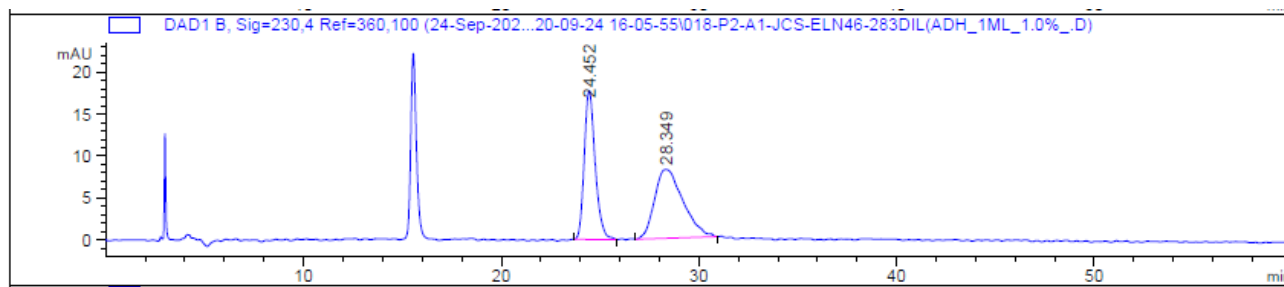

Signal 2: DAD1 B, Sig=230,4 Ref=360,100

| Peak # | RetTime [min] | Type | Width [min] | Area [mAU*s] | Height [mAU] | Area %  |
|--------|---------------|------|-------------|--------------|--------------|---------|
| 1      | 24.452        | BB   | 0.5913      | 682.12305    | 17.71050     | 45.3337 |
| 2      | 28.349        | BB   | 1.1946      | 822.54871    | 8.19809      | 54.6663 |

Totals : 1504.67175 25.90858

25 °C, 1 mol % Rh<sub>2</sub>(R-*p*-Ph-TPCP)<sub>4</sub>, 2.5 equiv of vinyl pyridine, reaction performed according to procedure 3.3

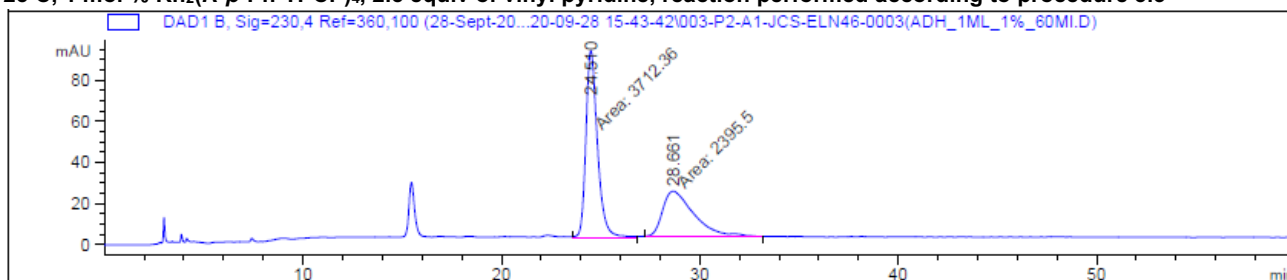

Signal 2: DAD1 B, Sig=230,4 Ref=360,100

| Peak # | RetTime [min] | Type | Width [min] | Area [mAU*s] | Height [mAU] | Area %  |
|--------|---------------|------|-------------|--------------|--------------|---------|
| 1      | 24.510        | MM   | 0.6798      | 3712.36304   | 91.01790     | 60.7801 |
| 2      | 28.661        | MM   | 1.8180      | 2395.49829   | 21.96103     | 39.2199 |

Totals : 6107.86133 112.97893

25 °C, 1 mol % Rh<sub>2</sub>(S-PTAD)<sub>4</sub>, 2.5 equiv of vinyl pyridine, reaction performed according to procedure 3.3

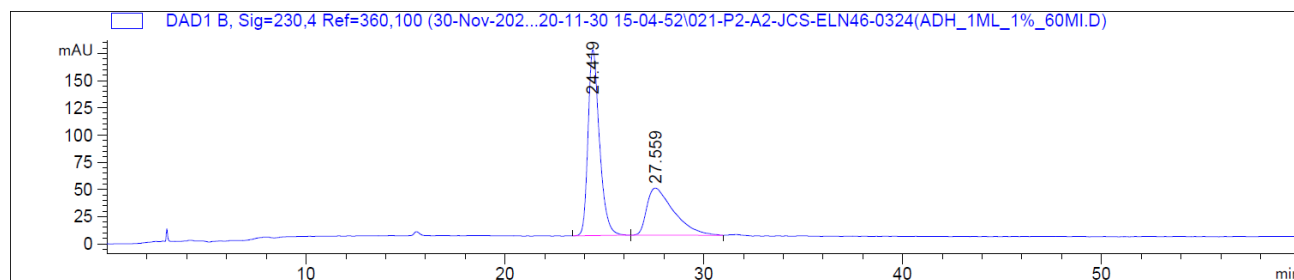

Signal 2: DAD1 B, Sig=230,4 Ref=360,100

| Peak # | RetTime [min] | Type | Width [min] | Area [mAU*s] | Height [mAU] | Area %  |
|--------|---------------|------|-------------|--------------|--------------|---------|
| 1      | 24.419        | BB   | 0.6104      | 6852.22852   | 170.68393    | 62.7498 |
| 2      | 27.559        | BB   | 1.3235      | 4067.68384   | 43.24023     | 37.2502 |

Totals : 1.09199e4 213.92416

**25 °C, 1 mol % Rh<sub>2</sub>(R-DOSP)<sub>4</sub>, 2.5 equiv of vinyl pyridine, reaction performed according to procedure 3.3**

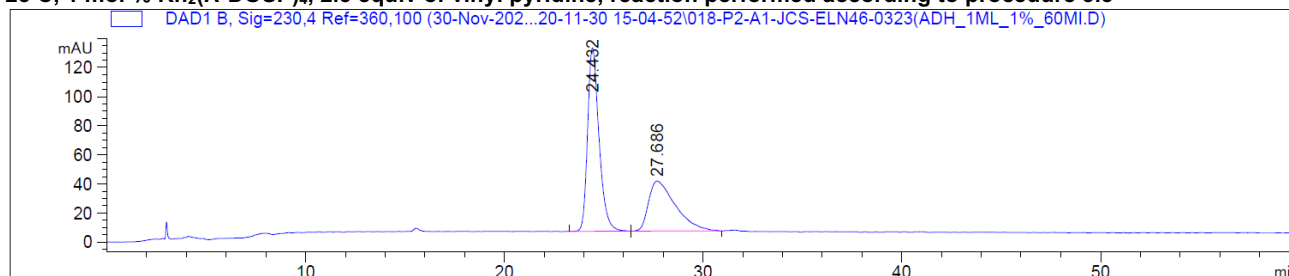

Signal 2: DAD1 B, Sig=230,4 Ref=360,100

| Peak # | RetTime [min] | Type | Width [min] | Area [mAU*s] | Height [mAU] | Area %  |
|--------|---------------|------|-------------|--------------|--------------|---------|
| 1      | 24.432        | BB   | 0.6066      | 5040.94482   | 126.03858    | 60.9987 |
| 2      | 27.686        | BB   | 1.2961      | 3223.07275   | 34.36885     | 39.0013 |

Totals : 8264.01758 160.40743

**25 °C, 1 mol % Rh<sub>2</sub>(S-TPPTTL)<sub>4</sub>, 2.5 equiv of vinyl pyridine, reaction performed according to procedure 5.3**

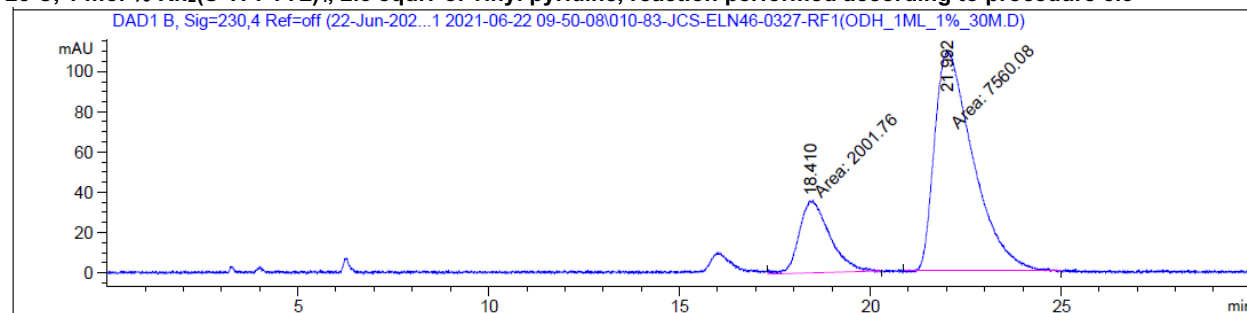

Signal 2: DAD1 B, Sig=230,4 Ref=off

| Peak # | RetTime [min] | Type | Width [min] | Area [mAU*s] | Height [mAU] | Area %  |
|--------|---------------|------|-------------|--------------|--------------|---------|
| 1      | 18.410        | MM   | 0.9206      | 2001.76111   | 36.24048     | 20.9349 |
| 2      | 21.992        | MM   | 1.1563      | 7560.07959   | 108.97326    | 79.0651 |

Totals : 9561.84070 145.21374

**25 °C, 1 mol % Rh<sub>2</sub>(S-TPPTTL)<sub>4</sub>, 2.5 equiv of vinyl pyridine, trifluorotoluene as solvent, reaction performed according to procedure 3.3**

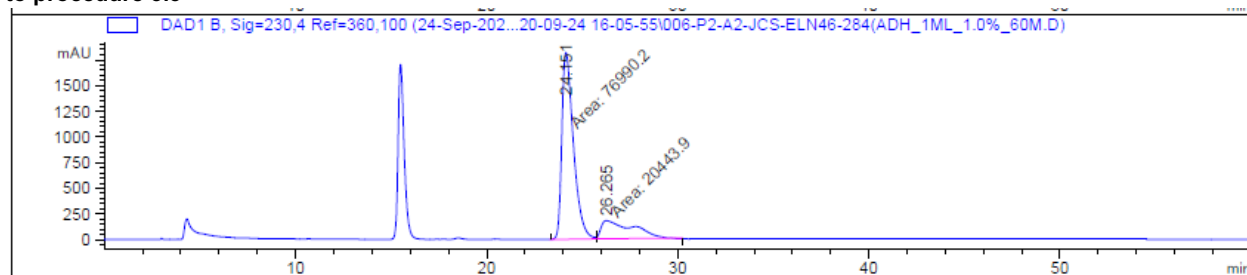

Signal 2: DAD1 B, Sig=230,4 Ref=360,100

| Peak # | RetTime [min] | Type | Width [min] | Area [mAU*s] | Height [mAU] | Area %  |
|--------|---------------|------|-------------|--------------|--------------|---------|
| 1      | 24.151        | MM   | 0.7051      | 7.69902e4    | 1819.95508   | 79.0177 |
| 2      | 26.265        | MM   | 1.9219      | 2.04439e4    | 177.29097    | 20.9823 |

Totals : 9.74341e4 1997.24605

25 °C, 1.0 mol % Rh<sub>2</sub>(S-TPPTTL)<sub>4</sub>, 2.5 equiv vinyl heterocycle, (MeO)<sub>2</sub>CO as solvent, reaction performed according to procedure 3.3

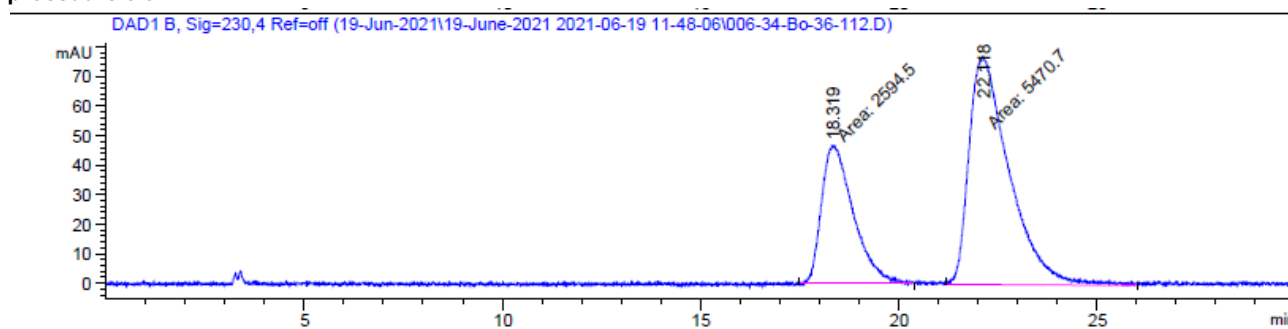

Signal 2: DAD1 B, Sig=230,4 Ref=off

| Peak # | RetTime [min] | Type | Width [min] | Area [mAU*s] | Height [mAU] | Area %  |
|--------|---------------|------|-------------|--------------|--------------|---------|
| 1      | 18.319        | MM   | 0.9232      | 2594.49976   | 46.84001     | 32.1691 |
| 2      | 22.118        | MM   | 1.1747      | 5470.69922   | 77.62168     | 67.8309 |

Totals : 8065.19897 124.46169

0 °C, 1.0 mol % Rh<sub>2</sub>(S-TPPTTL)<sub>4</sub>, 2.5 equiv vinyl heterocycle, CH<sub>2</sub>Cl<sub>2</sub> as solvent, reaction performed according to procedure 3.3

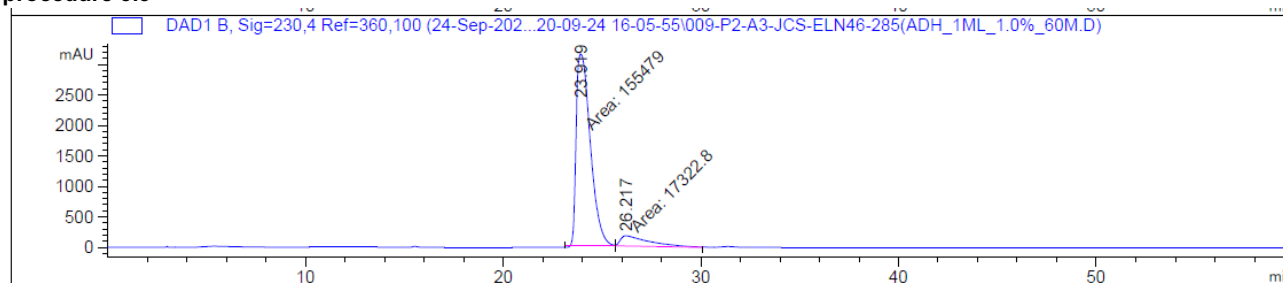

Signal 2: DAD1 B, Sig=230,4 Ref=360,100

| Peak # | RetTime [min] | Type | Width [min] | Area [mAU*s] | Height [mAU] | Area %  |
|--------|---------------|------|-------------|--------------|--------------|---------|
| 1      | 23.919        | MM   | 0.8237      | 1.55479e5    | 3145.96094   | 89.9753 |
| 2      | 26.217        | MM   | 1.7319      | 1.73228e4    | 166.70610    | 10.0247 |

Totals : 1.72802e5 3312.66704

–50 °C, 1.0 mol % Rh<sub>2</sub>(*R*-TPPTTL)<sub>4</sub>, 2.5 equiv vinyl heterocycle, CH<sub>2</sub>Cl<sub>2</sub> as solvent, reaction performed according to procedure 3.3

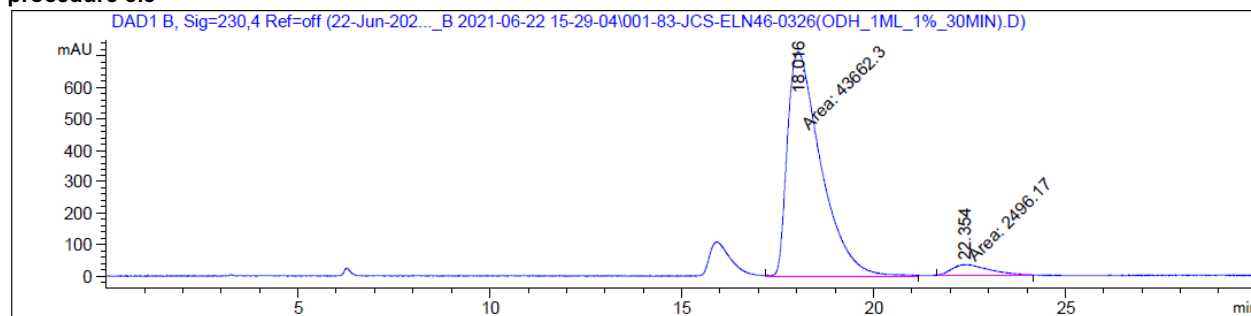

Signal 2: DAD1 B, Sig=230,4 Ref=off

| Peak # | RetTime [min] | Type | Width [min] | Area [mAU*s] | Height [mAU] | Area %  |
|--------|---------------|------|-------------|--------------|--------------|---------|
| 1      | 18.016        | MM   | 1.0163      | 4.36623e4    | 716.00336    | 94.5922 |
| 2      | 22.354        | MM   | 1.1754      | 2496.16895   | 35.39403     | 5.4078  |

Totals : 4.61585e4 751.39739

0 °C, 1.0 mol % Rh<sub>2</sub>(*S*-TPPTTL)<sub>4</sub>, 5.0 equiv vinyl heterocycle, CH<sub>2</sub>Cl<sub>2</sub> as solvent, reaction performed according to procedure 3.3

Chromatogram :

JCS-ELN46-0088(OD-H\_30min\_1ml\_1%)23\_chann

Method : Prostar LC System  
Method : ADH\_30min\_1ml\_1%-230nm  
User : User1

Acquired : 10/10/2019 4:30:32 PM  
Processed : 10/10/2019 5:01:43 PM  
Printed : 9/30/2020 3:25:52 PM

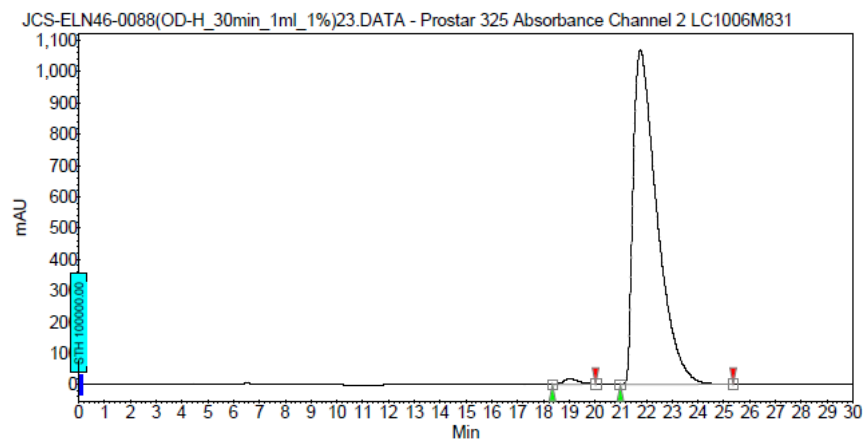

Peak results :

| Index | Name    | Time [Min] | Quantity [% Area] | Height [mAU] | Area [mAU.Min] | Area % [%] |
|-------|---------|------------|-------------------|--------------|----------------|------------|
| 1     | UNKNOWN | 19.04      | 1.08              | 17.1         | 12.5           | 1.084      |
| 2     | UNKNOWN | 21.76      | 98.92             | 1068.8       | 1142.0         | 98.916     |
| Total |         |            | 100.00            | 1085.9       | 1154.6         | 100.000    |

0 °C, 1.0 mol % Rh<sub>2</sub>(S-TPPTTL)<sub>4</sub>, 10.0 equiv vinyl heterocycle, CH<sub>2</sub>Cl<sub>2</sub> as solvent, reaction performed according to procedure 3.3

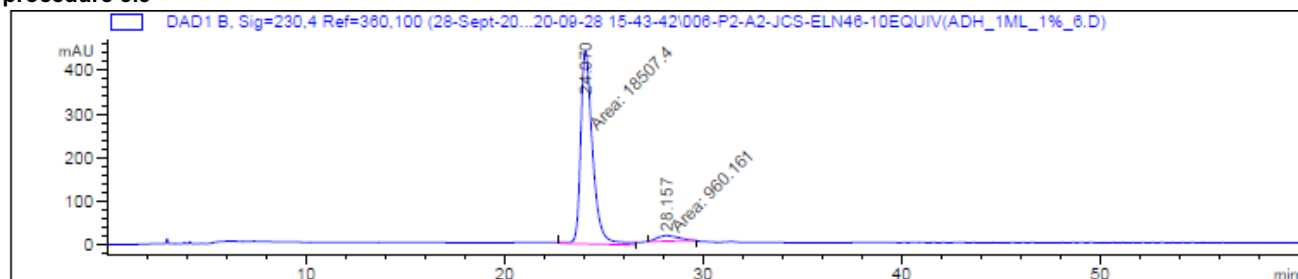

| Peak #   | RetTime [min] | Type | Width [min] | Area [mAU*s] | Height [mAU] | Area %  |
|----------|---------------|------|-------------|--------------|--------------|---------|
| 1        | 24.070        | MM   | 0.6933      | 1.85074e4    | 444.89807    | 95.0679 |
| 2        | 28.157        | MM   | 1.2559      | 960.16119    | 12.74203     | 4.9321  |
| Totals : |               |      |             | 1.94676e4    | 457.64010    |         |

0 °C, 1.0 mol % Rh<sub>2</sub>(S-TPPTTL)<sub>4</sub>, 1.5 equiv vinyl heterocycle, 3.5 equiv 2-chloropyridine, CH<sub>2</sub>Cl<sub>2</sub> as solvent, reaction performed according to procedure 3.4

#### Chromatogram :

JCS-ELN46-0085(OD-H\_30min\_1ml\_1%)20\_chann

Method : Prostar LC System  
Method : ADH\_30min\_1ml\_1%-230nm  
User : User1

Acquired : 10/10/2019 3:13:03 PM  
Processed : 10/10/2019 3:52:13 PM  
Printed : 9/30/2020 3:25:44 PM

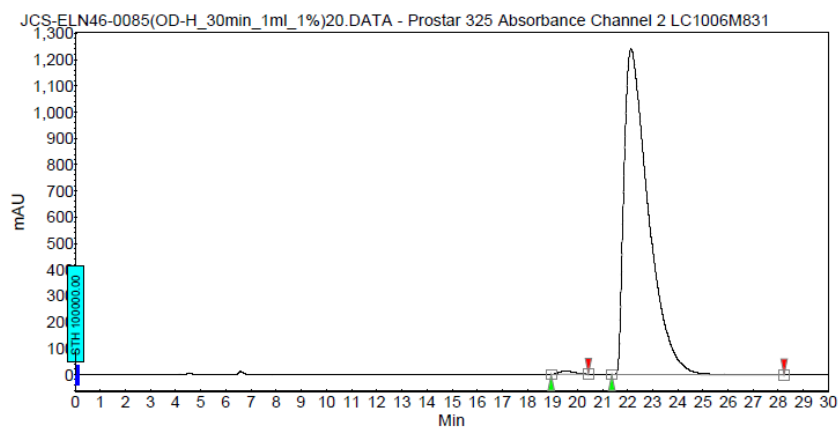

#### Peak results :

| Index | Name    | Time [Min] | Quantity [% Area] | Height [mAU] | Area [mAU.Min] | Area % [%] |
|-------|---------|------------|-------------------|--------------|----------------|------------|
| 1     | UNKNOWN | 19.54      | 0.67              | 13.0         | 9.4            | 0.670      |
| 2     | UNKNOWN | 22.14      | 99.33             | 1239.6       | 1387.0         | 99.330     |
| Total |         |            | 100.00            | 1252.6       | 1396.4         | 100.000    |

0 °C, 1.0 mol % Rh<sub>2</sub>(S-TPPTTL)<sub>4</sub>, 1.5 equiv vinyl heterocycle, 2.5 equiv 2-chloropyridine, CH<sub>2</sub>Cl<sub>2</sub> as solvent, reaction performed according to procedure 3.4

**Chromatogram :**  
**JCS-ELN46-2.5P(ODH\_30MIN\_1ML\_1%)9\_channe**

Item : Prostar LC System  
 Method : ADH\_30min\_1mL\_1%-230nm  
 User : User1  
 Acquired : 12/10/2019 4:34:30 PM  
 Processed : 12/11/2019 11:15:42 AM  
 Printed : 12/31/2019 12:04:53 PM

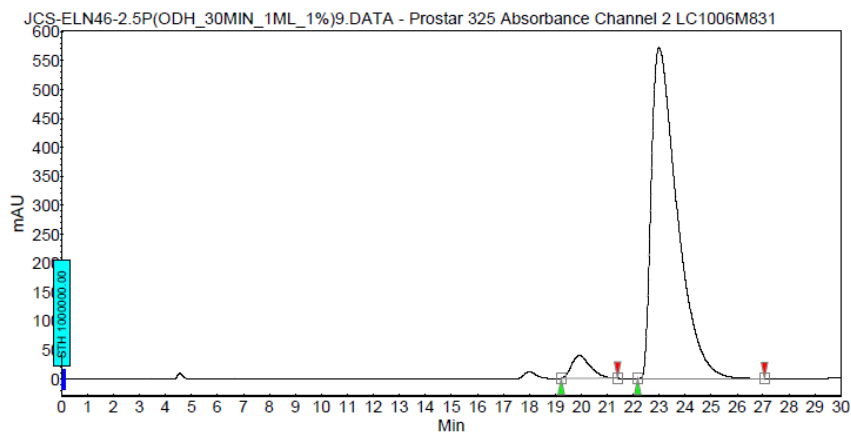

**Peak results :**

| Index | Name    | Time [Min] | Quantity [% Area] | Height [mAU] | Area [mAU.Min] | Area % [%] |
|-------|---------|------------|-------------------|--------------|----------------|------------|
| 1     | UNKNOWN | 19.92      | 4.75              | 39.3         | 32.8           | 4.753      |
| 2     | UNKNOWN | 23.00      | 95.25             | 571.8        | 657.6          | 95.247     |
| Total |         |            | 100.00            | 611.1        | 690.4          | 100.000    |

0 °C, 1.0 mol % Rh<sub>2</sub>(S-TPPTTL)<sub>4</sub>, 1.5 equiv vinyl heterocycle, 1.5 equiv 2-chloropyridine, CH<sub>2</sub>Cl<sub>2</sub> as solvent, reaction performed according to procedure 3.4

**Chromatogram :**  
**JCS-ELN46-1.5P(ODH\_30MIN\_1ML\_1%)6\_channe**

Item : Prostar LC System  
 Method : ADH\_30min\_1mL\_1%-230nm  
 User : User1  
 Acquired : 12/10/2019 3:17:21 PM  
 Processed : 12/11/2019 11:15:02 AM  
 Printed : 12/31/2019 12:04:31 PM

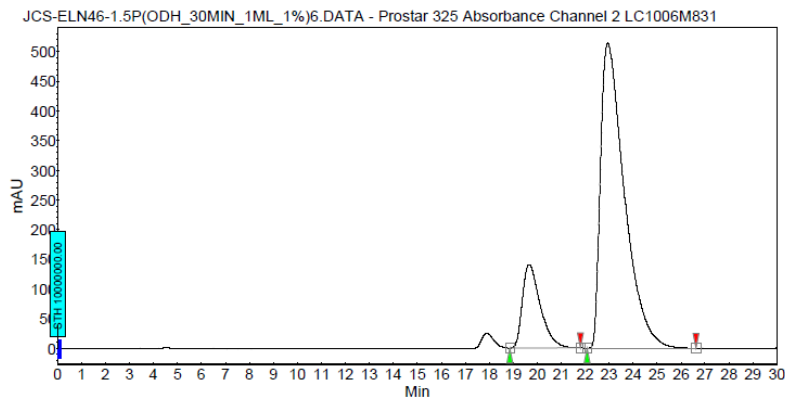

**Peak results :**

| Index | Name    | Time [Min] | Quantity [% Area] | Height [mAU] | Area [mAU.Min] | Area % [%] |
|-------|---------|------------|-------------------|--------------|----------------|------------|
| 1     | UNKNOWN | 19.86      | 17.07             | 140.3        | 121.7          | 17.068     |
| 2     | UNKNOWN | 22.94      | 82.93             | 513.6        | 591.4          | 82.932     |
| Total |         |            | 100.00            | 653.9        | 713.1          | 100.000    |

0 °C, 1.0 mol % Rh<sub>2</sub>(S-TPPTTL)<sub>4</sub>, 1.5 equiv vinyl heterocycle, 3.5 equiv 2-chloropyridine, CH<sub>2</sub>Cl<sub>2</sub> as solvent, no drying additive present, reaction performed according to procedure 3.4

#### Chromatogram :

JCS-ELN46-0046re(ADH\_1ml\_1%\_60min)2\_chann

Method : Prostar LC System  
Method : DACHDNB\_30min\_1mL\_1%-230nm  
User : User1  
Acquired : 8/28/2019 5:38:18 PM  
Processed : 8/29/2019 11:36:36 AM  
Printed : 9/30/2020 3:29:25 PM

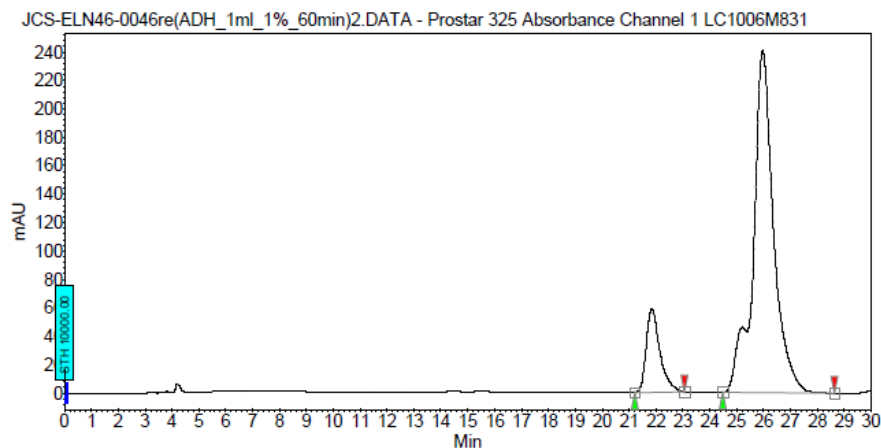

#### Peak results :

| Index | Name    | Time [Min] | Quantity [% Area] | Height [mAU] | Area [mAU.Min] | Area % [%] |
|-------|---------|------------|-------------------|--------------|----------------|------------|
| 1     | UNKNOWN | 21.84      | 14.11             | 59.4         | 34.9           | 14.110     |
| 2     | UNKNOWN | 25.97      | 85.89             | 241.1        | 212.6          | 85.890     |
| Total |         |            | 100.00            | 300.5        | 247.5          | 100.000    |

0 °C, 1.0 mol % Rh<sub>2</sub>(S-TPPTTL)<sub>4</sub>, 1.5 equiv vinyl heterocycle, 3.5 equiv 2-chloropyridine, CH<sub>2</sub>Cl<sub>2</sub> as solvent, 10 equiv HFIP, reaction performed according to procedure 3.5

#### Chromatogram :

JCS-ELN46-0185(ODH\_1ML\_1%\_30MIN)67\_chann

Method : Prostar LC System  
Method : ADH\_30min\_1mL\_1%-230nm  
User : User1  
Acquired : 12/11/2019 10:42:37 PM  
Processed : 12/12/2019 9:45:36 AM  
Printed : 9/12/2020 12:15:49 PM

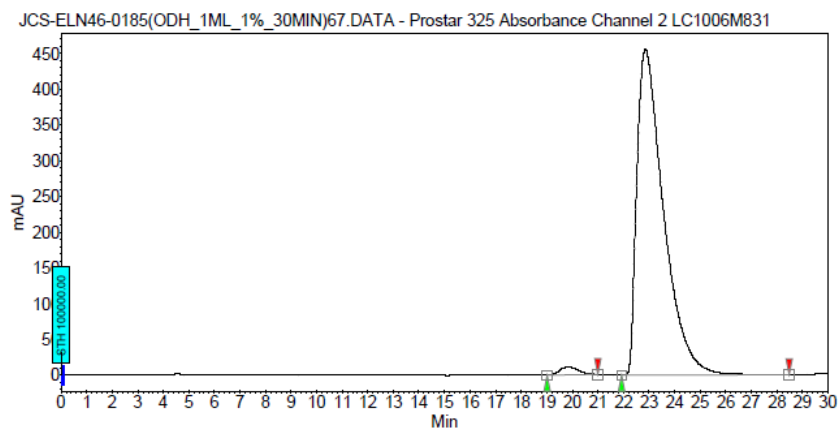

#### Peak results :

| Index | Name    | Time [Min] | Quantity [% Area] | Height [mAU] | Area [mAU.Min] | Area % [%] |
|-------|---------|------------|-------------------|--------------|----------------|------------|
| 1     | UNKNOWN | 19.82      | 1.71              | 11.3         | 9.6            | 1.714      |
| 2     | UNKNOWN | 22.86      | 98.29             | 455.9        | 550.6          | 98.286     |
| Total |         |            | 100.00            | 467.2        | 560.2          | 100.000    |

0 °C, 1.0 mol % Rh<sub>2</sub>(S-TPPTTL)<sub>4</sub>, 1.5 equiv vinyl heterocycle, 3.5 equiv 2-chloropyridine, CH<sub>2</sub>Cl<sub>2</sub> as solvent, 5 equiv HFIP, reaction performed according to procedure 3.5

**Chromatogram :**

**JCS-ELN46-0144(ODSH\_1ml\_1%-30min)3\_chann**

Method: Prostar LC System  
Method: ADH\_30min\_1mL\_1%-230nm  
User: User1

Acquired : 11/21/2019 11:16:20 AM  
Processed : 11/21/2019 11:57:48 AM  
Printed : 12/31/2019 12:18:07 PM

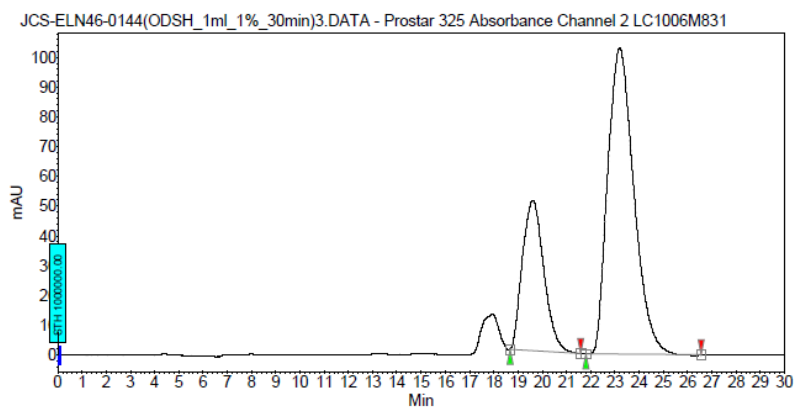

**Peak results :**

| Index | Name    | Time [Min] | Quantity [% Area] | Height [mAU] | Area [mAU.Min] | Area % [%] |
|-------|---------|------------|-------------------|--------------|----------------|------------|
| 1     | UNKNOWN | 19.81      | 28.83             | 50.4         | 51.9           | 28.830     |
| 2     | UNKNOWN | 23.20      | 71.17             | 102.7        | 128.0          | 71.170     |
| Total |         |            | 100.00            | 153.1        | 179.9          | 100.000    |

0 °C, 1.0 mol % Rh<sub>2</sub>(S-TPPTTL)<sub>4</sub>, 1.5 equiv vinyl heterocycle, 3.5 equiv 2-chloropyridine, CH<sub>2</sub>Cl<sub>2</sub> as solvent, 1.0 equiv HFIP, reaction performed according to procedure 3.5

**Chromatogram :**

**JCS-ELN46-0146(ODSH\_1ml\_1%-30min)9\_chann**

Method: Prostar LC System  
Method: ADH\_30min\_1mL\_1%-230nm  
User: User1

Acquired : 11/21/2019 1:54:03 PM  
Processed : 11/25/2019 3:27:35 PM  
Printed : 12/31/2019 12:18:17 PM

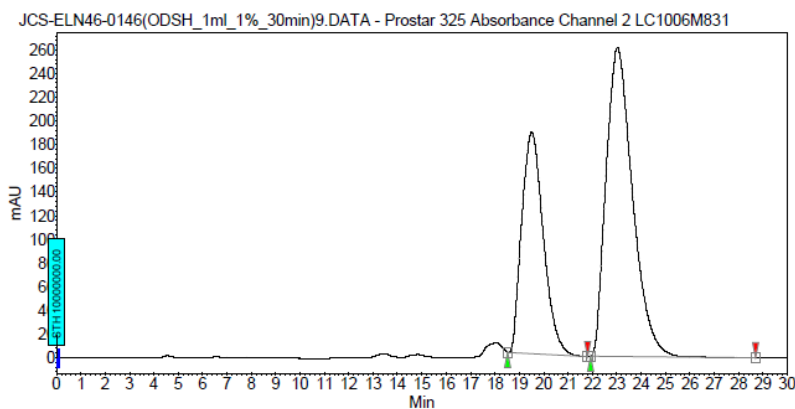

**Peak results :**

| Index | Name    | Time [Min] | Quantity [% Area] | Height [mAU] | Area [mAU.Min] | Area % [%] |
|-------|---------|------------|-------------------|--------------|----------------|------------|
| 1     | UNKNOWN | 19.51      | 37.00             | 187.6        | 192.8          | 36.999     |
| 2     | UNKNOWN | 23.03      | 63.00             | 260.8        | 326.3          | 63.001     |
| Total |         |            | 100.00            | 448.4        | 521.1          | 100.000    |

25 °C, 1.0 mol % Rh<sub>2</sub>(S-TPPTL)<sub>4</sub>, 1.5 equiv vinyl heterocycle, 3.5 equiv 2-chloropyridine, CH<sub>2</sub>Cl<sub>2</sub> as solvent 20 equiv HFIP, reaction performed according to procedure 3.6

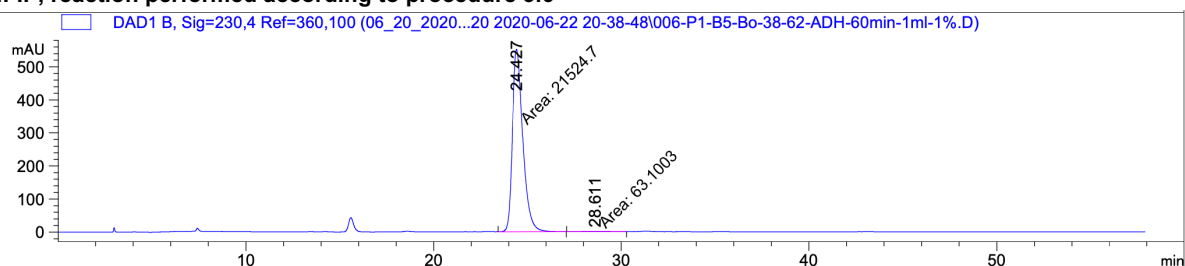

Signal 2: DAD1 B, Sig=230,4 Ref=360,100

| Peak # | RetTime [min] | Type | Width [min] | Area [mAU*s] | Height [mAU] | Area %  |
|--------|---------------|------|-------------|--------------|--------------|---------|
| 1      | 24.427        | MM   | 0.6497      | 2.15247e4    | 552.13348    | 99.7077 |
| 2      | 28.611        | MM   | 1.2945      | 63.10027     | 8.12402e-1   | 0.2923  |

Totals : 2.15878e4 552.94589

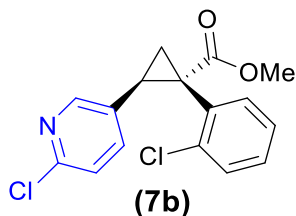

Racemic Trace:

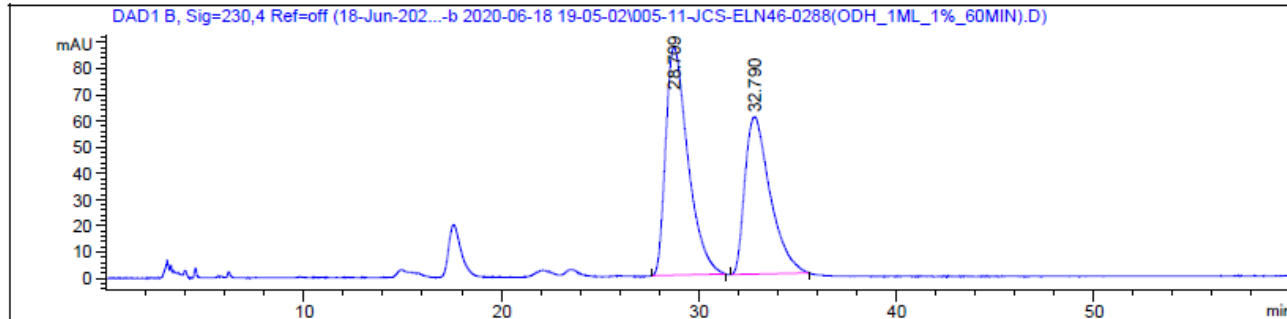

Signal 2: DAD1 B, Sig=230,4 Ref=off

| Peak # | RetTime [min] | Type | Width [min] | Area [mAU*s] | Height [mAU] | Area %  |
|--------|---------------|------|-------------|--------------|--------------|---------|
| 1      | 28.709        | VV R | 0.9181      | 6819.27051   | 86.98462     | 56.0344 |
| 2      | 32.790        | VV R | 1.0426      | 5350.51172   | 60.01482     | 43.9656 |

Totals : 1.21698e4 146.99944

0 °C, 1.0 mol % Rh<sub>2</sub>(S-TPPTTL)<sub>4</sub>, 1.5 equiv vinyl heterocycle, 3.5 equiv 2-chloropyridine, CH<sub>2</sub>Cl<sub>2</sub> as solvent, reaction performed according to procedure 3.4

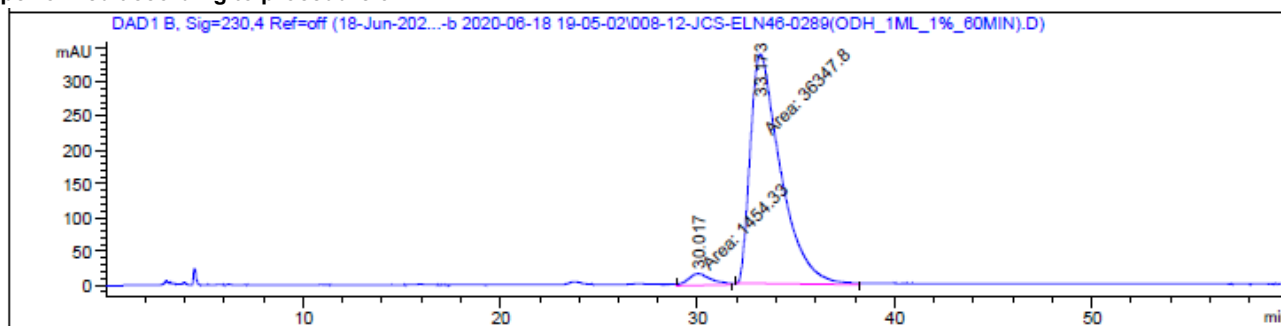

Signal 2: DAD1 B, Sig=230,4 Ref=off

| Peak # | RetTime [min] | Type | Width [min] | Area [mAU*s] | Height [mAU] | Area %  |
|--------|---------------|------|-------------|--------------|--------------|---------|
| 1      | 30.017        | MM   | 1.3712      | 1454.32605   | 17.67680     | 3.8472  |
| 2      | 33.173        | MM   | 1.7882      | 3.63478e4    | 338.76584    | 96.1528 |

Totals : 3.78022e4 356.44263

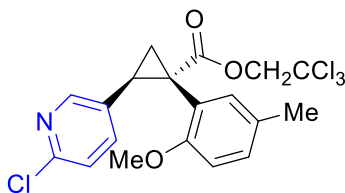

Table 2, Entry 7

Racemic Trace:

Chromatogram :

JCS-ELN-46-0018conc(ADH\_30min\_1mL\_0.5%-2

30nm6\_channel2

Method : ADH\_30min\_1mL\_0.5%-230nm6  
User : User1

Acquired : 7/17/2019 9:11:27 AM

Processed : 9/21/2020 5:15:00 PM

Printed : 9/21/2020 5:15:08 PM

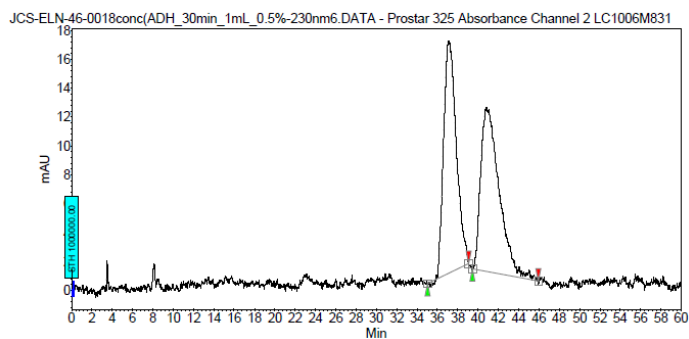

Peak results :

| Index | Name    | Time [Min] | Quantity [% Area] | Height [mAU] | Area [mAU.Min] | Area %  |
|-------|---------|------------|-------------------|--------------|----------------|---------|
| 1     | UNKNOWN | 37.07      | 49.19             | 16.1         | 23.1           | 49.195  |
| 2     | UNKNOWN | 40.77      | 50.81             | 11.4         | 23.9           | 50.805  |
| Total |         |            | 100.00            | 27.4         | 47.0           | 100.000 |

25 °C, 1.0 mol % Rh<sub>2</sub>(*R*-TPPTTL)<sub>4</sub>, 2.5 equiv vinyl heterocycle, CH<sub>2</sub>Cl<sub>2</sub> as solvent, reaction performed according to procedure 3.3

Chromatogram :

JCS-ELN-46-0019conc(ADH\_30min\_1mL\_0.5%-2

30nm16\_channel2

Method : ADH\_30min\_1mL\_0.5%-230nm

User : User1

Acquired : 7/17/2019 10:59:49 AM

Processed : 12/31/2019 12:36:29 PM

Printed : 9/21/2020 5:14:37 PM

JCS-ELN-46-0019conc(ADH\_30min\_1mL\_0.5%-230nm16.DATA - Prostar 325 Absorbance Channel 2 LC1006M831

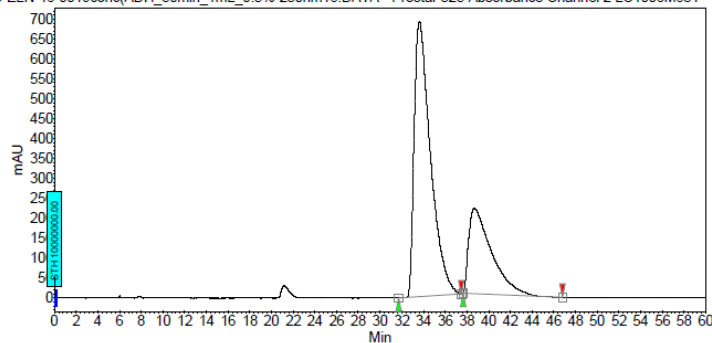

Peak results :

| Index | Name    | Time [Min] | Quantity [% Area] | Height [mAU] | Area [mAU.Min] | Area % [%] |
|-------|---------|------------|-------------------|--------------|----------------|------------|
| 1     | UNKNOWN | 33.83      | 69.60             | 660.8        | 1200.9         | 69.601     |
| 2     | UNKNOWN | 38.71      | 30.40             | 215.1        | 524.6          | 30.399     |
| Total |         |            | 100.00            | 905.9        | 1725.4         | 100.000    |

Racemic Trace:

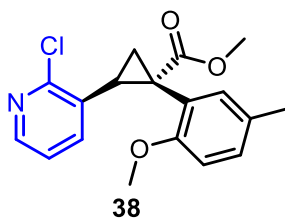

JCS-ELN46-0032supconc(OD-H\_1ml\_1%\_60min)3.DATA - Prostar 325 Absorbance Channel 2 LC1006M831

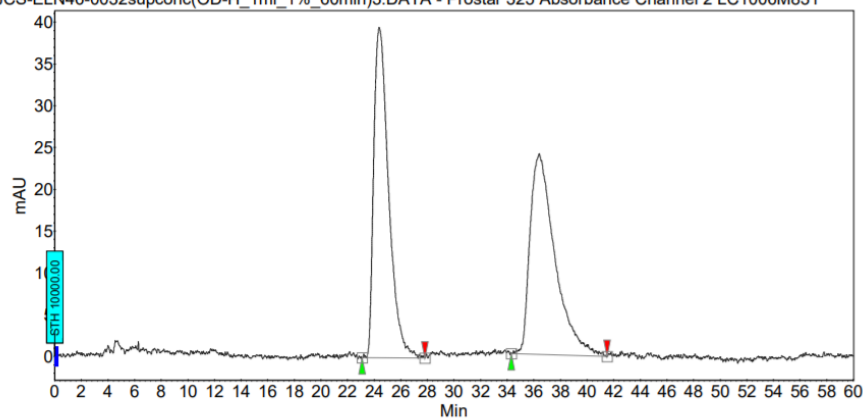

Peak results :

| Index | Name    | Time [Min] | Quantity [% Area] | Height [mAU] | Area [mAU.Min] | Area % [%] |
|-------|---------|------------|-------------------|--------------|----------------|------------|
| 1     | UNKNOWN | 24.36      | 49.68             | 39.5         | 51.3           | 49.675     |
| 2     | UNKNOWN | 36.40      | 50.32             | 24.0         | 52.0           | 50.325     |
| Total |         |            | 100.00            | 63.6         | 103.2          | 100.000    |

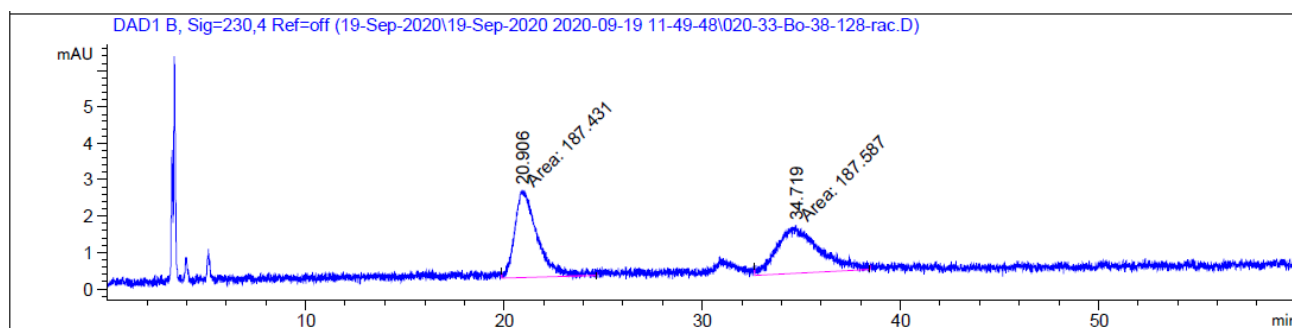

Signal 2: DAD1 B, Sig=230,4 Ref=off

| Peak # | RetTime [min] | Type | Width [min] | Area [mAU*s] | Height [mAU] | Area %  |
|--------|---------------|------|-------------|--------------|--------------|---------|
| 1      | 20.906        | MM   | 1.2927      | 187.43066    | 2.41649      | 49.9792 |
| 2      | 34.719        | MM   | 2.3695      | 187.58693    | 1.31948      | 50.0208 |

Totals : 375.01759 3.73597

0°C, 1.0 mol % Rh<sub>2</sub>(*R*-TPPTTL)<sub>4</sub> 5.0 equiv vinyl heterocycle, CH<sub>2</sub>Cl<sub>2</sub> as solvent, reaction performed according to procedure 3.3

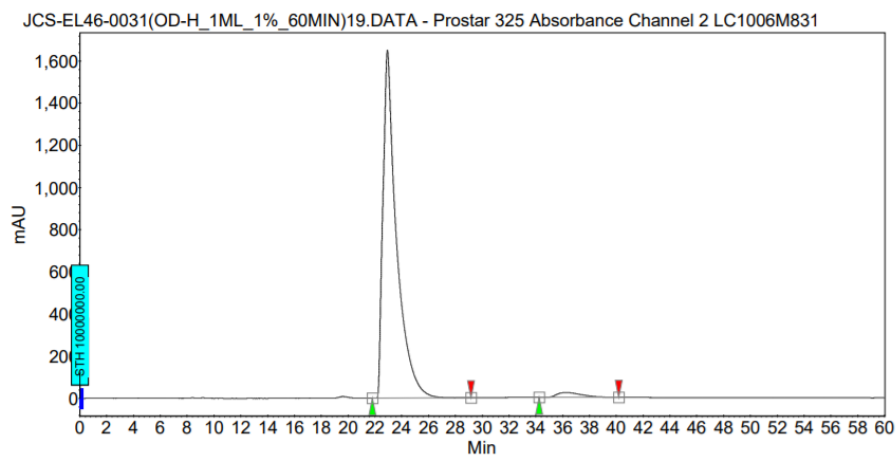

Peak results :

| Index | Name    | Time [Min] | Quantity [% Area] | Height [mAU] | Area [mAU.Min] | Area % [%] |
|-------|---------|------------|-------------------|--------------|----------------|------------|
| 1     | UNKNOWN | 22.93      | 97.43             | 1649.8       | 1929.1         | 97.427     |
| 2     | UNKNOWN | 36.26      | 2.57              | 23.4         | 50.9           | 2.573      |
| Total |         |            | 100.00            | 1673.3       | 1980.0         | 100.000    |

0 °C, 1.0 mol % Rh<sub>2</sub>(S-TPPTTL)<sub>4</sub>, 1.5 equiv vinyl heterocycle, 3.5 equiv 2-chloropyridine, CH<sub>2</sub>Cl<sub>2</sub> as solvent, 10 equiv HFIP, reaction performed according to procedure 3.5

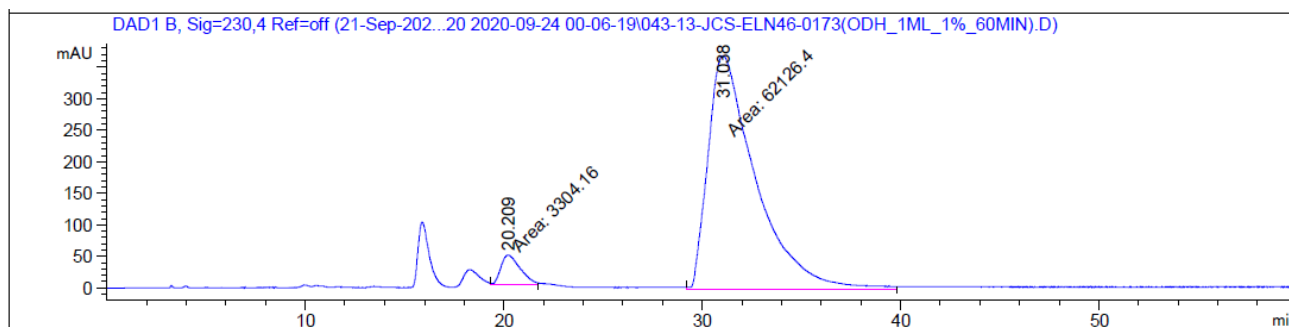

Racemic Trace:

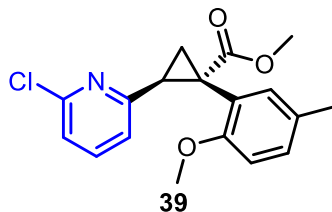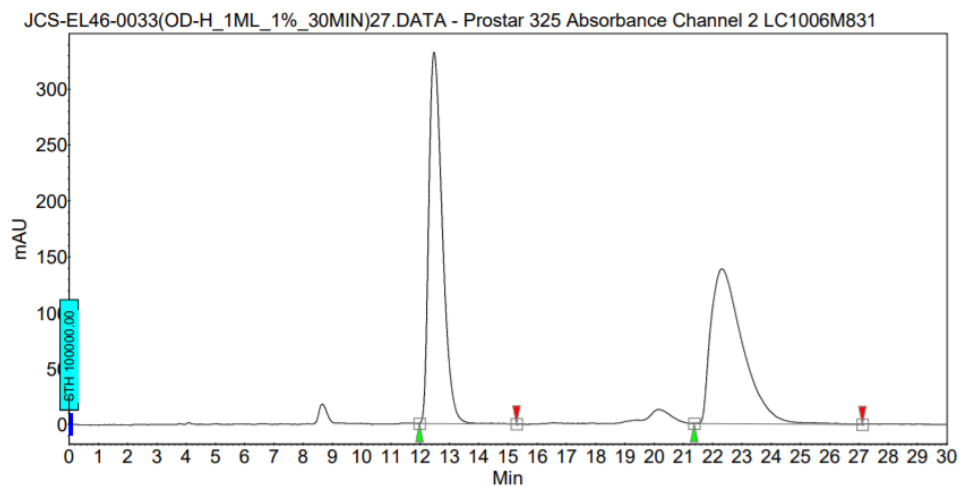

Peak results :

| Index | Name    | Time [Min] | Quantity [% Area] | Height [mAU] | Area [mAU.Min] | Area % [%] |
|-------|---------|------------|-------------------|--------------|----------------|------------|
| 1     | UNKNOWN | 12.48      | 50.48             | 332.2        | 178.2          | 50.479     |
| 2     | UNKNOWN | 22.31      | 49.52             | 138.6        | 174.9          | 49.521     |
| Total |         |            | 100.00            | 470.8        | 353.1          | 100.000    |

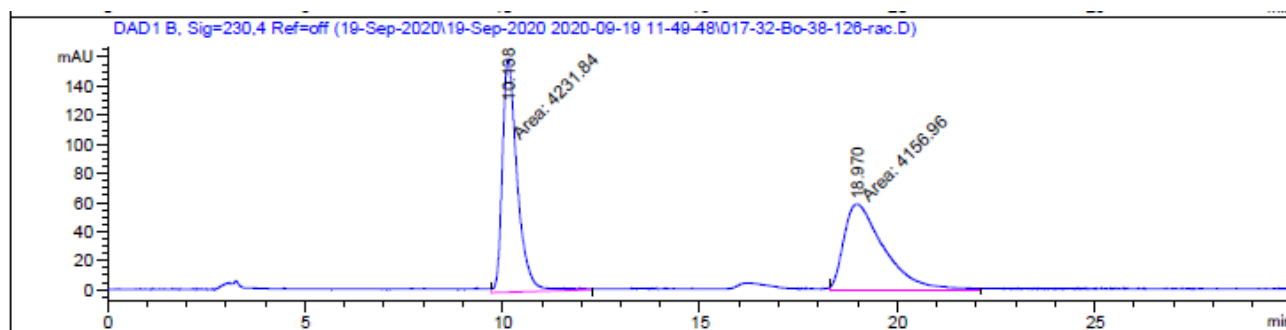

Signal 2: DAD1 B, Sig=230,4 Ref=off

| Peak # | RetTime [min] | Type | Width [min] | Area [mAU*s] | Height [mAU] | Area %  |
|--------|---------------|------|-------------|--------------|--------------|---------|
| 1      | 10.138        | MM   | 0.4400      | 4231.83789   | 160.27992    | 50.4463 |
| 2      | 18.970        | MM   | 1.1751      | 4156.95947   | 58.95683     | 49.5537 |

Totals : 8388.79736 219.23675

0 °C, 1.0 mol % Rh<sub>2</sub>(*R*-TPPTL)<sub>4</sub> 5.0 equiv vinyl heterocycle, CH<sub>2</sub>Cl<sub>2</sub> as solvent, reaction performed according to procedure 3.3

JCS-EL46-0034(OD-H\_1ML\_1%\_30MIN)30.DATA - Prostar 325 Absorbance Channel 2 LC1006M831

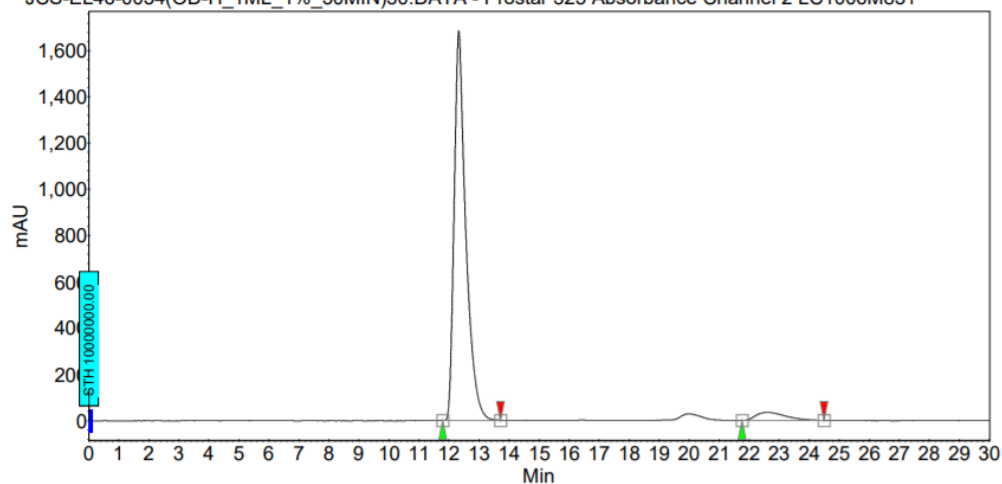

#### Peak results :

| Index | Name    | Time [Min] | Quantity [% Area] | Height [mAU] | Area [mAU.Min] | Area % [%] |
|-------|---------|------------|-------------------|--------------|----------------|------------|
| 1     | UNKNOWN | 12.32      | 94.97             | 1683.9       | 756.0          | 94.972     |
| 2     | UNKNOWN | 22.59      | 5.03              | 35.0         | 40.0           | 5.028      |
| Total |         |            | 100.00            | 1718.9       | 796.0          | 100.000    |

0 °C, 1.0 mol % Rh<sub>2</sub>(S-TPPTTL)<sub>4</sub>, 1.5 equiv vinyl heterocycle, 3.5 equiv 2-chloropyridine, CH<sub>2</sub>Cl<sub>2</sub> as solvent, 10 equiv HFIP, reaction performed according to procedure 3.5

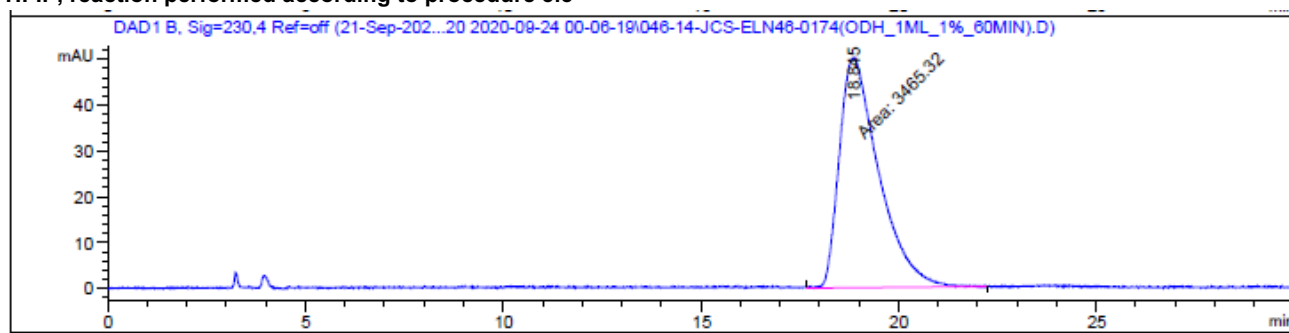

Signal 2: DAD1 B, Sig=230,4 Ref=off

| Peak # | RetTime [min] | Type | Width [min] | Area [mAU*s] | Height [mAU] | Area %   |
|--------|---------------|------|-------------|--------------|--------------|----------|
| 1      | 18.845        | MM   | 1.1559      | 3465.31787   | 49.96665     | 100.0000 |

Totals : 3465.31787 49.96665

Racemic trace:

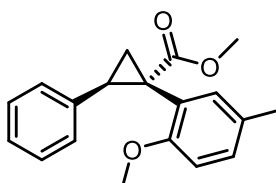

40

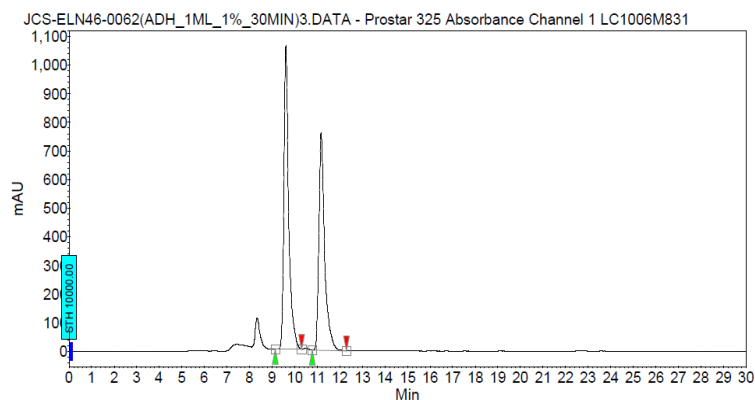

Peak results :

| Index | Name    | Time [Min] | Quantity [% Area] | Height [mAU] | Area [mAU.Min] | Area %  |
|-------|---------|------------|-------------------|--------------|----------------|---------|
| 1     | UNKNOWN | 9.61       | 53.67             | 1060.1       | 260.5          | 53.666  |
| 2     | UNKNOWN | 11.17      | 46.33             | 760.0        | 224.9          | 46.334  |
| Total |         |            | 100.00            | 1820.2       | 485.3          | 100.000 |

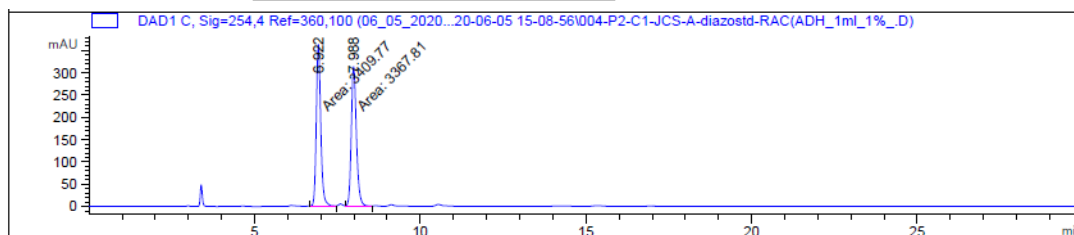

Signal 3: DAD1 C, Sig=254,4 Ref=360,100

| Peak # | RetTime [min] | Type | Width [min] | Area [mAU*s] | Height [mAU] | Area %  |
|--------|---------------|------|-------------|--------------|--------------|---------|
| 1      | 6.922         | MM   | 0.1564      | 3409.76978   | 363.26288    | 50.3095 |
| 2      | 7.988         | MM   | 0.1792      | 3367.81470   | 313.22736    | 49.6905 |

Totals : 6777.58447 676.49023

0 °C, 1.0 mol % Rh<sub>2</sub>(S-TPPTTL)<sub>4</sub> 5.0 equiv styrene, CH<sub>2</sub>Cl<sub>2</sub> as solvent, reaction performed according to procedure 3.3

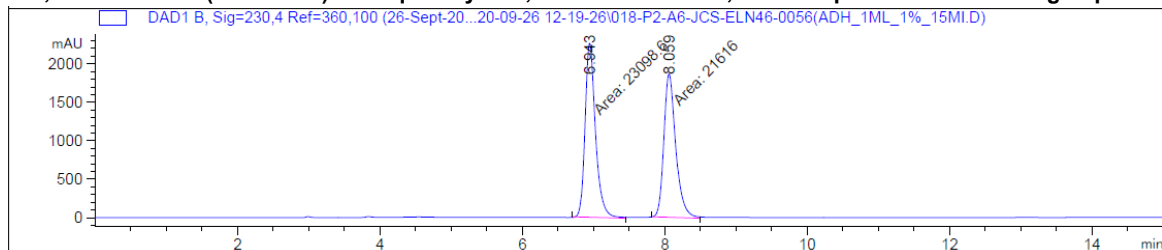

Signal 2: DAD1 B, Sig=230,4 Ref=360,100

| Peak # | RetTime [min] | Type | Width [min] | Area [mAU*s] | Height [mAU] | Area %  |
|--------|---------------|------|-------------|--------------|--------------|---------|
| 1      | 6.943         | MM   | 0.1701      | 2.30986e4    | 2263.13354   | 51.6578 |
| 2      | 8.059         | MM   | 0.1933      | 2.16160e4    | 1863.70142   | 48.3422 |

Totals : 4.47146e4 4126.83496

0 °C, 1.0 mol % Rh<sub>2</sub>(S-TPPTTL)<sub>4</sub> 5.0 equiv styrene, 1.0 equiv 2-chloropyridine, CH<sub>2</sub>Cl<sub>2</sub> as solvent, reaction performed according to procedure 3.4

Chromatogram :  
JCS-ELN46-0095DIL(ADH\_30MIN\_1mL\_1%)3\_cha

Prostar LC System  
Method : DACHDNB\_30min\_1mL\_1%-230nm  
User : User1

Acquired : 10/17/2019 9:55:29 AM  
Processed : 10/17/2019 10:44:45 AM  
Printed : 12/31/2019 12:32:50 PM

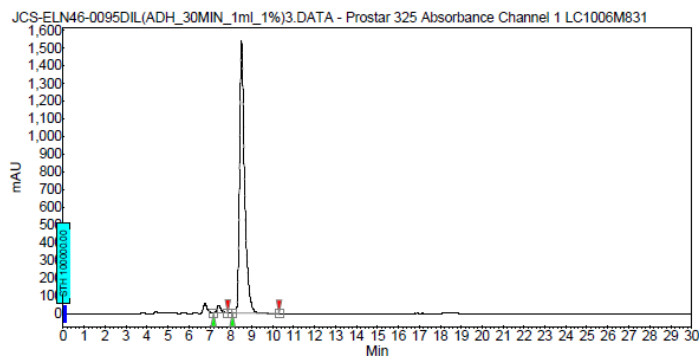

Peak results :

| Index | Name    | Time [Min] | Quantity [% Area] | Height [mAU] | Area [mAU.Min] | Area % [%] |
|-------|---------|------------|-------------------|--------------|----------------|------------|
| 2     | UNKNOWN | 7.41       | 2.41              | 44.3         | 10.6           | 2.413      |
| 1     | UNKNOWN | 8.52       | 97.59             | 1536.4       | 429.5          | 97.587     |
| Total |         |            | 100.00            | 1580.6       | 440.1          | 100.000    |

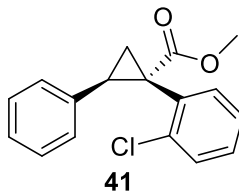

Racemic trace:

**Chromatogram :**  
**JCS-ELN46-0070(OJH\_1ml\_1%\_30min)6\_channe**

System : Prostar LC System  
 Method : OD\_30min\_1ml\_1%\_230nm  
 User : User1

Acquired : 10/2/2019 2:34:15 PM  
 Processed : 12/31/2019 12:46:22 PM  
 Printed : 12/31/2019 12:46:27 PM

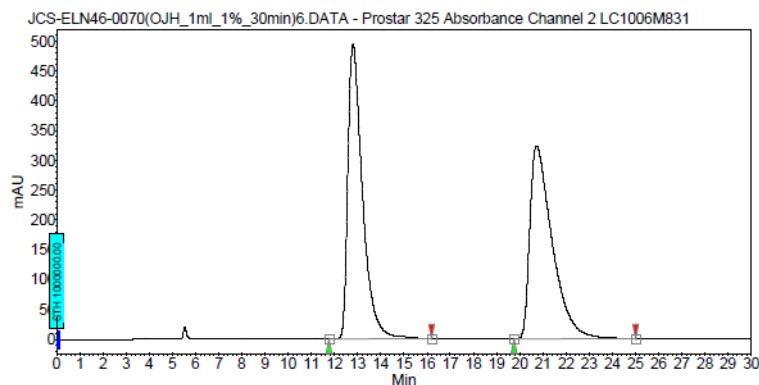

**Peak results :**

| Index | Name    | Time [Min] | Quantity [% Area] | Height [mAU] | Area [mAU.Min] | Area % [%] |
|-------|---------|------------|-------------------|--------------|----------------|------------|
| 1     | UNKNOWN | 12.80      | 49.85             | 493.8        | 360.6          | 49.854     |
| 2     | UNKNOWN | 20.73      | 50.15             | 323.5        | 362.7          | 50.146     |
| Total |         |            | 100.00            | 817.3        | 723.4          | 100.000    |

0 °C, 1.0 mol % Rh<sub>2</sub>(S-TPPTTL)<sub>4</sub> 5.0 equiv styrene, CH<sub>2</sub>Cl<sub>2</sub> as solvent, reaction performed according to procedure 3.3

**Chromatogram :**  
**JCS-ELN46-0071(OJH\_1ml\_1%\_30min)9\_channe**

System : Prostar LC System  
 Method : OD\_30min\_1ml\_1%\_230nm  
 User : User1

Acquired : 10/2/2019 3:51:39 PM  
 Processed : 12/31/2019 12:46:44 PM  
 Printed : 12/31/2019 12:46:49 PM

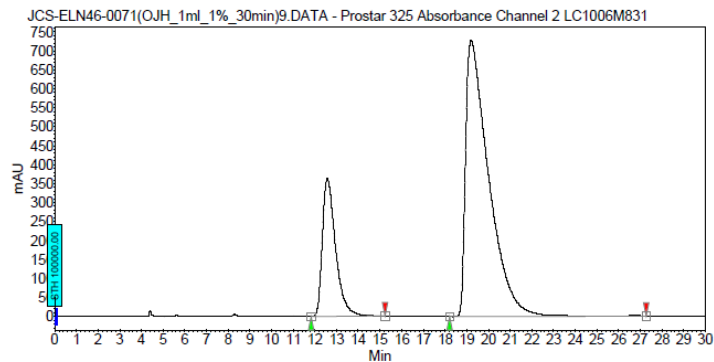

**Peak results :**

| Index | Name    | Time [Min] | Quantity [% Area] | Height [mAU] | Area [mAU.Min] | Area % [%] |
|-------|---------|------------|-------------------|--------------|----------------|------------|
| 1     | UNKNOWN | 12.57      | 22.27             | 363.9        | 267.5          | 22.266     |
| 2     | UNKNOWN | 19.20      | 77.73             | 728.1        | 898.8          | 77.734     |
| Total |         |            | 100.00            | 1092.0       | 1166.2         | 100.000    |

0 °C, 1.0 mol % Rh<sub>2</sub>(S-TPPTTL)<sub>4</sub> 5.0 equiv styrene, 1.0 equiv 2-chloropyridine, CH<sub>2</sub>Cl<sub>2</sub> as solvent, reaction performed according to procedure 3.4

Chromatogram :

JCS-ELN46-0072F7-8RERUNOJH\_1ML\_1%\_30MIN

58 channel2

Method: OD\_30min\_1mL\_1%\_230nm  
User: User1

Acquired : 10/4/2019 5:19:31 PM  
Processed : 12/31/2019 12:45:42 PM  
Printed : 12/31/2019 12:45:46 PM

JCS-ELN46-0072F7-8RERUNOJH\_1ML\_1%\_30MIN)58.DAT - Prostar 325 Absorbance Channel 2 LC1006M831

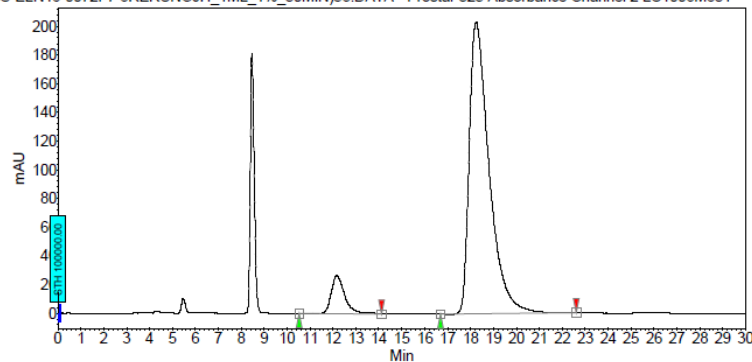

Peak results :

| Index | Name    | Time [Min] | Quantity [% Area] | Height [mAU] | Area [mAU.Min] | Area % [%] |
|-------|---------|------------|-------------------|--------------|----------------|------------|
| 1     | UNKNOWN | 12.17      | 8.19              | 26.5         | 18.2           | 8.194      |
| 2     | UNKNOWN | 18.24      | 91.81             | 203.3        | 204.2          | 91.806     |
| Total |         |            | 100.00            | 229.9        | 222.4          | 100.000    |

Racemic trace:

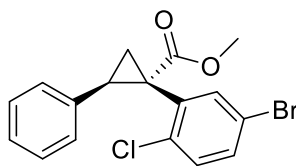

42

Chromatogram :

JCS-ELN46-0080(OJH\_1ML\_1%\_30MIN)11\_chann

el12

Method: OD\_30min\_1mL\_1%\_210\_230nm  
User: User1

Acquired : 10/8/2019 4:32:30 PM  
Processed : 10/8/2019 5:19:04 PM  
Printed : 12/31/2019 12:44:41 PM

JCS-ELN46-0080(OJH\_1ML\_1%\_30MIN)11.DAT - Prostar 325 Absorbance Channel 2 LC1006M831

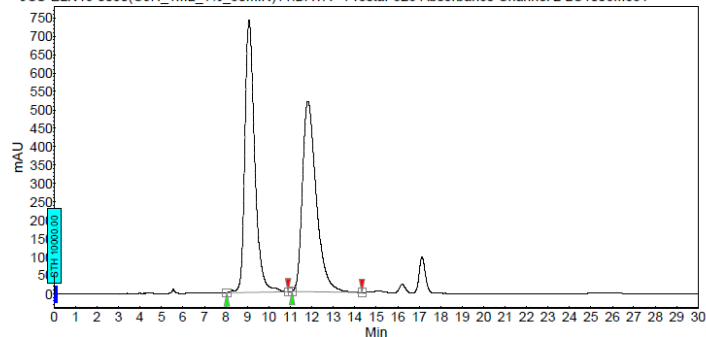

Peak results :

| Index | Name    | Time [Min] | Quantity [% Area] | Height [mAU] | Area [mAU.Min] | Area % [%] |
|-------|---------|------------|-------------------|--------------|----------------|------------|
| 1     | UNKNOWN | 9.07       | 50.51             | 739.1        | 394.0          | 50.510     |
| 2     | UNKNOWN | 11.82      | 49.49             | 516.8        | 386.0          | 49.490     |
| Total |         |            | 100.00            | 1255.9       | 780.0          | 100.000    |

0 °C, 1.0 mol % Rh<sub>2</sub>(S-TPPTTL)<sub>4</sub> 5.0 equiv styrene, CH<sub>2</sub>Cl<sub>2</sub> as solvent, reaction performed according to procedure 3.3

**Chromatogram :**  
JCS-ELN46-0078(OJH\_1ML\_1%\_30MIN)14\_chann

Method: Prostar LC System  
Method: OD\_30min\_1mL\_1%\_210\_230nm  
User: User1

Acquired: 10/8/2019 5:49:55 PM  
Processed: 10/9/2019 8:51:34 AM  
Printed: 12/31/2019 12:44:37 PM

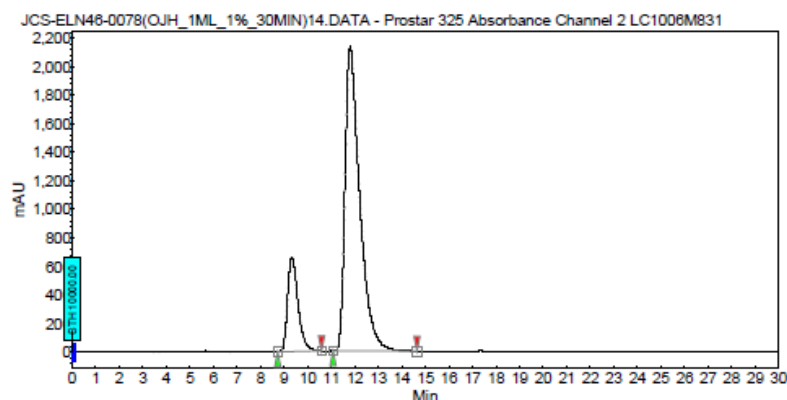

**Peak results :**

| Index | Name    | Time [Min] | Quantity [% Area] | Height [mAU] | Area [mAU.Min] | Area % [%] |
|-------|---------|------------|-------------------|--------------|----------------|------------|
| 1     | UNKNOWN | 9.33       | 18.01             | 664.7        | 338.8          | 18.006     |
| 2     | UNKNOWN | 11.81      | 81.99             | 2130.8       | 1542.8         | 81.994     |
| Total |         |            | 100.00            | 2795.5       | 1881.6         | 100.000    |

0 °C, 1.0 mol % Rh<sub>2</sub>(S-TPPTTL)<sub>4</sub> 5.0 equiv styrene, 1.0 equiv 2-chloropyridine, CH<sub>2</sub>Cl<sub>2</sub> as solvent, reaction performed according to procedure 3.4

**Chromatogram :**  
JCS-ELN46-0079DIL(OJH\_30MIN\_1ML\_1%)3\_cha

Method: Prostar LC System  
Method: OD\_30min\_1mL\_1%\_230nm  
User: User1

Acquired: 10/9/2019 9:44:19 AM  
Processed: 12/31/2019 12:43:26 PM  
Printed: 12/31/2019 12:43:28 PM

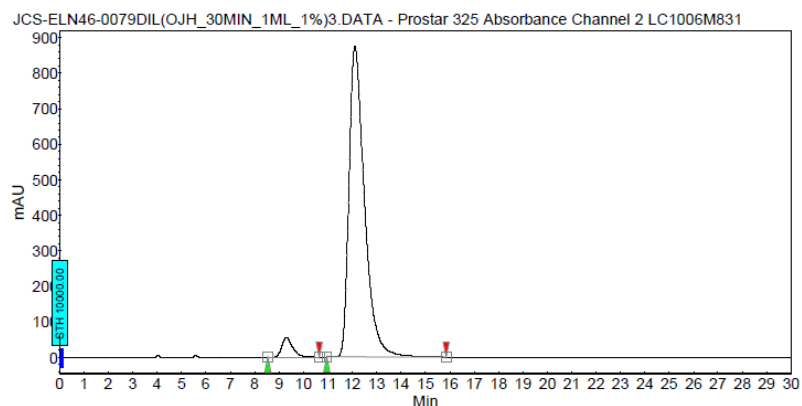

**Peak results :**

| Index | Name    | Time [Min] | Quantity [% Area] | Height [mAU] | Area [mAU.Min] | Area % [%] |
|-------|---------|------------|-------------------|--------------|----------------|------------|
| 1     | UNKNOWN | 9.30       | 4.30              | 55.7         | 29.0           | 4.303      |
| 2     | UNKNOWN | 12.11      | 95.70             | 872.6        | 643.9          | 95.697     |
| Total |         |            | 100.00            | 928.3        | 672.8          | 100.000    |

Racemic trace:

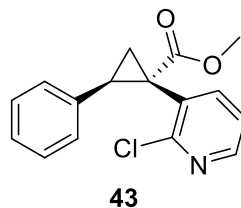

**Chromatogram :**  
**JCS-ELN46-0040(ADH\_1ml\_1%\_60min)2\_channe**

System : Prostar LC System  
 Method : DACHDNB\_30min\_1ml\_1%-230nm  
 User : User1  
 Acquired : 8/23/2019 10:20:38 AM  
 Processed : 8/26/2019 10:23:30 AM  
 Printed : 9/30/2020 3:27:58 PM

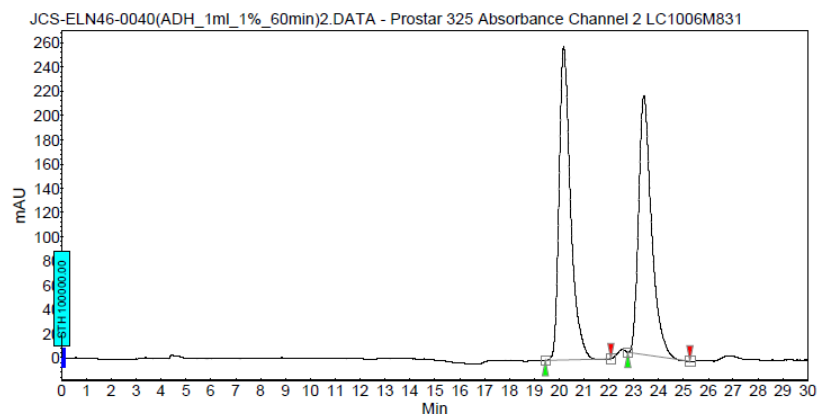

**Peak results :**

| Index | Name    | Time [Min] | Quantity [% Area] | Height [mAU] | Area [mAU.Min] | Area % [%] |
|-------|---------|------------|-------------------|--------------|----------------|------------|
| 1     | UNKNOWN | 20.19      | 51.66             | 258.3        | 138.2          | 51.657     |
| 2     | UNKNOWN | 23.41      | 48.34             | 214.0        | 129.4          | 48.343     |
| Total |         |            | 100.00            | 472.3        | 267.6          | 100.000    |

0 °C, 1.0 mol % Rh<sub>2</sub>(R-TPPTTL)<sub>4</sub> 5.0 equiv styrene, CH<sub>2</sub>Cl<sub>2</sub> as solvent, reaction performed according to procedure 3.3

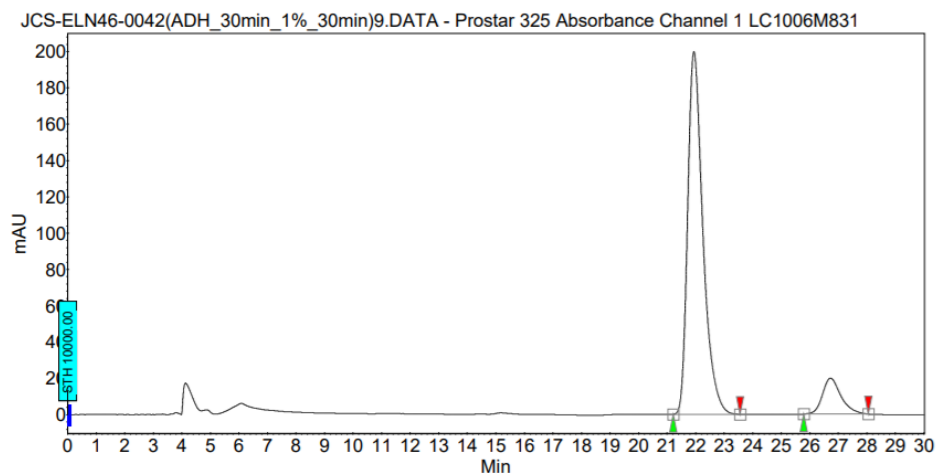

**Peak results :**

| Index | Name    | Time [Min] | Quantity [% Area] | Height [mAU] | Area [mAU.Min] | Area % [%] |
|-------|---------|------------|-------------------|--------------|----------------|------------|
| 1     | UNKNOWN | 21.94      | 89.24             | 199.8        | 123.6          | 89.238     |
| 2     | UNKNOWN | 26.72      | 10.76             | 19.8         | 14.9           | 10.762     |
| Total |         |            | 100.00            | 219.6        | 138.5          | 100.000    |

0 °C, 1.0 mol % Rh<sub>2</sub>(S-TPPTTL)<sub>4</sub> 5.0 equiv styrene, 1.0 equiv 2-chloropyridine, CH<sub>2</sub>Cl<sub>2</sub> as solvent, reaction performed according to procedure 3.4

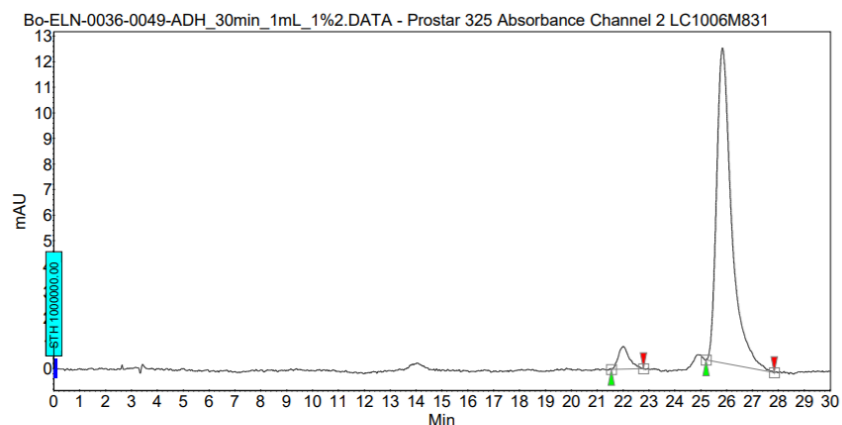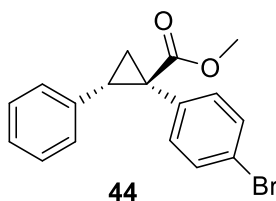

Racemic trace:

**Chromatogram :**  
JCS-ELN46-0109(OJH\_1mL\_1%\_30min)3\_channe

System : Prostar LC System  
Method : S4900\_30min\_1mL\_1%\_230nm  
User : User1  
Acquired : 10/29/2019 5:28:42 PM  
Processed : 10/30/2019 9:10:55 AM  
Printed : 12/31/2019 12:29:24 PM

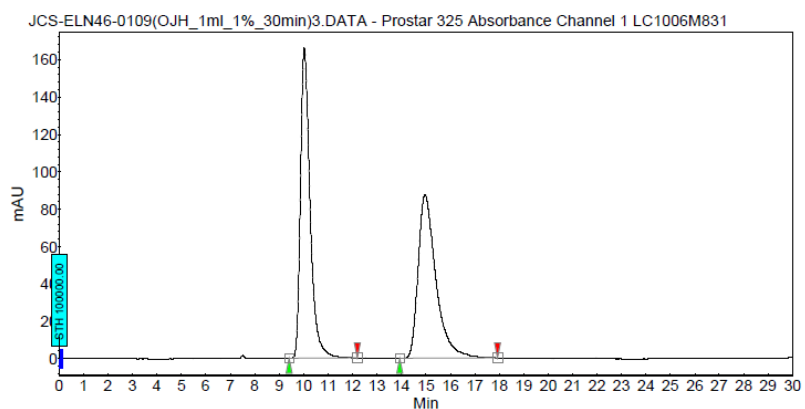

0 °C , 1.0 mol % Rh<sub>2</sub>(S-TPPTTL)<sub>4</sub> 5.0 equiv styrene, CH<sub>2</sub>Cl<sub>2</sub> as solvent, reaction performed according to procedure 3.3

**Chromatogram :**  
JCS-ELN46-0110(OJH\_1ml\_1%\_30min)6\_chan

System : Prostar LC System  
Method : S4900\_30min\_1ml\_1%\_230nm  
User : User1  
Acquired : 10/29/2019 6:46:05 PM  
Processed : 10/30/2019 9:11:19 AM  
Printed : 12/31/2019 12:29:32 PM

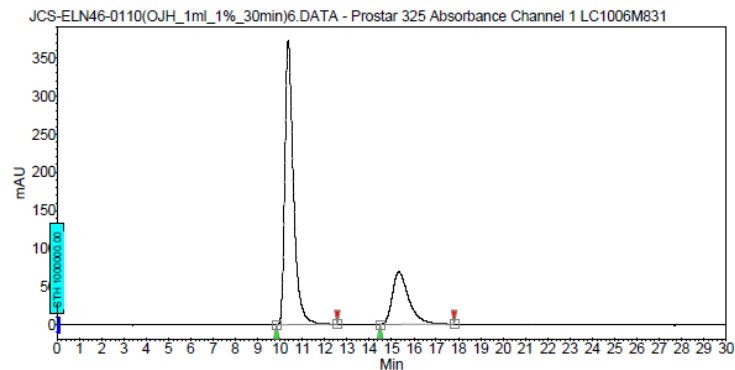

**Peak results :**

| Index | Name    | Time [Min] | Quantity [% Area] | Height [mAU] | Area [mAU.Min] | Area % [%] |
|-------|---------|------------|-------------------|--------------|----------------|------------|
| 1     | UNKNOWN | 10.37      | 73.78             | 371.9        | 166.1          | 73.781     |
| 2     | UNKNOWN | 15.33      | 26.22             | 68.7         | 59.0           | 26.219     |
| Total |         |            | 100.00            | 440.6        | 225.1          | 100.000    |

0 °C , 1.0 mol % Rh<sub>2</sub>(S-TPPTTL)<sub>4</sub> 5.0 equiv styrene, 1.0 equiv 2-chloropyridine, CH<sub>2</sub>Cl<sub>2</sub> as solvent, reaction performed according to procedure 3.4

**Chromatogram :**  
JCS-ELN46-0111(OJH\_1ml\_1%\_30min)9\_chan

System : Prostar LC System  
Method : S4900\_30min\_1ml\_1%\_230nm  
User : User1  
Acquired : 10/29/2019 8:03:22 PM  
Processed : 10/30/2019 9:11:45 AM  
Printed : 12/31/2019 12:29:28 PM

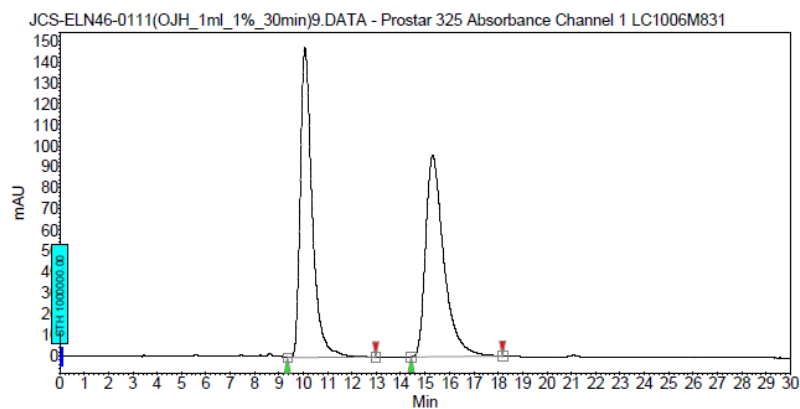

**Peak results :**

| Index | Name    | Time [Min] | Quantity [% Area] | Height [mAU] | Area [mAU.Min] | Area % [%] |
|-------|---------|------------|-------------------|--------------|----------------|------------|
| 1     | UNKNOWN | 10.07      | 50.07             | 147.5        | 83.6           | 50.070     |
| 2     | UNKNOWN | 15.31      | 49.93             | 95.7         | 83.4           | 49.930     |
| Total |         |            | 100.00            | 243.3        | 167.0          | 100.000    |

Racemic trace:

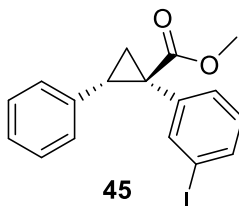

Chromatogram :  
JCS-ELN46-0181(ODH\_30MIN\_1ML\_1%)48\_chann

Method : Prostar LC System  
Method : ADH\_30min\_1mL\_1%-230nm  
User : User1  
Acquired : 12/11/2019 4:01:46 PM  
Processed : 12/12/2019 9:38:09 AM  
Printed : 12/31/2019 12:05:13 PM

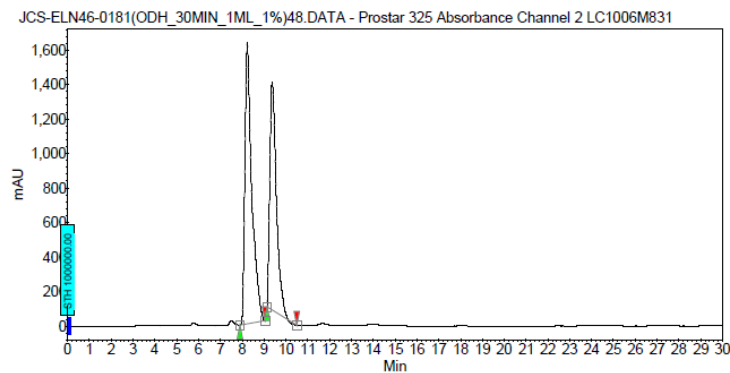

Peak results :

| Index | Name    | Time [Min] | Quantity [% Area] | Height [mAU] | Area [mAU.Min] | Area % [%] |
|-------|---------|------------|-------------------|--------------|----------------|------------|
| 1     | UNKNOWN | 8.23       | 56.24             | 1631.2       | 562.4          | 56.236     |
| 2     | UNKNOWN | 9.37       | 43.76             | 1320.4       | 461.0          | 43.764     |
| Total |         |            | 100.00            | 2951.6       | 1023.3         | 100.000    |

0 °C, 1.0 mol % Rh<sub>2</sub>(S-TPPTTL)<sub>4</sub> 5.0 equiv styrene, CH<sub>2</sub>Cl<sub>2</sub> as solvent, reaction performed according to procedure 3.3

Chromatogram :  
JCS-ELN46-0182(ODH\_30MIN\_1ML\_1%)51\_chann

Method : Prostar LC System  
Method : ADH\_30min\_1mL\_1%-230nm  
User : User1  
Acquired : 12/11/2019 5:19:44 PM  
Processed : 12/12/2019 9:38:35 AM  
Printed : 12/31/2019 12:05:08 PM

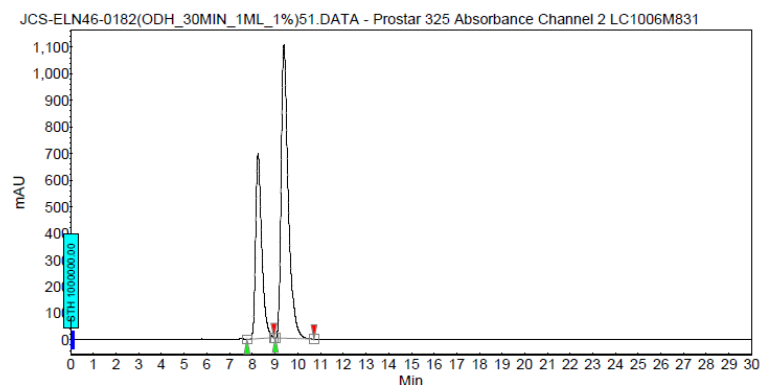

Peak results :

| Index | Name    | Time [Min] | Quantity [% Area] | Height [mAU] | Area [mAU.Min] | Area % [%] |
|-------|---------|------------|-------------------|--------------|----------------|------------|
| 1     | UNKNOWN | 8.25       | 35.34             | 699.4        | 221.1          | 35.336     |
| 2     | UNKNOWN | 9.39       | 64.66             | 1102.8       | 404.6          | 64.664     |
| Total |         |            | 100.00            | 1802.3       | 625.7          | 100.000    |

0 °C, 1.0 mol % Rh<sub>2</sub>(S-TPPTTL)<sub>4</sub> 5.0 equiv styrene, 1.0 equiv 2-chloropyridine, CH<sub>2</sub>Cl<sub>2</sub> as solvent, reaction performed according to procedure 3.4

# Chromatogram :

JCS-ELN46-0183P1(ODH\_30MIN\_1mL\_1%)54\_ch

Method : ADH\_30min\_1mL\_1%-230nm  
User : User1

Acquired : 12/11/2019 6:37:10 PM  
Processed : 12/12/2019 9:39:14 AM  
Printed : 12/31/2019 12:04:57 PM

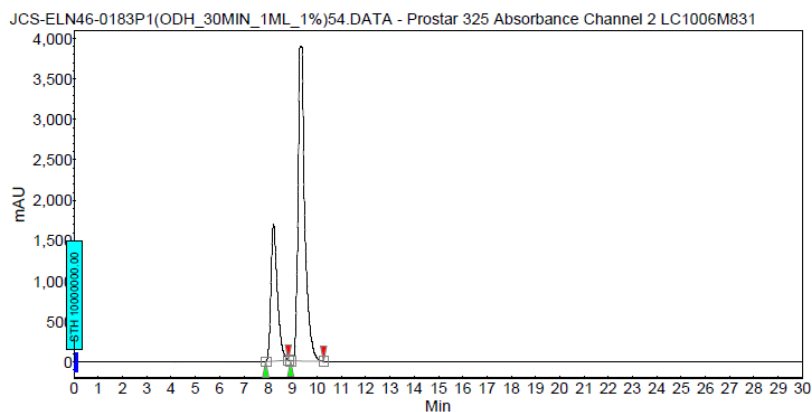

## Peak results :

| Index | Name    | Time [Min] | Quantity [% Area] | Height [mAU] | Area [mAU.Min] | Area % [%] |
|-------|---------|------------|-------------------|--------------|----------------|------------|
| 1     | UNKNOWN | 8.21       | 29.17             | 1691.5       | 523.5          | 29.169     |
| 2     | UNKNOWN | 9.36       | 70.83             | 3884.5       | 1271.2         | 70.831     |
| Total |         |            | 100.00            | 5576.1       | 1794.8         | 100.000    |

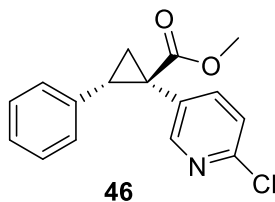

## Racemic trace:

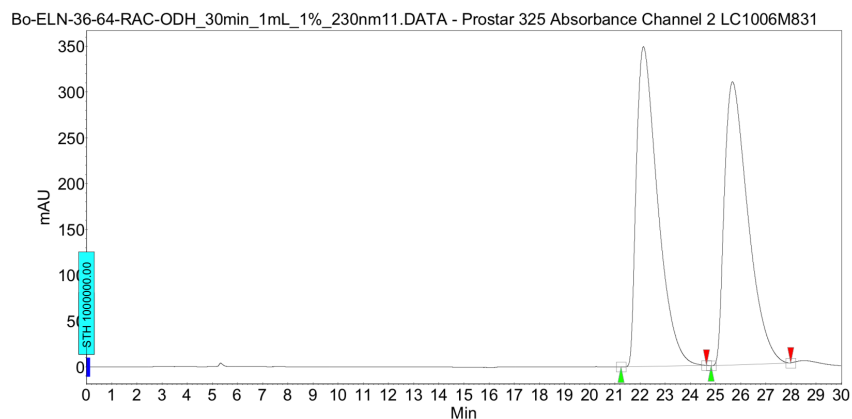

## Peak results :

| Index | Name    | Time [Min] | Quantity [% Area] | Height [mAU] | Area [mAU.Min] | Area % [%] |
|-------|---------|------------|-------------------|--------------|----------------|------------|
| 1     | UNKNOWN | 22.14      | 50.51             | 349.2        | 341.9          | 50.507     |
| 2     | UNKNOWN | 25.67      | 49.49             | 309.1        | 335.0          | 49.493     |
| Total |         |            | 100.00            | 658.2        | 676.9          | 100.000    |

0 °C, 1.0 mol % Rh<sub>2</sub>(S-TPPTTL)<sub>4</sub> 5.0 equiv styrene, CH<sub>2</sub>Cl<sub>2</sub> as solvent, reaction performed according to procedure 3.3

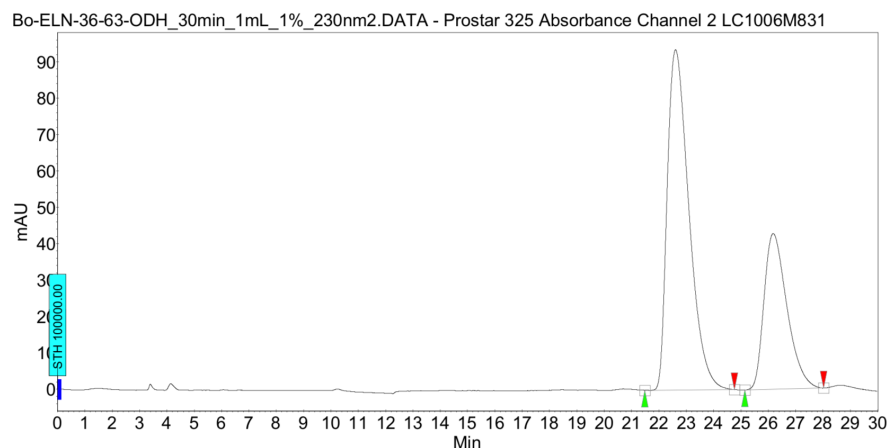

**Peak results :**

| Index | Name    | Time [Min] | Quantity [% Area] | Height [mAU] | Area [mAU.Min] | Area % [%] |
|-------|---------|------------|-------------------|--------------|----------------|------------|
| 1     | UNKNOWN | 22.61      | 67.37             | 93.5         | 86.0           | 67.366     |
| 2     | UNKNOWN | 26.18      | 32.63             | 42.8         | 41.6           | 32.634     |
| Total |         |            | 100.00            | 136.3        | 127.6          | 100.000    |

0 °C, 1.0 mol % Rh<sub>2</sub>(S-TPPTTL)<sub>4</sub> 5.0 equiv styrene, 1.0 equiv 2-chloropyridine, CH<sub>2</sub>Cl<sub>2</sub> as solvent, reaction performed according to procedure 3.4

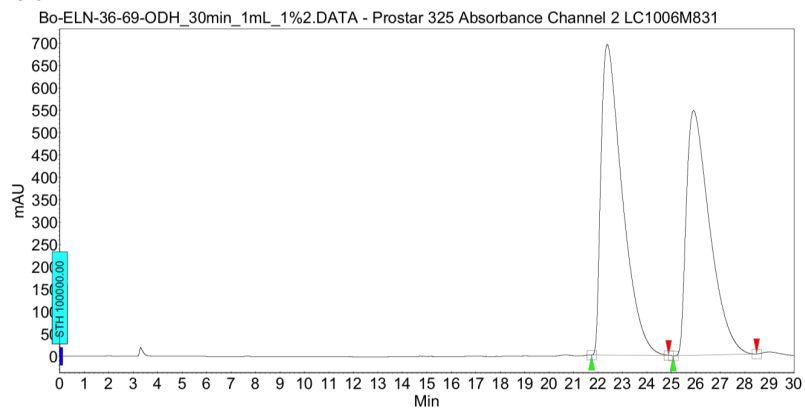

**Peak results :**

| Index | Name    | Time [Min] | Quantity [% Area] | Height [mAU] | Area [mAU.Min] | Area % [%] |
|-------|---------|------------|-------------------|--------------|----------------|------------|
| 1     | UNKNOWN | 22.38      | 53.63             | 694.8        | 701.8          | 53.635     |
| 2     | UNKNOWN | 25.91      | 46.37             | 547.3        | 606.6          | 46.365     |
| Total |         |            | 100.00            | 1242.1       | 1308.4         | 100.000    |

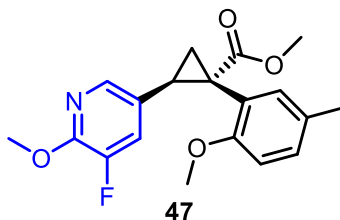

Racemic trace:

**Chromatogram :**  
**JCS-ELN46-0160(ODH\_30min\_1ml\_1%)6\_channe**

System : Prostar LC System  
 Method : ADH\_30min\_1ml\_1%-230nm  
 User : User1  
 Acquired : 11/26/2019 12:28:10 PM  
 Processed : 11/30/2019 1:57:41 PM  
 Printed : 12/31/2019 12:16:50 PM

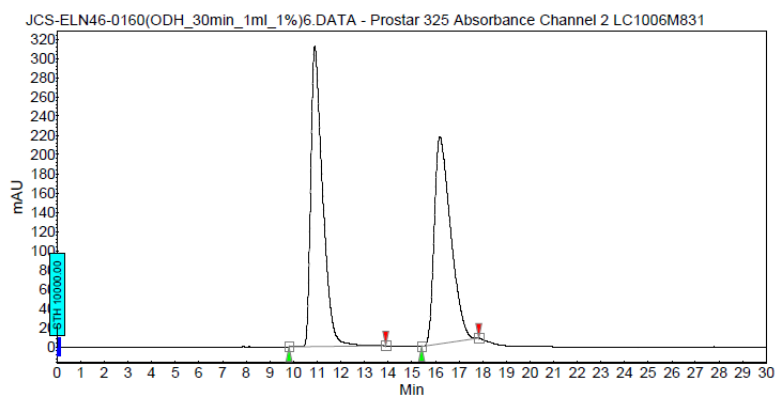

**Peak results :**

| Index | Name    | Time [Min] | Quantity [% Area] | Height [mAU] | Area [mAU.Min] | Area % [%] |
|-------|---------|------------|-------------------|--------------|----------------|------------|
| 1     | UNKNOWN | 10.90      | 51.23             | 312.1        | 182.2          | 51.230     |
| 2     | UNKNOWN | 16.19      | 48.77             | 215.7        | 173.4          | 48.770     |
| Total |         |            | 100.00            | 527.8        | 355.6          | 100.000    |

0 °C, 1.0 mol % Rh<sub>2</sub>(S-TPPTTL)<sub>4</sub> 5.0 equiv vinyl heterocycle, CH<sub>2</sub>Cl<sub>2</sub> as solvent, reaction performed according to procedure 3.3

**Chromatogram :**  
**JCS-ELN46-0161(ODH\_30min\_1ml\_1%)18\_chann**

System : Prostar LC System  
 Method : ADH\_30min\_1ml\_1%-230nm  
 User : User1  
 Acquired : 11/26/2019 5:37:20 PM  
 Processed : 11/27/2019 9:48:33 AM  
 Printed : 11/30/2019 1:58:04 PM

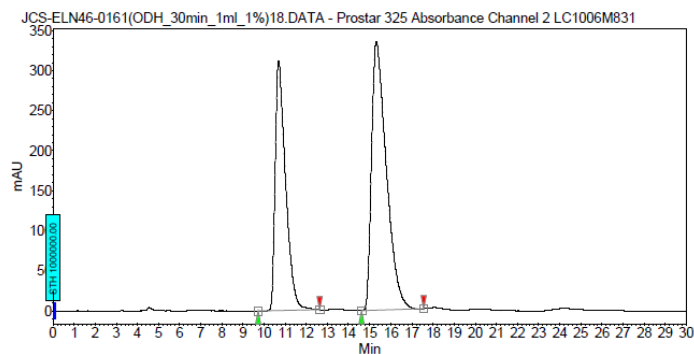

**Peak results :**

| Index | Name    | Time [Min] | Quantity [% Area] | Height [mAU] | Area [mAU.Min] | Area % [%] |
|-------|---------|------------|-------------------|--------------|----------------|------------|
| 2     | UNKNOWN | 10.69      | 39.64             | 312.2        | 178.6          | 39.641     |
| 1     | UNKNOWN | 15.32      | 60.36             | 335.3        | 272.0          | 60.359     |
| Total |         |            | 100.00            | 647.6        | 450.6          | 100.000    |

0 °C, 1.0 mol % Rh<sub>2</sub>(S-TPPTTL)<sub>4</sub> 1.5 equiv vinyl heterocycle, 3.5 equiv 2-chloropyridine, CH<sub>2</sub>Cl<sub>2</sub> as solvent, reaction performed according to procedure 3.4

**Chromatogram :**

**JCS-ELN46-0162(ODH\_30min\_1mL\_1%)21\_chann**

Method: Prostar LC System  
Method: ADH\_30min\_1mL\_1%-230nm  
User: User1

Acquired: 11/26/2019 6:54:58 PM  
Processed: 11/30/2019 1:58:24 PM  
Printed: 12/31/2019 12:18:37 PM

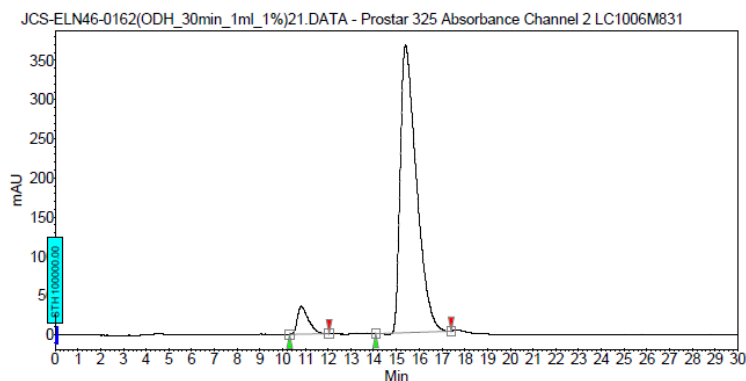

**Peak results :**

| Index | Name    | Time [Min] | Quantity [% Area] | Height [mAU] | Area [mAU.Min] | Area % [%] |
|-------|---------|------------|-------------------|--------------|----------------|------------|
| 1     | UNKNOWN | 10.82      | 8.24              | 35.7         | 20.1           | 6.239      |
| 2     | UNKNOWN | 15.40      | 93.76             | 387.4        | 301.3          | 93.761     |
| Total |         |            | 100.00            | 403.1        | 321.4          | 100.000    |

0 °C, 1.0 mol % Rh<sub>2</sub>(S-TPPTTL)<sub>4</sub> 1.5 equiv vinyl heterocycle, 3.5 equiv 2-chloropyridine, CH<sub>2</sub>Cl<sub>2</sub> as solvent, 10 equiv HFIP, reaction performed according to procedure 3.5

**Chromatogram :**

**JCS-ELN46-0186(ODH\_1ML\_1%\_30MIN)70\_chann**

Method: Prostar LC System  
Method: ADH\_30min\_1mL\_1%-230nm  
User: User1

Acquired: 12/11/2019 11:59:57 PM  
Processed: 12/12/2019 9:45:57 AM  
Printed: 12/31/2019 12:04:34 PM

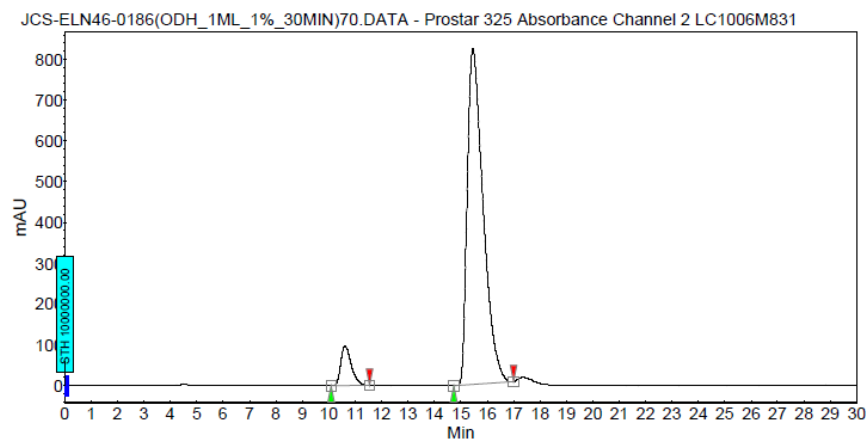

**Peak results :**

| Index | Name    | Time [Min] | Quantity [% Area] | Height [mAU] | Area [mAU.Min] | Area % [%] |
|-------|---------|------------|-------------------|--------------|----------------|------------|
| 1     | UNKNOWN | 10.61      | 7.21              | 97.1         | 44.4           | 7.209      |
| 2     | UNKNOWN | 15.46      | 92.79             | 821.4        | 571.9          | 92.791     |
| Total |         |            | 100.00            | 918.5        | 616.3          | 100.000    |

Racemic Trace:

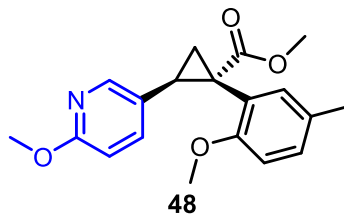

Chromatogram :  
JCS-ELN46-0103(ODH\_30MIN\_1ML\_1%)16\_chann

Method: Prostar LC System  
Method: ADH\_30min\_1mL\_1%-230nm  
User: User1  
Acquired: 10/17/2019 6:04:06 PM  
Processed: 10/18/2019 8:04:05 AM  
Printed: 10/23/2019 4:33:17 PM

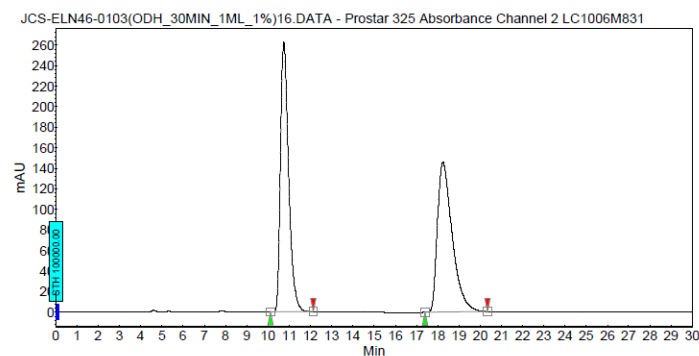

Peak results :

| Index | Name    | Time [Min] | Quantity [% Area] | Height [mAU] | Area [mAU.Min] | Area % [%] |
|-------|---------|------------|-------------------|--------------|----------------|------------|
| 1     | UNKNOWN | 10.74      | 49.79             | 252.2        | 117.0          | 49.782     |
| 2     | UNKNOWN | 18.24      | 50.21             | 145.9        | 118.0          | 50.208     |
| Total |         |            | 100.00            | 408.0        | 234.9          | 100.000    |

0 °C, 1.0 mol % Rh<sub>2</sub>(S-TPPTTL)<sub>4</sub>, 1.5 equiv vinyl heterocycle, 3.5 equiv 2-chloropyridine, CH<sub>2</sub>Cl<sub>2</sub> as solvent, reaction performed according to procedure 3.4

Chromatogram :  
JCS-ELN46-0106(ODH\_30MIN\_1ML\_1%)25\_chann

Method: Prostar LC System  
Method: ADH\_30min\_1mL\_1%-230nm  
User: User1  
Acquired: 10/17/2019 9:56:08 PM  
Processed: 10/18/2019 8:05:47 AM  
Printed: 12/31/2019 12:32:45 PM

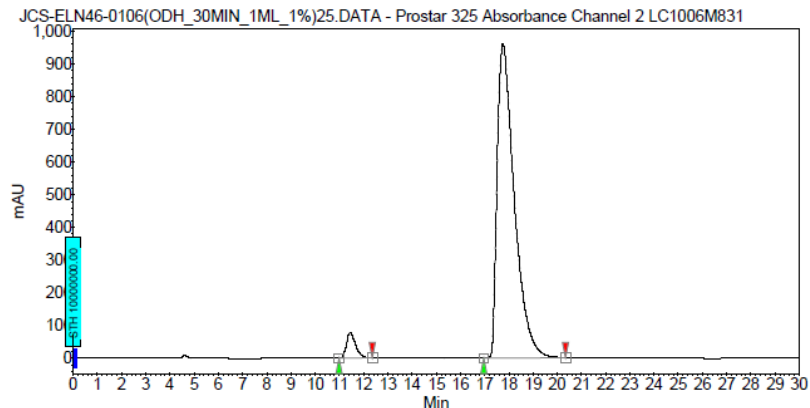

Peak results :

| Index | Name    | Time [Min] | Quantity [% Area] | Height [mAU] | Area [mAU.Min] | Area % [%] |
|-------|---------|------------|-------------------|--------------|----------------|------------|
| 1     | UNKNOWN | 11.45      | 4.11              | 77.2         | 33.7           | 4.108      |
| 2     | UNKNOWN | 17.75      | 95.89             | 961.0        | 787.3          | 95.894     |
| Total |         |            | 100.00            | 1038.2       | 821.0          | 100.000    |

0 °C, 1.0 mol % Rh<sub>2</sub>(S-TPPTTL)<sub>4</sub>, 1.5 equiv vinyl heterocycle, 3.5 equiv 2-chloropyridine, CH<sub>2</sub>Cl<sub>2</sub> as solvent, 10 equiv HFIP, reaction performed according to procedure 3.5

**Chromatogram :**

**JCS-ELN46-0172(ODH\_30MIN\_1ML\_1%)12\_chann**

Method : Prostar LC System  
Method : ADH\_30min\_1mL\_1%-230nm  
User : User1

Acquired : 11/30/2019 6:11:24 PM  
Processed : 12/2/2019 8:41:54 AM  
Printed : 12/31/2019 12:15:28 PM

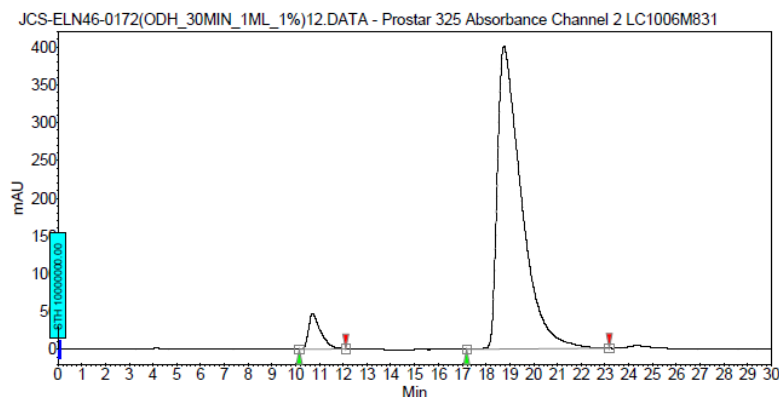

**Peak results :**

| Index | Name    | Time [Min] | Quantity [% Area] | Height [mAU] | Area [mAU.Min] | Area % [%] |
|-------|---------|------------|-------------------|--------------|----------------|------------|
| 1     | UNKNOWN | 10.71      | 5.61              | 47.2         | 27.8           | 5.609      |
| 2     | UNKNOWN | 18.76      | 94.39             | 400.5        | 468.1          | 94.391     |
| Total |         |            | 100.00            | 447.7        | 495.9          | 100.000    |

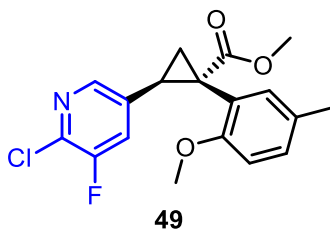

**Racemic trace:**

**Chromatogram :**

**JCS-ELN46-0189RE(R,R-WHELK\_60MIN\_1ML\_1%)3\_channel2**

Method : Prostar LC System  
Method : OD\_30min\_1mL\_1%-230nm  
User : User1

Acquired : 12/16/2019 9:41:58 AM  
Processed : 12/16/2019 3:26:28 PM  
Printed : 12/31/2019 12:59:07 PM

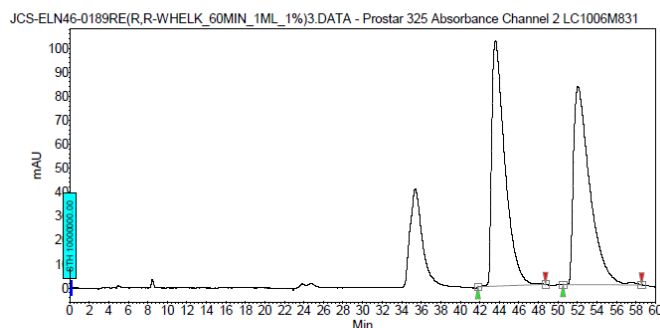

**Peak results :**

| Index | Name    | Time [Min] | Quantity [% Area] | Height [mAU] | Area [mAU.Min] | Area % [%] |
|-------|---------|------------|-------------------|--------------|----------------|------------|
| 1     | UNKNOWN | 43.60      | 46.93             | 102.4        | 160.2          | 46.933     |
| 2     | UNKNOWN | 52.06      | 50.07             | 62.8         | 160.7          | 50.067     |
| Total |         |            | 100.00            | 165.1        | 320.9          | 100.000    |

0 °C, 1.0 mol % Rh<sub>2</sub>(S-TPPTTL)<sub>4</sub> 1.5 equiv vinyl heterocycle, 3.5 equiv 2-chloropyridine, CH<sub>2</sub>Cl<sub>2</sub> as solvent, reaction performed according to procedure 3.4

**Chromatogram :**

**JCS-ELN46-0192(WHELK\_60MIN\_1ML\_1%)16\_ch**

Star LC System  
Method : OD\_30min\_1mL\_1%\_230nm  
User : User1

Acquired : 12/16/2019 5:09:25 PM  
Processed : 12/16/2019 5:55:34 PM  
Printed : 12/31/2019 12:59:13 PM

JCS-ELN46-0192(WHELK\_60MIN\_1ML\_1%)16.DATA - Prostar 325 Absorbance Channel 2 LC1006M831

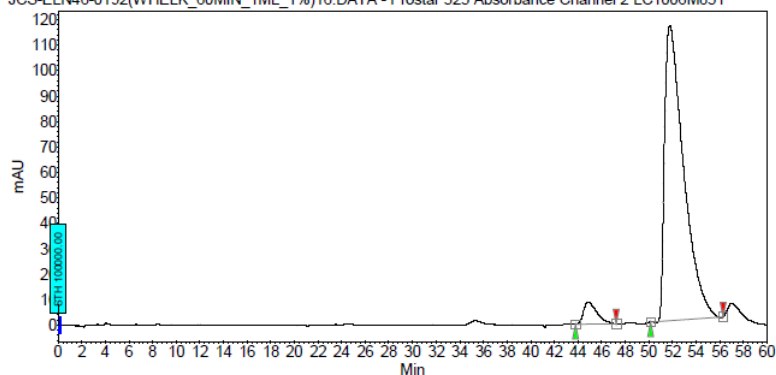

**Peak results :**

| Index | Name    | Time [Min] | Quantity [% Area] | Height [mAU] | Area [mAU.Min] | Area % [%] |
|-------|---------|------------|-------------------|--------------|----------------|------------|
| 1     | UNKNOWN | 44.88      | 5.04              | 8.7          | 11.5           | 5.037      |
| 2     | UNKNOWN | 51.77      | 94.86             | 115.9        | 216.7          | 94.963     |
| Total |         |            | 100.00            | 124.6        | 228.2          | 100.000    |

0 °C, 1.0 mol % Rh<sub>2</sub>(S-TPPTTL)<sub>4</sub> 1.5 equiv vinyl heterocycle, 3.5 equiv 2-chloropyridine, CH<sub>2</sub>Cl<sub>2</sub> as solvent, 10 equiv HFIP, reaction performed according to procedure 3.5

**Chromatogram :**

**JCS-ELN46-0198(WHELK\_60MIN\_1ML\_1%)3\_cha**

Star LC System  
Method : OD\_30min\_1mL\_1%\_230nm  
User : User1

Acquired : 12/20/2019 11:37:43 AM  
Processed : 9/23/2020 5:56:12 PM  
Printed : 9/23/2020 5:56:19 PM

JCS-ELN46-0198(WHELK\_60MIN\_1ML\_1%)3.DATA - Prostar 325 Absorbance Channel 2 LC1006M831

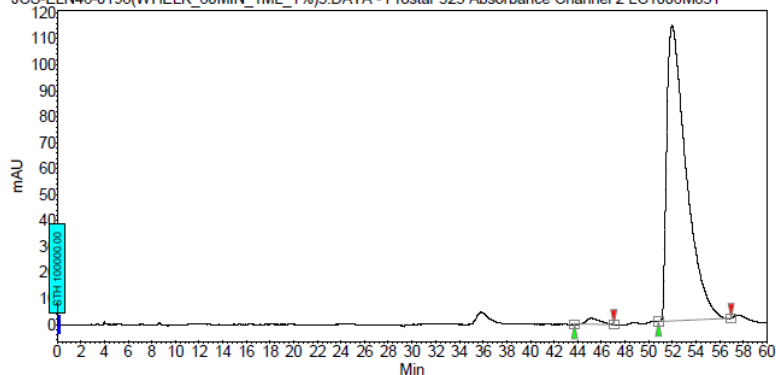

**Peak results :**

| Index | Name    | Time [Min] | Quantity [% Area] | Height [mAU] | Area [mAU.Min] | Area % [%] |
|-------|---------|------------|-------------------|--------------|----------------|------------|
| 1     | UNKNOWN | 45.17      | 1.43              | 2.4          | 3.1            | 1.434      |
| 2     | UNKNOWN | 51.97      | 98.57             | 114.0        | 216.4          | 98.566     |
| Total |         |            | 100.00            | 116.3        | 219.5          | 100.000    |

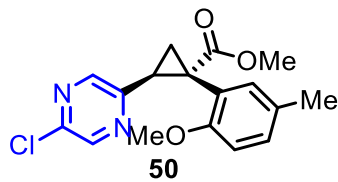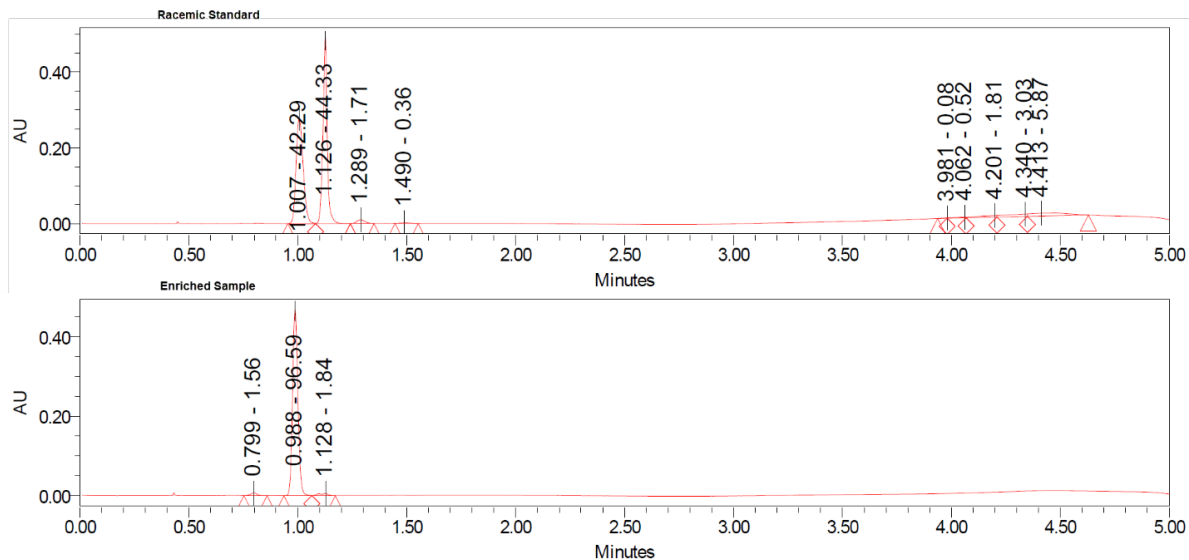

| Racemic Standard               | Enriched Sample                                 |
|--------------------------------|-------------------------------------------------|
| RT = 1.007 min<br>Area = 42.29 | RT <sub>major</sub> = 0.988 min<br>Area = 96.59 |
| RT = 1.126 min<br>Area = 44.33 | RT <sub>minor</sub> = 1.128 min<br>Area = 1.84  |

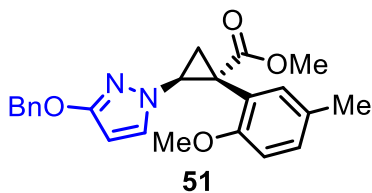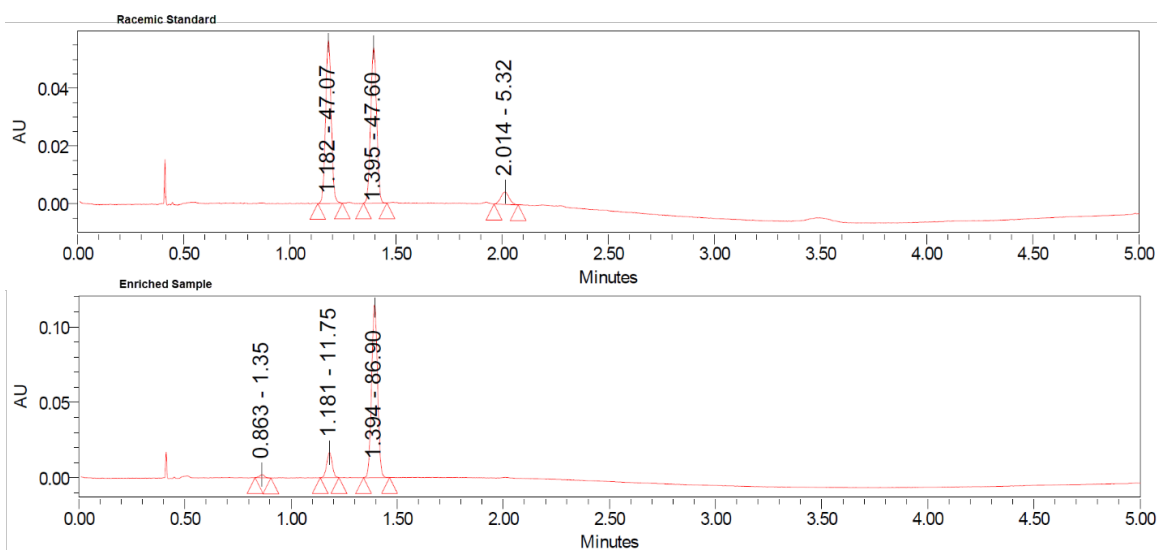

| Racemic Standard               | Enriched Sample                                 |
|--------------------------------|-------------------------------------------------|
| RT = 1.182 min<br>Area = 47.07 | RT <sub>minor</sub> = 1.181 min<br>Area = 11.75 |
| RT = 1.395 min<br>Area = 47.60 | RT <sub>major</sub> = 1.394 min<br>Area = 86.90 |

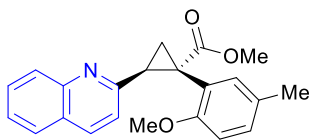

52

Racemic trace:

Chromatogram :

JCS-ELN46-0277conc(ADH\_1ML\_1%\_60MIN)44\_c

channel2  
Method : OJ\_30min\_1mL\_1%\_230NM  
User : User1

Acquired : 6/7/2020 4:59:26 AM  
Processed : 9/12/2020 9:43:51 AM  
Printed : 9/12/2020 9:43:58 AM

JCS-ELN46-0277conc(ADH\_1ML\_1%\_60MIN)44.DATA - Prostar 325 Absorbance Channel 2 LC1006M831

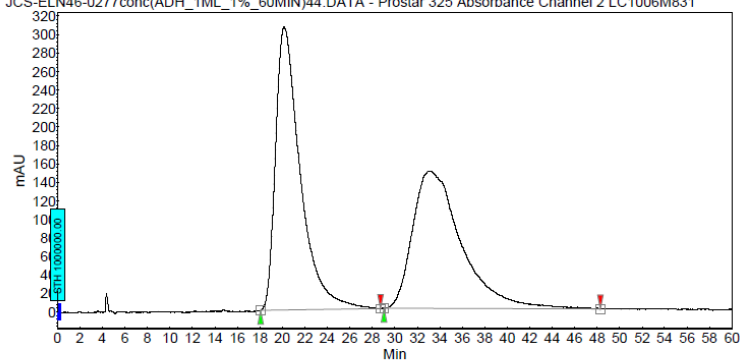

Peak results :

| Index | Name    | Time [Min] | Quantity [% Area] | Height [mAU] | Area [mAU Min] | Area % [%] |
|-------|---------|------------|-------------------|--------------|----------------|------------|
| 1     | UNKNOWN | 20.15      | 51.09             | 306.0        | 780.3          | 51.090     |
| 2     | UNKNOWN | 33.08      | 48.91             | 148.7        | 747.0          | 48.910     |
| Total |         |            | 100.00            | 454.7        | 1527.2         | 100.000    |

0 °C, 1.0 mol % Rh<sub>2</sub>(S-TPPTTL)<sub>4</sub> 1.5 equiv vinyl heterocycle, 3.5 equiv 2-chloropyridine, CH<sub>2</sub>Cl<sub>2</sub> as solvent, reaction performed according to procedure 3.4

Chromatogram :

JCS-ELN46-0278conc(ADH\_1ml\_1%\_60min)5\_ch

Method : OJ\_30min\_1mL\_1%\_230NM  
User : User1

Acquired : 6/9/2020 6:17:52 PM  
Processed : 6/10/2020 4:48:38 PM  
Printed : 9/12/2020 9:40:49 AM

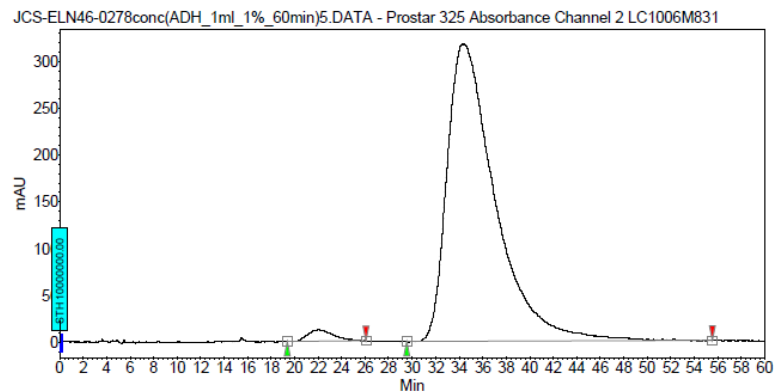

Peak results :

| Index | Name    | Time [Min] | Quantity [% Area] | Height [mAU] | Area [mAU.Min] | Area % [%] |
|-------|---------|------------|-------------------|--------------|----------------|------------|
| 1     | UNKNOWN | 22.04      | 2.03              | 12.5         | 31.3           | 2.034      |
| 2     | UNKNOWN | 34.36      | 97.97             | 317.8        | 1508.3         | 97.966     |
| Total |         |            | 100.00            | 330.3        | 1539.6         | 100.000    |

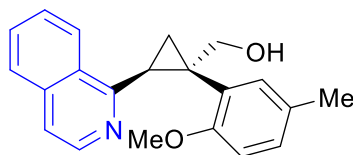

(53-reduced)

LAH reduction of **53** was required to achieve separation of the enantiomers by chiral UHPLC. See section 4.3 for experimental details.

Racemic trace of reduced product:

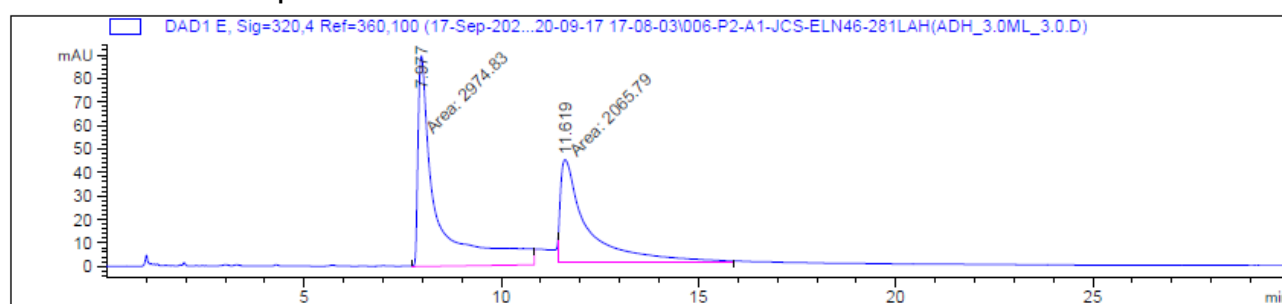

Signal 5: DAD1 E, Sig=320,4 Ref=360,100

| Peak # | RetTime [min] | Type | Width [min] | Area [mAU*s] | Height [mAU] | Area %  |
|--------|---------------|------|-------------|--------------|--------------|---------|
| 1      | 7.977         | MM   | 0.5532      | 2974.82690   | 89.62110     | 59.0172 |
| 2      | 11.619        | MM   | 0.7913      | 2065.78540   | 43.50774     | 40.9828 |

Totals : 5040.61230 133.12885

0 °C, 1.0 mol % Rh<sub>2</sub>(S-TPPTTL)<sub>4</sub> 1.5 equiv vinyl heterocycle, 3.5 equiv 2-chloropyridine, CH<sub>2</sub>Cl<sub>2</sub> as solvent, reaction performed according to procedure 3.4 prior to LAH reduction.

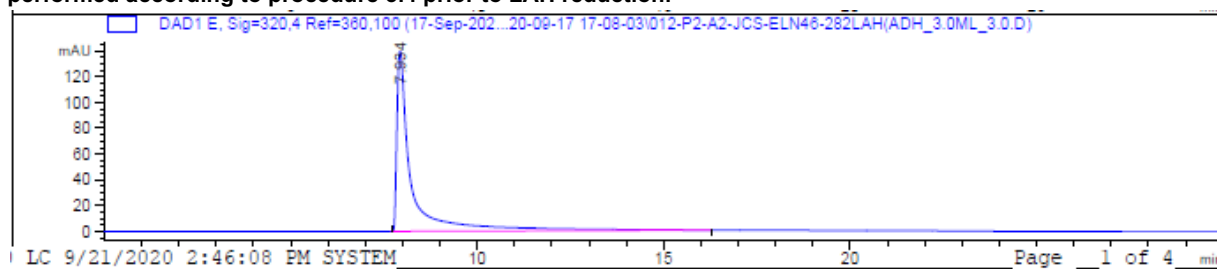

Signal 5: DAD1 E, Sig=320,4 Ref=360,100

| Peak # | RetTime [min] | Type | Width [min] | Area [mAU*s] | Height [mAU] | Area %   |
|--------|---------------|------|-------------|--------------|--------------|----------|
| 1      | 7.934         | BB   | 0.3805      | 3865.99292   | 139.85376    | 100.0000 |

Totals : 3865.99292 139.85376

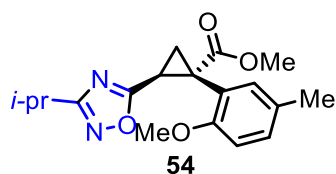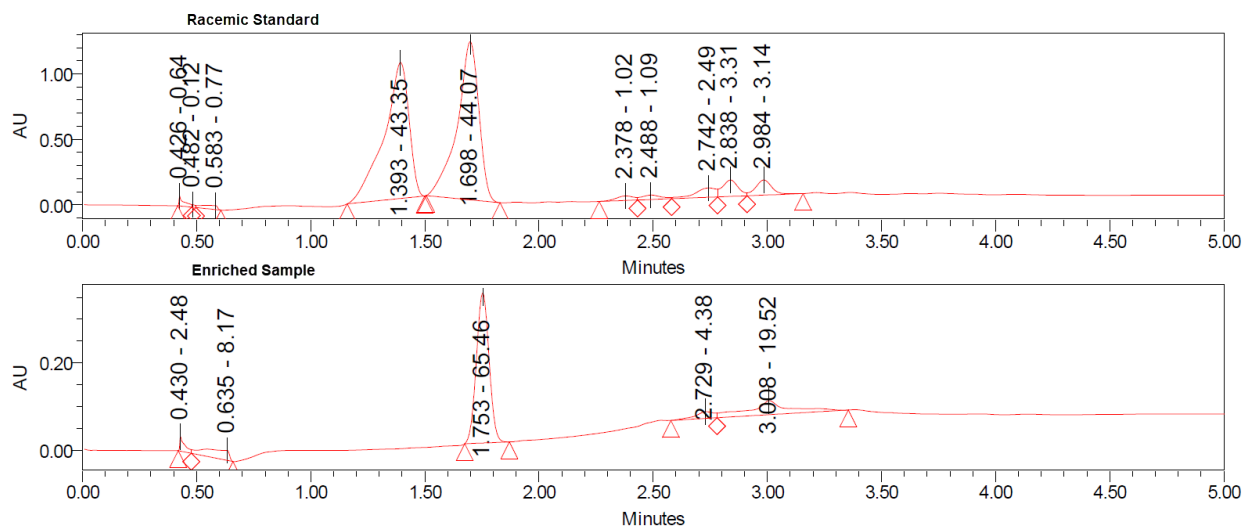

| Racemic Standard               | Enriched Sample                                 |
|--------------------------------|-------------------------------------------------|
| RT = 1.393 min<br>Area = 43.35 | RT <sub>minor</sub> = n.d.<br>Area = n.d.       |
| RT = 1.698 min<br>Area = 44.07 | RT <sub>major</sub> = 1.753 min<br>Area = 65.46 |

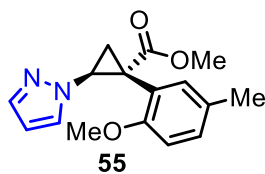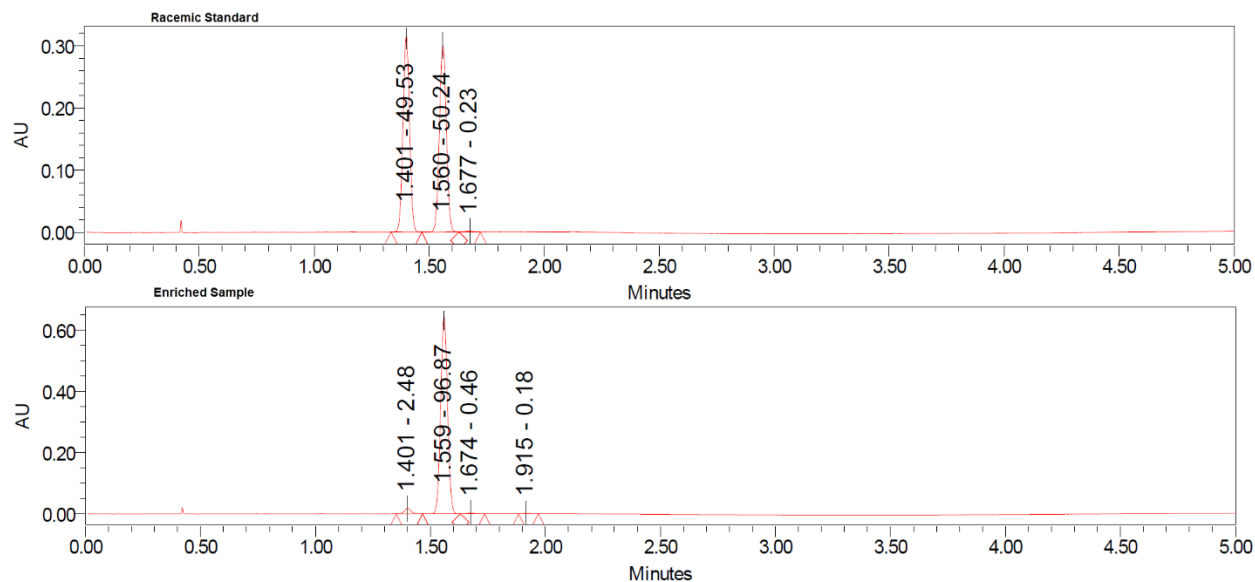

| Racemic Standard               | Enriched Sample                                 |
|--------------------------------|-------------------------------------------------|
| RT = 1.401 min<br>Area = 49.53 | RT <sub>minor</sub> = 1.401 min<br>Area = 2.48  |
| RT = 1.560 min<br>Area = 50.24 | RT <sub>major</sub> = 1.559 min<br>Area = 96.87 |

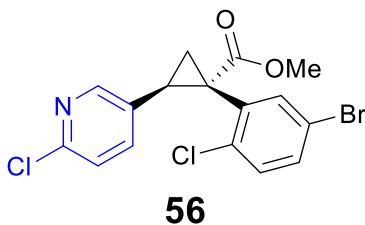

**Racemic trace:**

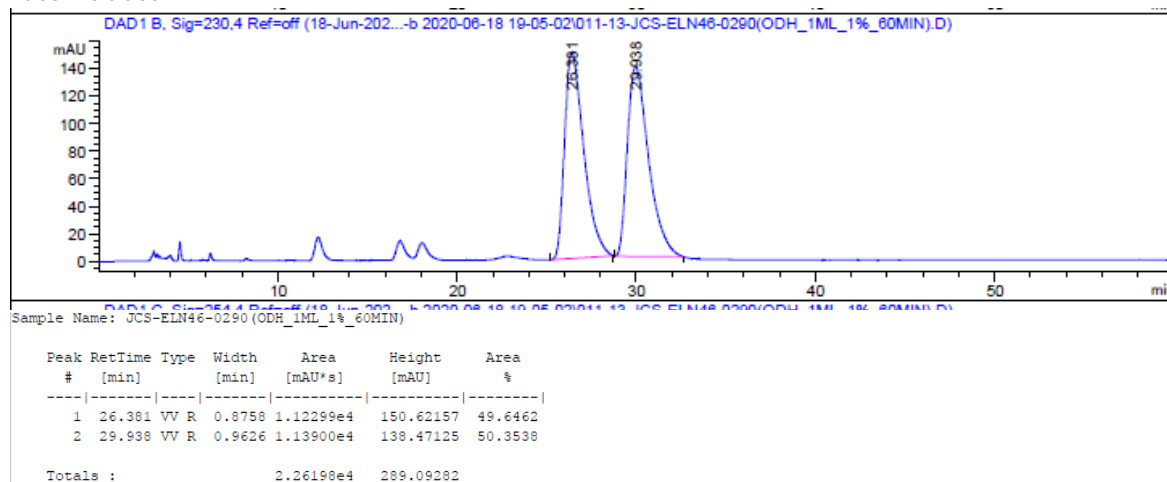

0 °C, 1.0 mol % Rh<sub>2</sub>(S-TPPTTL)<sub>4</sub> 1.5 equiv vinyl heterocycle, 3.5 equiv 2-chloropyridine, CH<sub>2</sub>Cl<sub>2</sub> as solvent, reaction performed according to procedure 3.4

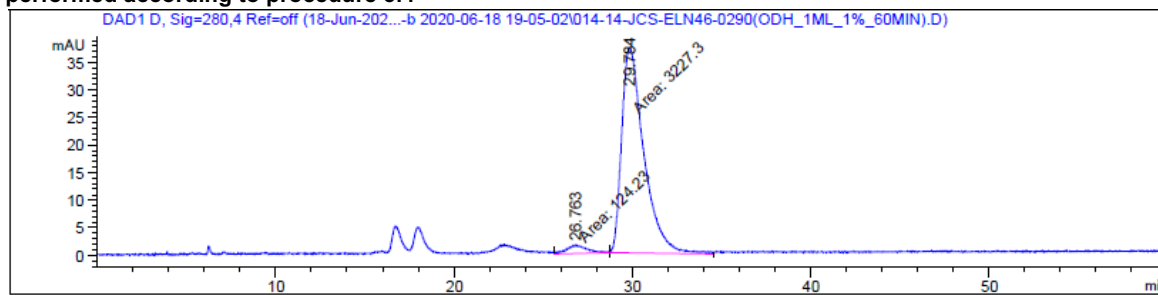

| Peak # | RetTime [min] | Type | Width [min] | Area [mAU*s] | Height [mAU] | Area %  |
|--------|---------------|------|-------------|--------------|--------------|---------|
| 1      | 26.763        | MM   | 1.3216      | 124.23034    | 1.56664      | 3.7067  |
| 2      | 29.784        | MM   | 1.4409      | 3227.30420   | 37.33059     | 96.2933 |

Totals : 3351.53454 38.89723

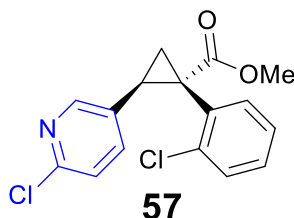

Racemic Trace:

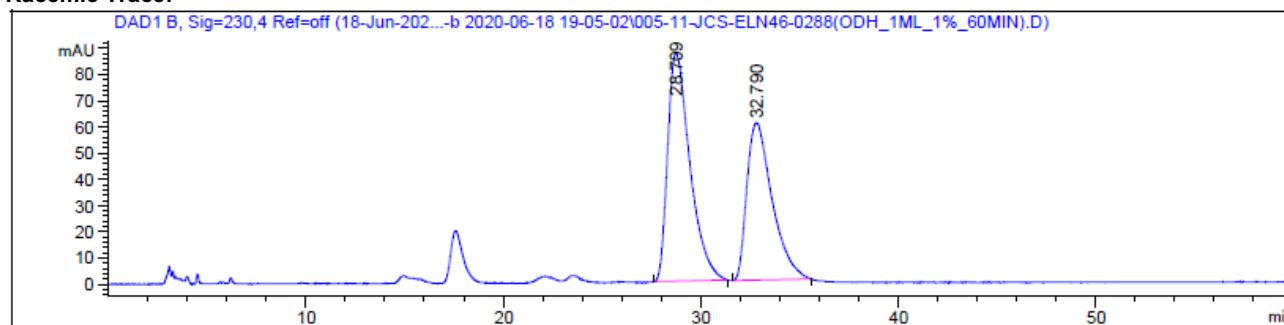

| Peak # | RetTime [min] | Type | Width [min] | Area [mAU*s] | Height [mAU] | Area %  |
|--------|---------------|------|-------------|--------------|--------------|---------|
| 1      | 28.709        | VV R | 0.9181      | 6819.27051   | 86.98462     | 56.0344 |
| 2      | 32.790        | VV R | 1.0426      | 5350.51172   | 60.01482     | 43.9656 |

Totals : 1.21698e4 146.99944

0 °C, 1.0 mol % Rh<sub>2</sub>(S-TPPTTL)<sub>4</sub>, 1.5 equiv vinyl heterocycle, 3.5 equiv 2-chloropyridine, CH<sub>2</sub>Cl<sub>2</sub> as solvent, reaction performed according to procedure 3.4

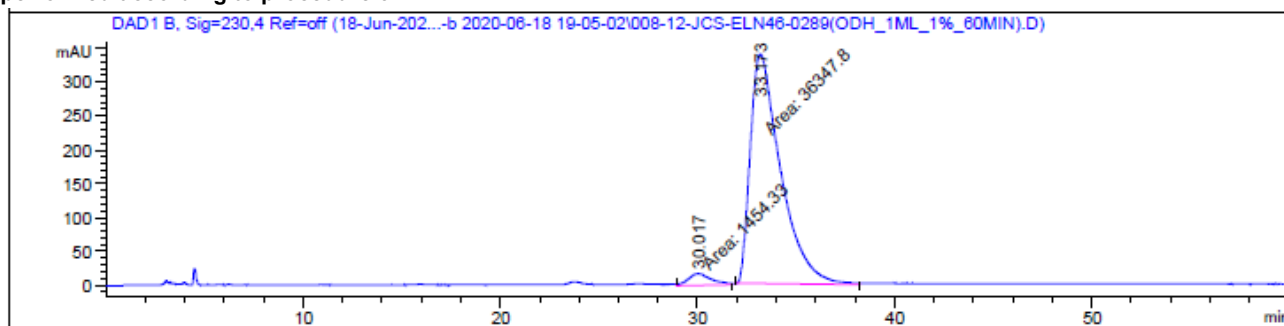

Signal 2: DAD1 B, Sig=230,4 Ref=off

| Peak # | RetTime [min] | Type | Width [min] | Area [mAU*s] | Height [mAU] | Area %  |
|--------|---------------|------|-------------|--------------|--------------|---------|
| 1      | 30.017        | MM   | 1.3712      | 1454.32605   | 17.67680     | 3.8472  |
| 2      | 33.173        | MM   | 1.7882      | 3.63478e4    | 338.76584    | 96.1528 |

Totals : 3.78022e4 356.44263

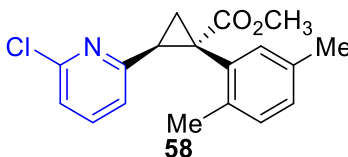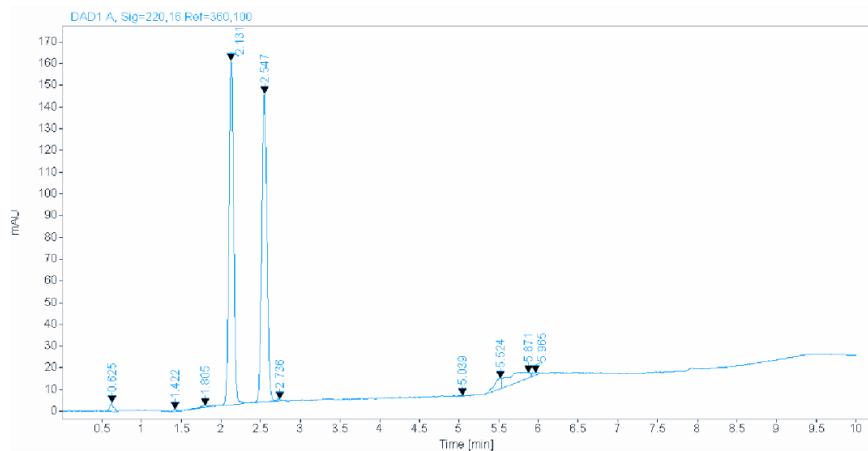

Racemic Standard

RT = 2.13 min

Area = 647.6

RT = 2.55 min

Area = 646.9

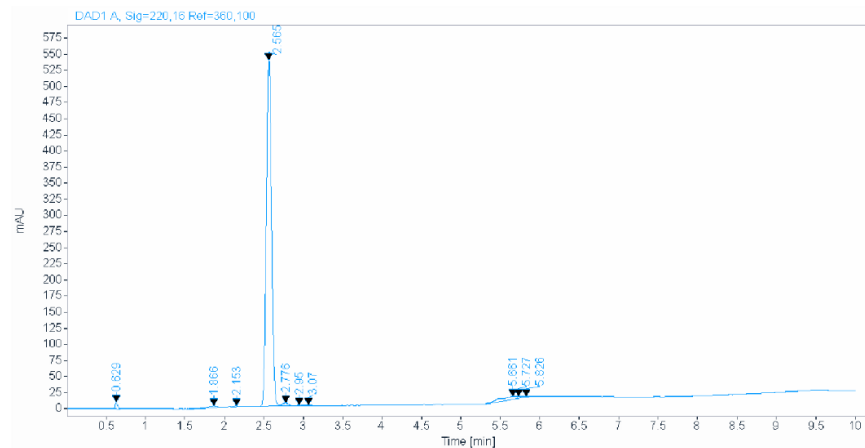

Enriched Sample

RT<sub>minor</sub> = 2.15 min

Area = 5.4

RT<sub>major</sub> = 2.57 min

Area = 2451.9

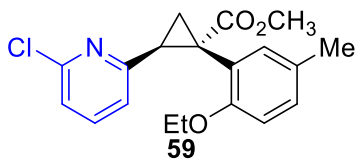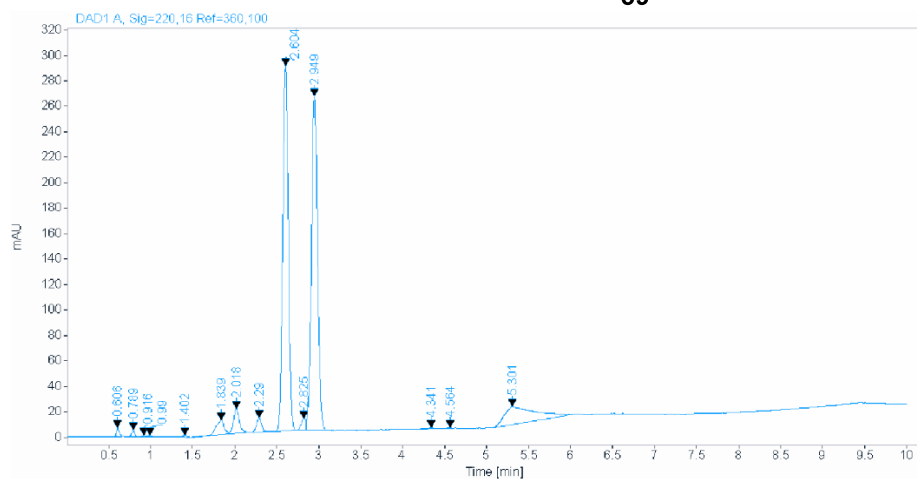

**Racemic Standard**

RT = 2.60 min

Area = 1318.7

RT = 2.95 min

Area = 1334.2

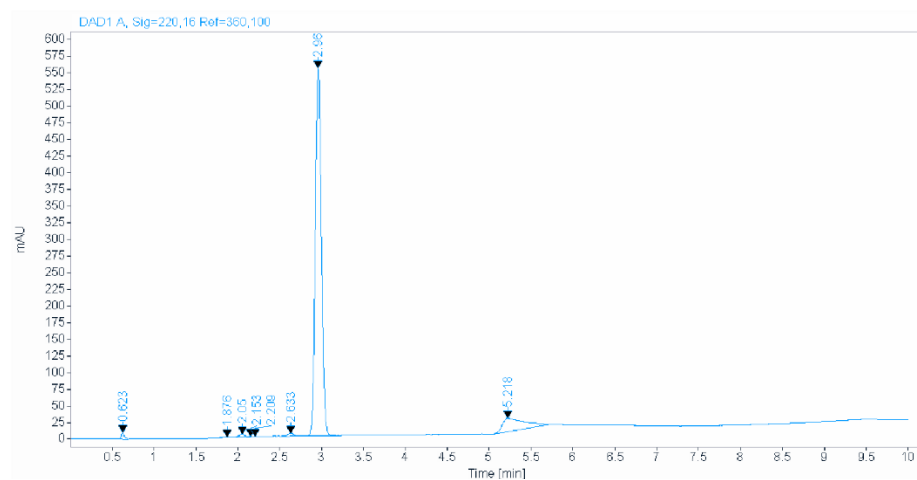

**Enriched Sample**

RT<sub>minor</sub> = 2.63 min

Area = 19.7

RT<sub>major</sub> = 2.96 min

Area = 2782.0

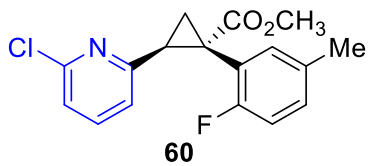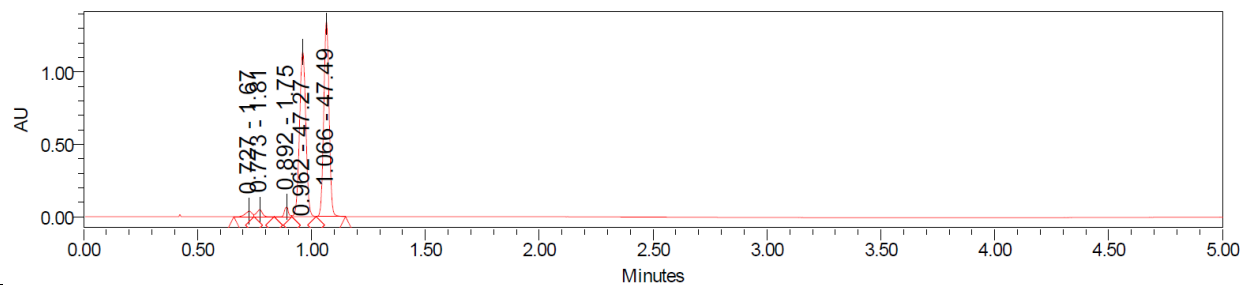

| Racemic Standard              |
|-------------------------------|
| RT = 0.96 min<br>Area = 47.27 |
| RT = 1.07 min<br>Area = 47.49 |

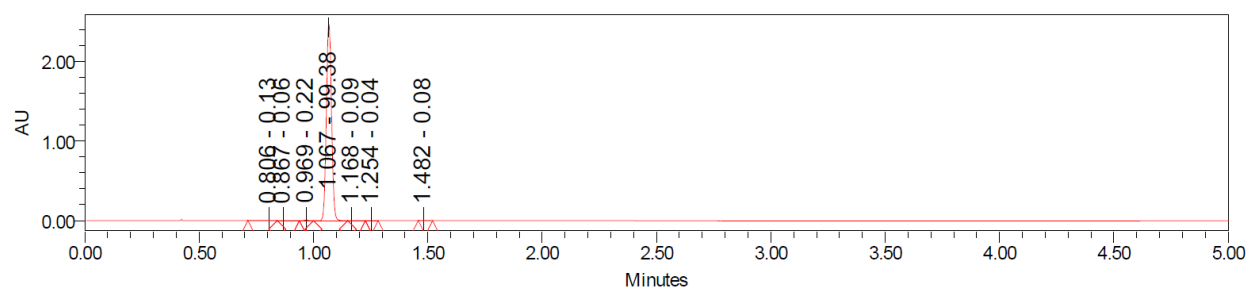

| Enriched Sample                                |
|------------------------------------------------|
| RT <sub>minor</sub> = 0.97 min<br>Area = 0.22  |
| RT <sub>major</sub> = 1.07 min<br>Area = 99.38 |

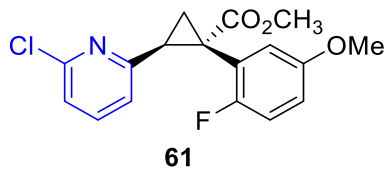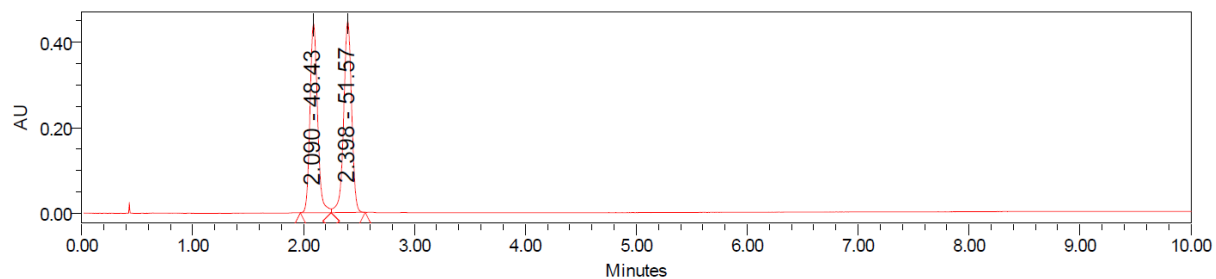

**Racemic Standard**

RT = 2.09 min

Area = 48.43

RT = 2.40 min

Area = 51.57

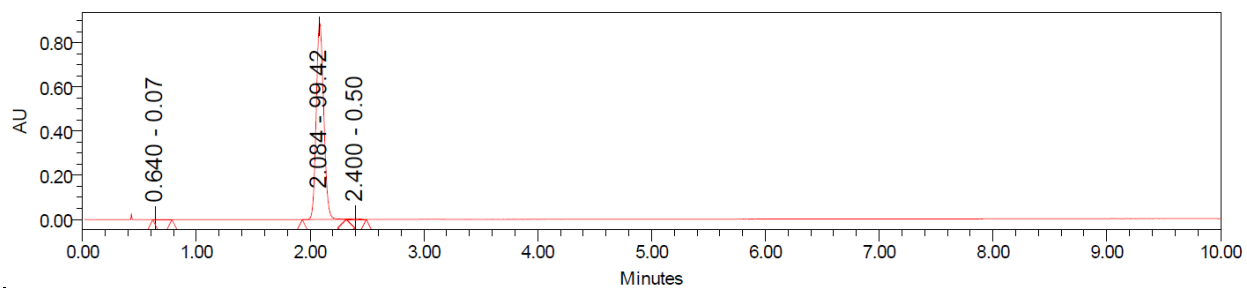

**Enriched Sample**

RT<sub>major</sub> = 2.08 min

Area = 99.42

RT<sub>minor</sub> = 2.40 min

Area = 0.50

Racemic trace:

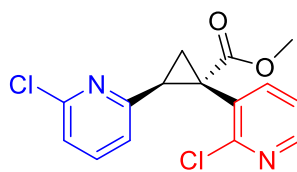

62

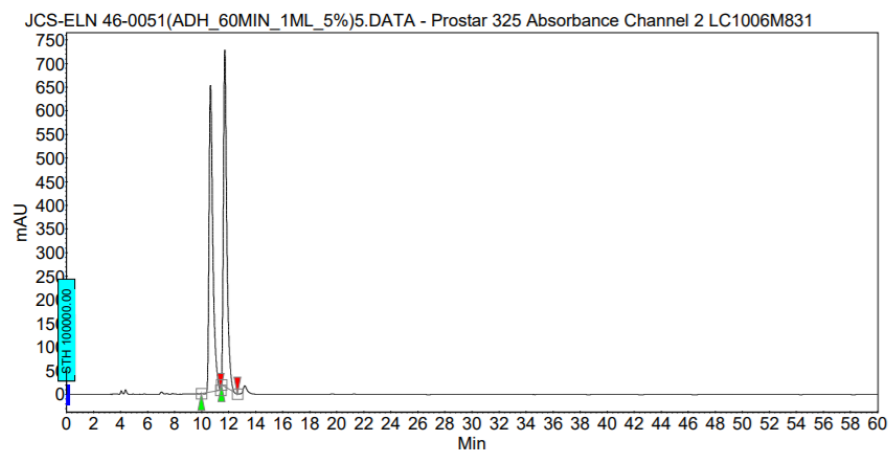

Peak results :

| Index | Name    | Time [Min] | Quantity [% Area] | Height [mAU] | Area [mAU.Min] | Area % [%] |
|-------|---------|------------|-------------------|--------------|----------------|------------|
| 1     | UNKNOWN | 10.65      | 50.25             | 649.3        | 210.6          | 50.254     |
| 2     | UNKNOWN | 11.71      | 49.75             | 712.3        | 208.5          | 49.746     |
| Total |         |            | 100.00            | 1361.7       | 419.1          | 100.000    |

0 °C, 1.0 mol %  $\text{Rh}_2(\text{S-TPPTTL})_4$  1.5 equiv vinyl heterocycle, 3.5 equiv 2-chloropyridine,  $\text{CH}_2\text{Cl}_2$  as solvent, reaction performed according to procedure 3.4

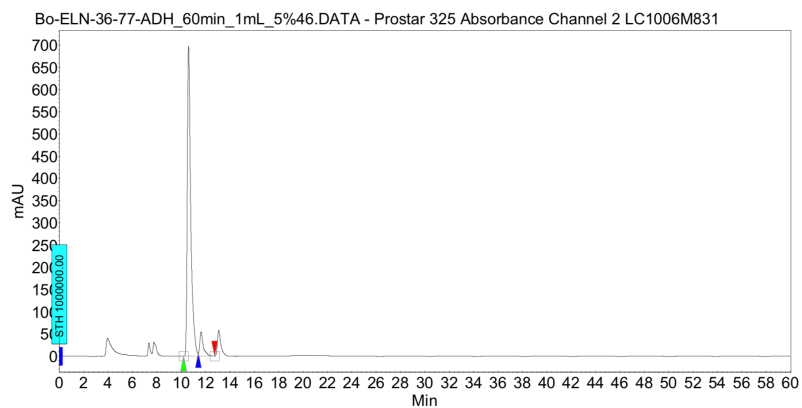

Peak results :

| Index | Name    | Time [Min] | Quantity [% Area] | Height [mAU] | Area [mAU.Min] | Area % [%] |
|-------|---------|------------|-------------------|--------------|----------------|------------|
| 1     | UNKNOWN | 10.60      | 92.62             | 698.2        | 230.9          | 92.622     |
| 2     | UNKNOWN | 11.63      | 7.38              | 54.6         | 18.4           | 7.378      |
| Total |         |            | 100.00            | 752.7        | 249.3          | 100.000    |

Racemic trace:

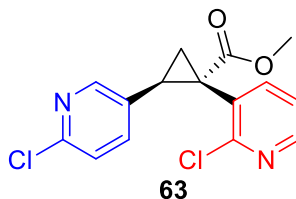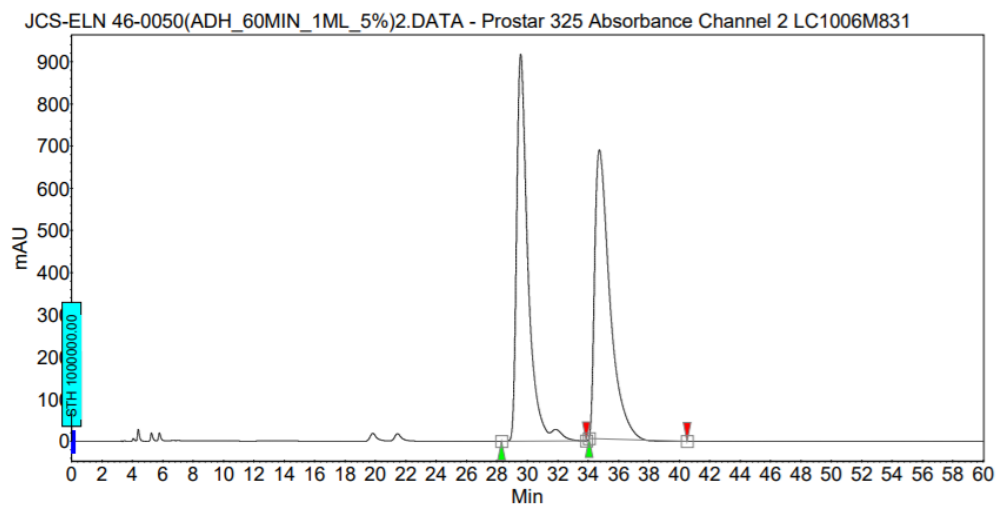

Peak results :

| Index | Name    | Time [Min] | Quantity [% Area] | Height [mAU] | Area [mAU.Min] | Area % [%] |
|-------|---------|------------|-------------------|--------------|----------------|------------|
| 1     | UNKNOWN | 29.56      | 50.43             | 917.3        | 801.0          | 50.427     |
| 2     | UNKNOWN | 34.74      | 49.57             | 684.2        | 787.4          | 49.573     |
| Total |         |            | 100.00            | 1601.4       | 1588.4         | 100.000    |

0 °C, 1.0 mol % Rh<sub>2</sub>(S-TPPTTL)<sub>4</sub>1.5 equiv vinyl heterocycle, 3.5 equiv 2-chloropyridine, CH<sub>2</sub>Cl<sub>2</sub> as solvent, reaction performed according to procedure 3.4

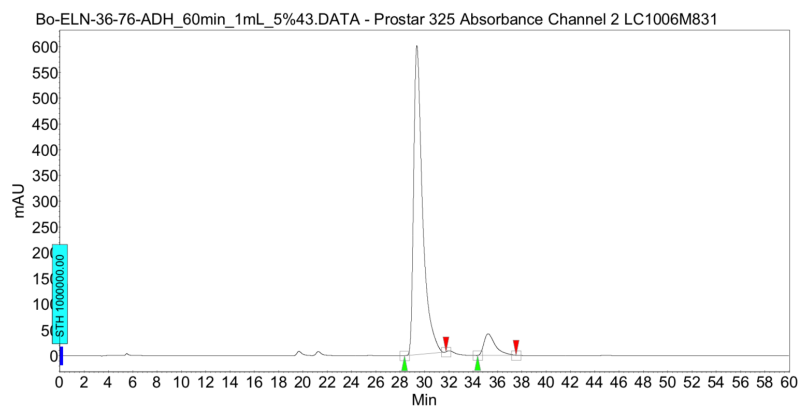

Peak results :

| Index | Name    | Time [Min] | Quantity [% Area] | Height [mAU] | Area [mAU.Min] | Area % [%] |
|-------|---------|------------|-------------------|--------------|----------------|------------|
| 2     | UNKNOWN | 29.37      | 91.81             | 599.4        | 508.8          | 91.813     |
| 1     | UNKNOWN | 35.23      | 8.19              | 41.9         | 45.4           | 8.187      |
| Total |         |            | 100.00            | 641.3        | 554.2          | 100.000    |

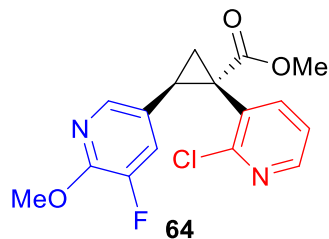

**Racemic trace:**

**Chromatogram :**  
**JCS-ELN46-202(ADH\_80MIN\_1ML\_1%)3\_channel1**

System : Prostar LC System  
 Method : DACHDNB\_30min\_1mL\_1%-230nm  
 User : User1

Acquired : 1/27/2020 9:42:16 AM  
 Processed : 1/30/2020 9:32:53 AM  
 Printed : 9/12/2020 12:07:06 PM

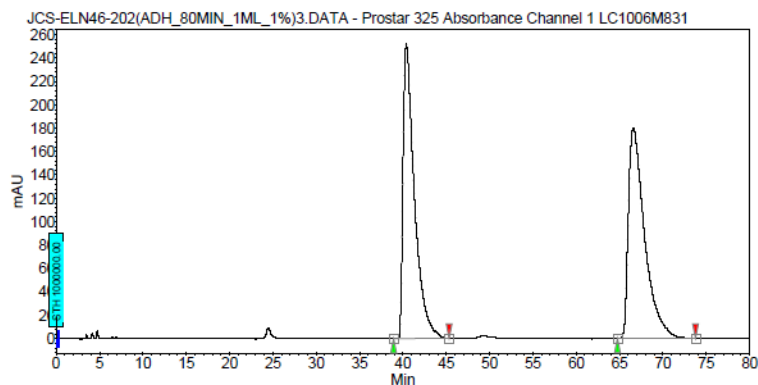

**Peak results :**

| Index | Name    | Time [Min] | Quantity [% Area] | Height [mAU] | Area [mAU.Min] | Area % [%] |
|-------|---------|------------|-------------------|--------------|----------------|------------|
| 1     | UNKNOWN | 40.39      | 49.63             | 252.0        | 384.1          | 49.626     |
| 2     | UNKNOWN | 66.59      | 50.37             | 180.0        | 389.9          | 50.374     |
| Total |         |            | 100.00            | 432.0        | 774.0          | 100.000    |

0 °C, 1.0 mol % Rh<sub>2</sub>(S-TPPTTL)<sub>4</sub> 1.5 equiv vinyl heterocycle, 3.5 equiv 2-chloropyridine, CH<sub>2</sub>Cl<sub>2</sub> as solvent, reaction performed according to procedure 3.4

**Chromatogram :**  
**JCS-ELN46-203(ADH\_80MIN\_1ML\_1%)6\_channel1**

System : Prostar LC System  
 Method : DACHDNB\_30min\_1mL\_1%-230nm  
 User : User1

Acquired : 1/27/2020 11:52:55 AM  
 Processed : 1/27/2020 1:22:55 PM  
 Printed : 9/12/2020 12:06:16 PM

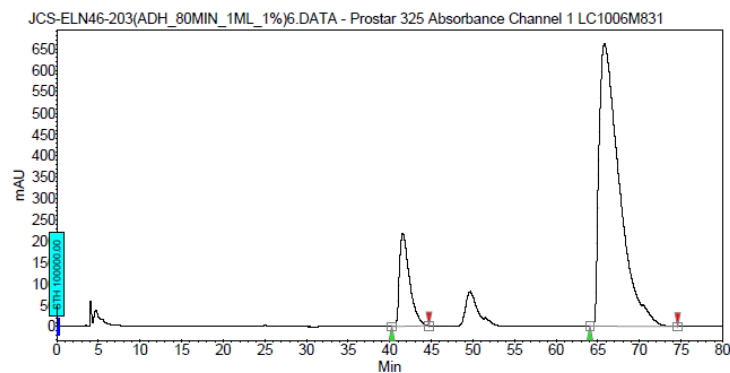

**Peak results :**

| Index | Name    | Time [Min] | Quantity [% Area] | Height [mAU] | Area [mAU.Min] | Area % [%] |
|-------|---------|------------|-------------------|--------------|----------------|------------|
| 1     | UNKNOWN | 41.57      | 14.09             | 218.8        | 306.3          | 14.062     |
| 2     | UNKNOWN | 65.80      | 85.91             | 661.4        | 1867.1         | 85.938     |
| Total |         |            | 100.00            | 880.2        | 2173.4         | 100.000    |

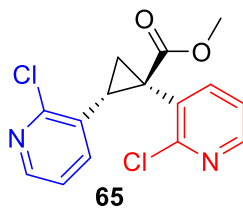

**Racemic trace:**

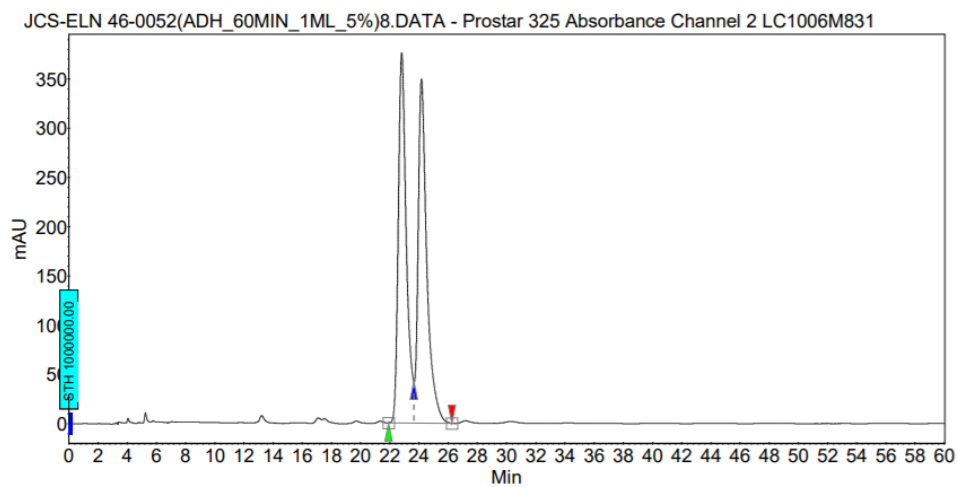

**Peak results :**

| Index | Name    | Time [Min] | Quantity [% Area] | Height [mAU] | Area [mAU.Min] | Area % [%] |
|-------|---------|------------|-------------------|--------------|----------------|------------|
| 1     | UNKNOWN | 22.81      | 49.64             | 375.9        | 239.1          | 49.641     |
| 2     | UNKNOWN | 24.16      | 50.36             | 349.3        | 242.6          | 50.359     |
| Total |         |            | 100.00            | 725.2        | 481.8          | 100.000    |

**0 °C, 1.0 mol % Rh<sub>2</sub>(S-TPPTTL)<sub>4</sub> 1.5 equiv vinyl heterocycle, 3.5 equiv 2-chloropyridine, CH<sub>2</sub>Cl<sub>2</sub> as solvent, reaction performed according to procedure 3.4**

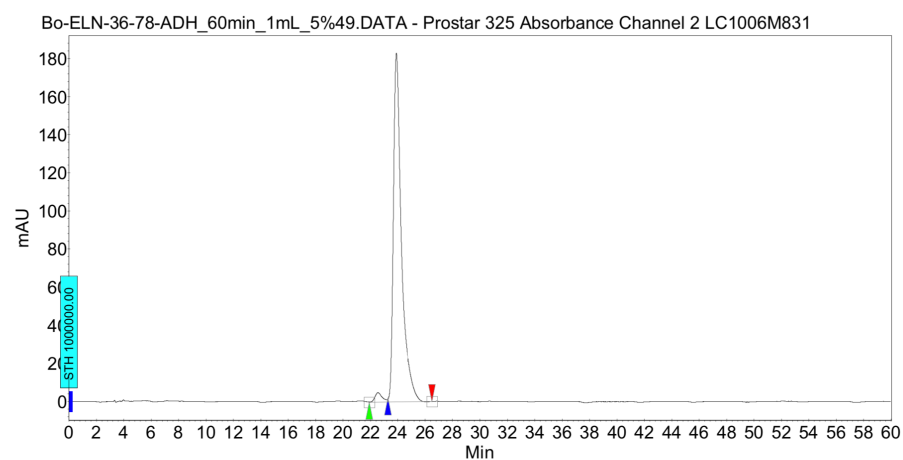

**Peak results :**

| Index | Name    | Time [Min] | Quantity [% Area] | Height [mAU] | Area [mAU.Min] | Area % [%] |
|-------|---------|------------|-------------------|--------------|----------------|------------|
| 1     | UNKNOWN | 22.54      | 2.40              | 4.9          | 3.1            | 2.396      |
| 2     | UNKNOWN | 23.89      | 97.60             | 183.1        | 124.9          | 97.604     |
| Total |         |            | 100.00            | 188.0        | 127.9          | 100.000    |

### 5.3: Screening of different coordinating additives for optimal %ee enhancement in cyclopropanation with *ortho*-substituted aryl/heteroaryl diazoacetates.

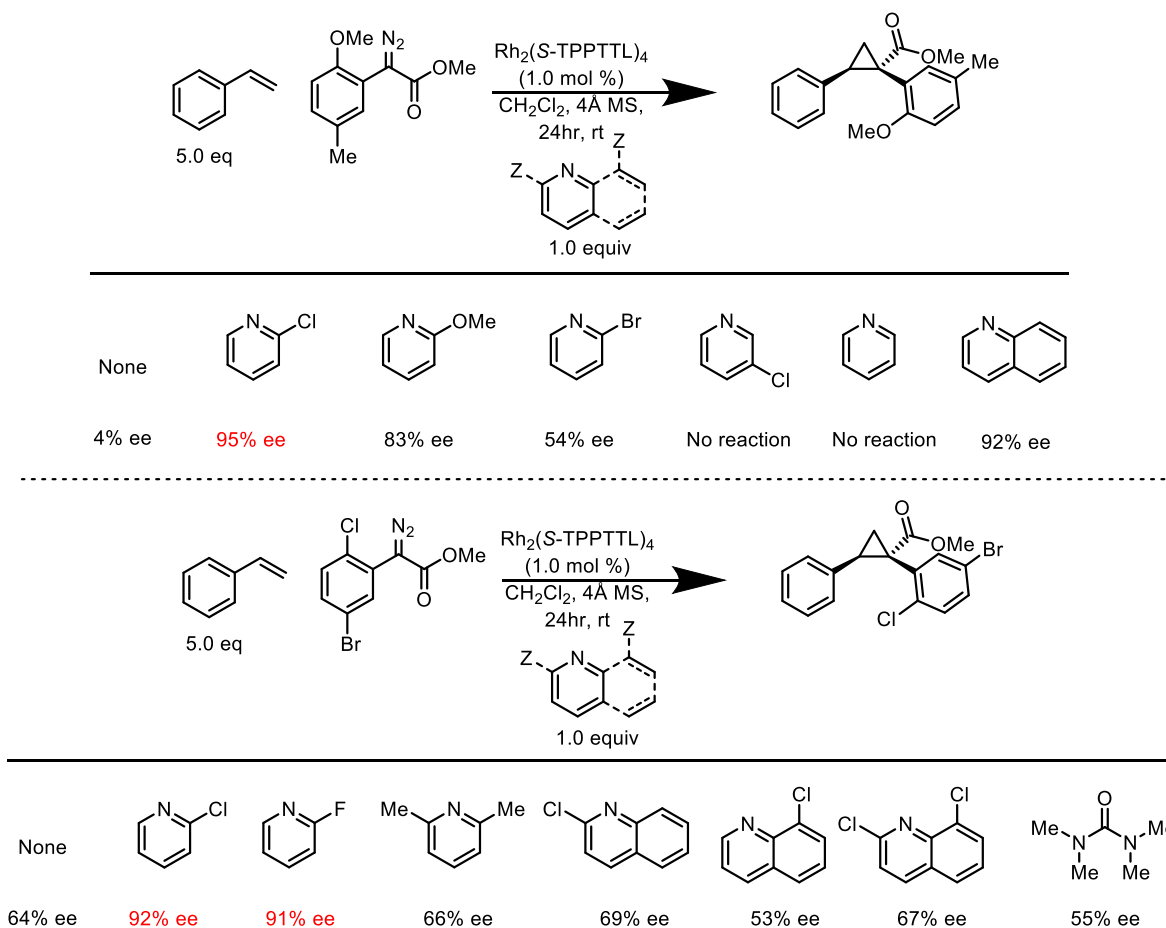

**Figure S5.** Examination of various coordinating additives to determine the optimal compound to enhance the enantioselectivity of cyclopropanation involving *ortho*-substituted aryl diazo acetates. Two aryldiazoacetates were examined to ensure generalizability. Reactions were conducted on 0.20 mmol scale with 5.0 equiv styrene, 1.0 equiv coordinating additive, 1.0 mol % catalyst loading, and  $\text{CH}_2\text{Cl}_2$  as solvent. The reaction was conducted at room temperature and run for at least 13 hr. Of the additives tested, 2-chloropyridine and 2-fluoropyridine (red) gave the best levels of enantio-enhancement. Other additives seemed to hamper the enantioselectivity of the reaction, in particular substituted quinolines and tetra-methyl urea. 3-Chloropyridine and pyridine served to poison the reaction, no rhodium-carbene was generated and the diazo-starting material was recovered.

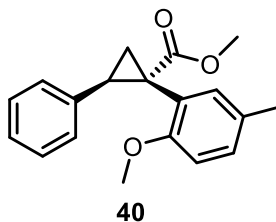

**Racemic trace, AD-H column:**

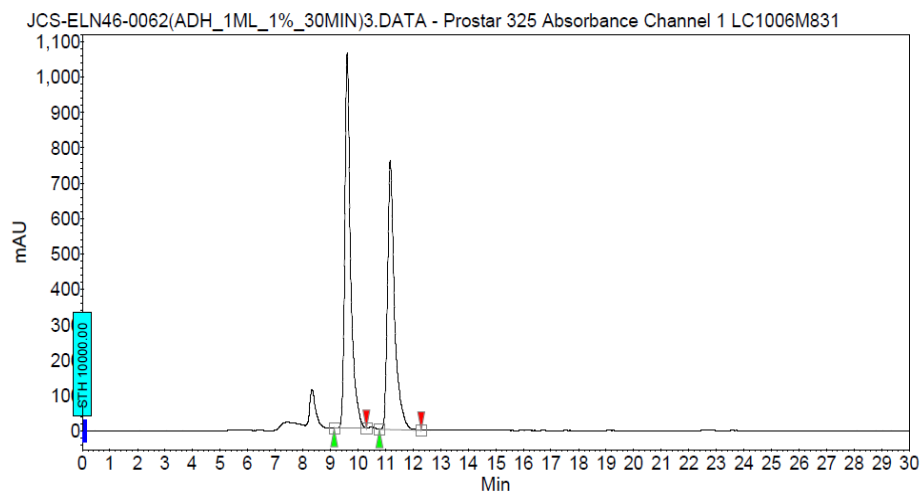

**Peak results :**

| Index | Name    | Time [Min] | Quantity [% Area] | Height [mAU] | Area [mAU.Min] | Area % [%] |
|-------|---------|------------|-------------------|--------------|----------------|------------|
| 1     | UNKNOWN | 9.61       | 53.67             | 1060.1       | 260.5          | 53.666     |
| 2     | UNKNOWN | 11.17      | 46.33             | 760.0        | 224.9          | 46.334     |
| Total |         |            | 100.00            | 1820.2       | 485.3          | 100.000    |

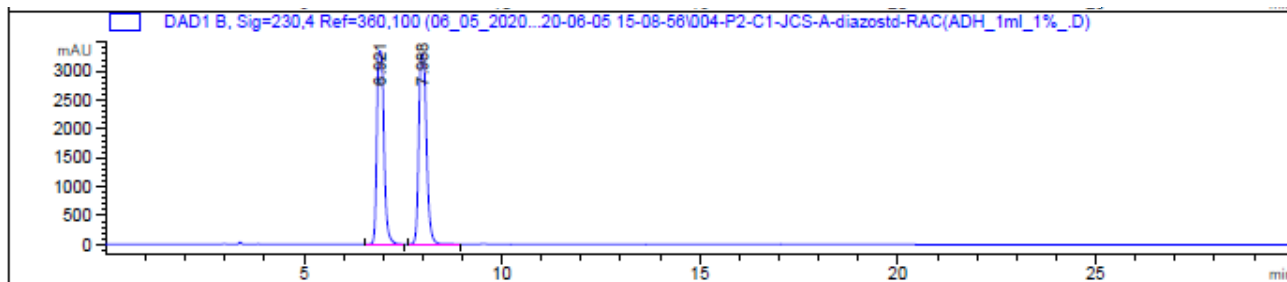

Signal 2: DAD1 B, Sig=230,4 Ref=360,100

| Peak # | RetTime [min] | Type | Width [min] | Area [mAU*s] | Height [mAU] | Area %  |
|--------|---------------|------|-------------|--------------|--------------|---------|
| 1      | 6.921         | BB   | 0.1986      | 4.20731e4    | 3348.93286   | 48.2033 |
| 2      | 7.988         | BV R | 0.2130      | 4.52095e4    | 3305.63135   | 51.7967 |

Totals : 8.72826e4 6654.56421

0 °C, 1.0 mol % Rh<sub>2</sub>(S-TPPTTL)<sub>4</sub>, 5.0 equiv styrene, 1.0 equiv 2-chloropyridine, CH<sub>2</sub>Cl<sub>2</sub> as solvent, reaction performed according to procedure 3.4

**Chromatogram :**  
**JCS-ELN46-0095DIL(ADH\_30MIN\_1ml\_1%)3\_cha**

Prostar LC System  
 Method: DACHDNB\_30min\_1ml\_1%-230nm  
 User: User1  
 Acquired: 10/17/2019 9:55:29 AM  
 Processed: 10/17/2019 10:44:45 AM  
 Printed: 12/31/2019 12:32:50 PM

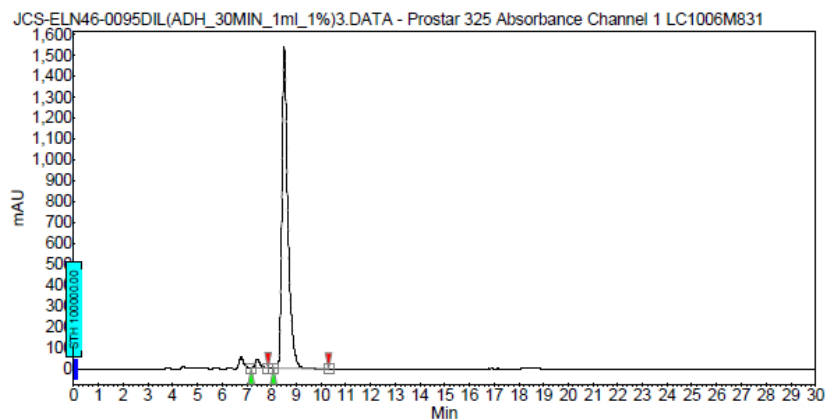

**Peak results :**

| Index | Name    | Time [Min] | Quantity [% Area] | Height [mAU] | Area [mAU.Min] | Area % [%] |
|-------|---------|------------|-------------------|--------------|----------------|------------|
| 2     | UNKNOWN | 7.41       | 2.41              | 44.3         | 10.6           | 2.413      |
| 1     | UNKNOWN | 8.52       | 97.59             | 1536.4       | 429.5          | 97.587     |
| Total |         |            | 100.00            | 1580.6       | 440.1          | 100.000    |

0 °C, 1.0 mol % Rh<sub>2</sub>(S-TPPTTL)<sub>4</sub>, 5.0 equiv styrene, 1.0 equiv 2-MeOpyridine, CH<sub>2</sub>Cl<sub>2</sub> as solvent, reaction performed according to procedure 3.4

Bo-ELN-0036-0059-ADH\_30min\_1mL\_1%21.CHA - Prostar 325 Absorbance Channel 1 LC1006M831

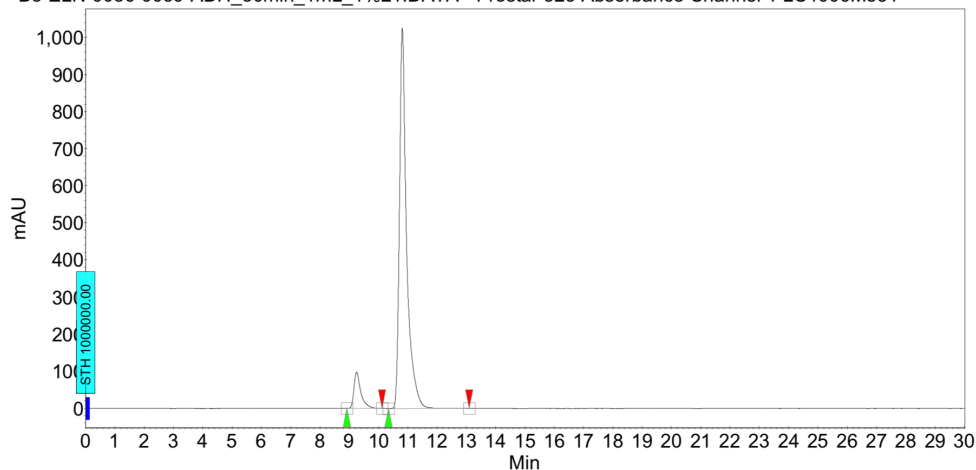

**Peak results :**

| Index | Name    | Time [Min] | Quantity [% Area] | Height [mAU] | Area [mAU.Min] | Area % [%] |
|-------|---------|------------|-------------------|--------------|----------------|------------|
| 2     | UNKNOWN | 9.25       | 8.27              | 97.7         | 26.3           | 8.274      |
| 1     | UNKNOWN | 10.81      | 91.73             | 1025.7       | 291.2          | 91.726     |
| Total |         |            | 100.00            | 1123.4       | 317.5          | 100.000    |

0 °C, 1.0 mol % Rh<sub>2</sub>(S-TPPTTL)<sub>4</sub>, 5.0 equiv styrene, 1.0 equiv 2-Brpyridine, CH<sub>2</sub>Cl<sub>2</sub> as solvent, reaction performed according to procedure 3.4

# Chromatogram :

JCS-ELN46-0100(ADH\_30MIN\_1ml\_1%)8\_channe

System : Prostar LC System  
Method : DACHDNB\_30min\_1mL\_1%-230nm  
User : User1

Acquired : 10/16/2019 7:22:07 PM  
Processed : 10/17/2019 8:59:27 AM  
Printed : 12/31/2019 12:34:44 PM

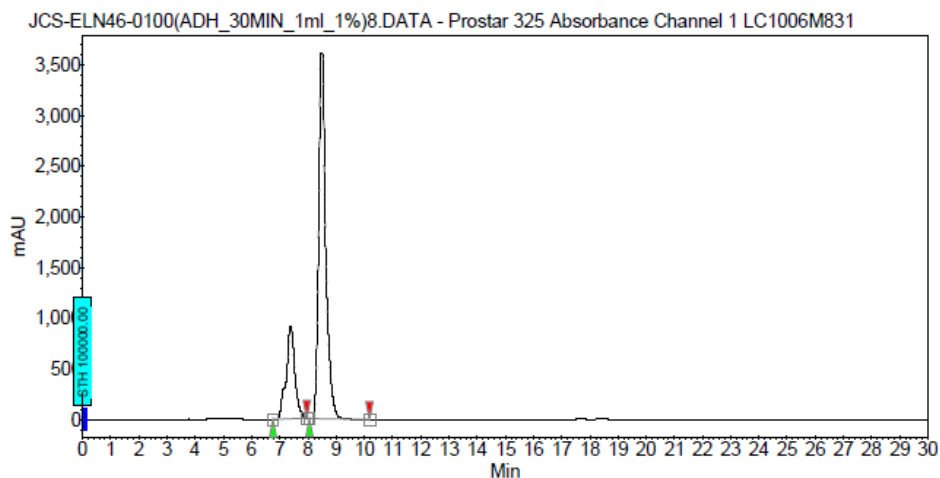

## Peak results :

| Index | Name    | Time [Min] | Quantity [% Area] | Height [mAU] | Area [mAU.Min] | Area % [%] |
|-------|---------|------------|-------------------|--------------|----------------|------------|
| 2     | UNKNOWN | 7.38       | 23.23             | 916.7        | 323.5          | 23.230     |
| 1     | UNKNOWN | 8.50       | 76.77             | 3610.0       | 1069.1         | 76.770     |
| Total |         |            | 100.00            | 4526.7       | 1392.6         | 100.000    |

0 °C, 1.0 mol % Rh<sub>2</sub>(S-TPPTTL)<sub>4</sub>, 5.0 equiv styrene, 1.0 equiv quinoline, CH<sub>2</sub>Cl<sub>2</sub> as solvent, reaction performed according to procedure 3.4

# Chromatogram :

JCS-ELN46-0102(ADH\_30MIN\_1ml\_1%)11\_chann

System : Prostar LC System  
Method : DACHDNB\_30min\_1mL\_1%-230nm  
User : User1

Acquired : 10/16/2019 8:39:23 PM  
Processed : 10/17/2019 8:58:20 AM  
Printed : 1/3/2020 11:11:40 AM

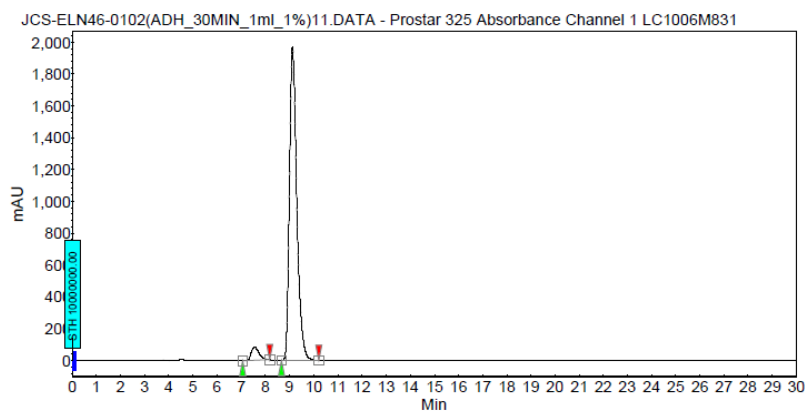

## Peak results :

| Index | Name    | Time [Min] | Quantity [% Area] | Height [mAU] | Area [mAU.Min] | Area % [%] |
|-------|---------|------------|-------------------|--------------|----------------|------------|
| 1     | UNKNOWN | 7.54       | 4.24              | 81.7         | 30.5           | 4.245      |
| 2     | UNKNOWN | 9.12       | 95.76             | 1966.1       | 687.8          | 95.755     |
| Total |         |            | 100.00            | 2047.8       | 718.3          | 100.000    |

Racemic trace:

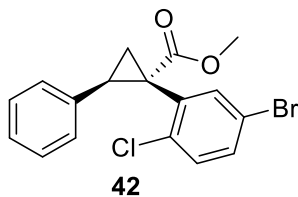

Chromatogram :  
JCS-ELN46-0080(OJH\_1ML\_1%\_30MIN)11\_chann

Method : Prostar LC System

Method : OD\_30min\_1mL\_1%\_210\_230nm

User : User1

Acquired : 10/8/2019 4:32:30 PM

Processed : 10/8/2019 5:19:04 PM

Printed : 12/31/2019 12:44:41 PM

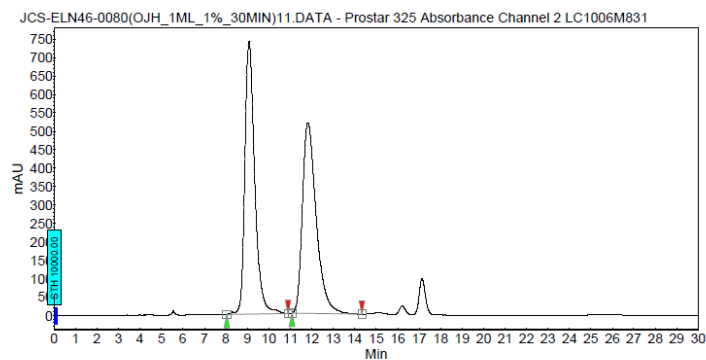

Peak results :

| Index | Name    | Time [Min] | Quantity [% Area] | Height [mAU] | Area [mAU.Min] | Area % [%] |
|-------|---------|------------|-------------------|--------------|----------------|------------|
| 1     | UNKNOWN | 9.07       | 50.51             | 739.1        | 394.0          | 50.510     |
| 2     | UNKNOWN | 11.82      | 49.49             | 516.8        | 386.0          | 49.490     |
| Total |         |            | 100.00            | 1255.9       | 780.0          | 100.000    |

0 °C, 1.0 mol % Rh<sub>2</sub>(S-TPPTTL)<sub>4</sub>, 5.0 equiv styrene, 1.0 equiv 2-Clpyridine, CH<sub>2</sub>Cl<sub>2</sub> as solvent, reaction performed according to procedure 3.4

Chromatogram :  
JCS-ELN46-0079DIL(OJH\_30MIN\_1ML\_1%)3\_cha

Method : Prostar LC System

Method : OD\_30min\_1mL\_1%\_230nm

User : User1

Acquired : 10/9/2019 9:44:19 AM

Processed : 12/31/2019 12:43:26 PM

Printed : 12/31/2019 12:43:28 PM

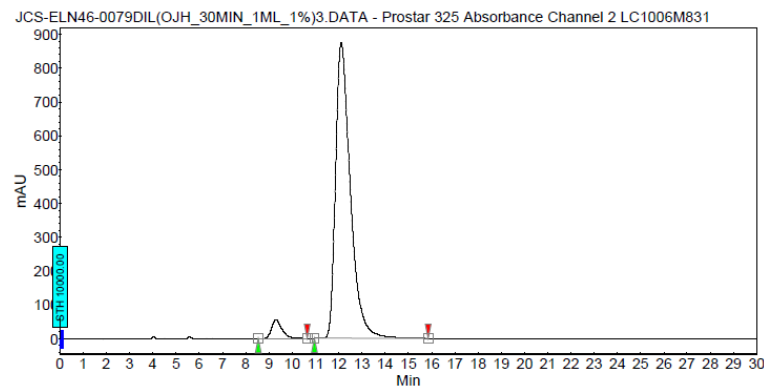

Peak results :

| Index | Name    | Time [Min] | Quantity [% Area] | Height [mAU] | Area [mAU.Min] | Area % [%] |
|-------|---------|------------|-------------------|--------------|----------------|------------|
| 1     | UNKNOWN | 9.30       | 4.30              | 55.7         | 29.0           | 4.303      |
| 2     | UNKNOWN | 12.11      | 95.70             | 872.6        | 643.9          | 95.697     |
| Total |         |            | 100.00            | 928.3        | 672.8          | 100.000    |

0 °C, 1.0 mol % Rh<sub>2</sub>(S-TPPTTL)<sub>4</sub>, 5.0 equiv styrene, 1.0 equiv 2-Clquinoline, CH<sub>2</sub>Cl<sub>2</sub> as solvent, reaction performed according to procedure 3.4

# Chromatogram :

JCS-ELN46-0115RE(OJH\_30MIN\_1ML\_1%)23\_ch

Method: S4900\_30min\_1mL\_1%\_230nm  
User: User1

Acquired : 11/10/2019 12:14:54 AM  
Processed : 9/29/2020 4:40:17 PM  
Printed : 9/29/2020 4:40:29 PM

JCS-ELN46-0115RE(OJH\_30MIN\_1ML\_1%)23.D - Prostar 325 Absorbance Channel 2 LC1006M831

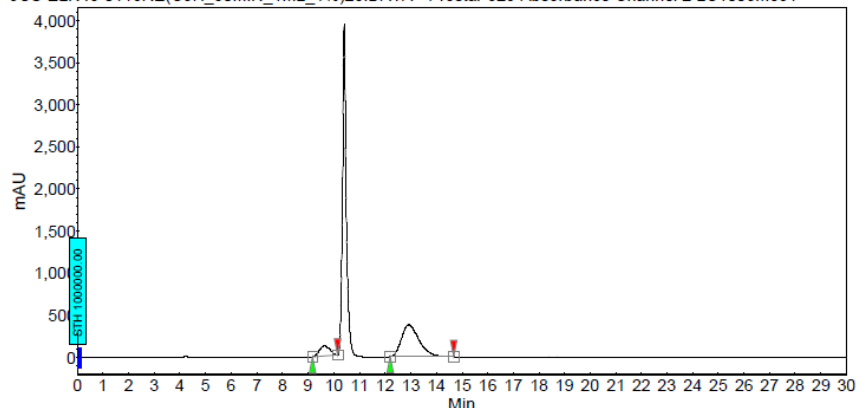

## Peak results :

| Index | Name    | Time [Min] | Quantity [% Area] | Height [mAU] | Area [mAU.Min] | Area % [%] |
|-------|---------|------------|-------------------|--------------|----------------|------------|
| 1     | UNKNOWN | 9.62       | 15.41             | 120.3        | 55.1           | 15.411     |
| 2     | UNKNOWN | 12.92      | 84.59             | 379.7        | 302.3          | 84.589     |
| Total |         |            | 100.00            | 500.0        | 357.4          | 100.000    |

0 °C, 1.0 mol % Rh<sub>2</sub>(S-TPPTTL)<sub>4</sub>, 5.0 equiv styrene, 1.0 equiv 2,8-dichloroquinoline, CH<sub>2</sub>Cl<sub>2</sub> as solvent, reaction performed according to procedure 3.4

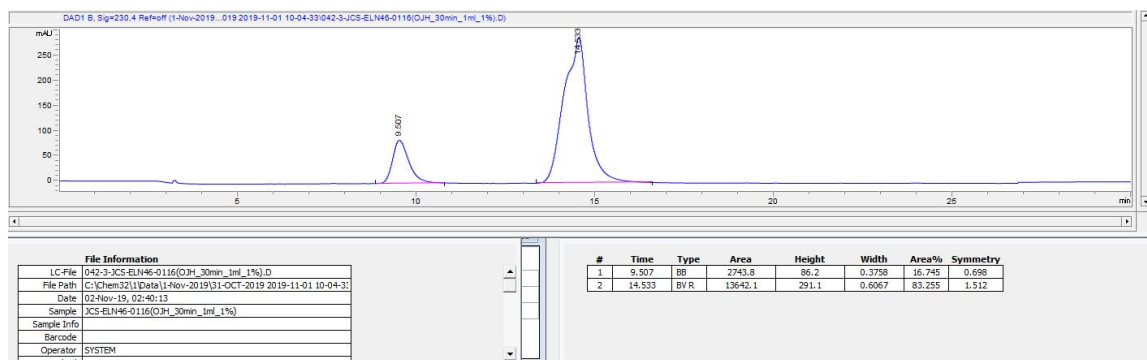

0 °C, 1.0 mol % Rh<sub>2</sub>(S-TPPTTL)<sub>4</sub>, 5.0 equiv styrene, 1.0 equiv 8-chloroquinoline, CH<sub>2</sub>Cl<sub>2</sub> as solvent, reaction performed according to procedure 3.4

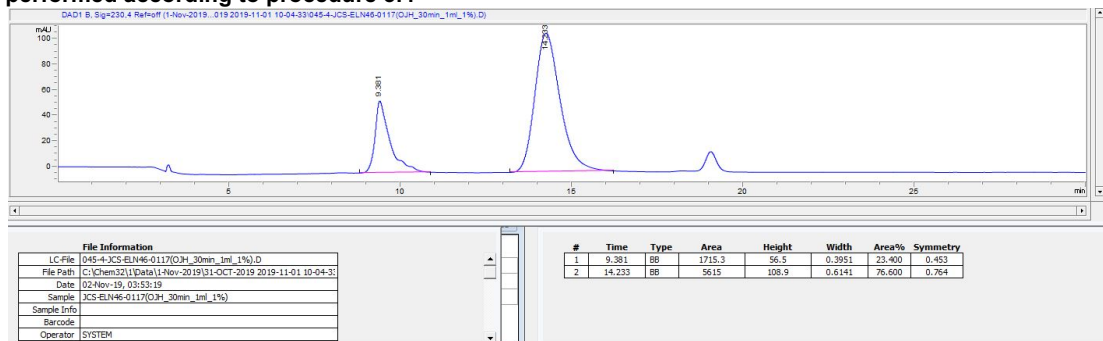

0 °C, 1.0 mol % Rh<sub>2</sub>(S-TPPTTL)<sub>4</sub>, 5.0 equiv styrene, 1.0 equiv 2-Fpyridine, CH<sub>2</sub>Cl<sub>2</sub> as solvent, reaction performed according to procedure 3.4

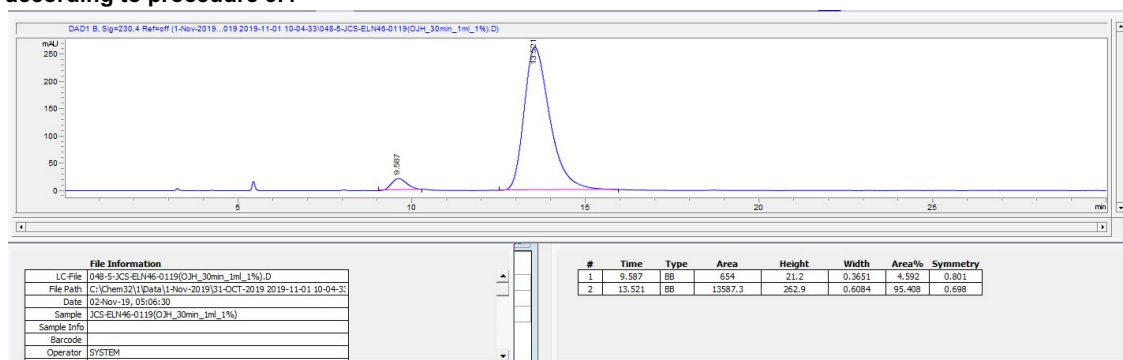

0 °C, 1.0 mol % Rh<sub>2</sub>(S-TPPTTL)<sub>4</sub>, 5.0 equiv styrene, 1.0 equiv 2,6-lutidine, CH<sub>2</sub>Cl<sub>2</sub> as solvent, reaction performed according to procedure 3.4

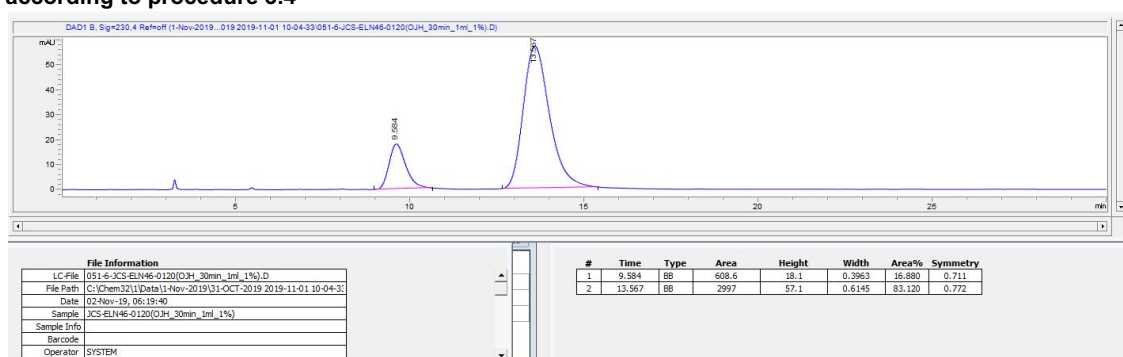

0 °C, 1.0 mol % Rh<sub>2</sub>(S-TPPTTL)<sub>4</sub>, 5.0 equiv styrene, 1.0 equiv *N,N,N',N'*-tetramethyl urea, CH<sub>2</sub>Cl<sub>2</sub> as solvent, reaction performed according to procedure 3.4

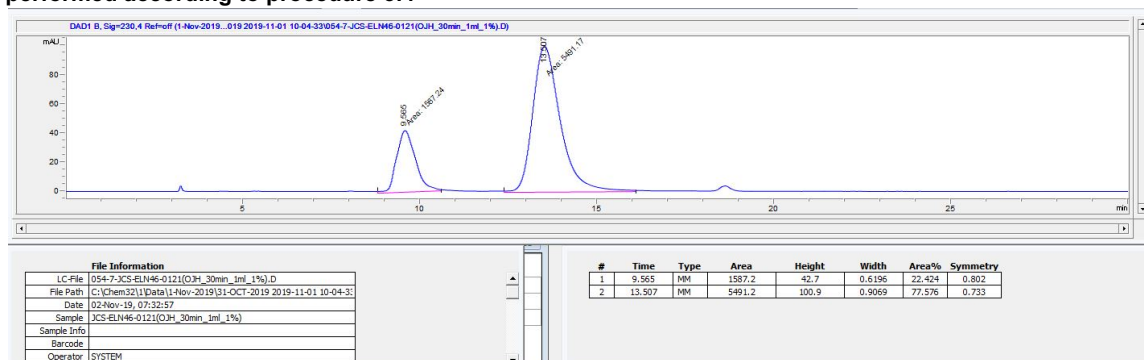

## 6. NMR Spectra:

20200817-JCS-ELN46-293.10.fid

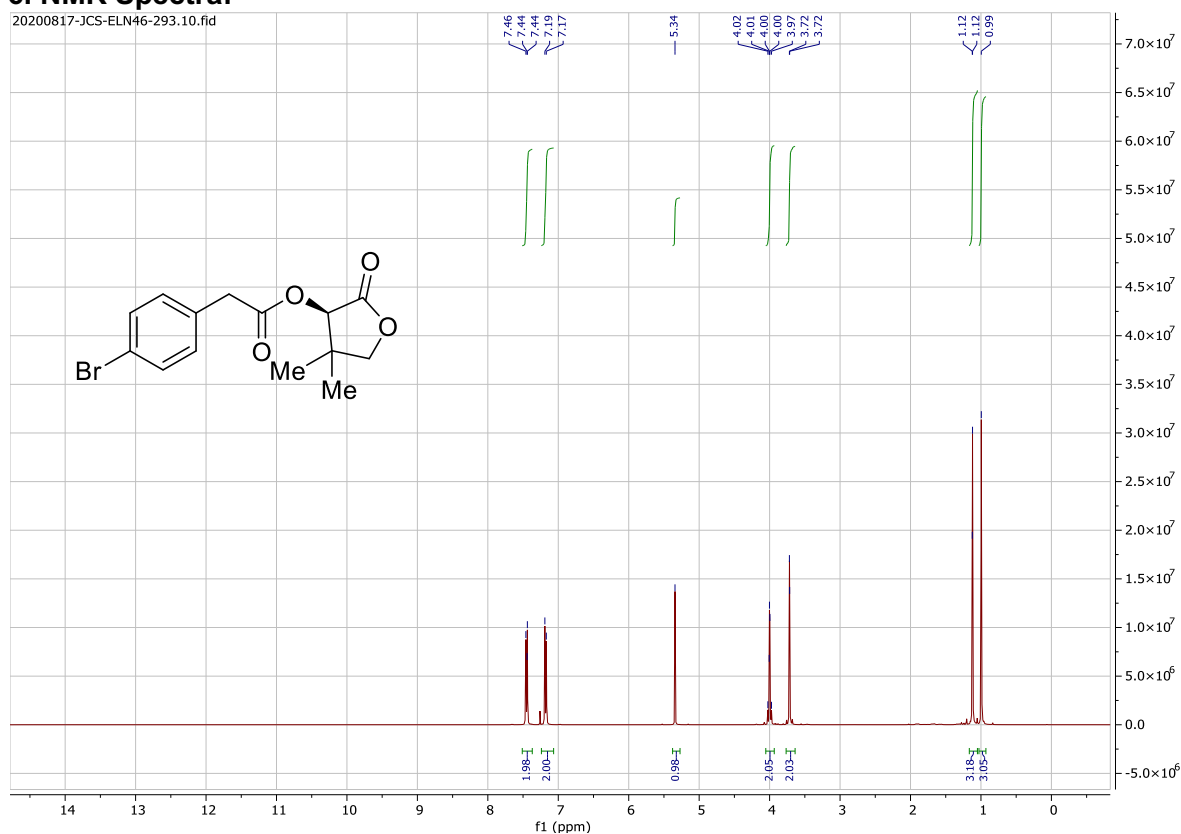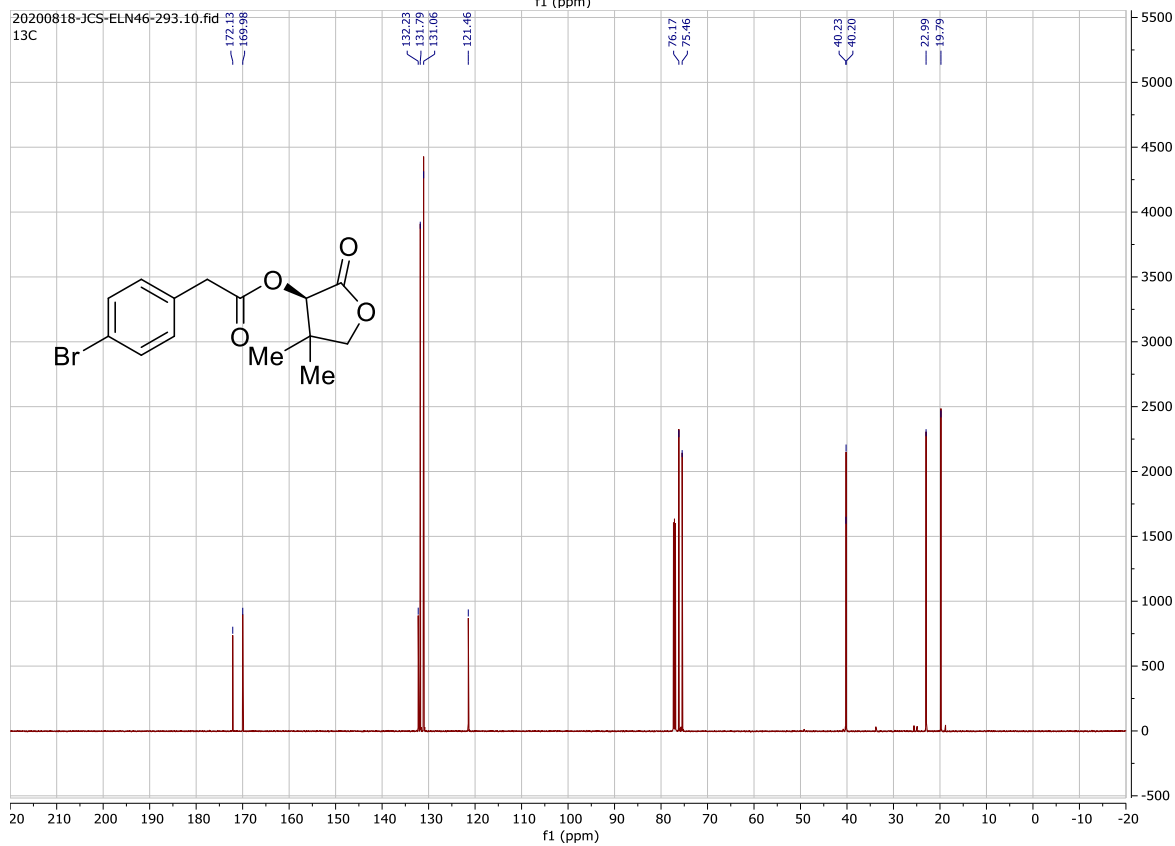

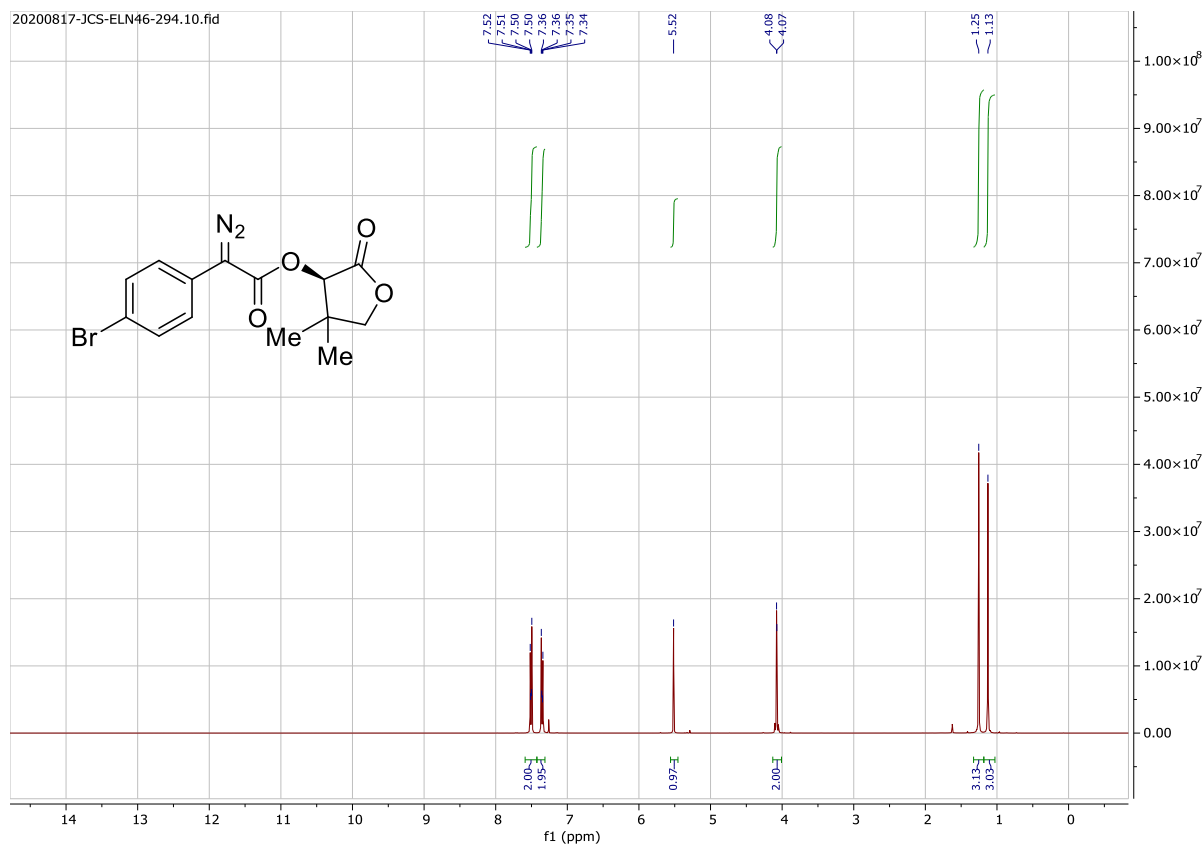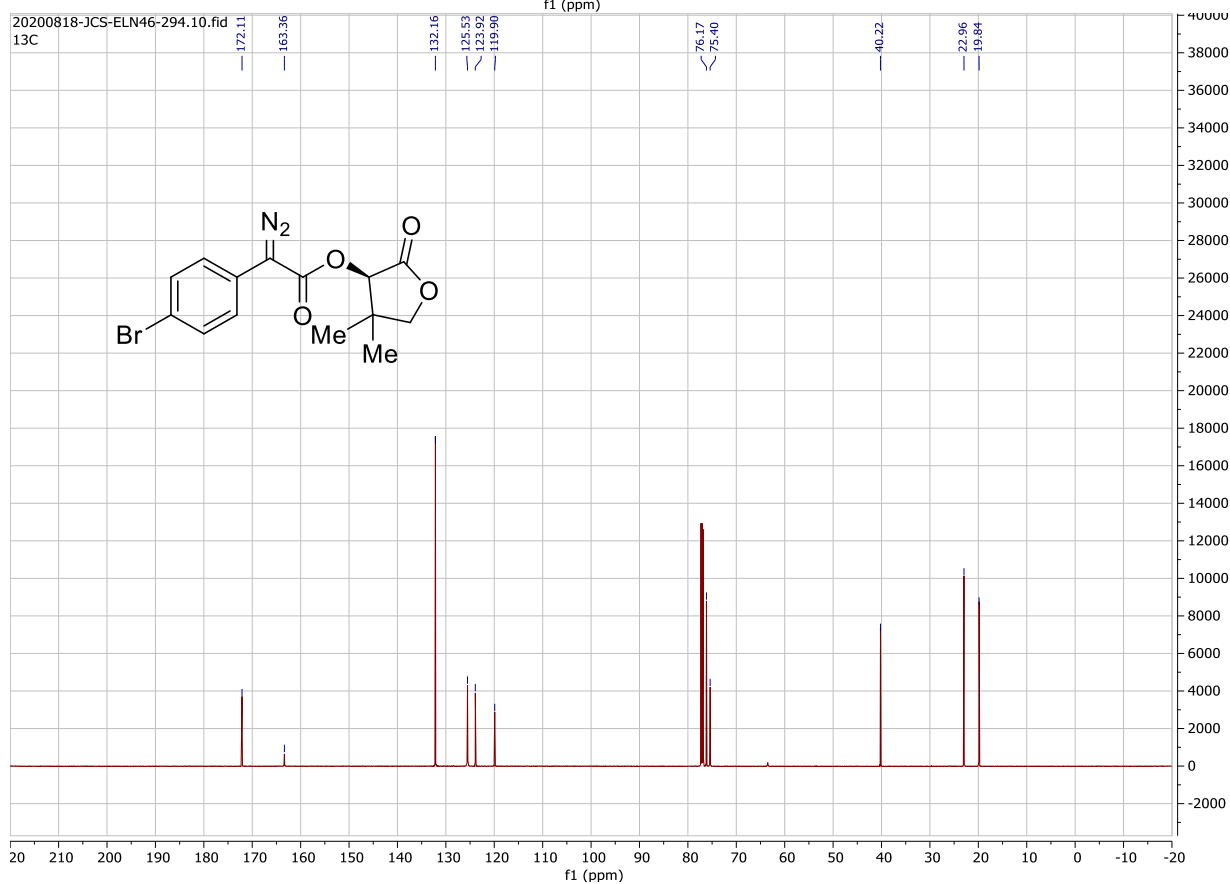

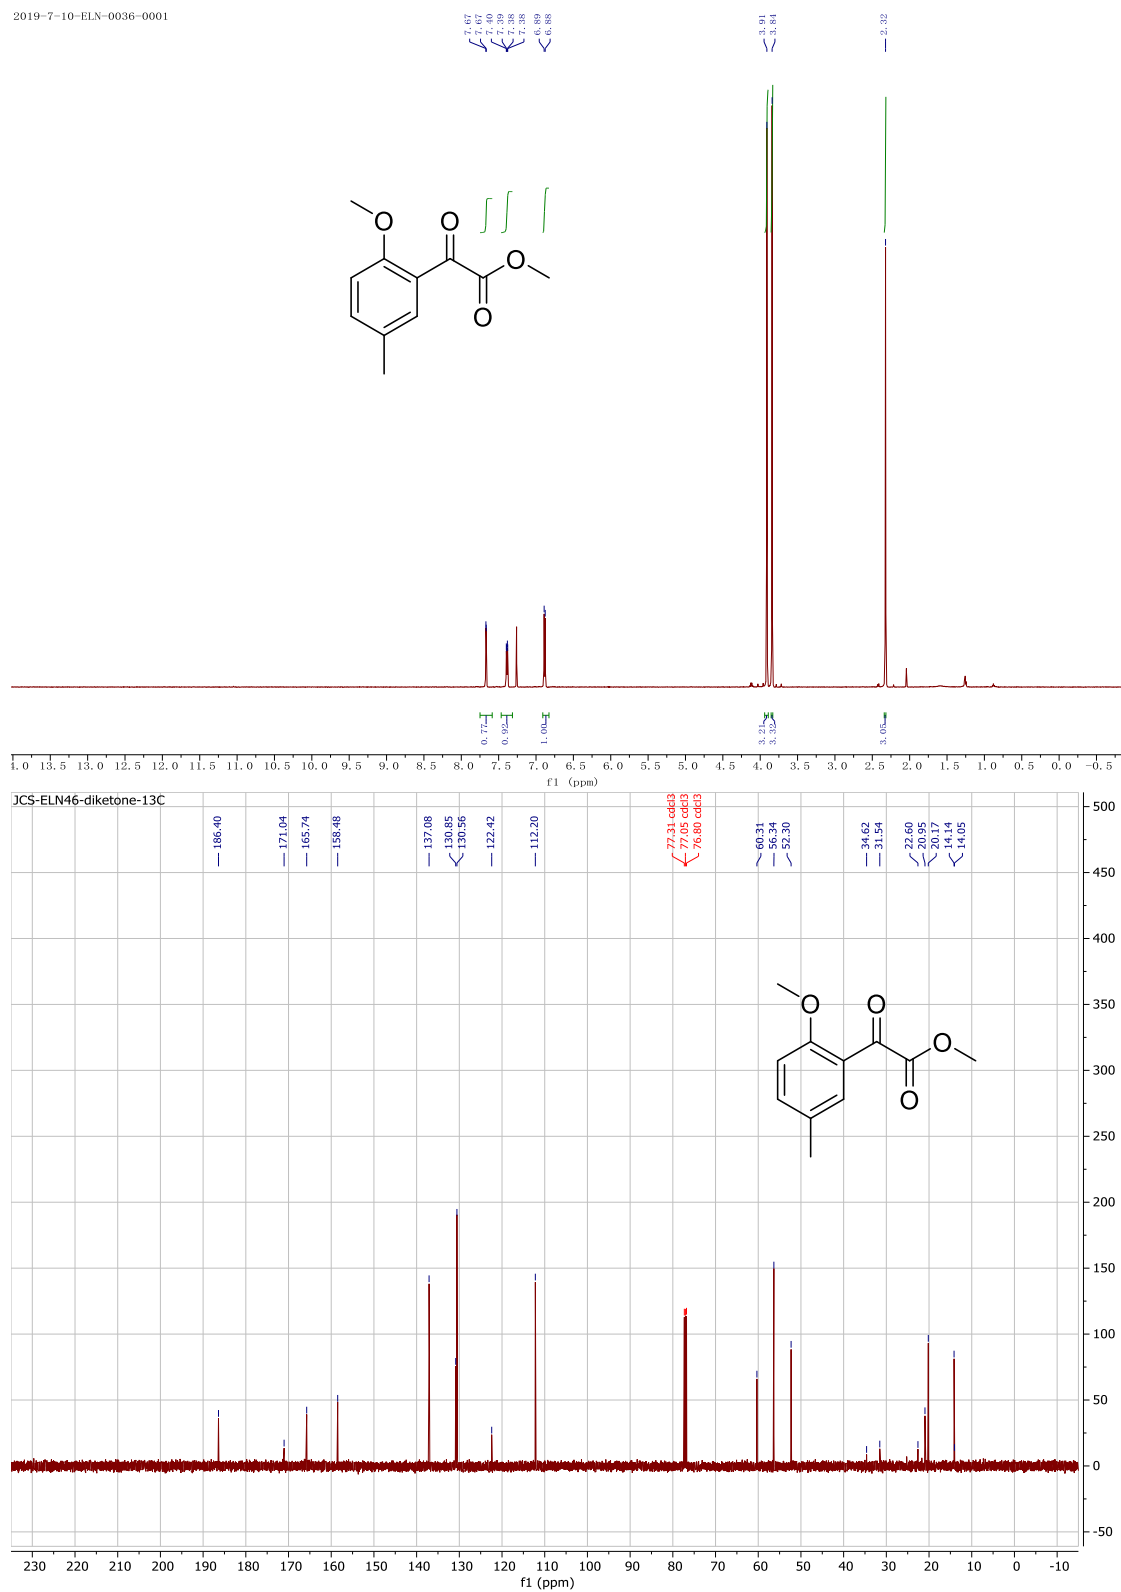

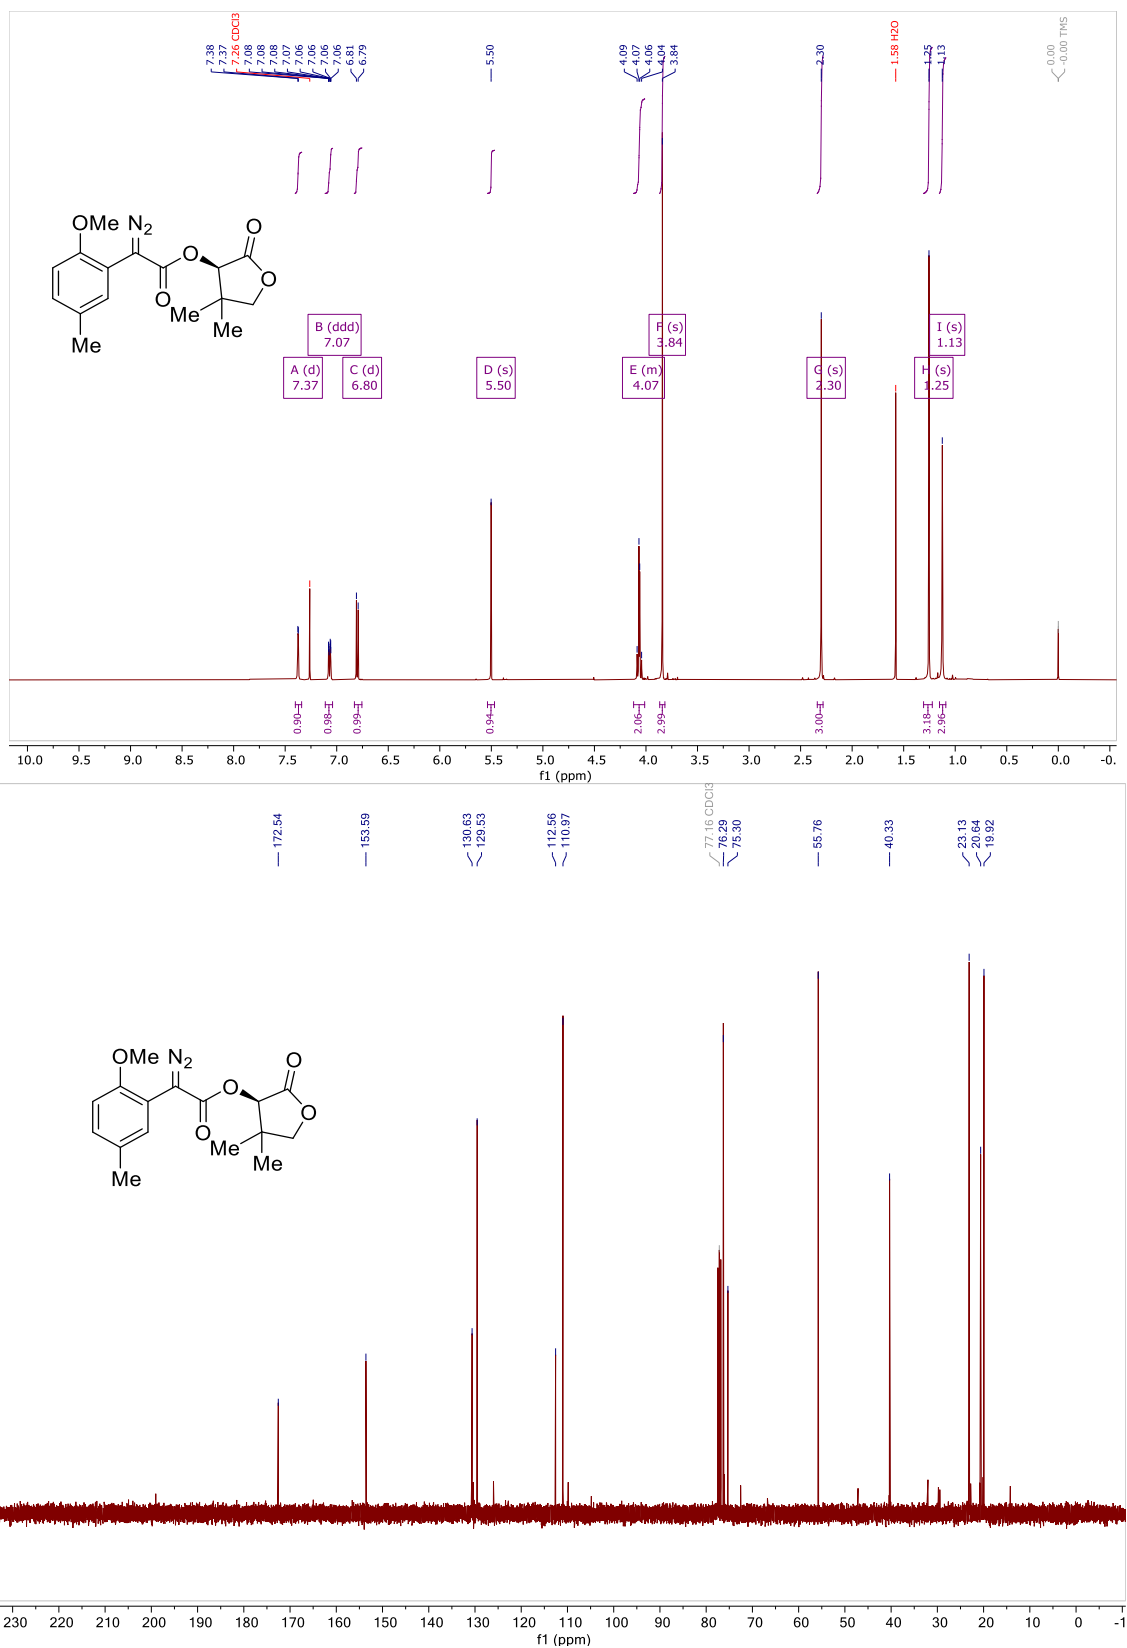

2019-7-16-Bo-ELN-0036-0012 —

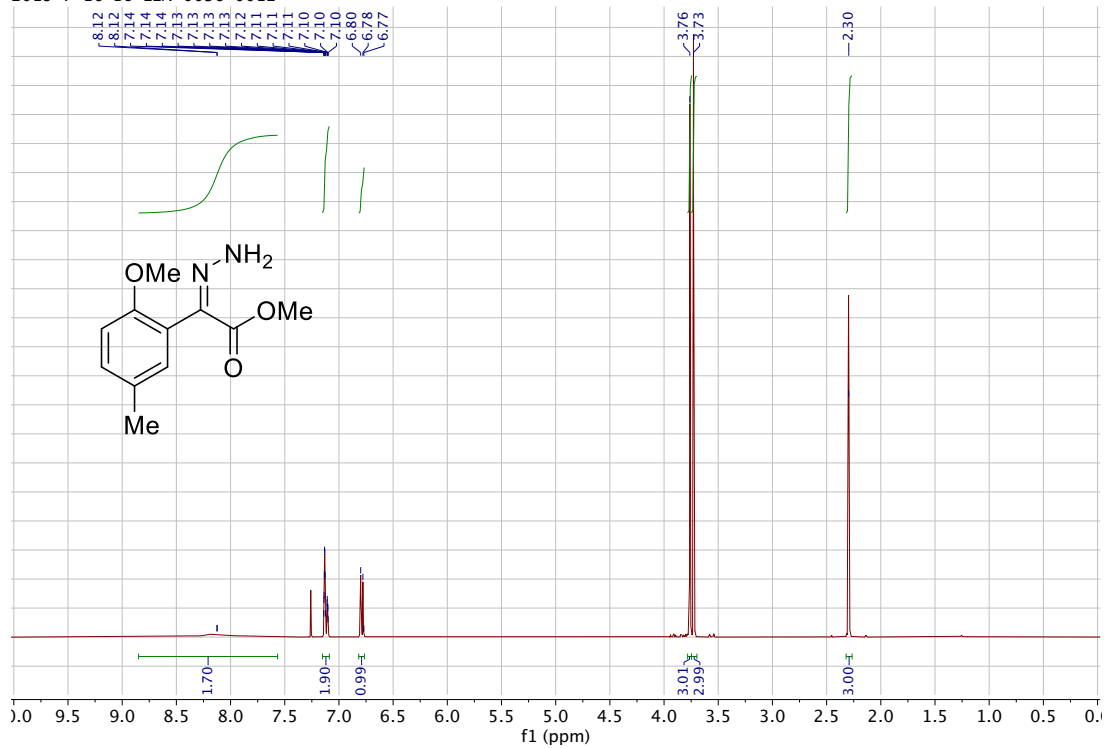

Bo-ELN-0036-0012.10.fid —

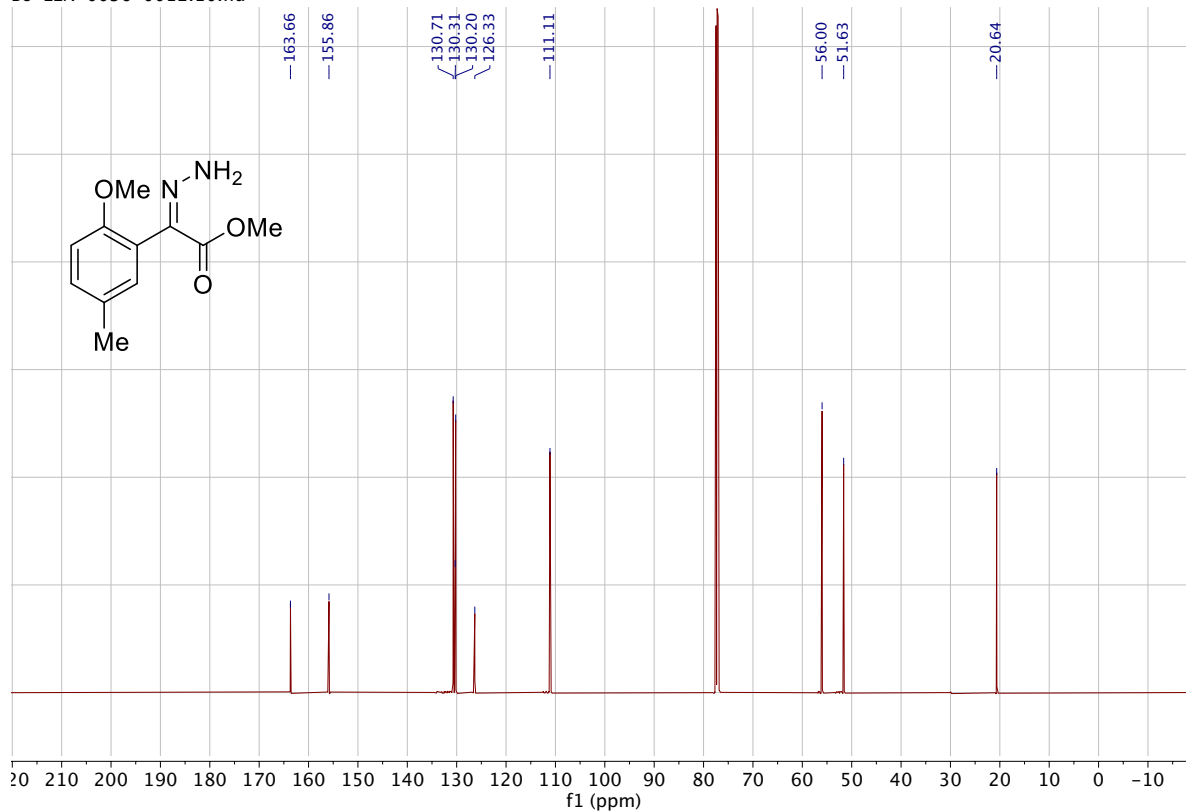

20200729-Bo-38-E.10.fid —

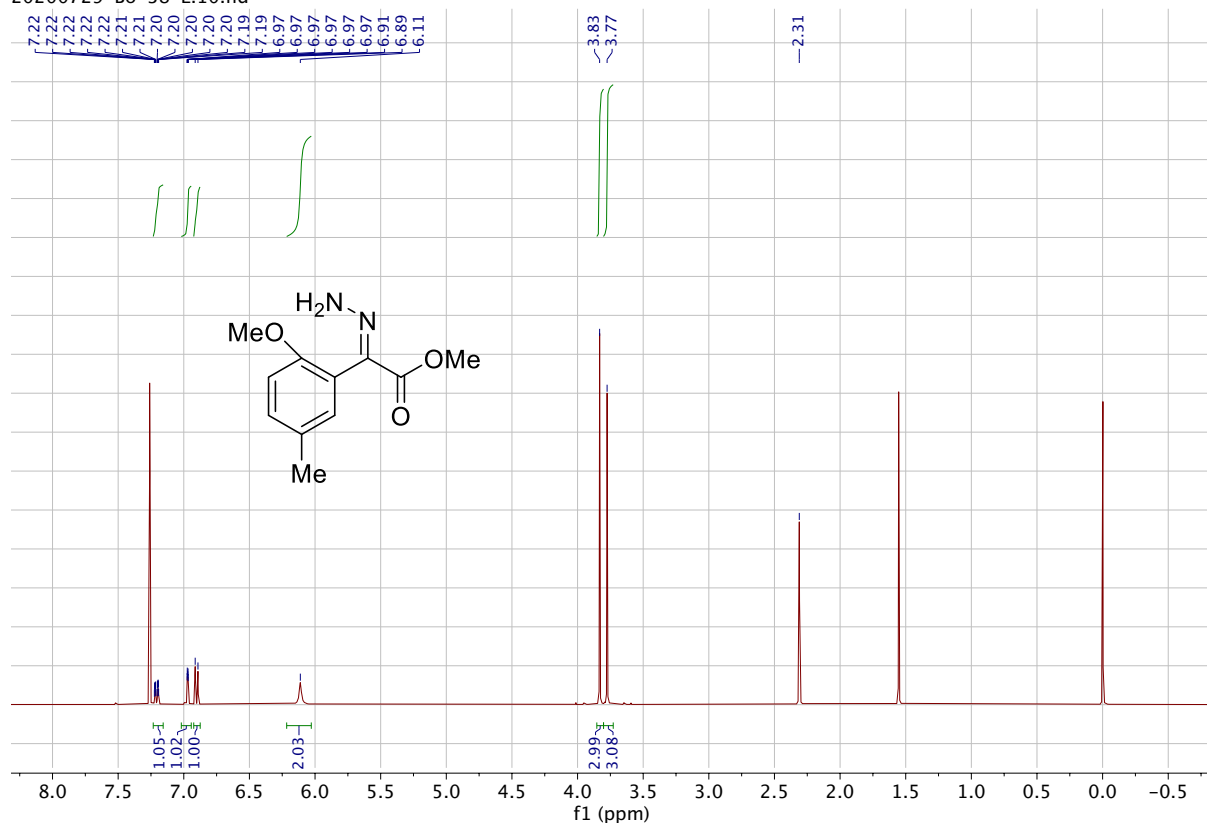

20200725-Bo-ABVHY-E.11.fid — 13C

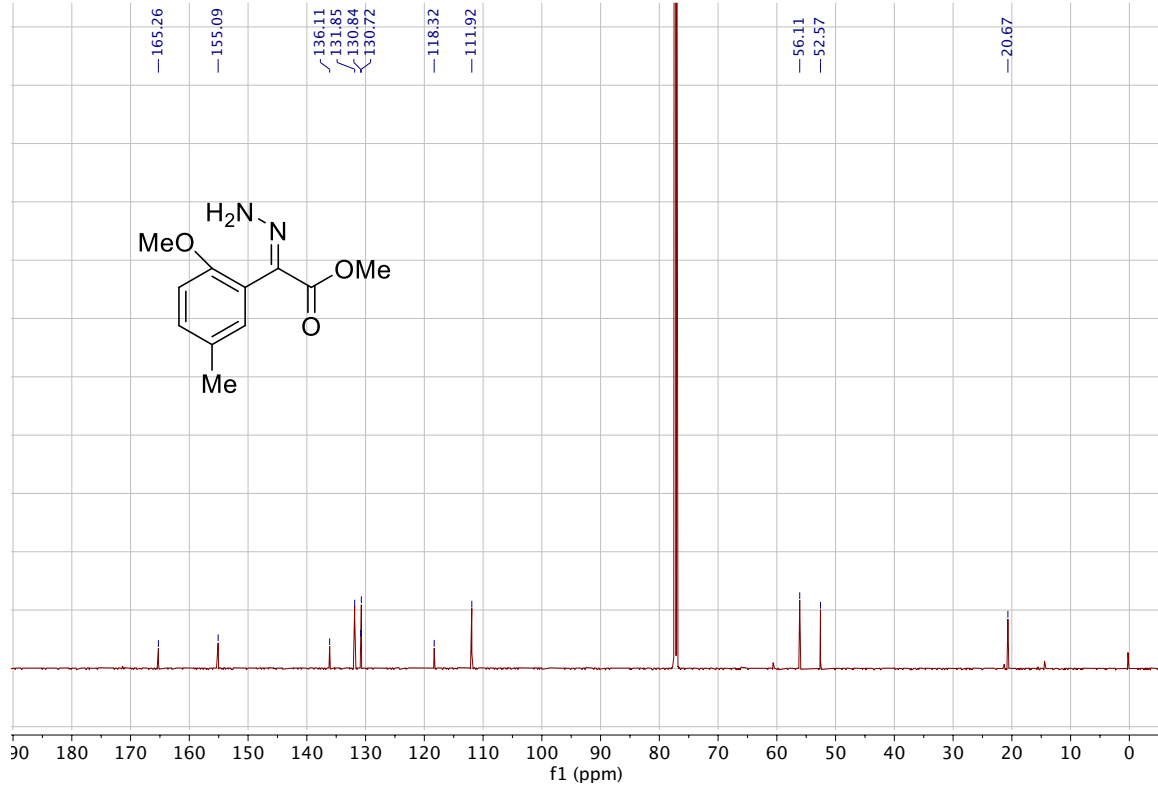

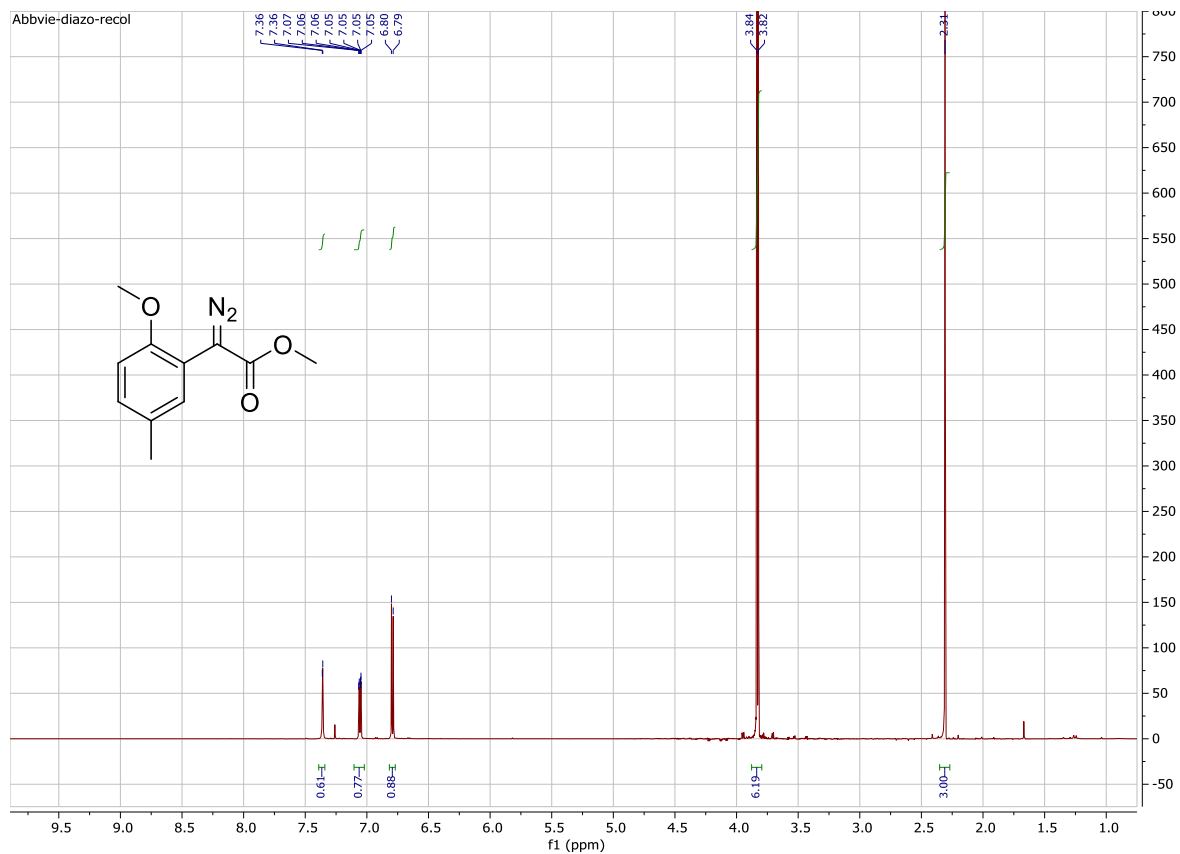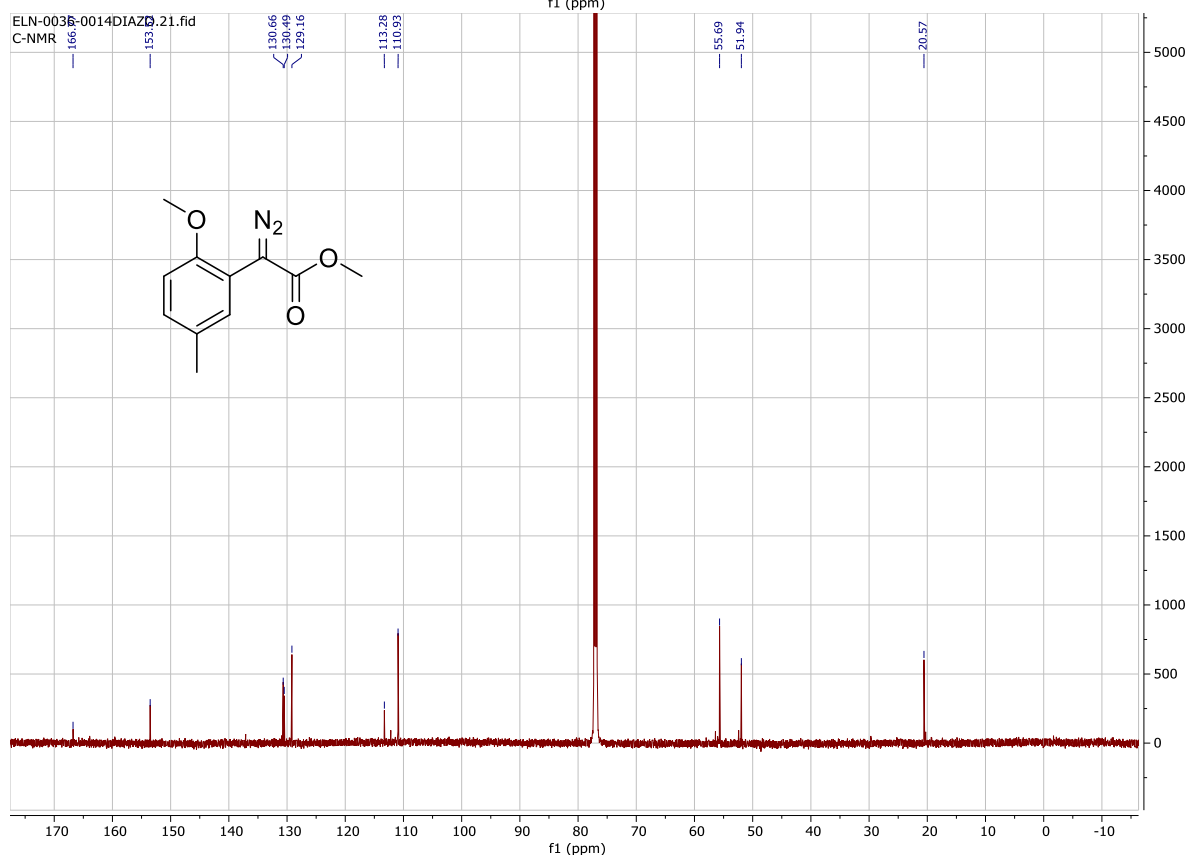

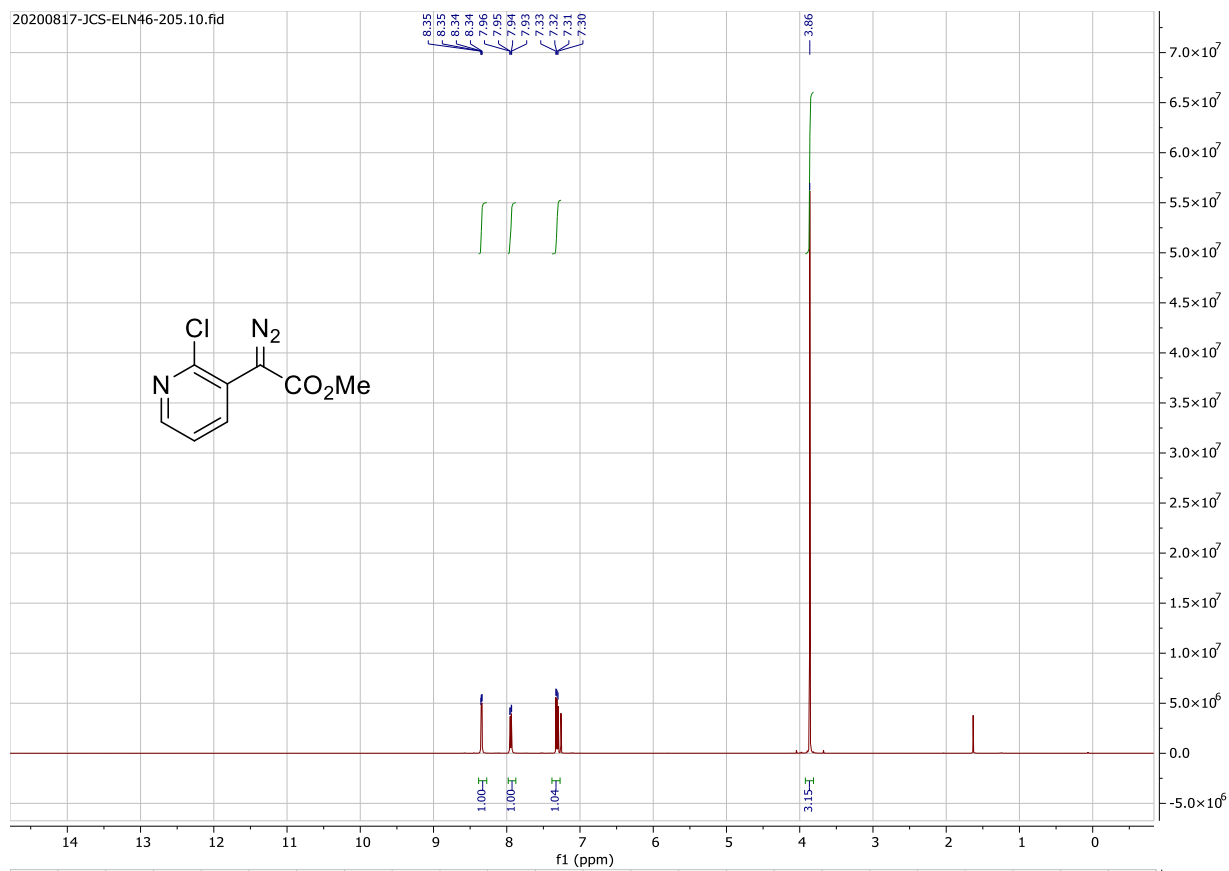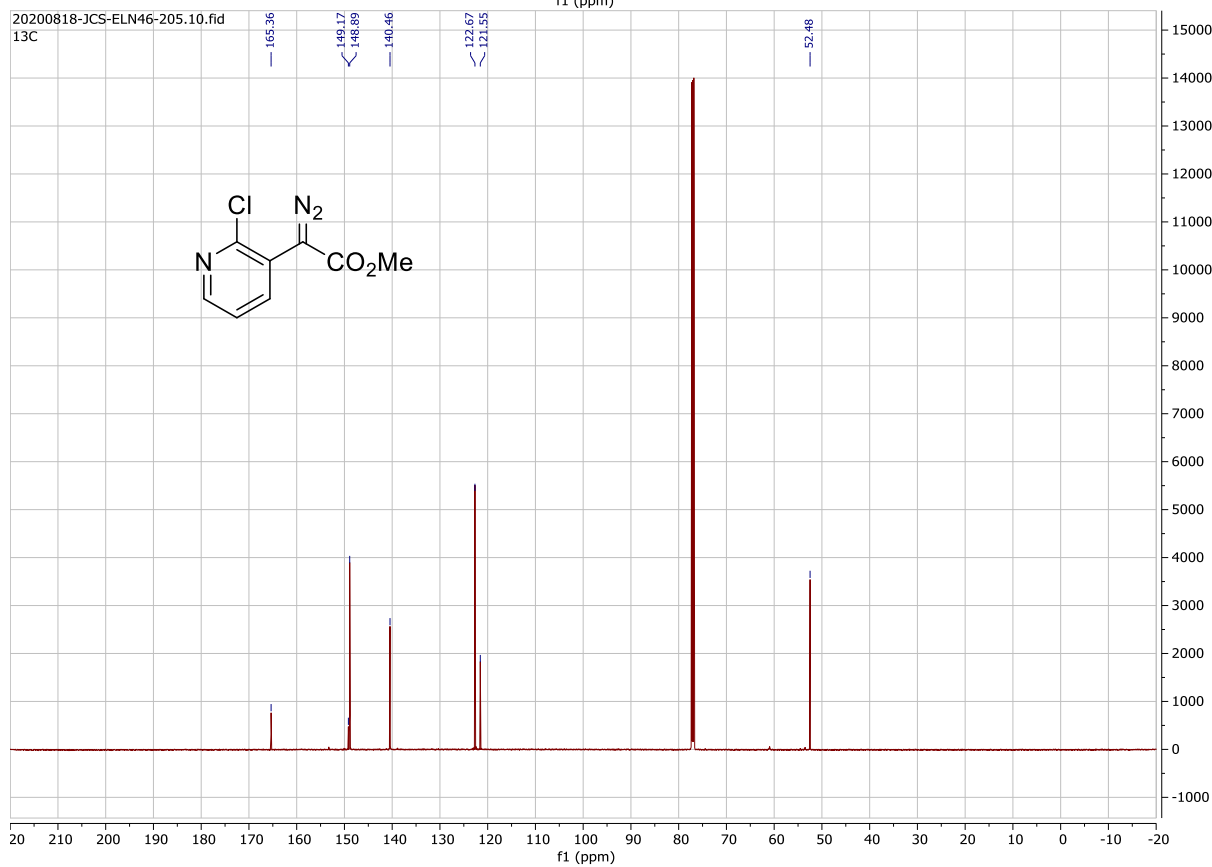

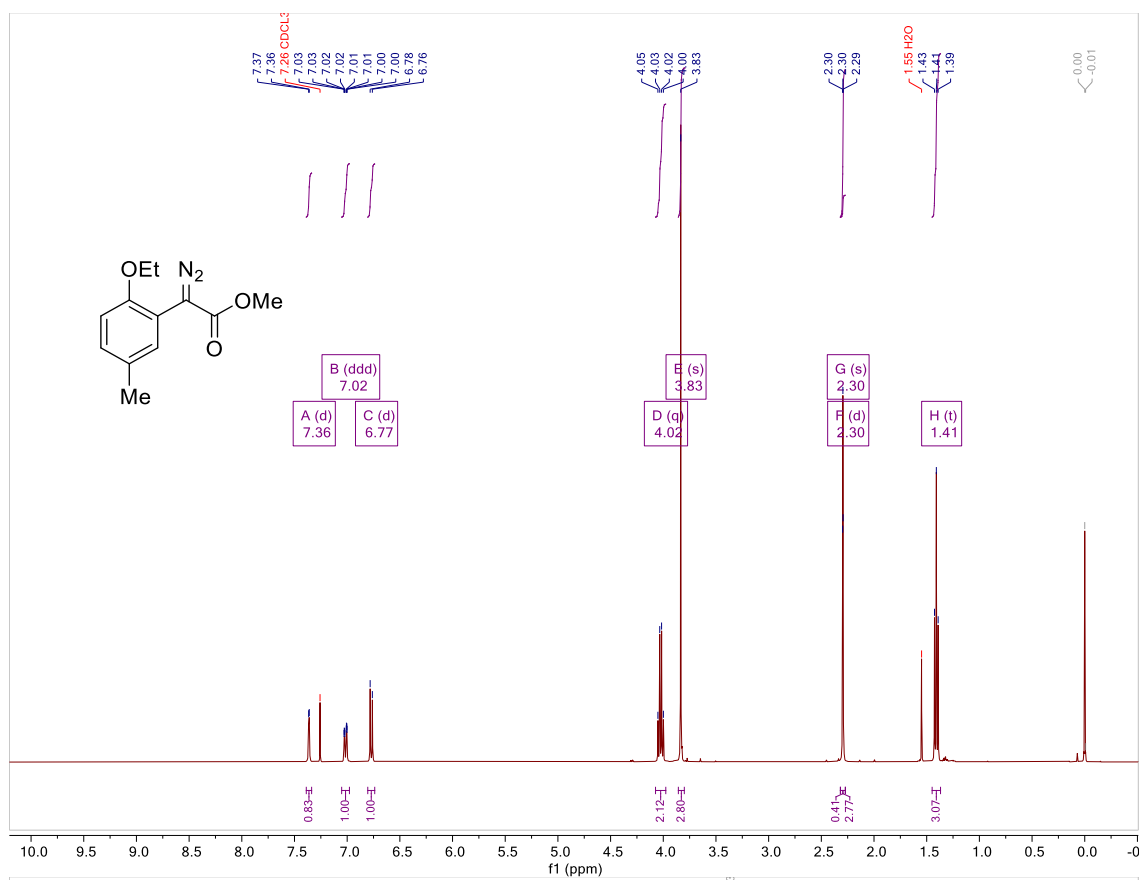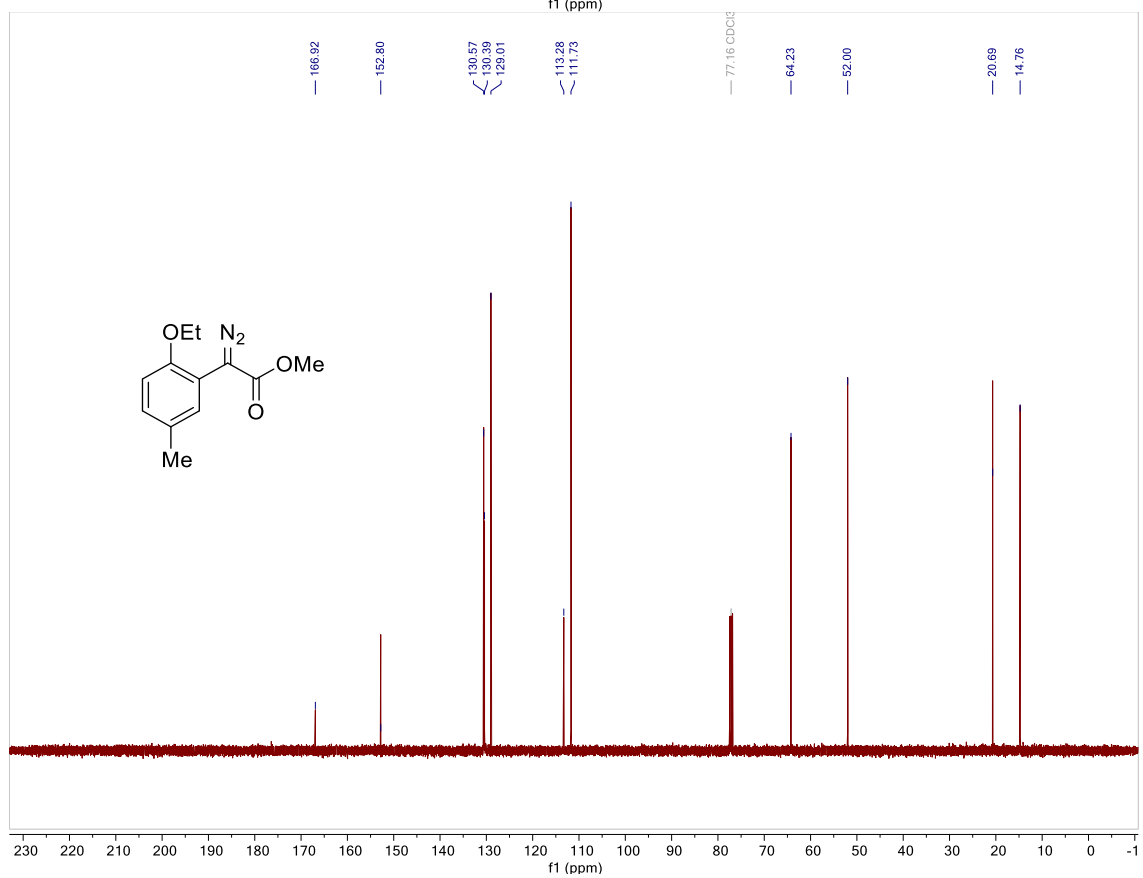

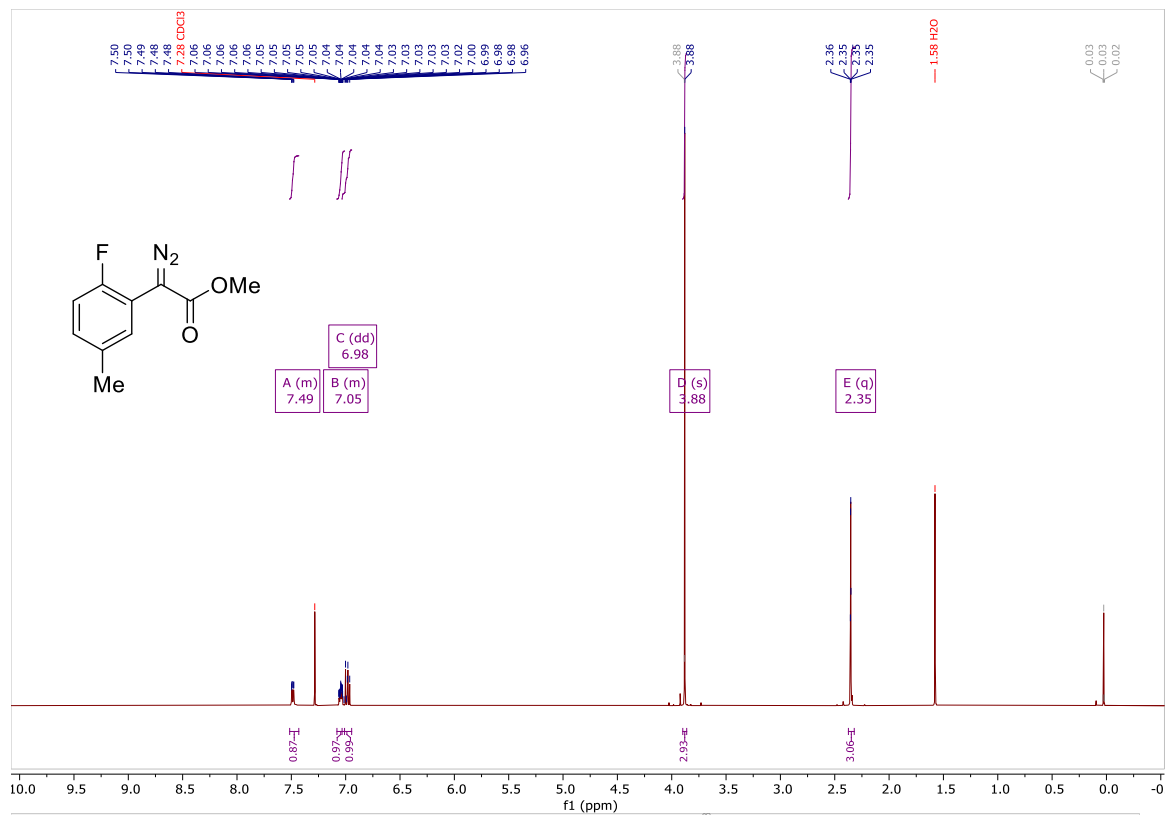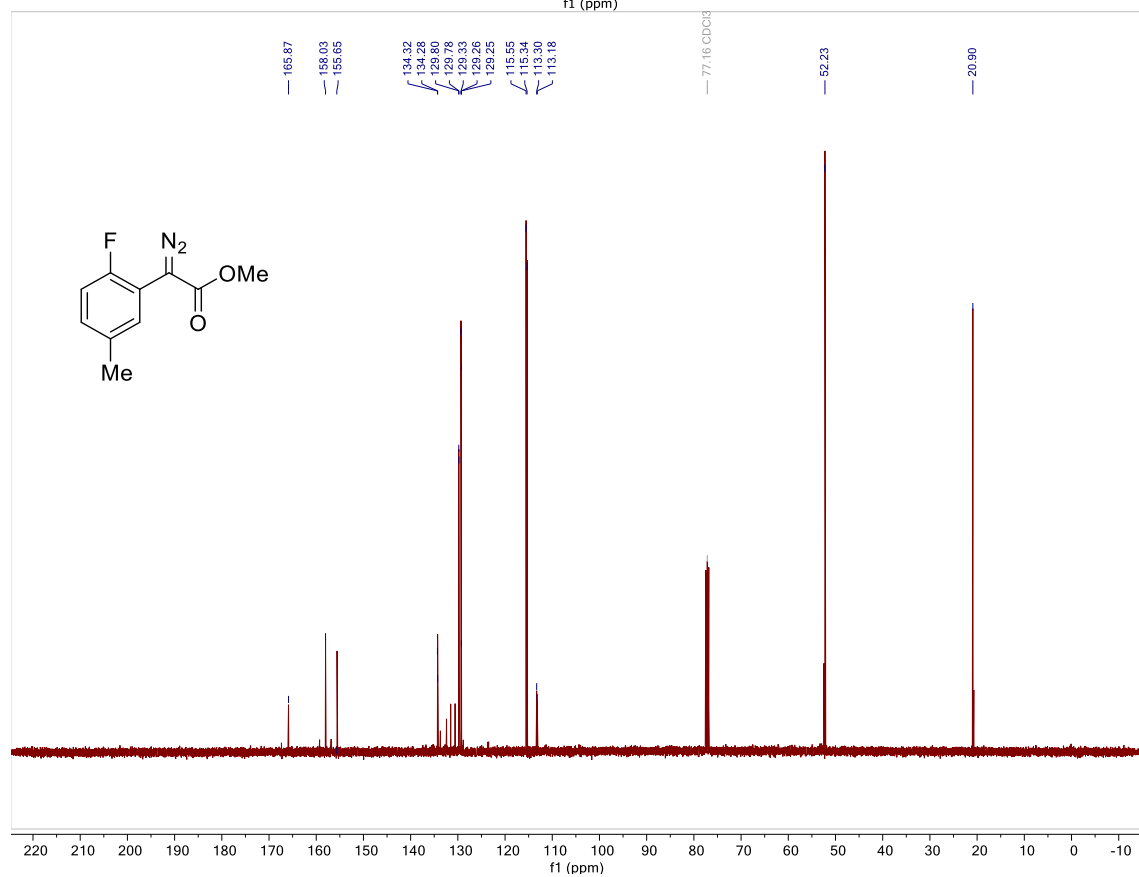

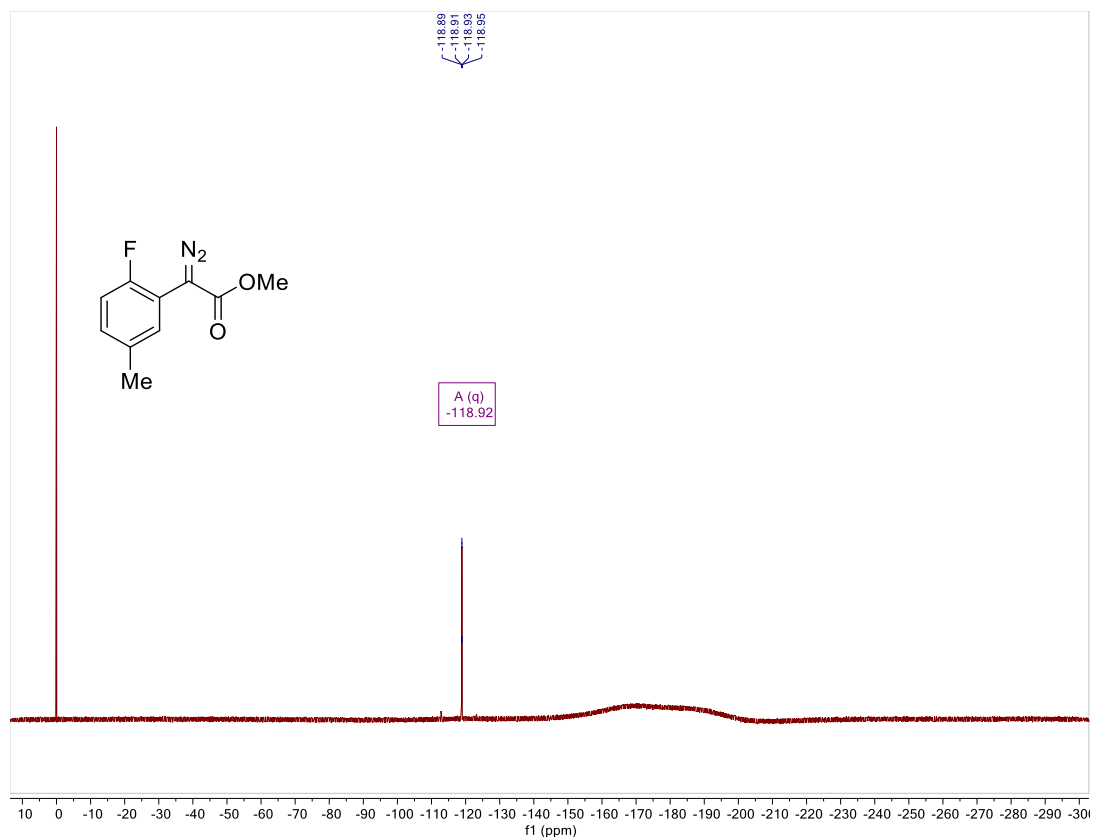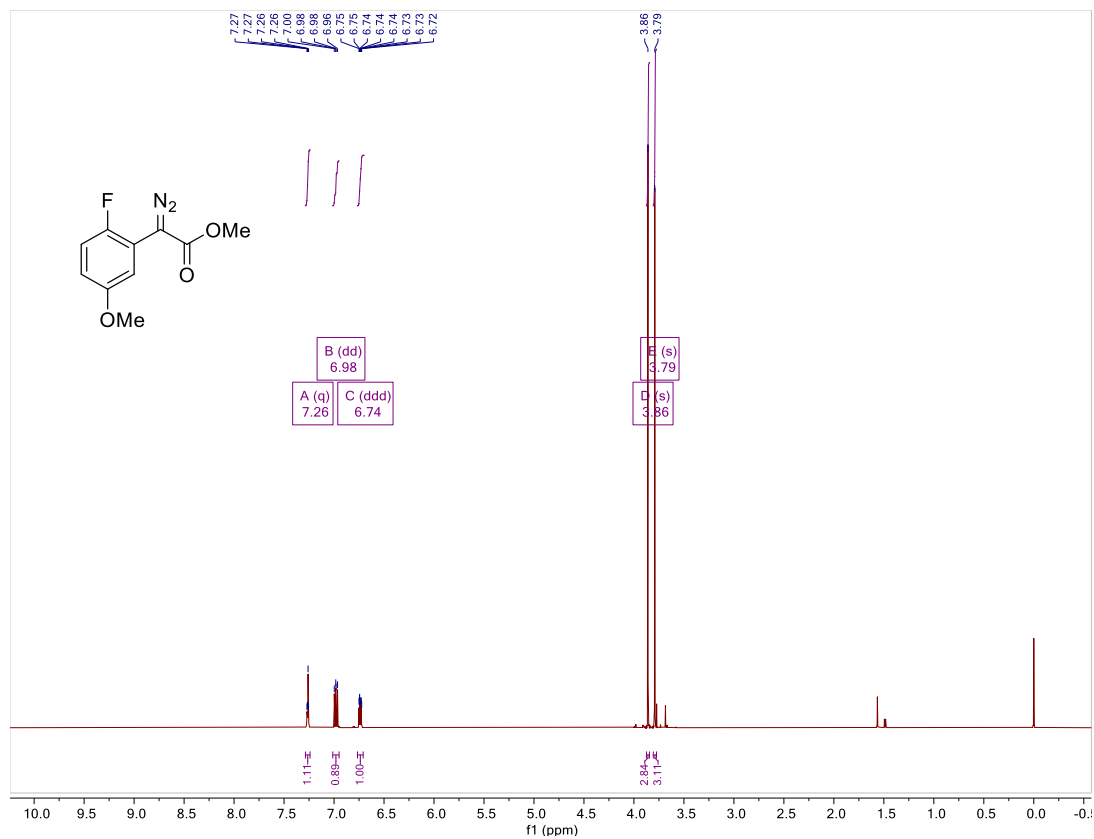

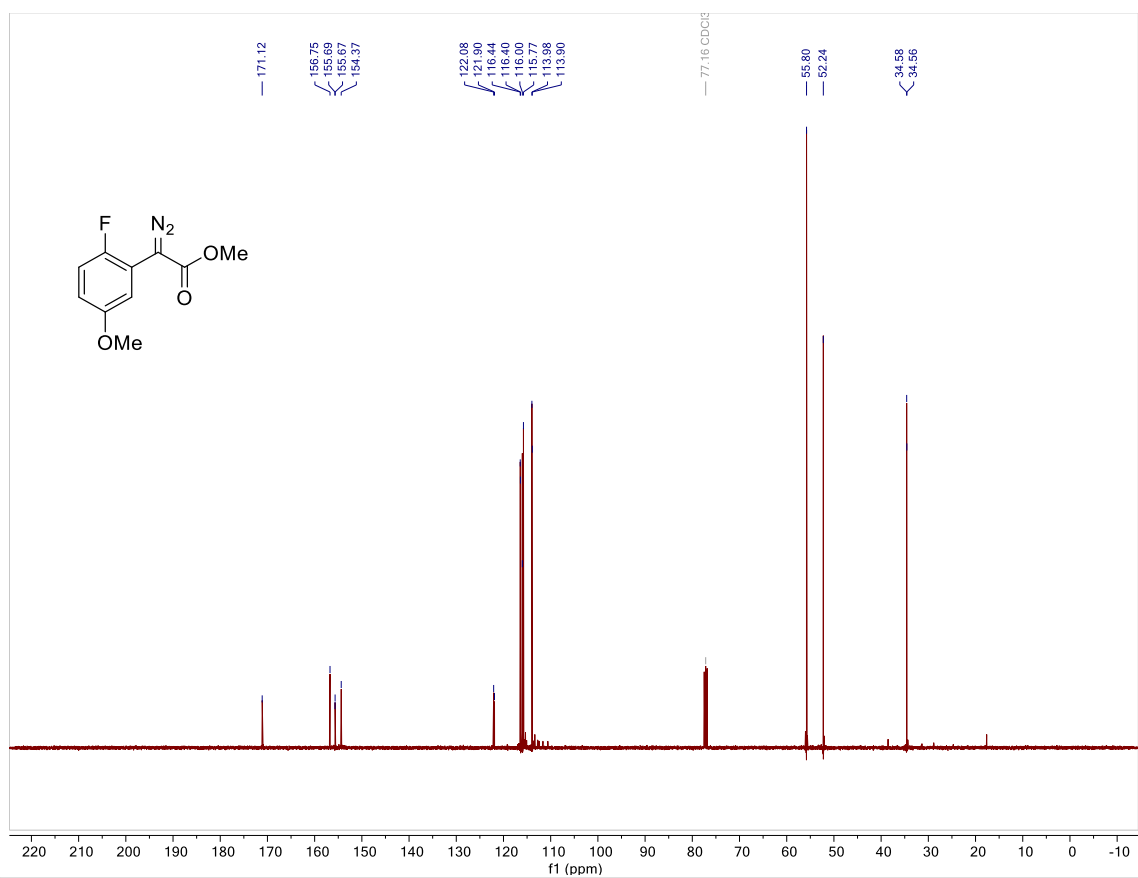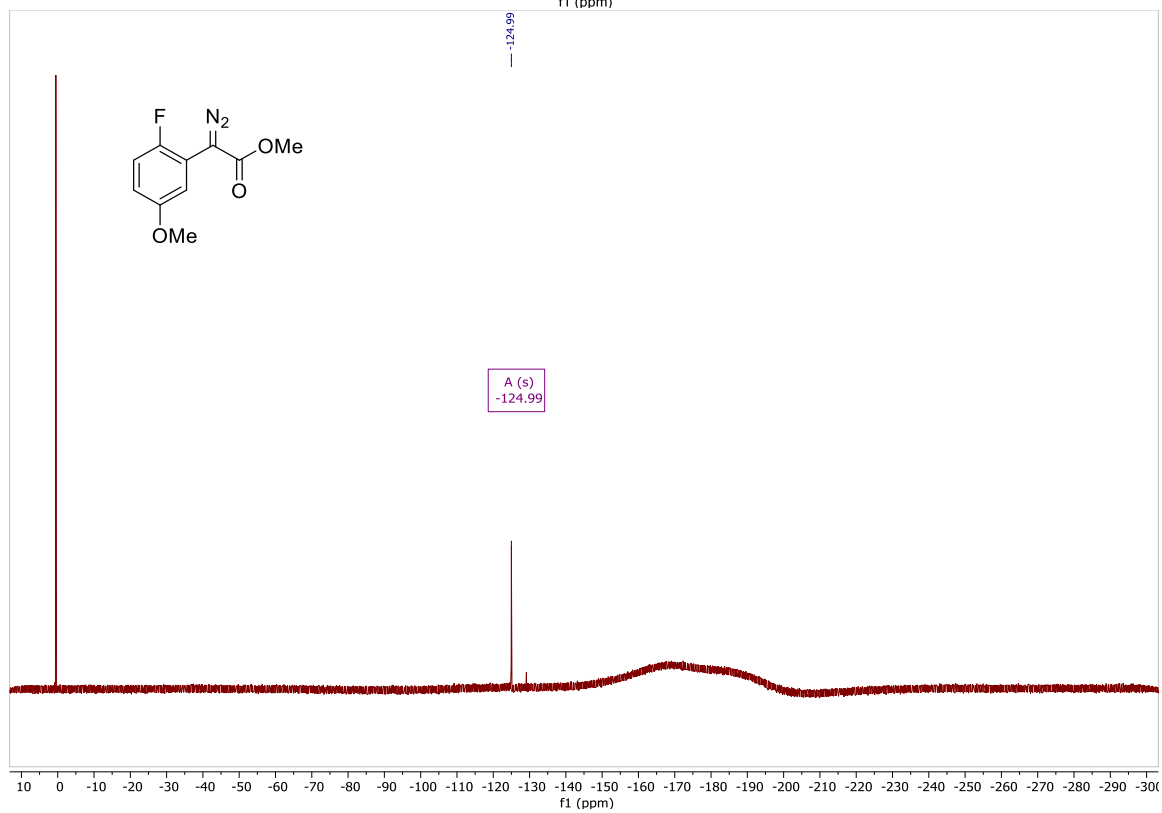

2020-1-24-Bo-ELN-36-py-recycle — —

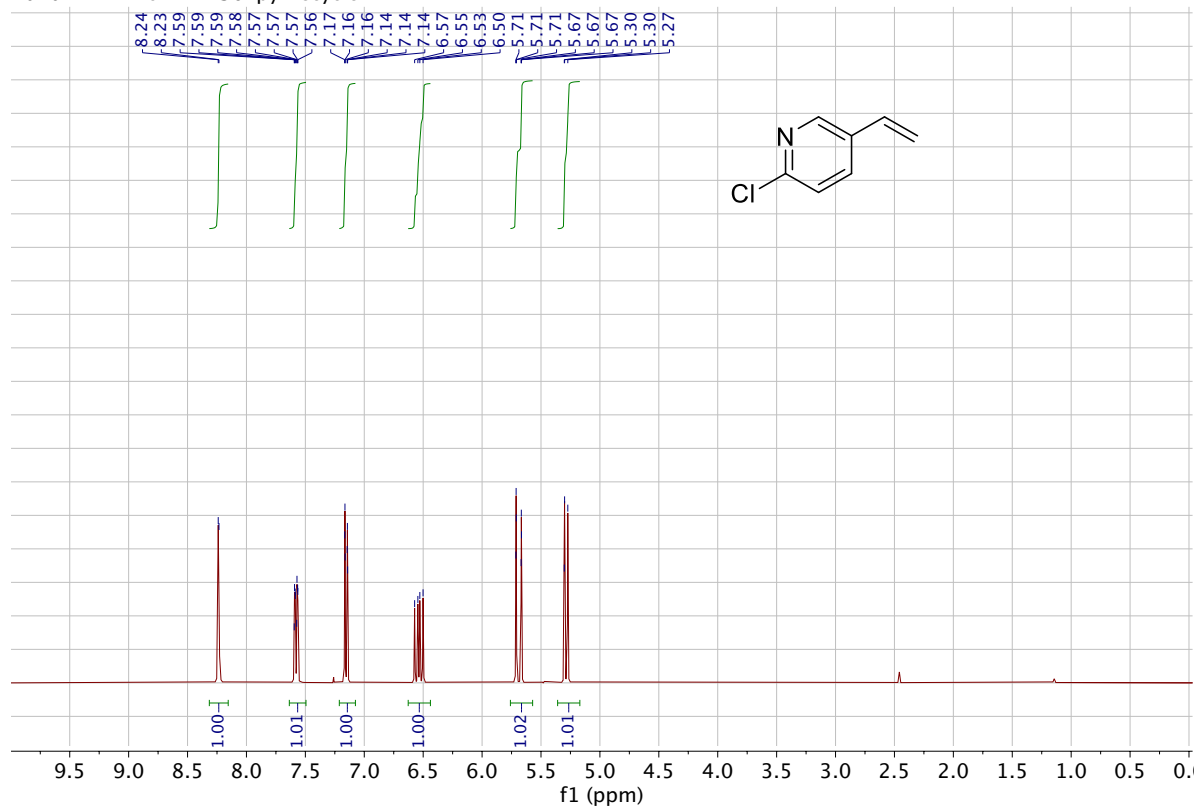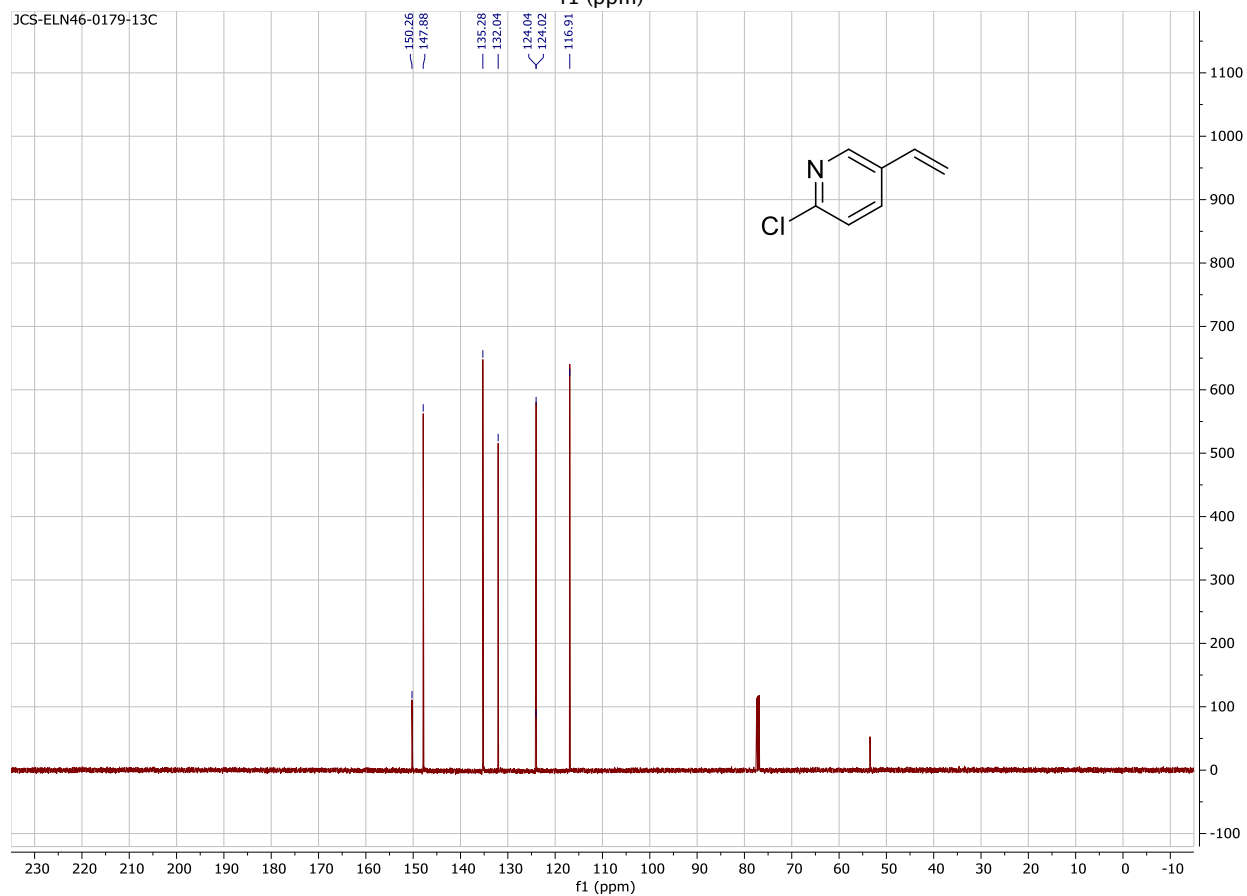

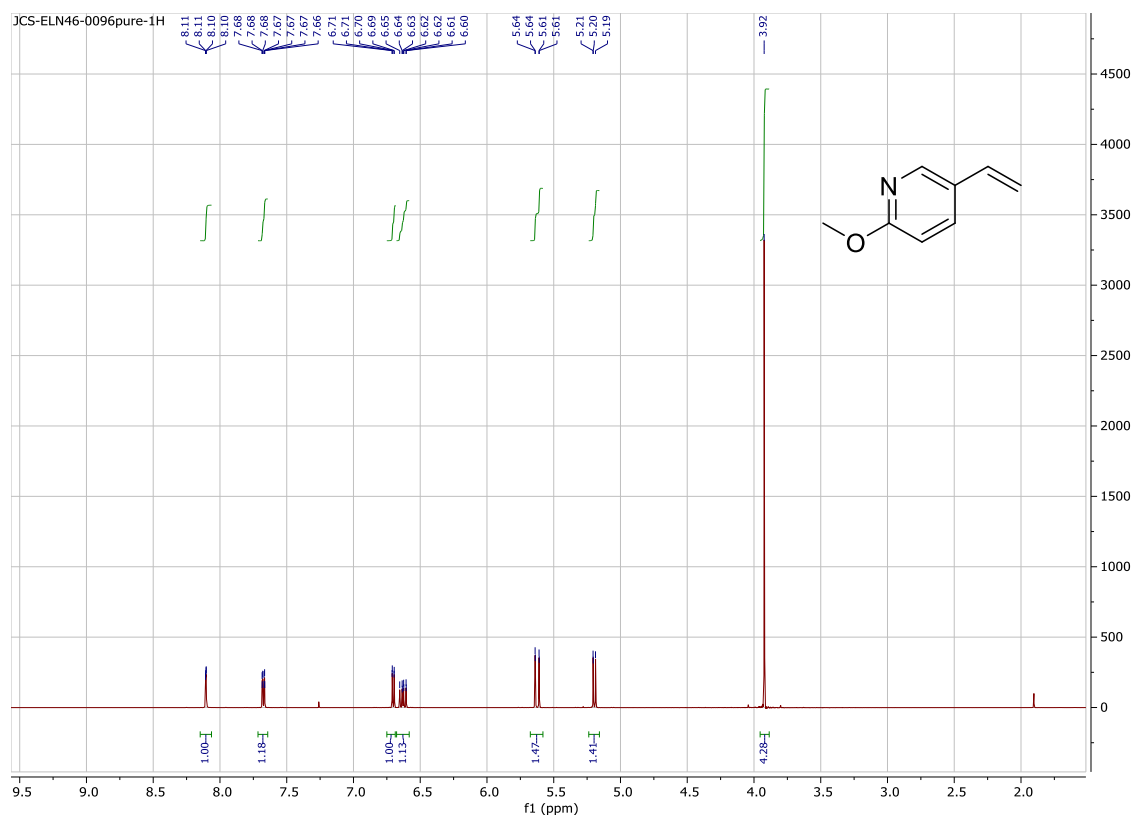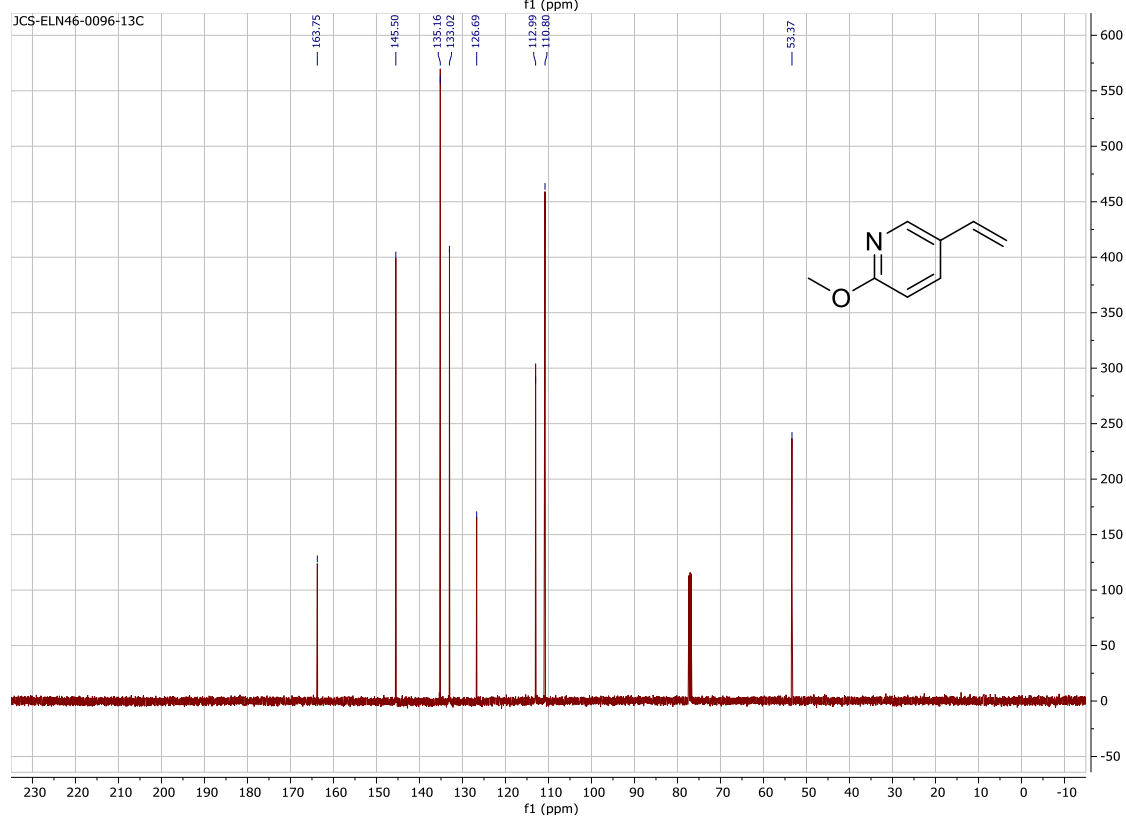

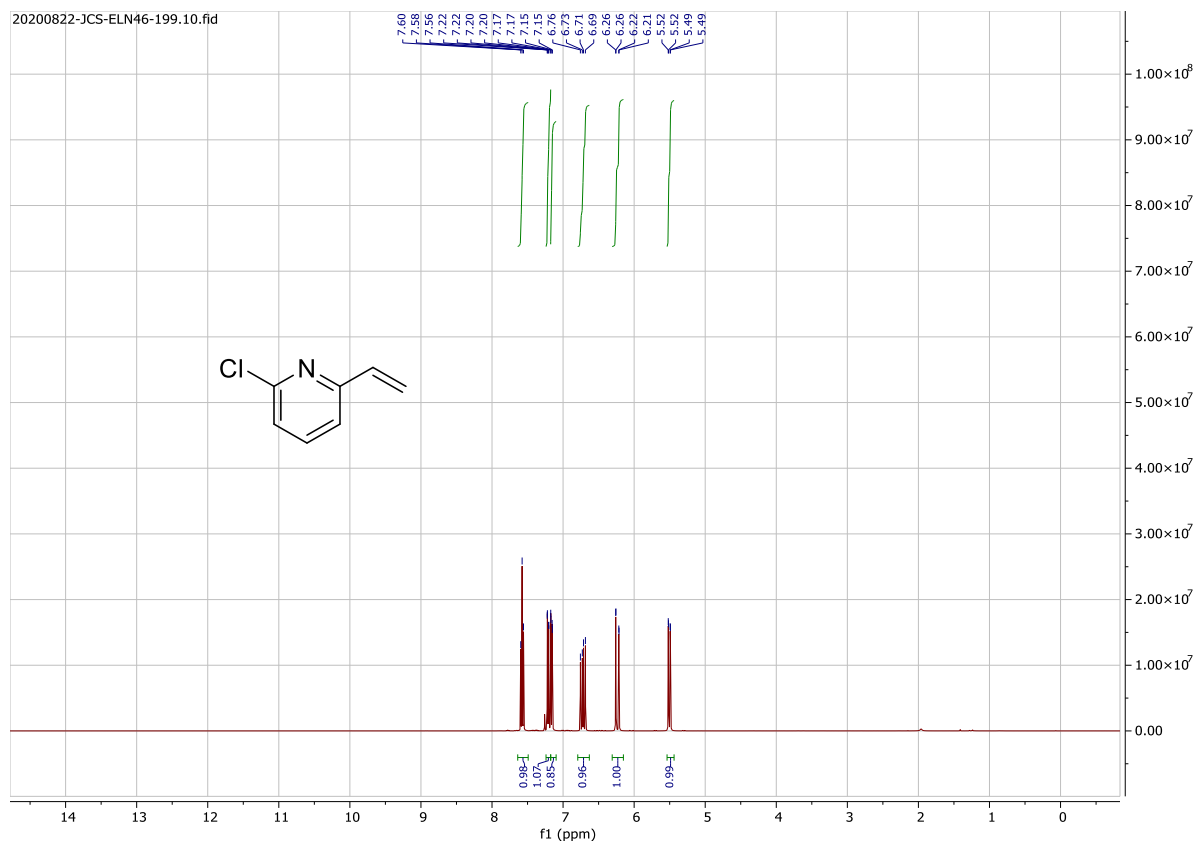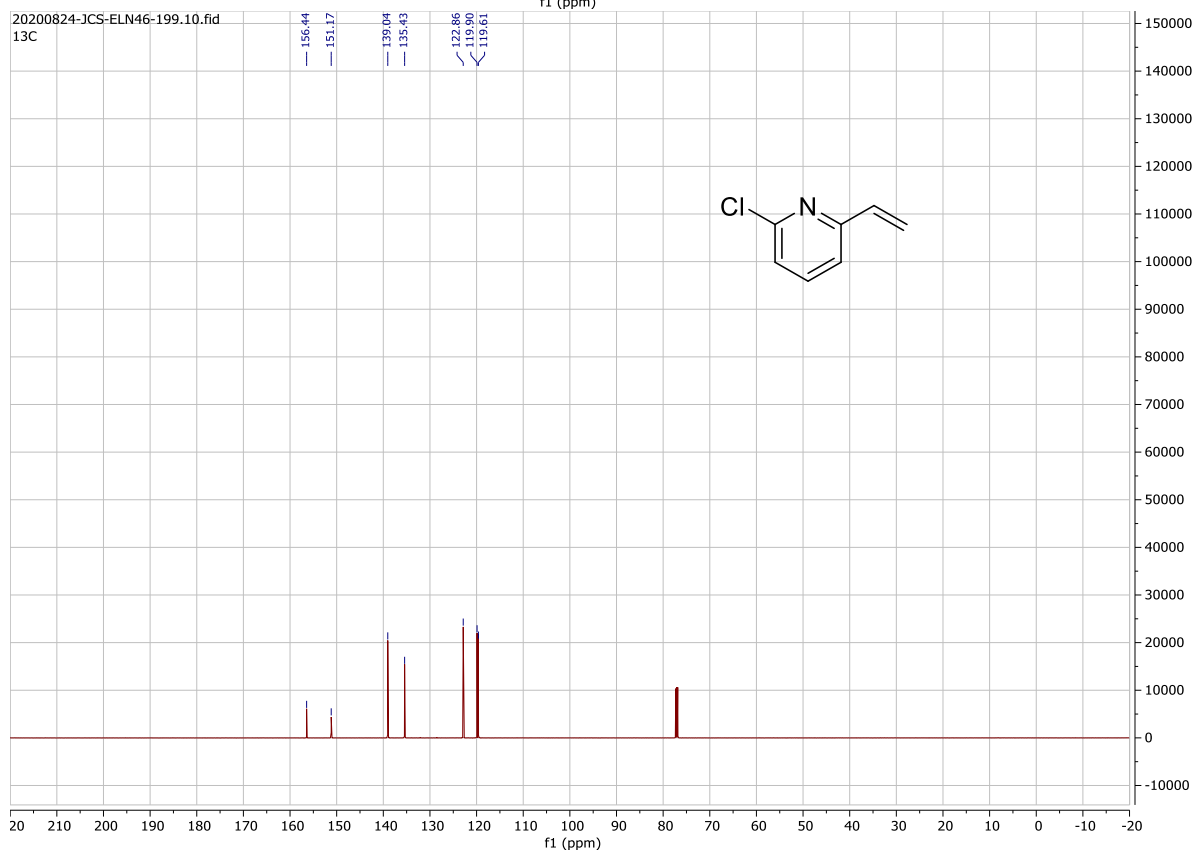

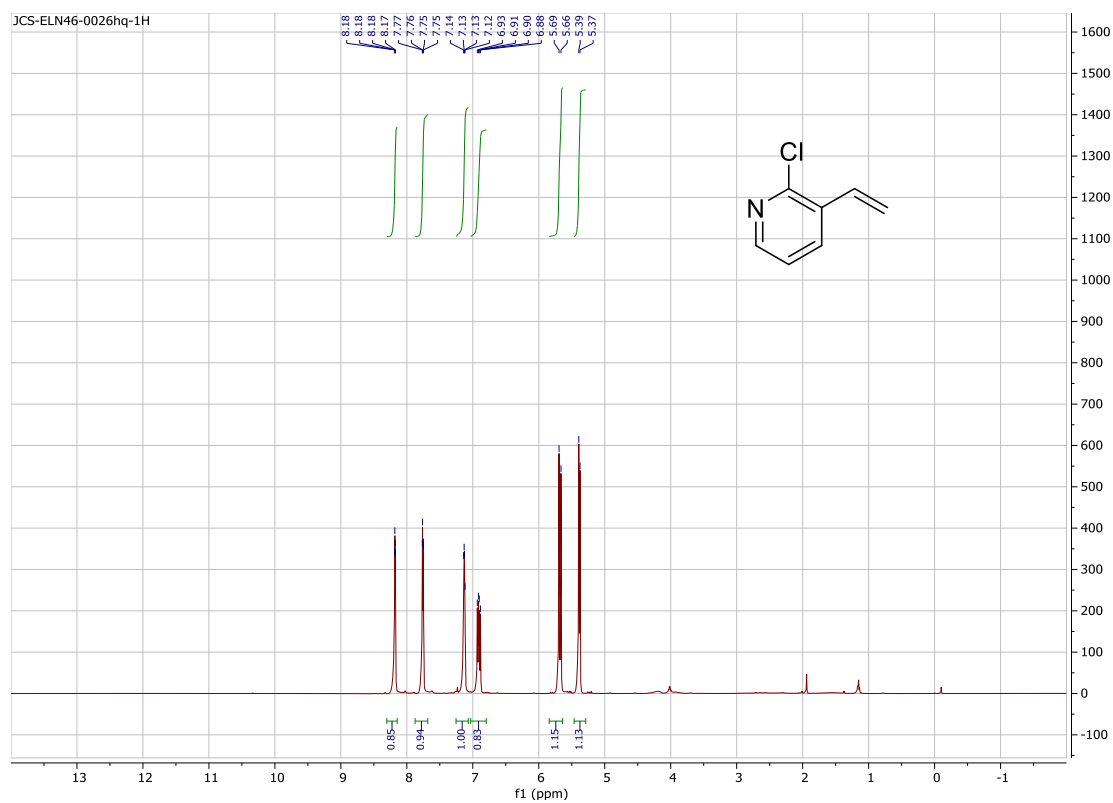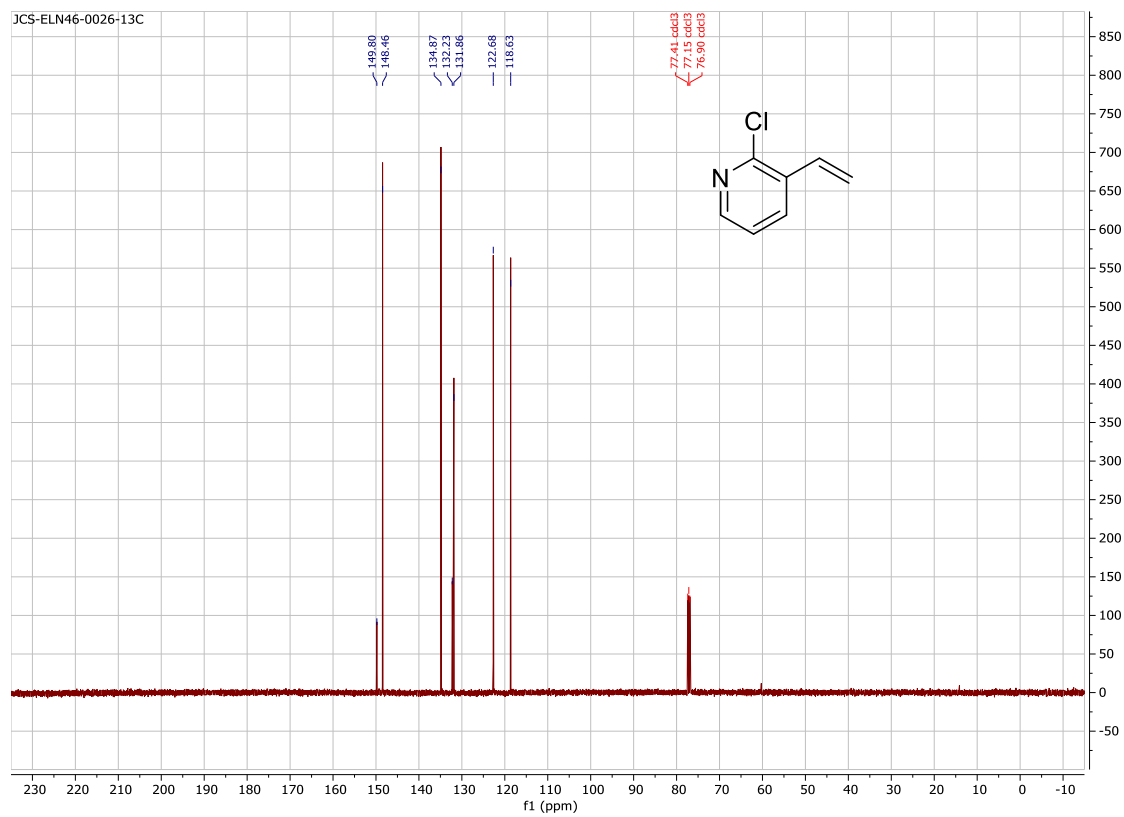

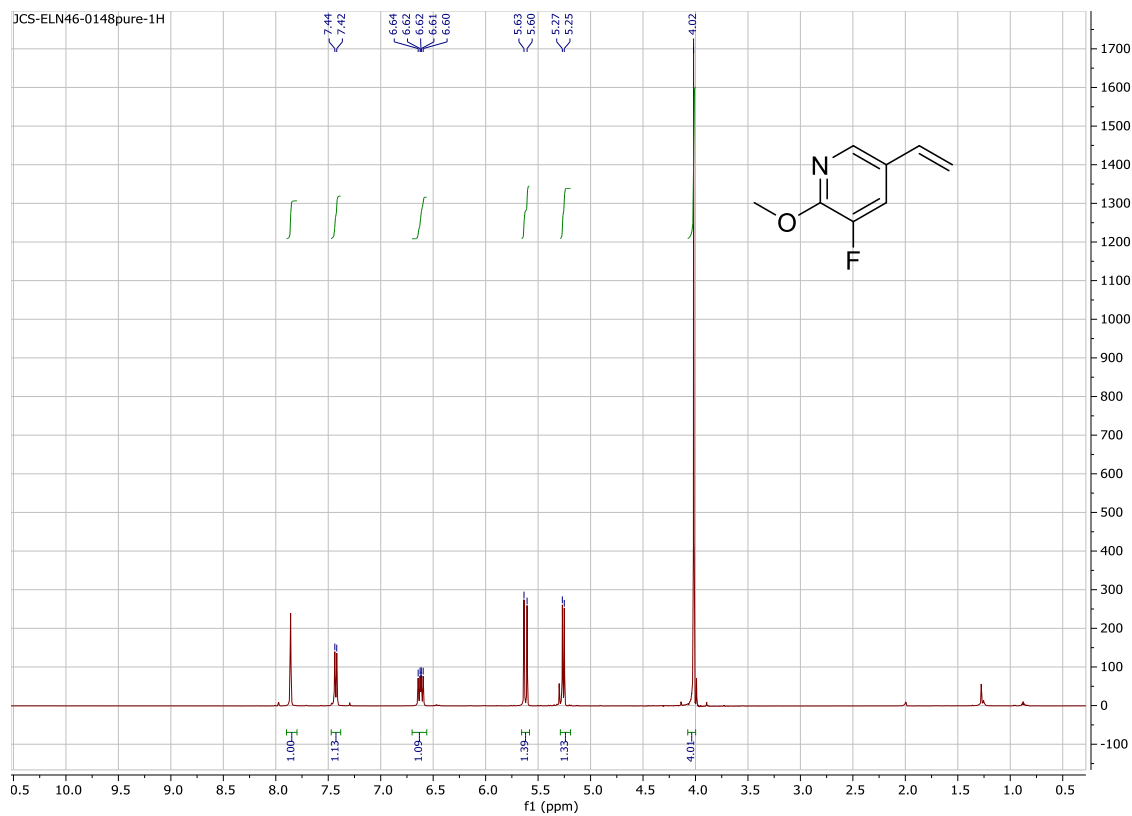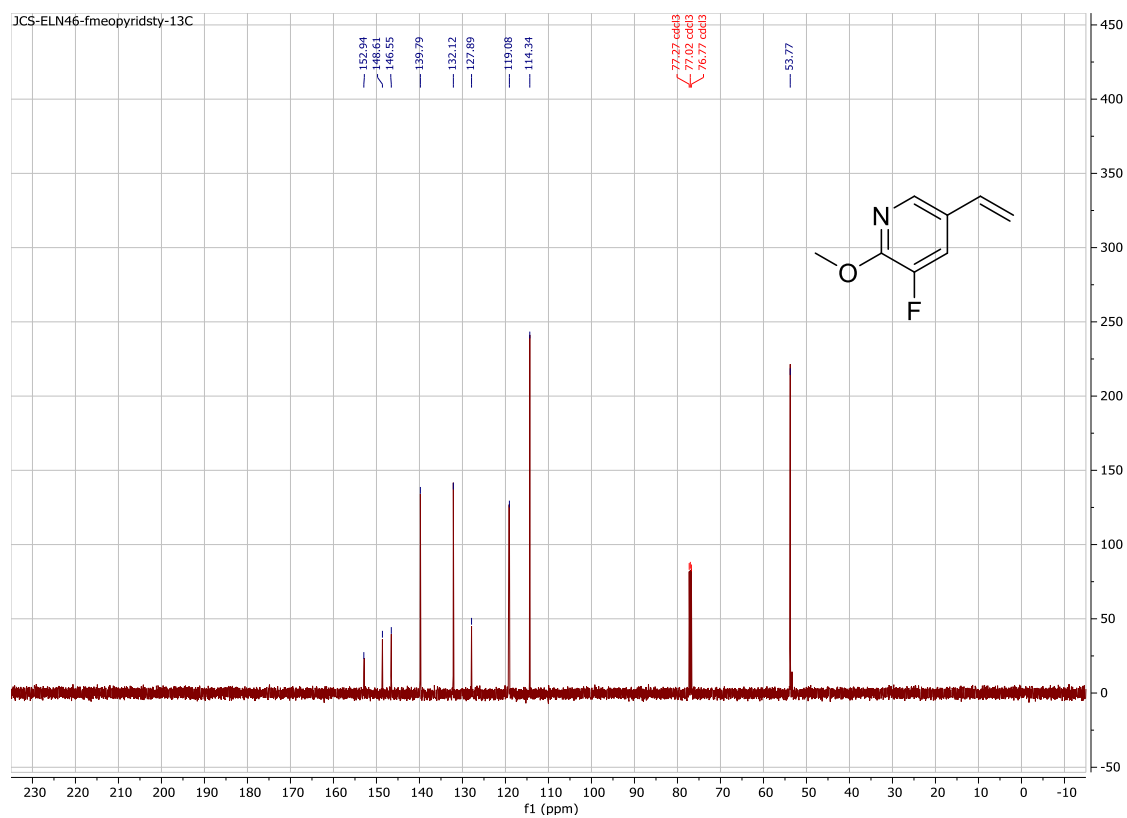

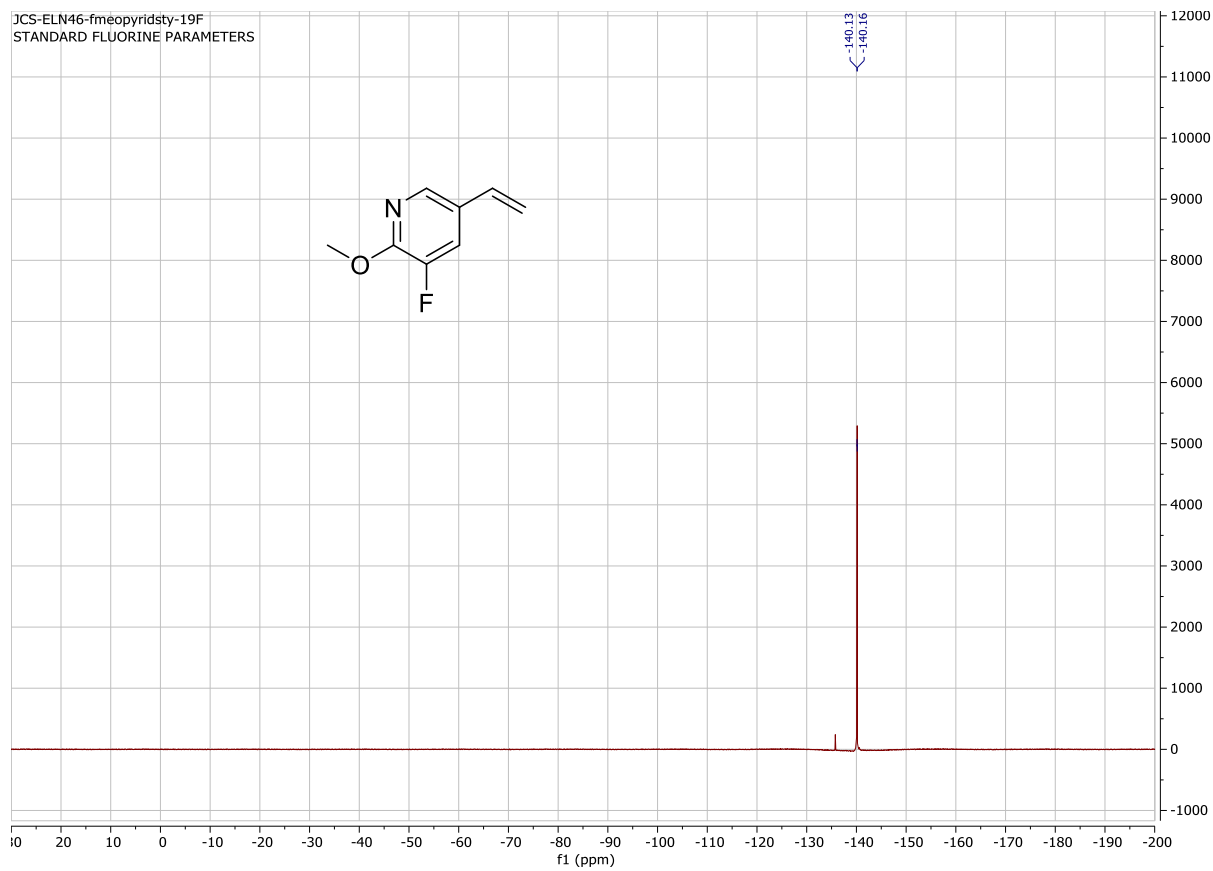

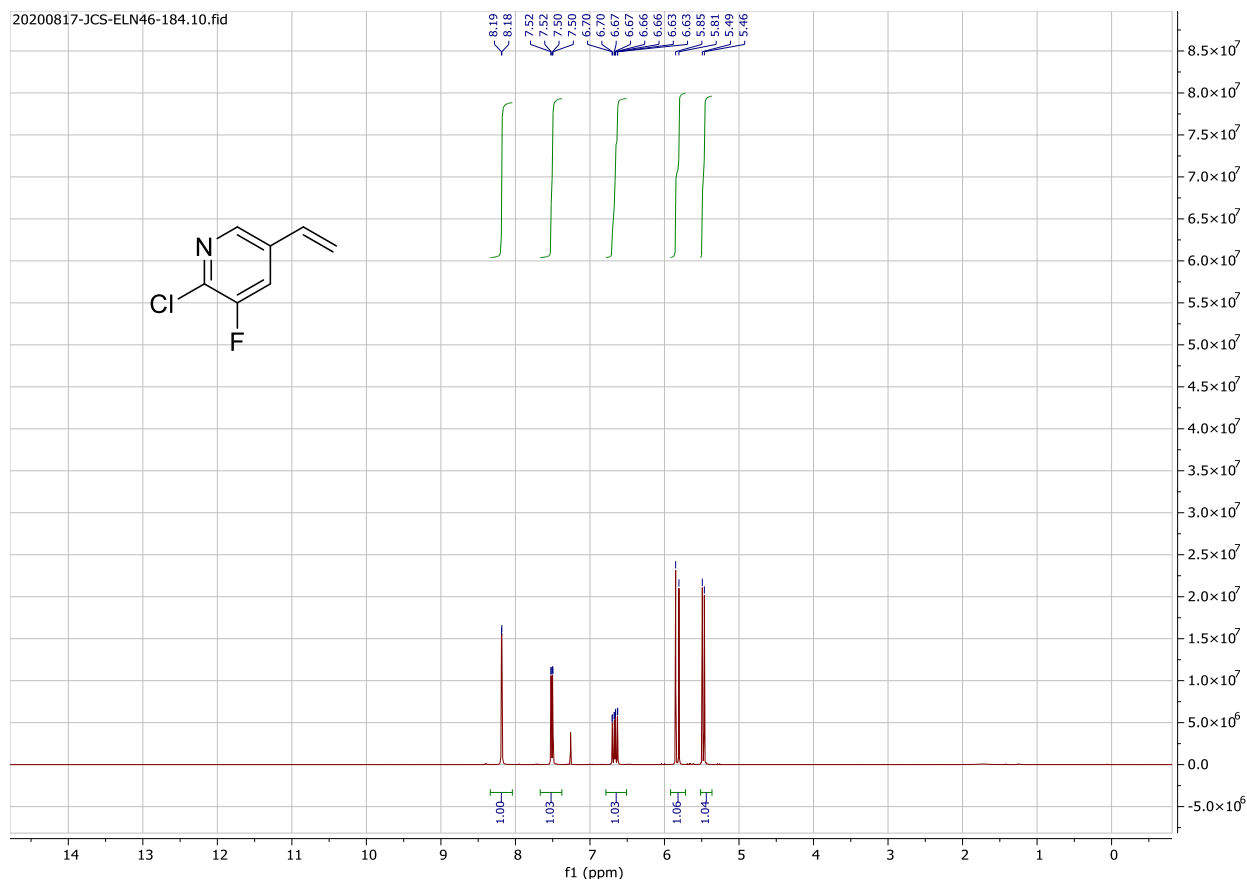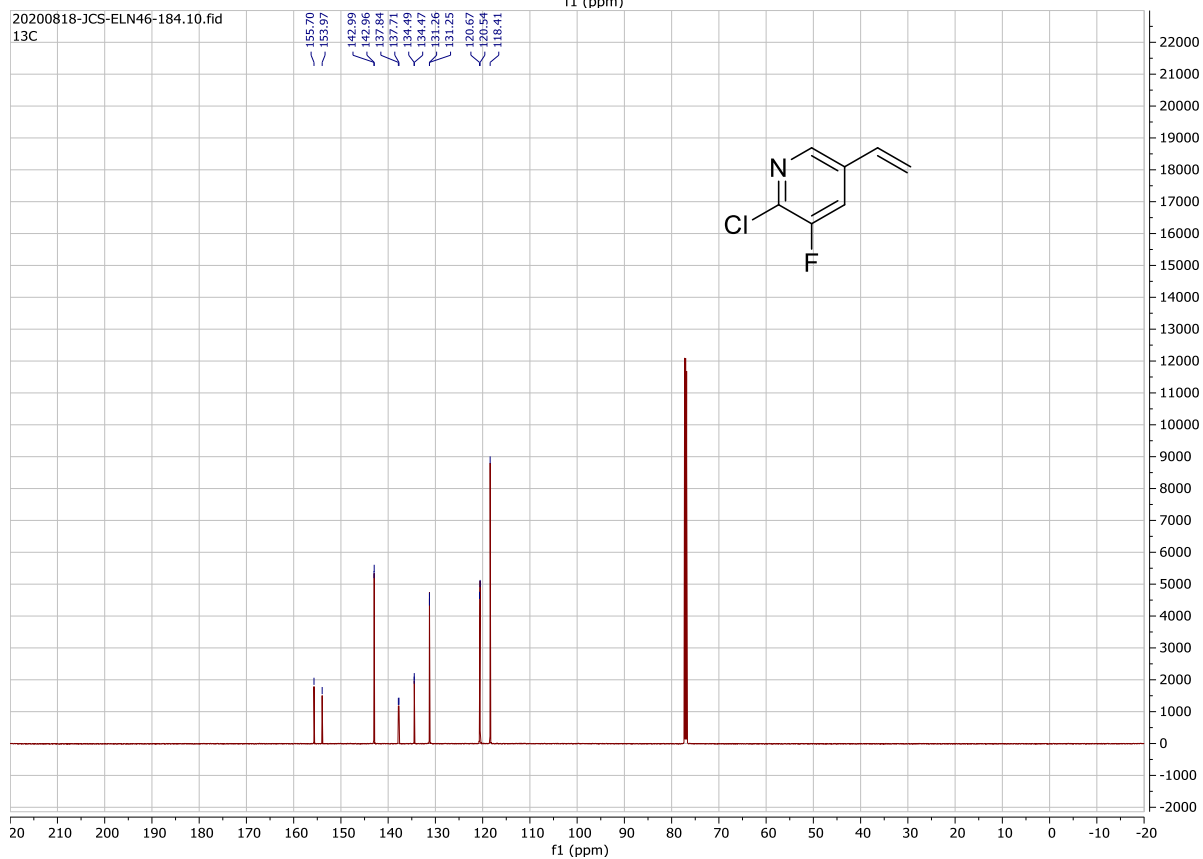

20200827-JCS-ELN46-184.10.fid

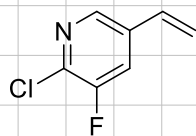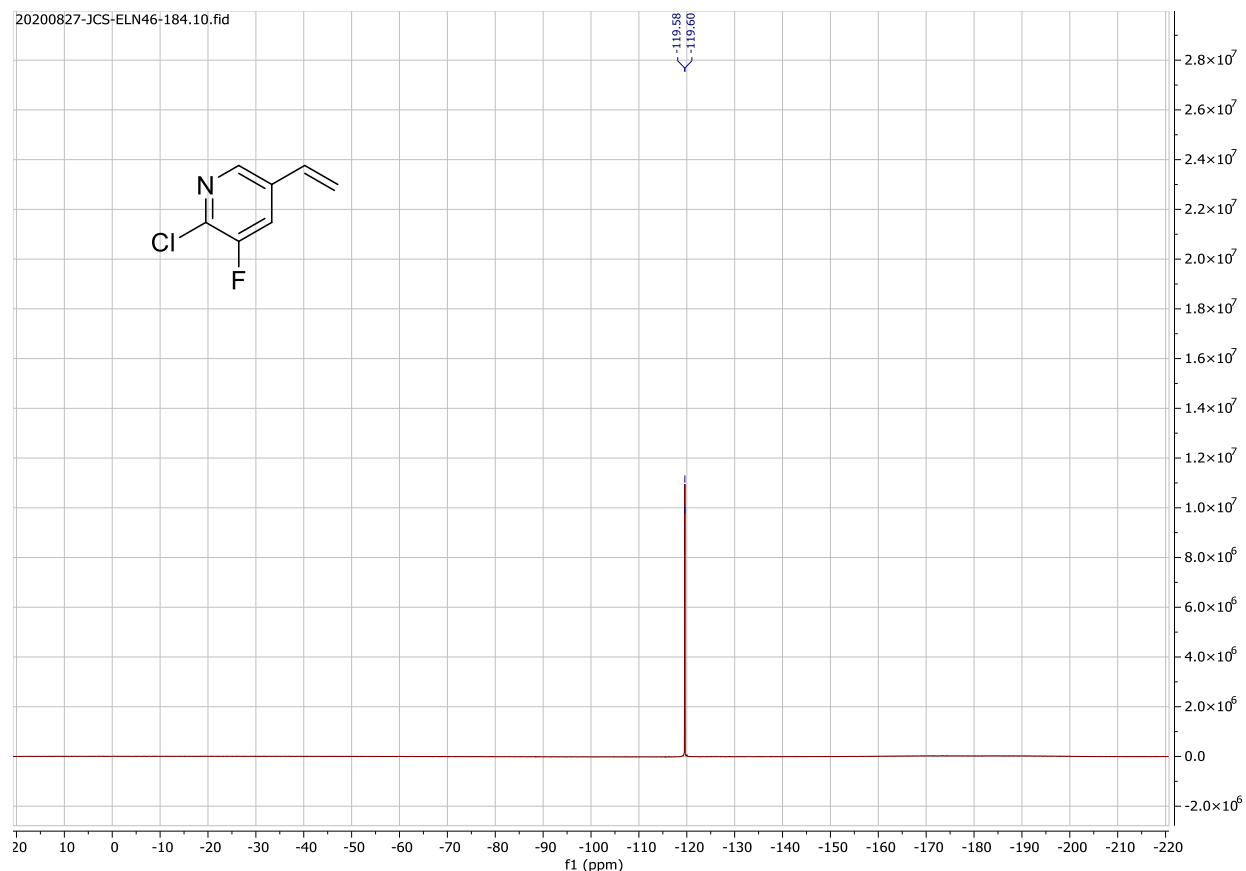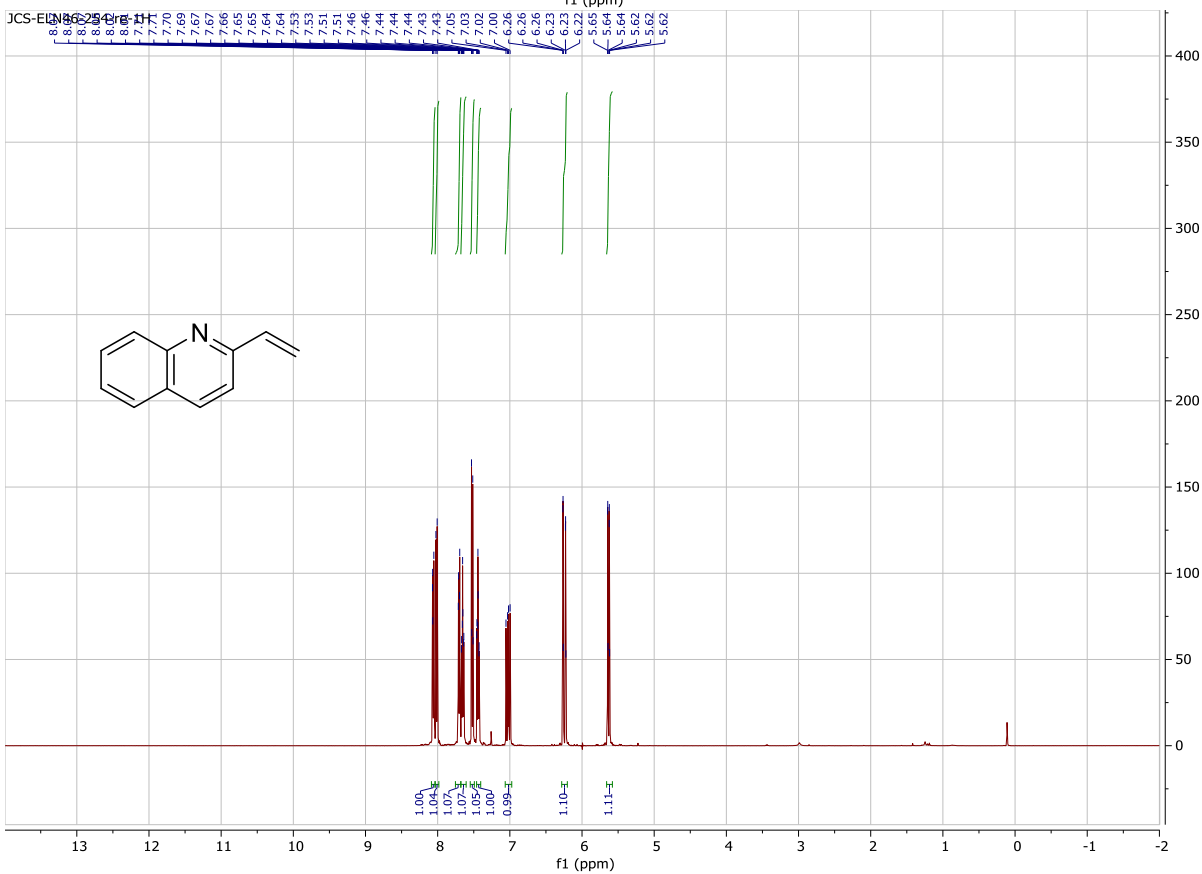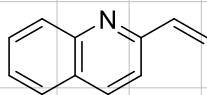

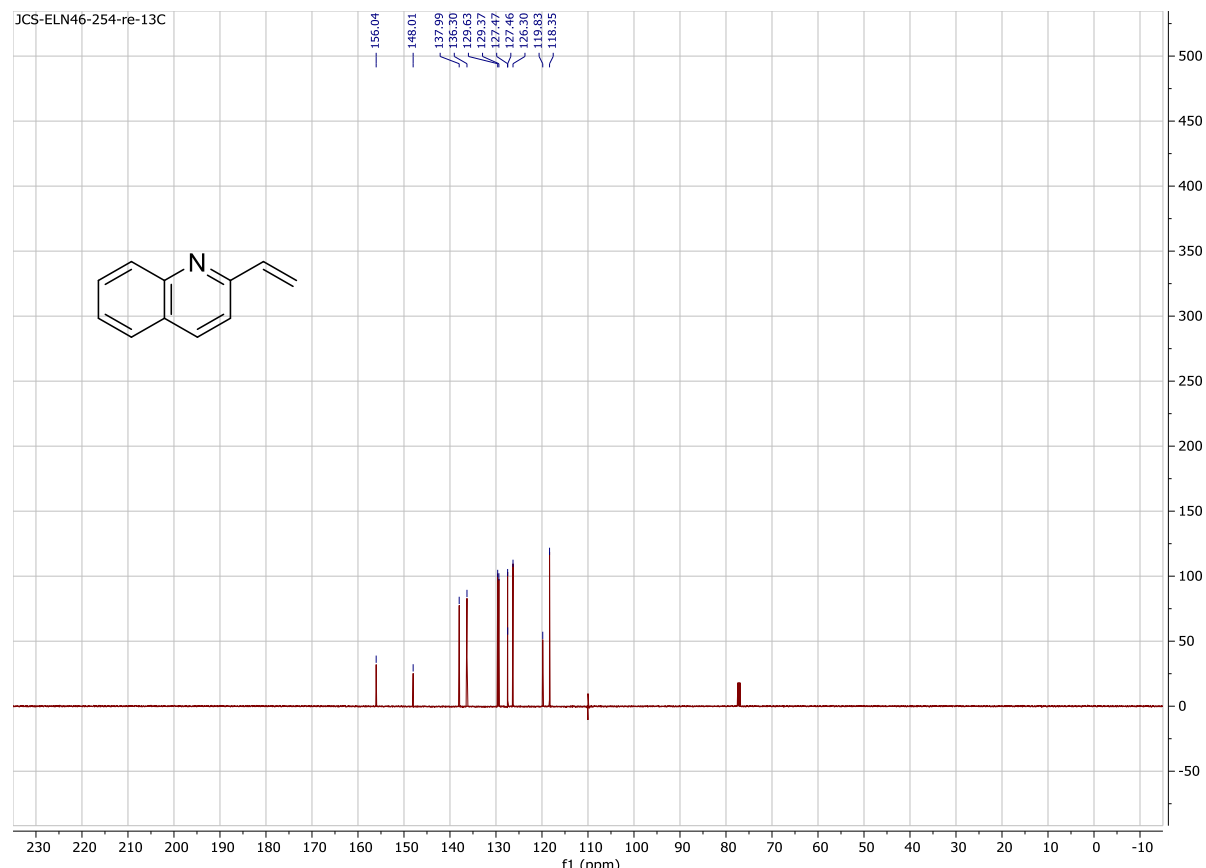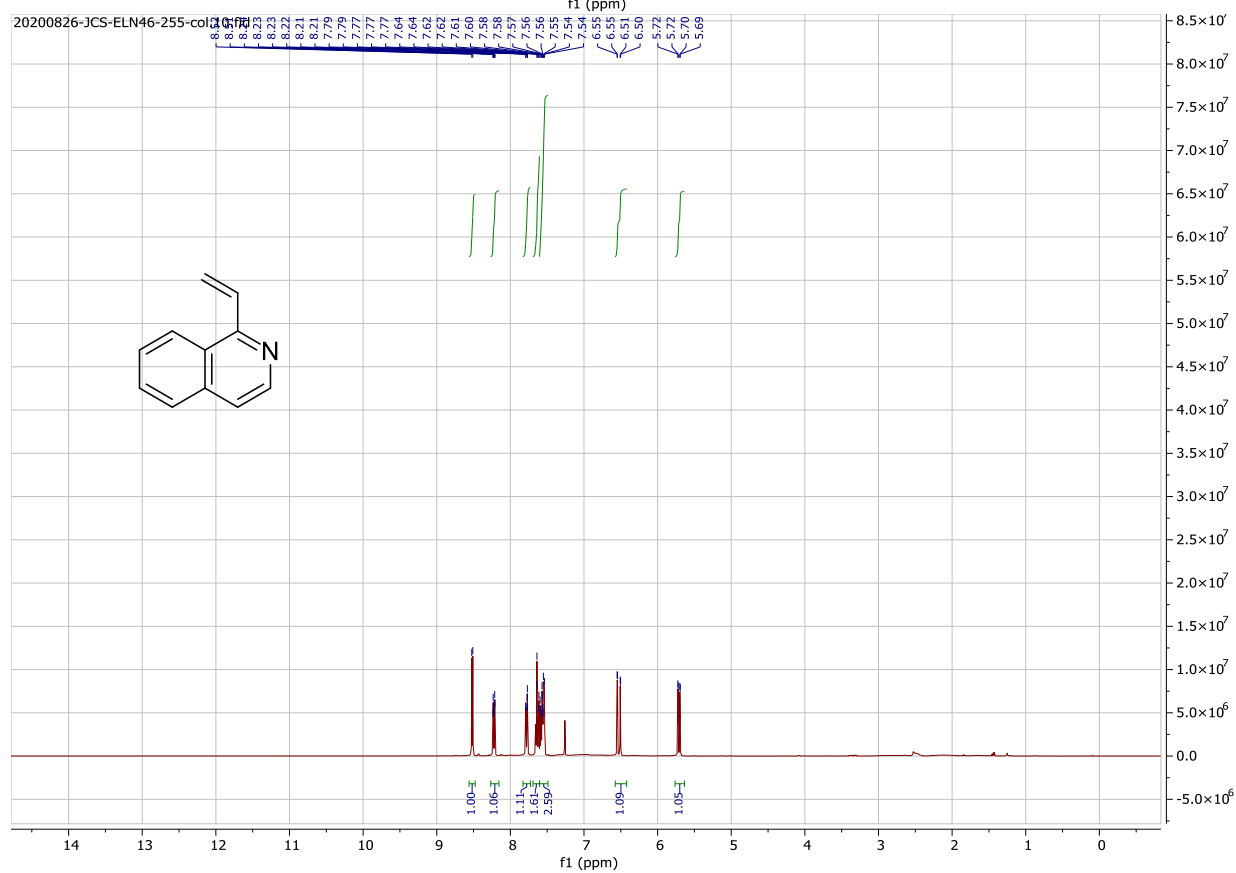

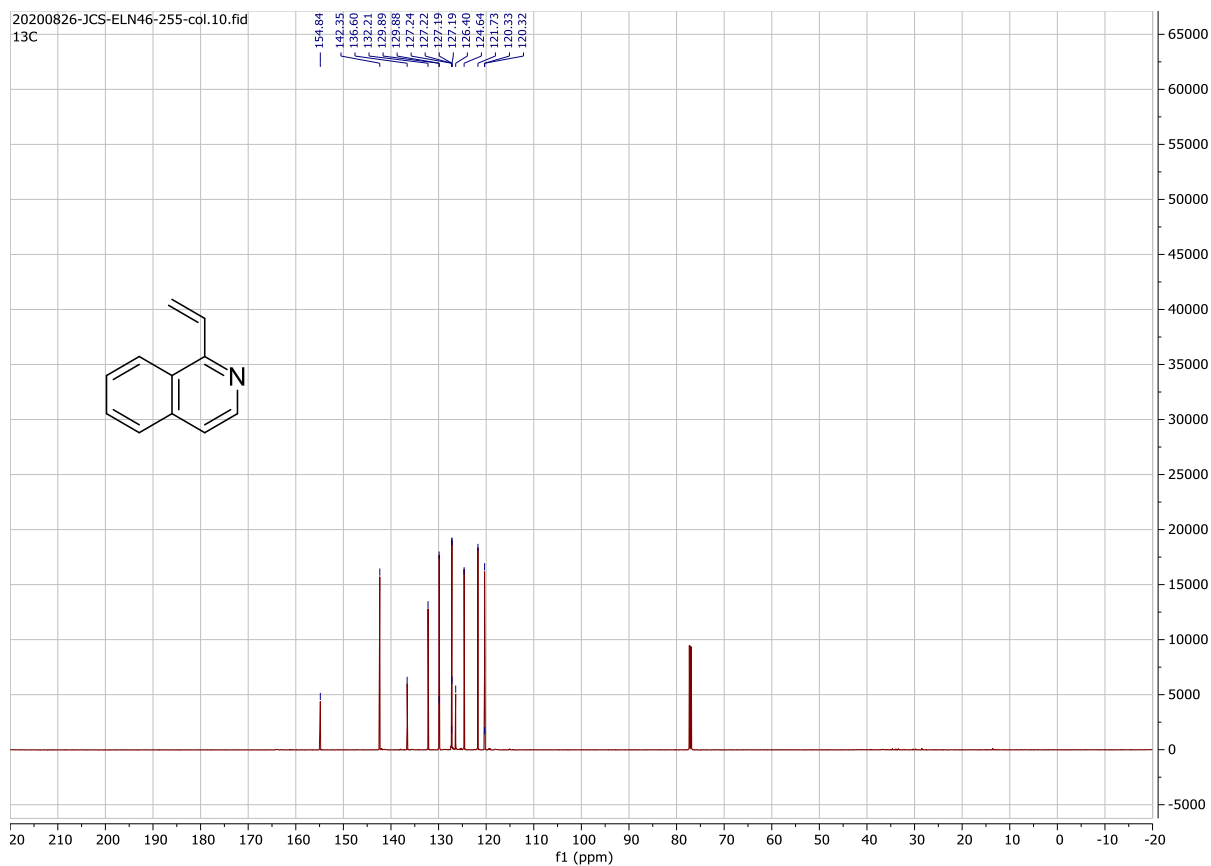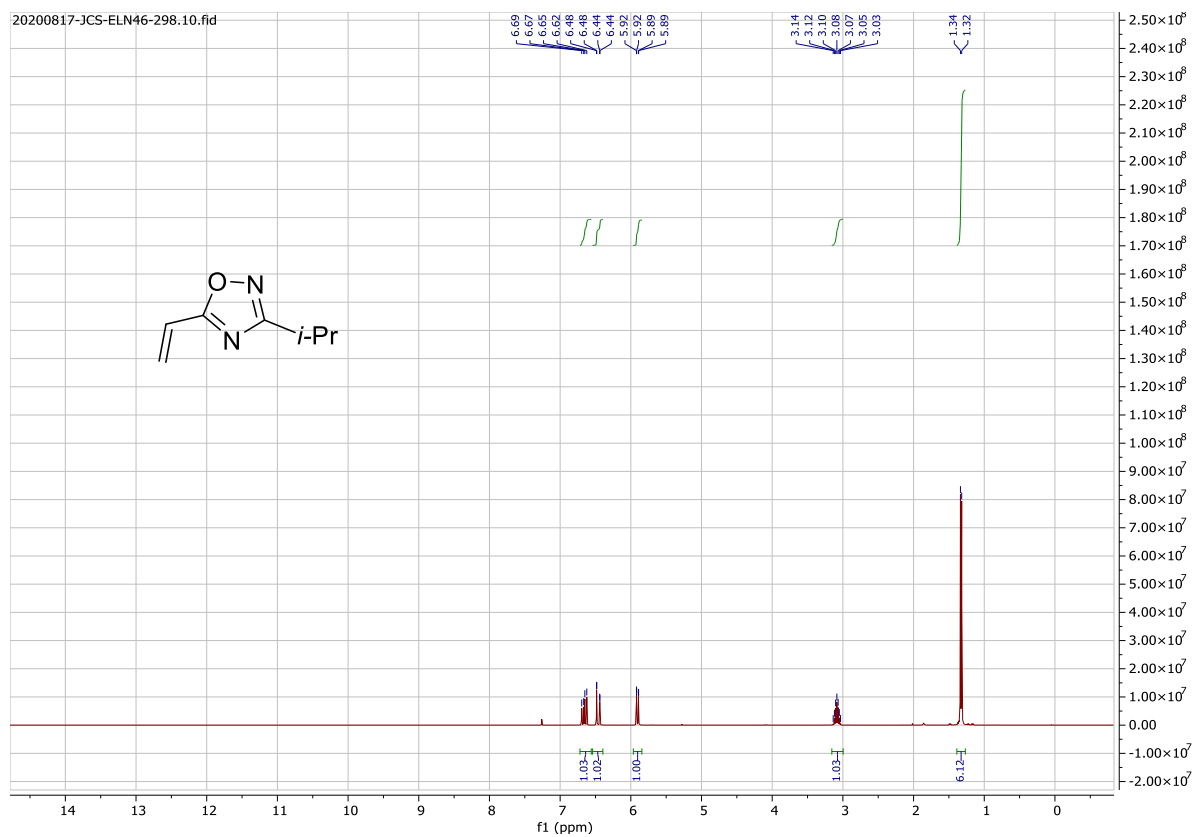

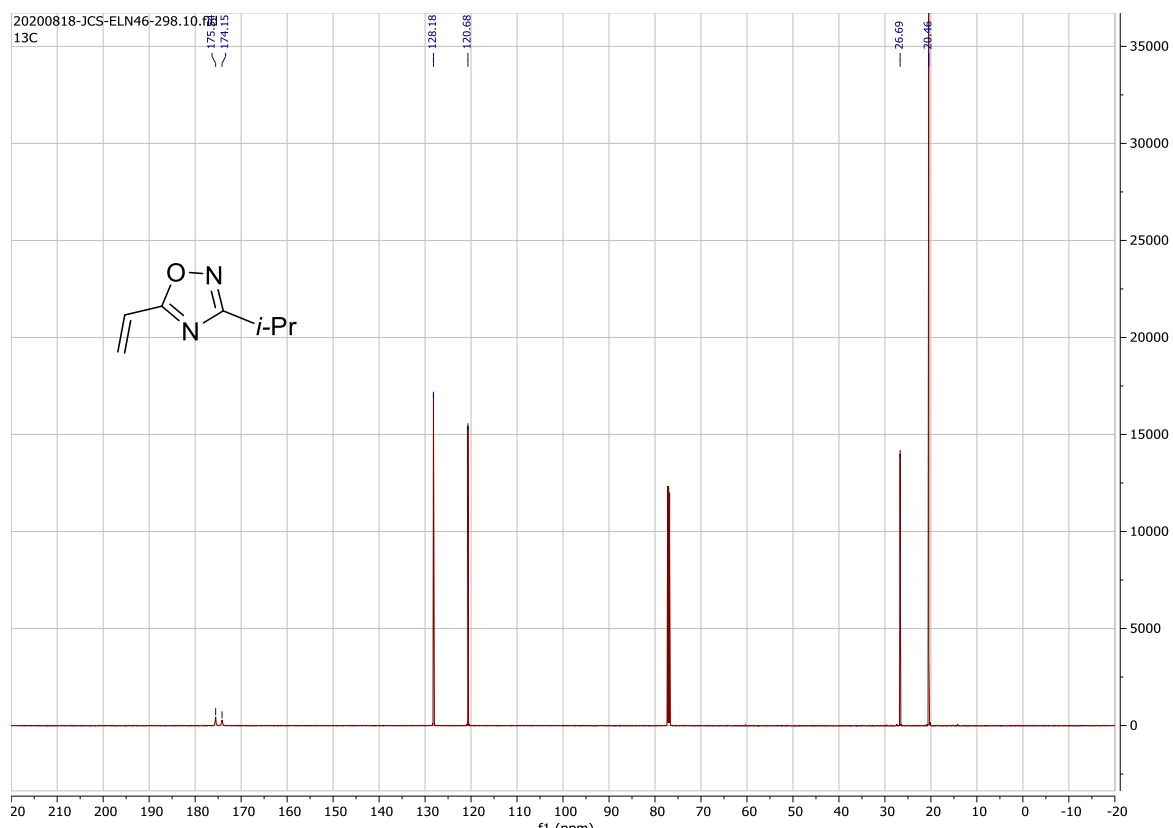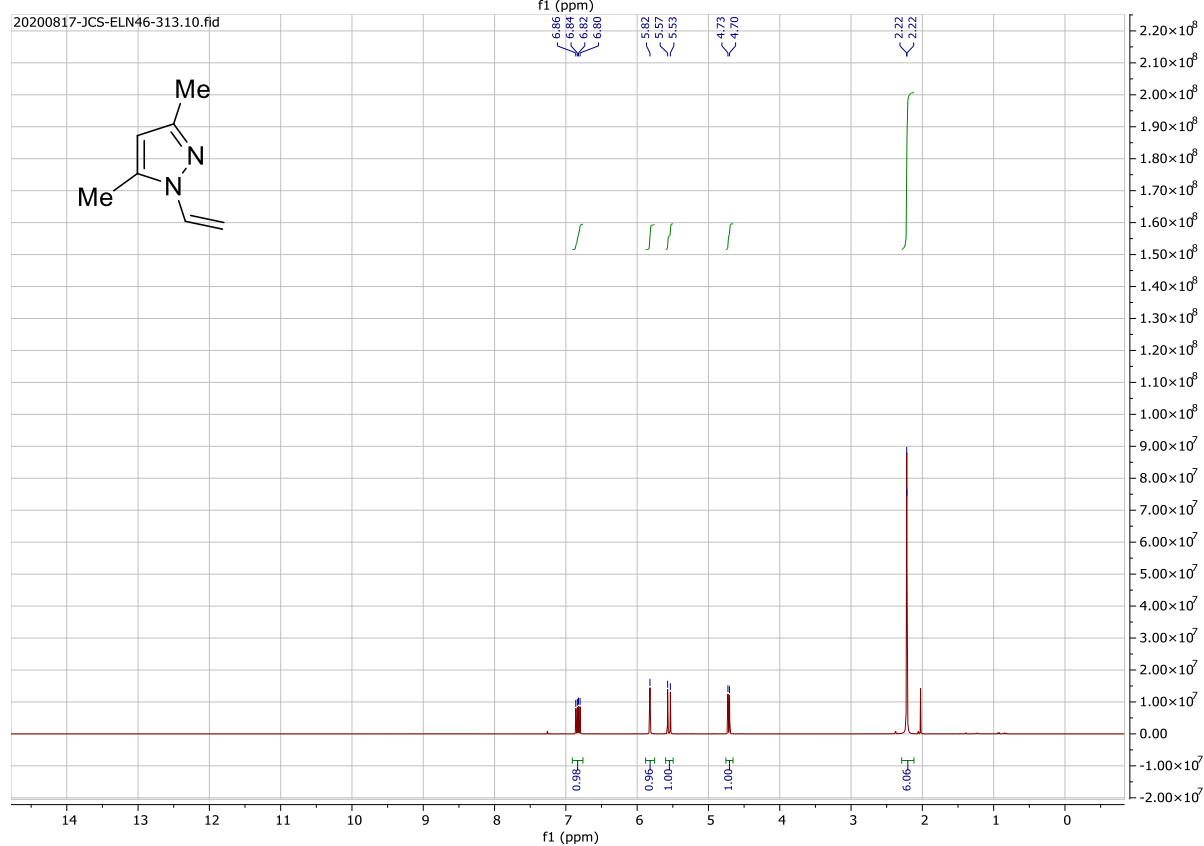

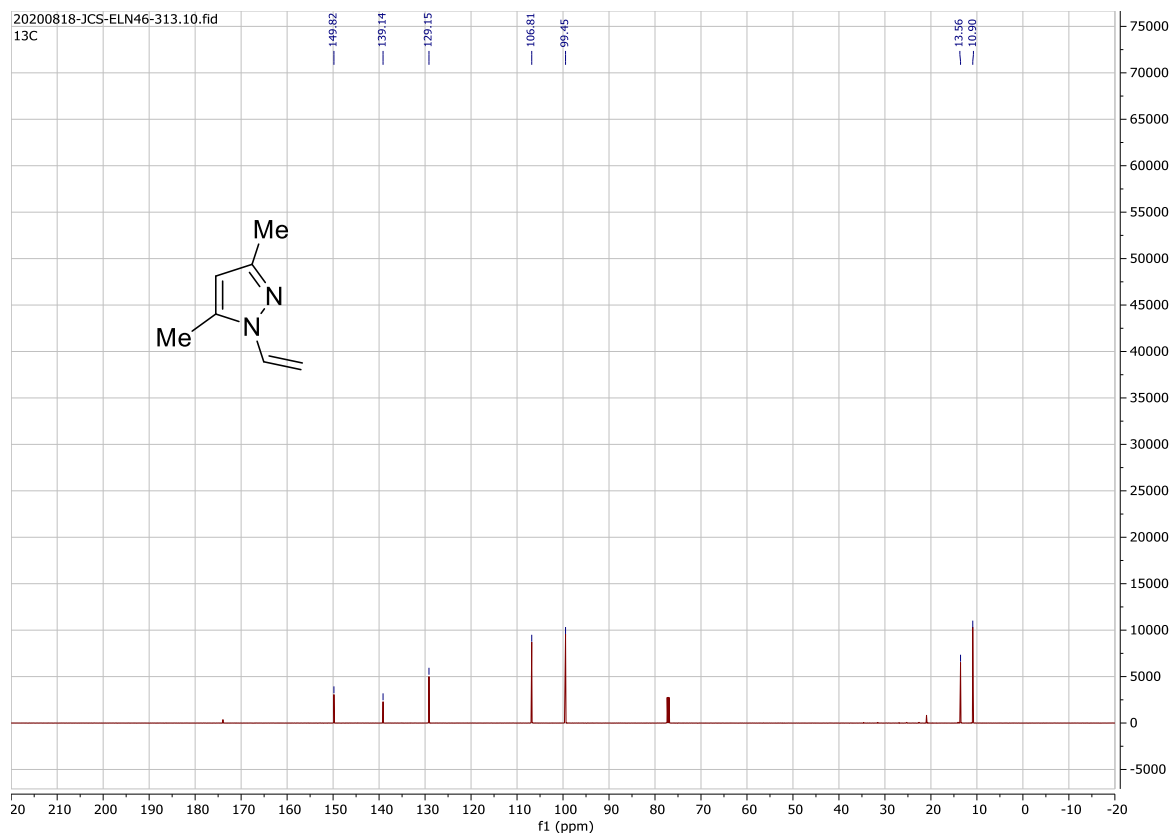

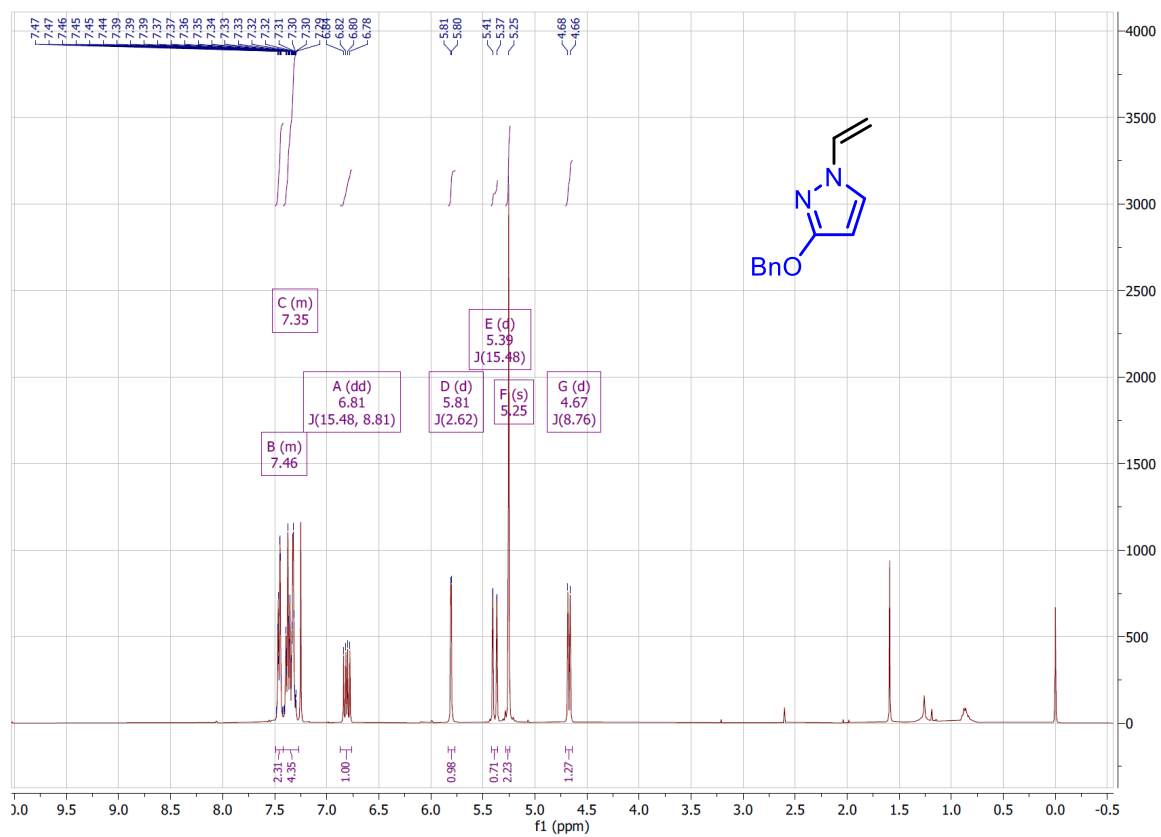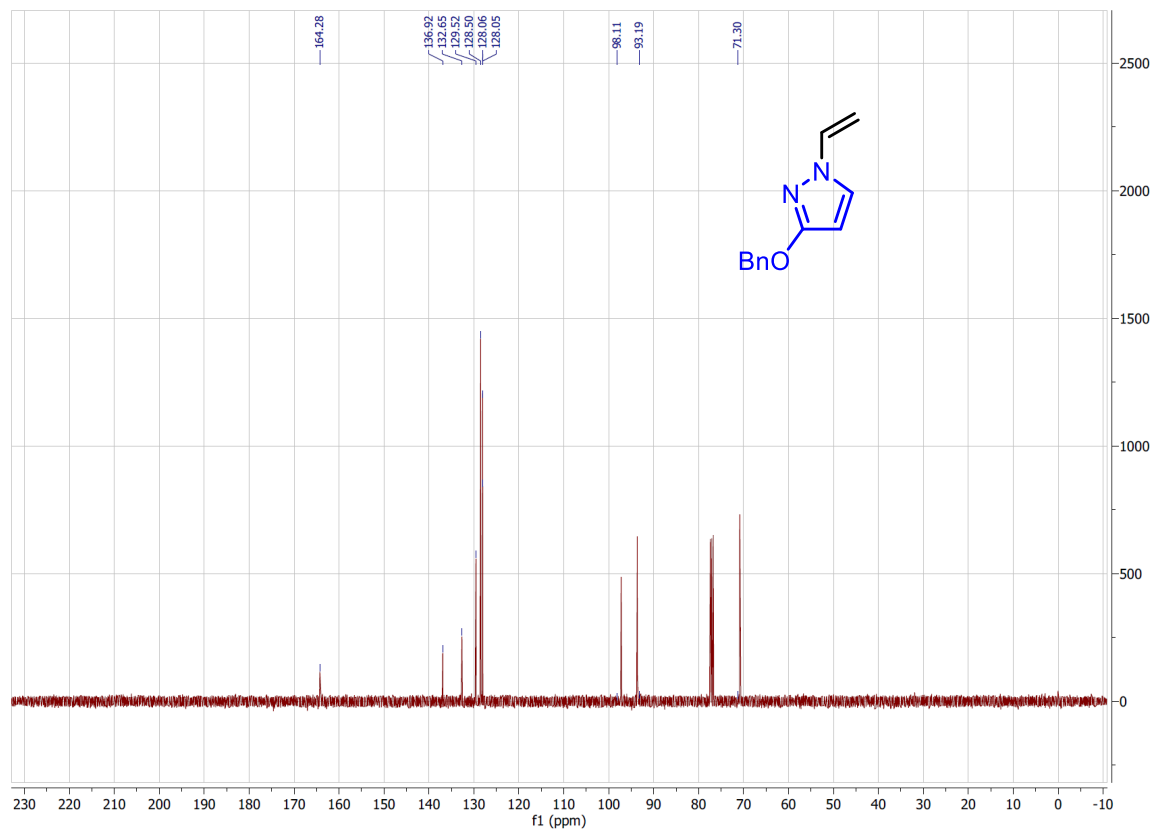

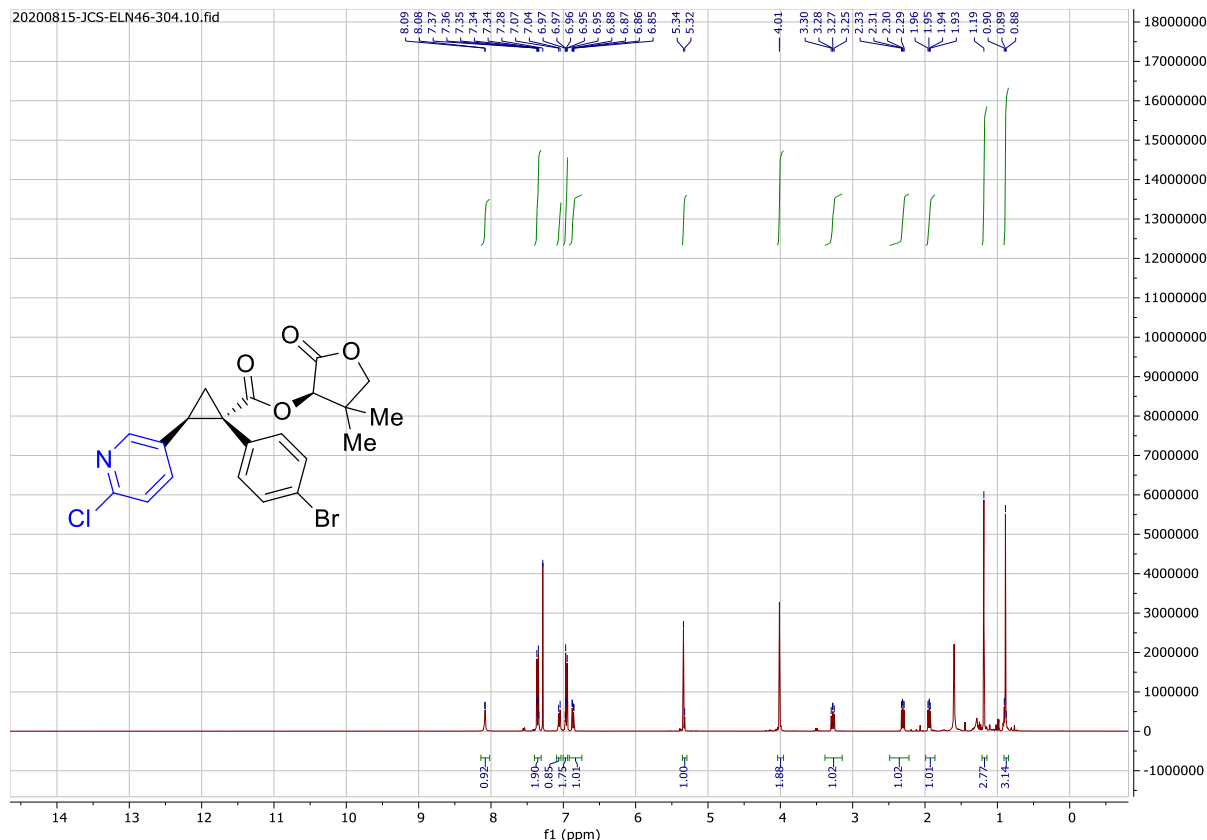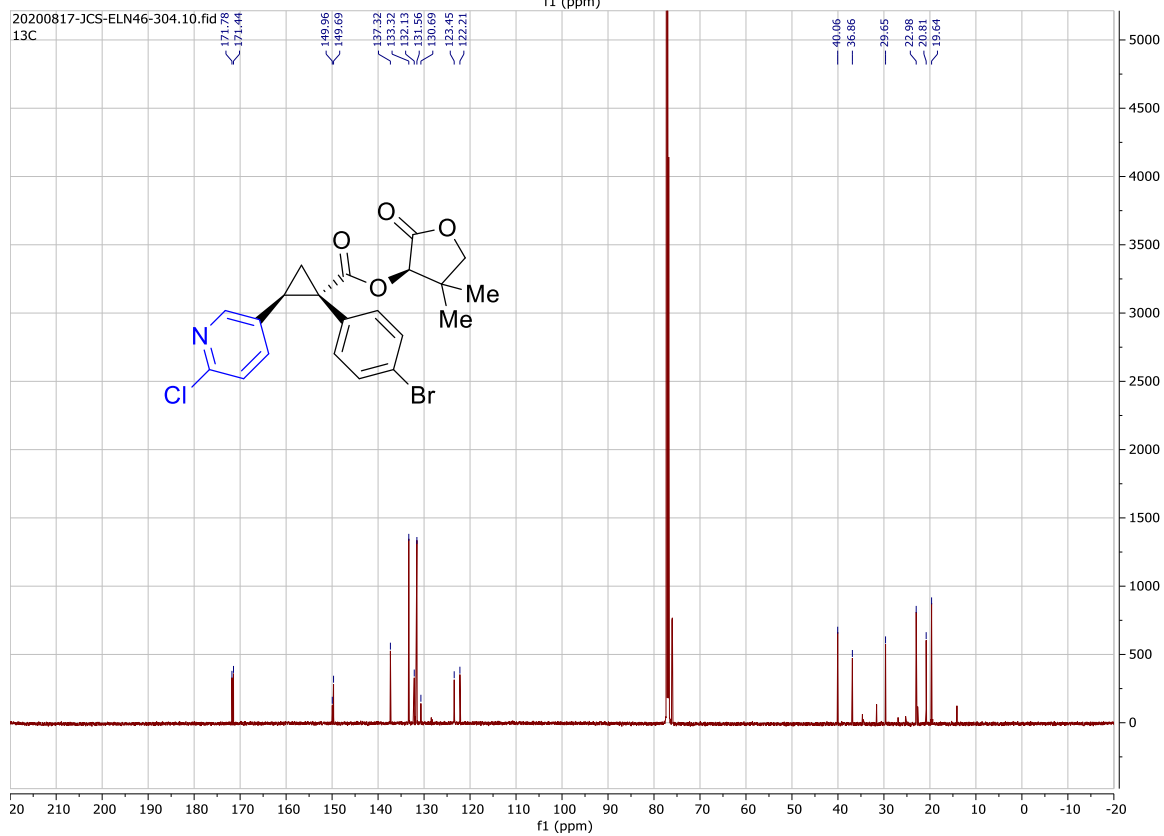

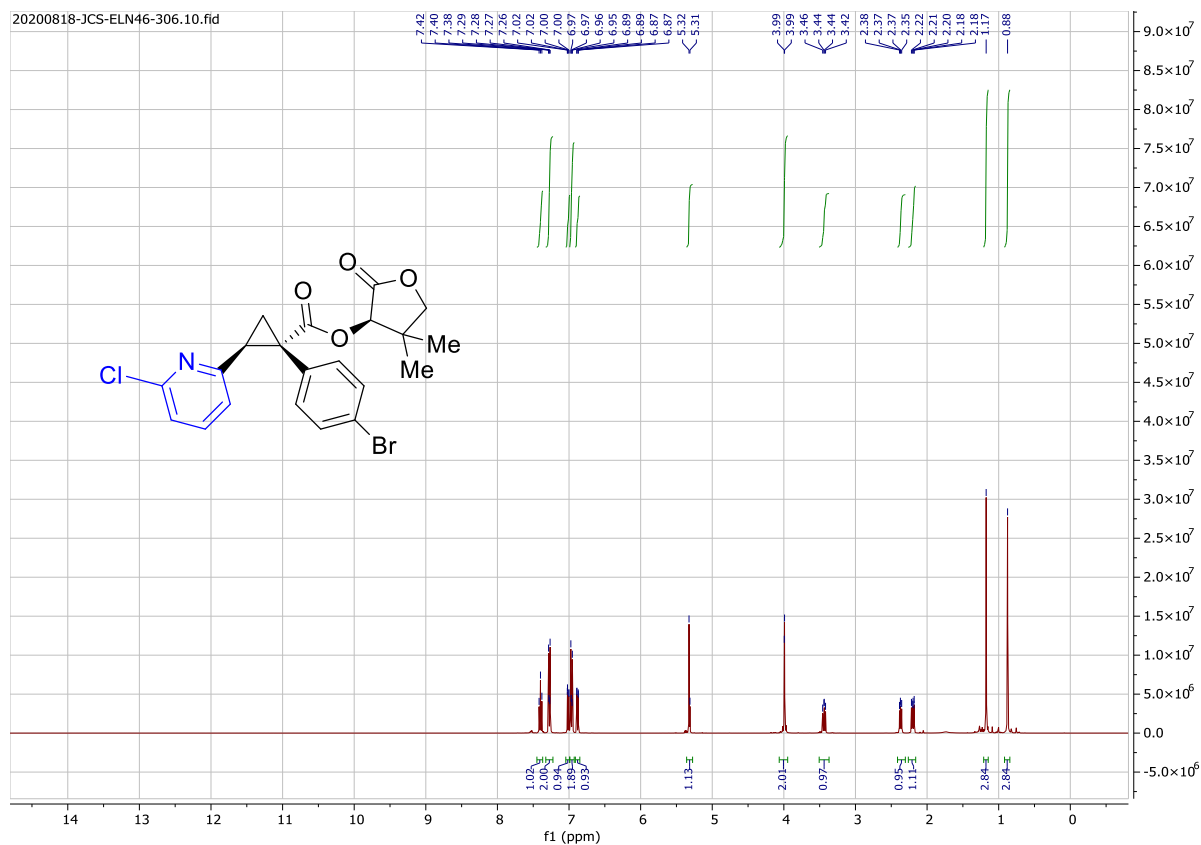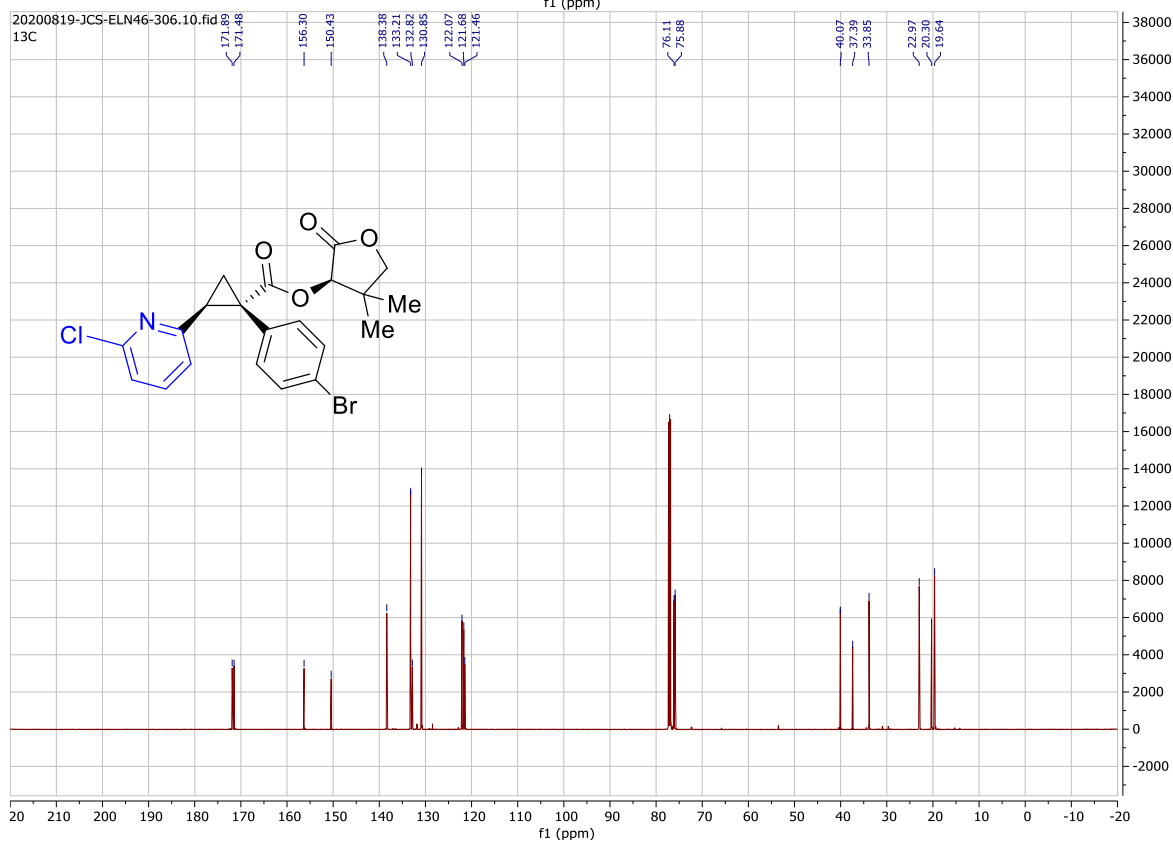

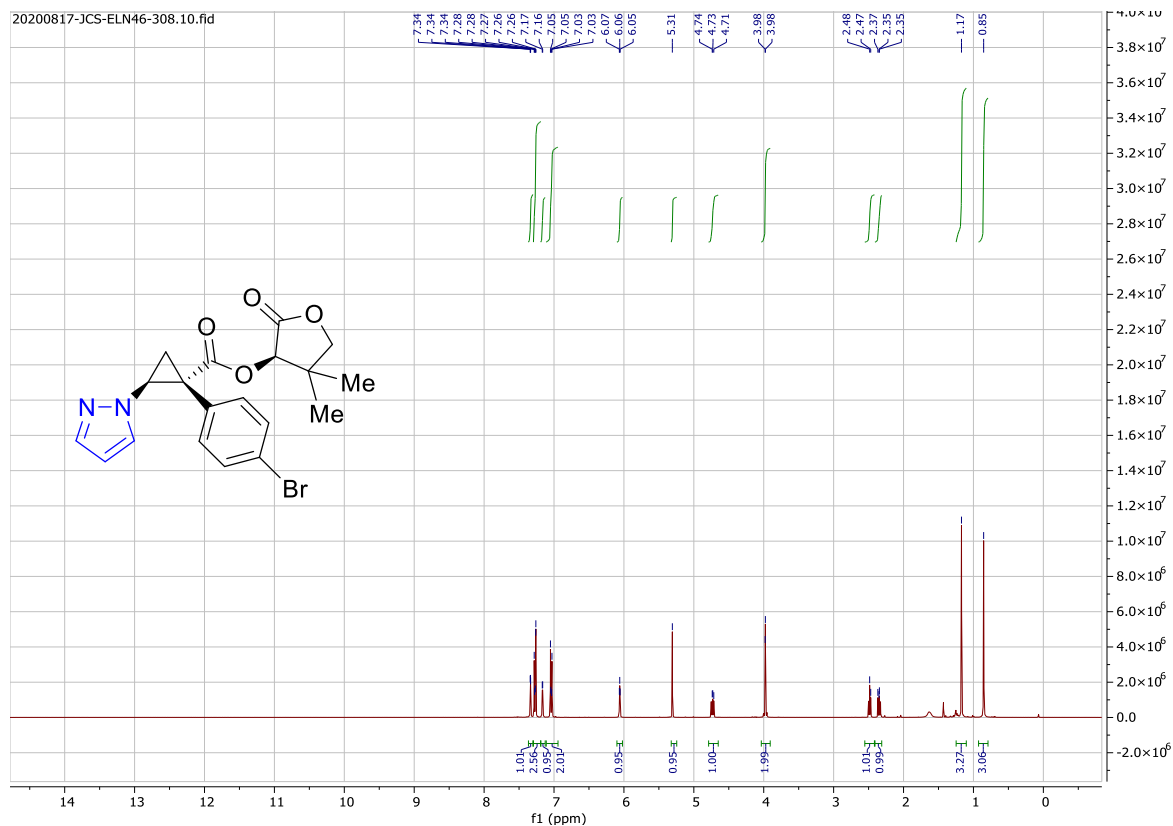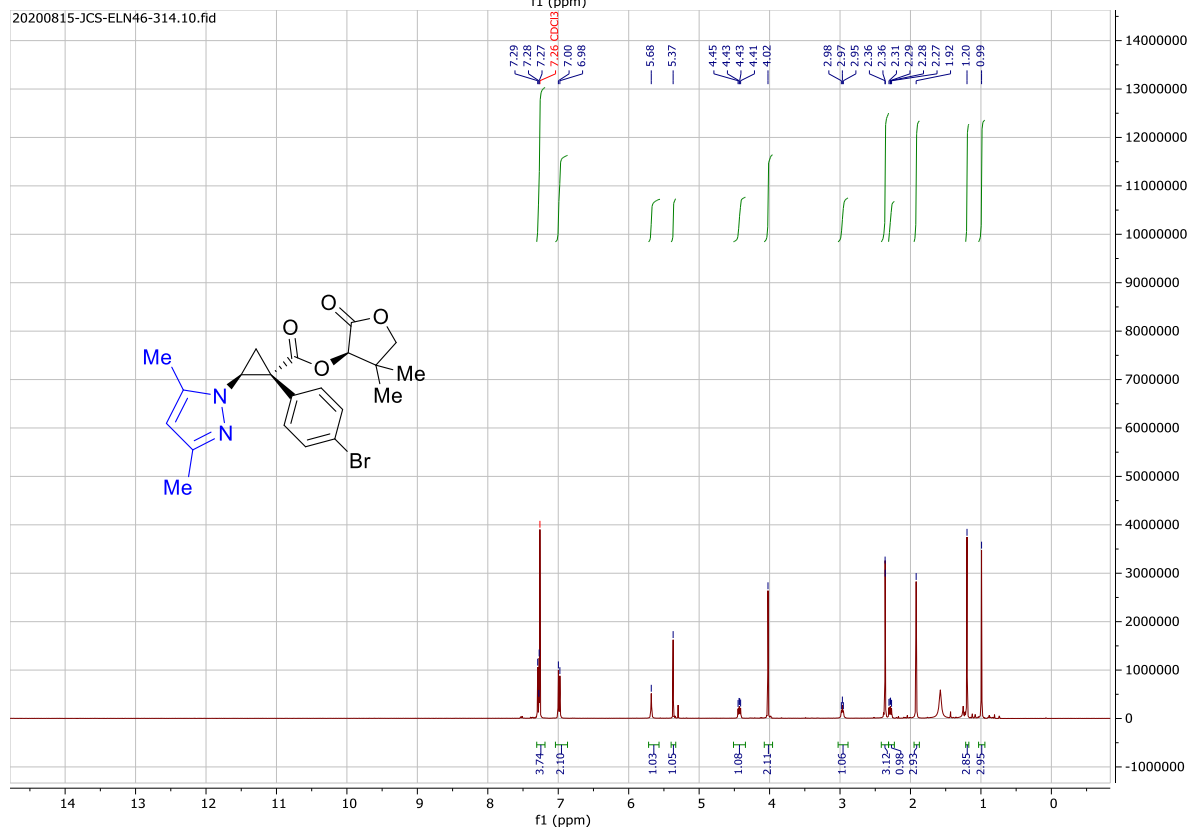

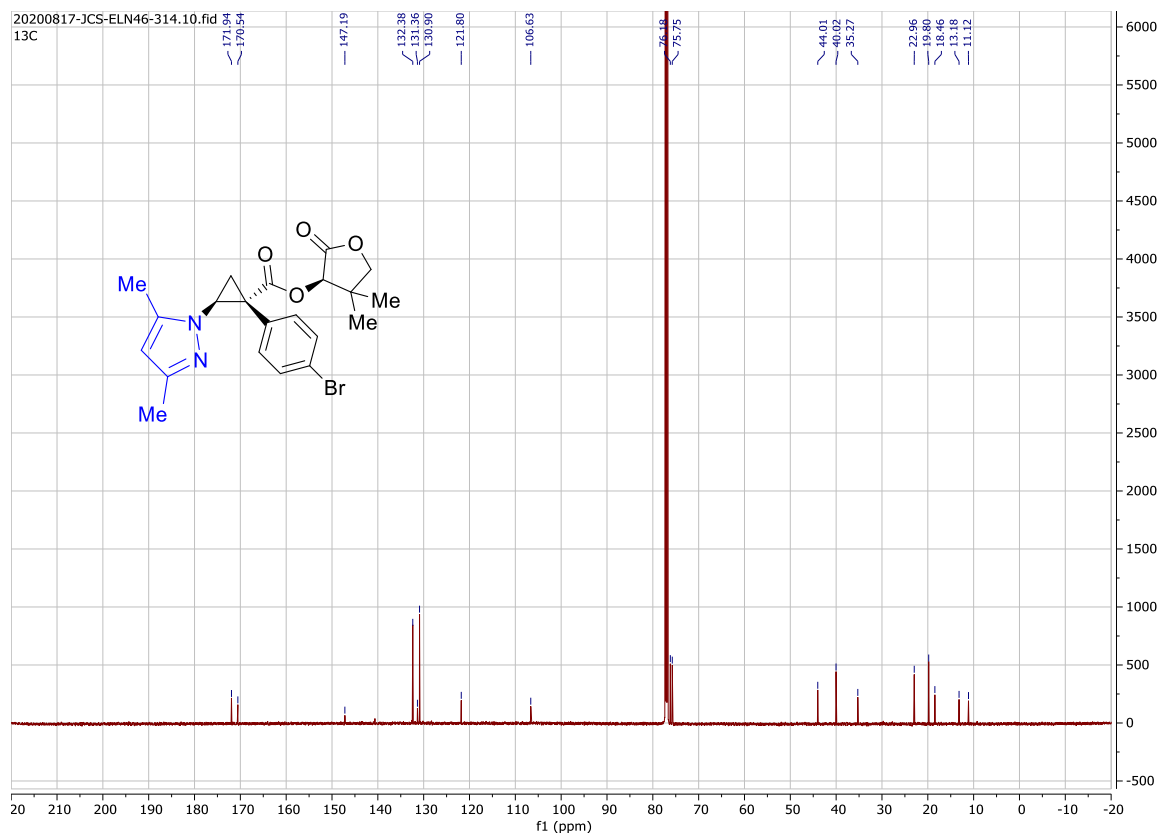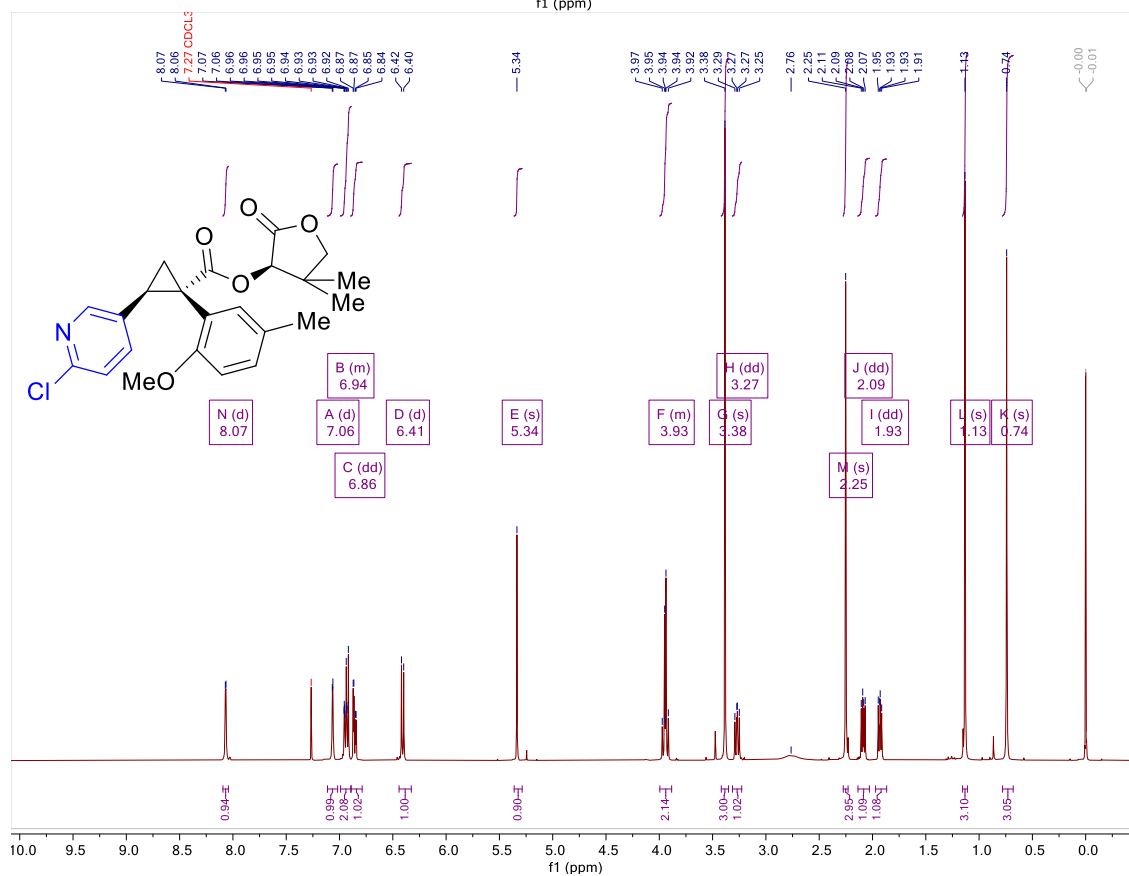

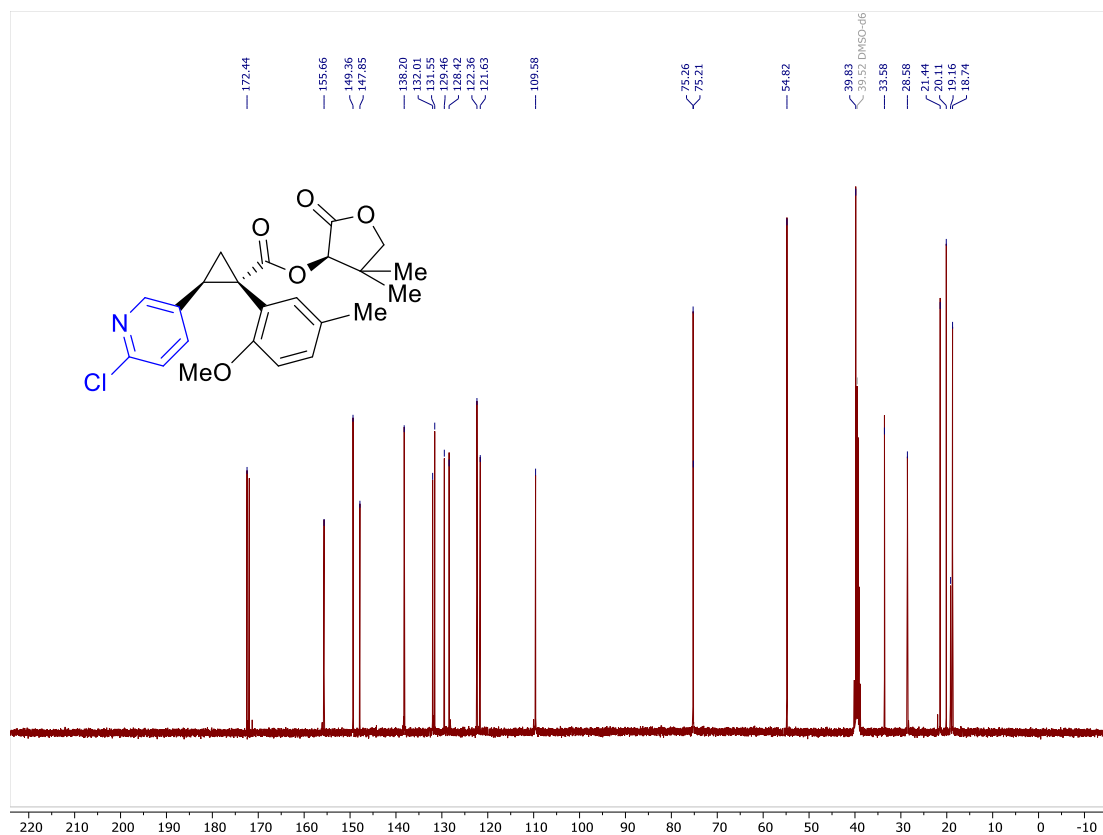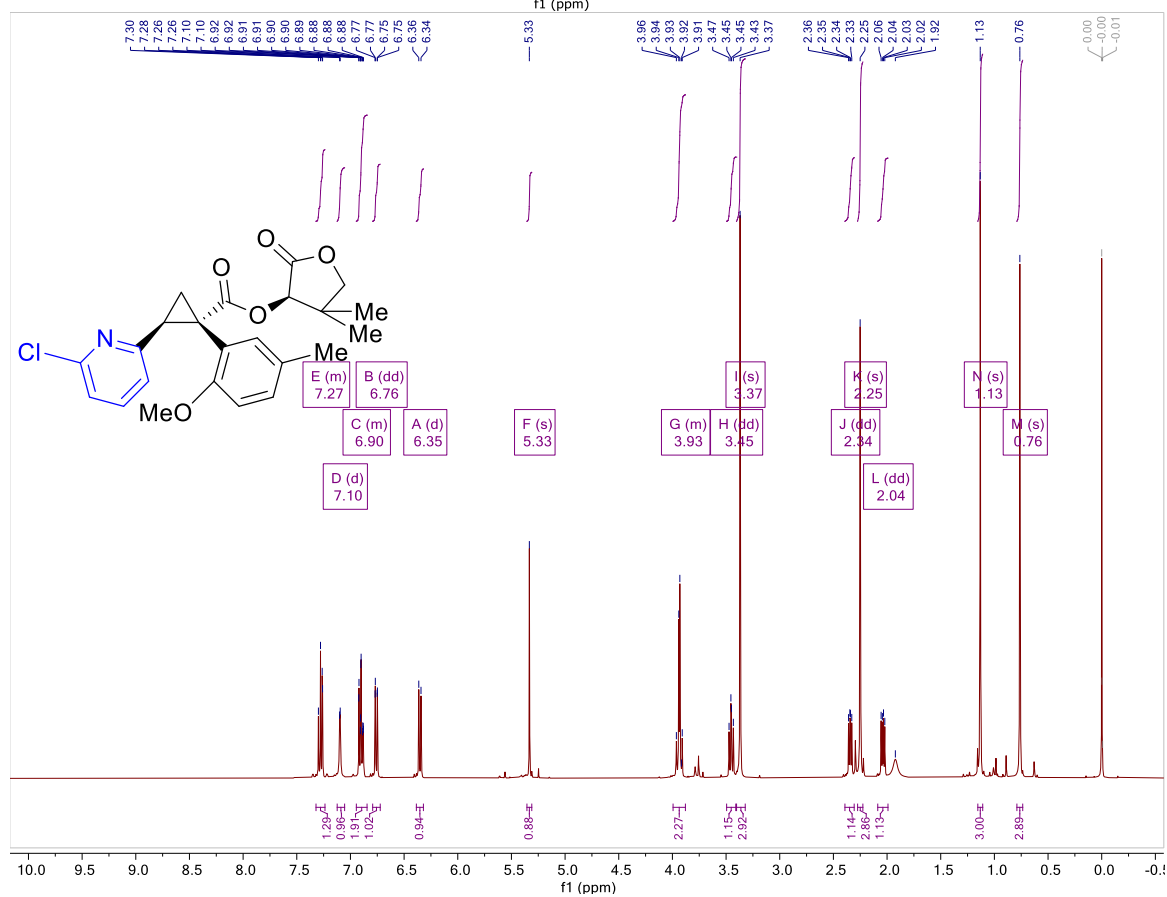

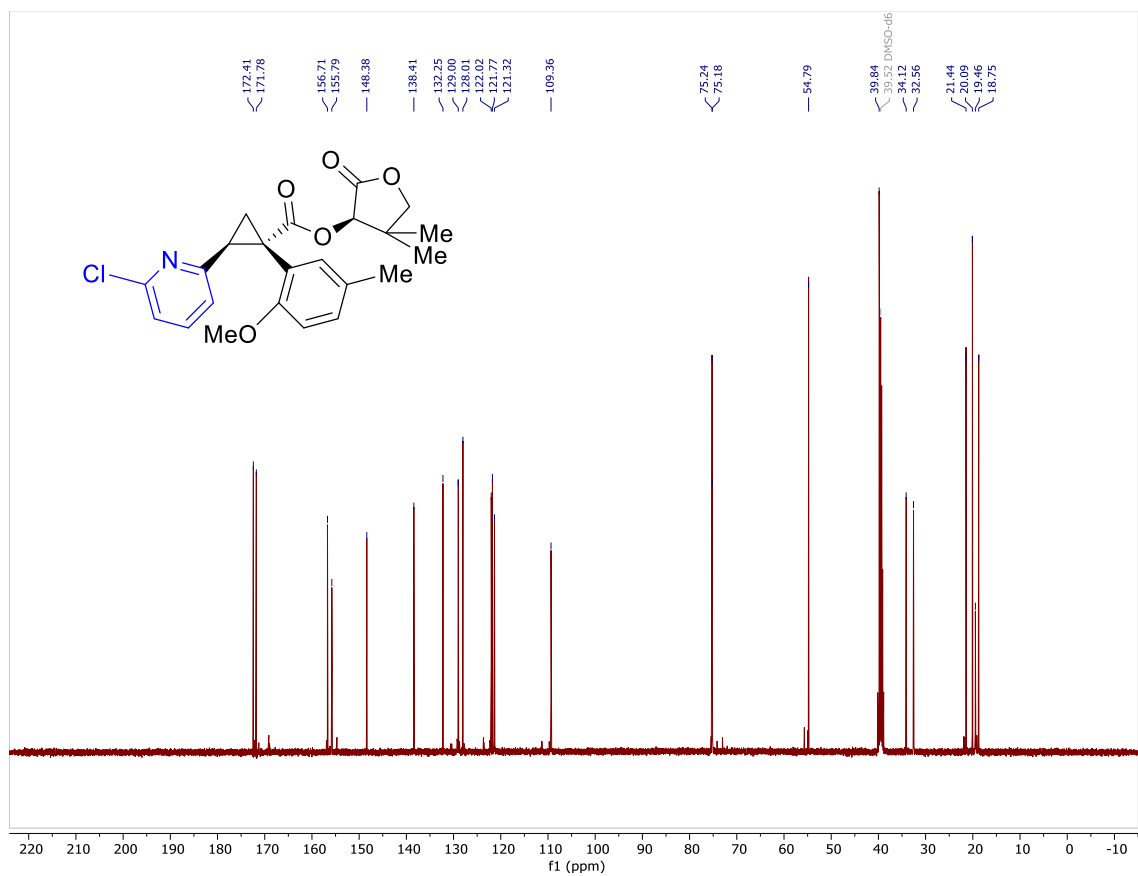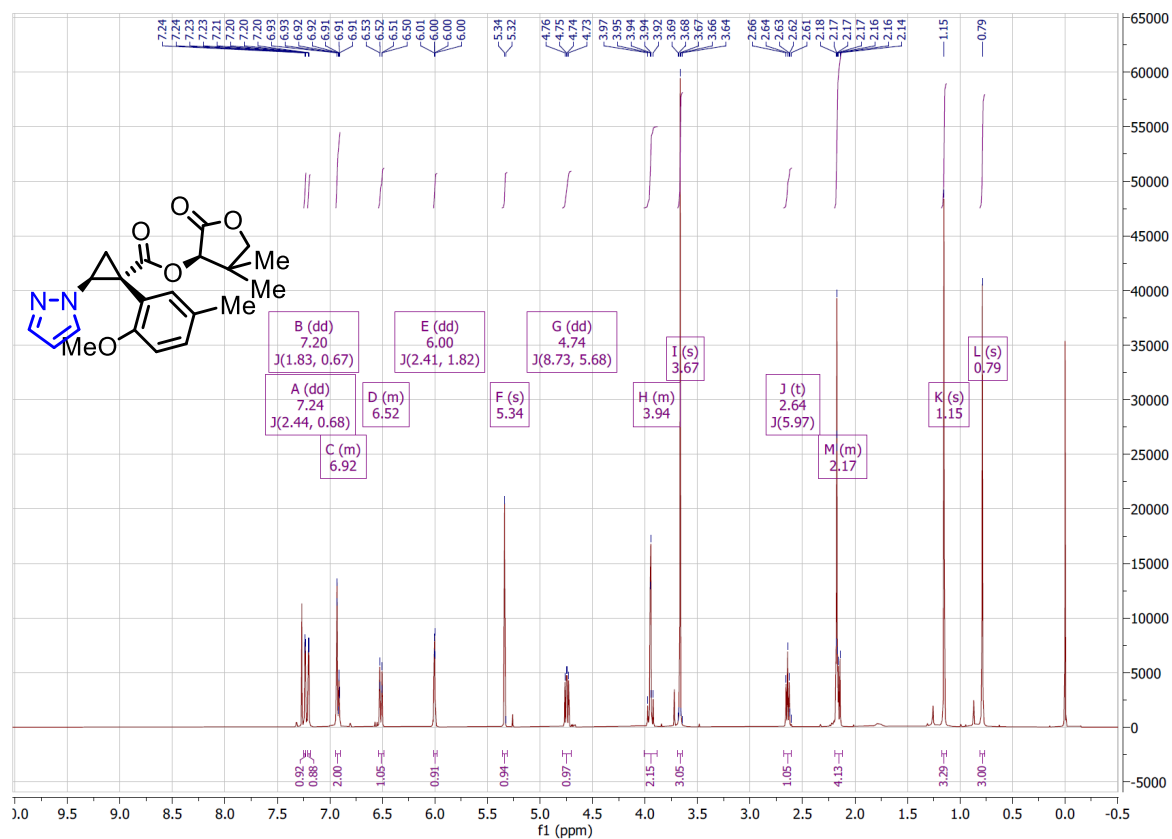

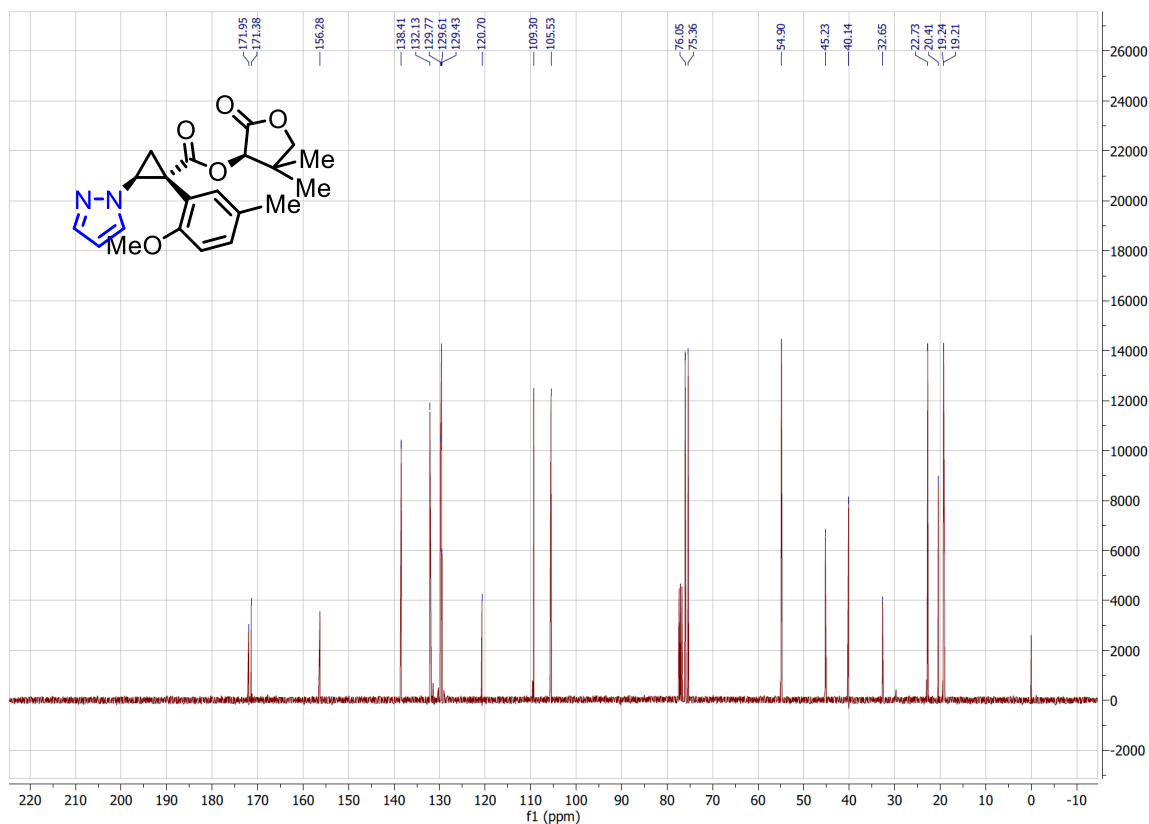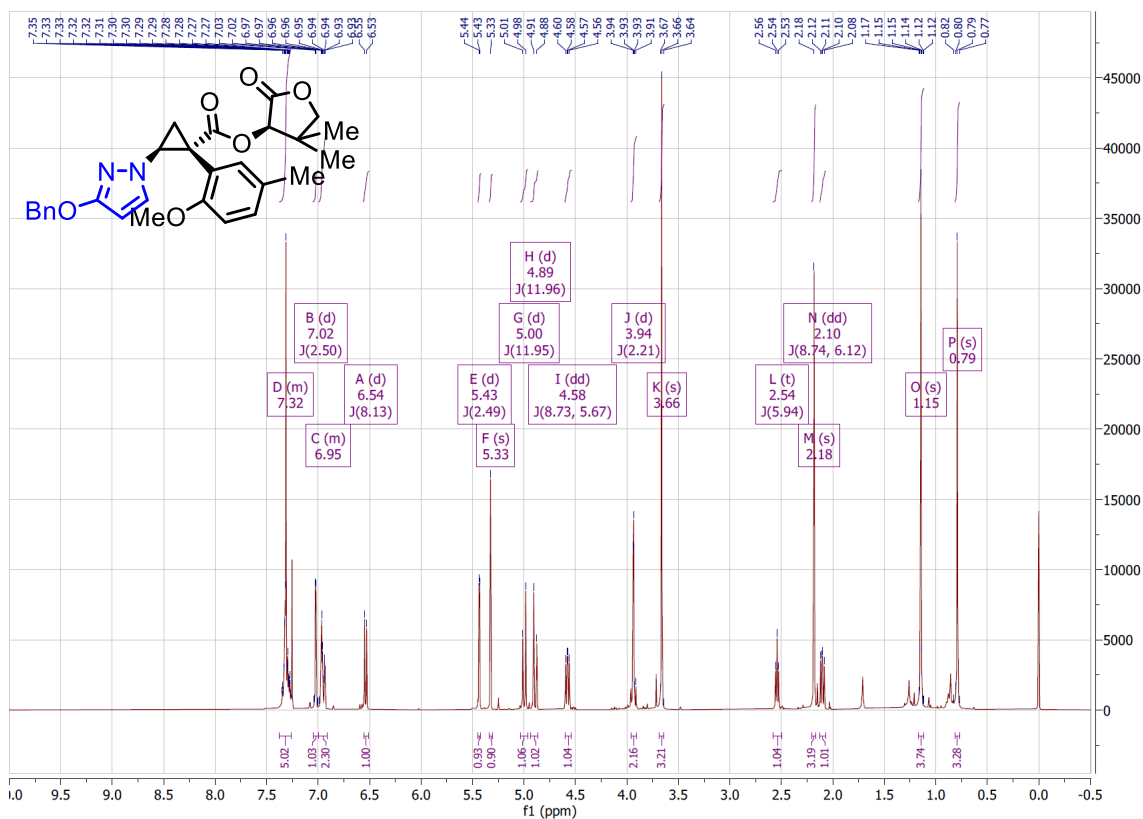

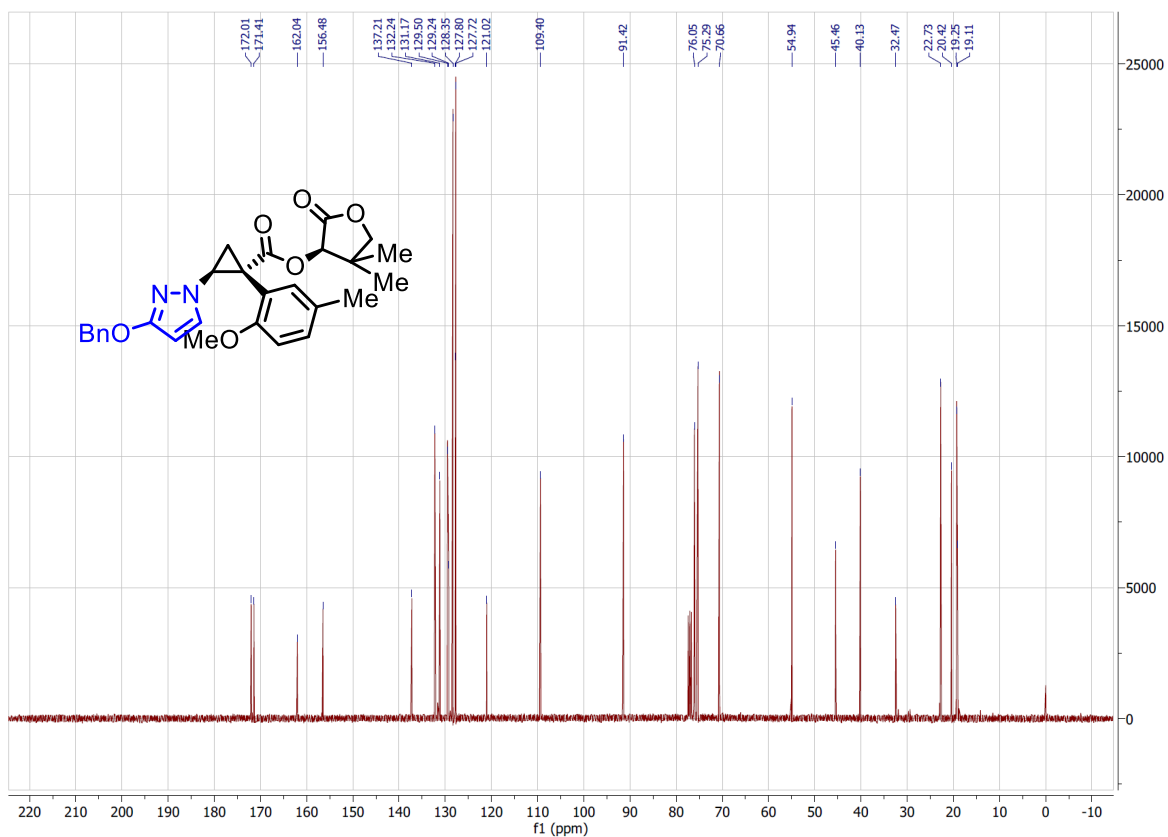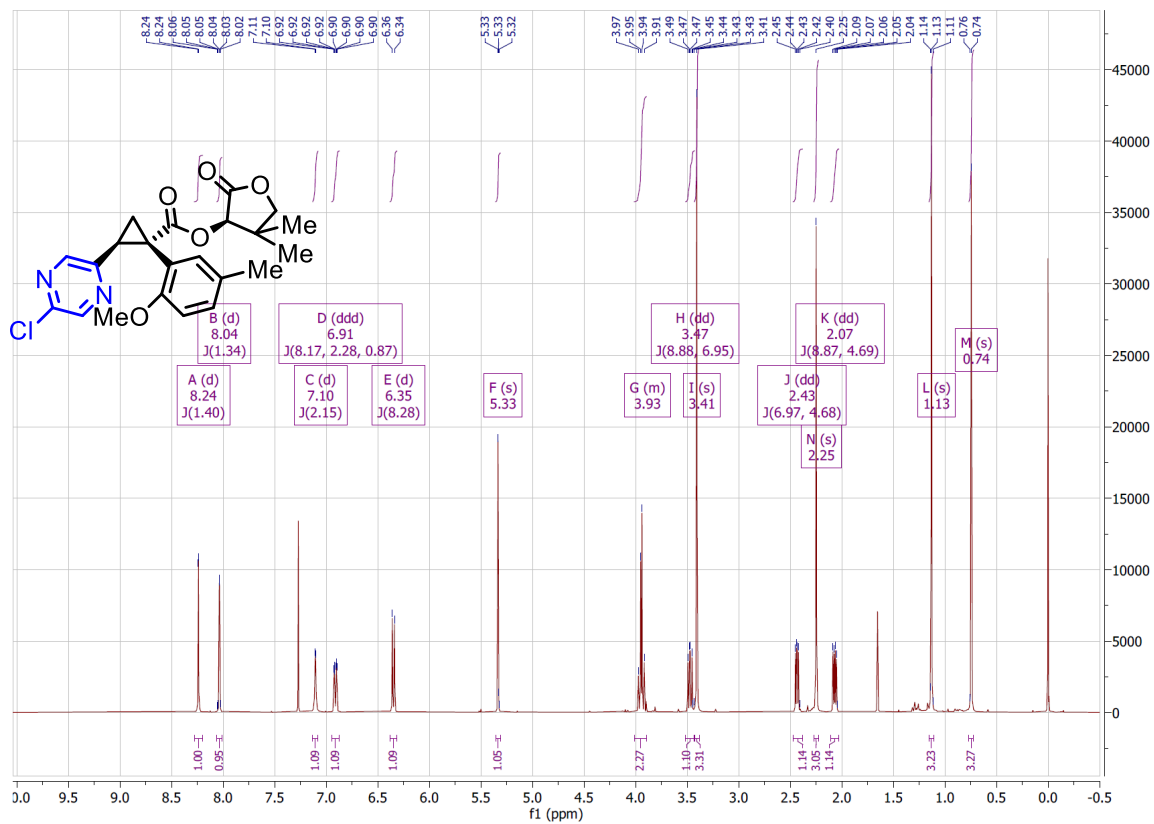

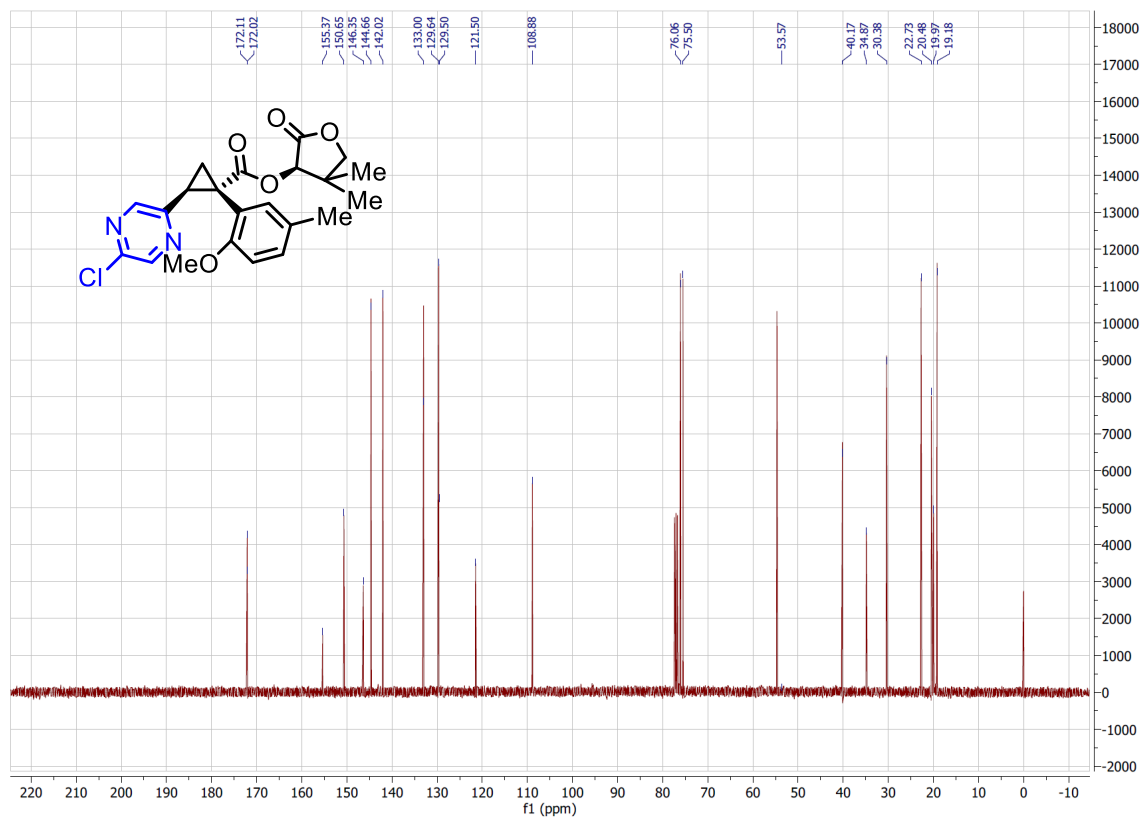

2020-1-21-Bo-ELN-36-106 — —

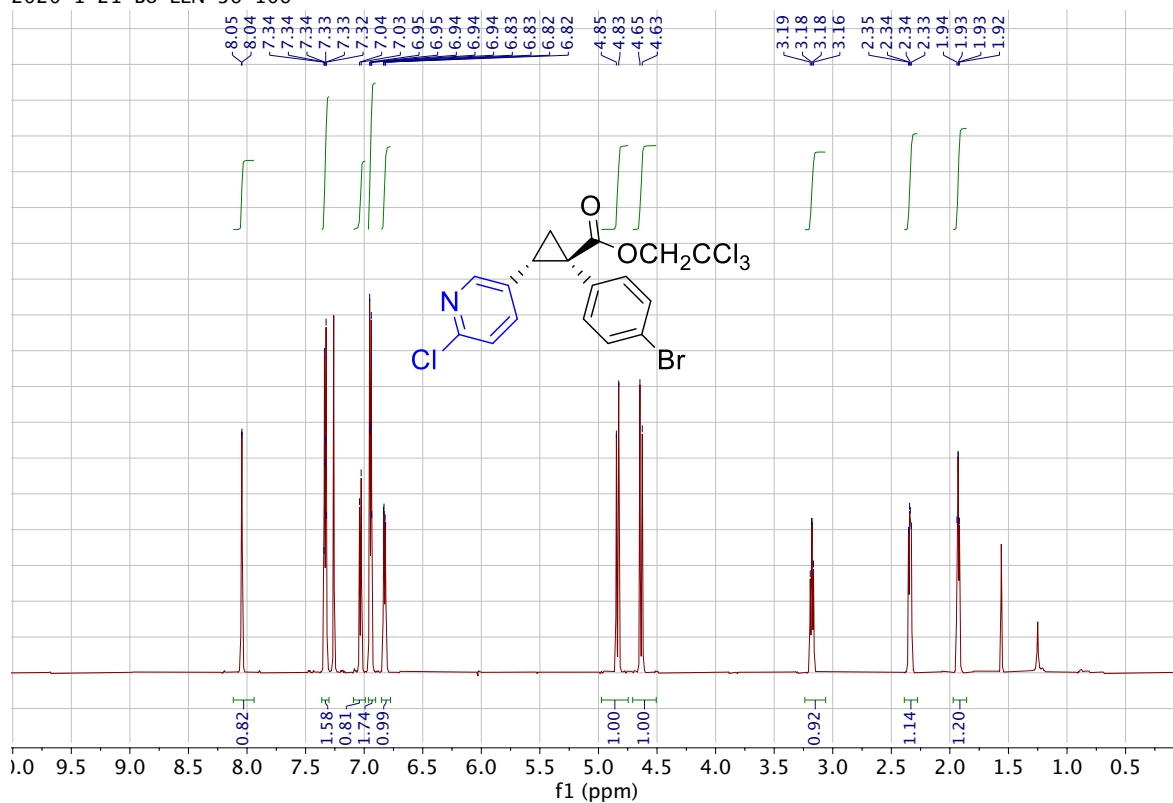

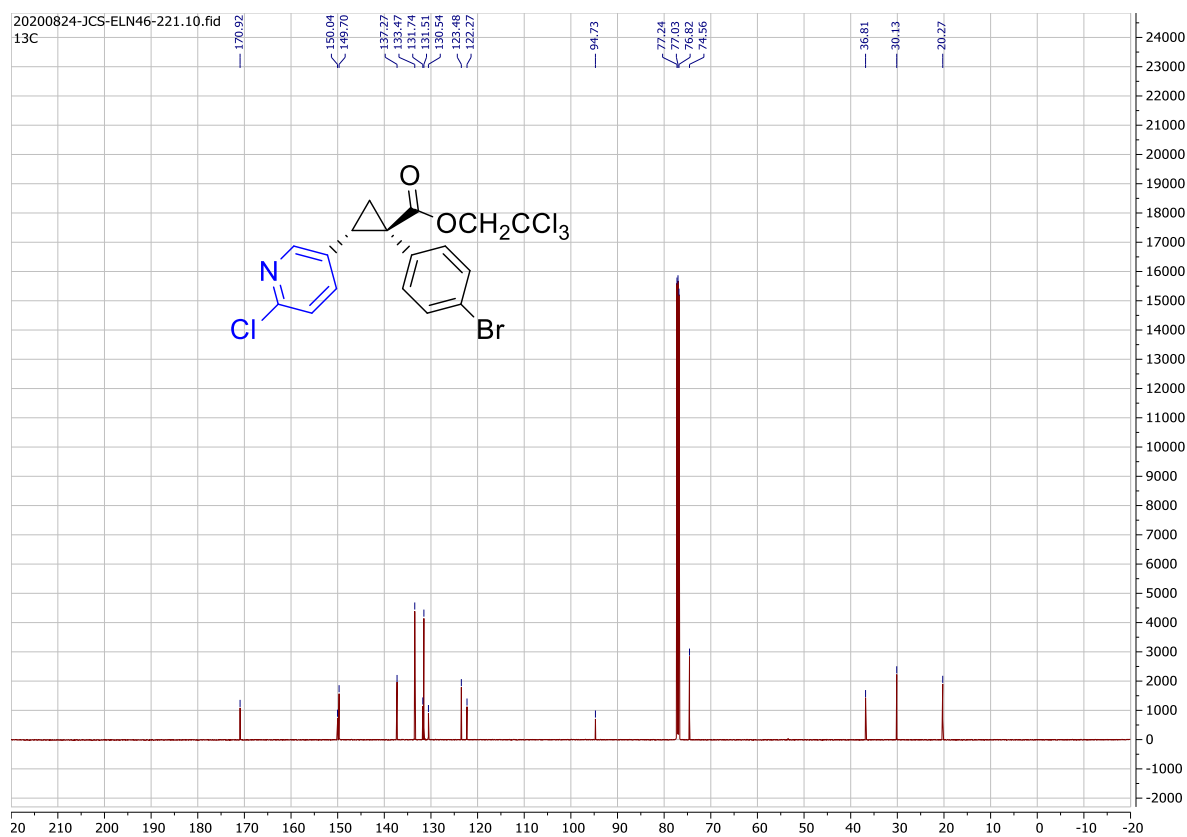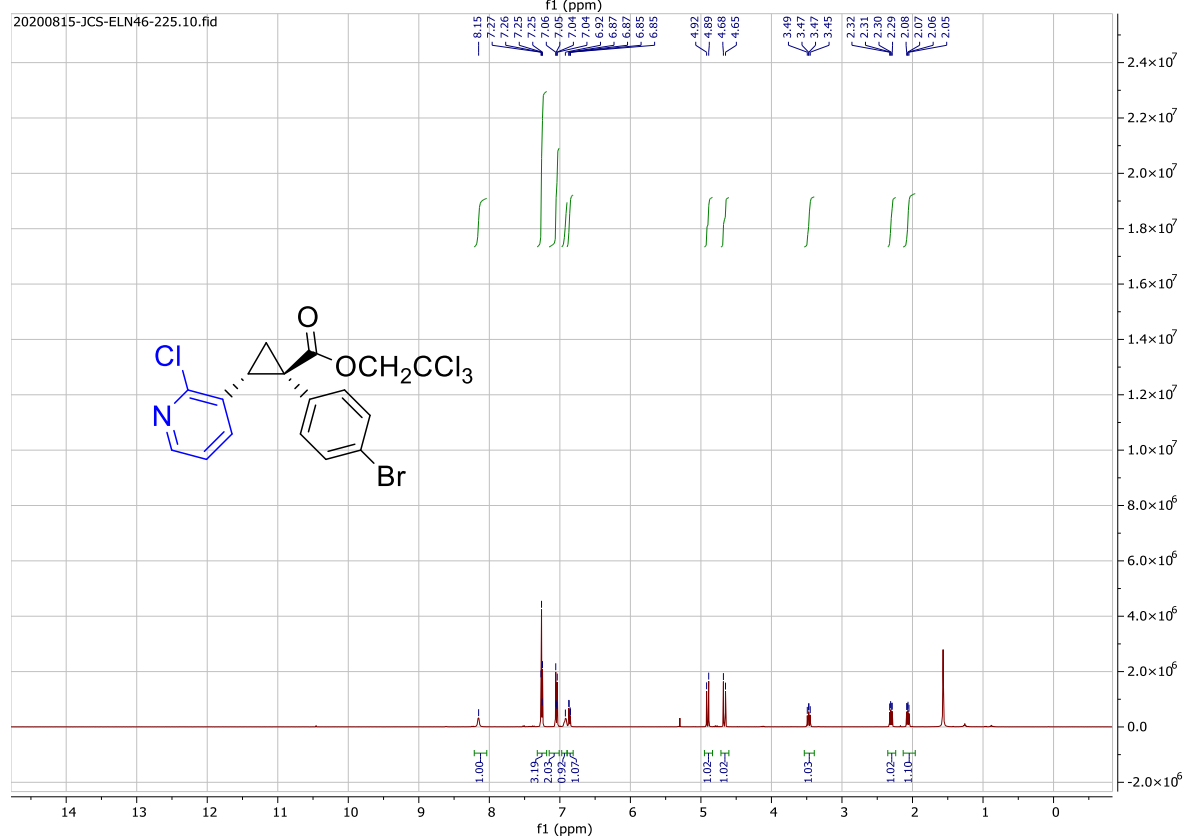

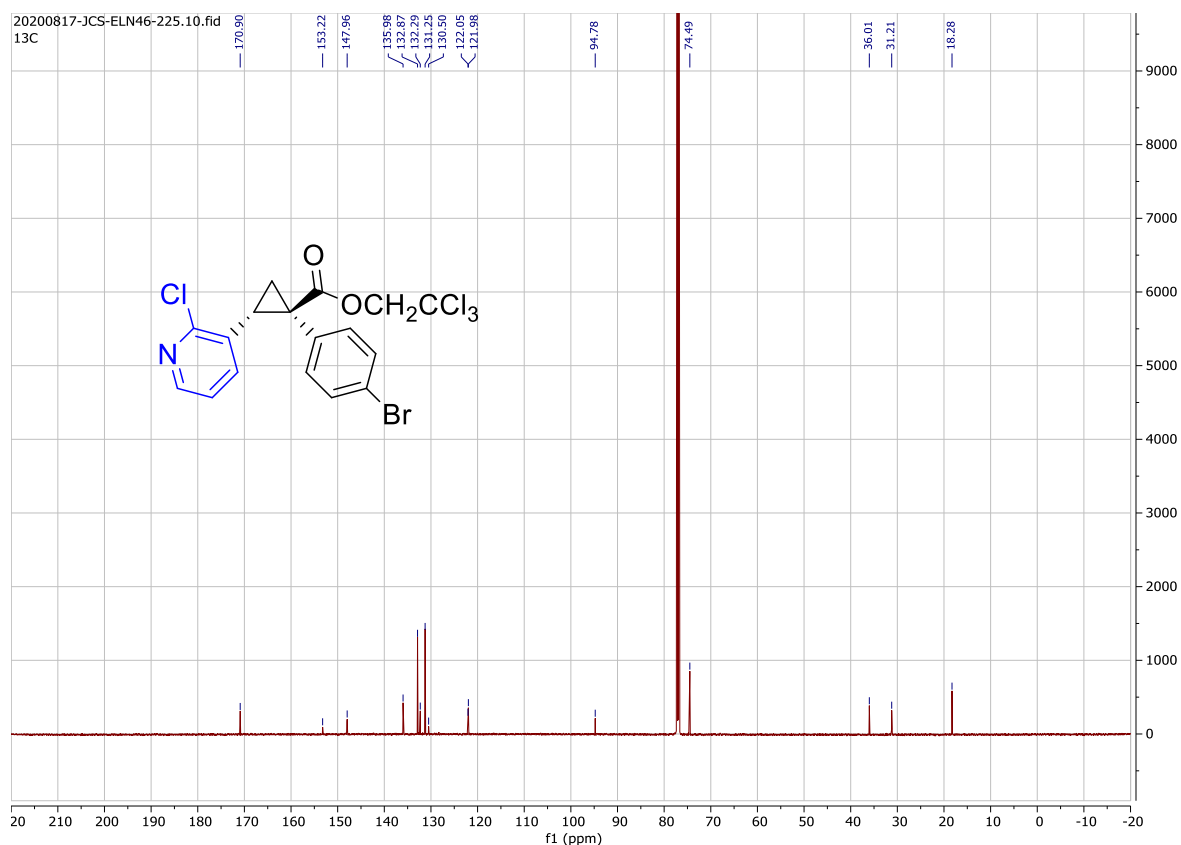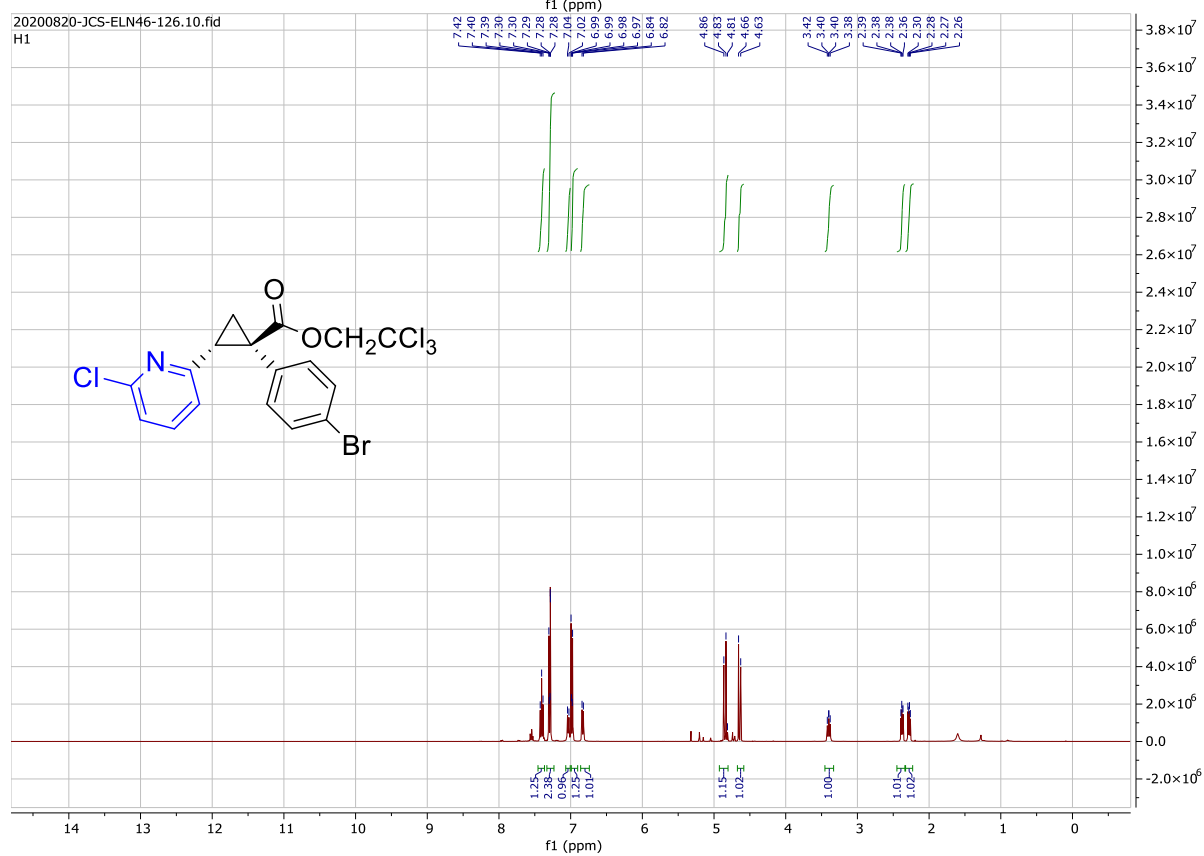

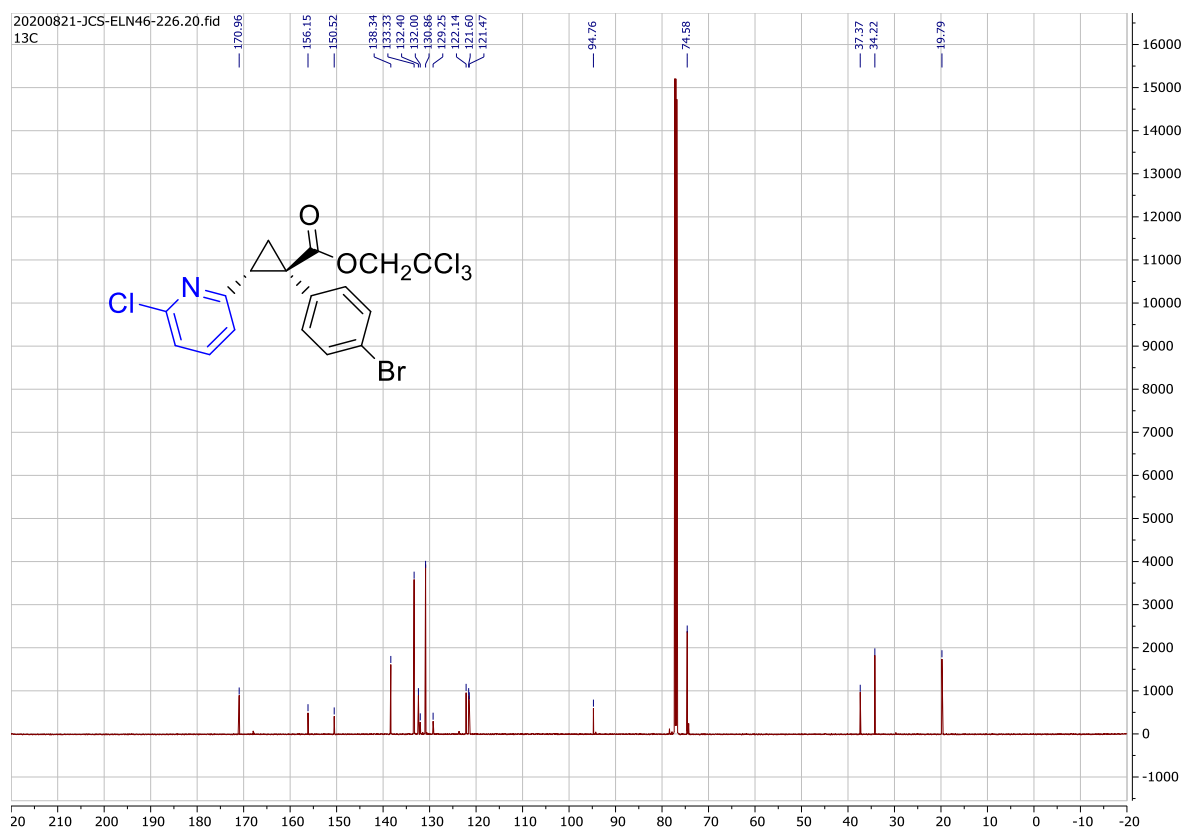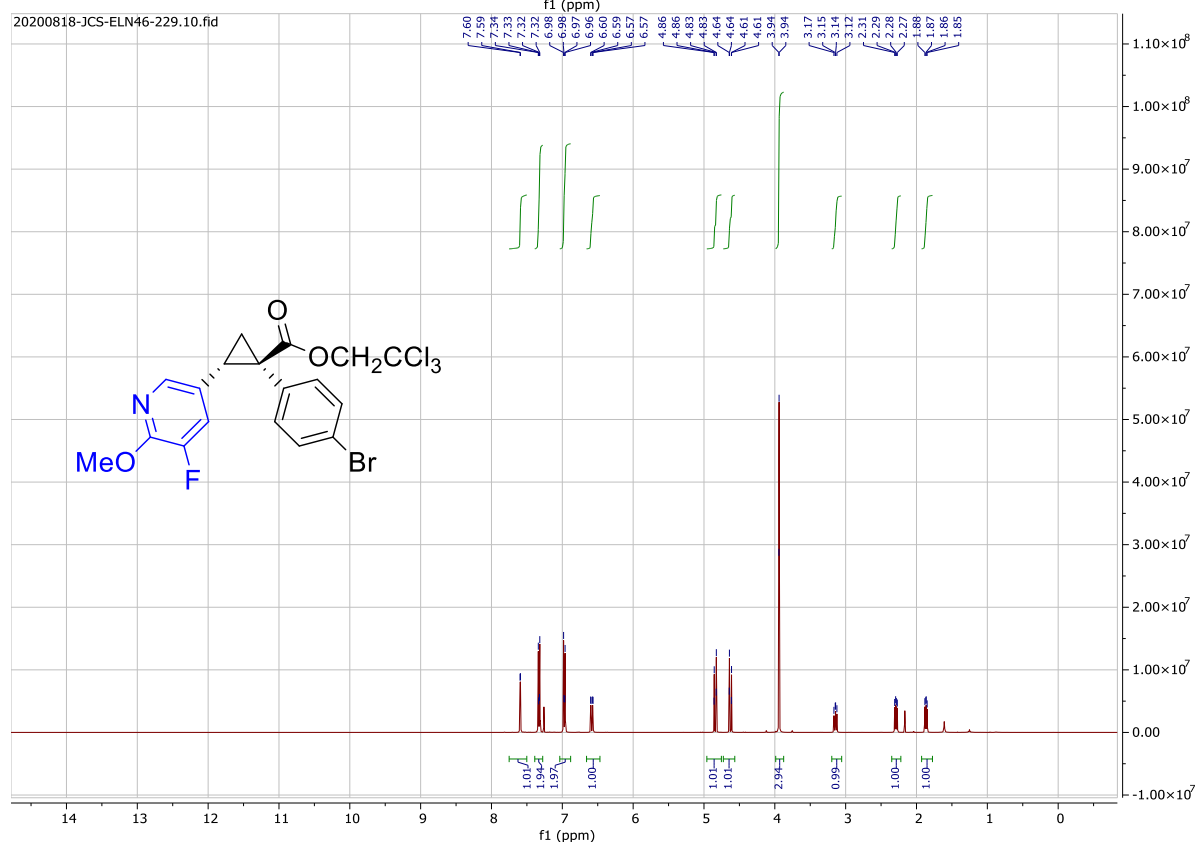

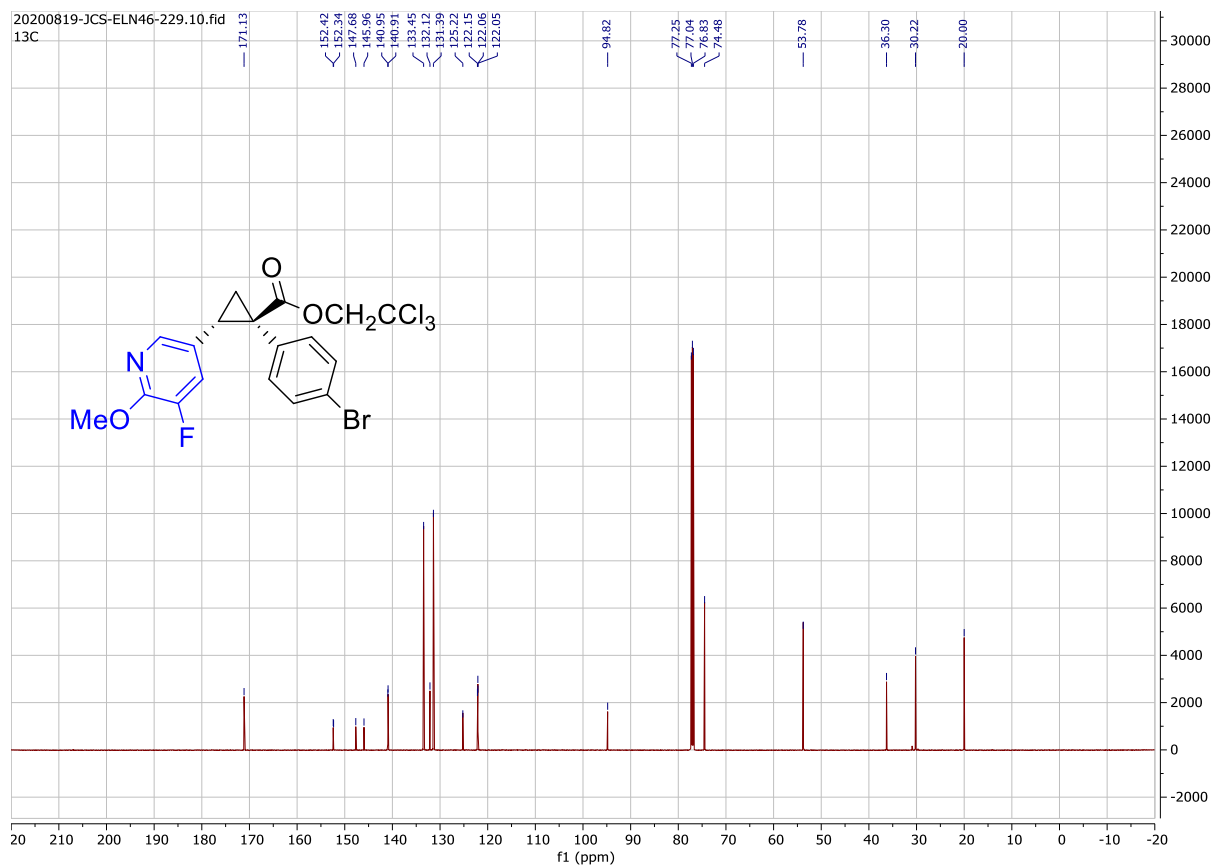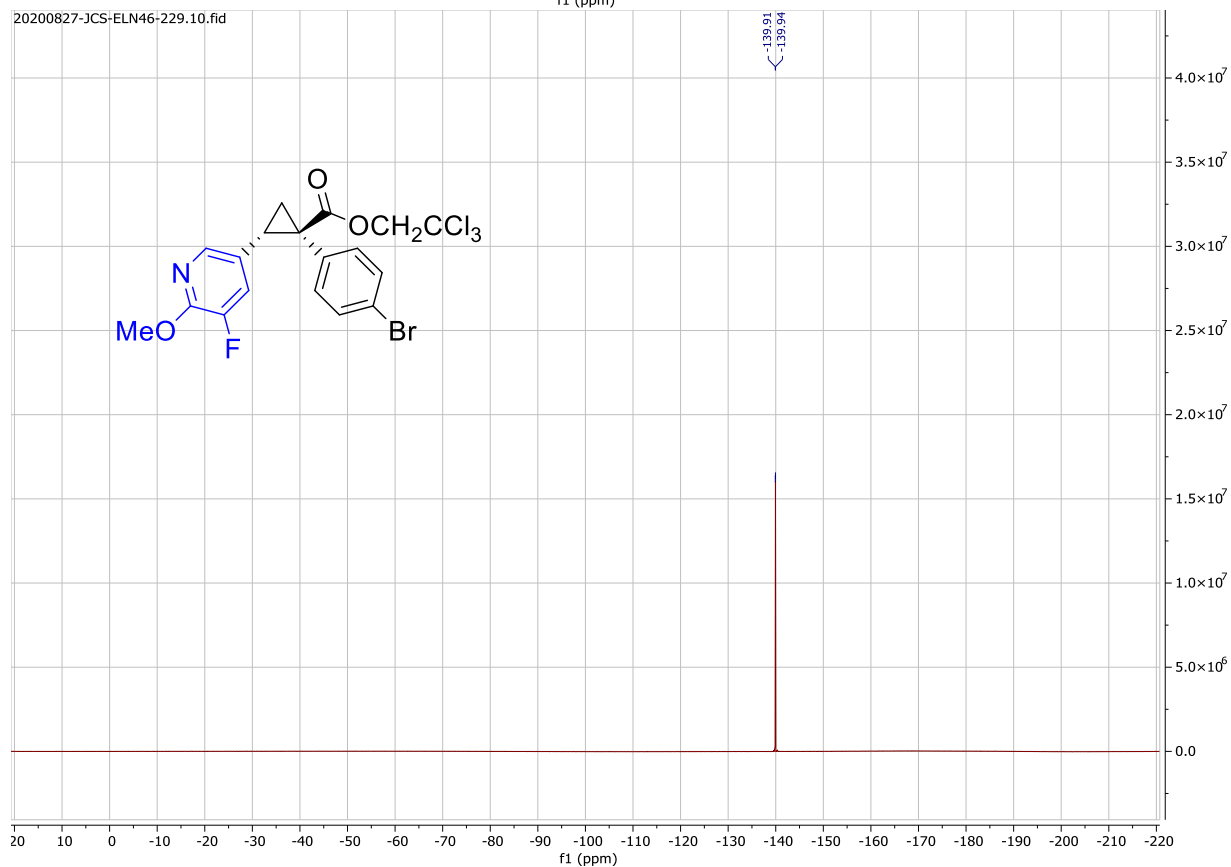

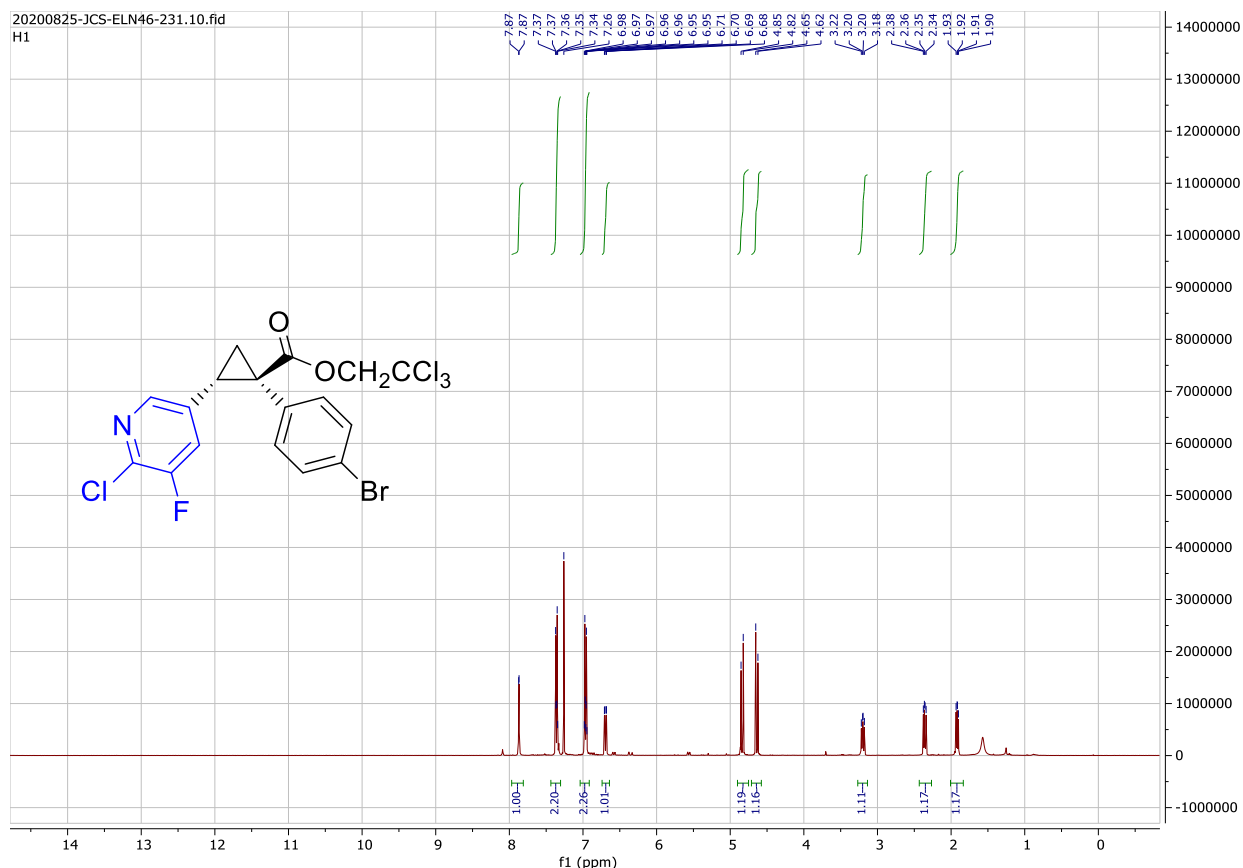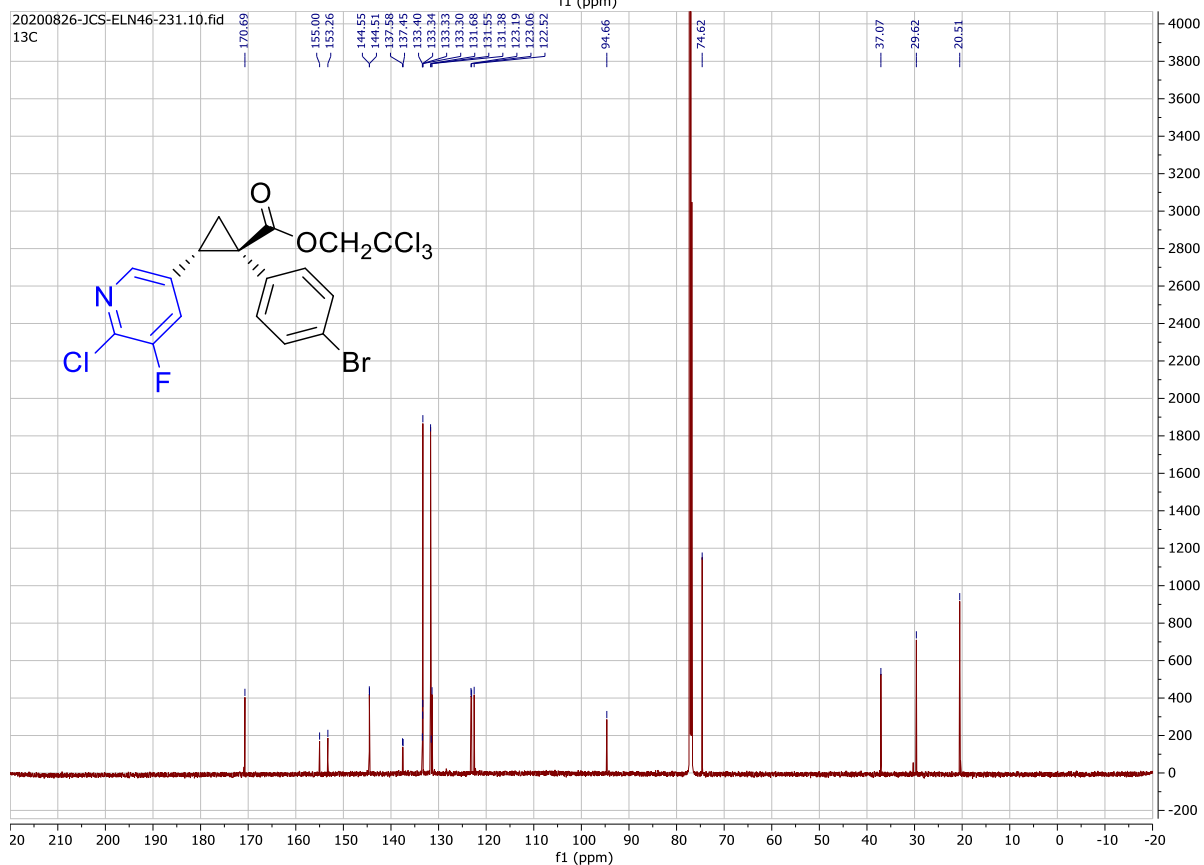

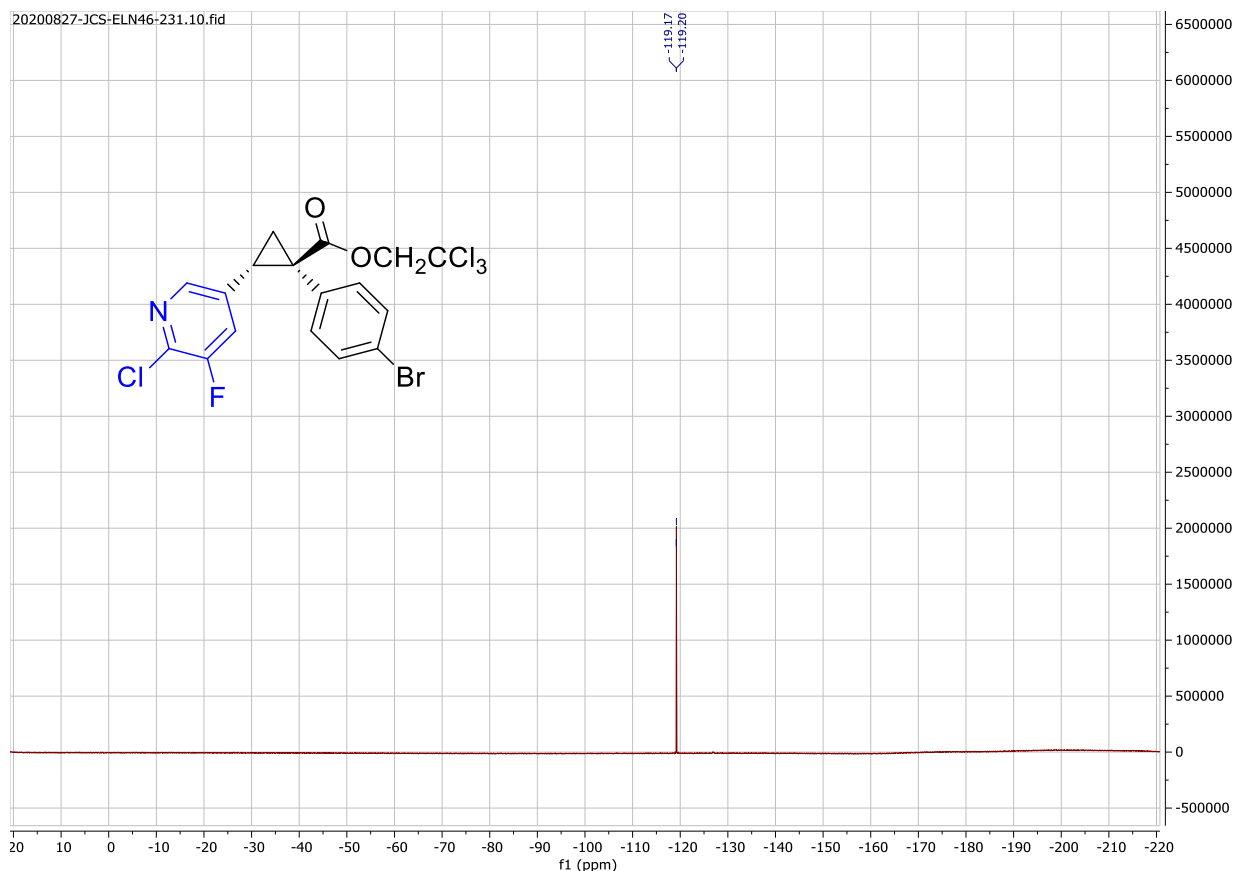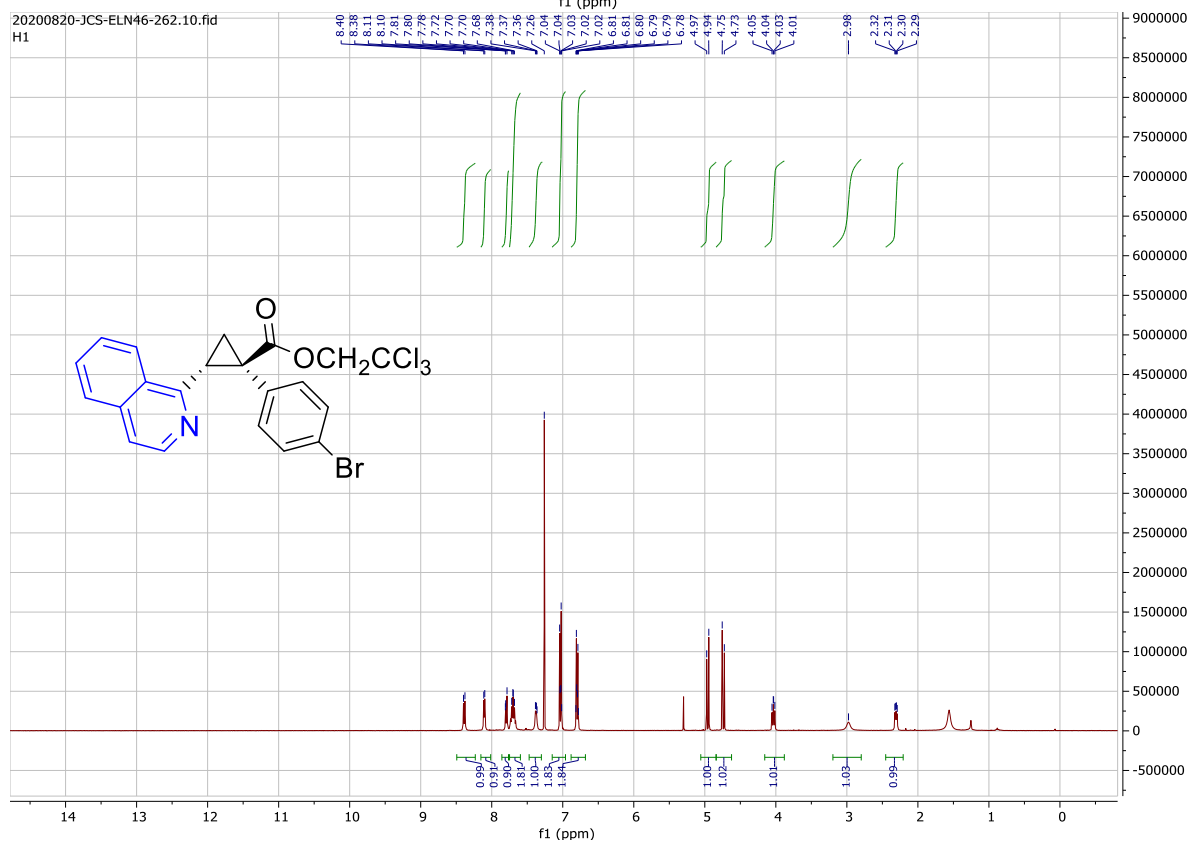

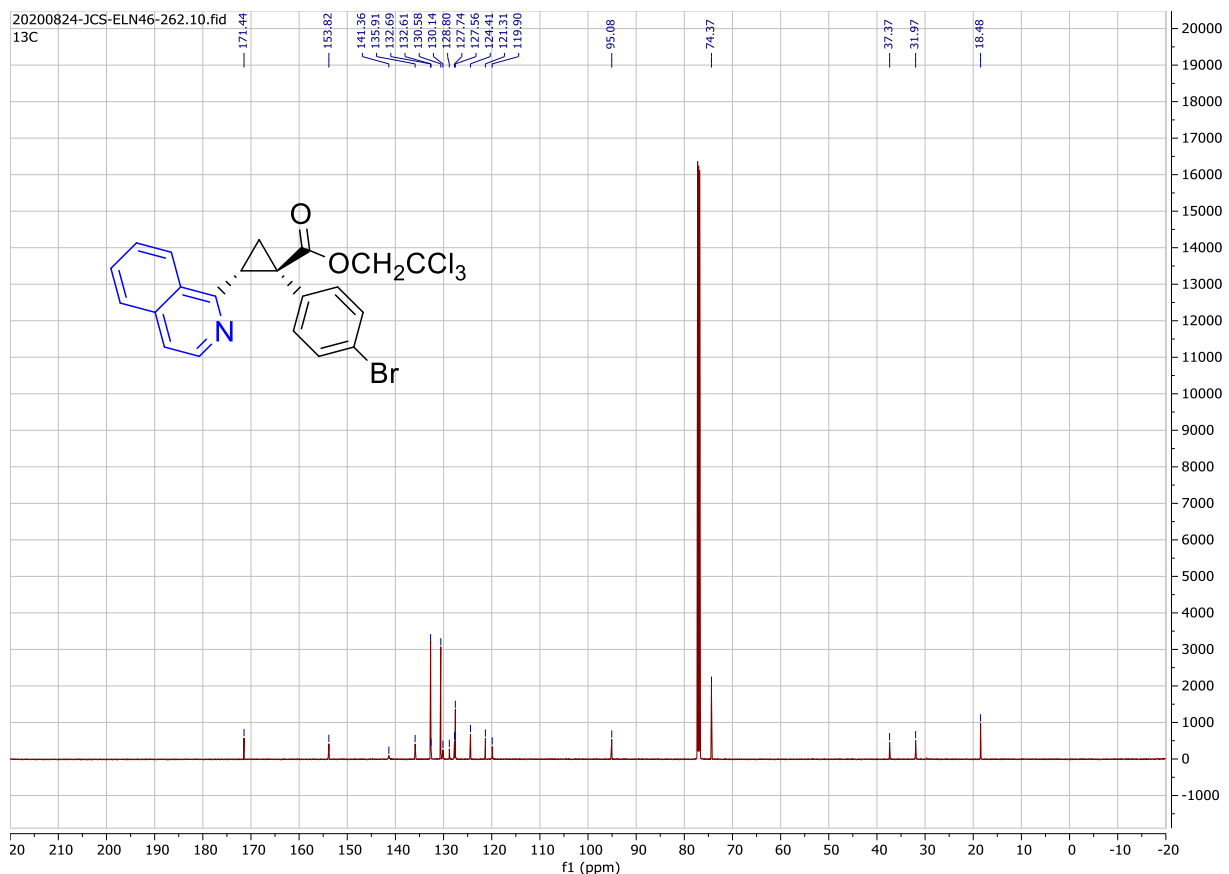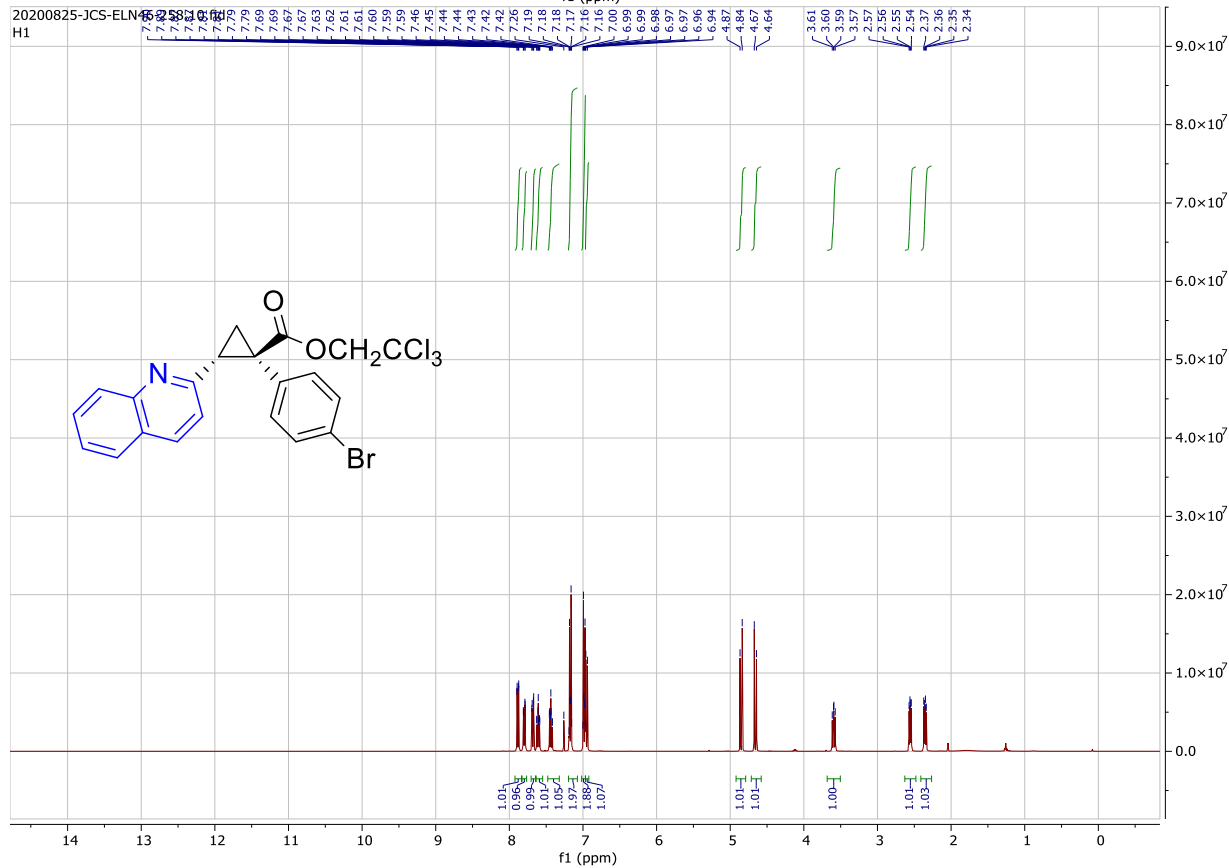

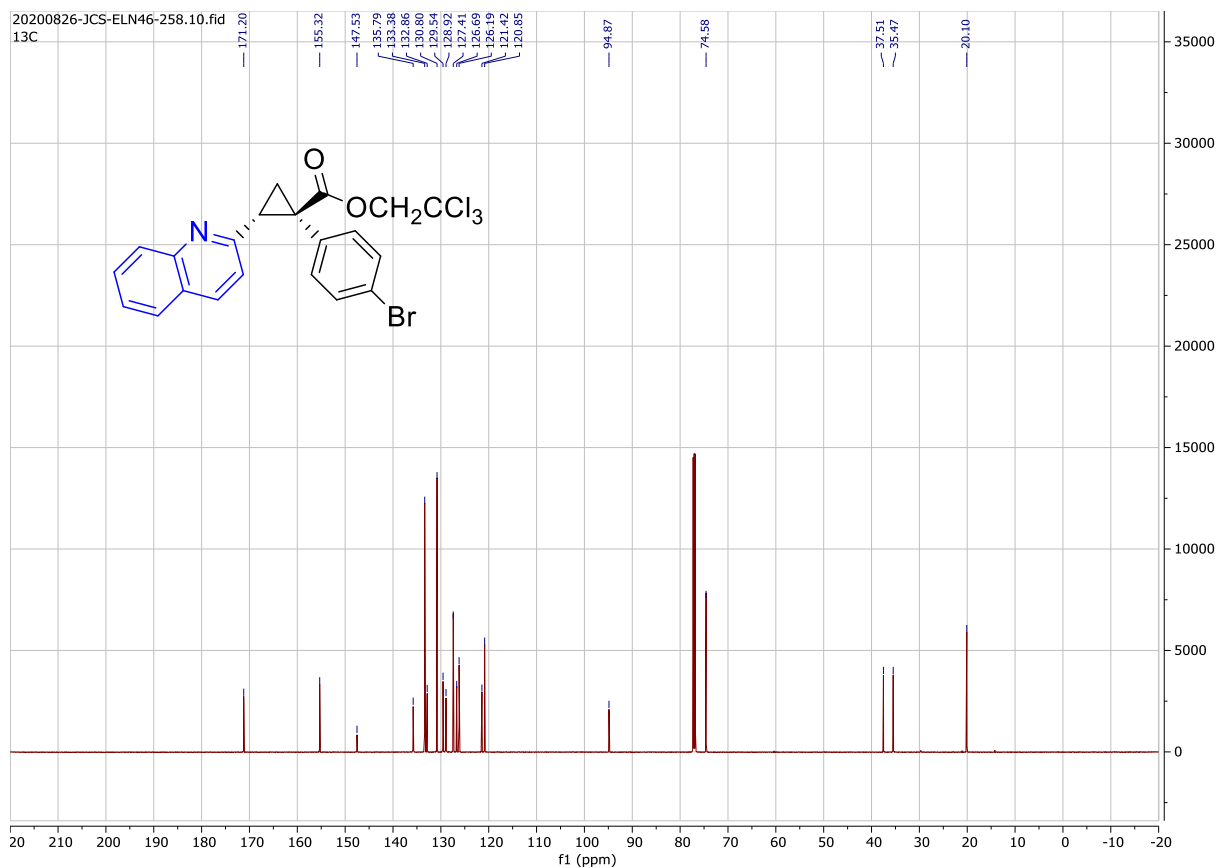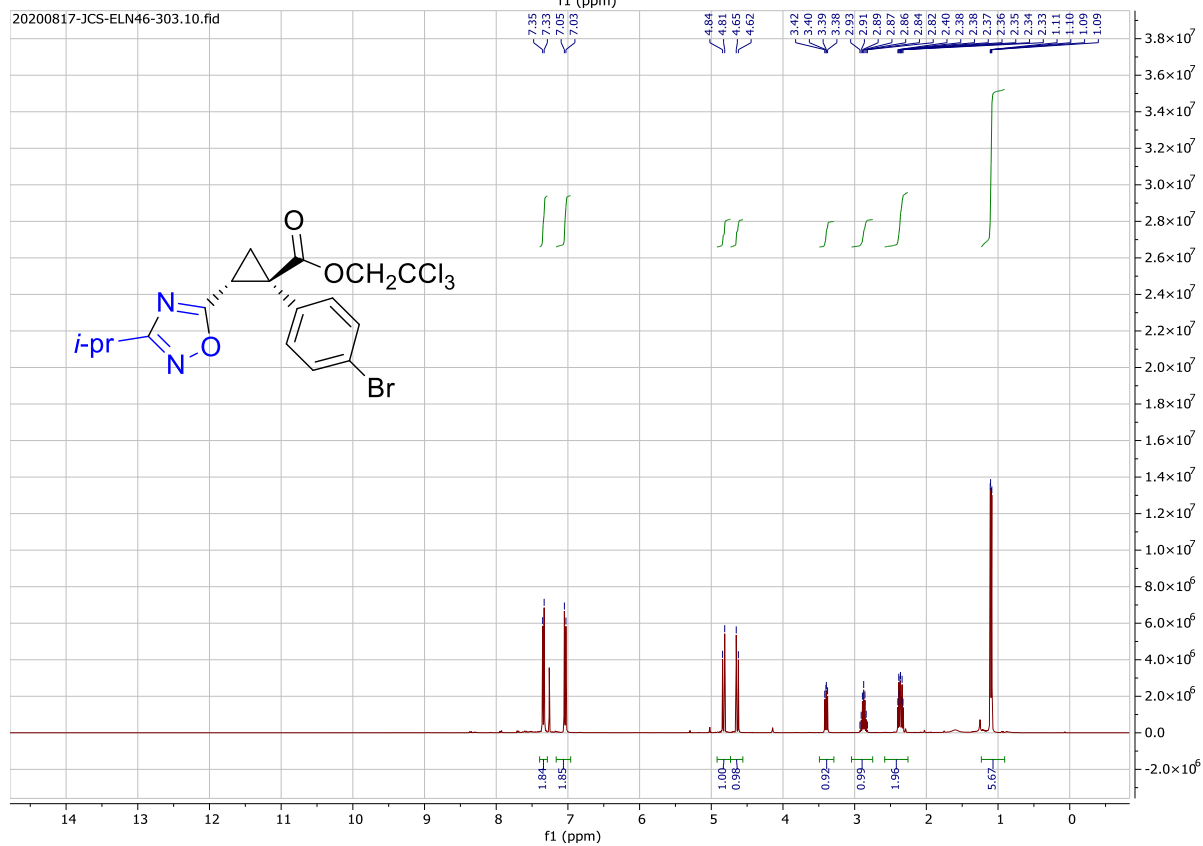

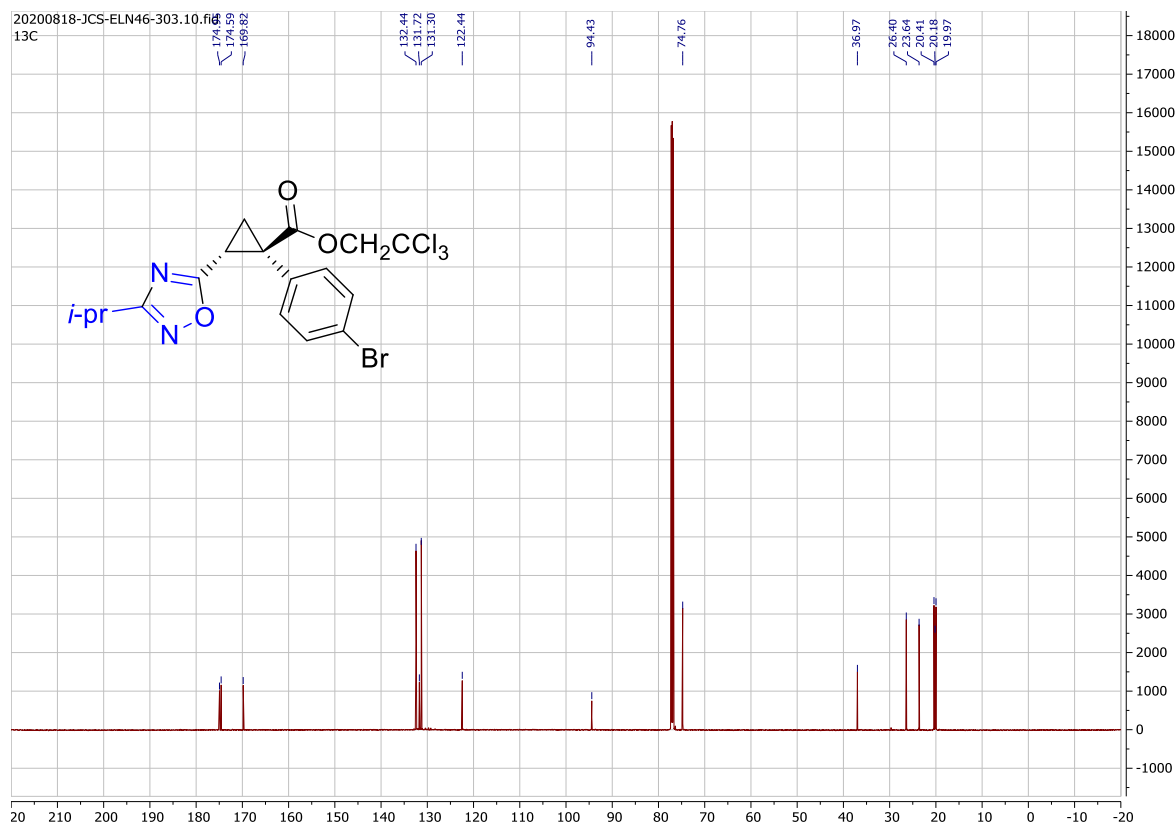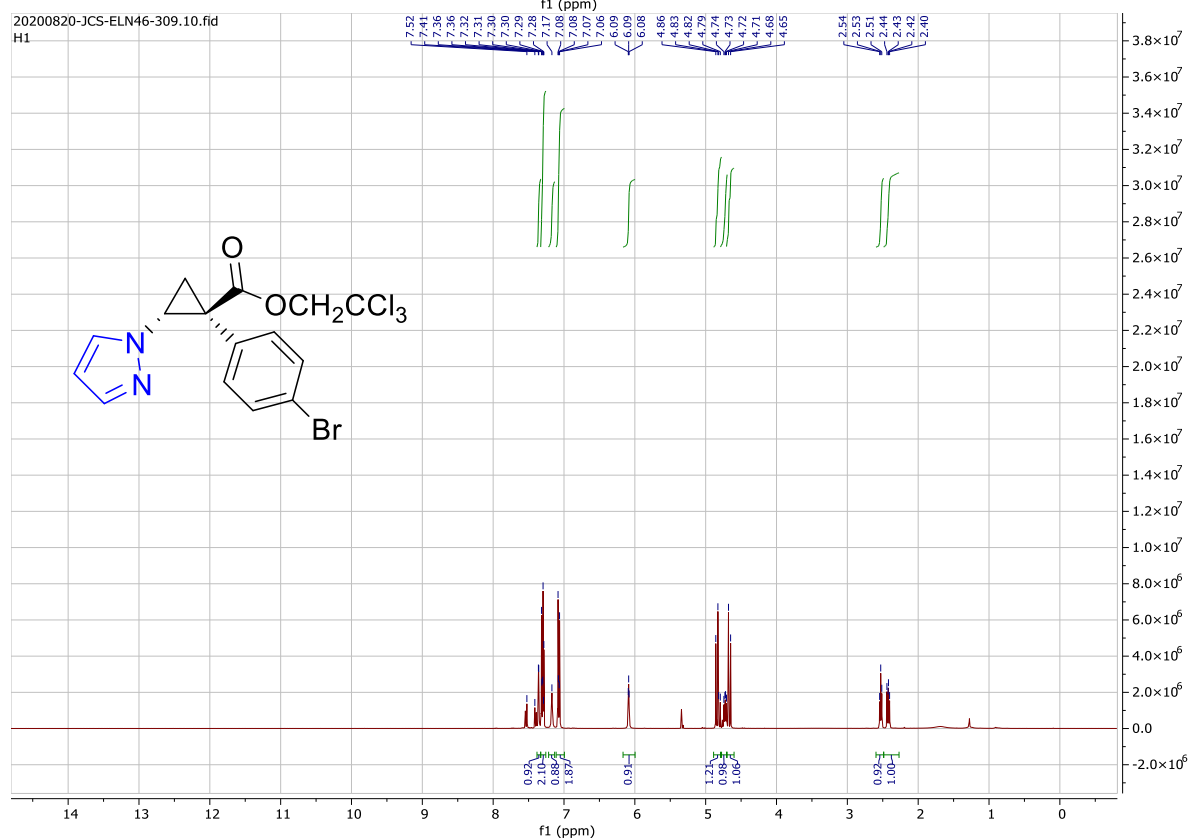

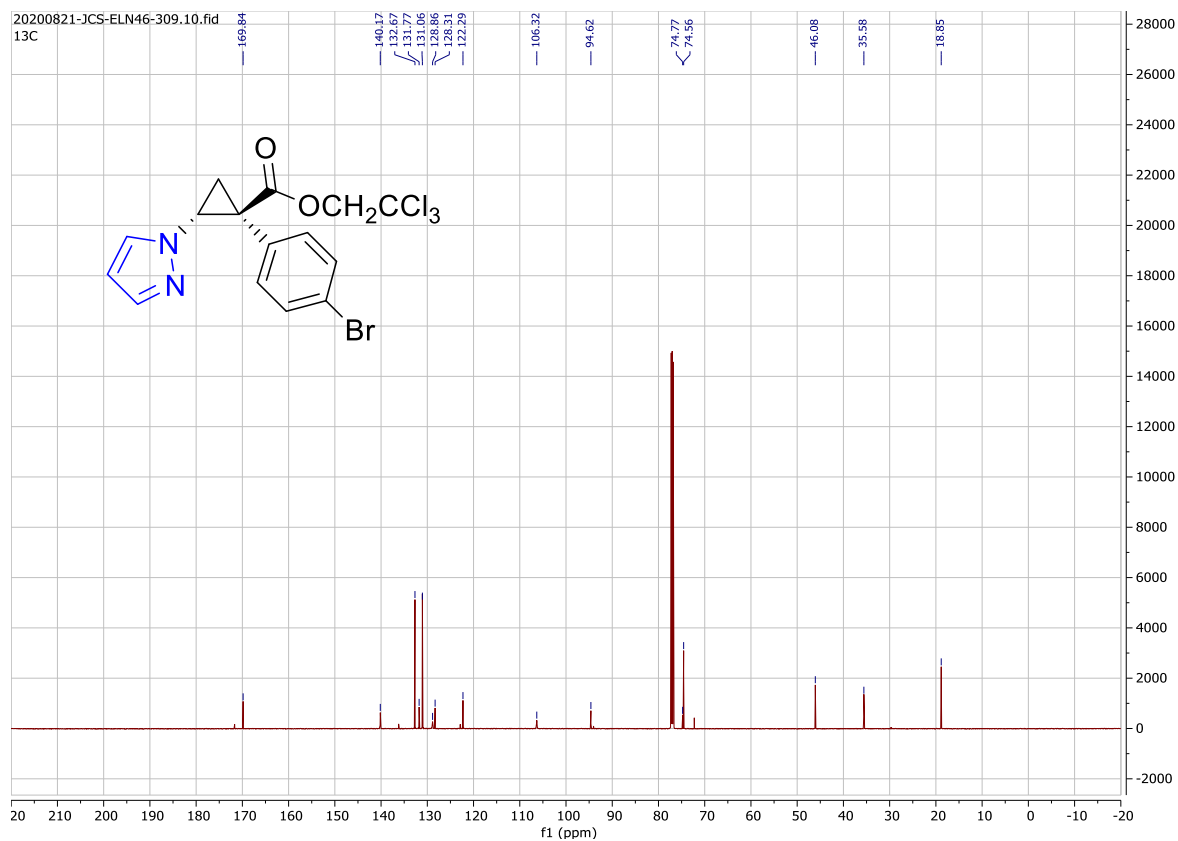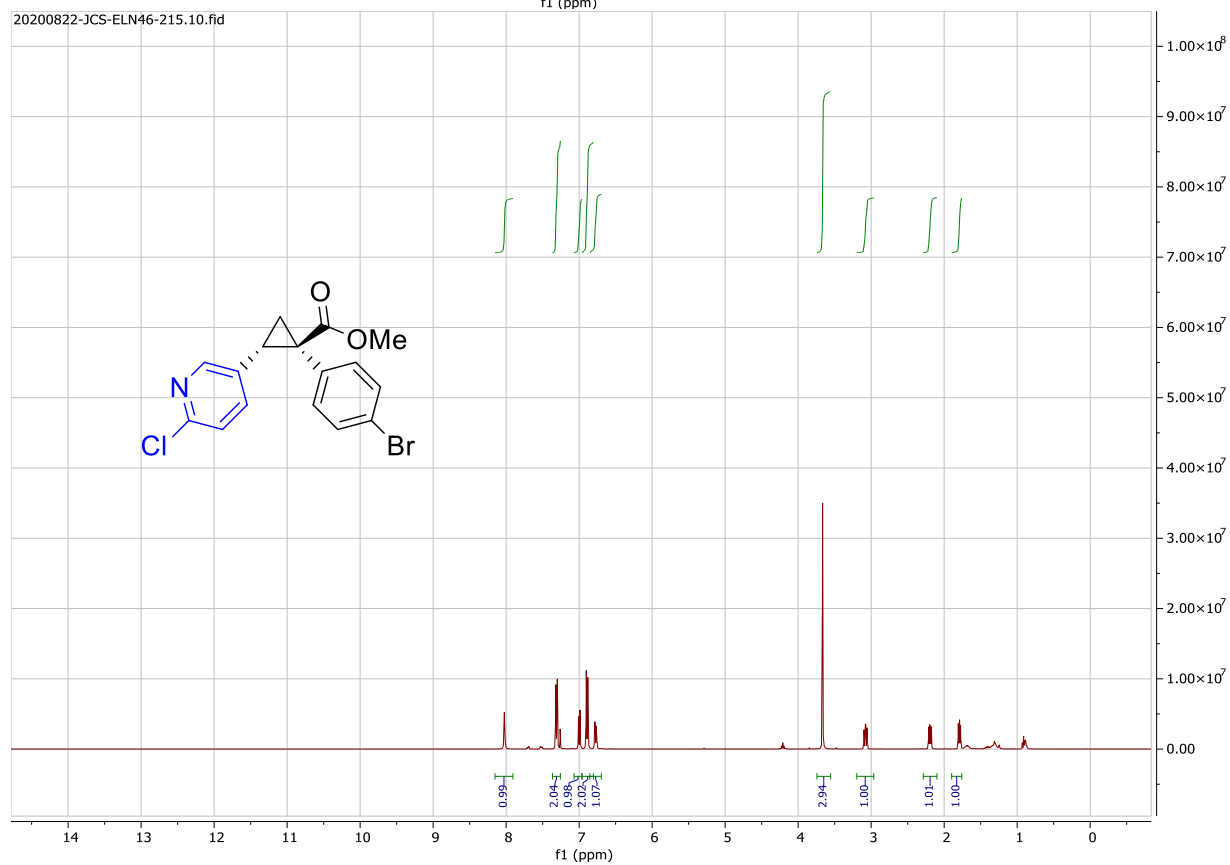

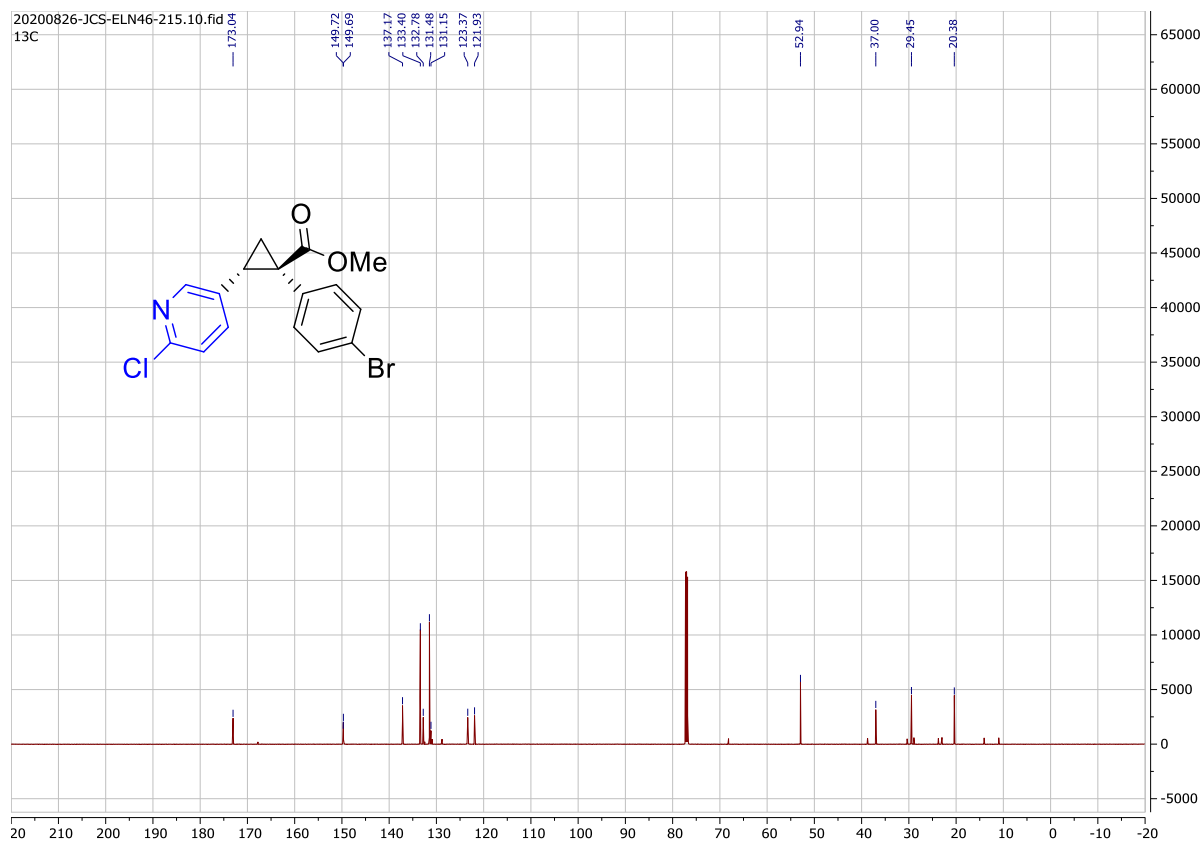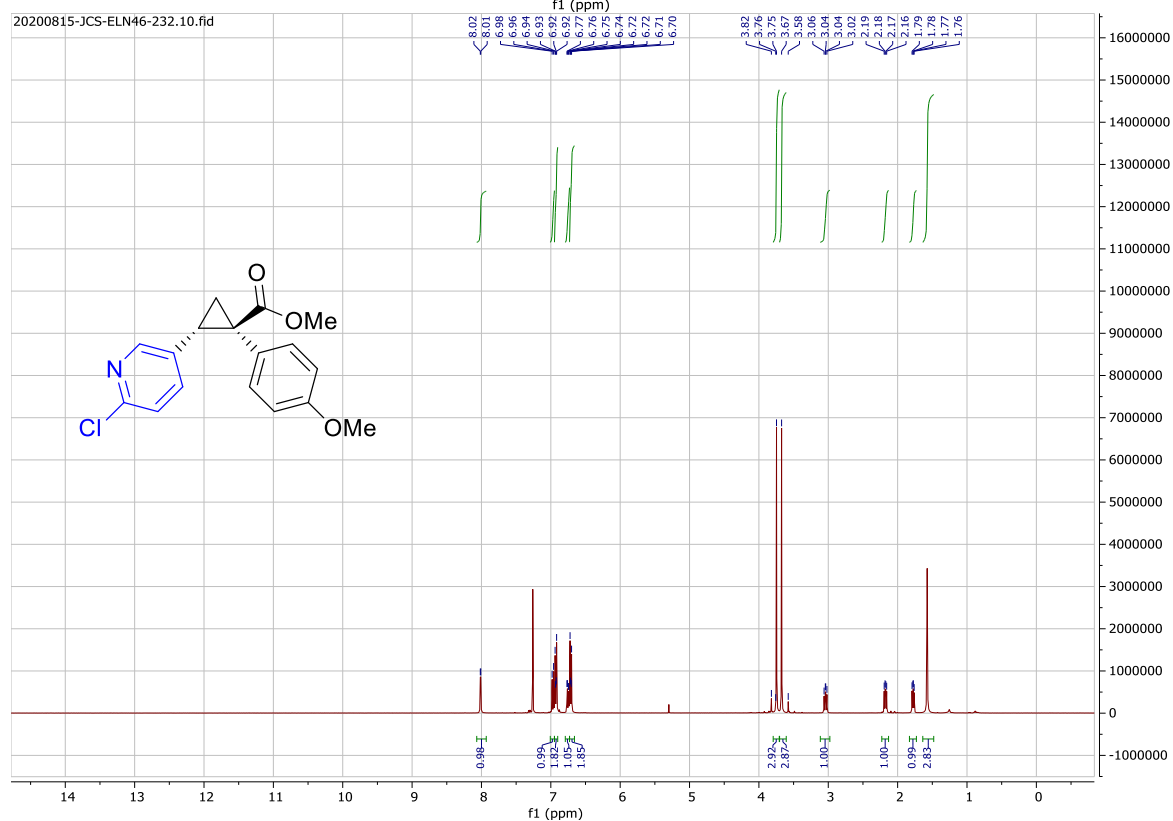

20200123-Bo-ELN-36-108-C.10.fid —

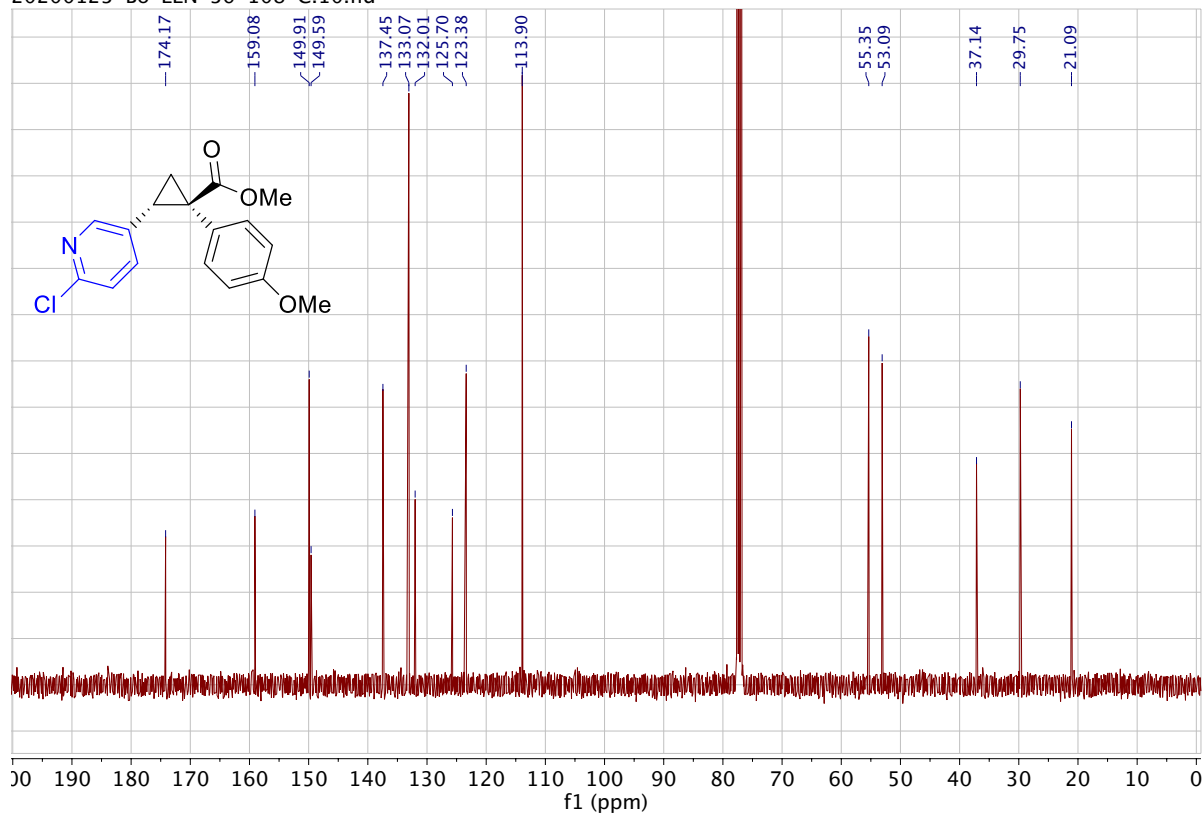

2020-1-15-Bo-ELN-36-102 — Xun-3-156-crude-INOVA600 —

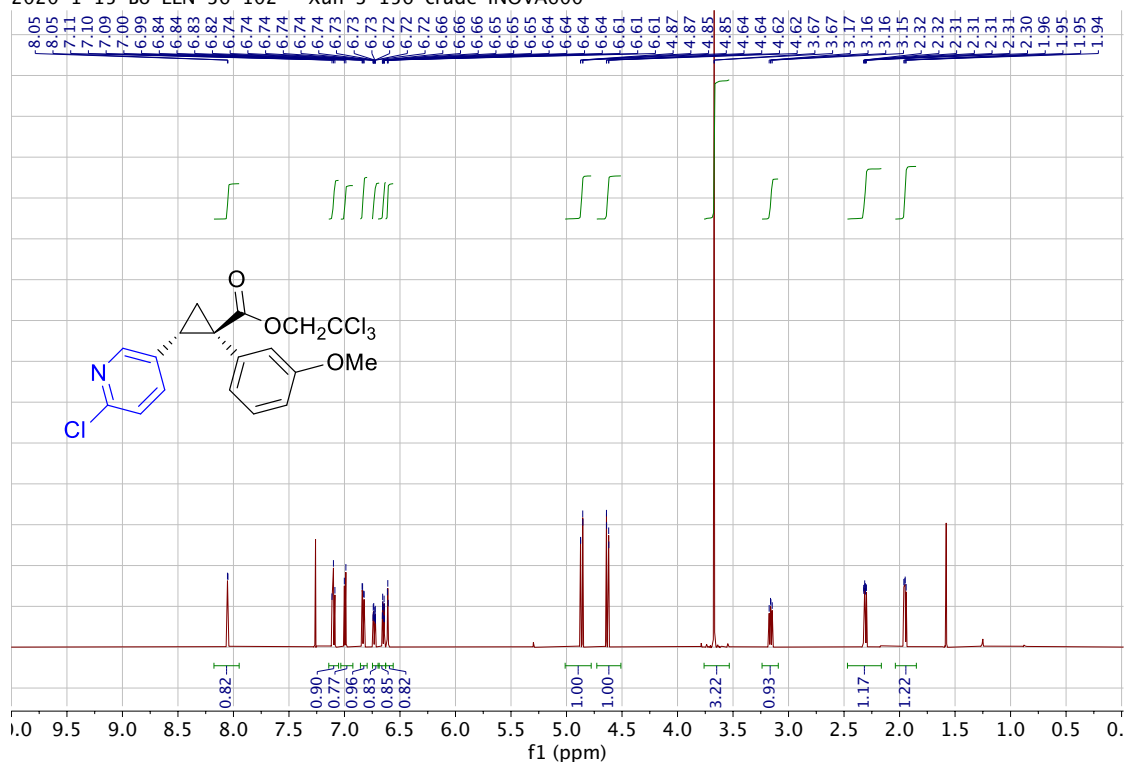

20200115-Bo-ELN-36-102-C.10.fid —

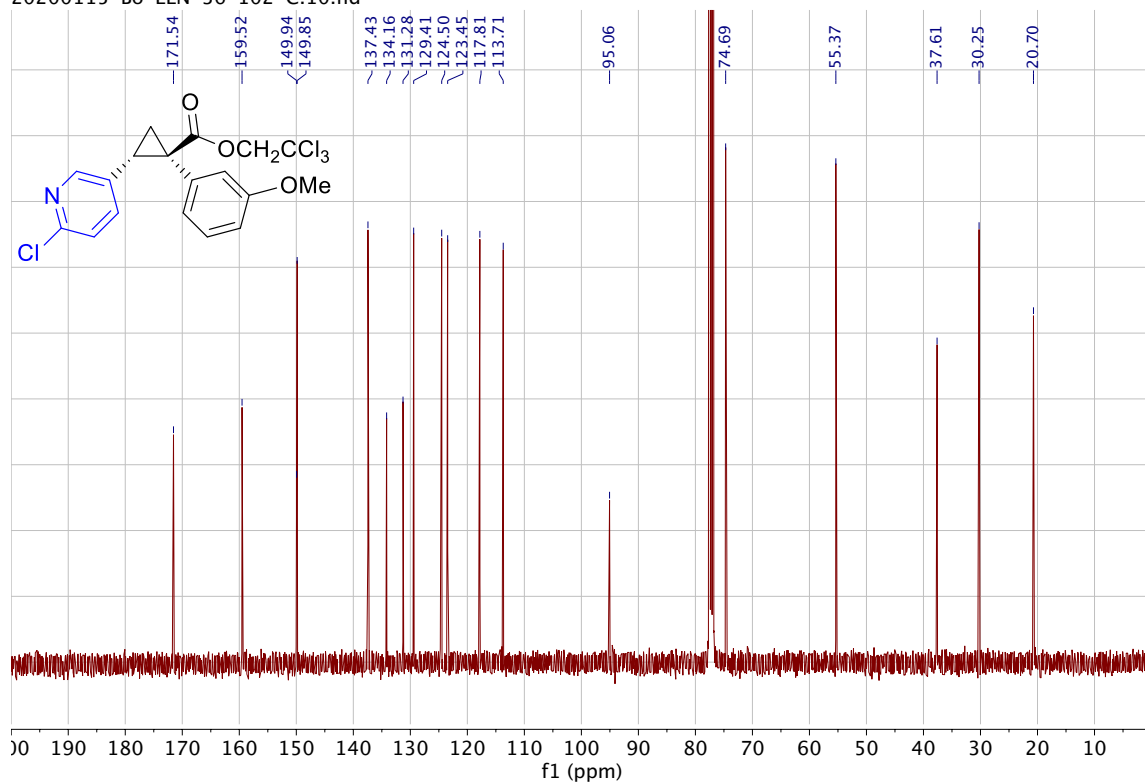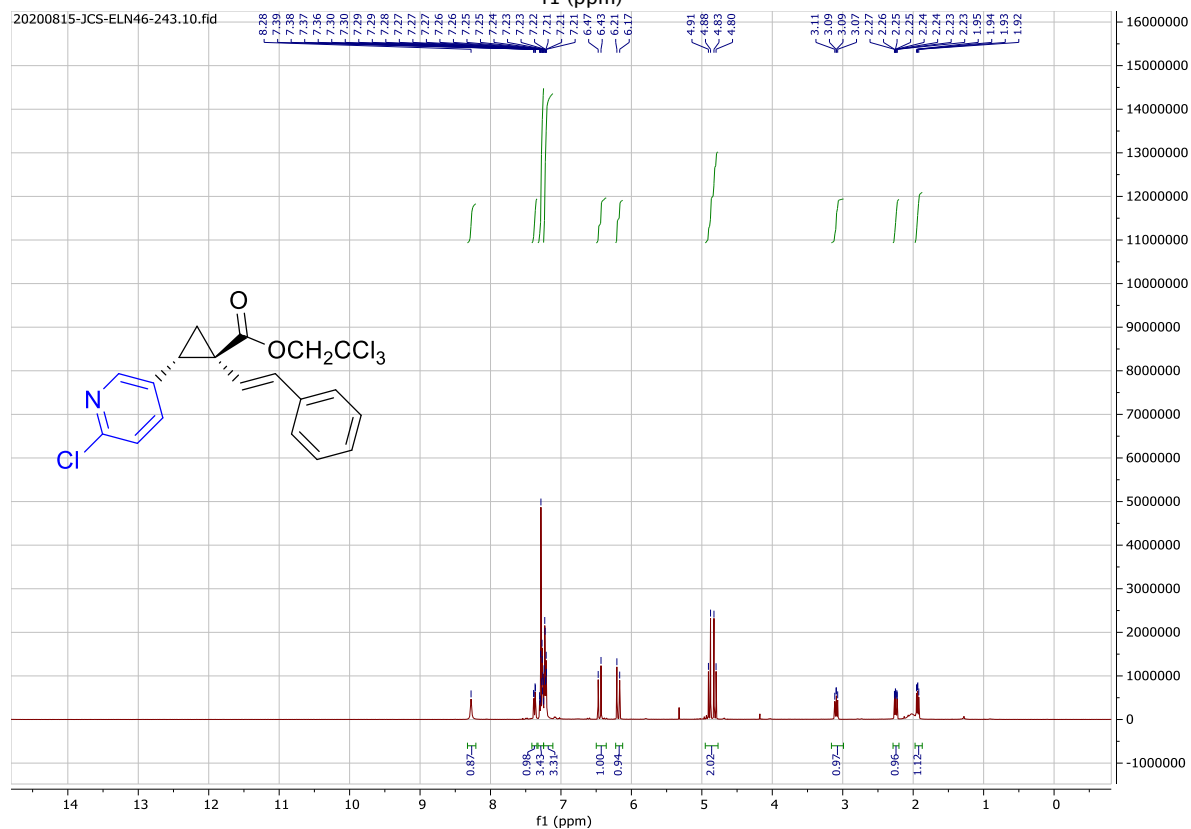

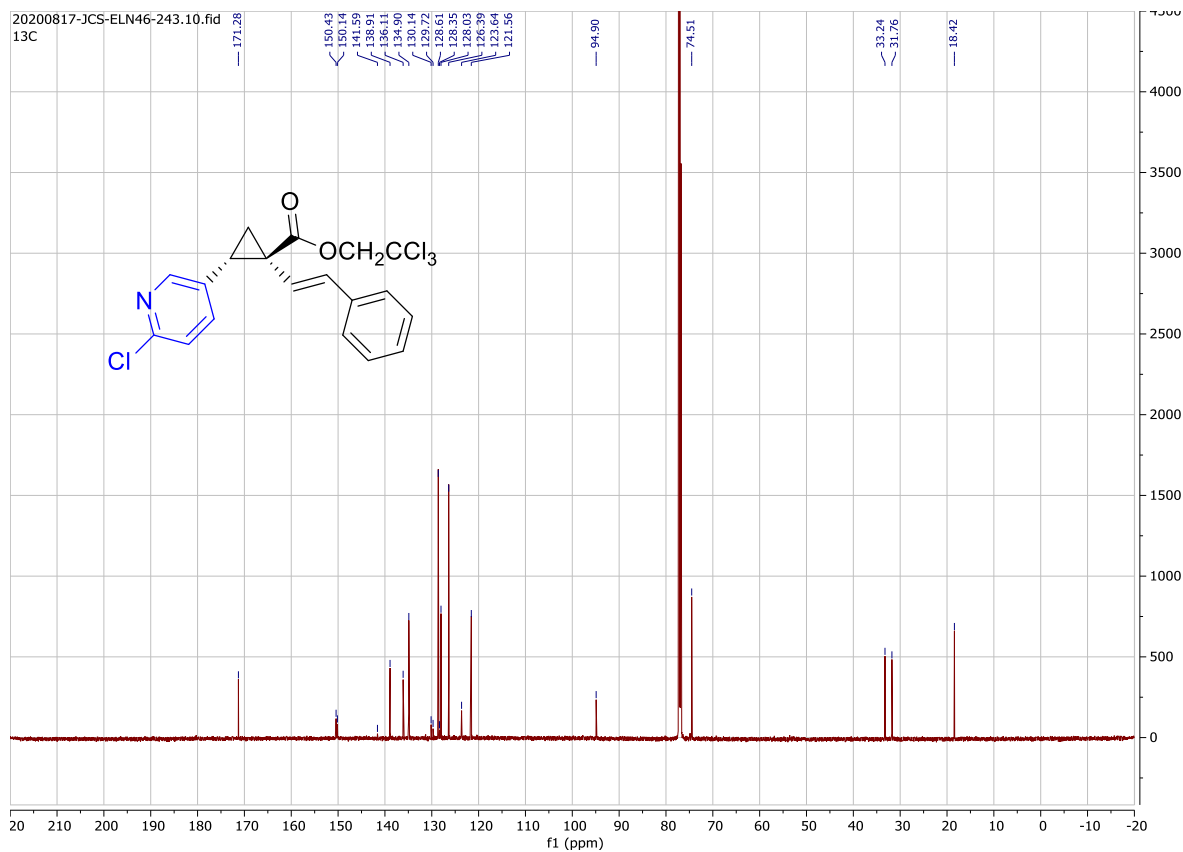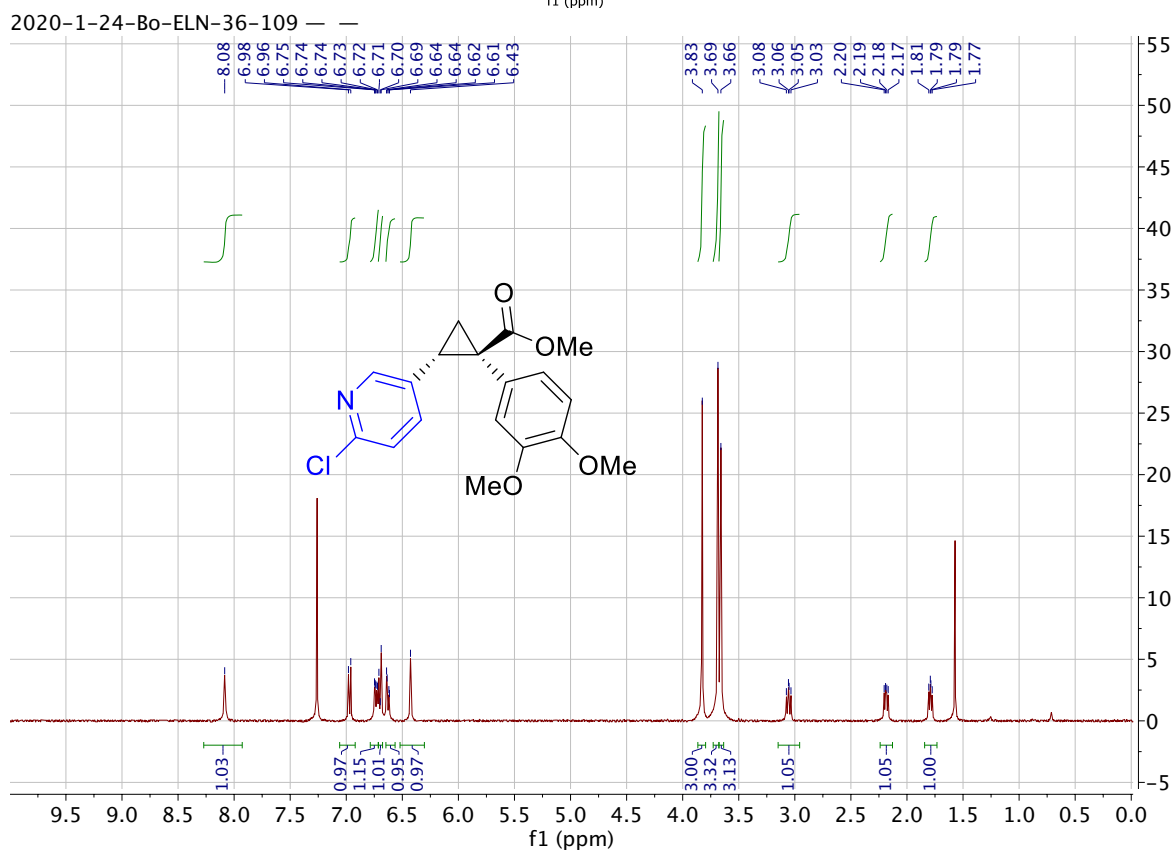

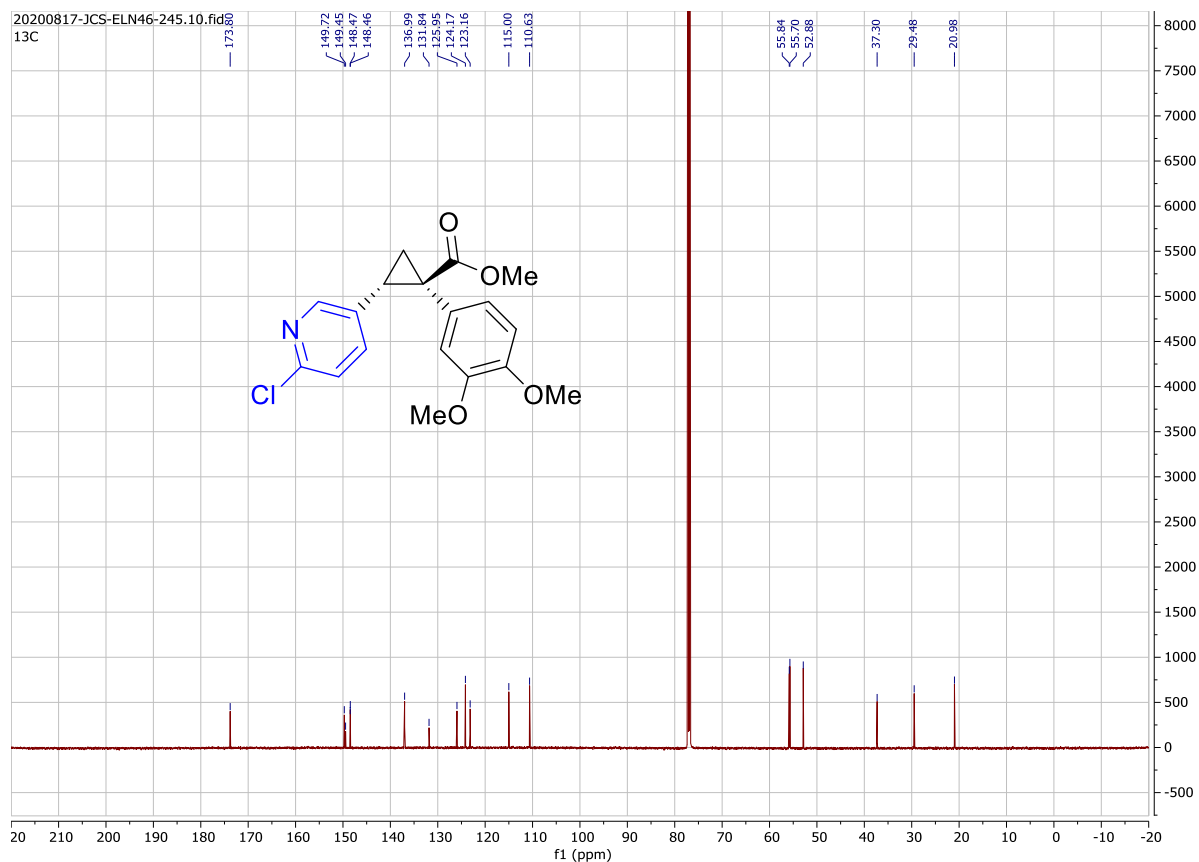

2019-7-11-ELN-0036-0014 — Silica plugged —

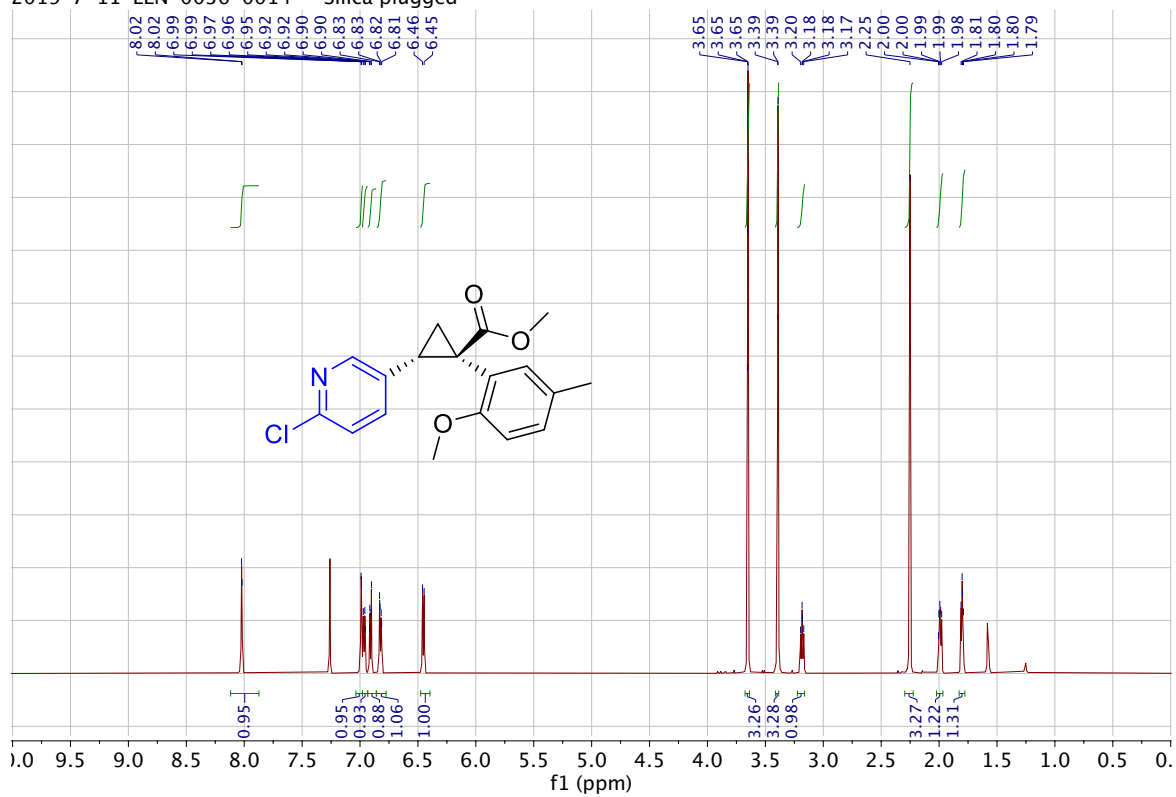

Bo-ELN-0036-0033.10.fid —

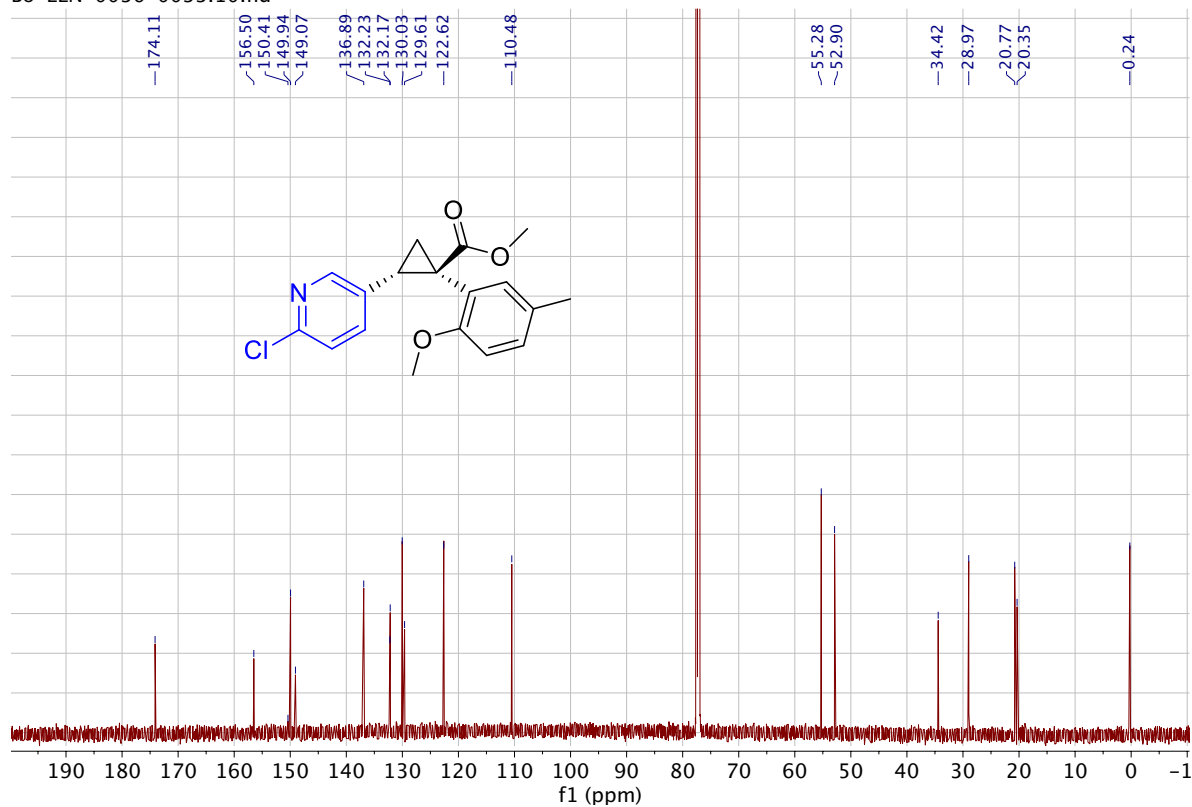

20200825-JCS-ELN46-018.10.fid  
H1

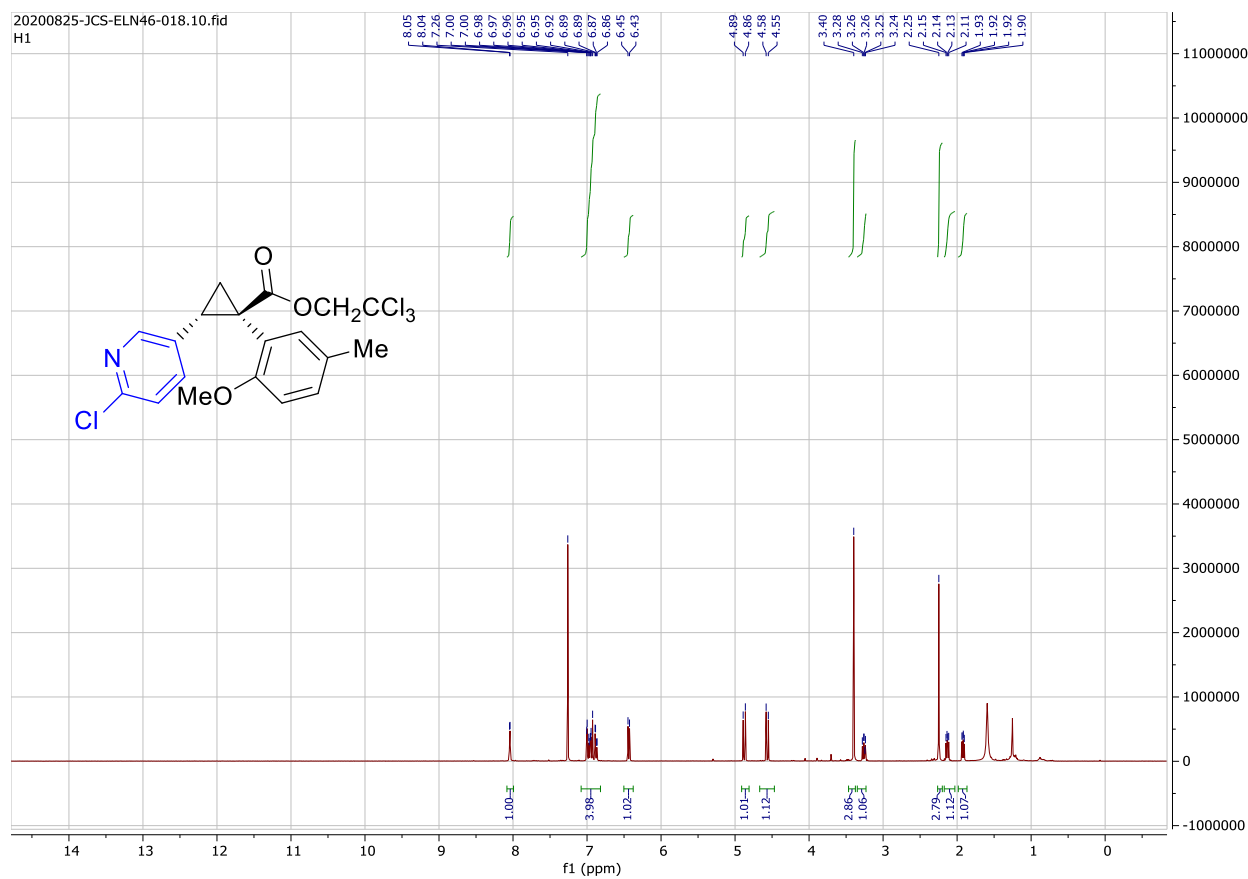

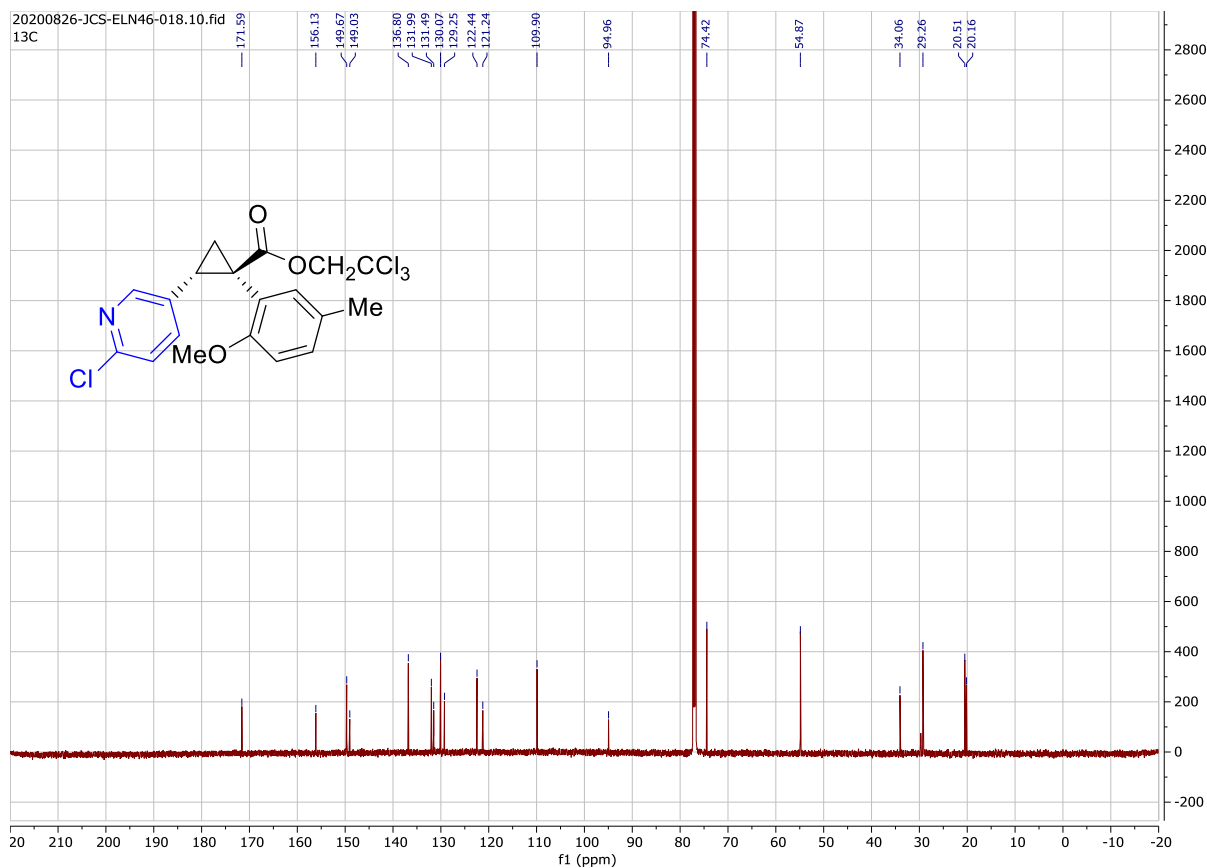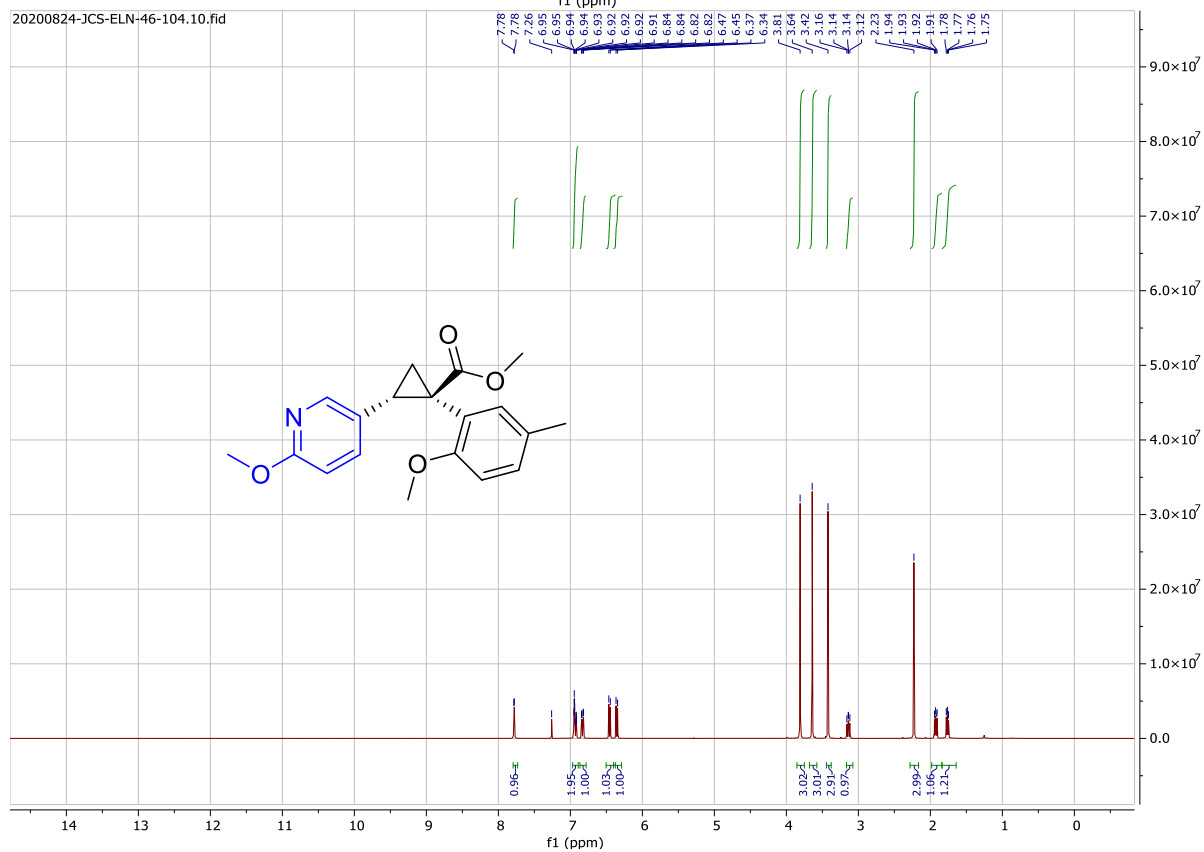

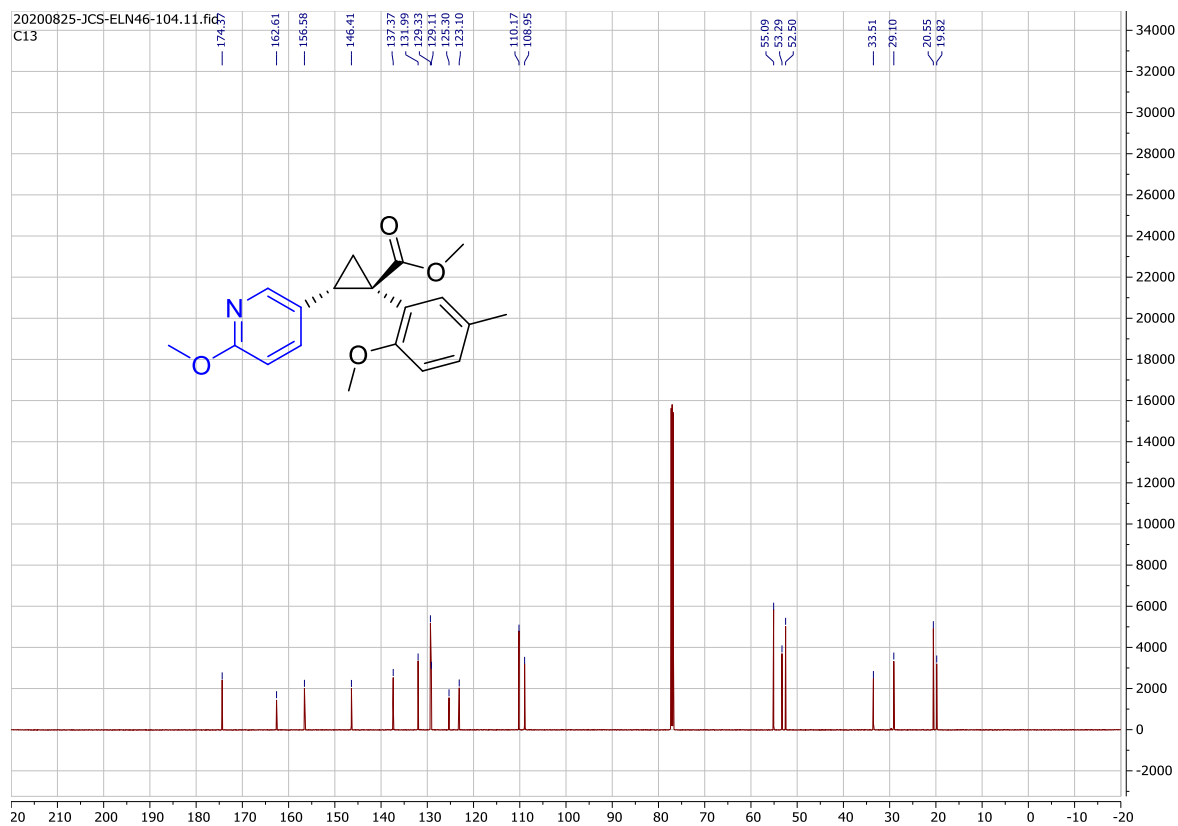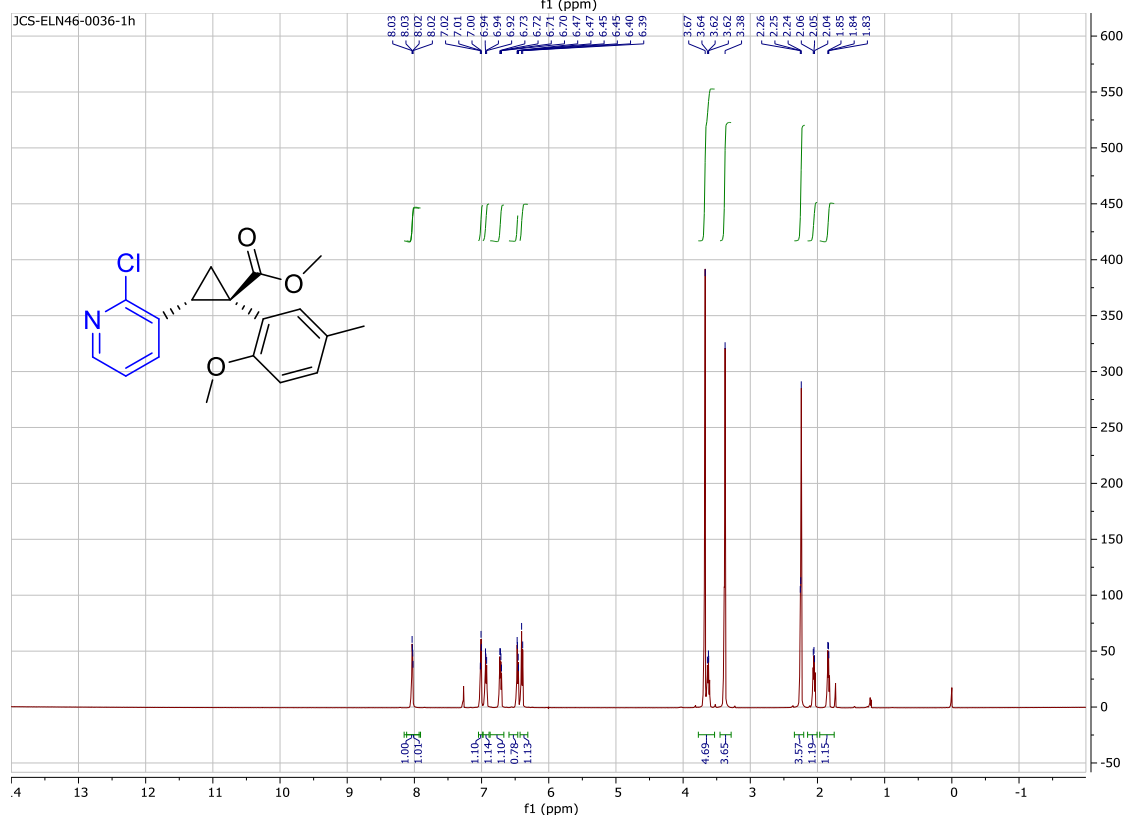

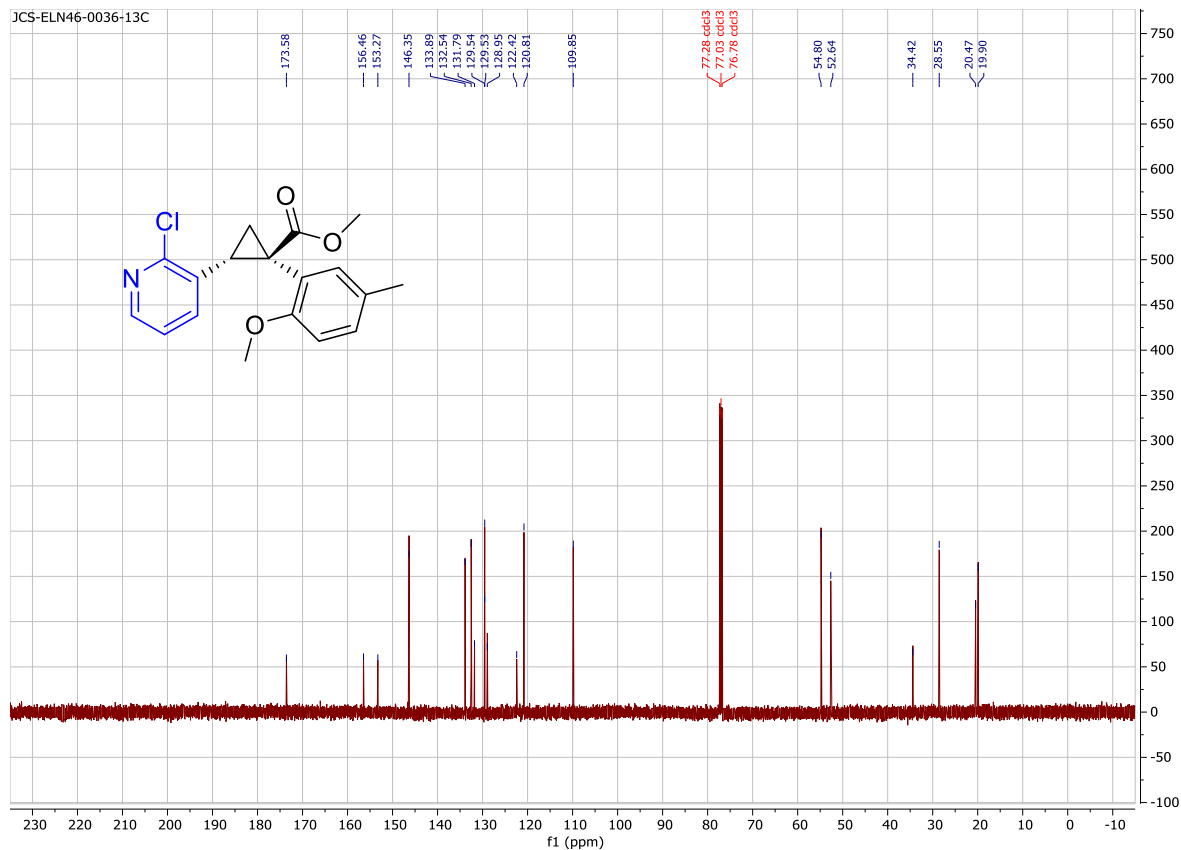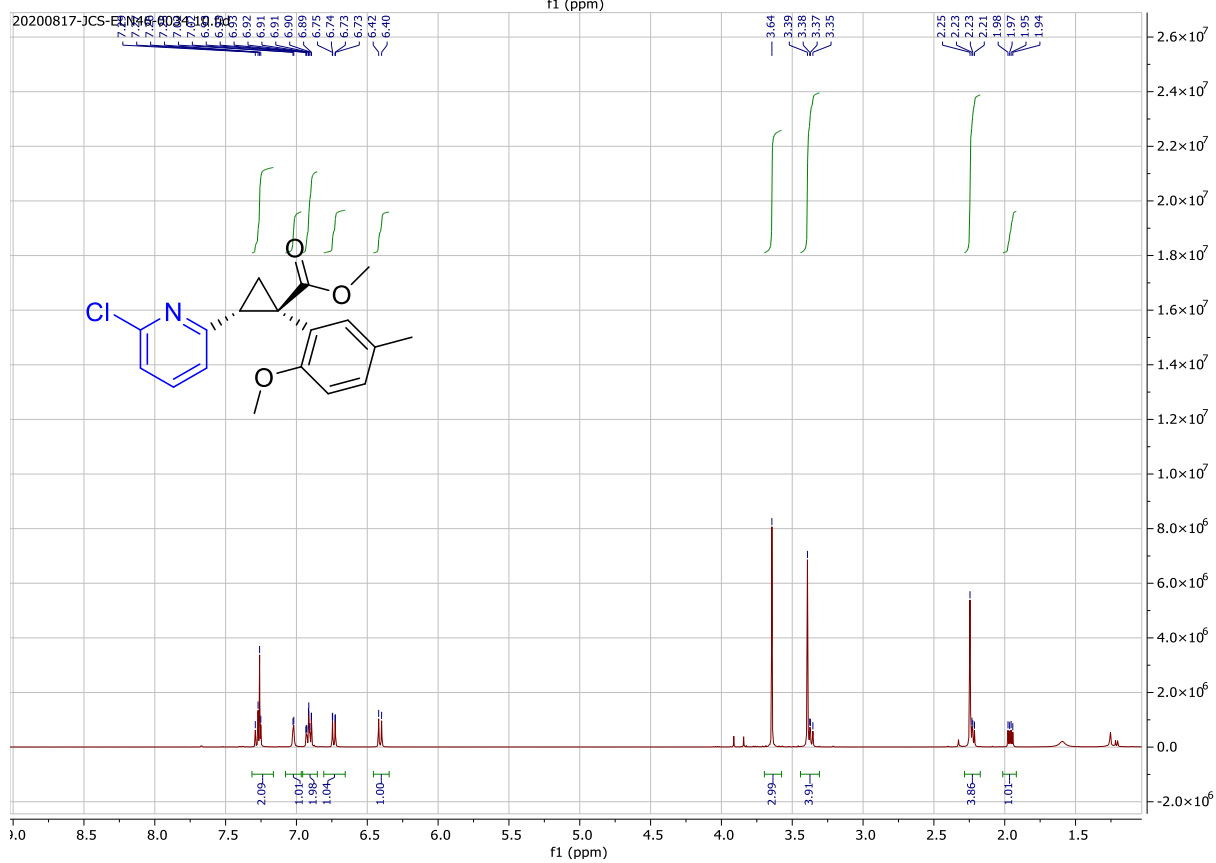

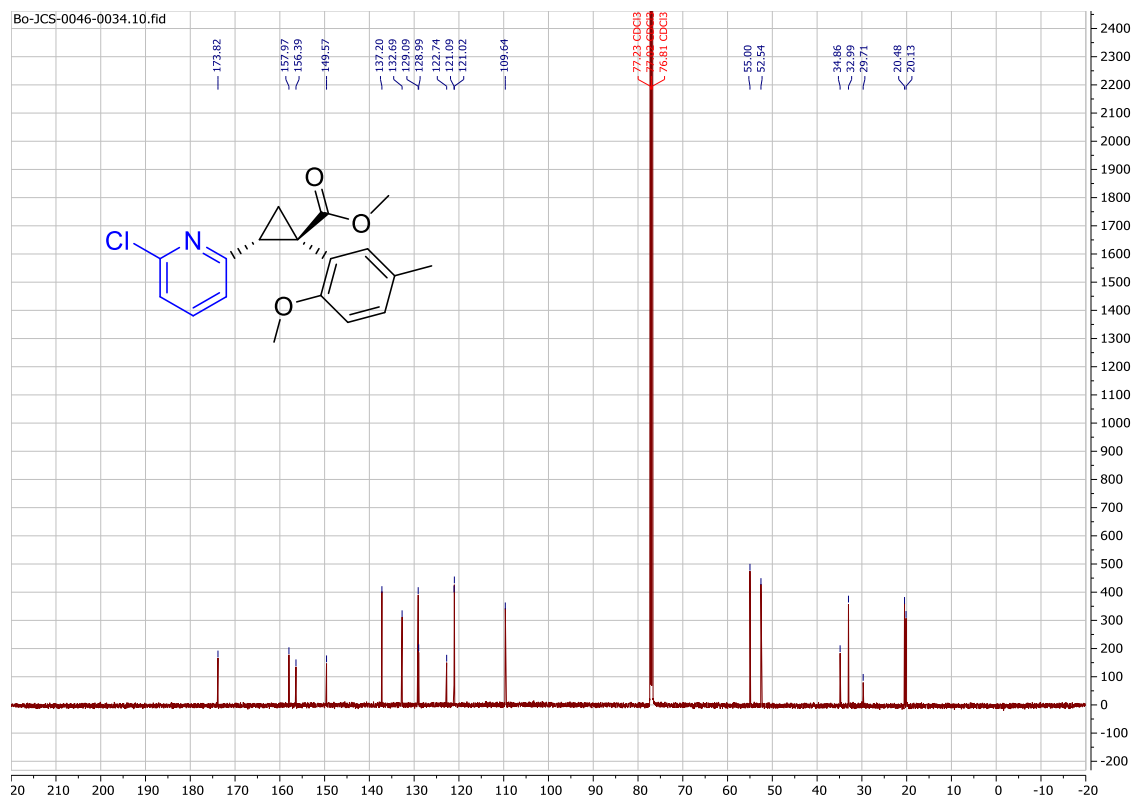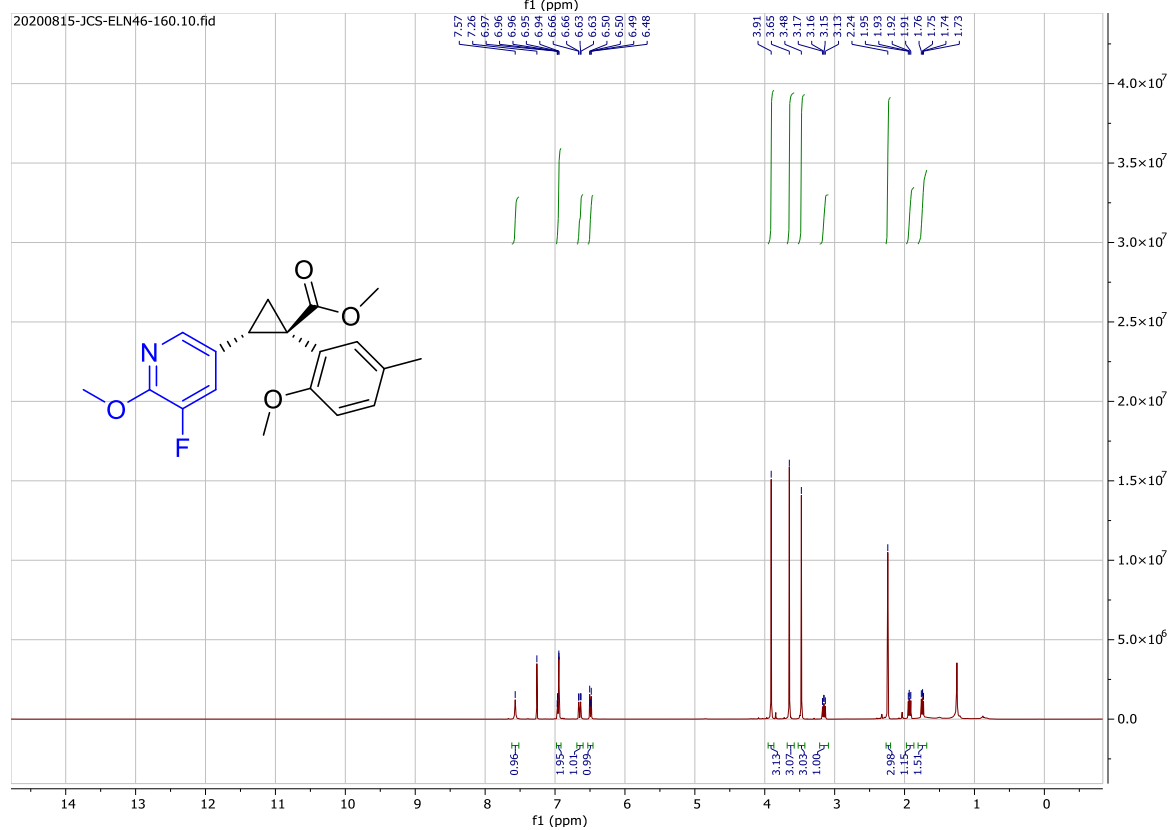

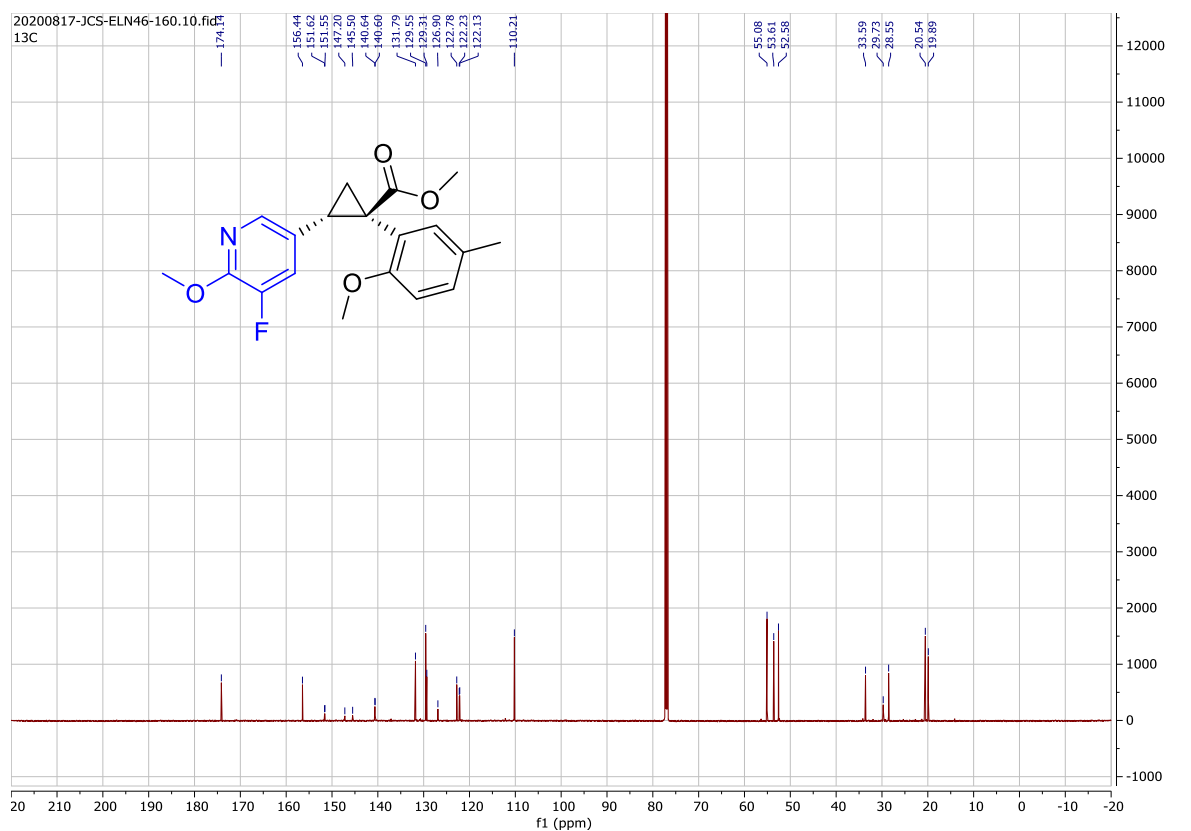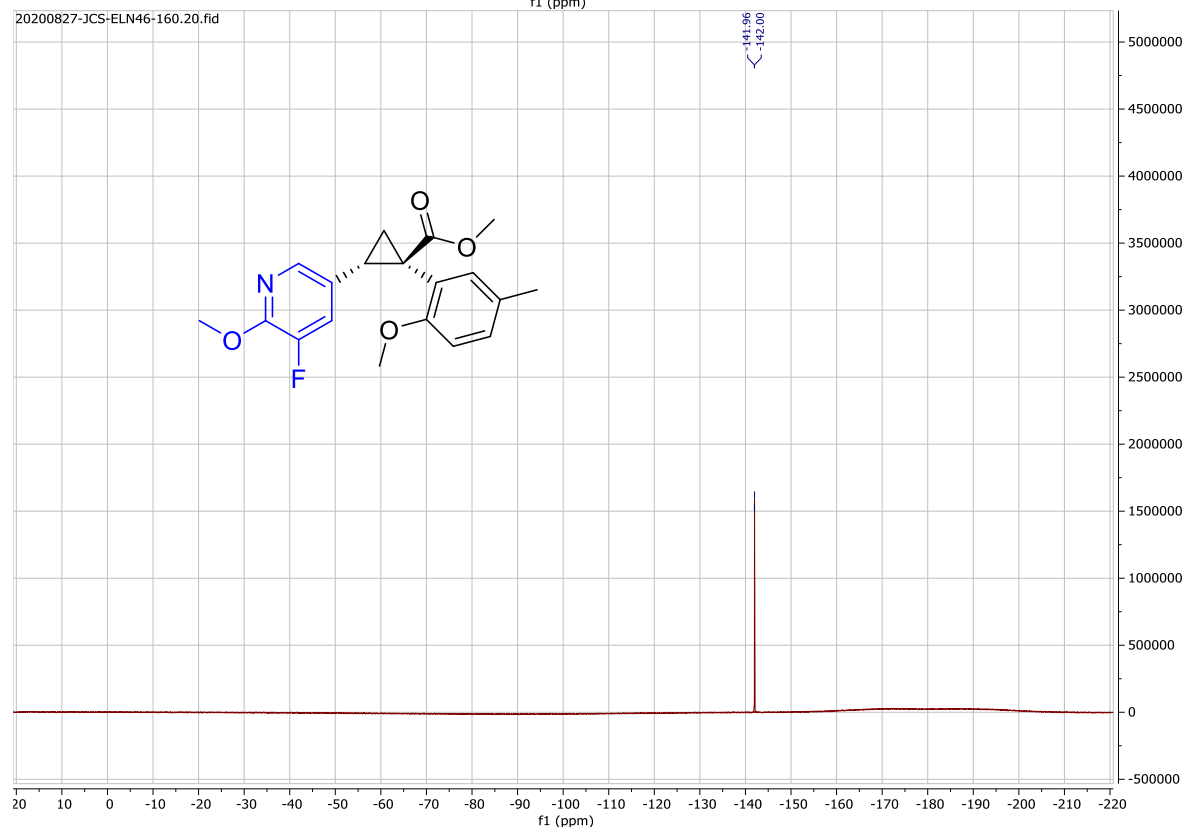

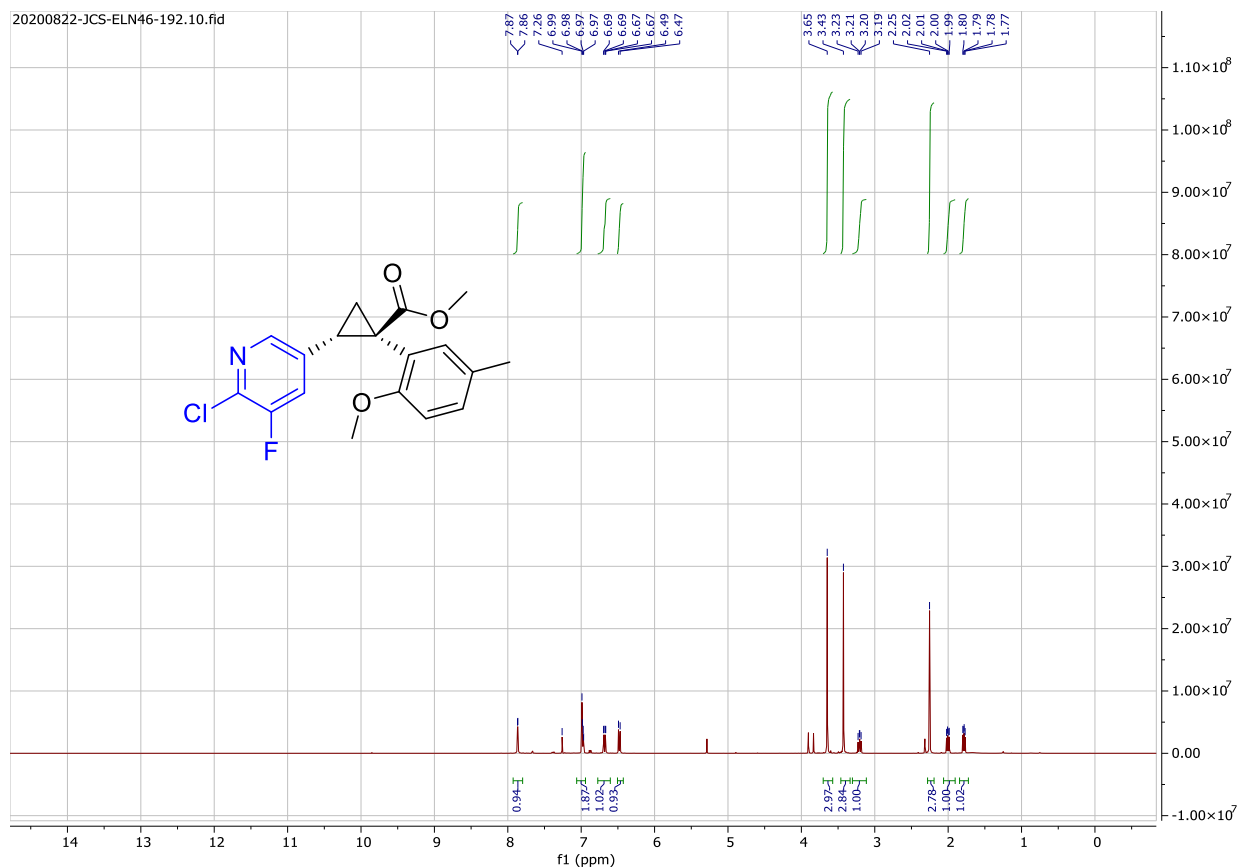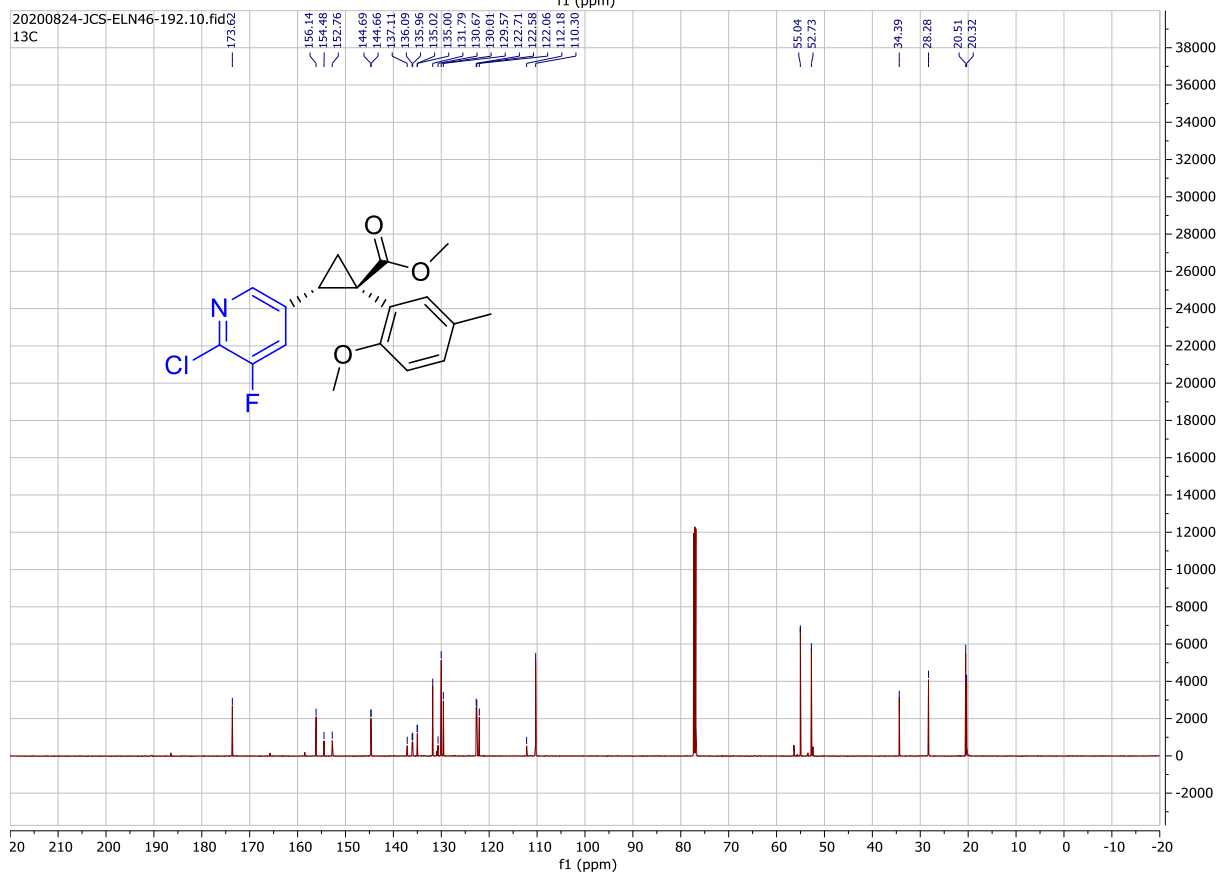

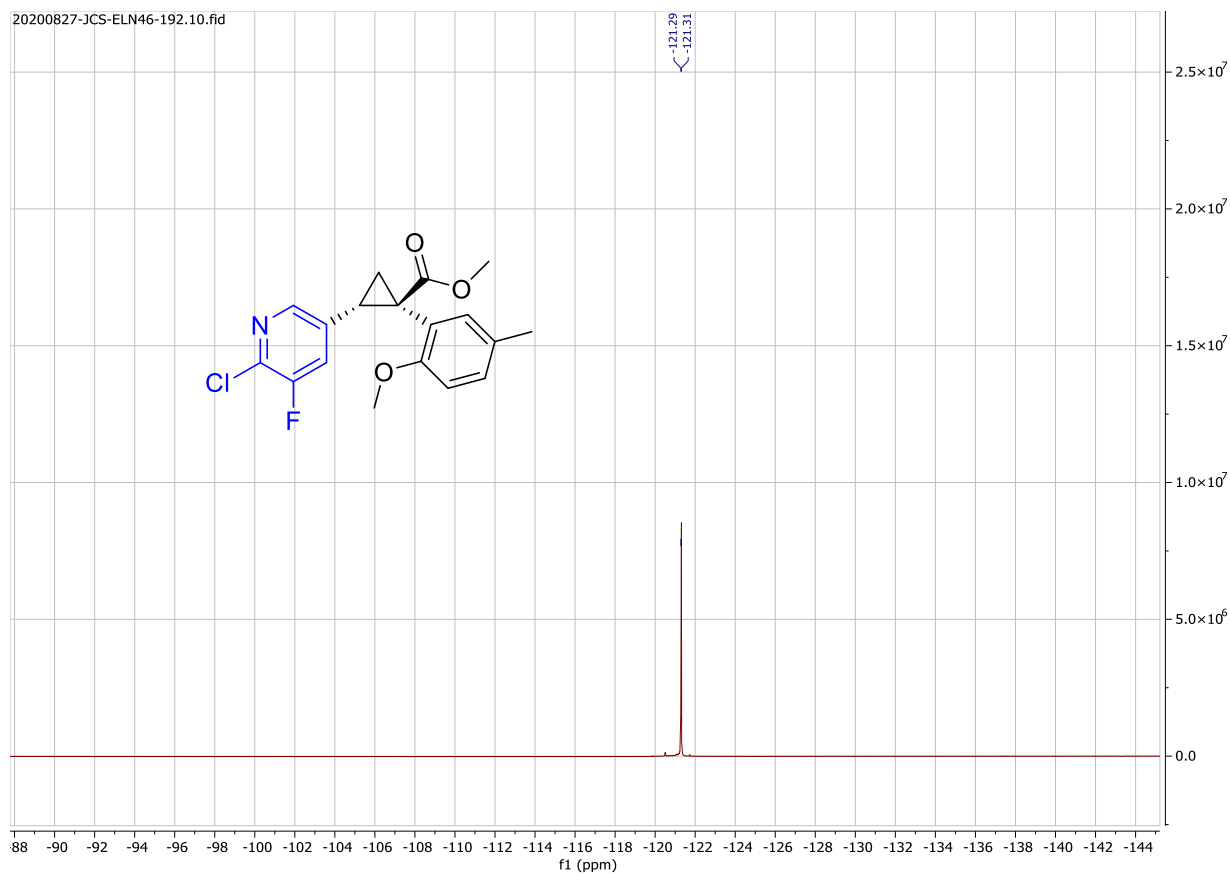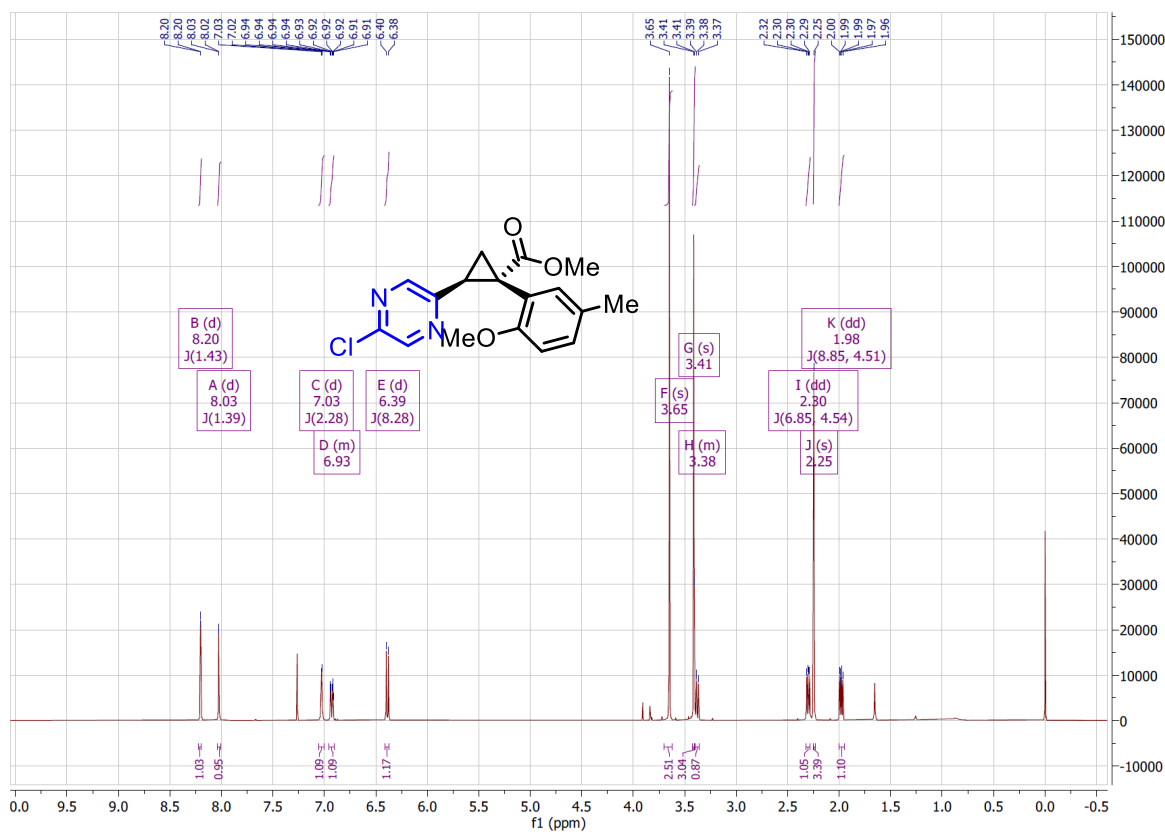

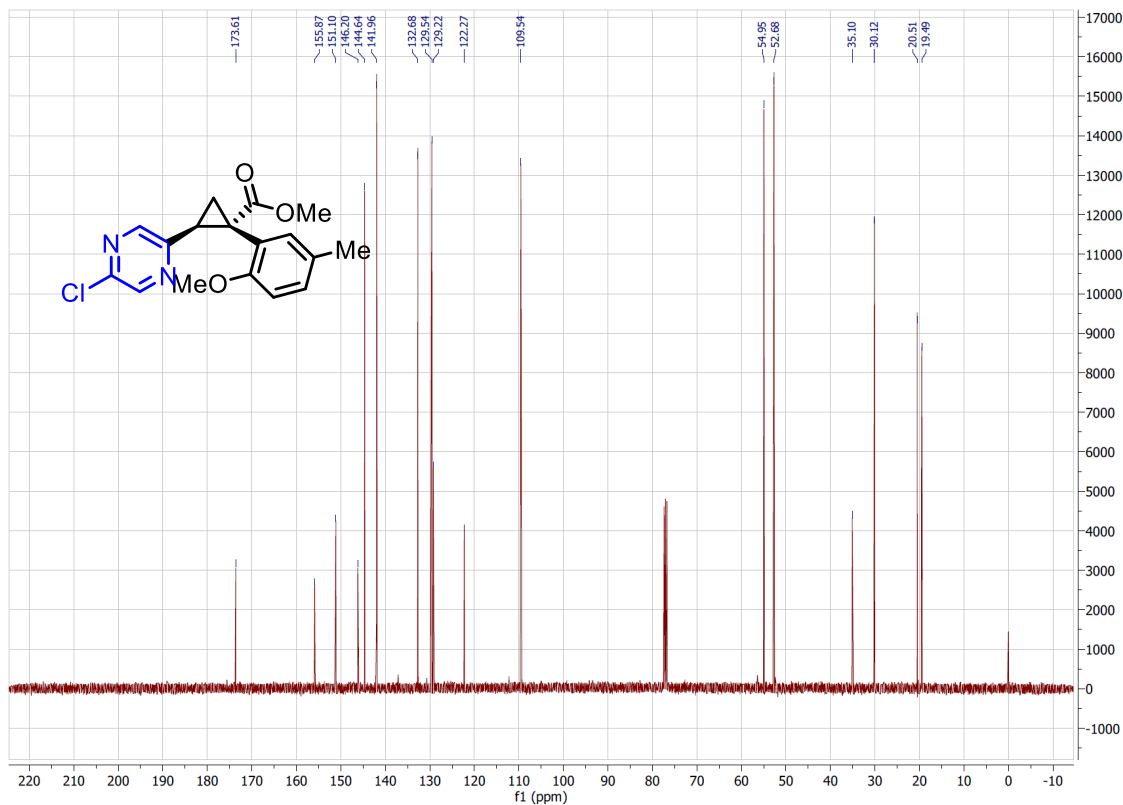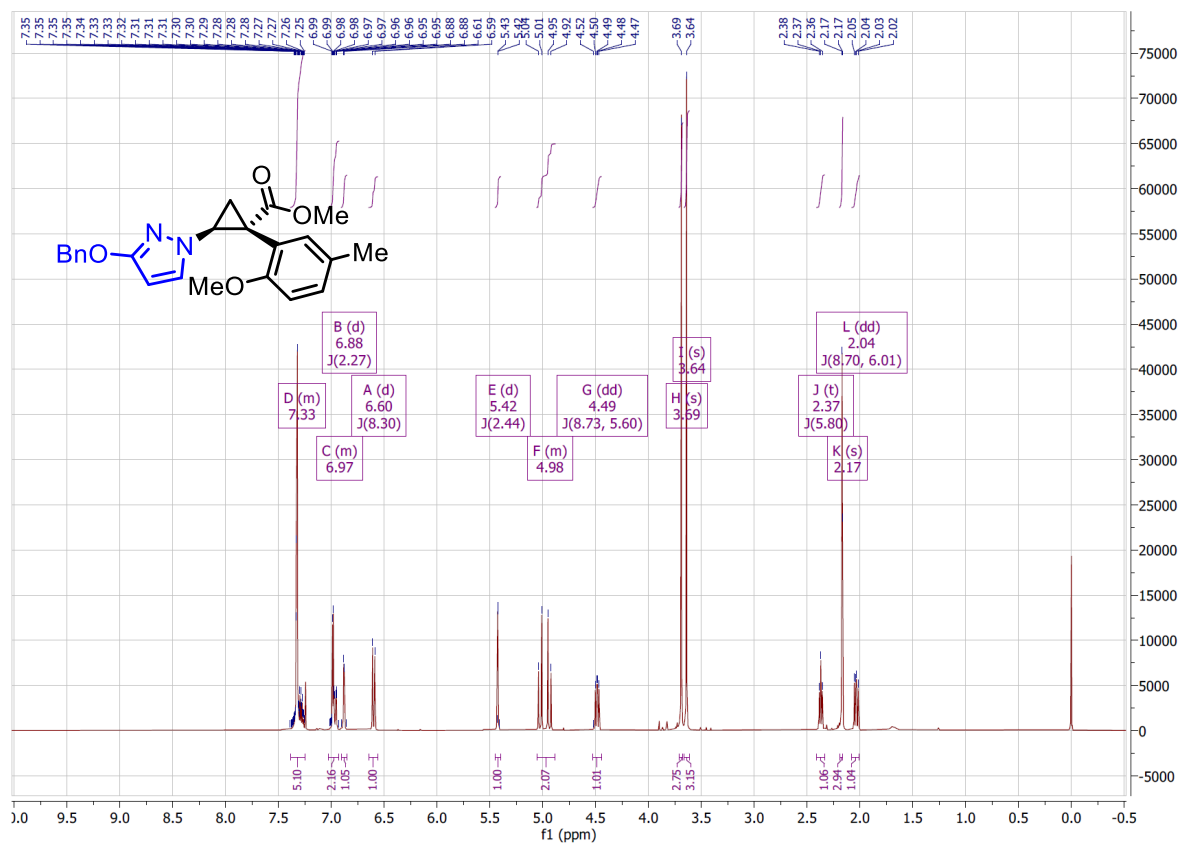

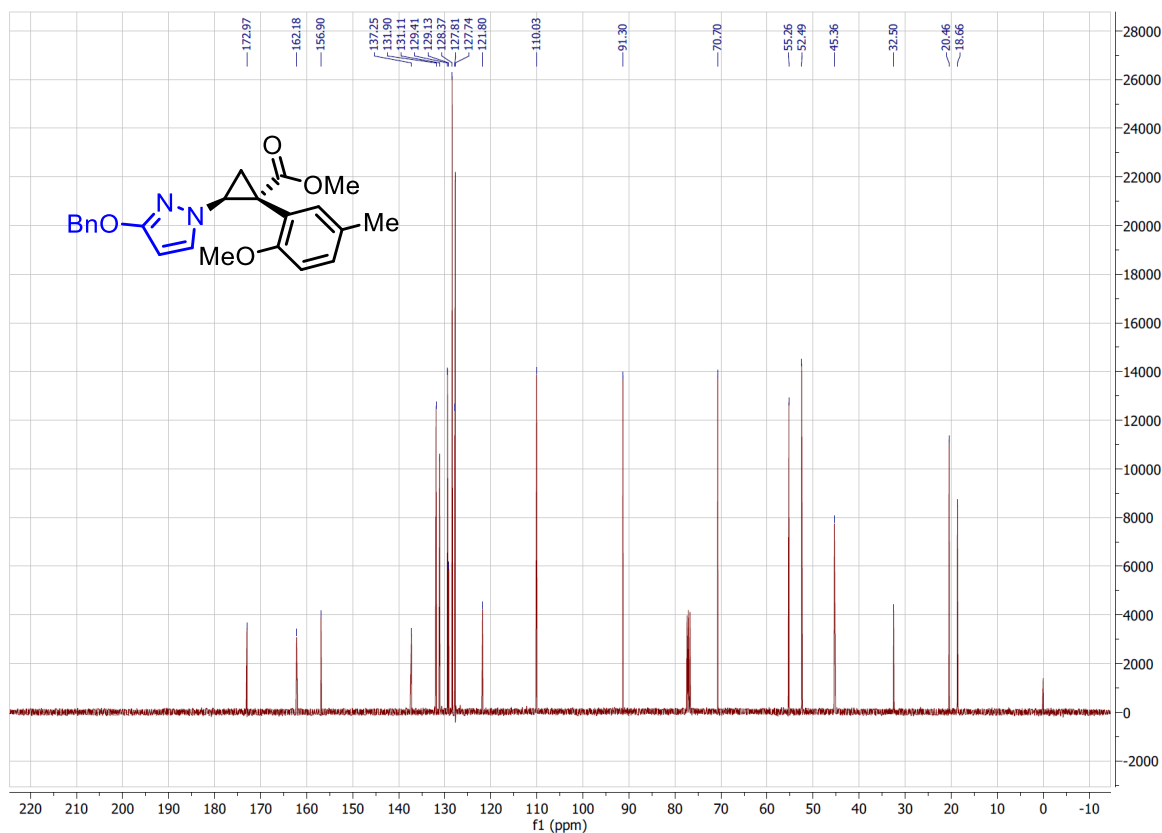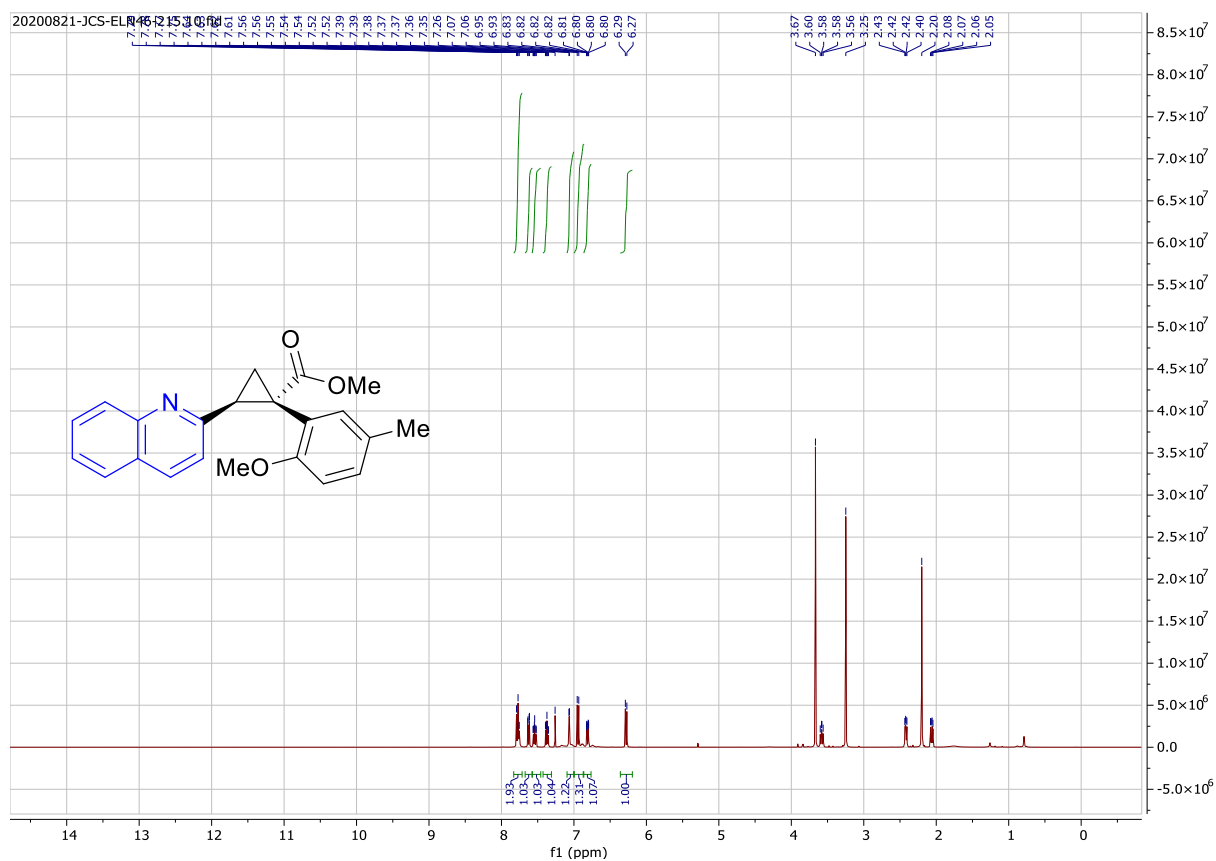

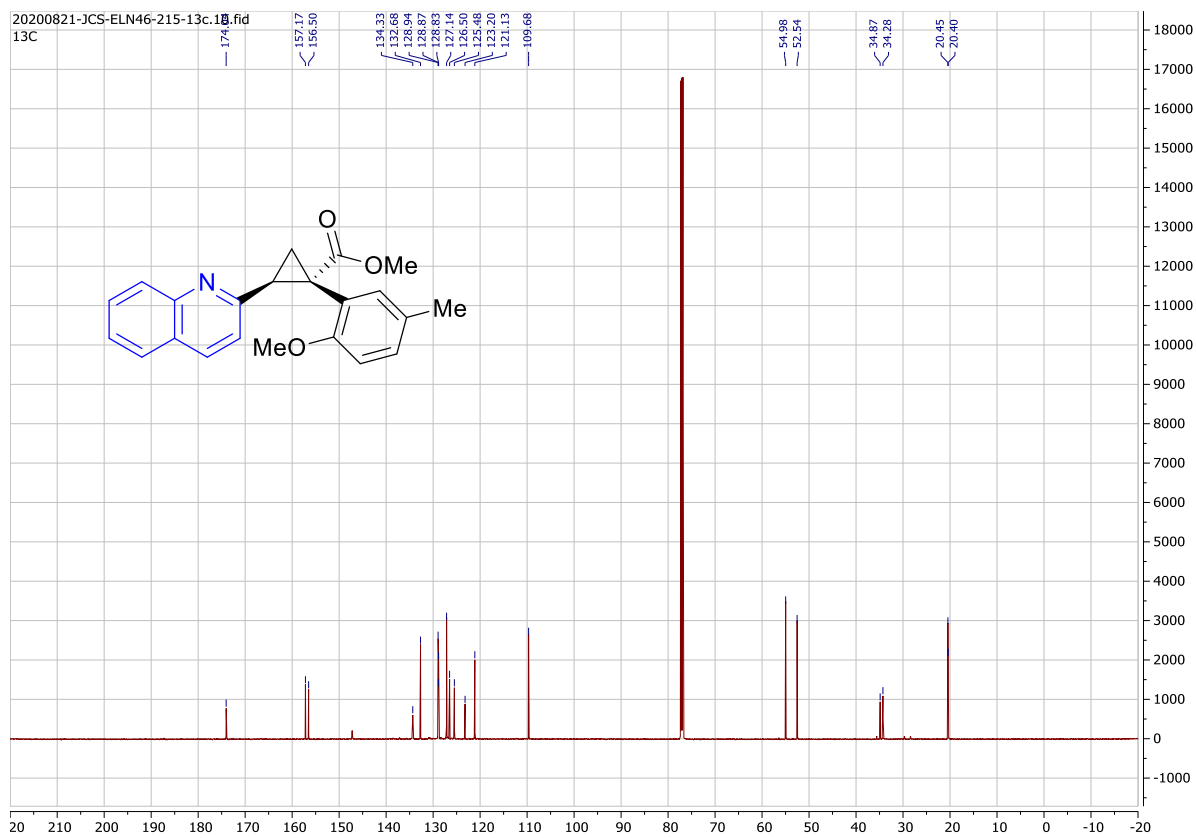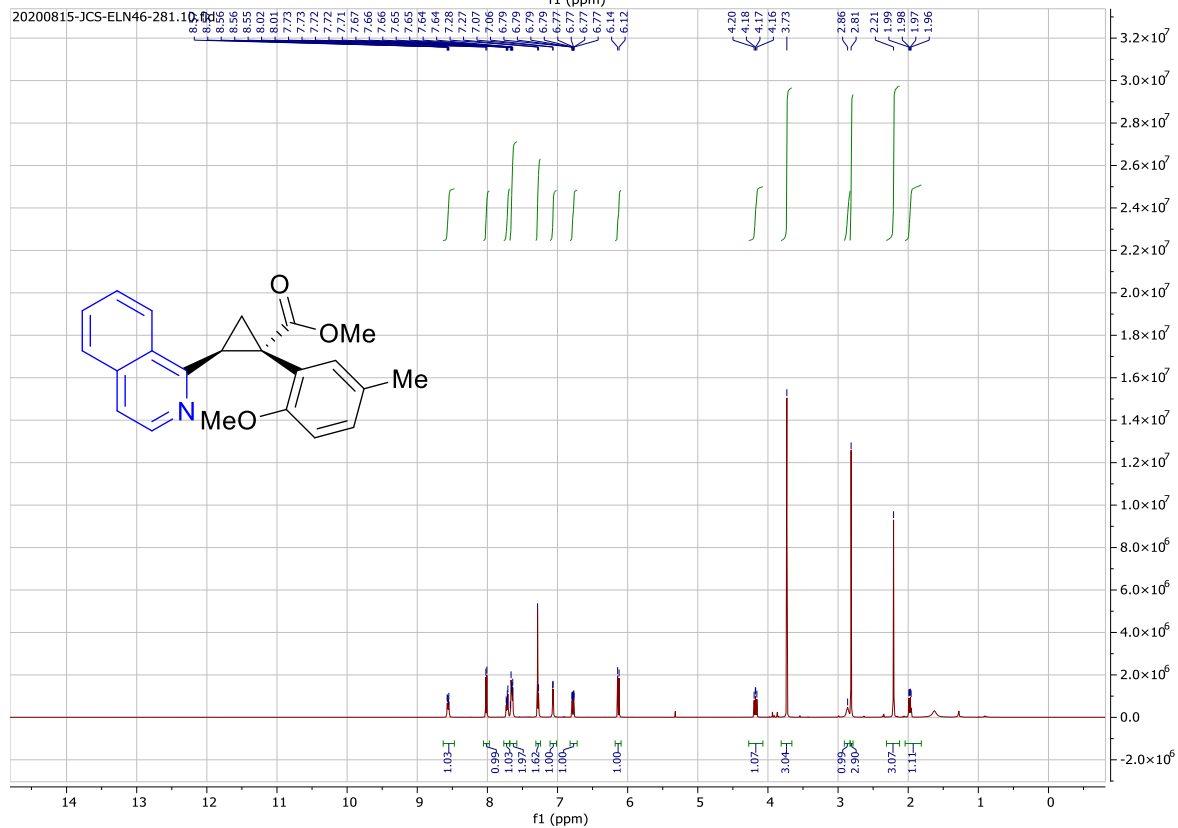

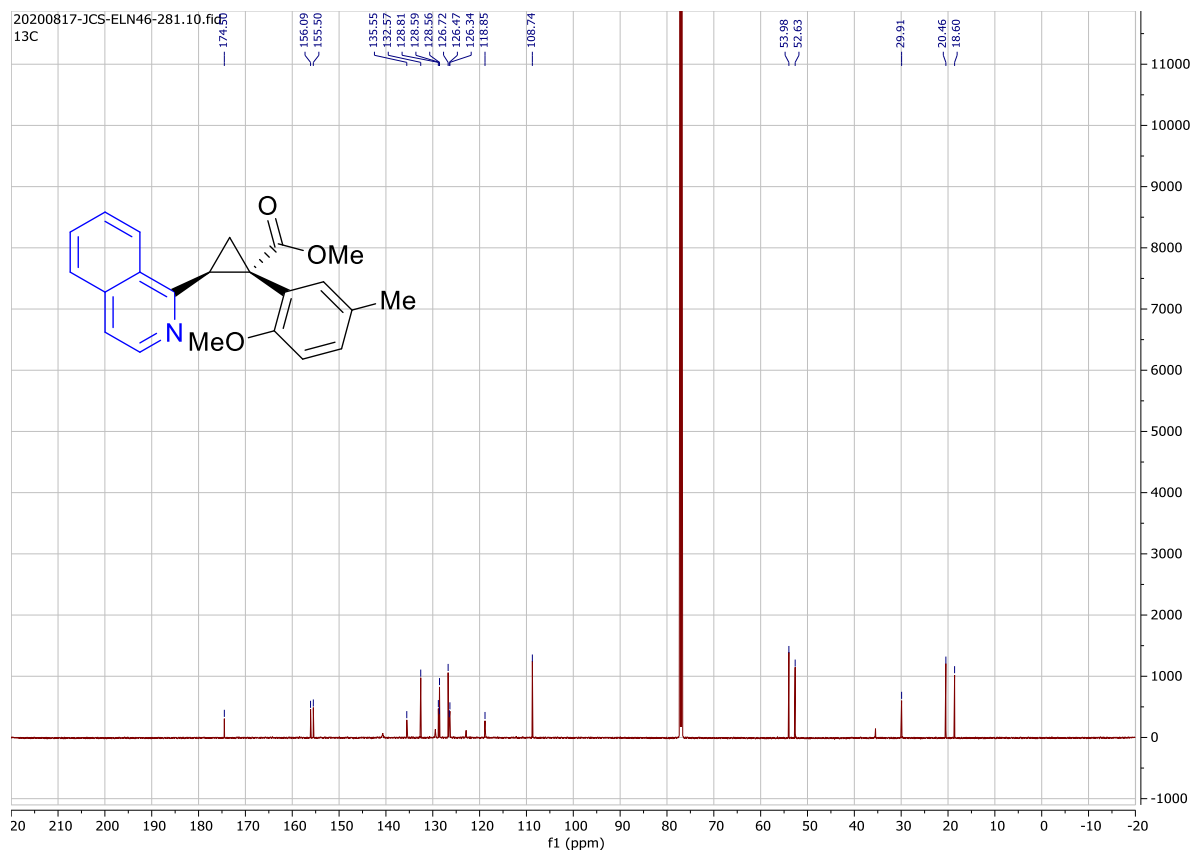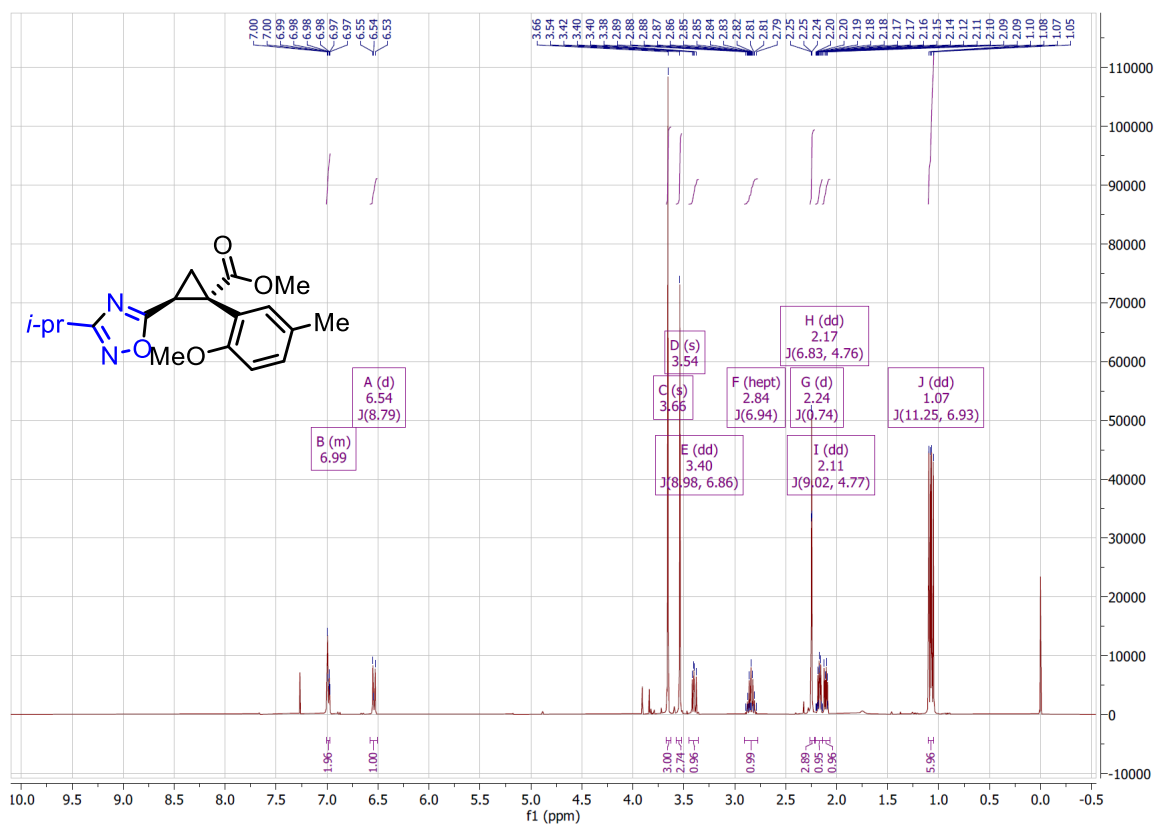

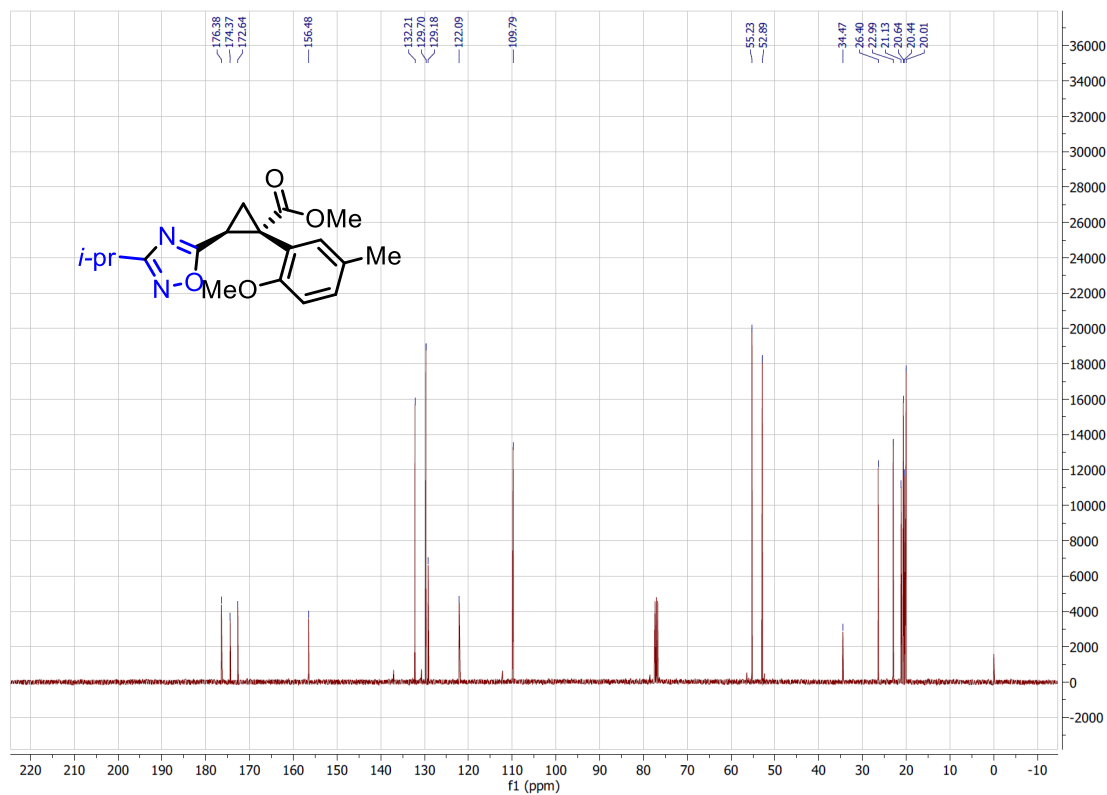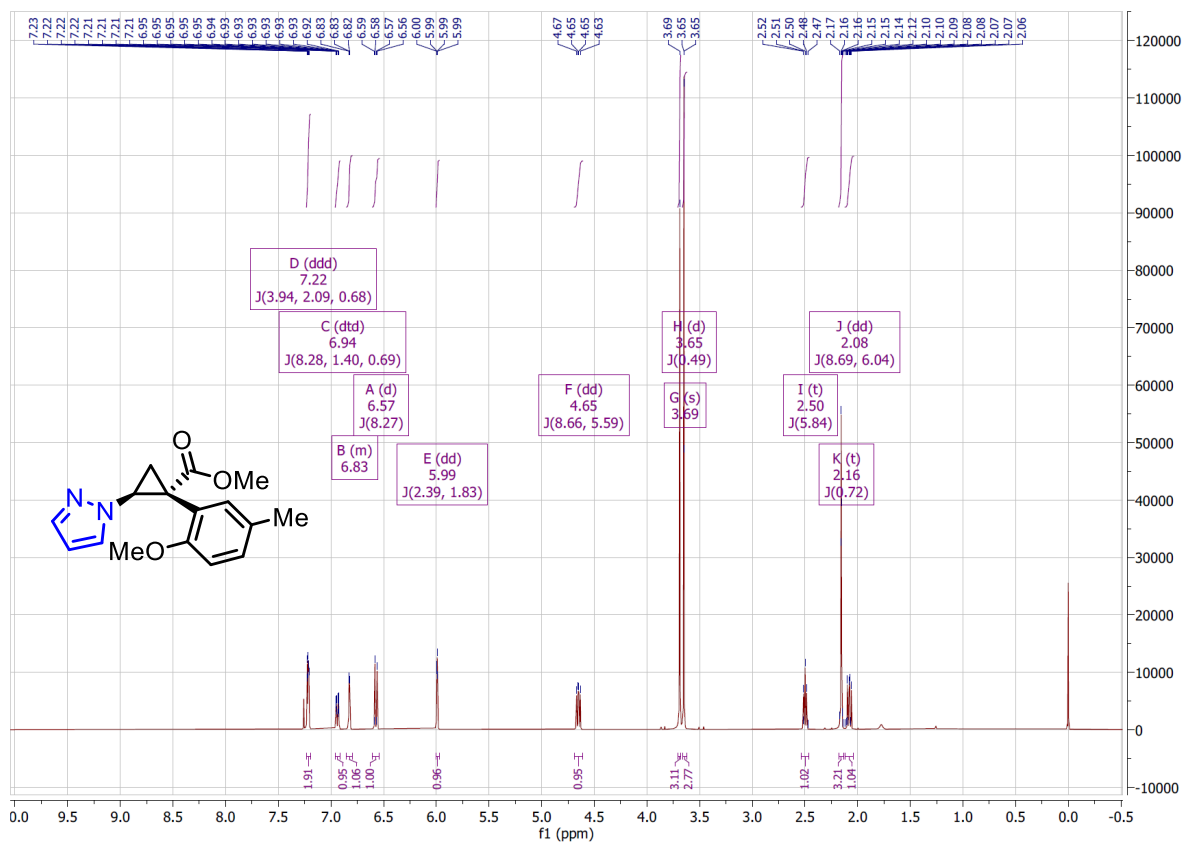

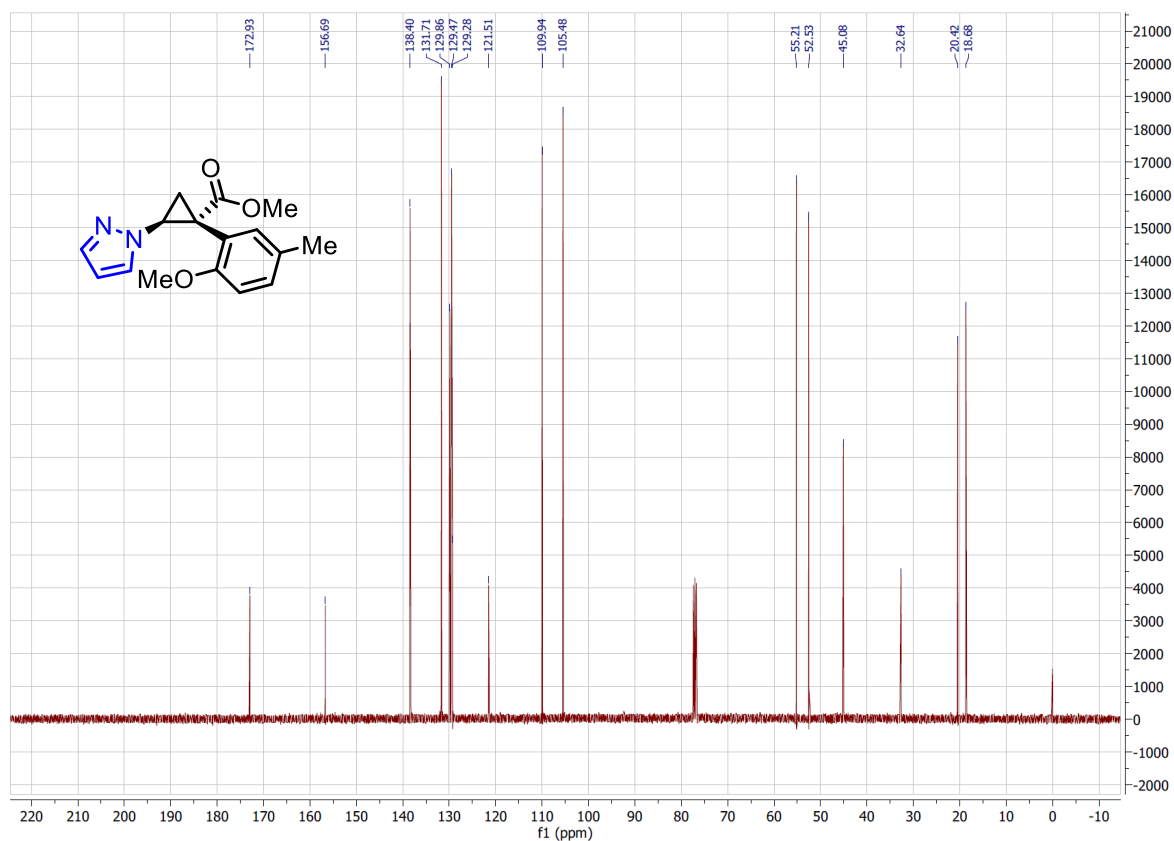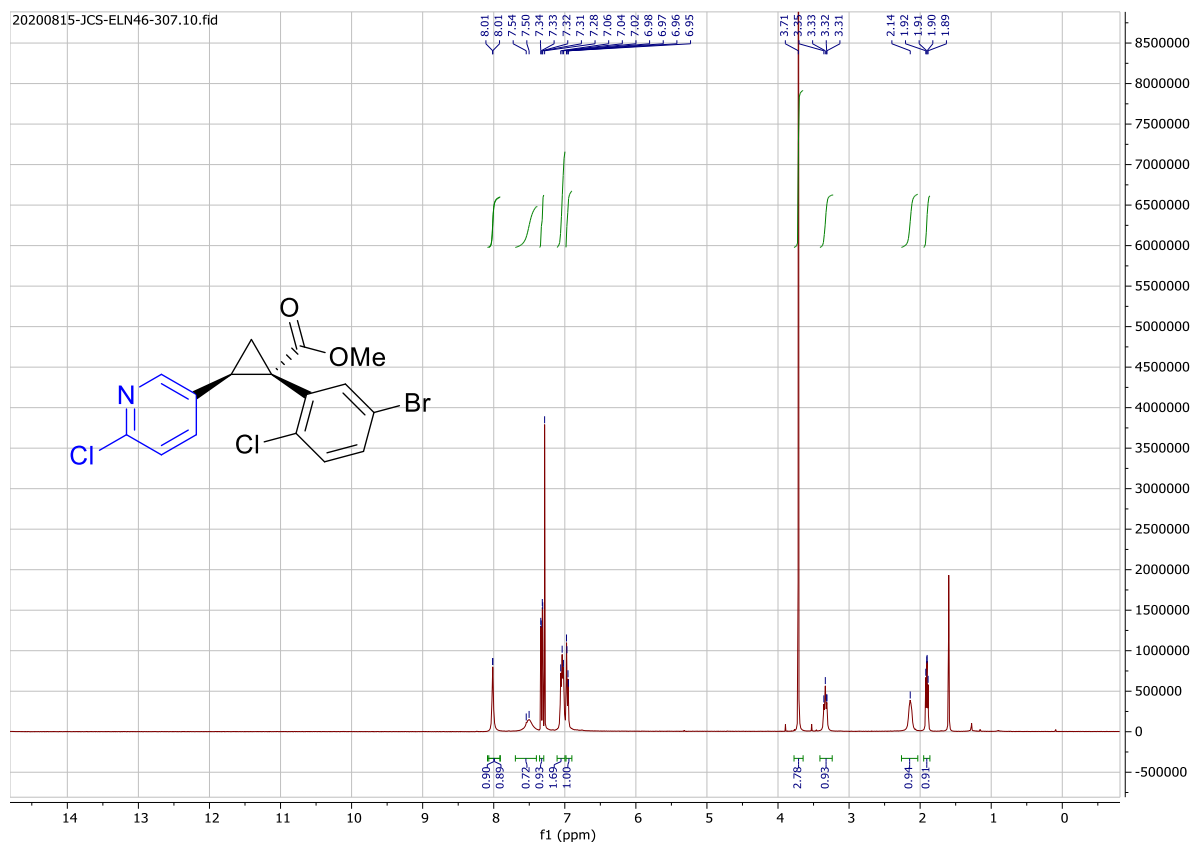

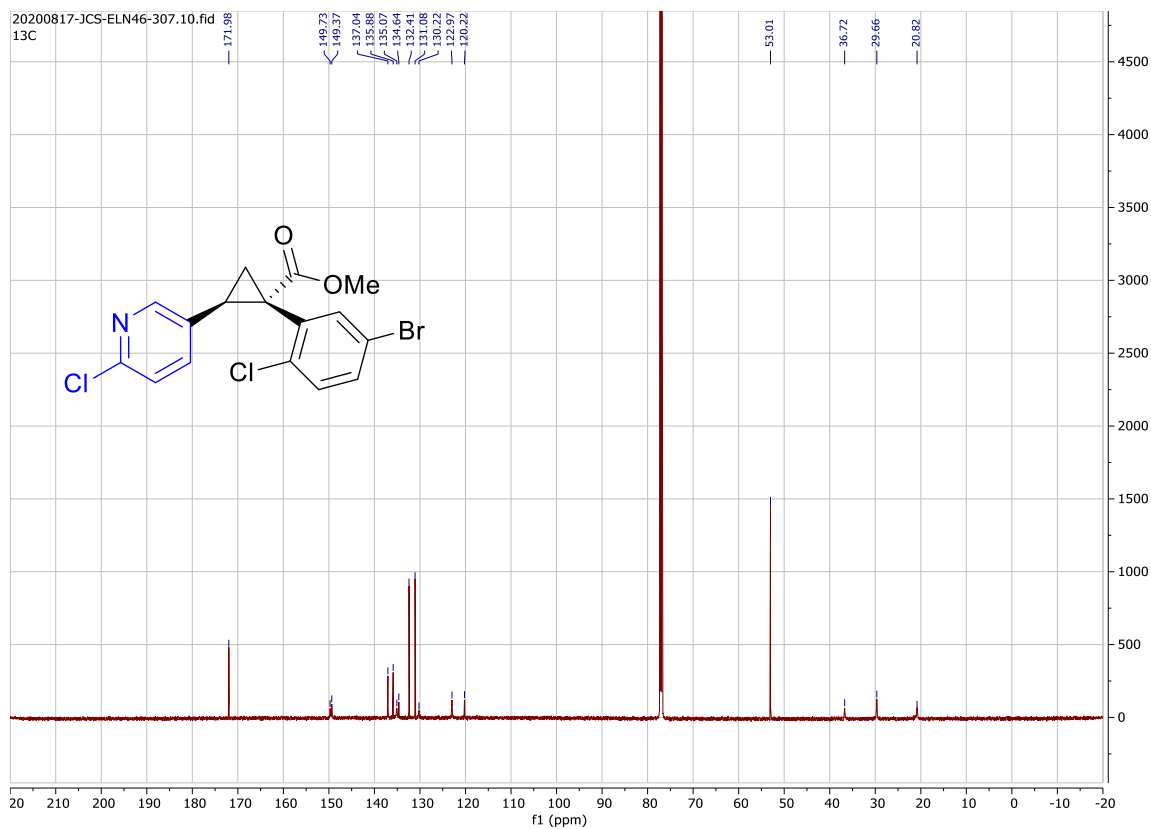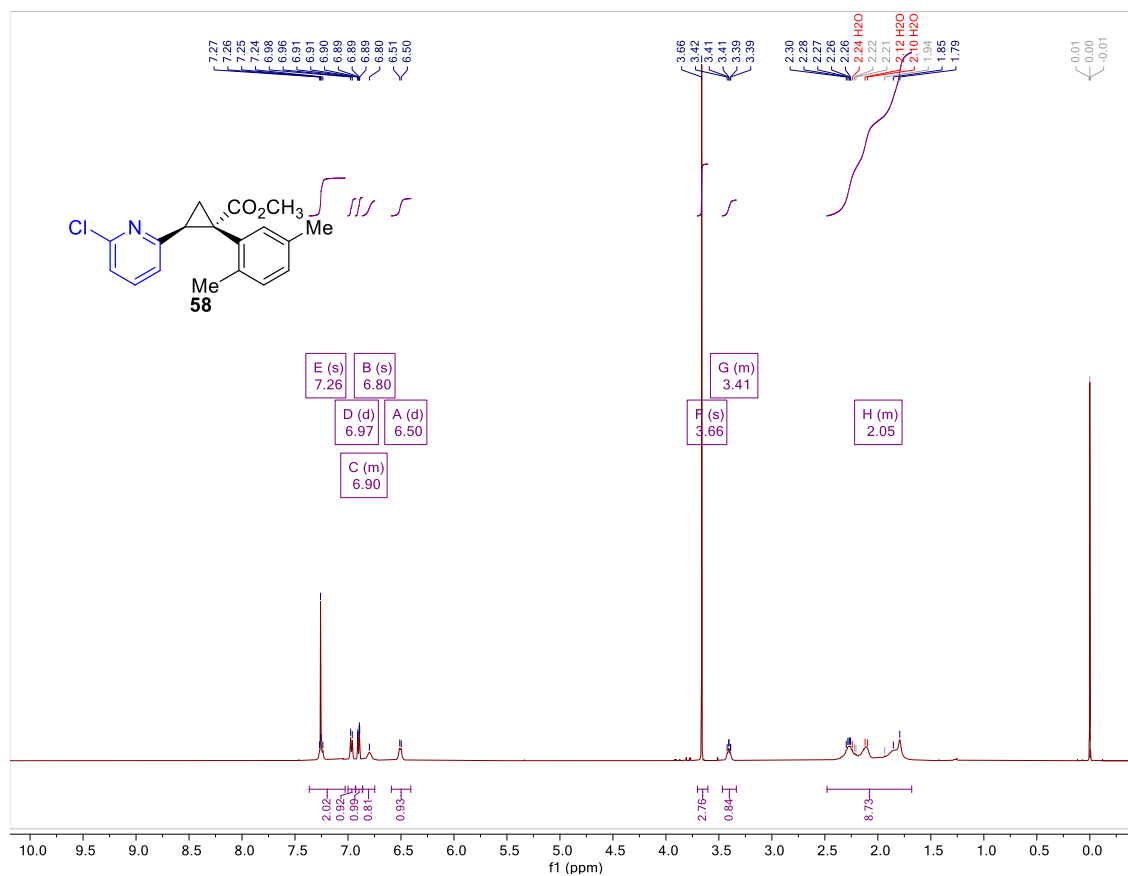

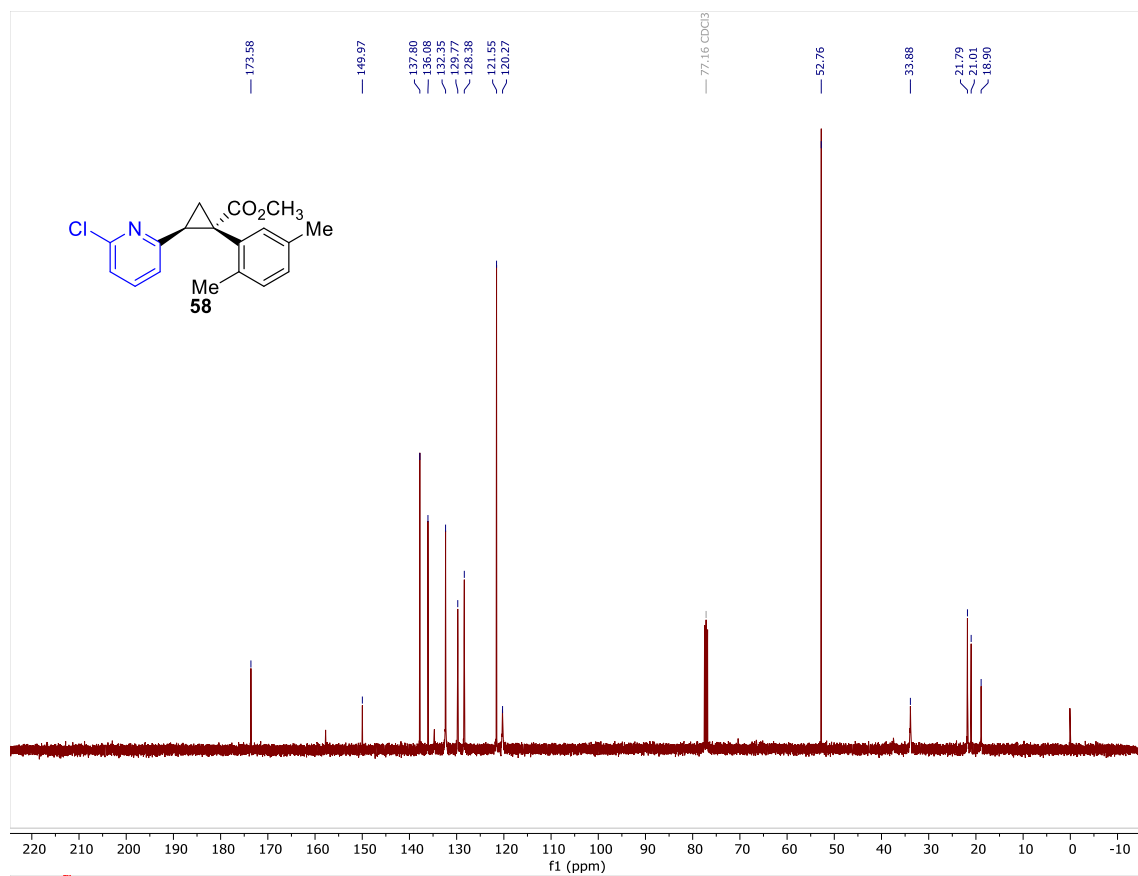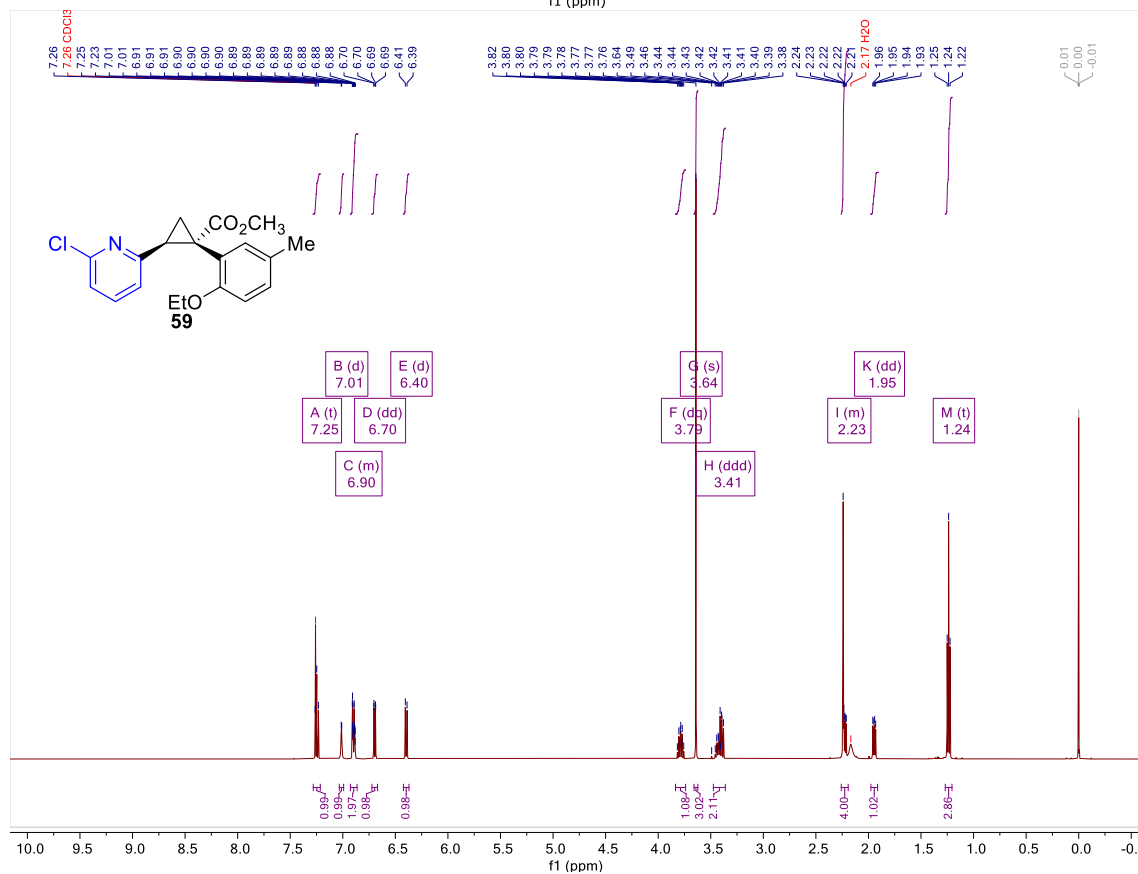

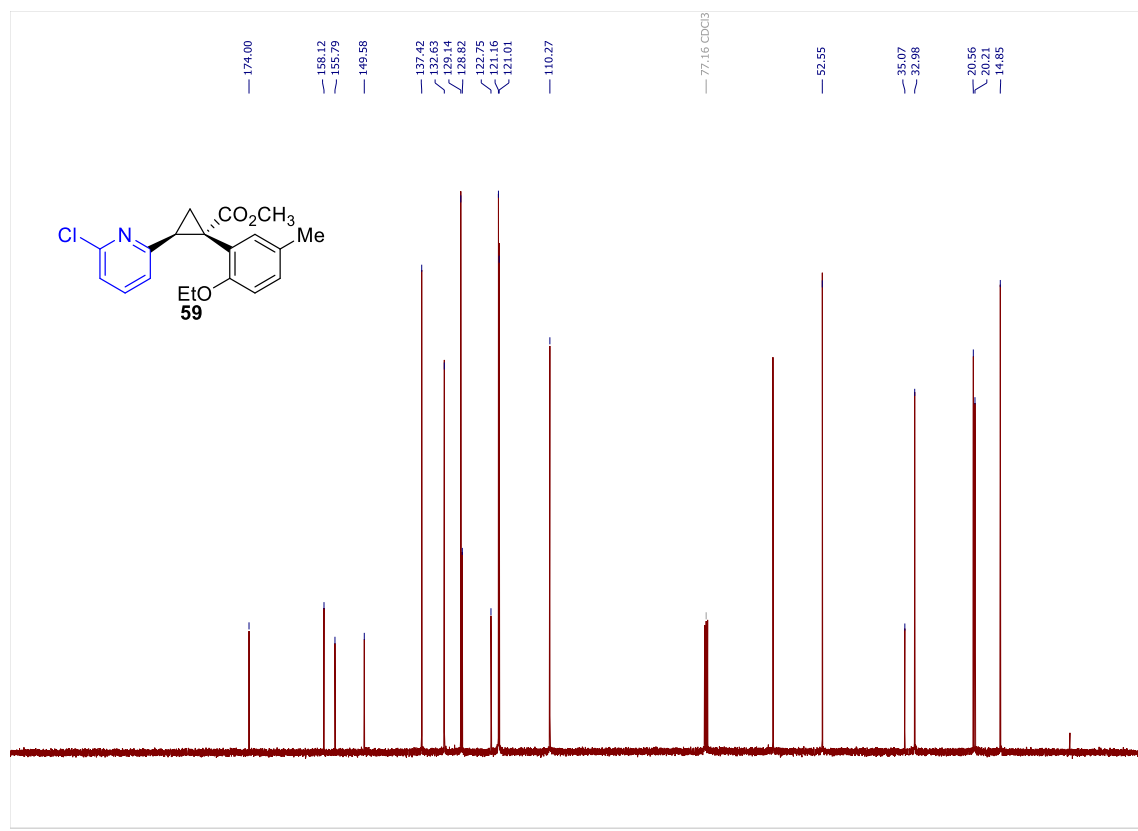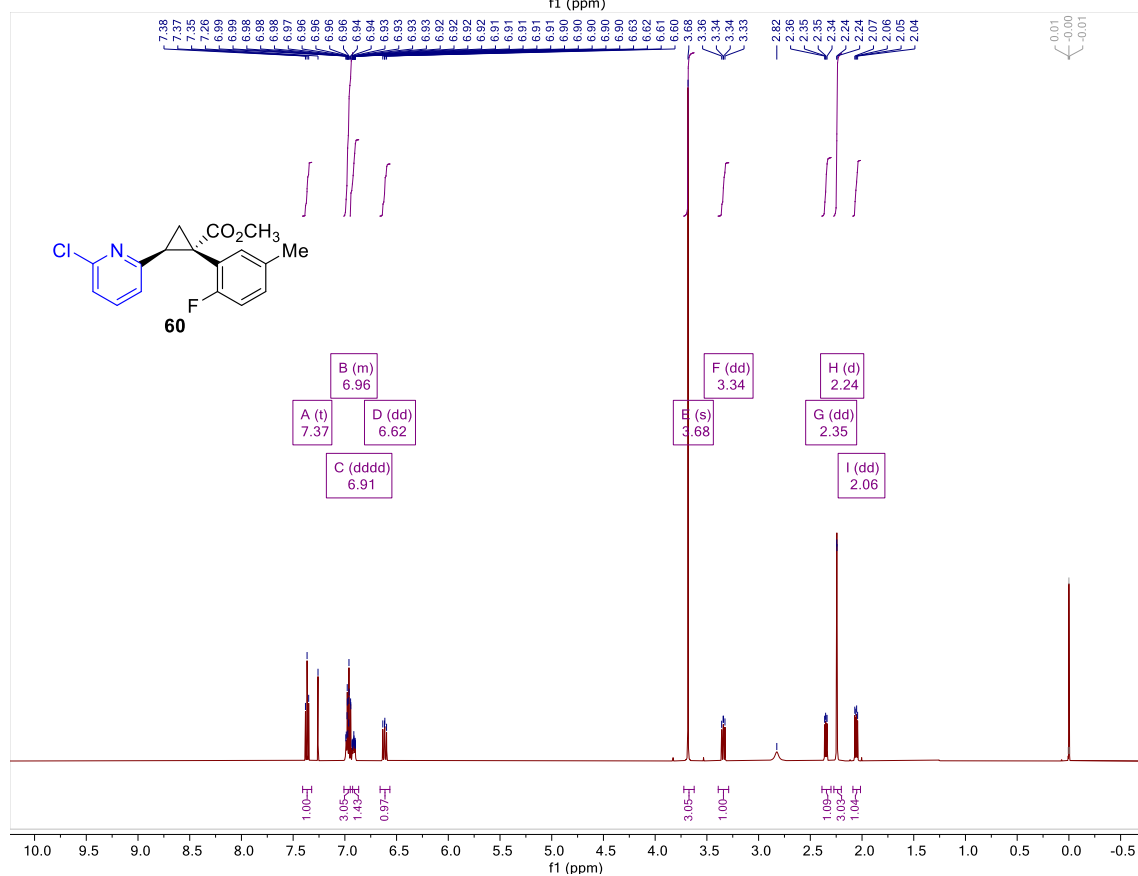

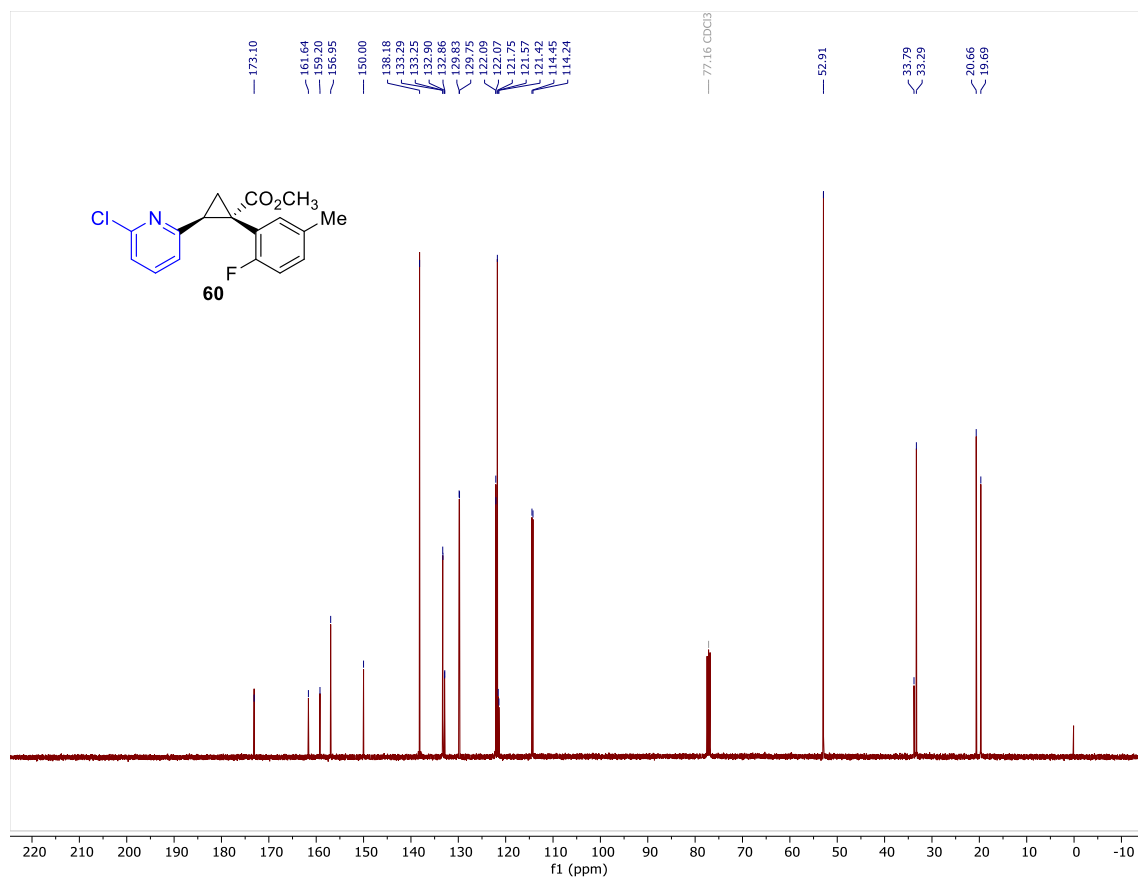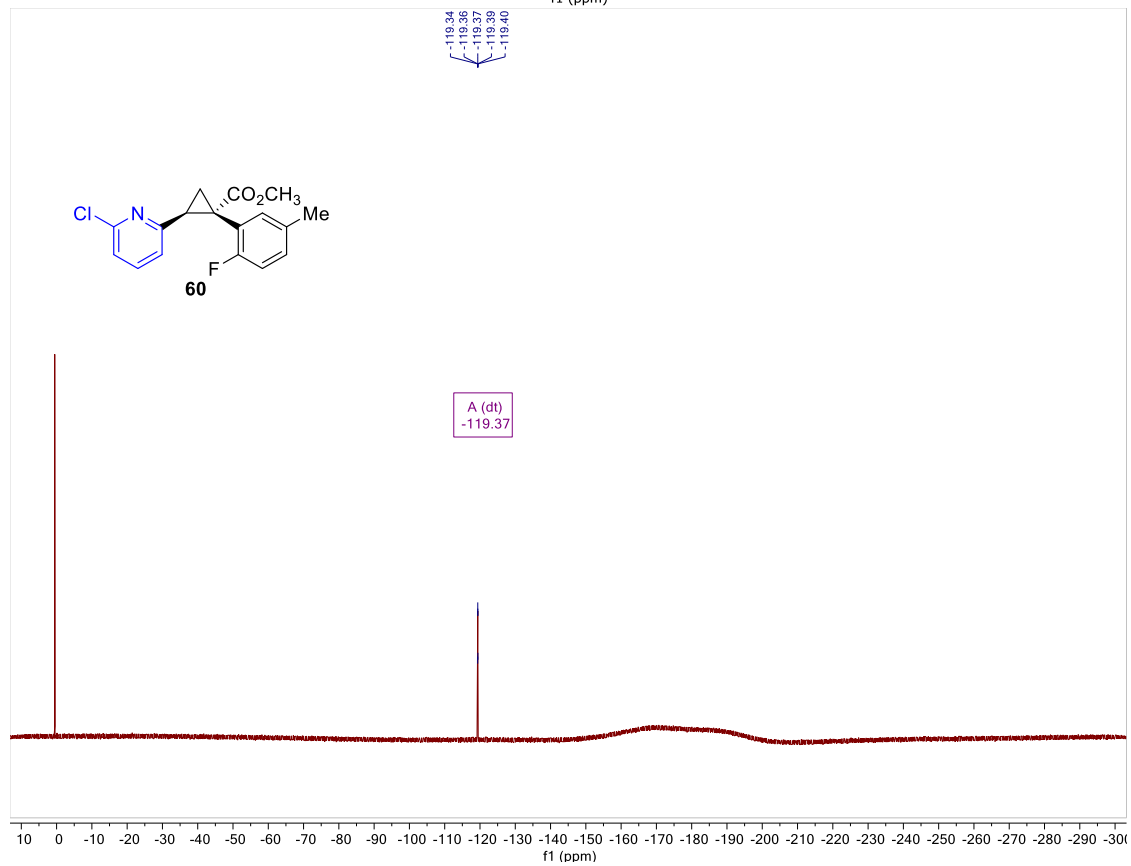

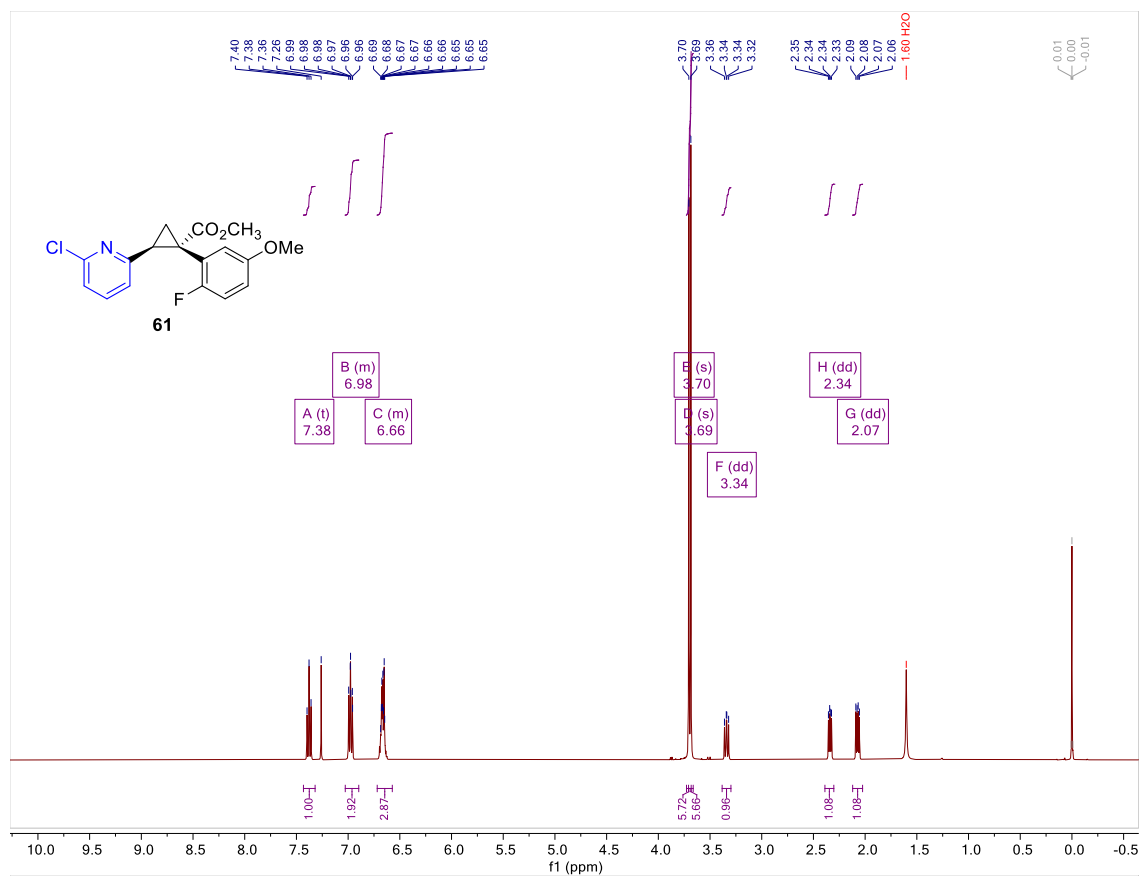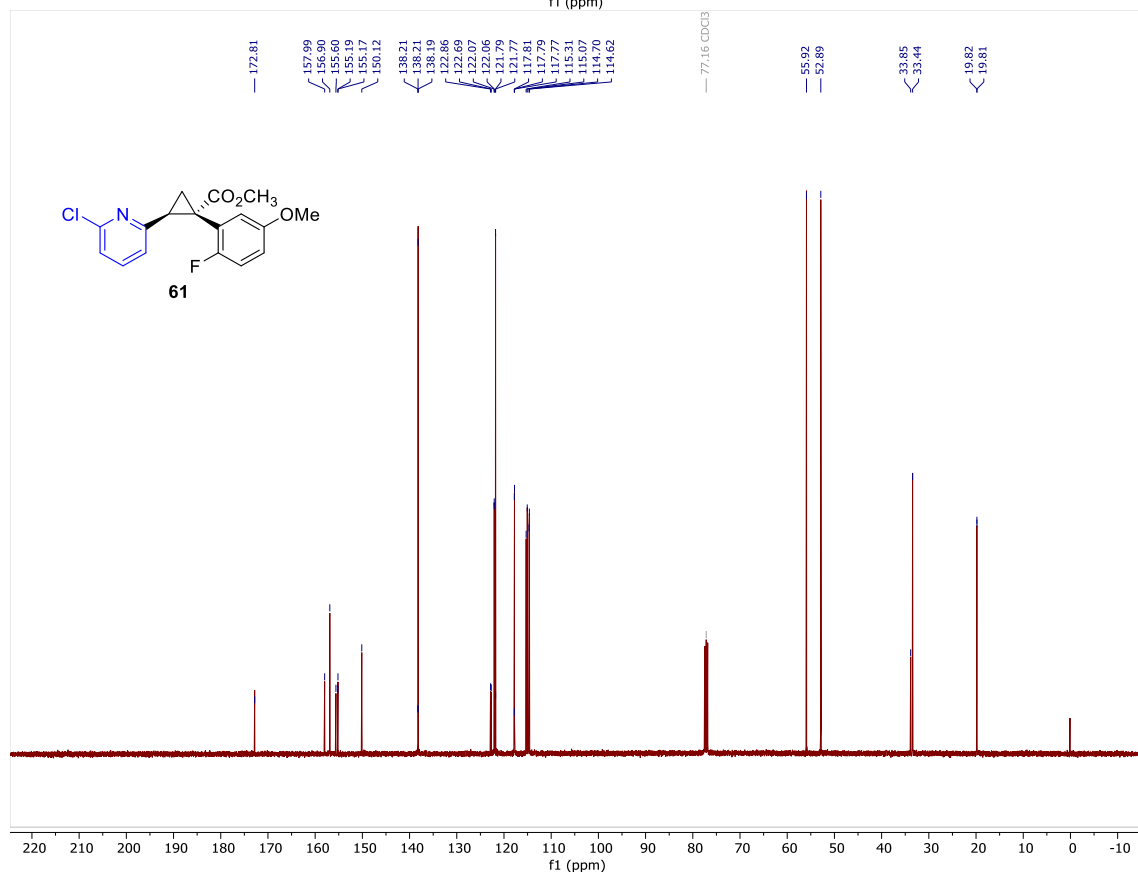

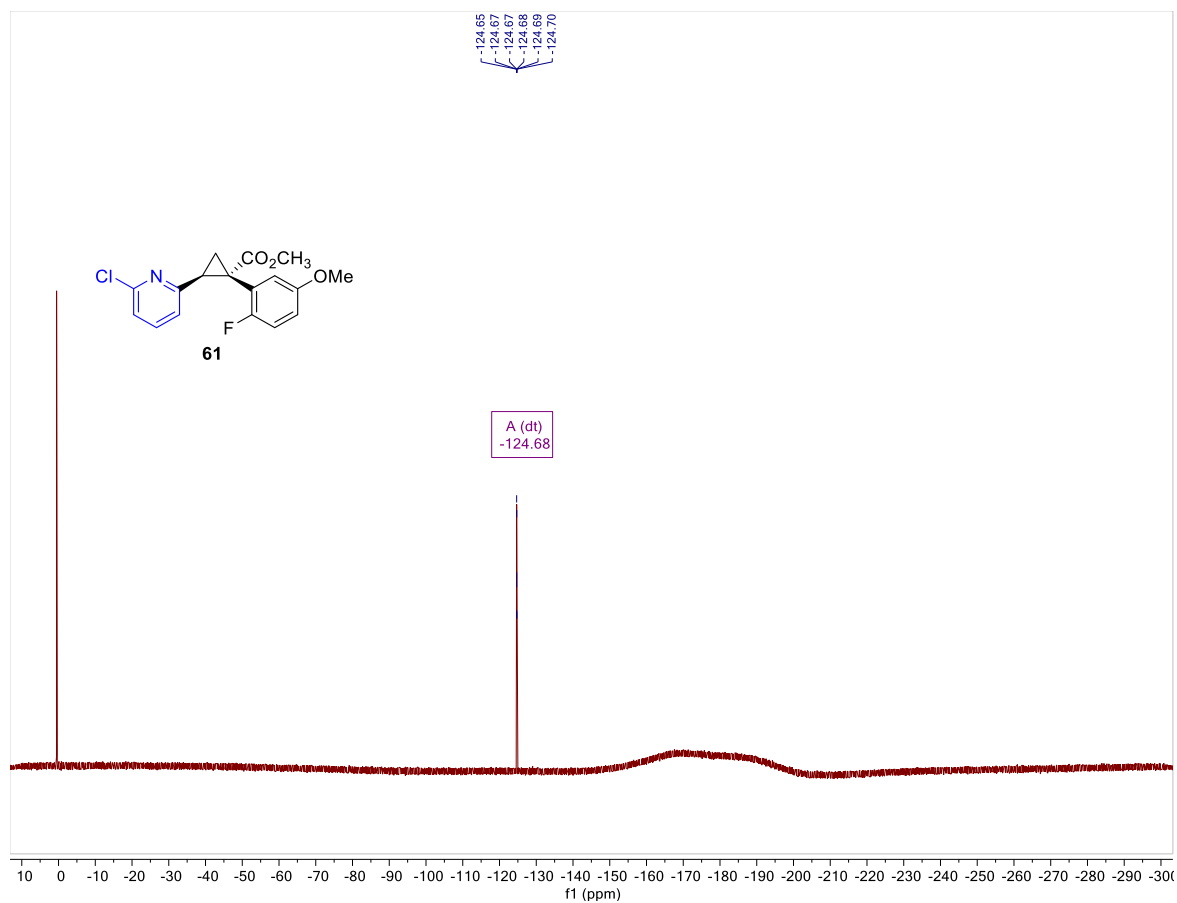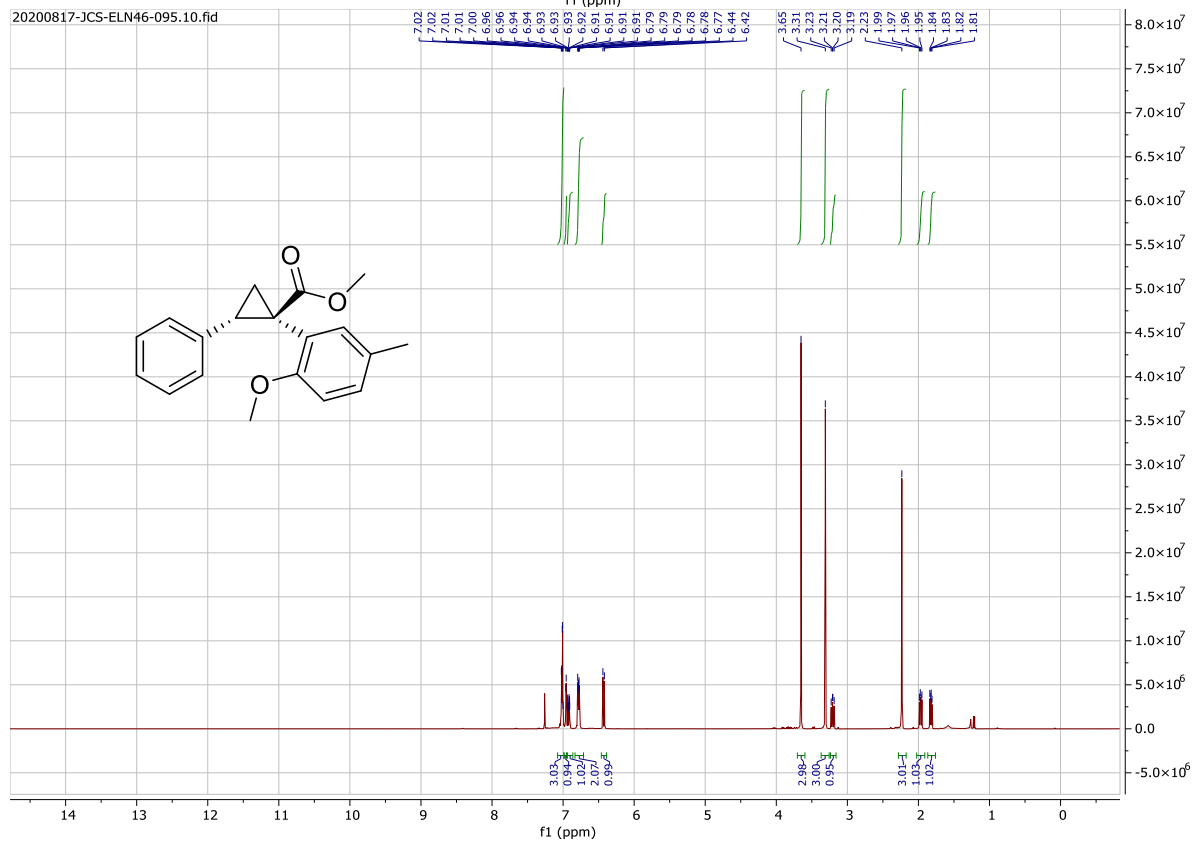

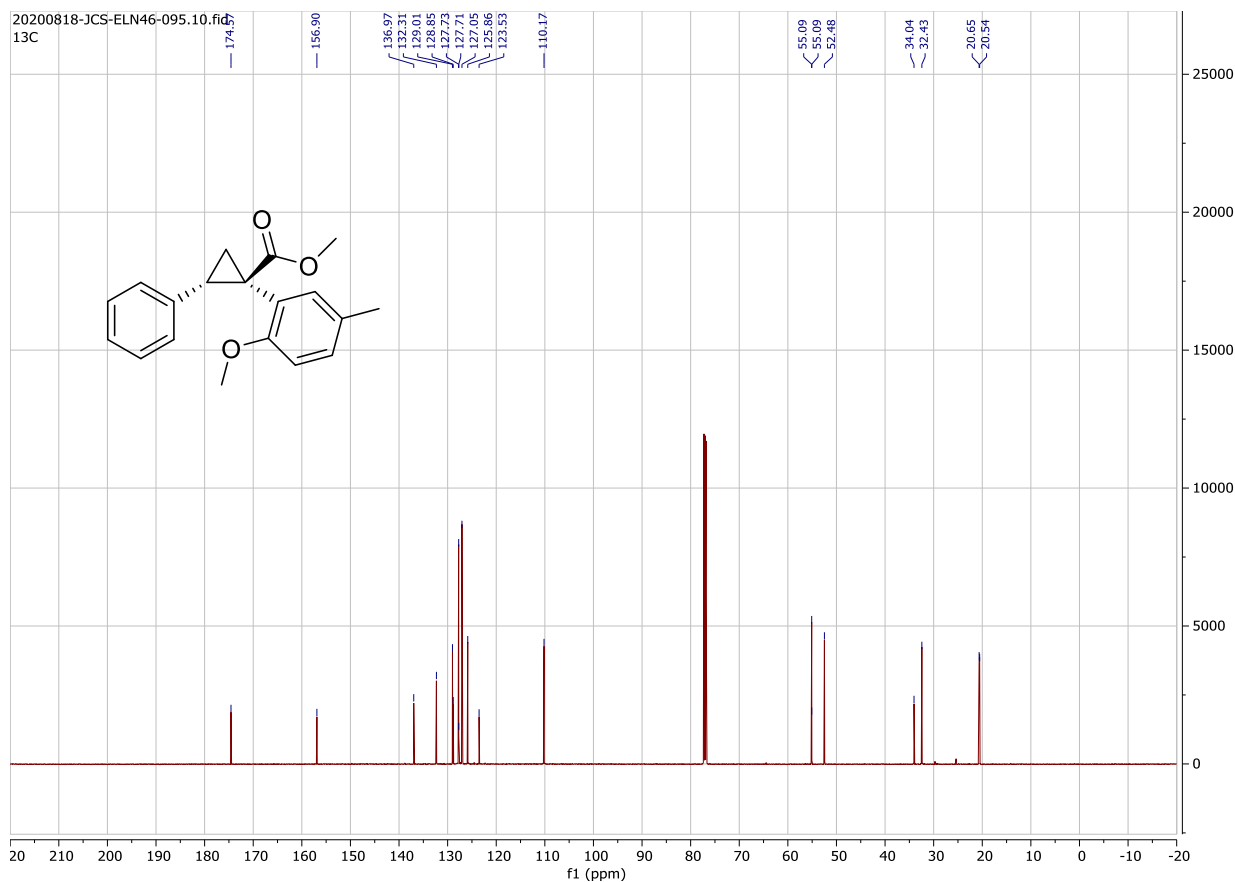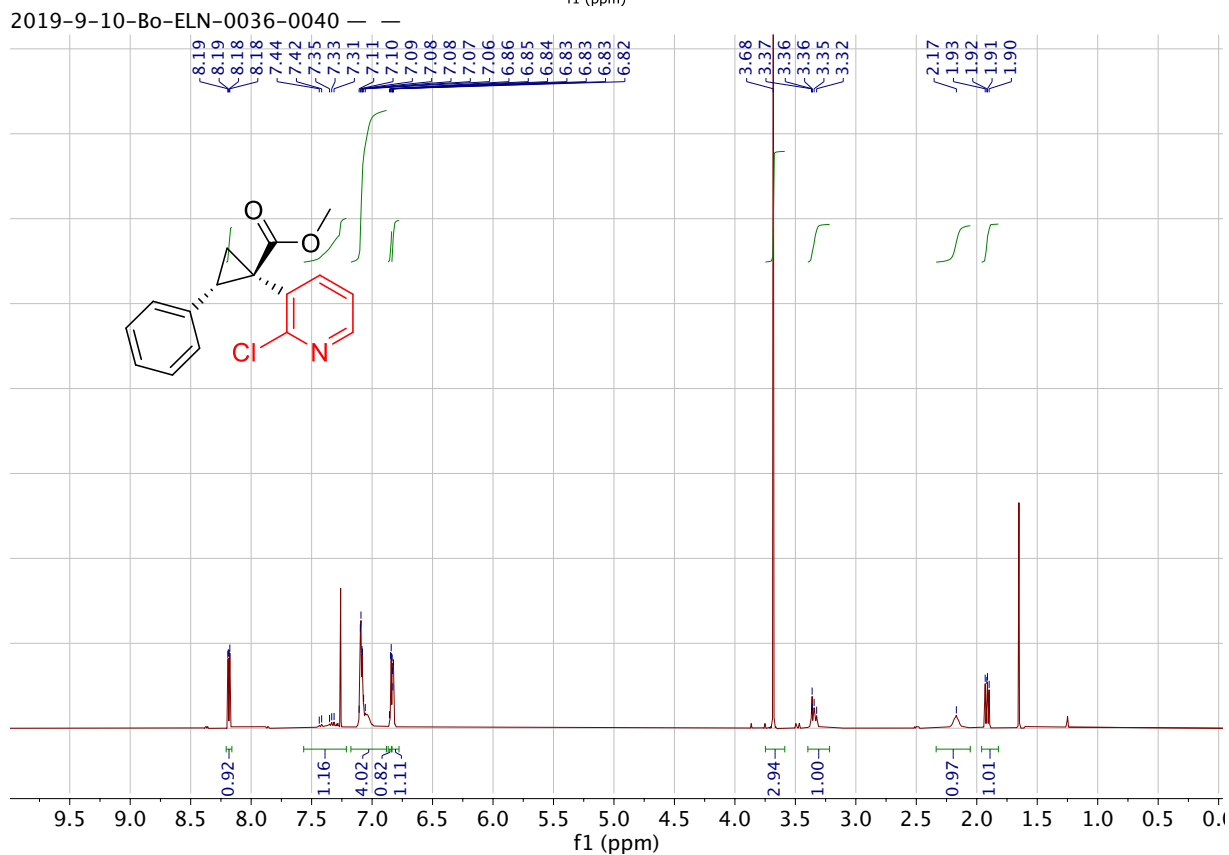

Bo-ELN-0036-0040.10.fid —

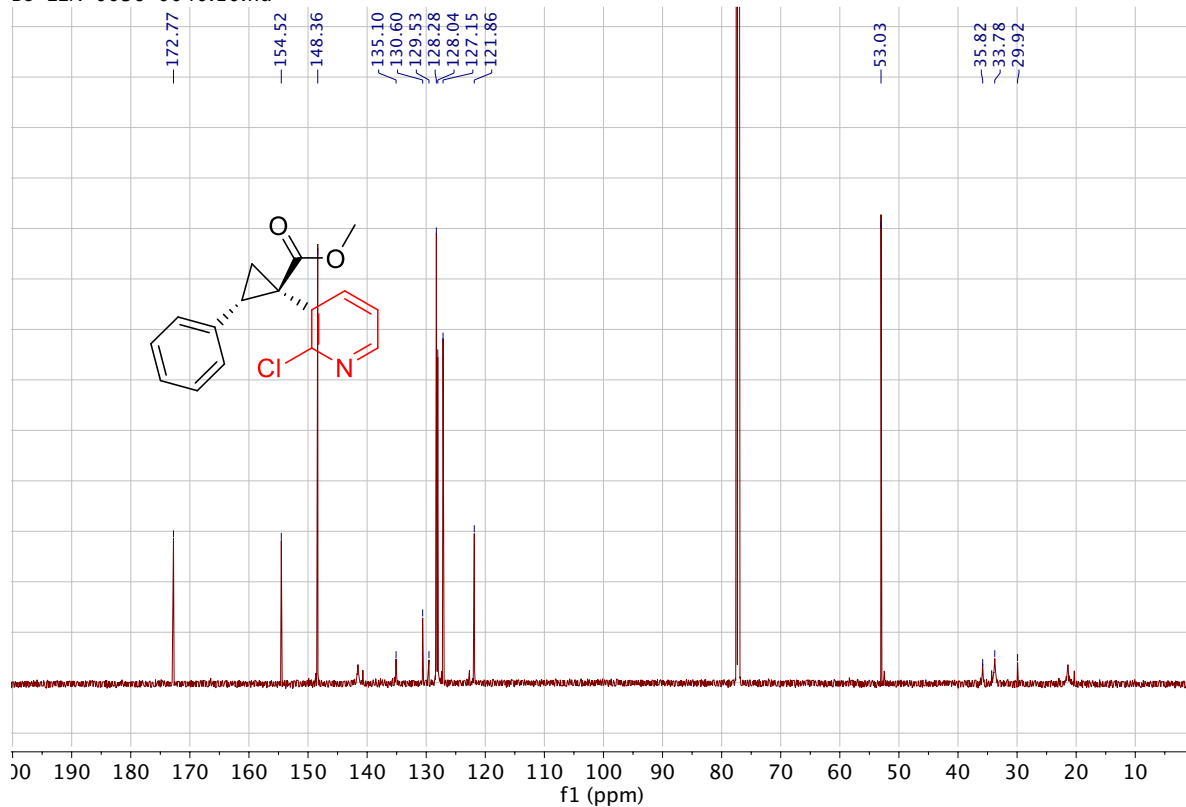

2019-10-15-Bo-ELN-36-64 — Xun-ELN-1-306-crude-VNMR400 —

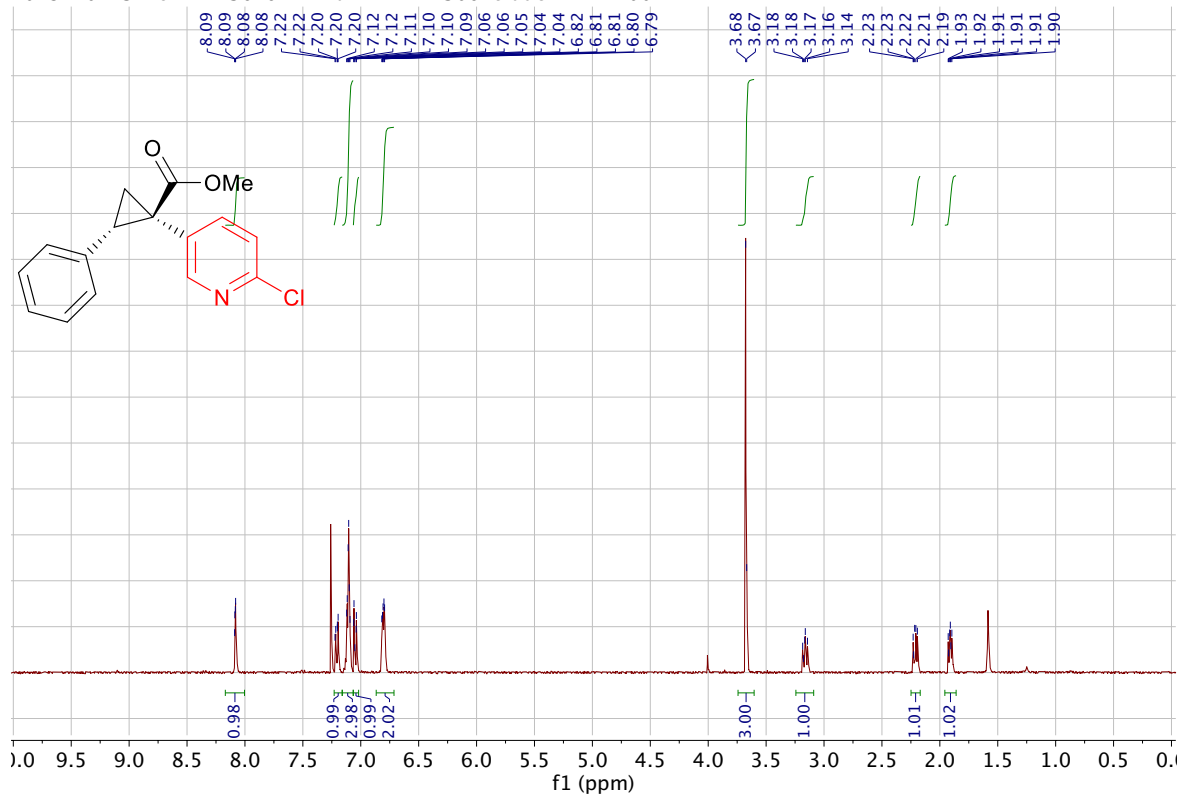

20200824-Bo-ELN36-63.10.fid — 13C

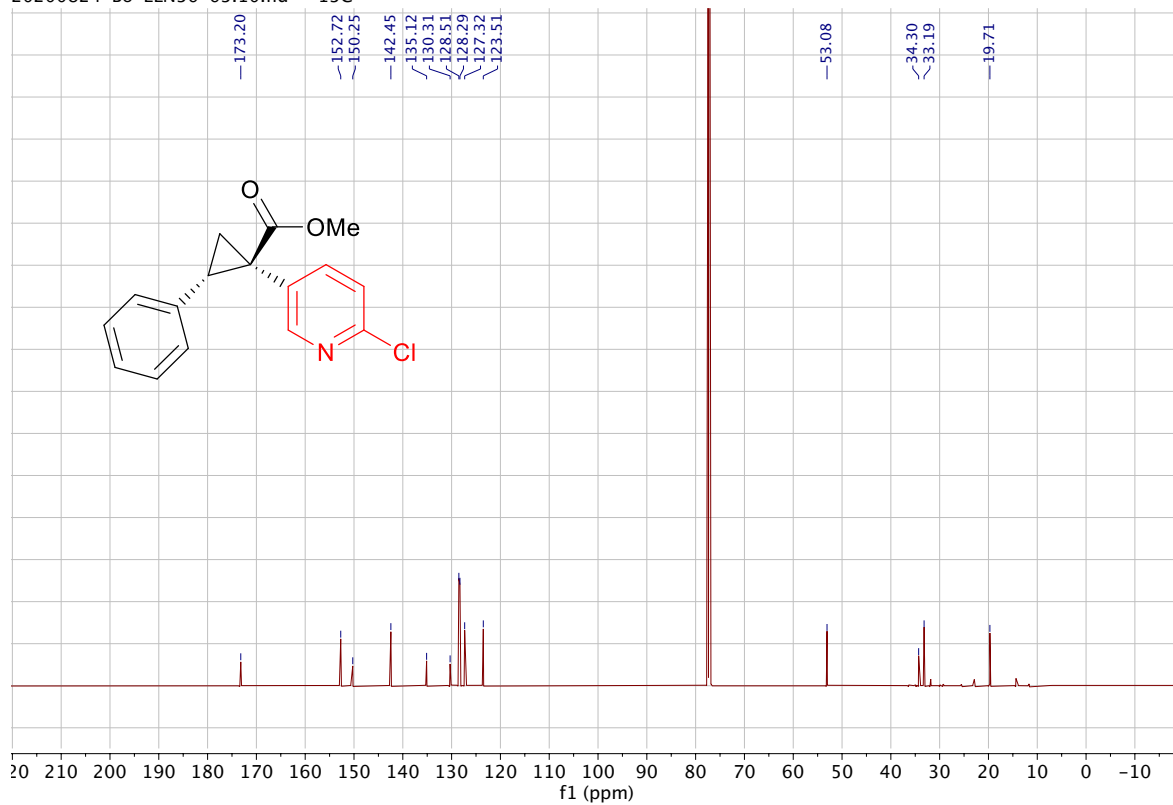

20200822-JCS-ELN46-239.10.fid

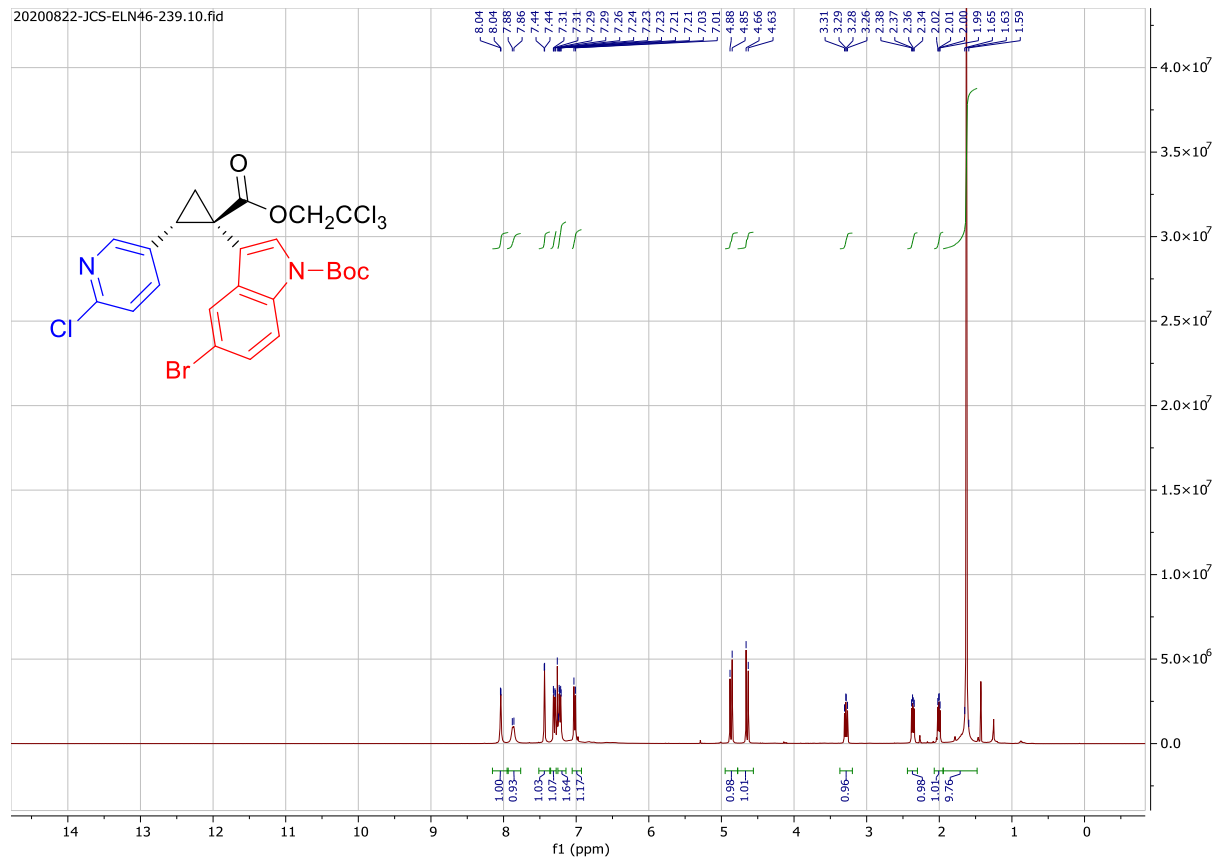

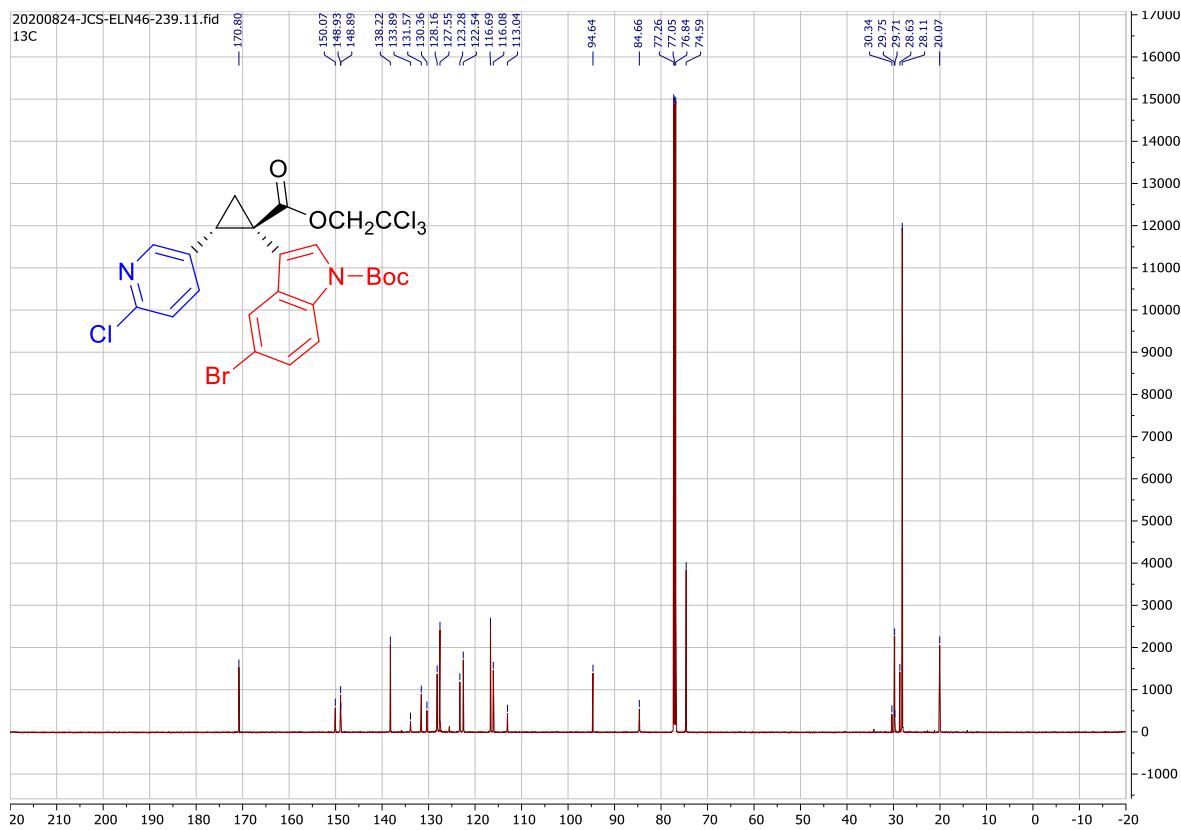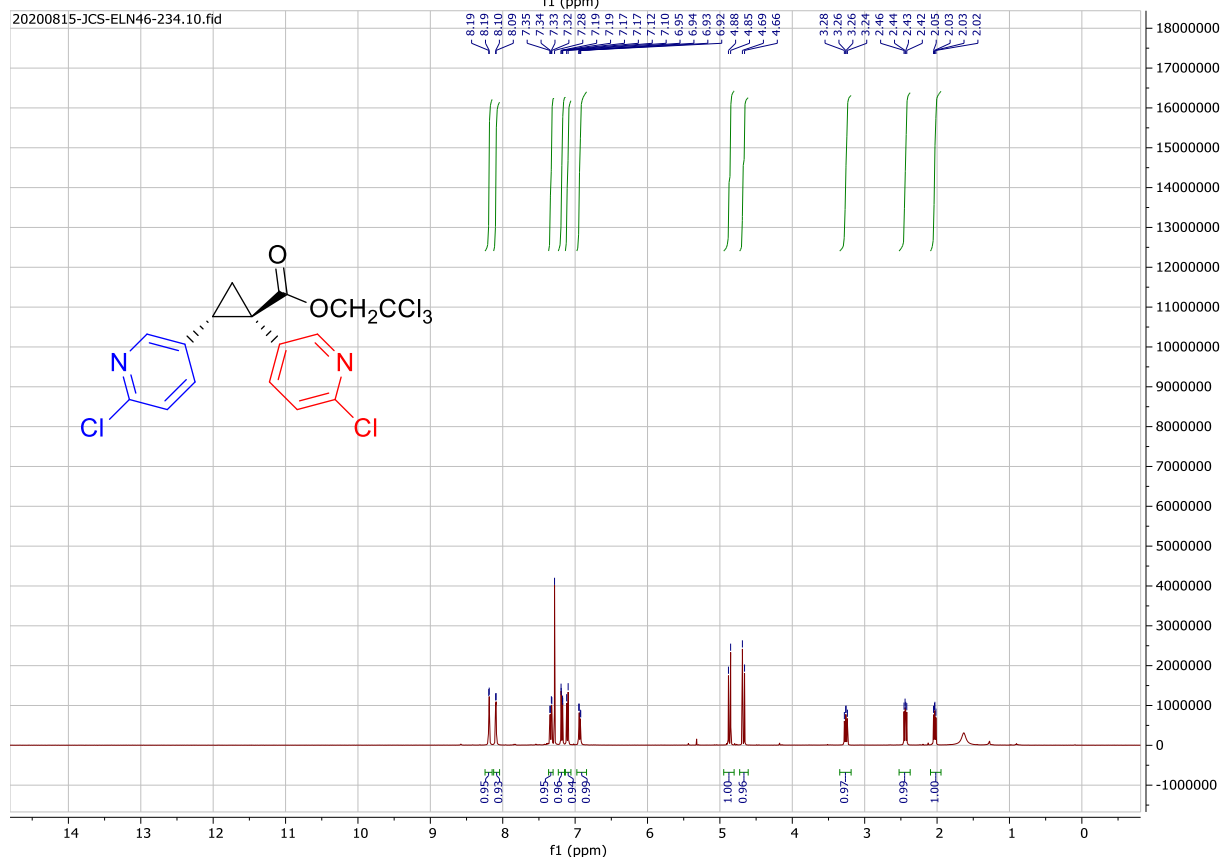

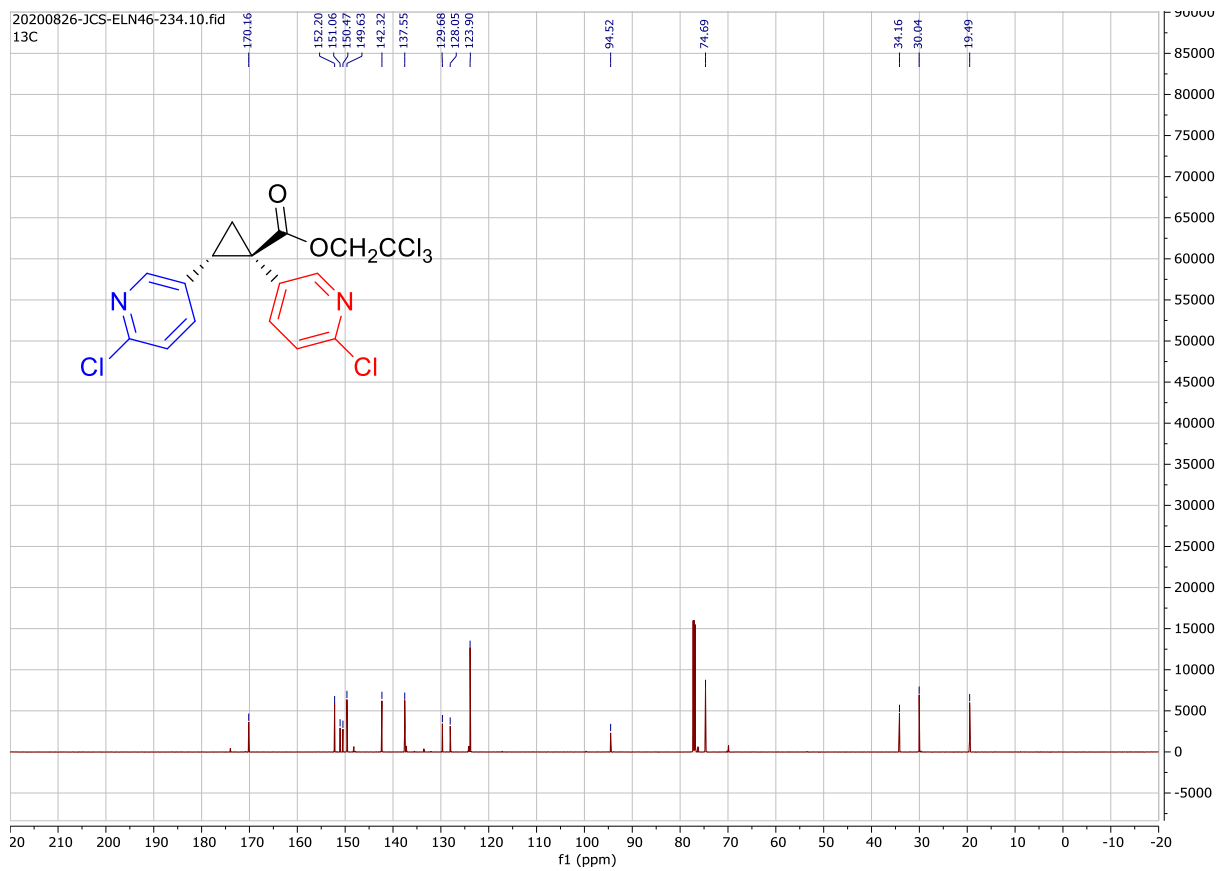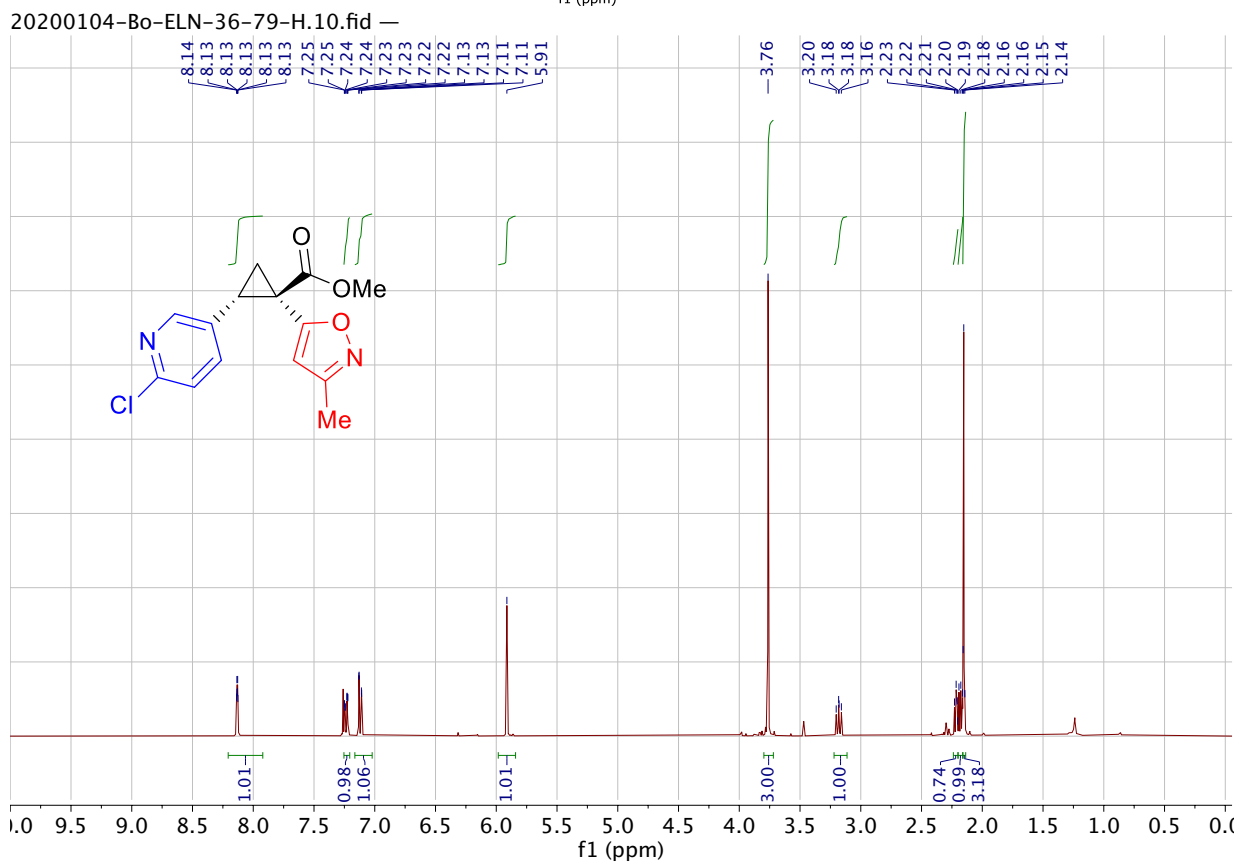

20200104-Bo-ELN-36-79-C.10.fid —

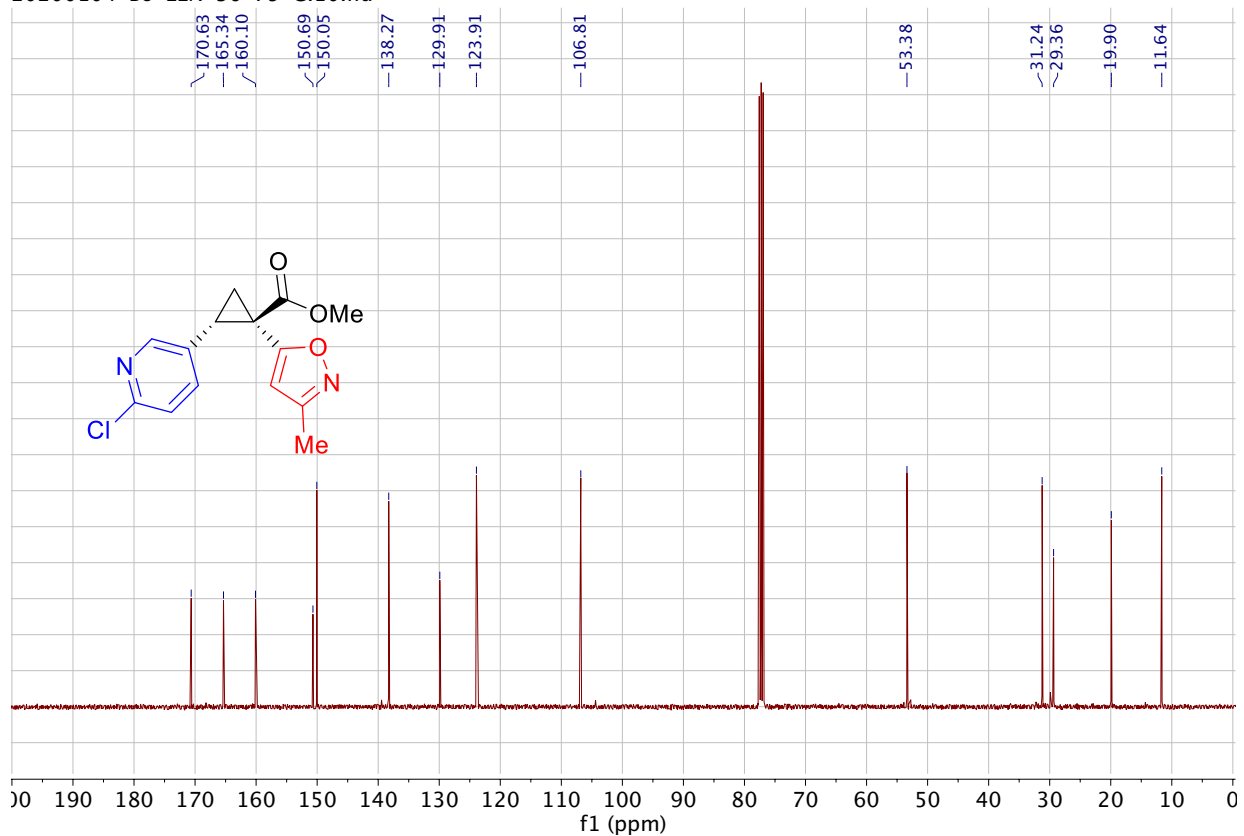

2019-9-14-Bo-ELN-0036-0051 — —

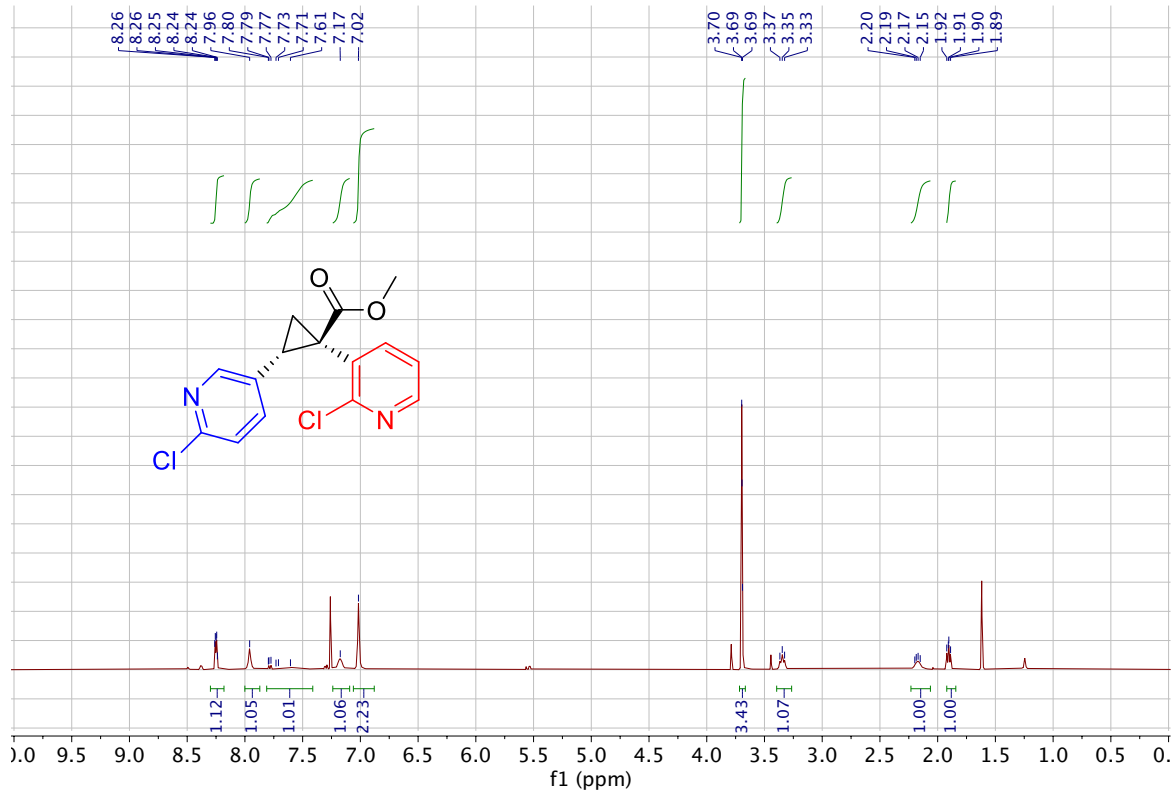

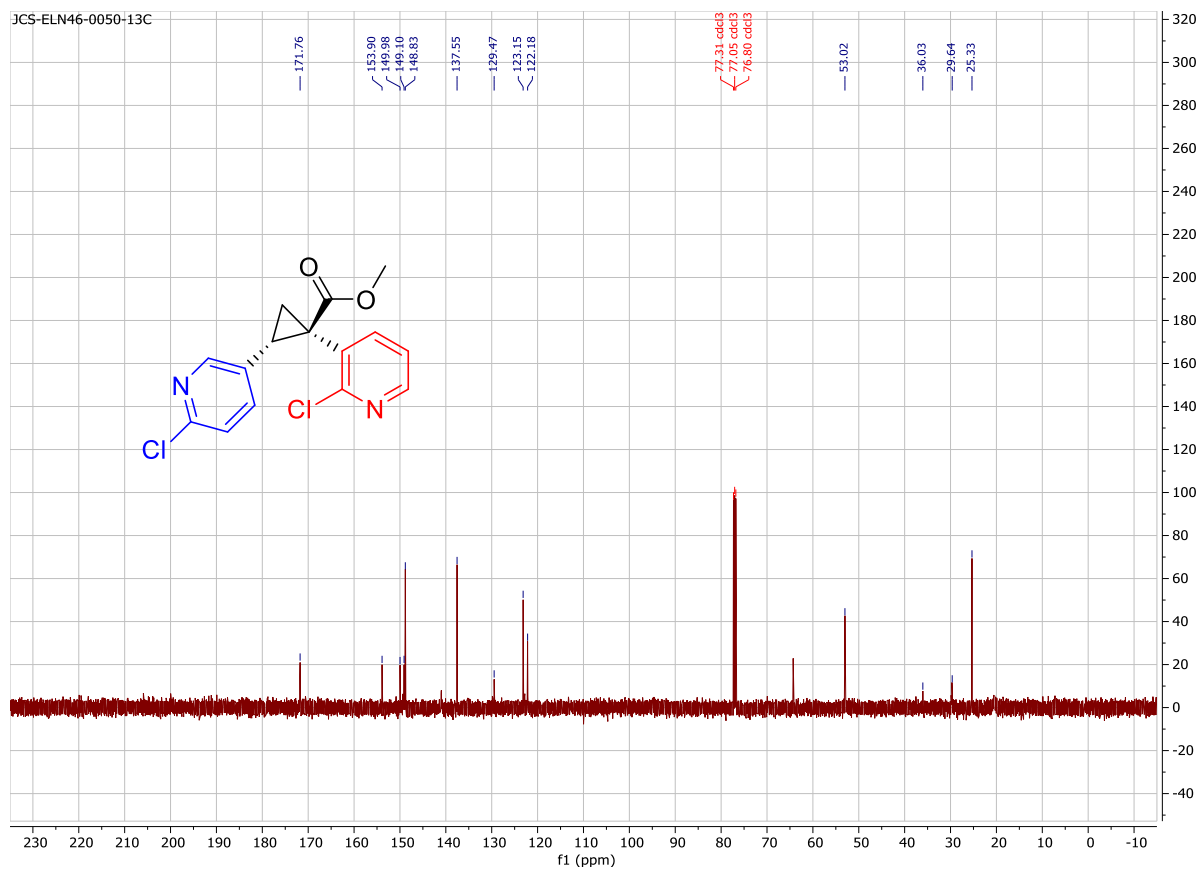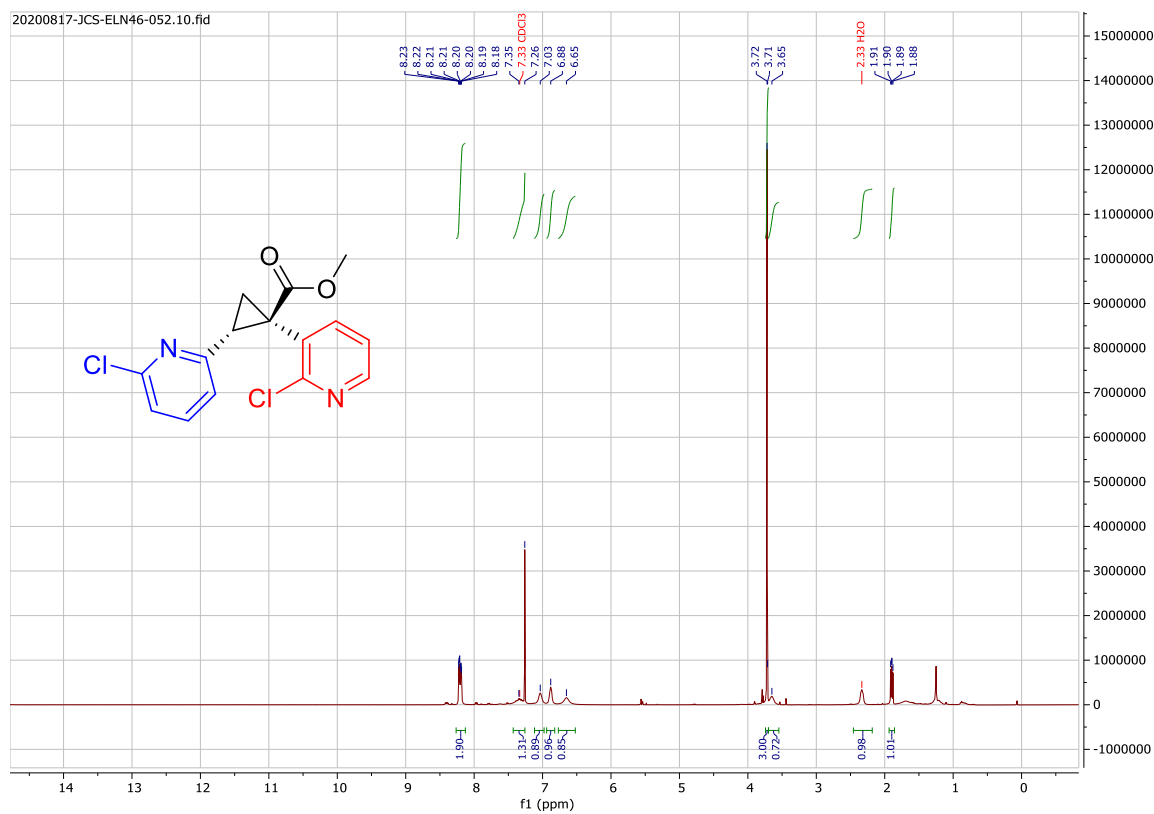

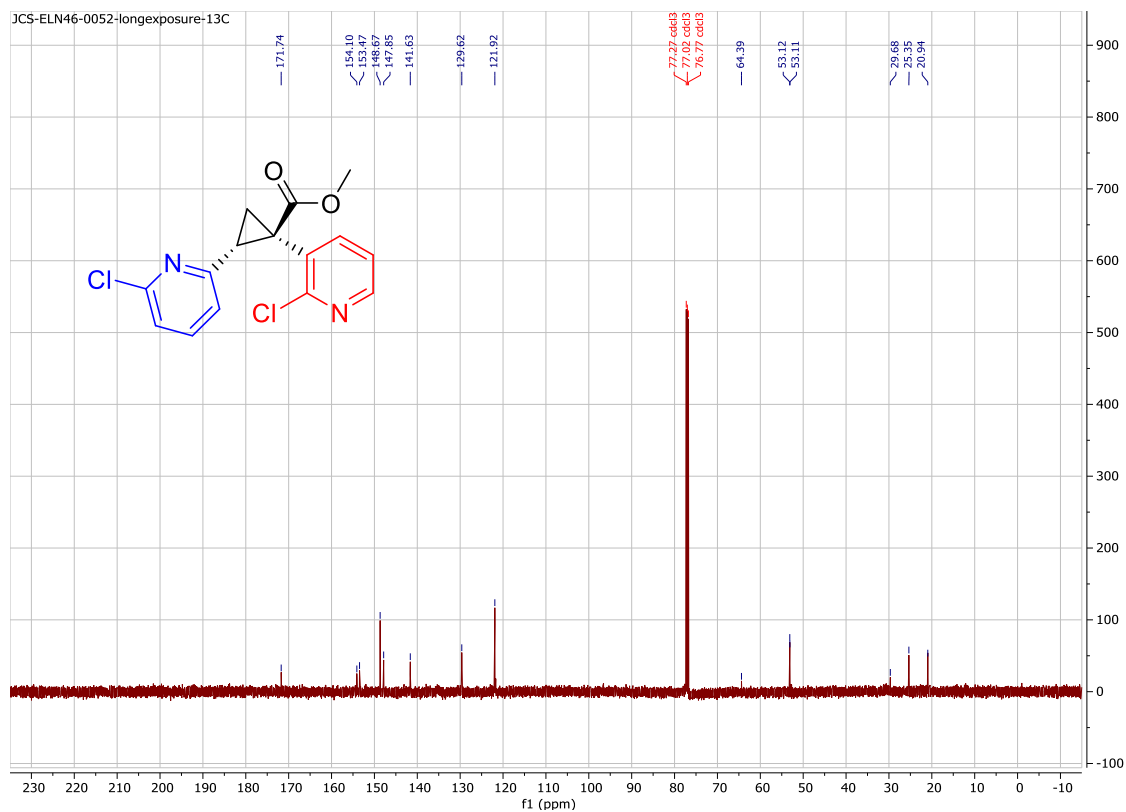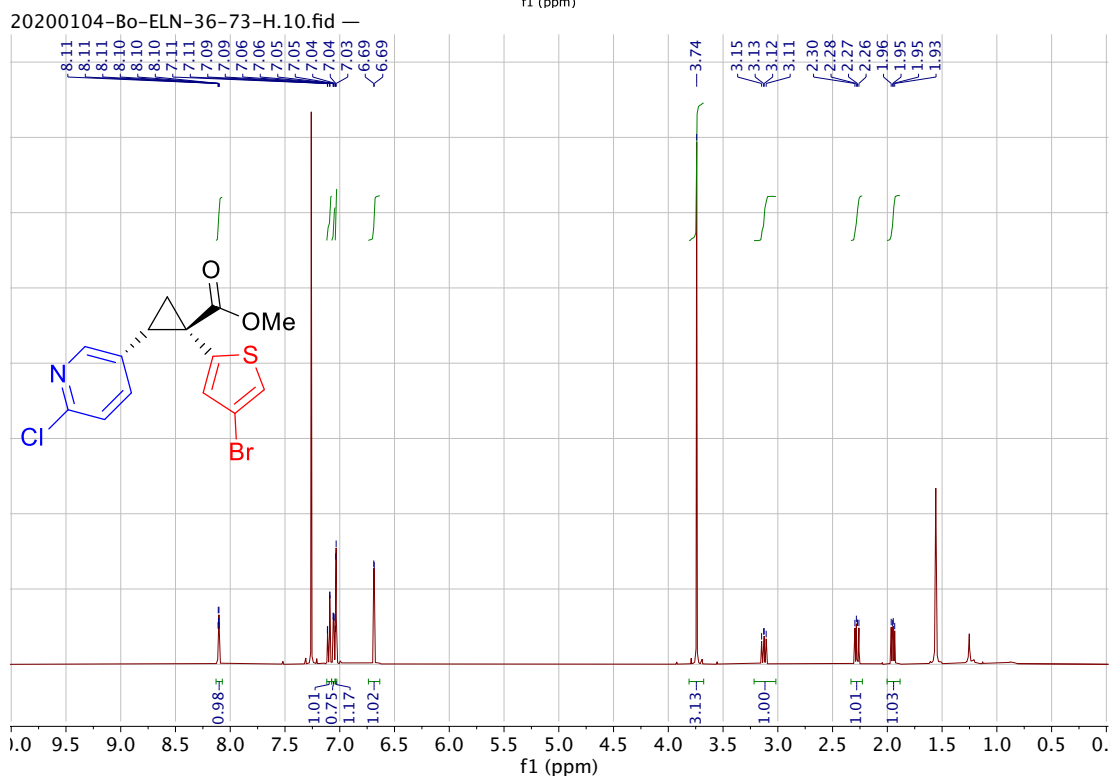

20200104-Bo-ELN-36-73-C.10.fid —

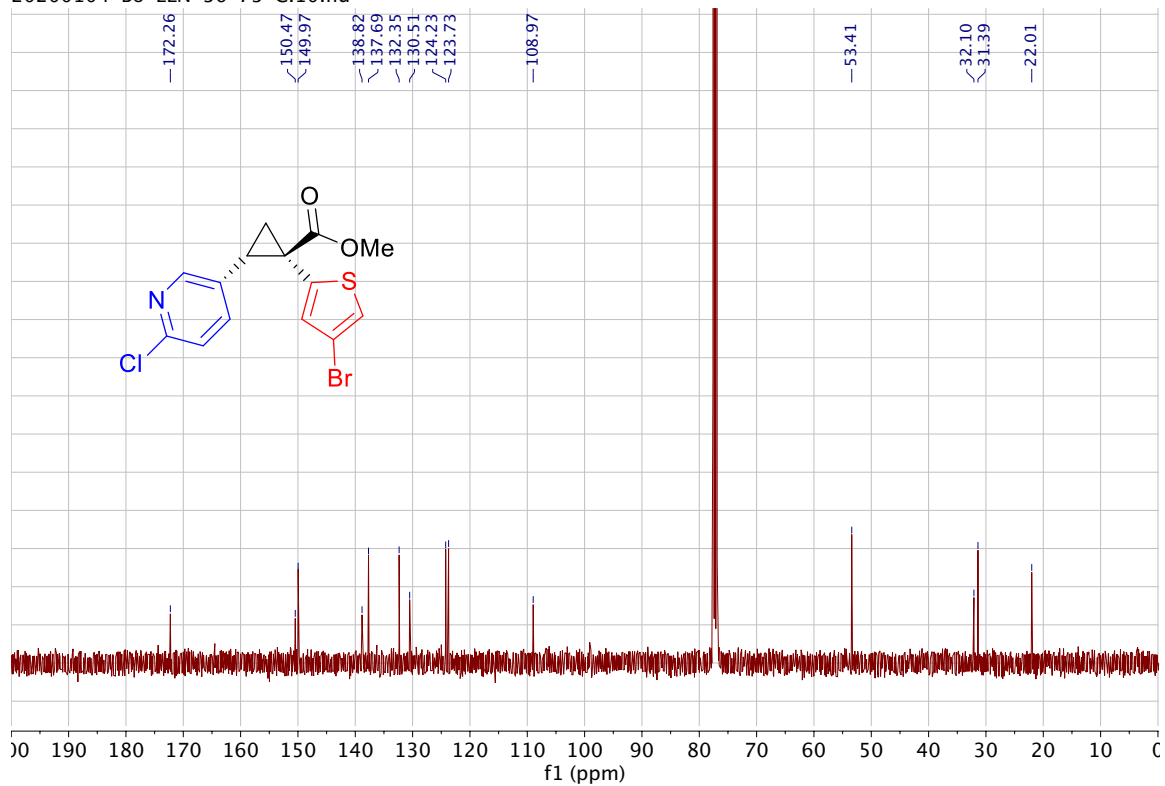

20200817-JCS-ELN46-051.10.fid

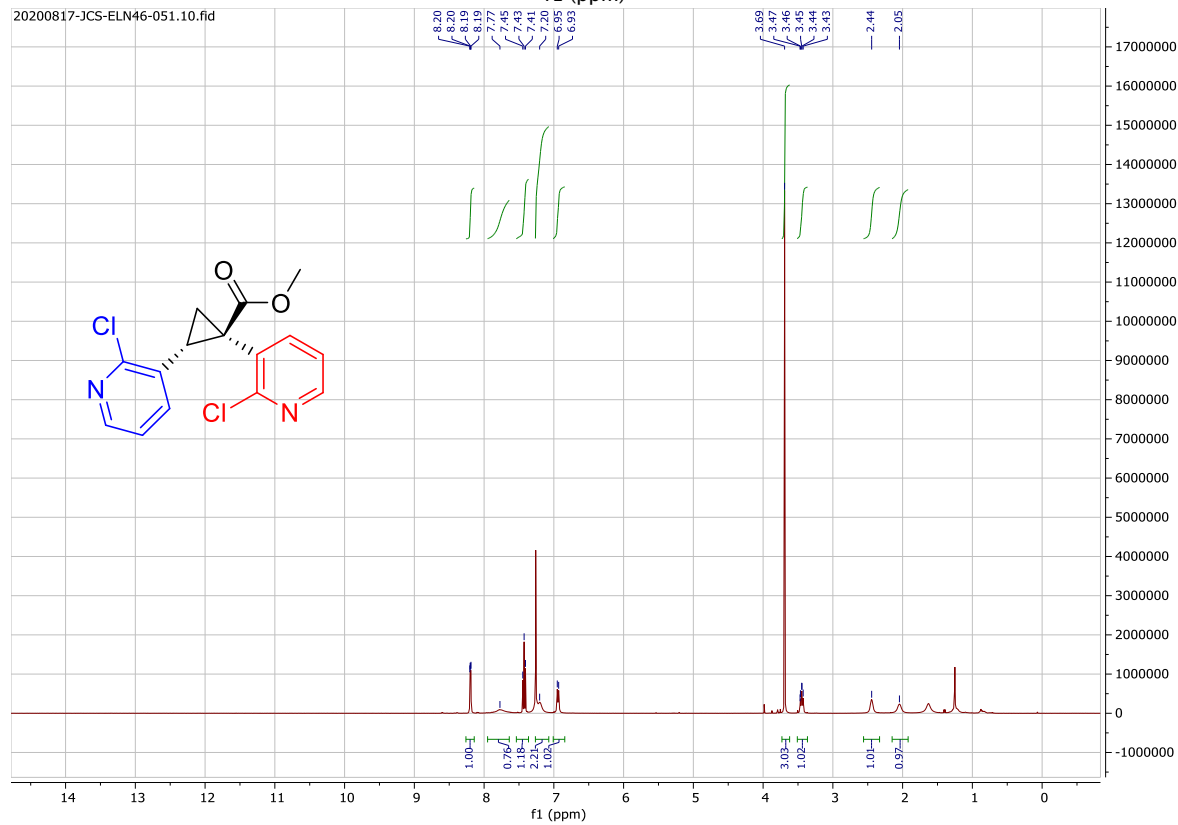

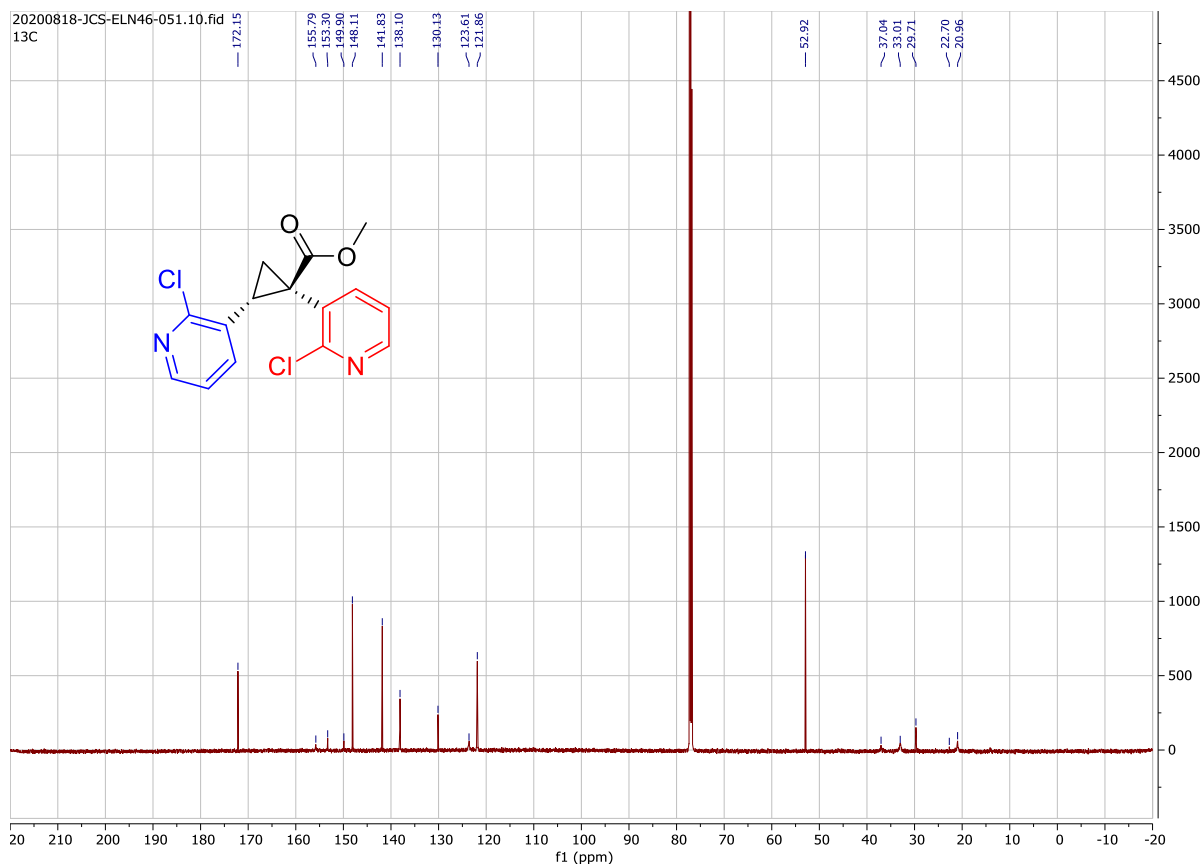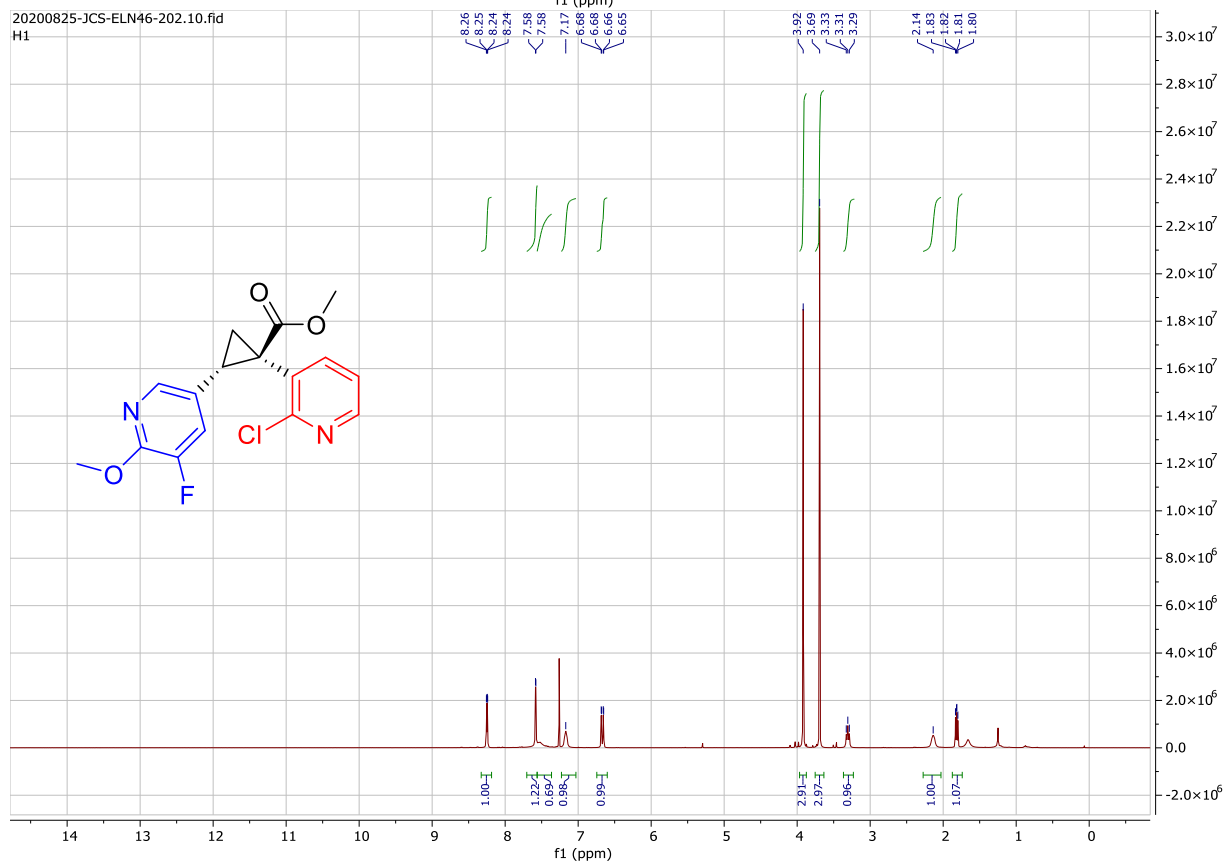

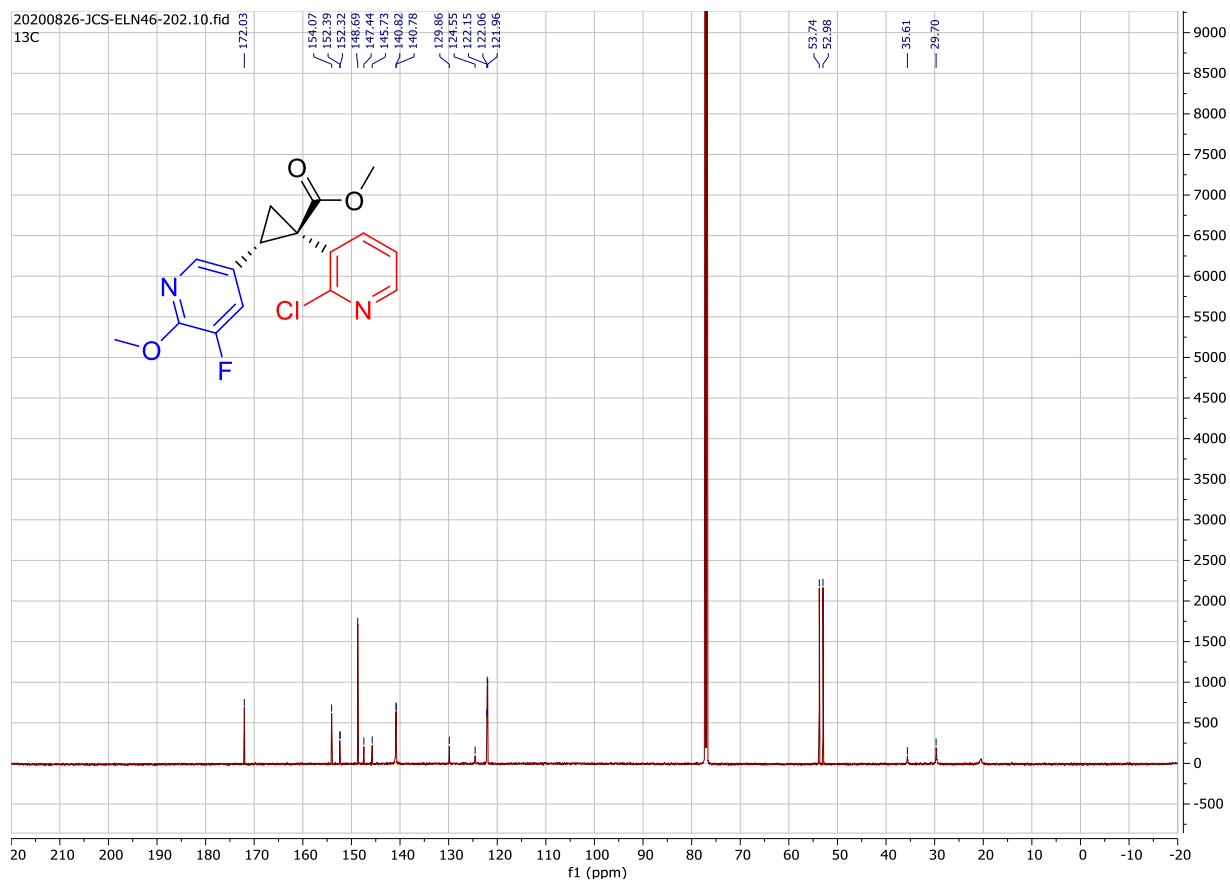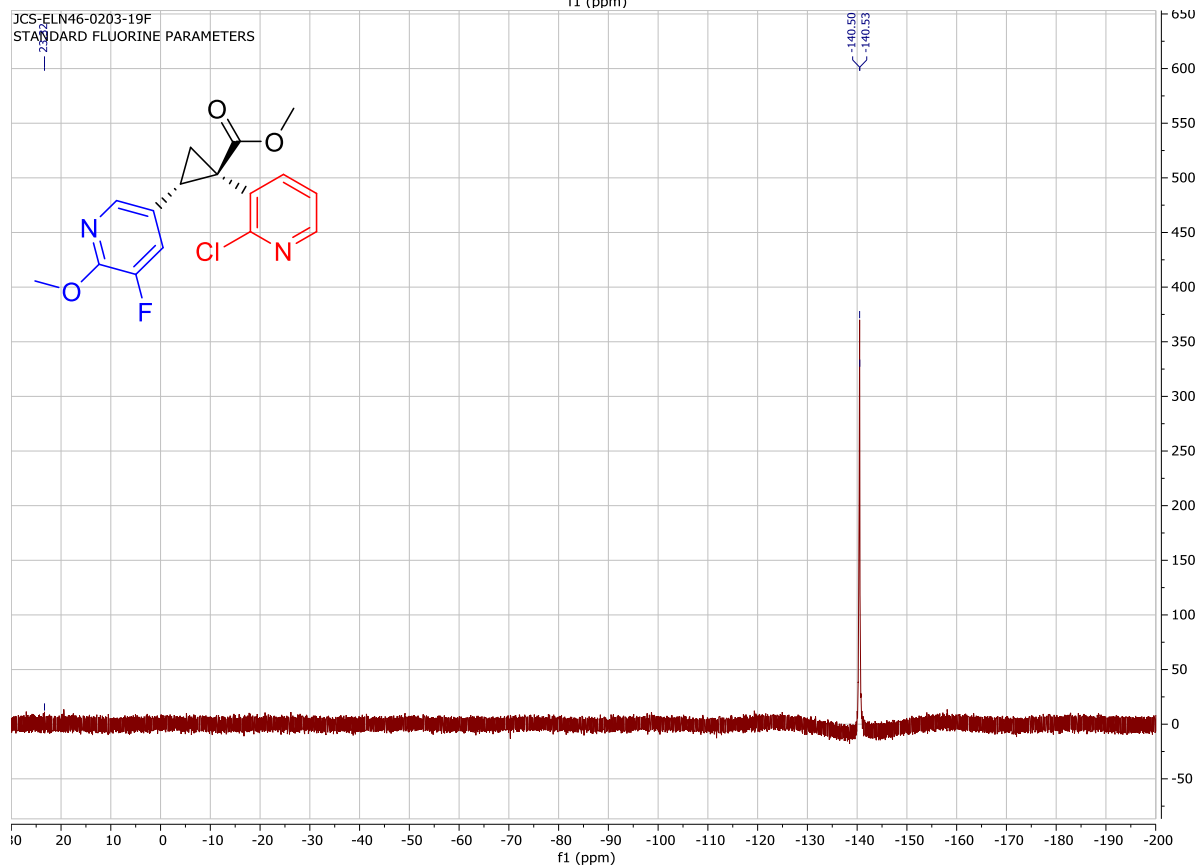

20200104-Bo-ELN-36-55-H.10.fid —

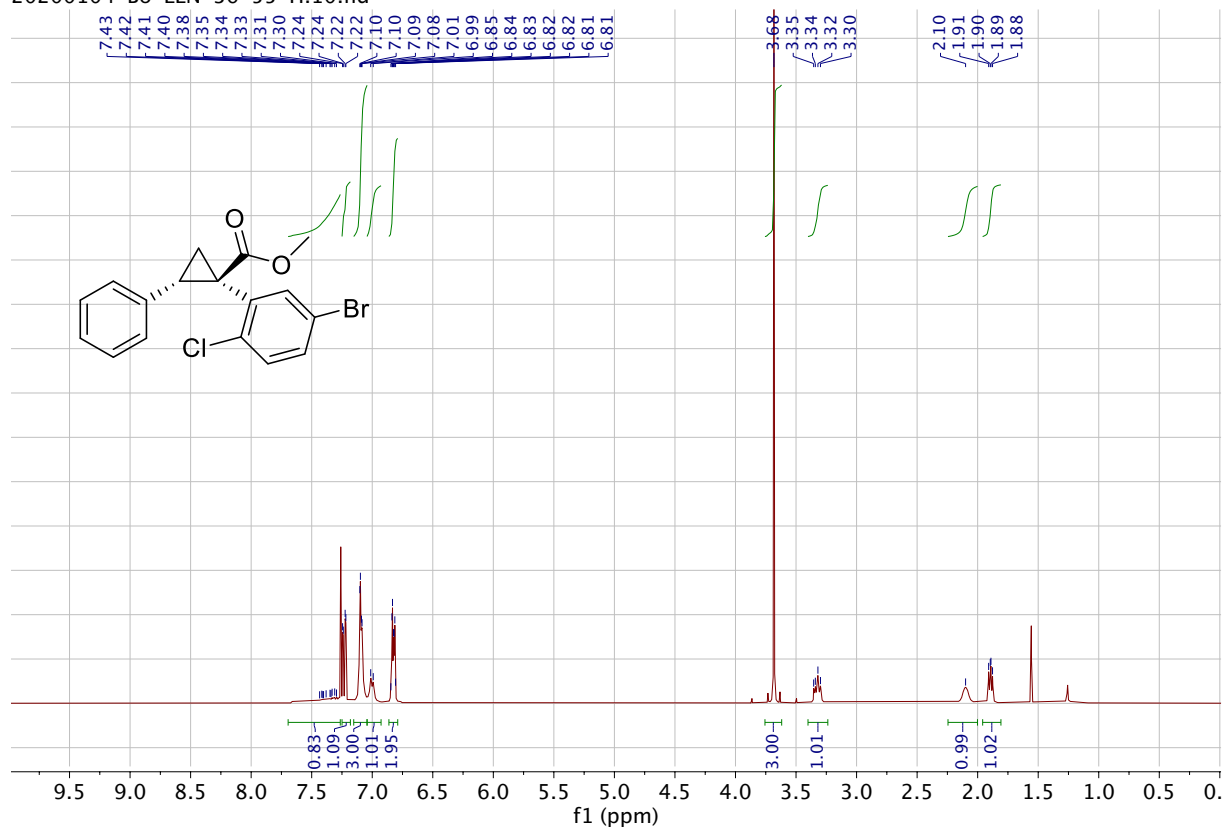

20200104-Bo-ELN-36-55-C.10.fid —

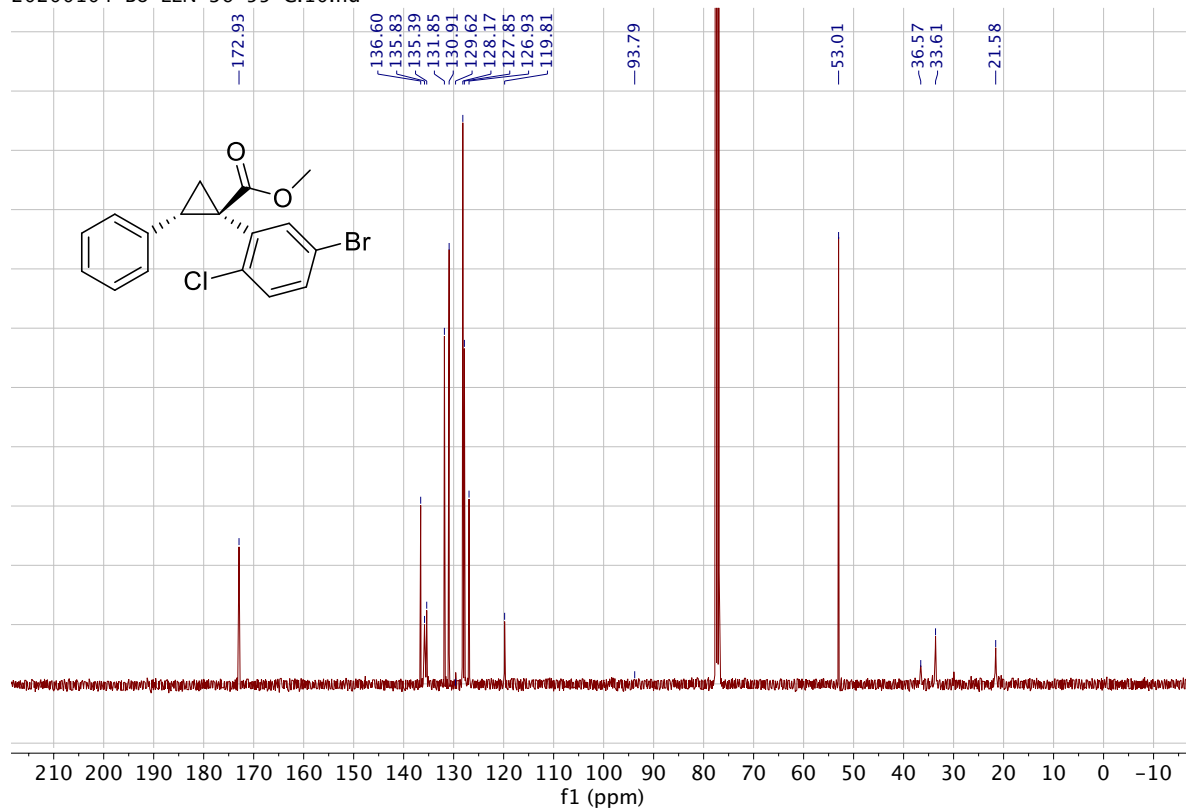

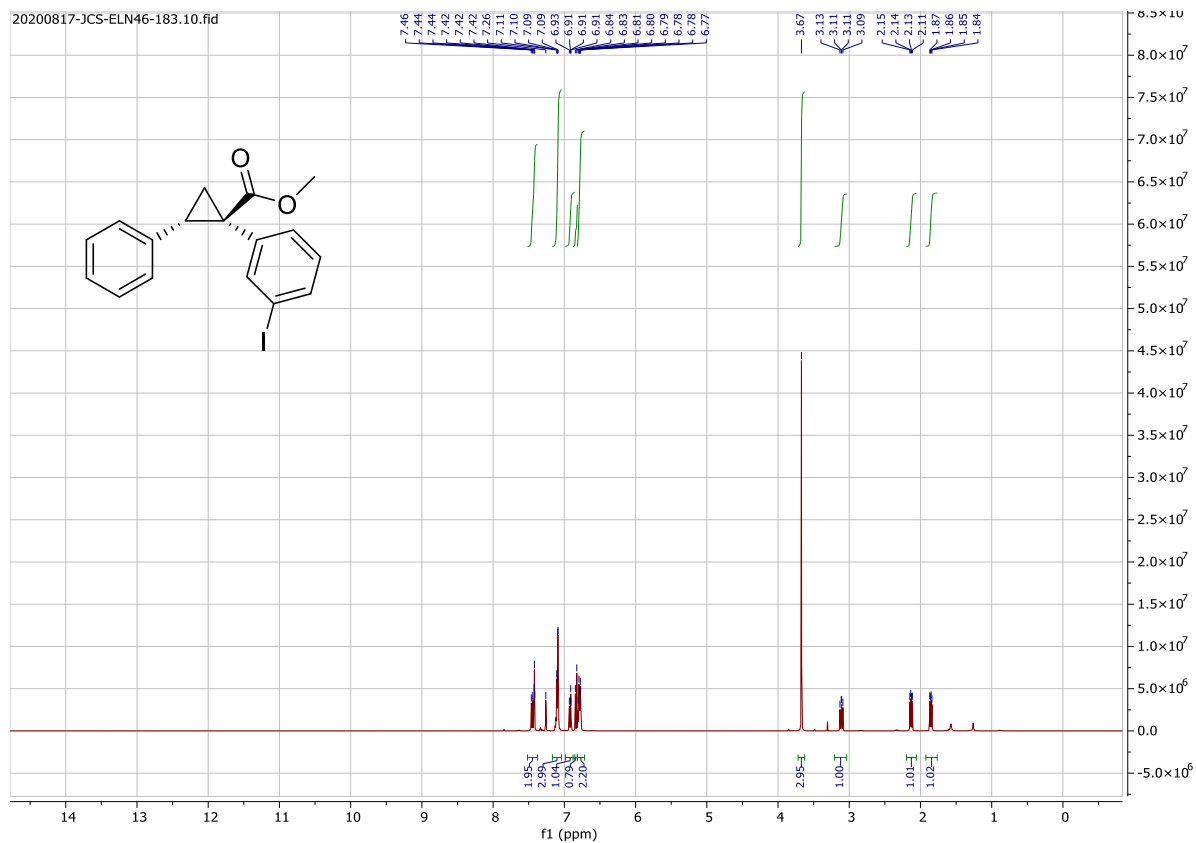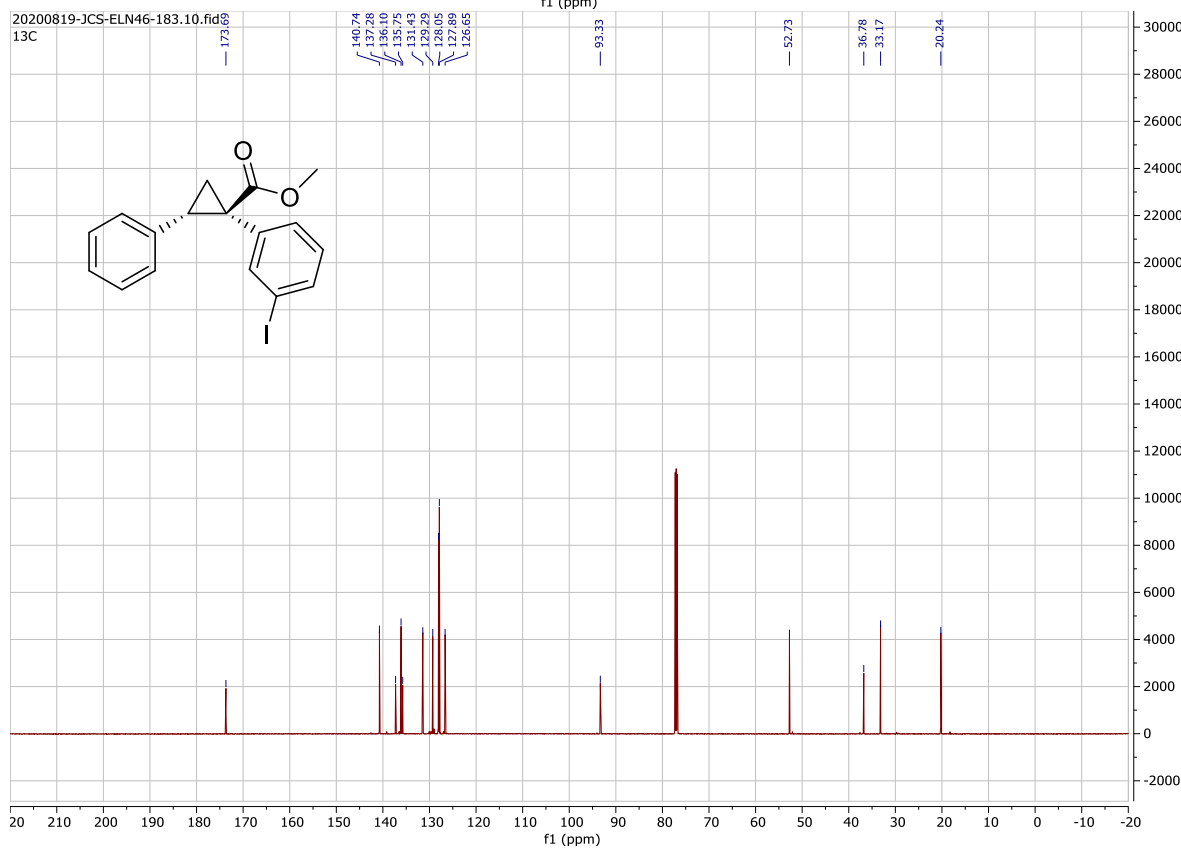

## 7. Crystallographic Data:

### 7.1: Rh<sub>2</sub>(R-TPPTTL)<sub>4</sub> cocrystalized with 2-Clpyridine from CH<sub>2</sub>Cl<sub>2</sub>

#### JCS-Pyridine-TPPTTL-CoXtal-xtal2

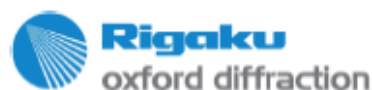

Submitted by: Jack Sharland  
Emory University

Solved by: John Bacsá

Sample ID: JCS-Pyridine-TPPTTL-CoXtal

**$R_1=4.83\%$**

#### Crystal Data and Experimental

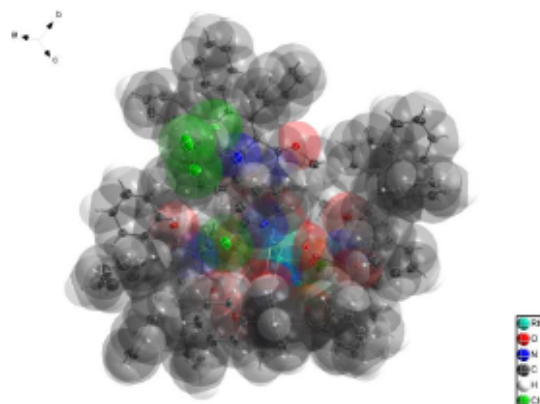

**Experimental.** Single red prism-shaped crystals of JCS-Pyridine-TPPTTL-CoXtal-xtal2 were The crystal was chosen from the sample as supplied.. A suitable crystal 0.55×0.41×0.15 mm<sup>3</sup> was selected and mounted on a loop with paratone oil on an XtaLAB Synergy, Dualflex, HyPix diffractometer. The crystal was kept at a steady  $T = 99.8(8)$  K during data collection. The structure was solved with the ShelXT n/a (Sheldrick, 2015) structure solution program using the Intrinsic Phasing solution method and by using Olex2 (Dolomanov et al., 2009) as the graphical interface. The model was refined with version 2018/3 of ShelXL 2018/3 (Sheldrick, 2015) using Least Squares minimisation.

**Crystal Data.** C<sub>168</sub>H<sub>134</sub>Cl<sub>5</sub>N<sub>7</sub>O<sub>16</sub>Rh<sub>2</sub>,  $M_r = 2889.88$ , orthorhombic,  $P2_12_12_1$  (No. 19),  $a = 20.07057(12)$  Å,  $b = 20.40295(11)$  Å,  $c = 41.1384(2)$  Å,  $\alpha = \beta = \gamma = 90^\circ$ ,  $V = 16846.11(16)$  Å<sup>3</sup>,  $T = 99.8(8)$  K,  $Z = 4$ ,  $Z' = 1$ ,  $\mu(\text{Cu K}\alpha) = 2.780$ , 123357 reflections measured, 34540 unique ( $R_{\text{int}} = 0.0491$ ) which were used in all calculations. The final  $wR_2$  was 0.1270 (all data) and  $R_1$  was 0.0483 ( $I > 2(I)$ ).

#### Compound JCS-Pyridine-TPPTTL-CoXtal-xtal2

|                                       |                                                                                                  |
|---------------------------------------|--------------------------------------------------------------------------------------------------|
| Formula                               | C <sub>168</sub> H <sub>134</sub> Cl <sub>5</sub> N <sub>7</sub> O <sub>16</sub> Rh <sub>2</sub> |
| $D_{\text{calc.}} / \text{g cm}^{-3}$ | 1.139                                                                                            |
| $\mu / \text{mm}^{-1}$                | 2.780                                                                                            |
| Formula Weight                        | 2889.88                                                                                          |
| Colour                                | red                                                                                              |
| Shape                                 | prism                                                                                            |
| Size/mm <sup>3</sup>                  | 0.55×0.41×0.15                                                                                   |
| $T/\text{K}$                          | 99.8(8)                                                                                          |
| Crystal System                        | orthorhombic                                                                                     |
| Flack Parameter                       | 0.055(3)                                                                                         |
| Hooft Parameter                       | 0.0273(15)                                                                                       |
| Space Group                           | $P2_12_12_1$                                                                                     |
| $a/\text{\AA}$                        | 20.07057(12)                                                                                     |
| $b/\text{\AA}$                        | 20.40295(11)                                                                                     |
| $c/\text{\AA}$                        | 41.1384(2)                                                                                       |
| $\alpha/^\circ$                       | 90                                                                                               |
| $\beta/^\circ$                        | 90                                                                                               |
| $\gamma/^\circ$                       | 90                                                                                               |
| $V/\text{\AA}^3$                      | 16846.11(16)                                                                                     |
| $Z$                                   | 4                                                                                                |
| $Z'$                                  | 1                                                                                                |
| Wavelength/Å                          | 1.54184                                                                                          |
| Radiation type                        | Cu K $\alpha$                                                                                    |
| $\theta_{\text{min}}/^\circ$          | 2.449                                                                                            |
| $\theta_{\text{max}}/^\circ$          | 77.155                                                                                           |
| Measured Refl.                        | 123357                                                                                           |
| Independent Refl.                     | 34540                                                                                            |
| Reflections with $I > 2(I)$           | 33360                                                                                            |
| $R_{\text{int}}$                      | 0.0491                                                                                           |
| Parameters                            | 1847                                                                                             |
| Restraints                            | 2461                                                                                             |
| Largest Peak                          | 1.126                                                                                            |
| Deepest Hole                          | -1.091                                                                                           |
| GooF                                  | 1.028                                                                                            |
| $wR_2$ (all data)                     | 0.1270                                                                                           |
| $wR_2$                                | 0.1244                                                                                           |
| $R_1$ (all data)                      | 0.0503                                                                                           |
| $R_1$                                 | 0.0483                                                                                           |

## Structure Quality Indicators

|              |            |       |          |      |                  |       |                                                     |       |       |          |
|--------------|------------|-------|----------|------|------------------|-------|-----------------------------------------------------|-------|-------|----------|
| Reflections: | d min (Cu) | 0.79  | 1/σ      | 23.4 | R <sub>int</sub> | 4.91% | R <sub>exp</sub> /R <sub>sig</sub> /R <sub>Cr</sub> | 100%  |       |          |
| Refinement:  | Shift      | 0.007 | Max Peak | 1.1  | Min Peak         | -1.1  | Goof                                                | 1.028 | Flack | 0.055(3) |

**Experimental Extended.** A red prism-shaped crystal with dimensions  $0.55 \times 0.41 \times 0.15$  mm<sup>3</sup> was mounted on a loop with paratone oil. Data were collected using an XtaLAB Synergy, Dualflex, HyPix diffractometer operating at  $T = 99.8(8)$  K.

Data were measured using  $\omega$  scans of  $0.5^\circ$  per frame for 5.0/1.0 s using Cu K $\alpha$  radiation. The total number of runs and images was based on the strategy calculation from the program CrysAlisPro (Rigaku, V1.171.40.53, 2019) The maximum resolution that was achieved was  $\Theta = 77.155^\circ$  (0.79 Å).

The diffraction pattern was indexed The total number of runs and images was based on the strategy calculation from the program CrysAlisPro (Rigaku, V1.171.40.53, 2019) and the unit cell was refined using CrysAlisPro (Rigaku, V1.171.40.53, 2019) on 80615 reflections, 65% of the observed reflections.

Data reduction, scaling and absorption corrections were performed using CrysAlisPro (Rigaku, V1.171.40.53, 2019). The final completeness is 99.90 % out to  $77.155^\circ$  in  $\Theta$ . A gaussian absorption correction was performed using CrysAlisPro 1.171.40.53 (Rigaku Oxford Diffraction, 2019) Numerical absorption correction based on gaussian integration over a multifaceted crystal model Empirical absorption correction using spherical harmonics, implemented in SCALE3 ABSPACK scaling algorithm.. The absorption coefficient  $\mu$  of this material is 2.780 mm<sup>-1</sup> at this wavelength ( $\lambda = 1.542\text{\AA}$ ) and the minimum and maximum transmissions are 0.198 and 1.000.

The structure was solved and the space group  $P2_12_12_1$  (# 19) determined by the ShelXT n/a (Sheldrick, 2015) structure solution program using Intrinsic Phasing and refined by Least Squares using version 2018/3 of ShelXL 2018/3 (Sheldrick, 2015). All non-hydrogen atoms were refined anisotropically. Hydrogen atom positions were calculated geometrically and refined using the riding model. Hydrogen atom positions were calculated geometrically and refined using the riding model.

*\_exptl\_absorpt\_process\_details:* CrysAlisPro 1.171.40.53 (Rigaku Oxford Diffraction, 2019) Numerical absorption correction based on gaussian integration over a multifaceted crystal model Empirical absorption correction using spherical harmonics, implemented in SCALE3 ABSPACK scaling algorithm.

There is a single molecule in the asymmetric unit, which is represented by the reported sum formula. In other words:  $Z$  is 4 and  $Z'$  is 1.

The Flack parameter was refined to 0.055(3). Determination of absolute structure using Bayesian statistics on Bijvoet differences using the Olex2 results in 0.0273(15). Note: The Flack parameter is used to determine chirality of the crystal studied, the value should be near 0, a value of 1 means that the stereochemistry is wrong and the model should be inverted. A value of 0.5 means that the crystal consists of a racemic mixture of the two enantiomers.

**Table 1:** Fractional Atomic Coordinates ( $\times 10^4$ ) and Equivalent Isotropic Displacement Parameters ( $\text{\AA}^2 \times 10^3$ ) for JCS-Pyridine-TPPTL-CoXtal-xtal2.  $U_{\text{eq}}$  is defined as 1/3 of the trace of the orthogonalised  $U_{ij}$ .

| Atom | x          | y          | z         | $U_{\text{eq}}$ |
|------|------------|------------|-----------|-----------------|
| Rh1  | 7401.0(2)  | 5645.8(2)  | 7026.8(2) | 18.67(8)        |
| Rh2  | 6867.1(2)  | 5474.7(2)  | 6511.8(2) | 17.97(8)        |
| O1_1 | 8262.6(15) | 5247.3(16) | 6841.6(6) | 20.8(7)         |
| O2_1 | 7748.3(15) | 5070.5(16) | 6360.8(7) | 23.5(7)         |

| Atom  | x          | y          | z          | Ueq      |
|-------|------------|------------|------------|----------|
| O3_1  | 9064(2)    | 4279.7(17) | 5752.0(8)  | 33.2(9)  |
| O4_1  | 8140(2)    | 3654.2(17) | 6718.2(8)  | 39.5(10) |
| N1_1  | 8699.8(19) | 4095.8(14) | 6277.0(7)  | 26.0(9)  |
| C1_1  | 8240.9(17) | 5047(2)    | 6554.8(8)  | 23.9(9)  |
| C2_1  | 8866.7(16) | 4738.4(16) | 6404.6(9)  | 28.5(10) |
| C3_1  | 8788(2)    | 3929.8(17) | 5949.9(8)  | 27.1(10) |
| C4_1  | 8510(3)    | 3260.0(17) | 5907.4(8)  | 31.3(11) |
| C5_1  | 8301(3)    | 3040.4(16) | 6211.7(9)  | 31.8(11) |
| C6_1  | 8356(3)    | 3604.4(18) | 6444.4(9)  | 32.5(12) |
| C7_1  | 8096(3)    | 2397.0(17) | 6265.1(8)  | 39.5(13) |
| C8_1  | 8065(3)    | 1987.1(16) | 5986.9(8)  | 36.2(12) |
| C9_1  | 8250(3)    | 2211.9(19) | 5676.6(9)  | 45.0(15) |
| C10_1 | 8474(3)    | 2868.8(17) | 5631.4(8)  | 35.7(12) |
| C11_1 | 8678(2)    | 3110(2)    | 5303.8(9)  | 33.8(12) |
| C12_1 | 9157(3)    | 2797(2)    | 5123.3(11) | 36.8(13) |
| C13_1 | 9333(3)    | 3034(3)    | 4818.3(13) | 48.2(16) |
| C14_1 | 9024(4)    | 3571(3)    | 4690.4(12) | 52.3(17) |
| C15_1 | 8536(3)    | 3880(3)    | 4861.8(12) | 47.1(16) |
| C16_1 | 8355(3)    | 3662(2)    | 5171.7(11) | 38.2(13) |
| C17_1 | 8158(3)    | 1779(2)    | 5385.5(12) | 63.5(18) |
| C18_1 | 7675(4)    | 1914(4)    | 5154.1(18) | 83(2)    |
| C19_1 | 7580(6)    | 1492(5)    | 4887(2)    | 105(3)   |
| C20_1 | 7980(6)    | 961(5)     | 4853(2)    | 112(3)   |
| C21_1 | 8481(5)    | 831(4)     | 5072(2)    | 92(3)    |
| C22_1 | 8556(4)    | 1224(4)    | 5345.8(18) | 77(2)    |
| C23_1 | 7875(2)    | 1285.2(17) | 6027.9(11) | 33.6(12) |
| C24_1 | 8279(2)    | 849.6(19)  | 6198.0(14) | 37.7(13) |
| C25_1 | 8109(3)    | 195(2)     | 6222.7(15) | 45.1(14) |
| C26_1 | 7548(3)    | -37(2)     | 6078.1(15) | 40.4(13) |
| C27_1 | 7135(3)    | 384(2)     | 5911.7(14) | 40.4(13) |
| C28_1 | 7292(3)    | 1052(2)    | 5884.2(15) | 41.1(14) |
| C29_1 | 7914(2)    | 2139(2)    | 6592.9(9)  | 38.2(13) |
| C30_1 | 8383(3)    | 2138(3)    | 6840.5(11) | 46.5(15) |
| C31_1 | 8255(3)    | 1842(4)    | 7135.8(12) | 70(2)    |
| C32_1 | 7646(4)    | 1539(3)    | 7180.2(13) | 70(2)    |
| C33_1 | 7171(3)    | 1538(3)    | 6944.0(14) | 62(2)    |
| C34_1 | 7309(2)    | 1838(3)    | 6646.6(12) | 43.2(15) |
| C35_1 | 9519.8(17) | 4753(2)    | 6609.7(10) | 34.6(12) |
| C36_1 | 9690(2)    | 5467(2)    | 6688.9(14) | 40.9(14) |
| C37_1 | 10075(2)   | 4478(3)    | 6392.8(14) | 47.9(16) |
| C38_1 | 9479(3)    | 4339(3)    | 6919.3(12) | 44.4(15) |
| O1_2  | 7096.7(17) | 4728.3(15) | 7156.8(7)  | 24.9(7)  |
| O2_2  | 6550.9(17) | 4581.1(15) | 6681.4(6)  | 20.5(6)  |
| O3_2  | 6149.4(17) | 2759.8(19) | 6585.5(9)  | 34.4(9)  |
| O4_2  | 5288.0(16) | 4395.6(15) | 7211.2(8)  | 26.2(7)  |
| N1_2  | 5872.9(13) | 3573.7(15) | 6950.1(8)  | 21.0(8)  |
| C1_2  | 6741(2)    | 4409.1(17) | 6963.5(8)  | 20.7(9)  |
| C2_2  | 6547.6(16) | 3706.7(16) | 7057.3(8)  | 22.5(9)  |
| C3_2  | 5727.0(16) | 3089.4(19) | 6720.0(10) | 24.1(9)  |
| C4_2  | 4991.9(16) | 3085.2(19) | 6677.9(9)  | 21.7(9)  |
| C5_2  | 4726.1(15) | 3538(2)    | 6895.7(10) | 23.1(9)  |
| C6_2  | 5297.1(16) | 3907.8(18) | 7043.9(10) | 20.5(8)  |
| C7_2  | 4041.6(15) | 3623(2)    | 6935.9(9)  | 23.2(9)  |
| C8_2  | 3626.0(15) | 3247(2)    | 6728.6(9)  | 23.6(9)  |
| C9_2  | 3891.2(16) | 2802(2)    | 6502.2(10) | 29.5(10) |
| C10_2 | 4592.9(16) | 2707.8(18) | 6475.2(9)  | 23.9(9)  |
| C11_2 | 4875(2)    | 2205.3(17) | 6250.4(10) | 26.9(10) |
| C12_2 | 4730(3)    | 1551.8(19) | 6283.2(12) | 35.3(12) |
| C13_2 | 5020(3)    | 1094(2)    | 6076.8(13) | 44.1(14) |
| C14_2 | 5461(3)    | 1283(3)    | 5842.7(14) | 51.7(16) |
| C15_2 | 5610(3)    | 1929(3)    | 5804.6(13) | 44.4(15) |
| C16_2 | 5332(3)    | 2403(2)    | 6008.9(12) | 31.7(11) |
| C17_2 | 3438(2)    | 2444(2)    | 6273.3(9)  | 32.7(11) |

| Atom  | x          | y          | z          | U <sub>eq</sub> |
|-------|------------|------------|------------|-----------------|
| C18_2 | 3415(3)    | 2607(3)    | 5946.5(10) | 35.5(12)        |
| C19_2 | 2962(3)    | 2294(3)    | 5736.8(12) | 47.4(15)        |
| C20_2 | 2530(3)    | 1846(3)    | 5859.2(14) | 53.7(16)        |
| C21_2 | 2562(3)    | 1656(3)    | 6179.8(14) | 50.7(16)        |
| C22_2 | 3002(3)    | 1967(3)    | 6390.8(12) | 41.3(14)        |
| C23_2 | 2888.4(16) | 3307(3)    | 6759.6(10) | 32.8(11)        |
| C24_2 | 2561(2)    | 3143(3)    | 7046.3(11) | 44.9(15)        |
| C25_2 | 1879(2)    | 3206(4)    | 7073.7(14) | 58.7(19)        |
| C26_2 | 1514(2)    | 3457(4)    | 6825.0(16) | 58.5(19)        |
| C27_2 | 1826(2)    | 3641(4)    | 6541.3(14) | 51.1(16)        |
| C28_2 | 2517(2)    | 3568(3)    | 6503.9(12) | 37.5(12)        |
| C29_2 | 3760(2)    | 4047.4(19) | 7197.1(8)  | 22.4(9)         |
| C30_2 | 3886(3)    | 3903(2)    | 7520.6(9)  | 34.1(12)        |
| C31_2 | 3598(3)    | 4262(3)    | 7768.0(10) | 35.3(12)        |
| C32_2 | 3196(3)    | 4787(2)    | 7687.0(11) | 39.1(13)        |
| C33_2 | 3083(3)    | 4958(2)    | 7372.2(11) | 39.8(13)        |
| C34_2 | 3364(3)    | 4581(2)    | 7124.8(10) | 34.2(12)        |
| C35_2 | 6699.7(19) | 3480.0(18) | 7411.7(8)  | 26.2(10)        |
| C36_2 | 7454.5(19) | 3395(3)    | 7448.4(12) | 34.6(12)        |
| C37_2 | 6373(3)    | 2807(2)    | 7456.2(12) | 34.4(12)        |
| C38_2 | 6427(3)    | 3946(2)    | 7671.1(10) | 30.8(12)        |
| O1_3  | 6520.9(14) | 6016.7(17) | 7187.7(7)  | 21.2(7)         |
| O2_3  | 5999.8(15) | 5859.7(17) | 6708.7(6)  | 21.7(7)         |
| O3_3  | 4007.0(17) | 5913.1(15) | 6940.4(10) | 31.1(8)         |
| O4_3  | 5696.9(14) | 7404.3(18) | 6870.9(10) | 30.7(8)         |
| N1_3  | 4942.4(14) | 6571.8(14) | 6969.9(8)  | 20.1(8)         |
| C1_3  | 6017.6(16) | 6010(2)    | 7008.3(8)  | 22.7(9)         |
| C2_3  | 5334.3(16) | 6122.7(17) | 7165.7(7)  | 20.6(9)         |
| C3_3  | 4285.3(17) | 6428.5(17) | 6881.0(12) | 25.4(10)        |
| C4_3  | 4021.7(17) | 7016.6(17) | 6710.9(11) | 26.3(10)        |
| C5_3  | 4536.0(17) | 7472.4(17) | 6687.5(11) | 25.0(10)        |
| C6_3  | 5140.1(17) | 7179.7(18) | 6847.1(13) | 27.4(10)        |
| C7_3  | 4437.5(16) | 8091.9(16) | 6552.8(11) | 24.0(10)        |
| C8_3  | 3785.2(16) | 8234.8(17) | 6439.4(11) | 25.7(10)        |
| C9_3  | 3260.2(16) | 7783.1(17) | 6470.9(11) | 24.7(10)        |
| C10_3 | 3377.1(16) | 7149.9(16) | 6606.7(10) | 23.7(9)         |
| C11_3 | 2825.2(18) | 6666.8(18) | 6647.3(10) | 26.8(10)        |
| C12_3 | 2335(3)    | 6751(2)    | 6875.9(13) | 38.7(13)        |
| C13_3 | 1855(3)    | 6268(3)    | 6922.8(14) | 44.8(14)        |
| C14_3 | 1853(3)    | 5711(2)    | 6739.1(13) | 41.1(12)        |
| C15_3 | 2331(2)    | 5621(2)    | 6508.5(15) | 43.4(13)        |
| C16_3 | 2831(3)    | 6088(2)    | 6460.5(13) | 38.1(13)        |
| C17_3 | 2586.1(19) | 7929(2)    | 6331.2(11) | 33.9(11)        |
| C18_3 | 2387(2)    | 7654(3)    | 6038.7(11) | 39.2(13)        |
| C19_3 | 1757(3)    | 7800(3)    | 5907.1(13) | 51.1(16)        |
| C20_3 | 1337(3)    | 8198(3)    | 6073.8(16) | 57.2(17)        |
| C21_3 | 1516(3)    | 8462(3)    | 6369.0(16) | 56.1(18)        |
| C22_3 | 2143(2)    | 8334(3)    | 6498.3(14) | 48.1(16)        |
| C23_3 | 3661(2)    | 8871.5(18) | 6271.5(10) | 29.1(11)        |
| C24_3 | 3321(3)    | 9382(2)    | 6422.1(13) | 41.9(14)        |
| C25_3 | 3270(3)    | 9989(2)    | 6275.5(14) | 44.9(15)        |
| C26_3 | 3522(3)    | 10092(2)   | 5973.2(14) | 47.6(15)        |
| C27_3 | 3864(4)    | 9597(3)    | 5818.7(13) | 51.3(16)        |
| C28_3 | 3940(3)    | 8982(2)    | 5965.3(11) | 39.0(13)        |
| C29_3 | 4983.7(18) | 8585.1(17) | 6521.5(11) | 25.9(10)        |
| C30_3 | 4913(2)    | 9194.9(18) | 6666.6(11) | 27.2(11)        |
| C31_3 | 5378(2)    | 9683.8(19) | 6618.9(12) | 29.4(11)        |
| C32_3 | 5890(3)    | 9575(2)    | 6400.7(14) | 37.6(13)        |
| C33_3 | 5966(2)    | 8988(2)    | 6248.0(13) | 29.0(11)        |
| C34_3 | 5504(2)    | 8491(2)    | 6307.1(12) | 25.7(10)        |
| C35_3 | 5324.7(18) | 6280.3(18) | 7537.1(8)  | 22.4(9)         |
| C36_3 | 5659(3)    | 5720(2)    | 7723.2(10) | 30.8(11)        |
| C37_3 | 4593(2)    | 6306(3)    | 7643.4(13) | 35.7(13)        |

| Atom   | x          | y          | z          | U <sub>eq</sub> |
|--------|------------|------------|------------|-----------------|
| C38_3  | 5655(3)    | 6937(2)    | 7616.8(11) | 28.9(11)        |
| O1_4   | 7664.5(17) | 6560.2(15) | 6863.8(6)  | 21.1(6)         |
| O2_4   | 7183.1(17) | 6385.2(15) | 6375.8(7)  | 22.2(7)         |
| O3_4   | 7225.6(15) | 8155.8(18) | 5900.4(8)  | 28.5(8)         |
| O4_4   | 8757.2(18) | 6698.2(17) | 6286.6(8)  | 29.2(8)         |
| N1_4   | 7946.7(16) | 7474.4(16) | 6179.6(7)  | 23.0(8)         |
| C1_4   | 7486(2)    | 6732.9(16) | 6585.3(8)  | 19.7(8)         |
| C2_4   | 7581.4(18) | 7451.9(15) | 6484.4(7)  | 21.8(9)         |
| C3_4   | 7737.3(18) | 7837(2)    | 5909.5(8)  | 22.2(9)         |
| C4_4   | 8256.3(18) | 7753(2)    | 5654.5(8)  | 21.9(9)         |
| C5_4   | 8731.6(18) | 7318(2)    | 5774.6(8)  | 20.4(9)         |
| C6_4   | 8521(2)    | 7113(2)    | 6109.8(8)  | 23.3(9)         |
| C7_4   | 9279.0(17) | 7111(2)    | 5592.7(8)  | 22.0(9)         |
| C8_4   | 9323.7(17) | 7358(2)    | 5271.5(8)  | 22.3(9)         |
| C9_4   | 8851.5(17) | 7803.2(18) | 5148.9(8)  | 18.6(9)         |
| C10_4  | 8290.3(18) | 7996.8(18) | 5339.6(7)  | 20.1(9)         |
| C11_4  | 7783(2)    | 8451.0(18) | 5199.0(9)  | 24.5(10)        |
| C12_4  | 7668(3)    | 9063(2)    | 5325.3(11) | 33.1(11)        |
| C13_4  | 7236(3)    | 9492(2)    | 5168.3(12) | 37.2(12)        |
| C14_4  | 6940(3)    | 9322(2)    | 4882.1(12) | 40.4(13)        |
| C15_4  | 7049(3)    | 8719(2)    | 4751.0(12) | 38.4(13)        |
| C16_4  | 7469(3)    | 8270(2)    | 4905.5(10) | 29.6(11)        |
| C17_4  | 8966(2)    | 8129.3(19) | 4827.0(9)  | 26.5(10)        |
| C18_4  | 8957(3)    | 7779(2)    | 4538.6(10) | 32.8(11)        |
| C19_4  | 9078(3)    | 8096(3)    | 4240.3(10) | 38.7(13)        |
| C20_4  | 9191(3)    | 8751(3)    | 4236.1(11) | 42.3(14)        |
| C21_4  | 9201(3)    | 9110(2)    | 4519.3(12) | 39.6(13)        |
| C22_4  | 9066(3)    | 8806(2)    | 4814.7(11) | 34.7(12)        |
| C23_4  | 9918.8(18) | 7198(2)    | 5069.5(9)  | 27.0(10)        |
| C24_4  | 10484(2)   | 7593(2)    | 5070.5(14) | 38.2(13)        |
| C25_4  | 11021(2)   | 7453(3)    | 4872.2(16) | 52.0(16)        |
| C26_4  | 10992(3)   | 6950(3)    | 4656.1(15) | 56.3(17)        |
| C27_4  | 10437(3)   | 6553(3)    | 4648.4(15) | 55.9(17)        |
| C28_4  | 9894(2)    | 6669(2)    | 4854.9(12) | 36.7(13)        |
| C29_4  | 9820.4(19) | 6700.3(18) | 5735.7(9)  | 21.7(9)         |
| C30_4  | 10169(2)   | 6920(2)    | 6005.8(12) | 34.2(12)        |
| C31_4  | 10705(2)   | 6574(3)    | 6127.7(12) | 38.0(12)        |
| C32_4  | 10862(3)   | 5976(3)    | 5990.1(13) | 40.9(13)        |
| C33_4  | 10512(3)   | 5733(2)    | 5733.8(14) | 42.0(14)        |
| C34_4  | 9989(2)    | 6101(2)    | 5604.5(12) | 31.8(11)        |
| C35_4  | 7861(2)    | 7927.9(17) | 6748.5(9)  | 27.7(10)        |
| C36_4  | 7402(3)    | 7909(2)    | 7045.5(10) | 40.0(14)        |
| C37_4  | 7830(3)    | 8621.6(19) | 6605.1(12) | 36.3(13)        |
| C38_4  | 8582(2)    | 7778(3)    | 6842.7(14) | 41.8(14)        |
| Cl1_6  | 6347.3(16) | 4809.5(13) | 3951.1(7)  | 86.1(8)         |
| Cl2_6  | 6937.2(14) | 4803.1(12) | 4589.3(6)  | 74.3(6)         |
| Cl1_6  | 6780(5)    | 5278(4)    | 4241(2)    | 61(2)           |
| Cl3_8  | 6901.3(10) | 4252.9(8)  | 5875.9(4)  | 49.5(4)         |
| N2_8   | 6405(2)    | 5392.1(19) | 6009.3(9)  | 28.1(8)         |
| C39_8  | 6496(3)    | 4972(2)    | 5770.9(11) | 36.1(10)        |
| C40_8  | 6300(3)    | 5039(3)    | 5455.1(12) | 46.4(13)        |
| C41_8  | 5979(4)    | 5617(3)    | 5377.5(13) | 50.8(14)        |
| C42_8  | 5848(3)    | 6080(3)    | 5609.0(12) | 37.7(11)        |
| C43_8  | 6063(3)    | 5946(2)    | 5928.3(12) | 31.4(9)         |
| Cl3_9  | 7639.0(11) | 6475.5(8)  | 4654.3(4)  | 52.7(4)         |
| N2_9   | 7487(3)    | 6451(2)    | 5278.7(10) | 47.4(11)        |
| C39_9  | 7805(3)    | 6163(3)    | 5038.1(12) | 41.6(11)        |
| C40_9  | 8246(3)    | 5656(3)    | 5057.7(13) | 47.1(12)        |
| C41_9  | 8360(4)    | 5411(3)    | 5365.6(14) | 54.9(15)        |
| C42_9  | 8051(4)    | 5672(3)    | 5631.5(14) | 58.3(15)        |
| C43_9  | 7605(3)    | 6195(3)    | 5579.5(12) | 49.1(12)        |
| Cl3_10 | 7299(3)    | 5526(5)    | 7934.6(13) | 111(3)          |
| N2_10  | 8074(6)    | 5947(9)    | 7480.2(18) | 60.7(15)        |

| Atom   | x        | y          | z          | $U_{eq}$ |
|--------|----------|------------|------------|----------|
| C39_10 | 8026(6)  | 5891(11)   | 7797.8(18) | 63.8(15) |
| C40_10 | 8479(6)  | 6087(10)   | 8025(2)    | 61(2)    |
| C41_10 | 9022(7)  | 6429(10)   | 7908(3)    | 65(3)    |
| C42_10 | 9135(8)  | 6487(14)   | 7582(3)    | 81(7)    |
| C43_10 | 8635(7)  | 6254(11)   | 7371(2)    | 65(4)    |
| Cl3_13 | 7504(2)  | 6675.2(17) | 7722.4(9)  | 70.4(11) |
| N2_13  | 7930(6)  | 5559(4)    | 7514.7(16) | 60.7(15) |
| C39_13 | 7892(7)  | 5924(5)    | 7777.3(18) | 63.8(15) |
| C40_13 | 8157(11) | 5794(6)    | 8076(2)    | 99(6)    |
| C41_13 | 8429(10) | 5177(6)    | 8113(2)    | 89(5)    |
| C42_13 | 8524(9)  | 4773(5)    | 7852(2)    | 79(4)    |
| C43_13 | 8243(6)  | 4971(4)    | 7554(2)    | 59(3)    |

Table 2: Anisotropic Displacement Parameters ( $\times 10^3$ ) JCS-Pyridine-TPPTTL-CoXtal-xtal2. The anisotropic displacement factor exponent takes the form:  $-2\pi^2[h^2a^{*2} \times U_{11} + \dots + 2hka^* \times b^* \times U_{12}]$

| Atom  | $U_{11}$  | $U_{22}$  | $U_{33}$  | $U_{23}$ | $U_{13}$ | $U_{12}$  |
|-------|-----------|-----------|-----------|----------|----------|-----------|
| Rh1   | 21.98(16) | 19.39(16) | 14.64(14) | 1.71(12) | 1.31(12) | -1.71(13) |
| Rh2   | 22.74(16) | 16.51(15) | 14.67(14) | 0.78(12) | 0.07(13) | -1.57(13) |
| O1_1  | 16.8(16)  | 24.6(17)  | 20.9(15)  | -1.1(12) | -4.4(12) | 4.5(13)   |
| O2_1  | 35.4(19)  | 17.0(16)  | 18.0(15)  | -6.0(12) | 0.7(13)  | 2.3(14)   |
| O3_1  | 46(2)     | 28.9(19)  | 24.1(17)  | 10.1(15) | 12.4(16) | 0.7(17)   |
| O4_1  | 64(3)     | 21.7(18)  | 33.0(19)  | 6.2(15)  | 23(2)    | -1.9(19)  |
| N1_1  | 30(2)     | 17.8(18)  | 30(2)     | 7.7(15)  | 13.7(18) | 2.6(16)   |
| C1_1  | 31(2)     | 18(2)     | 23(2)     | 0.6(17)  | 0.4(17)  | -9.4(18)  |
| C2_1  | 35(3)     | 16(2)     | 34(3)     | 9.4(18)  | -3(2)    | 2.9(19)   |
| C3_1  | 28(3)     | 24(2)     | 29(2)     | 8.5(18)  | 8(2)     | 6.0(19)   |
| C4_1  | 37(3)     | 24(2)     | 33(2)     | 6.8(19)  | 11(2)    | 4(2)      |
| C5_1  | 36(3)     | 25(2)     | 34(3)     | 4.7(19)  | 11(2)    | 2(2)      |
| C6_1  | 43(3)     | 24(2)     | 30(2)     | 6.1(19)  | 9(2)     | 3(2)      |
| C7_1  | 56(4)     | 21(2)     | 42(3)     | 8(2)     | 17(3)    | 6(2)      |
| C8_1  | 42(3)     | 20(2)     | 47(3)     | 6(2)     | 7(3)     | 0(2)      |
| C9_1  | 43(4)     | 41(3)     | 50(3)     | 6(2)     | 14(3)    | -13(3)    |
| C10_1 | 43(3)     | 31(3)     | 33(3)     | 2(2)     | 7(2)     | -4(2)     |
| C11_1 | 42(3)     | 29(3)     | 30(3)     | -1(2)    | 9(2)     | -9(2)     |
| C12_1 | 50(3)     | 29(3)     | 32(3)     | -2(2)    | 7(2)     | -3(2)     |
| C13_1 | 59(4)     | 44(4)     | 42(3)     | 3(3)     | 20(3)    | 3(3)      |
| C14_1 | 69(5)     | 59(4)     | 29(3)     | 6(3)     | 6(3)     | 3(3)      |
| C15_1 | 60(4)     | 54(4)     | 28(3)     | 5(3)     | 4(3)     | 2(3)      |
| C16_1 | 52(4)     | 35(3)     | 27(3)     | -6(2)    | 8(2)     | 1(2)      |
| C17_1 | 67(3)     | 61(3)     | 62(3)     | -3(2)    | 4(2)     | -9(2)     |
| C18_1 | 83(3)     | 84(3)     | 82(3)     | 4(2)     | -2(2)    | -7(3)     |
| C19_1 | 107(4)    | 106(4)    | 103(4)    | -3(3)    | -1(3)    | -4(3)     |
| C20_1 | 113(4)    | 112(4)    | 111(4)    | 1(3)     | -1(3)    | -1(3)     |
| C21_1 | 95(4)     | 88(4)     | 91(3)     | -4(2)    | 6(2)     | -5(3)     |
| C22_1 | 79(3)     | 74(3)     | 77(3)     | -1(2)    | 6(2)     | -2(2)     |
| C23_1 | 40(3)     | 21(2)     | 40(3)     | 2(2)     | 14(2)    | -3(2)     |
| C24_1 | 42(3)     | 24(2)     | 46(3)     | -4(2)    | 11(3)    | -2(2)     |
| C25_1 | 60(4)     | 28(3)     | 47(3)     | -1(2)    | 4(3)     | -12(3)    |
| C26_1 | 48(3)     | 21(2)     | 53(3)     | 4(2)     | 7(3)     | -5(2)     |
| C27_1 | 45(3)     | 37(3)     | 39(3)     | 2(2)     | 8(3)     | -2(2)     |
| C28_1 | 43(3)     | 30(3)     | 50(4)     | 2(2)     | 8(3)     | -3(2)     |
| C29_1 | 62(3)     | 10(2)     | 42(3)     | 2(2)     | 21(2)    | 1(2)      |
| C30_1 | 75(4)     | 22(3)     | 43(3)     | -1(2)    | 13(3)    | -3(3)     |
| C31_1 | 121(6)    | 38(4)     | 52(4)     | 12(3)    | 23(4)    | 12(4)     |
| C32_1 | 126(6)    | 31(3)     | 52(4)     | 9(3)     | 51(4)    | 10(4)     |
| C33_1 | 98(5)     | 23(3)     | 64(4)     | 12(3)    | 59(3)    | 5(3)      |
| C34_1 | 59(4)     | 17(2)     | 54(3)     | 10(2)    | 31(3)    | 7(2)      |
| C35_1 | 25(2)     | 35(3)     | 44(3)     | 7(2)     | 2(2)     | 6(2)      |
| C36_1 | 23(3)     | 49(3)     | 51(4)     | -12(3)   | -5(2)    | -5(2)     |
| C37_1 | 33(3)     | 51(4)     | 61(4)     | -6(3)    | -1(3)    | 20(3)     |
| C38_1 | 41(3)     | 48(4)     | 44(3)     | 13(3)    | -4(3)    | 9(3)      |

| Atom  | $U_{11}$ | $U_{22}$ | $U_{33}$ | $U_{23}$ | $U_{13}$ | $U_{12}$ |
|-------|----------|----------|----------|----------|----------|----------|
| O1_2  | 31.8(18) | 18.5(16) | 24.4(16) | 10.4(13) | -1.1(14) | -1.0(13) |
| O2_2  | 27.5(17) | 15.4(15) | 18.4(14) | 1.8(12)  | 0.1(12)  | -3.1(13) |
| O3_2  | 34(2)    | 34(2)    | 35(2)    | -8.7(16) | -2.0(16) | 9.6(16)  |
| O4_2  | 25.0(17) | 21.9(17) | 31.9(18) | -4.1(14) | 1.4(14)  | -2.7(14) |
| N1_2  | 24.4(19) | 16.8(18) | 21.8(19) | 4.2(14)  | 6.2(15)  | 1.7(15)  |
| C1_2  | 26(2)    | 21(2)    | 15.6(18) | 4.8(15)  | 2.4(15)  | 0.3(17)  |
| C2_2  | 28(2)    | 19(2)    | 21(2)    | 0.6(17)  | 3.1(18)  | 1.8(17)  |
| C3_2  | 32(2)    | 13(2)    | 28(2)    | 4.9(17)  | 3.0(19)  | 5.3(17)  |
| C4_2  | 29(2)    | 15(2)    | 21(2)    | 3.1(16)  | 4.6(17)  | 1.5(17)  |
| C5_2  | 24(2)    | 22(2)    | 24(2)    | -5.1(18) | -0.9(17) | 2.2(18)  |
| C6_2  | 22(2)    | 18.7(19) | 21(2)    | 3.7(16)  | 1.6(17)  | 1.0(16)  |
| C7_2  | 22(2)    | 18(2)    | 30(2)    | -4.5(18) | -2.9(18) | 0.8(17)  |
| C8_2  | 24(2)    | 21(2)    | 25(2)    | -3.5(18) | -0.9(18) | -5.8(18) |
| C9_2  | 41(3)    | 23(2)    | 24(2)    | 3.7(19)  | 7(2)     | -2.2(19) |
| C10_2 | 35(2)    | 19(2)    | 17(2)    | 2.7(17)  | 1.4(18)  | -2.8(18) |
| C11_2 | 36(3)    | 20(2)    | 25(2)    | -6.2(18) | -4.9(19) | 0.7(19)  |
| C12_2 | 47(3)    | 24(2)    | 35(3)    | -5(2)    | -17(2)   | 4(2)     |
| C13_2 | 48(3)    | 30(3)    | 55(3)    | -17(2)   | -28(2)   | 11(2)    |
| C14_2 | 56(4)    | 51(3)    | 49(4)    | -23(3)   | -16(3)   | 22(3)    |
| C15_2 | 36(3)    | 56(3)    | 42(3)    | -23(3)   | -5(3)    | 17(3)    |
| C16_2 | 34(3)    | 31(3)    | 30(3)    | -8(2)    | 5(2)     | 5(2)     |
| C17_2 | 37(3)    | 27(3)    | 34(3)    | -2(2)    | 1(2)     | 3(2)     |
| C18_2 | 43(3)    | 31(3)    | 33(3)    | -3(2)    | -1(2)    | 2(2)     |
| C19_2 | 58(4)    | 51(4)    | 34(3)    | -20(3)   | -10(3)   | 8(3)     |
| C20_2 | 44(4)    | 54(4)    | 63(4)    | -19(3)   | -18(3)   | 2(3)     |
| C21_2 | 45(4)    | 38(3)    | 69(4)    | -15(3)   | -7(3)    | -2(3)    |
| C22_2 | 50(4)    | 32(3)    | 42(3)    | 2(2)     | -1(3)    | -4(2)    |
| C23_2 | 24(2)    | 38(3)    | 37(3)    | -4(2)    | -2(2)    | -2(2)    |
| C24_2 | 28(3)    | 68(4)    | 38(3)    | -12(3)   | 3(2)     | -15(3)   |
| C25_2 | 25(3)    | 98(6)    | 53(4)    | -19(4)   | 8(3)     | -12(3)   |
| C26_2 | 34(3)    | 67(5)    | 74(4)    | -6(4)    | 9(3)     | 9(3)     |
| C27_2 | 32(3)    | 60(4)    | 62(4)    | -8(3)    | -1(3)    | 16(3)    |
| C28_2 | 31(3)    | 36(3)    | 46(3)    | 0(3)     | -5(2)    | 3(2)     |
| C29_2 | 21(2)    | 21(2)    | 25(2)    | -2.5(17) | 3.9(18)  | -3.5(17) |
| C30_2 | 36(3)    | 42(3)    | 24(2)    | -6(2)    | 0(2)     | -7(2)    |
| C31_2 | 37(3)    | 40(3)    | 29(3)    | -10(2)   | 7(2)     | -12(2)   |
| C32_2 | 50(3)    | 29(3)    | 39(3)    | -16(2)   | 13(3)    | -10(2)   |
| C33_2 | 42(3)    | 33(3)    | 45(3)    | -12(2)   | 6(3)     | 3(3)     |
| C34_2 | 37(3)    | 31(3)    | 34(3)    | -1(2)    | 4(2)     | 4(2)     |
| C35_2 | 31(2)    | 27(2)    | 20(2)    | 8.2(18)  | 1.0(19)  | 5.7(19)  |
| C36_2 | 24(2)    | 46(3)    | 33(3)    | 18(2)    | 2(2)     | 6(2)     |
| C37_2 | 48(3)    | 29(3)    | 26(3)    | 6(2)     | 7(2)     | -1(2)    |
| C38_2 | 48(3)    | 24(3)    | 20(2)    | 0.6(19)  | 3(2)     | -3(2)    |
| O1_3  | 21.7(16) | 22.4(17) | 19.3(15) | 1.2(13)  | 1.0(12)  | -0.1(13) |
| O2_3  | 19.8(16) | 24.6(17) | 20.8(15) | 4.2(13)  | -2.0(13) | 4.4(13)  |
| O3_3  | 27.7(18) | 24.9(17) | 41(2)    | 10.9(15) | -3.7(16) | -0.4(14) |
| O4_3  | 24.0(17) | 32(2)    | 36(2)    | 12.3(16) | -3.7(15) | -5.4(15) |
| N1_3  | 20.6(18) | 19.5(18) | 20.2(19) | 6.1(15)  | -3.0(15) | 0.6(14)  |
| C1_3  | 28(2)    | 18(2)    | 21.9(19) | 7.2(17)  | -1.8(17) | -3.4(17) |
| C2_3  | 29(2)    | 18(2)    | 14.6(19) | 7.0(16)  | -4.7(17) | -1.2(18) |
| C3_3  | 22(2)    | 22(2)    | 32(3)    | -1.1(19) | -2.4(19) | 2.1(17)  |
| C4_3  | 29(2)    | 30(2)    | 20(2)    | -1.2(18) | -7.5(19) | 3.2(19)  |
| C5_3  | 28(2)    | 26(2)    | 22(2)    | 4.1(18)  | -0.4(19) | 6.6(18)  |
| C6_3  | 22(2)    | 22(2)    | 38(3)    | 5(2)     | -2(2)    | -3.7(17) |
| C7_3  | 23(2)    | 26(2)    | 23(2)    | 6.1(18)  | -5.9(18) | -7.2(17) |
| C8_3  | 27(2)    | 25(2)    | 25(2)    | 12.3(19) | -1.6(19) | 1.0(18)  |
| C9_3  | 22(2)    | 28(2)    | 24(2)    | 4.2(19)  | 3.0(18)  | 2.2(17)  |
| C10_3 | 26(2)    | 23(2)    | 23(2)    | 0.9(17)  | -4.2(18) | 0.2(17)  |
| C11_3 | 27(2)    | 25(2)    | 28(2)    | 5.7(19)  | -1.3(19) | 4.8(18)  |
| C12_3 | 38(3)    | 35(3)    | 44(3)    | 2(2)     | 14(3)    | 2(2)     |
| C13_3 | 41(3)    | 53(3)    | 40(3)    | -5(3)    | 5(3)     | -11(3)   |
| C14_3 | 40(3)    | 41(3)    | 42(3)    | 7(2)     | -10(2)   | -8(3)    |
| C15_3 | 33(3)    | 36(3)    | 60(4)    | 1(3)     | -9(2)    | -4(2)    |

| Atom  | $U_{11}$ | $U_{22}$ | $U_{33}$ | $U_{23}$ | $U_{13}$ | $U_{12}$ |
|-------|----------|----------|----------|----------|----------|----------|
| C16_3 | 39(3)    | 34(3)    | 42(3)    | -7(2)    | 0(3)     | -5(2)    |
| C17_3 | 30(3)    | 36(3)    | 37(3)    | 11(2)    | -8(2)    | -1(2)    |
| C18_3 | 29(3)    | 53(4)    | 36(3)    | 10(2)    | -14(2)   | -2(3)    |
| C19_3 | 30(3)    | 63(4)    | 60(4)    | 33(3)    | -16(3)   | -12(3)   |
| C20_3 | 28(3)    | 54(4)    | 90(5)    | 35(3)    | -15(3)   | -2(3)    |
| C21_3 | 30(3)    | 60(4)    | 79(4)    | 35(3)    | 0(3)     | 12(3)    |
| C22_3 | 35(3)    | 59(4)    | 50(4)    | 14(3)    | 0(3)     | 14(3)    |
| C23_3 | 28(3)    | 26(2)    | 33(3)    | 9(2)     | -4(2)    | 9(2)     |
| C24_3 | 54(4)    | 28(3)    | 44(3)    | 5(2)     | 12(3)    | 15(3)    |
| C25_3 | 35(3)    | 33(3)    | 67(4)    | 15(3)    | 0(3)     | 9(2)     |
| C26_3 | 55(4)    | 36(3)    | 52(3)    | 17(3)    | -14(3)   | -8(3)    |
| C27_3 | 64(4)    | 42(3)    | 47(4)    | 20(3)    | -8(3)    | -9(3)    |
| C28_3 | 50(4)    | 38(3)    | 29(3)    | 7(2)     | 1(2)     | -6(3)    |
| C29_3 | 28(2)    | 24(2)    | 26(2)    | 4.6(19)  | 7(2)     | -5.8(18) |
| C30_3 | 41(3)    | 21(2)    | 20(2)    | 7.2(17)  | 13(2)    | 1.6(19)  |
| C31_3 | 41(3)    | 20(2)    | 27(2)    | 4.7(18)  | 3(2)     | 1(2)     |
| C32_3 | 41(3)    | 23(2)    | 49(3)    | 5(2)     | 10(2)    | -4(2)    |
| C33_3 | 23(2)    | 25(2)    | 38(3)    | 7(2)     | 8(2)     | -1.9(19) |
| C34_3 | 27(2)    | 20(2)    | 30(3)    | -0.4(19) | 3.8(19)  | -2.1(18) |
| C35_3 | 27(2)    | 21(2)    | 19(2)    | -0.8(17) | 1.7(18)  | 0.4(18)  |
| C36_3 | 39(3)    | 31(3)    | 23(2)    | 4(2)     | -2(2)    | 13(2)    |
| C37_3 | 28(3)    | 35(3)    | 45(3)    | -1(3)    | 7(2)     | 0(2)     |
| C38_3 | 35(3)    | 26(3)    | 25(2)    | -6(2)    | 0(2)     | -2(2)    |
| O1_4  | 22.1(16) | 21.4(16) | 19.8(14) | 4.0(12)  | 3.0(13)  | -1.8(13) |
| O2_4  | 27.9(18) | 23.4(17) | 15.4(14) | -1.8(12) | 1.9(13)  | 3.1(13)  |
| O3_4  | 30.5(19) | 29.1(19) | 25.8(18) | 3.0(14)  | 0.9(14)  | 6.8(15)  |
| O4_4  | 32(2)    | 27.8(19) | 27.4(18) | 7.7(14)  | -0.2(15) | 3.9(15)  |
| N1_4  | 27(2)    | 19.7(19) | 22.6(19) | 2.2(15)  | 4.6(16)  | 3.1(15)  |
| C1_4  | 16(2)    | 23(2)    | 20.6(19) | 2.5(15)  | 4.1(15)  | 2.4(16)  |
| C2_4  | 29(2)    | 19(2)    | 17.3(19) | -0.6(16) | -1.7(18) | -2.0(18) |
| C3_4  | 23(2)    | 21(2)    | 22(2)    | -1.1(17) | -1.4(16) | -1.0(17) |
| C4_4  | 19(2)    | 24(2)    | 22(2)    | 2.8(17)  | 0.2(17)  | 3.3(17)  |
| C5_4  | 18(2)    | 19(2)    | 24(2)    | 2.4(17)  | -2.4(17) | -0.6(17) |
| C6_4  | 25(2)    | 21(2)    | 24(2)    | 1.5(17)  | -0.6(18) | 2.6(18)  |
| C7_4  | 20(2)    | 23(2)    | 23(2)    | 5.7(18)  | 5.0(17)  | -2.0(17) |
| C8_4  | 17(2)    | 27(2)    | 23(2)    | 7.5(18)  | 1.2(17)  | -1.0(18) |
| C9_4  | 17(2)    | 18(2)    | 21(2)    | 6.0(16)  | -3.6(16) | -3.3(16) |
| C10_4 | 23(2)    | 14(2)    | 23(2)    | 1.9(16)  | -4.7(16) | -3.8(16) |
| C11_4 | 26(2)    | 22(2)    | 25(2)    | 5.1(18)  | -2.0(18) | 0.5(18)  |
| C12_4 | 41(3)    | 26(2)    | 32(3)    | 4(2)     | 6(2)     | 7(2)     |
| C13_4 | 48(3)    | 20(3)    | 43(3)    | 0(2)     | 2(2)     | 6(2)     |
| C14_4 | 43(3)    | 43(3)    | 36(3)    | 10(2)    | -1(2)    | 18(3)    |
| C15_4 | 39(3)    | 45(3)    | 31(3)    | 4(2)     | -6(2)    | 6(2)     |
| C16_4 | 33(3)    | 33(3)    | 23(2)    | 4.5(19)  | -8(2)    | 1(2)     |
| C17_4 | 27(3)    | 25(2)    | 27(2)    | 8.5(18)  | 3(2)     | -3(2)    |
| C18_4 | 33(3)    | 33(3)    | 32(2)    | 6(2)     | -2(2)    | -1(2)    |
| C19_4 | 38(3)    | 50(3)    | 27(3)    | 6(2)     | -7(2)    | 0(3)     |
| C20_4 | 44(3)    | 50(3)    | 33(3)    | 22(2)    | 7(3)     | -5(3)    |
| C21_4 | 39(3)    | 38(3)    | 41(3)    | 20(2)    | -6(2)    | -4(3)    |
| C22_4 | 35(3)    | 30(3)    | 39(3)    | 15(2)    | 1(2)     | -6(2)    |
| C23_4 | 27(2)    | 34(3)    | 21(2)    | 12.0(19) | 3.2(19)  | 2.8(19)  |
| C24_4 | 30(3)    | 36(3)    | 49(3)    | 15(3)    | 7(2)     | -2(2)    |
| C25_4 | 23(3)    | 70(4)    | 63(4)    | 24(3)    | 7(3)     | 8(3)     |
| C26_4 | 45(3)    | 78(5)    | 47(4)    | 24(3)    | 22(3)    | 30(3)    |
| C27_4 | 53(4)    | 66(5)    | 48(4)    | 0(3)     | 9(3)     | 32(3)    |
| C28_4 | 35(3)    | 49(3)    | 26(3)    | 0(2)     | 1(2)     | 12(3)    |
| C29_4 | 24(2)    | 21(2)    | 20(2)    | 10.8(17) | 0.9(17)  | -4.0(17) |
| C30_4 | 36(3)    | 28(3)    | 39(3)    | 1(2)     | -3(2)    | -5(2)    |
| C31_4 | 32(3)    | 49(3)    | 33(3)    | 13(2)    | -7(2)    | -10(2)   |
| C32_4 | 33(3)    | 46(3)    | 44(3)    | 20(2)    | -1(2)    | 10(2)    |
| C33_4 | 46(3)    | 34(3)    | 46(3)    | 7(2)     | 0(2)     | 16(3)    |
| C34_4 | 31(3)    | 31(3)    | 33(3)    | 3(2)     | 1(2)     | 6(2)     |
| C35_4 | 37(3)    | 24(2)    | 22(2)    | -5.6(18) | -4(2)    | -4(2)    |

| Atom   | $U_{11}$ | $U_{22}$ | $U_{33}$ | $U_{23}$  | $U_{13}$  | $U_{12}$  |
|--------|----------|----------|----------|-----------|-----------|-----------|
| C36_4  | 69(4)    | 22(2)    | 29(3)    | -9(2)     | 10(3)     | 0(3)      |
| C37_4  | 48(3)    | 33(3)    | 28(3)    | -1(2)     | -8(2)     | -3(2)     |
| C38_4  | 44(3)    | 40(3)    | 42(3)    | 0(3)      | -22(3)    | -6(3)     |
| Cl1_6  | 98.8(19) | 69.2(14) | 90.5(17) | -34.1(13) | -19.2(15) | 15.8(13)  |
| Cl2_6  | 85.5(16) | 60.5(12) | 76.8(14) | 12.9(10)  | 1.3(12)   | -0.5(12)  |
| Cl_6   | 60(5)    | 66(5)    | 58(4)    | -14(4)    | 0(4)      | -17(4)    |
| Cl3_8  | 58.4(9)  | 40.1(8)  | 50.0(8)  | -18.9(6)  | -8.4(8)   | 2.2(8)    |
| N2_8   | 25.8(18) | 36.3(16) | 22.2(14) | -3.6(11)  | -3.2(13)  | -12.4(13) |
| C39_8  | 33(2)    | 46.6(18) | 29.0(14) | -11.8(12) | -3.4(14)  | -9.9(16)  |
| C40_8  | 50(3)    | 58(2)    | 30.3(15) | -10.6(15) | -8.7(17)  | -9(2)     |
| C41_8  | 56(3)    | 64(2)    | 32.5(18) | -5.1(16)  | -6(2)     | -3(2)     |
| C42_8  | 31(3)    | 55(2)    | 27.3(16) | 2.1(14)   | -4.3(15)  | -10.0(19) |
| C43_8  | 27(2)    | 40.0(18) | 26.9(16) | 0.5(13)   | -2.5(15)  | -10.3(15) |
| Cl3_9  | 84.4(13) | 37.5(8)  | 36.3(7)  | 7.9(6)    | -2.8(8)   | 0.9(8)    |
| N2_9   | 53(3)    | 45(2)    | 44.2(16) | -7.1(14)  | 0.0(16)   | -14.1(19) |
| C39_9  | 54(3)    | 30(2)    | 40.5(18) | 1.3(15)   | 0.4(14)   | -13.3(17) |
| C40_9  | 61(3)    | 35(2)    | 45(2)    | 1.4(18)   | -1.6(19)  | -7(2)     |
| C41_9  | 67(4)    | 51(3)    | 47(2)    | 6.9(17)   | -2.2(18)  | -5(2)     |
| C42_9  | 66(3)    | 60(3)    | 49(2)    | 0(2)      | -2(2)     | -10(3)    |
| C43_9  | 54(3)    | 49(3)    | 43.9(17) | -5.8(18)  | -2.6(18)  | -21(2)    |
| Cl3_10 | 96(4)    | 195(8)   | 43(3)    | 1(4)      | -3(3)     | -71(5)    |
| N2_10  | 61(2)    | 67(2)    | 54.5(18) | -2.9(15)  | -1.1(17)  | -6.9(18)  |
| C39_10 | 69(3)    | 68(2)    | 54.5(18) | -3.3(15)  | -0.9(16)  | -6.6(19)  |
| C40_10 | 65(3)    | 63(4)    | 56(2)    | -4.5(19)  | -0.8(17)  | -2(2)     |
| C41_10 | 65(3)    | 67(4)    | 63(3)    | 0(2)      | -1(2)     | -2(2)     |
| C42_10 | 67(6)    | 112(17)  | 63(3)    | 1(3)      | -2(2)     | -24(9)    |
| C43_10 | 60(4)    | 72(10)   | 63(3)    | 4(4)      | -3(3)     | -7(6)     |
| Cl3_13 | 91(3)    | 63(2)    | 57.0(19) | -10.9(14) | -7.2(18)  | 1.7(18)   |
| N2_13  | 61(2)    | 67(2)    | 54.5(18) | -2.9(15)  | -1.1(17)  | -6.9(18)  |
| C39_13 | 69(3)    | 68(2)    | 54.5(18) | -3.3(15)  | -0.9(16)  | -6.6(19)  |
| C40_13 | 144(15)  | 90(6)    | 63(3)    | -13(3)    | -25(5)    | 27(7)     |
| C41_13 | 120(13)  | 87(6)    | 59(4)    | -11(3)    | -21(5)    | 18(7)     |
| C42_13 | 103(10)  | 77(6)    | 56(4)    | -5(3)     | -14(5)    | 7(6)      |
| C43_13 | 58(6)    | 67(3)    | 51(3)    | -1(2)     | 2(4)      | -7(3)     |

Table 3: Bond Lengths in Å for JCS-Pyridine-TPPTTL-CoXtal-xtal2.

| Atom | Atom  | Length/Å  | Atom  | Atom  | Length/Å |
|------|-------|-----------|-------|-------|----------|
| Rh1  | Rh2   | 2.3998(5) | C5_1  | C7_1  | 1.393(4) |
| Rh1  | O1_1  | 2.057(3)  | C7_1  | C8_1  | 1.419(4) |
| Rh1  | O1_2  | 2.040(3)  | C7_1  | C29_1 | 1.493(4) |
| Rh1  | O1_3  | 2.032(3)  | C8_1  | C9_1  | 1.406(4) |
| Rh1  | O1_4  | 2.052(3)  | C8_1  | C23_1 | 1.492(4) |
| Rh1  | N2_10 | 2.383(9)  | C9_1  | C10_1 | 1.426(4) |
| Rh1  | N2_13 | 2.278(7)  | C9_1  | C17_1 | 1.500(4) |
| Rh2  | O2_1  | 2.048(3)  | C10_1 | C11_1 | 1.492(4) |
| Rh2  | O2_2  | 2.053(3)  | C11_1 | C12_1 | 1.372(4) |
| Rh2  | O2_3  | 2.074(3)  | C11_1 | C16_1 | 1.410(4) |
| Rh2  | O2_4  | 2.041(3)  | C12_1 | C13_1 | 1.390(5) |
| Rh2  | N2_8  | 2.272(4)  | C13_1 | C14_1 | 1.365(5) |
| O1_1 | C1_1  | 1.250(3)  | C14_1 | C15_1 | 1.361(5) |
| O2_1 | C1_1  | 1.271(3)  | C15_1 | C16_1 | 1.398(4) |
| O3_1 | C3_1  | 1.216(4)  | C17_1 | C18_1 | 1.385(5) |
| O4_1 | C6_1  | 1.211(4)  | C17_1 | C22_1 | 1.395(5) |
| N1_1 | C2_1  | 1.451(4)  | C18_1 | C19_1 | 1.408(5) |
| N1_1 | C3_1  | 1.399(4)  | C19_1 | C20_1 | 1.356(6) |
| N1_1 | C6_1  | 1.399(4)  | C20_1 | C21_1 | 1.376(6) |
| C1_1 | C2_1  | 1.535(4)  | C21_1 | C22_1 | 1.392(5) |
| C2_1 | C35_1 | 1.559(4)  | C23_1 | C24_1 | 1.392(5) |
| C3_1 | C4_1  | 1.487(4)  | C23_1 | C28_1 | 1.395(5) |
| C4_1 | C5_1  | 1.394(4)  | C24_1 | C25_1 | 1.382(5) |
| C4_1 | C10_1 | 1.390(4)  | C25_1 | C26_1 | 1.359(6) |
| C5_1 | C6_1  | 1.501(4)  | C26_1 | C27_1 | 1.376(6) |

| Atom  | Atom  | Length/Å |
|-------|-------|----------|
| C27_1 | C28_1 | 1.402(5) |
| C29_1 | C30_1 | 1.387(4) |
| C29_1 | C34_1 | 1.380(4) |
| C30_1 | C31_1 | 1.381(5) |
| C31_1 | C32_1 | 1.382(5) |
| C32_1 | C33_1 | 1.360(5) |
| C33_1 | C34_1 | 1.395(4) |
| C35_1 | C36_1 | 1.531(4) |
| C35_1 | C37_1 | 1.534(4) |
| C35_1 | C38_1 | 1.530(4) |
| O1_2  | C1_2  | 1.251(3) |
| O2_2  | C1_2  | 1.271(3) |
| O3_2  | C3_2  | 1.215(4) |
| O4_2  | C6_2  | 1.210(3) |
| N1_2  | C2_2  | 1.450(3) |
| N1_2  | C3_2  | 1.399(4) |
| N1_2  | C6_2  | 1.396(3) |
| C1_2  | C2_2  | 1.534(4) |
| C2_2  | C35_2 | 1.560(4) |
| C3_2  | C4_2  | 1.486(4) |
| C4_2  | C5_2  | 1.393(4) |
| C4_2  | C10_2 | 1.389(4) |
| C5_2  | C6_2  | 1.501(4) |
| C5_2  | C7_2  | 1.395(4) |
| C7_2  | C8_2  | 1.417(4) |
| C7_2  | C29_2 | 1.492(4) |
| C8_2  | C9_2  | 1.406(4) |
| C8_2  | C23_2 | 1.491(4) |
| C9_2  | C10_2 | 1.426(4) |
| C9_2  | C17_2 | 1.499(4) |
| C10_2 | C11_2 | 1.493(4) |
| C11_2 | C12_2 | 1.372(4) |
| C11_2 | C16_2 | 1.410(4) |
| C12_2 | C13_2 | 1.390(5) |
| C13_2 | C14_2 | 1.364(5) |
| C14_2 | C15_2 | 1.361(5) |
| C15_2 | C16_2 | 1.398(4) |
| C17_2 | C18_2 | 1.385(5) |
| C17_2 | C22_2 | 1.395(5) |
| C18_2 | C19_2 | 1.407(5) |
| C19_2 | C20_2 | 1.356(6) |
| C20_2 | C21_2 | 1.376(6) |
| C21_2 | C22_2 | 1.392(5) |
| C23_2 | C24_2 | 1.391(5) |
| C23_2 | C28_2 | 1.395(5) |
| C24_2 | C25_2 | 1.381(5) |
| C25_2 | C26_2 | 1.359(6) |
| C26_2 | C27_2 | 1.377(6) |
| C27_2 | C28_2 | 1.403(5) |
| C29_2 | C30_2 | 1.387(4) |
| C29_2 | C34_2 | 1.380(4) |
| C30_2 | C31_2 | 1.381(5) |
| C31_2 | C32_2 | 1.382(5) |
| C32_2 | C33_2 | 1.360(5) |
| C33_2 | C34_2 | 1.394(4) |
| C35_2 | C36_2 | 1.532(4) |
| C35_2 | C37_2 | 1.533(4) |
| C35_2 | C38_2 | 1.530(4) |
| O1_3  | C1_3  | 1.251(3) |
| O2_3  | C1_3  | 1.271(3) |
| O3_3  | C3_3  | 1.216(4) |
| O4_3  | C6_3  | 1.212(4) |
| N1_3  | C2_3  | 1.452(3) |

| Atom  | Atom  | Length/Å |
|-------|-------|----------|
| N1_3  | C3_3  | 1.400(4) |
| N1_3  | C6_3  | 1.397(3) |
| C1_3  | C2_3  | 1.534(4) |
| C2_3  | C35_3 | 1.561(4) |
| C3_3  | C4_3  | 1.486(4) |
| C4_3  | C5_3  | 1.393(4) |
| C4_3  | C10_3 | 1.390(4) |
| C5_3  | C6_3  | 1.502(4) |
| C5_3  | C7_3  | 1.394(4) |
| C7_3  | C8_3  | 1.420(4) |
| C7_3  | C29_3 | 1.494(4) |
| C8_3  | C9_3  | 1.406(4) |
| C8_3  | C23_3 | 1.492(4) |
| C9_3  | C10_3 | 1.427(4) |
| C9_3  | C17_3 | 1.500(4) |
| C10_3 | C11_3 | 1.492(4) |
| C11_3 | C12_3 | 1.371(4) |
| C11_3 | C16_3 | 1.410(4) |
| C12_3 | C13_3 | 1.391(5) |
| C13_3 | C14_3 | 1.364(5) |
| C14_3 | C15_3 | 1.361(5) |
| C15_3 | C16_3 | 1.398(4) |
| C17_3 | C18_3 | 1.386(5) |
| C17_3 | C22_3 | 1.395(5) |
| C18_3 | C19_3 | 1.408(5) |
| C19_3 | C20_3 | 1.356(6) |
| C20_3 | C21_3 | 1.376(6) |
| C21_3 | C22_3 | 1.392(5) |
| C23_3 | C24_3 | 1.392(4) |
| C23_3 | C28_3 | 1.396(5) |
| C24_3 | C25_3 | 1.380(5) |
| C25_3 | C26_3 | 1.359(6) |
| C26_3 | C27_3 | 1.377(6) |
| C27_3 | C28_3 | 1.402(5) |
| C29_3 | C30_3 | 1.387(4) |
| C29_3 | C34_3 | 1.380(4) |
| C30_3 | C31_3 | 1.380(5) |
| C31_3 | C32_3 | 1.382(5) |
| C32_3 | C33_3 | 1.361(5) |
| C33_3 | C34_3 | 1.395(4) |
| C35_3 | C36_3 | 1.532(4) |
| C35_3 | C37_3 | 1.534(4) |
| C35_3 | C38_3 | 1.530(4) |
| O1_4  | C1_4  | 1.251(3) |
| O2_4  | C1_4  | 1.271(3) |
| O3_4  | C3_4  | 1.217(4) |
| O4_4  | C6_4  | 1.213(4) |
| N1_4  | C2_4  | 1.453(3) |
| N1_4  | C3_4  | 1.399(4) |
| N1_4  | C6_4  | 1.398(3) |
| C1_4  | C2_4  | 1.537(4) |
| C2_4  | C35_4 | 1.561(4) |
| C3_4  | C4_4  | 1.488(4) |
| C4_4  | C5_4  | 1.394(4) |
| C4_4  | C10_4 | 1.389(4) |
| C5_4  | C6_4  | 1.501(4) |
| C5_4  | C7_4  | 1.395(4) |
| C7_4  | C8_4  | 1.418(4) |
| C7_4  | C29_4 | 1.492(4) |
| C8_4  | C9_4  | 1.406(4) |
| C8_4  | C23_4 | 1.491(4) |
| C9_4  | C10_4 | 1.428(4) |
| C9_4  | C17_4 | 1.500(4) |

| Atom  | Atom  | Length/Å | Atom   | Atom   | Length/Å |
|-------|-------|----------|--------|--------|----------|
| C10_4 | C11_4 | 1.493(4) | Cl2_6  | C1_6   | 1.759(9) |
| C11_4 | C12_4 | 1.372(4) | Cl3_8  | C39_8  | 1.733(5) |
| C11_4 | C16_4 | 1.411(4) | N2_8   | C39_8  | 1.315(5) |
| C12_4 | C13_4 | 1.391(5) | N2_8   | C43_8  | 1.363(6) |
| C13_4 | C14_4 | 1.364(5) | C39_8  | C40_8  | 1.364(6) |
| C14_4 | C15_4 | 1.362(5) | C40_8  | C41_8  | 1.381(7) |
| C15_4 | C16_4 | 1.398(4) | C41_8  | C42_8  | 1.366(7) |
| C17_4 | C18_4 | 1.385(5) | C42_8  | C43_8  | 1.409(6) |
| C17_4 | C22_4 | 1.396(5) | Cl3_9  | C39_9  | 1.735(5) |
| C18_4 | C19_4 | 1.408(5) | N2_9   | C39_9  | 1.316(5) |
| C19_4 | C20_4 | 1.356(6) | N2_9   | C43_9  | 1.364(6) |
| C20_4 | C21_4 | 1.376(6) | C39_9  | C40_9  | 1.364(6) |
| C21_4 | C22_4 | 1.391(5) | C40_9  | C41_9  | 1.381(7) |
| C23_4 | C24_4 | 1.391(5) | C41_9  | C42_9  | 1.366(7) |
| C23_4 | C28_4 | 1.396(5) | C42_9  | C43_9  | 1.409(6) |
| C24_4 | C25_4 | 1.381(5) | Cl3_10 | C39_10 | 1.733(5) |
| C25_4 | C26_4 | 1.359(6) | N2_10  | C39_10 | 1.315(6) |
| C26_4 | C27_4 | 1.377(6) | N2_10  | C43_10 | 1.364(6) |
| C27_4 | C28_4 | 1.402(5) | C39_10 | C40_10 | 1.364(6) |
| C29_4 | C30_4 | 1.387(4) | C40_10 | C41_10 | 1.382(7) |
| C29_4 | C34_4 | 1.379(4) | C41_10 | C42_10 | 1.367(7) |
| C30_4 | C31_4 | 1.381(5) | C42_10 | C43_10 | 1.410(7) |
| C31_4 | C32_4 | 1.381(5) | Cl3_13 | C39_13 | 1.733(5) |
| C32_4 | C33_4 | 1.361(5) | N2_13  | C39_13 | 1.315(6) |
| C33_4 | C34_4 | 1.395(4) | N2_13  | C43_13 | 1.363(6) |
| C35_4 | C36_4 | 1.531(4) | C39_13 | C40_13 | 1.364(6) |
| C35_4 | C37_4 | 1.535(4) | C40_13 | C41_13 | 1.382(7) |
| C35_4 | C38_4 | 1.529(4) | C41_13 | C42_13 | 1.366(7) |
| Cl1_6 | C1_6  | 1.757(8) | C42_13 | C43_13 | 1.410(6) |

Table 4: Bond Angles in ° for JCS-Pyridine-TPPTTL-CoXtal-xtal2.

| Atom  | Atom | Atom  | Angle/°    | Atom  | Atom | Atom  | Angle/°    |
|-------|------|-------|------------|-------|------|-------|------------|
| O1_1  | Rh1  | Rh2   | 89.47(7)   | O2_4  | Rh2  | Rh1   | 88.33(8)   |
| O1_1  | Rh1  | N2_10 | 85.2(4)    | O2_4  | Rh2  | O2_1  | 90.86(14)  |
| O1_1  | Rh1  | N2_13 | 84.5(2)    | O2_4  | Rh2  | O2_2  | 176.02(12) |
| O1_2  | Rh1  | Rh2   | 87.95(8)   | O2_4  | Rh2  | O2_3  | 91.33(14)  |
| O1_2  | Rh1  | O1_1  | 89.20(15)  | O2_4  | Rh2  | N2_8  | 86.85(13)  |
| O1_2  | Rh1  | O1_4  | 175.56(12) | N2_8  | Rh2  | Rh1   | 175.12(11) |
| O1_2  | Rh1  | N2_10 | 101.6(4)   | C1_1  | O1_1 | Rh1   | 116.7(2)   |
| O1_2  | Rh1  | N2_13 | 80.6(3)    | C1_1  | O2_1 | Rh2   | 119.8(2)   |
| O1_3  | Rh1  | Rh2   | 87.34(8)   | C3_1  | N1_1 | C2_1  | 122.5(3)   |
| O1_3  | Rh1  | O1_1  | 176.69(12) | C6_1  | N1_1 | C2_1  | 125.7(3)   |
| O1_3  | Rh1  | O1_2  | 89.78(15)  | C6_1  | N1_1 | C3_1  | 111.3(2)   |
| O1_3  | Rh1  | O1_4  | 89.54(14)  | O1_1  | C1_1 | O2_1  | 127.4(3)   |
| O1_3  | Rh1  | N2_10 | 98.1(4)    | O1_1  | C1_1 | C2_1  | 119.1(3)   |
| O1_3  | Rh1  | N2_13 | 98.5(2)    | O2_1  | C1_1 | C2_1  | 113.5(3)   |
| O1_4  | Rh1  | Rh2   | 87.64(8)   | N1_1  | C2_1 | C1_1  | 109.1(3)   |
| O1_4  | Rh1  | O1_1  | 91.24(14)  | N1_1  | C2_1 | C35_1 | 114.0(3)   |
| O1_4  | Rh1  | N2_10 | 82.8(4)    | C1_1  | C2_1 | C35_1 | 117.5(3)   |
| O1_4  | Rh1  | N2_13 | 103.8(3)   | O3_1  | C3_1 | N1_1  | 124.0(3)   |
| N2_10 | Rh1  | Rh2   | 168.9(2)   | O3_1  | C3_1 | C4_1  | 129.2(3)   |
| N2_13 | Rh1  | Rh2   | 167.11(18) | N1_1  | C3_1 | C4_1  | 106.7(2)   |
| O2_1  | Rh2  | Rh1   | 86.60(8)   | C5_1  | C4_1 | C3_1  | 107.6(3)   |
| O2_1  | Rh2  | O2_2  | 90.71(14)  | C10_1 | C4_1 | C3_1  | 130.0(3)   |
| O2_1  | Rh2  | O2_3  | 174.62(12) | C10_1 | C4_1 | C5_1  | 122.3(3)   |
| O2_1  | Rh2  | N2_8  | 92.69(13)  | C4_1  | C5_1 | C6_1  | 107.7(3)   |
| O2_2  | Rh2  | Rh1   | 88.11(8)   | C7_1  | C5_1 | C4_1  | 122.2(3)   |
| O2_2  | Rh2  | O2_3  | 86.80(14)  | C7_1  | C5_1 | C6_1  | 130.1(3)   |
| O2_2  | Rh2  | N2_8  | 96.73(13)  | O4_1  | C6_1 | N1_1  | 125.1(3)   |
| O2_3  | Rh2  | Rh1   | 88.55(8)   | O4_1  | C6_1 | C5_1  | 129.1(3)   |
| O2_3  | Rh2  | N2_8  | 92.33(13)  | N1_1  | C6_1 | C5_1  | 105.8(2)   |

| Atom  | Atom  | Atom  | Angle/°  |
|-------|-------|-------|----------|
| C5_1  | C7_1  | C8_1  | 116.2(3) |
| C5_1  | C7_1  | C29_1 | 123.1(3) |
| C8_1  | C7_1  | C29_1 | 120.7(3) |
| C7_1  | C8_1  | C23_1 | 119.1(3) |
| C9_1  | C8_1  | C7_1  | 121.9(3) |
| C9_1  | C8_1  | C23_1 | 118.9(3) |
| C8_1  | C9_1  | C10_1 | 120.5(3) |
| C8_1  | C9_1  | C17_1 | 120.0(3) |
| C10_1 | C9_1  | C17_1 | 119.3(3) |
| C4_1  | C10_1 | C9_1  | 116.7(3) |
| C4_1  | C10_1 | C11_1 | 122.3(3) |
| C9_1  | C10_1 | C11_1 | 120.9(3) |
| C12_1 | C11_1 | C10_1 | 121.8(3) |
| C12_1 | C11_1 | C16_1 | 119.1(3) |
| C16_1 | C11_1 | C10_1 | 119.0(3) |
| C11_1 | C12_1 | C13_1 | 120.3(4) |
| C14_1 | C13_1 | C12_1 | 120.8(4) |
| C15_1 | C14_1 | C13_1 | 119.9(4) |
| C14_1 | C15_1 | C16_1 | 120.8(4) |
| C15_1 | C16_1 | C11_1 | 119.0(3) |
| C18_1 | C17_1 | C9_1  | 121.1(4) |
| C18_1 | C17_1 | C22_1 | 118.8(4) |
| C22_1 | C17_1 | C9_1  | 120.1(4) |
| C17_1 | C18_1 | C19_1 | 120.5(4) |
| C20_1 | C19_1 | C18_1 | 119.4(5) |
| C19_1 | C20_1 | C21_1 | 121.2(4) |
| C20_1 | C21_1 | C22_1 | 119.9(5) |
| C21_1 | C22_1 | C17_1 | 120.0(4) |
| C24_1 | C23_1 | C8_1  | 121.4(3) |
| C24_1 | C23_1 | C28_1 | 118.9(3) |
| C28_1 | C23_1 | C8_1  | 119.7(3) |
| C25_1 | C24_1 | C23_1 | 120.6(4) |
| C26_1 | C25_1 | C24_1 | 120.7(4) |
| C25_1 | C26_1 | C27_1 | 119.9(4) |
| C26_1 | C27_1 | C28_1 | 120.8(4) |
| C23_1 | C28_1 | C27_1 | 119.1(4) |
| C30_1 | C29_1 | C7_1  | 119.9(3) |
| C34_1 | C29_1 | C7_1  | 121.1(3) |
| C34_1 | C29_1 | C30_1 | 118.6(3) |
| C31_1 | C30_1 | C29_1 | 121.4(4) |
| C30_1 | C31_1 | C32_1 | 118.5(4) |
| C33_1 | C32_1 | C31_1 | 121.7(4) |
| C32_1 | C33_1 | C34_1 | 119.2(4) |
| C29_1 | C34_1 | C33_1 | 120.6(4) |
| C36_1 | C35_1 | C2_1  | 108.7(3) |
| C36_1 | C35_1 | C37_1 | 108.0(3) |
| C36_1 | C35_1 | C38_1 | 111.1(3) |
| C37_1 | C35_1 | C2_1  | 106.8(3) |
| C38_1 | C35_1 | C2_1  | 113.3(3) |
| C38_1 | C35_1 | C37_1 | 108.7(3) |
| C1_2  | O1_2  | Rh1   | 118.8(2) |
| C1_2  | O2_2  | Rh2   | 117.6(2) |
| C3_2  | N1_2  | C2_2  | 122.2(3) |
| C6_2  | N1_2  | C2_2  | 126.7(3) |
| C6_2  | N1_2  | C3_2  | 111.0(2) |
| O1_2  | C1_2  | O2_2  | 127.4(3) |
| O1_2  | C1_2  | C2_2  | 118.1(3) |
| O2_2  | C1_2  | C2_2  | 114.3(3) |
| N1_2  | C2_2  | C1_2  | 109.6(3) |
| N1_2  | C2_2  | C35_2 | 114.3(3) |
| C1_2  | C2_2  | C35_2 | 117.6(3) |
| O3_2  | C3_2  | N1_2  | 123.6(3) |
| O3_2  | C3_2  | C4_2  | 129.5(3) |

| Atom  | Atom  | Atom  | Angle/°  |
|-------|-------|-------|----------|
| N1_2  | C3_2  | C4_2  | 106.9(2) |
| C5_2  | C4_2  | C3_2  | 107.5(3) |
| C10_2 | C4_2  | C3_2  | 130.2(3) |
| C10_2 | C4_2  | C5_2  | 122.2(3) |
| C4_2  | C5_2  | C6_2  | 107.6(2) |
| C4_2  | C5_2  | C7_2  | 122.4(3) |
| C7_2  | C5_2  | C6_2  | 129.9(3) |
| O4_2  | C6_2  | N1_2  | 124.8(3) |
| O4_2  | C6_2  | C5_2  | 129.3(3) |
| N1_2  | C6_2  | C5_2  | 105.9(2) |
| C5_2  | C7_2  | C8_2  | 116.2(3) |
| C5_2  | C7_2  | C29_2 | 122.1(3) |
| C8_2  | C7_2  | C29_2 | 121.6(3) |
| C7_2  | C8_2  | C23_2 | 119.2(3) |
| C9_2  | C8_2  | C7_2  | 121.7(3) |
| C9_2  | C8_2  | C23_2 | 119.1(3) |
| C8_2  | C9_2  | C10_2 | 120.9(3) |
| C8_2  | C9_2  | C17_2 | 120.1(3) |
| C10_2 | C9_2  | C17_2 | 119.0(3) |
| C4_2  | C10_2 | C9_2  | 116.6(3) |
| C4_2  | C10_2 | C11_2 | 122.3(3) |
| C9_2  | C10_2 | C11_2 | 121.1(3) |
| C12_2 | C11_2 | C10_2 | 121.7(3) |
| C12_2 | C11_2 | C16_2 | 119.1(3) |
| C16_2 | C11_2 | C10_2 | 119.1(3) |
| C11_2 | C12_2 | C13_2 | 120.3(4) |
| C14_2 | C13_2 | C12_2 | 120.8(4) |
| C15_2 | C14_2 | C13_2 | 119.9(4) |
| C14_2 | C15_2 | C16_2 | 120.9(4) |
| C15_2 | C16_2 | C11_2 | 119.0(3) |
| C18_2 | C17_2 | C9_2  | 120.9(3) |
| C18_2 | C17_2 | C22_2 | 118.8(3) |
| C22_2 | C17_2 | C9_2  | 120.2(3) |
| C17_2 | C18_2 | C19_2 | 120.5(4) |
| C20_2 | C19_2 | C18_2 | 119.4(4) |
| C19_2 | C20_2 | C21_2 | 121.1(4) |
| C20_2 | C21_2 | C22_2 | 119.9(4) |
| C21_2 | C22_2 | C17_2 | 120.0(4) |
| C24_2 | C23_2 | C8_2  | 121.4(3) |
| C24_2 | C23_2 | C28_2 | 118.6(3) |
| C28_2 | C23_2 | C8_2  | 119.8(3) |
| C25_2 | C24_2 | C23_2 | 121.0(4) |
| C26_2 | C25_2 | C24_2 | 120.6(4) |
| C25_2 | C26_2 | C27_2 | 119.7(4) |
| C26_2 | C27_2 | C28_2 | 120.9(4) |
| C23_2 | C28_2 | C27_2 | 119.1(4) |
| C30_2 | C29_2 | C7_2  | 119.9(3) |
| C34_2 | C29_2 | C7_2  | 121.4(3) |
| C34_2 | C29_2 | C30_2 | 118.7(3) |
| C31_2 | C30_2 | C29_2 | 121.2(3) |
| C30_2 | C31_2 | C32_2 | 118.6(4) |
| C33_2 | C32_2 | C31_2 | 121.7(3) |
| C32_2 | C33_2 | C34_2 | 119.1(4) |
| C29_2 | C34_2 | C33_2 | 120.7(3) |
| C36_2 | C35_2 | C2_2  | 108.6(3) |
| C36_2 | C35_2 | C37_2 | 108.1(3) |
| C37_2 | C35_2 | C2_2  | 107.1(3) |
| C38_2 | C35_2 | C2_2  | 113.4(3) |
| C38_2 | C35_2 | C36_2 | 110.8(3) |
| C38_2 | C35_2 | C37_2 | 108.7(3) |
| C1_3  | O1_3  | Rh1   | 120.4(2) |
| C1_3  | O2_3  | Rh2   | 116.5(2) |
| C3_3  | N1_3  | C2_3  | 121.6(3) |

| Atom  | Atom  | Atom  | Angle/°  |
|-------|-------|-------|----------|
| C6_3  | N1_3  | C2_3  | 127.4(3) |
| C6_3  | N1_3  | C3_3  | 111.0(2) |
| O1_3  | C1_3  | O2_3  | 126.7(3) |
| O1_3  | C1_3  | C2_3  | 118.1(3) |
| O2_3  | C1_3  | C2_3  | 114.9(3) |
| N1_3  | C2_3  | C1_3  | 110.2(3) |
| N1_3  | C2_3  | C35_3 | 114.0(3) |
| C1_3  | C2_3  | C35_3 | 117.1(3) |
| O3_3  | C3_3  | N1_3  | 124.1(3) |
| O3_3  | C3_3  | C4_3  | 129.0(3) |
| N1_3  | C3_3  | C4_3  | 106.8(2) |
| C5_3  | C4_3  | C3_3  | 107.9(3) |
| C10_3 | C4_3  | C3_3  | 129.4(3) |
| C10_3 | C4_3  | C5_3  | 122.6(3) |
| C4_3  | C5_3  | C6_3  | 107.6(2) |
| C4_3  | C5_3  | C7_3  | 121.8(3) |
| C7_3  | C5_3  | C6_3  | 130.4(3) |
| O4_3  | C6_3  | N1_3  | 124.6(3) |
| O4_3  | C6_3  | C5_3  | 129.0(3) |
| N1_3  | C6_3  | C5_3  | 106.4(2) |
| C5_3  | C7_3  | C8_3  | 116.6(3) |
| C5_3  | C7_3  | C29_3 | 122.7(3) |
| C8_3  | C7_3  | C29_3 | 120.7(3) |
| C7_3  | C8_3  | C23_3 | 119.0(3) |
| C9_3  | C8_3  | C7_3  | 121.8(3) |
| C9_3  | C8_3  | C23_3 | 119.2(3) |
| C8_3  | C9_3  | C10_3 | 120.4(3) |
| C8_3  | C9_3  | C17_3 | 120.7(3) |
| C10_3 | C9_3  | C17_3 | 118.5(3) |
| C4_3  | C10_3 | C9_3  | 116.8(3) |
| C4_3  | C10_3 | C11_3 | 121.8(3) |
| C9_3  | C10_3 | C11_3 | 121.3(3) |
| C12_3 | C11_3 | C10_3 | 121.8(3) |
| C12_3 | C11_3 | C16_3 | 118.9(3) |
| C16_3 | C11_3 | C10_3 | 119.1(3) |
| C11_3 | C12_3 | C13_3 | 120.2(4) |
| C14_3 | C13_3 | C12_3 | 121.0(4) |
| C15_3 | C14_3 | C13_3 | 119.8(4) |
| C14_3 | C15_3 | C16_3 | 120.8(4) |
| C15_3 | C16_3 | C11_3 | 119.2(3) |
| C18_3 | C17_3 | C9_3  | 120.9(3) |
| C18_3 | C17_3 | C22_3 | 118.9(3) |
| C22_3 | C17_3 | C9_3  | 120.2(3) |
| C17_3 | C18_3 | C19_3 | 120.5(4) |
| C20_3 | C19_3 | C18_3 | 119.4(4) |
| C19_3 | C20_3 | C21_3 | 121.2(4) |
| C20_3 | C21_3 | C22_3 | 120.0(4) |
| C21_3 | C22_3 | C17_3 | 120.0(4) |
| C24_3 | C23_3 | C8_3  | 121.8(3) |
| C24_3 | C23_3 | C28_3 | 118.5(3) |
| C28_3 | C23_3 | C8_3  | 119.4(3) |
| C25_3 | C24_3 | C23_3 | 120.8(4) |
| C26_3 | C25_3 | C24_3 | 120.8(4) |
| C25_3 | C26_3 | C27_3 | 119.6(4) |
| C26_3 | C27_3 | C28_3 | 120.9(4) |
| C23_3 | C28_3 | C27_3 | 119.3(4) |
| C30_3 | C29_3 | C7_3  | 119.5(3) |
| C34_3 | C29_3 | C7_3  | 121.1(3) |
| C34_3 | C29_3 | C30_3 | 118.5(3) |
| C31_3 | C30_3 | C29_3 | 121.2(3) |
| C30_3 | C31_3 | C32_3 | 118.6(3) |
| C33_3 | C32_3 | C31_3 | 121.6(3) |
| C32_3 | C33_3 | C34_3 | 119.0(3) |

| Atom  | Atom  | Atom  | Angle/°  |
|-------|-------|-------|----------|
| C29_3 | C34_3 | C33_3 | 120.9(3) |
| C36_3 | C35_3 | C2_3  | 109.3(3) |
| C36_3 | C35_3 | C37_3 | 107.6(3) |
| C36_3 | C35_3 | C38_3 | 110.9(3) |
| C37_3 | C35_3 | C2_3  | 107.3(3) |
| C38_3 | C35_3 | C2_3  | 112.6(3) |
| C38_3 | C35_3 | C37_3 | 108.9(3) |
| C1_4  | O1_4  | Rh1   | 118.8(2) |
| C1_4  | O2_4  | Rh2   | 118.1(2) |
| C3_4  | N1_4  | C2_4  | 123.4(3) |
| C6_4  | N1_4  | C2_4  | 125.2(3) |
| C6_4  | N1_4  | C3_4  | 111.3(2) |
| O1_4  | C1_4  | O2_4  | 126.9(3) |
| O1_4  | C1_4  | C2_4  | 118.7(3) |
| O2_4  | C1_4  | C2_4  | 114.2(3) |
| N1_4  | C2_4  | C1_4  | 109.0(3) |
| N1_4  | C2_4  | C35_4 | 113.5(3) |
| C1_4  | C2_4  | C35_4 | 116.8(3) |
| O3_4  | C3_4  | N1_4  | 124.1(3) |
| O3_4  | C3_4  | C4_4  | 129.1(3) |
| N1_4  | C3_4  | C4_4  | 106.8(2) |
| C5_4  | C4_4  | C3_4  | 107.6(2) |
| C10_4 | C4_4  | C3_4  | 130.6(3) |
| C10_4 | C4_4  | C5_4  | 121.7(3) |
| C4_4  | C5_4  | C6_4  | 108.1(2) |
| C4_4  | C5_4  | C7_4  | 122.8(3) |
| C7_4  | C5_4  | C6_4  | 129.1(3) |
| O4_4  | C6_4  | N1_4  | 124.5(3) |
| O4_4  | C6_4  | C5_4  | 129.4(3) |
| N1_4  | C6_4  | C5_4  | 105.9(2) |
| C5_4  | C7_4  | C8_4  | 116.2(3) |
| C5_4  | C7_4  | C29_4 | 122.1(3) |
| C8_4  | C7_4  | C29_4 | 121.4(3) |
| C7_4  | C8_4  | C23_4 | 119.5(3) |
| C9_4  | C8_4  | C7_4  | 121.5(3) |
| C9_4  | C8_4  | C23_4 | 118.8(3) |
| C8_4  | C9_4  | C10_4 | 120.9(3) |
| C8_4  | C9_4  | C17_4 | 120.0(3) |
| C10_4 | C9_4  | C17_4 | 118.9(3) |
| C4_4  | C10_4 | C9_4  | 116.9(3) |
| C4_4  | C10_4 | C11_4 | 123.4(3) |
| C9_4  | C10_4 | C11_4 | 119.8(3) |
| C12_4 | C11_4 | C10_4 | 122.2(3) |
| C12_4 | C11_4 | C16_4 | 119.2(3) |
| C16_4 | C11_4 | C10_4 | 118.3(3) |
| C11_4 | C12_4 | C13_4 | 120.1(4) |
| C14_4 | C13_4 | C12_4 | 120.8(4) |
| C15_4 | C14_4 | C13_4 | 120.1(4) |
| C14_4 | C15_4 | C16_4 | 120.6(4) |
| C15_4 | C16_4 | C11_4 | 119.2(3) |
| C18_4 | C17_4 | C9_4  | 121.7(3) |
| C18_4 | C17_4 | C22_4 | 118.8(3) |
| C22_4 | C17_4 | C9_4  | 119.5(3) |
| C17_4 | C18_4 | C19_4 | 120.5(4) |
| C20_4 | C19_4 | C18_4 | 119.5(4) |
| C19_4 | C20_4 | C21_4 | 121.1(4) |
| C20_4 | C21_4 | C22_4 | 120.0(4) |
| C21_4 | C22_4 | C17_4 | 120.1(4) |
| C24_4 | C23_4 | C8_4  | 121.7(3) |
| C24_4 | C23_4 | C28_4 | 118.6(3) |
| C28_4 | C23_4 | C8_4  | 119.6(3) |
| C25_4 | C24_4 | C23_4 | 121.0(4) |
| C26_4 | C25_4 | C24_4 | 120.5(4) |

| Atom  | Atom  | Atom  | Angle/°  | Atom   | Atom   | Atom   | Angle/°  |
|-------|-------|-------|----------|--------|--------|--------|----------|
| C25_4 | C26_4 | C27_4 | 119.6(4) | C39_9  | N2_9   | C43_9  | 115.3(4) |
| C26_4 | C27_4 | C28_4 | 121.1(4) | N2_9   | C39_9  | Cl3_9  | 115.3(4) |
| C23_4 | C28_4 | C27_4 | 119.0(4) | N2_9   | C39_9  | C40_9  | 127.5(5) |
| C30_4 | C29_4 | C7_4  | 120.1(3) | C40_9  | C39_9  | Cl3_9  | 117.2(4) |
| C34_4 | C29_4 | C7_4  | 121.5(3) | C39_9  | C40_9  | C41_9  | 115.9(5) |
| C34_4 | C29_4 | C30_4 | 118.4(3) | C42_9  | C41_9  | C40_9  | 121.2(5) |
| C31_4 | C30_4 | C29_4 | 121.3(3) | C41_9  | C42_9  | C43_9  | 117.6(5) |
| C30_4 | C31_4 | C32_4 | 118.7(4) | N2_9   | C43_9  | C42_9  | 122.5(5) |
| C33_4 | C32_4 | C31_4 | 121.5(3) | C39_10 | N2_10  | Rh1    | 135.6(5) |
| C32_4 | C33_4 | C34_4 | 119.1(4) | C39_10 | N2_10  | C43_10 | 115.3(5) |
| C29_4 | C34_4 | C33_4 | 120.9(3) | C43_10 | N2_10  | Rh1    | 109.2(4) |
| C36_4 | C35_4 | C2_4  | 108.9(3) | N2_10  | C39_10 | Cl3_10 | 114.9(4) |
| C36_4 | C35_4 | C37_4 | 107.8(3) | N2_10  | C39_10 | C40_10 | 127.5(5) |
| C37_4 | C35_4 | C2_4  | 106.9(3) | C40_10 | C39_10 | Cl3_10 | 117.6(4) |
| C38_4 | C35_4 | C2_4  | 113.1(3) | C39_10 | C40_10 | C41_10 | 115.7(5) |
| C38_4 | C35_4 | C36_4 | 111.2(3) | C42_10 | C41_10 | C40_10 | 121.2(6) |
| C38_4 | C35_4 | C37_4 | 108.7(3) | C41_10 | C42_10 | C43_10 | 117.2(5) |
| Cl1_6 | C1_6  | Cl2_6 | 110.0(5) | N2_10  | C43_10 | C42_10 | 122.7(5) |
| C39_8 | N2_8  | Rh2   | 132.1(3) | C39_13 | N2_13  | Rh1    | 130.7(4) |
| C39_8 | N2_8  | C43_8 | 115.3(4) | C39_13 | N2_13  | C43_13 | 115.4(4) |
| C43_8 | N2_8  | Rh2   | 111.5(3) | C43_13 | N2_13  | Rh1    | 112.8(4) |
| N2_8  | C39_8 | Cl3_8 | 115.5(3) | N2_13  | C39_13 | Cl3_13 | 114.9(4) |
| N2_8  | C39_8 | C40_8 | 127.2(5) | N2_13  | C39_13 | C40_13 | 127.3(5) |
| C40_8 | C39_8 | Cl3_8 | 117.2(4) | C40_13 | C39_13 | Cl3_13 | 117.7(4) |
| C39_8 | C40_8 | C41_8 | 116.1(5) | C39_13 | C40_13 | C41_13 | 115.6(5) |
| C42_8 | C41_8 | C40_8 | 121.2(5) | C42_13 | C41_13 | C40_13 | 121.2(6) |
| C41_8 | C42_8 | C43_8 | 117.2(5) | C41_13 | C42_13 | C43_13 | 117.1(5) |
| N2_8  | C43_8 | C42_8 | 122.8(4) | N2_13  | C43_13 | C42_13 | 122.7(5) |

Table 5: Torsion Angles in ° for JCS-Pyridine-TPPTTL-CoXtal-xtal2.

| Atom | Atom  | Atom   | Atom   | Angle/°    |
|------|-------|--------|--------|------------|
| Rh1  | O1_1  | C1_1   | O2_1   | 1.3(6)     |
| Rh1  | O1_1  | C1_1   | C2_1   | -179.4(3)  |
| Rh1  | O1_2  | C1_2   | O2_2   | 2.2(7)     |
| Rh1  | O1_2  | C1_2   | C2_2   | 176.8(3)   |
| Rh1  | O1_3  | C1_3   | O2_3   | -8.9(6)    |
| Rh1  | O1_3  | C1_3   | C2_3   | 164.1(3)   |
| Rh1  | O1_4  | C1_4   | O2_4   | -4.6(6)    |
| Rh1  | O1_4  | C1_4   | C2_4   | 170.1(3)   |
| Rh1  | N2_10 | C39_10 | Cl3_10 | -2(3)      |
| Rh1  | N2_10 | C39_10 | C40_10 | 178.6(18)  |
| Rh1  | N2_10 | C43_10 | C42_10 | -180(2)    |
| Rh1  | N2_13 | C39_13 | Cl3_13 | -13.8(19)  |
| Rh1  | N2_13 | C39_13 | C40_13 | 170.5(16)  |
| Rh1  | N2_13 | C43_13 | C42_13 | -171.1(13) |
| Rh2  | O2_1  | C1_1   | O1_1   | 0.1(6)     |
| Rh2  | O2_1  | C1_1   | C2_1   | -179.3(2)  |
| Rh2  | O2_2  | C1_2   | O1_2   | 1.2(7)     |
| Rh2  | O2_2  | C1_2   | C2_2   | -173.7(2)  |
| Rh2  | O2_3  | C1_3   | O1_3   | 8.3(6)     |
| Rh2  | O2_3  | C1_3   | C2_3   | -165.0(2)  |
| Rh2  | O2_4  | C1_4   | O1_4   | 6.4(6)     |
| Rh2  | O2_4  | C1_4   | C2_4   | -168.6(2)  |
| Rh2  | N2_8  | C39_8  | Cl3_8  | 15.8(7)    |
| Rh2  | N2_8  | C39_8  | C40_8  | -165.1(5)  |
| Rh2  | N2_8  | C43_8  | C42_8  | 166.4(4)   |
| O1_1 | C1_1  | C2_1   | N1_1   | 126.1(4)   |
| O1_1 | C1_1  | C2_1   | C35_1  | -5.7(5)    |
| O2_1 | C1_1  | C2_1   | N1_1   | -54.5(5)   |
| O2_1 | C1_1  | C2_1   | C35_1  | 173.7(3)   |
| O3_1 | C3_1  | C4_1   | C5_1   | 174.6(6)   |

| Atom  | Atom  | Atom  | Atom  | Angle/°   |
|-------|-------|-------|-------|-----------|
| O3_1  | C3_1  | C4_1  | C10_1 | -2.0(10)  |
| N1_1  | C2_1  | C35_1 | C36_1 | 172.2(3)  |
| N1_1  | C2_1  | C35_1 | C37_1 | 55.9(4)   |
| N1_1  | C2_1  | C35_1 | C38_1 | -63.8(4)  |
| N1_1  | C3_1  | C4_1  | C5_1  | -3.2(6)   |
| N1_1  | C3_1  | C4_1  | C10_1 | -179.7(6) |
| C1_1  | C2_1  | C35_1 | C36_1 | -58.3(4)  |
| C1_1  | C2_1  | C35_1 | C37_1 | -174.6(4) |
| C1_1  | C2_1  | C35_1 | C38_1 | 65.7(4)   |
| C2_1  | N1_1  | C3_1  | O3_1  | 6.9(8)    |
| C2_1  | N1_1  | C3_1  | C4_1  | -175.2(4) |
| C2_1  | N1_1  | C6_1  | O4_1  | 1.3(9)    |
| C2_1  | N1_1  | C6_1  | C5_1  | 179.5(4)  |
| C3_1  | N1_1  | C2_1  | C1_1  | 121.3(4)  |
| C3_1  | N1_1  | C2_1  | C35_1 | -105.0(5) |
| C3_1  | N1_1  | C6_1  | O4_1  | -170.3(6) |
| C3_1  | N1_1  | C6_1  | C5_1  | 7.9(6)    |
| C3_1  | C4_1  | C5_1  | C6_1  | 7.8(6)    |
| C3_1  | C4_1  | C5_1  | C7_1  | -171.3(5) |
| C3_1  | C4_1  | C10_1 | C9_1  | 172.5(6)  |
| C3_1  | C4_1  | C10_1 | C11_1 | -5.8(9)   |
| C4_1  | C5_1  | C6_1  | O4_1  | 168.4(6)  |
| C4_1  | C5_1  | C6_1  | N1_1  | -9.7(6)   |
| C4_1  | C5_1  | C7_1  | C8_1  | -4.4(9)   |
| C4_1  | C5_1  | C7_1  | C29_1 | 175.7(5)  |
| C4_1  | C10_1 | C11_1 | C12_1 | 123.1(6)  |
| C4_1  | C10_1 | C11_1 | C16_1 | -59.0(8)  |
| C5_1  | C4_1  | C10_1 | C9_1  | -3.6(9)   |
| C5_1  | C4_1  | C10_1 | C11_1 | 178.1(5)  |
| C5_1  | C7_1  | C8_1  | C9_1  | 1.8(9)    |
| C5_1  | C7_1  | C8_1  | C23_1 | 177.7(5)  |
| C5_1  | C7_1  | C29_1 | C30_1 | -60.8(8)  |
| C5_1  | C7_1  | C29_1 | C34_1 | 126.1(6)  |
| C6_1  | N1_1  | C2_1  | C1_1  | -49.4(5)  |
| C6_1  | N1_1  | C2_1  | C35_1 | 84.2(5)   |
| C6_1  | N1_1  | C3_1  | O3_1  | 178.9(5)  |
| C6_1  | N1_1  | C3_1  | C4_1  | -3.2(6)   |
| C6_1  | C5_1  | C7_1  | C8_1  | 176.7(6)  |
| C6_1  | C5_1  | C7_1  | C29_1 | -3.2(10)  |
| C7_1  | C5_1  | C6_1  | O4_1  | -12.6(11) |
| C7_1  | C5_1  | C6_1  | N1_1  | 169.3(6)  |
| C7_1  | C8_1  | C9_1  | C10_1 | -0.2(9)   |
| C7_1  | C8_1  | C9_1  | C17_1 | -175.1(5) |
| C7_1  | C8_1  | C23_1 | C24_1 | -65.7(7)  |
| C7_1  | C8_1  | C23_1 | C28_1 | 116.5(6)  |
| C7_1  | C29_1 | C30_1 | C31_1 | -173.2(6) |
| C7_1  | C29_1 | C34_1 | C33_1 | 173.3(5)  |
| C8_1  | C7_1  | C29_1 | C30_1 | 119.4(6)  |
| C8_1  | C7_1  | C29_1 | C34_1 | -53.7(7)  |
| C8_1  | C9_1  | C10_1 | C4_1  | 1.0(9)    |
| C8_1  | C9_1  | C10_1 | C11_1 | 179.3(5)  |
| C8_1  | C9_1  | C17_1 | C18_1 | 109.4(8)  |
| C8_1  | C9_1  | C17_1 | C22_1 | -69.8(9)  |
| C8_1  | C23_1 | C24_1 | C25_1 | -177.4(5) |
| C8_1  | C23_1 | C28_1 | C27_1 | 177.0(5)  |
| C9_1  | C8_1  | C23_1 | C24_1 | 110.4(6)  |
| C9_1  | C8_1  | C23_1 | C28_1 | -67.4(7)  |
| C9_1  | C10_1 | C11_1 | C12_1 | -55.1(8)  |
| C9_1  | C10_1 | C11_1 | C16_1 | 122.8(6)  |
| C9_1  | C17_1 | C18_1 | C19_1 | -177.9(9) |
| C9_1  | C17_1 | C22_1 | C21_1 | -178.4(8) |
| C10_1 | C4_1  | C5_1  | C6_1  | -175.3(5) |
| C10_1 | C4_1  | C5_1  | C7_1  | 5.6(9)    |

| Atom  | Atom  | Atom  | Atom  | Angle/°   |
|-------|-------|-------|-------|-----------|
| C10_1 | C9_1  | C17_1 | C18_1 | -65.5(9)  |
| C10_1 | C9_1  | C17_1 | C22_1 | 115.2(8)  |
| C10_1 | C11_1 | C12_1 | C13_1 | 179.8(6)  |
| C10_1 | C11_1 | C16_1 | C15_1 | -178.7(6) |
| C11_1 | C12_1 | C13_1 | C14_1 | -1.5(11)  |
| C12_1 | C11_1 | C16_1 | C15_1 | -0.7(9)   |
| C12_1 | C13_1 | C14_1 | C15_1 | -0.1(12)  |
| C13_1 | C14_1 | C15_1 | C16_1 | 1.3(12)   |
| C14_1 | C15_1 | C16_1 | C11_1 | -0.9(11)  |
| C16_1 | C11_1 | C12_1 | C13_1 | 1.9(9)    |
| C17_1 | C9_1  | C10_1 | C4_1  | 176.0(5)  |
| C17_1 | C9_1  | C10_1 | C11_1 | -5.7(8)   |
| C17_1 | C18_1 | C19_1 | C20_1 | -2(2)     |
| C18_1 | C17_1 | C22_1 | C21_1 | 2.3(14)   |
| C18_1 | C19_1 | C20_1 | C21_1 | 0(2)      |
| C19_1 | C20_1 | C21_1 | C22_1 | 4(2)      |
| C20_1 | C21_1 | C22_1 | C17_1 | -5.0(18)  |
| C22_1 | C17_1 | C18_1 | C19_1 | 1.4(15)   |
| C23_1 | C8_1  | C9_1  | C10_1 | -176.1(5) |
| C23_1 | C8_1  | C9_1  | C17_1 | 9.0(8)    |
| C23_1 | C24_1 | C25_1 | C26_1 | 0.8(10)   |
| C24_1 | C23_1 | C28_1 | C27_1 | -0.8(9)   |
| C24_1 | C25_1 | C26_1 | C27_1 | -1.6(10)  |
| C25_1 | C26_1 | C27_1 | C28_1 | 1.2(10)   |
| C26_1 | C27_1 | C28_1 | C23_1 | 0.0(10)   |
| C28_1 | C23_1 | C24_1 | C25_1 | 0.4(9)    |
| C29_1 | C7_1  | C8_1  | C9_1  | -178.4(5) |
| C29_1 | C7_1  | C8_1  | C23_1 | -2.4(8)   |
| C29_1 | C30_1 | C31_1 | C32_1 | 0.5(11)   |
| C30_1 | C29_1 | C34_1 | C33_1 | 0.0(8)    |
| C30_1 | C31_1 | C32_1 | C33_1 | -1.4(11)  |
| C31_1 | C32_1 | C33_1 | C34_1 | 1.6(11)   |
| C32_1 | C33_1 | C34_1 | C29_1 | -0.9(9)   |
| C34_1 | C29_1 | C30_1 | C31_1 | 0.1(9)    |
| O1_2  | C1_2  | C2_2  | N1_2  | 143.2(4)  |
| O1_2  | C1_2  | C2_2  | C35_2 | 10.5(5)   |
| O2_2  | C1_2  | C2_2  | N1_2  | -41.4(5)  |
| O2_2  | C1_2  | C2_2  | C35_2 | -174.1(3) |
| O3_2  | C3_2  | C4_2  | C5_2  | 178.0(5)  |
| O3_2  | C3_2  | C4_2  | C10_2 | -0.1(9)   |
| N1_2  | C2_2  | C35_2 | C36_2 | 158.1(3)  |
| N1_2  | C2_2  | C35_2 | C37_2 | 41.6(4)   |
| N1_2  | C2_2  | C35_2 | C38_2 | -78.3(4)  |
| N1_2  | C3_2  | C4_2  | C5_2  | -3.2(5)   |
| N1_2  | C3_2  | C4_2  | C10_2 | 178.7(5)  |
| C1_2  | C2_2  | C35_2 | C36_2 | -71.4(4)  |
| C1_2  | C2_2  | C35_2 | C37_2 | 172.1(3)  |
| C1_2  | C2_2  | C35_2 | C38_2 | 52.2(4)   |
| C2_2  | N1_2  | C3_2  | O3_2  | -2.4(7)   |
| C2_2  | N1_2  | C3_2  | C4_2  | 178.7(3)  |
| C2_2  | N1_2  | C6_2  | O4_2  | 6.1(7)    |
| C2_2  | N1_2  | C6_2  | C5_2  | -173.9(4) |
| C3_2  | N1_2  | C2_2  | C1_2  | 117.2(4)  |
| C3_2  | N1_2  | C2_2  | C35_2 | -108.5(4) |
| C3_2  | N1_2  | C6_2  | O4_2  | -171.3(5) |
| C3_2  | N1_2  | C6_2  | C5_2  | 8.6(5)    |
| C3_2  | C4_2  | C5_2  | C6_2  | 8.3(5)    |
| C3_2  | C4_2  | C5_2  | C7_2  | -175.3(5) |
| C3_2  | C4_2  | C10_2 | C9_2  | 177.3(5)  |
| C3_2  | C4_2  | C10_2 | C11_2 | 0.1(7)    |
| C4_2  | C5_2  | C6_2  | O4_2  | 169.5(5)  |
| C4_2  | C5_2  | C6_2  | N1_2  | -10.5(5)  |
| C4_2  | C5_2  | C7_2  | C8_2  | -3.5(7)   |

| Atom  | Atom  | Atom  | Atom  | Angle/°   |
|-------|-------|-------|-------|-----------|
| C4_2  | C5_2  | C7_2  | C29_2 | 172.4(4)  |
| C4_2  | C10_2 | C11_2 | C12_2 | 116.6(5)  |
| C4_2  | C10_2 | C11_2 | C16_2 | -59.9(6)  |
| C5_2  | C4_2  | C10_2 | C9_2  | -0.5(7)   |
| C5_2  | C4_2  | C10_2 | C11_2 | -177.7(4) |
| C5_2  | C7_2  | C8_2  | C9_2  | 1.8(7)    |
| C5_2  | C7_2  | C8_2  | C23_2 | 179.4(4)  |
| C5_2  | C7_2  | C29_2 | C30_2 | -61.0(7)  |
| C5_2  | C7_2  | C29_2 | C34_2 | 120.1(5)  |
| C6_2  | N1_2  | C2_2  | C1_2  | -60.0(5)  |
| C6_2  | N1_2  | C2_2  | C35_2 | 74.3(5)   |
| C6_2  | N1_2  | C3_2  | O3_2  | 175.2(5)  |
| C6_2  | N1_2  | C3_2  | C4_2  | -3.7(5)   |
| C6_2  | C5_2  | C7_2  | C8_2  | 172.0(5)  |
| C6_2  | C5_2  | C7_2  | C29_2 | -12.1(8)  |
| C7_2  | C5_2  | C6_2  | O4_2  | -6.6(9)   |
| C7_2  | C5_2  | C6_2  | N1_2  | 173.4(5)  |
| C7_2  | C8_2  | C9_2  | C10_2 | 0.6(7)    |
| C7_2  | C8_2  | C9_2  | C17_2 | -176.3(4) |
| C7_2  | C8_2  | C23_2 | C24_2 | -61.4(7)  |
| C7_2  | C8_2  | C23_2 | C28_2 | 114.9(5)  |
| C7_2  | C29_2 | C30_2 | C31_2 | -175.9(5) |
| C7_2  | C29_2 | C34_2 | C33_2 | 177.5(5)  |
| C8_2  | C7_2  | C29_2 | C30_2 | 114.7(5)  |
| C8_2  | C7_2  | C29_2 | C34_2 | -64.2(6)  |
| C8_2  | C9_2  | C10_2 | C4_2  | -1.2(7)   |
| C8_2  | C9_2  | C10_2 | C11_2 | 176.1(4)  |
| C8_2  | C9_2  | C17_2 | C18_2 | 107.2(6)  |
| C8_2  | C9_2  | C17_2 | C22_2 | -69.0(7)  |
| C8_2  | C23_2 | C24_2 | C25_2 | 179.4(6)  |
| C8_2  | C23_2 | C28_2 | C27_2 | -177.9(5) |
| C9_2  | C8_2  | C23_2 | C24_2 | 116.4(6)  |
| C9_2  | C8_2  | C23_2 | C28_2 | -67.3(7)  |
| C9_2  | C10_2 | C11_2 | C12_2 | -60.6(7)  |
| C9_2  | C10_2 | C11_2 | C16_2 | 122.9(5)  |
| C9_2  | C17_2 | C18_2 | C19_2 | -176.4(5) |
| C9_2  | C17_2 | C22_2 | C21_2 | 177.3(5)  |
| C10_2 | C4_2  | C5_2  | C6_2  | -173.5(4) |
| C10_2 | C4_2  | C5_2  | C7_2  | 3.0(8)    |
| C10_2 | C9_2  | C17_2 | C18_2 | -69.8(6)  |
| C10_2 | C9_2  | C17_2 | C22_2 | 114.1(6)  |
| C10_2 | C11_2 | C12_2 | C13_2 | -177.7(5) |
| C10_2 | C11_2 | C16_2 | C15_2 | 178.2(5)  |
| C11_2 | C12_2 | C13_2 | C14_2 | 1.2(9)    |
| C12_2 | C11_2 | C16_2 | C15_2 | 1.6(8)    |
| C12_2 | C13_2 | C14_2 | C15_2 | -1.5(10)  |
| C13_2 | C14_2 | C15_2 | C16_2 | 1.9(10)   |
| C14_2 | C15_2 | C16_2 | C11_2 | -2.0(9)   |
| C16_2 | C11_2 | C12_2 | C13_2 | -1.2(8)   |
| C17_2 | C9_2  | C10_2 | C4_2  | 175.7(4)  |
| C17_2 | C9_2  | C10_2 | C11_2 | -7.0(6)   |
| C17_2 | C18_2 | C19_2 | C20_2 | 2.2(10)   |
| C18_2 | C17_2 | C22_2 | C21_2 | 1.0(9)    |
| C18_2 | C19_2 | C20_2 | C21_2 | -5.1(11)  |
| C19_2 | C20_2 | C21_2 | C22_2 | 5.9(11)   |
| C20_2 | C21_2 | C22_2 | C17_2 | -3.8(10)  |
| C22_2 | C17_2 | C18_2 | C19_2 | -0.2(9)   |
| C23_2 | C8_2  | C9_2  | C10_2 | -177.1(4) |
| C23_2 | C8_2  | C9_2  | C17_2 | 6.0(6)    |
| C23_2 | C24_2 | C25_2 | C26_2 | -2.8(12)  |
| C24_2 | C23_2 | C28_2 | C27_2 | -1.5(9)   |
| C24_2 | C25_2 | C26_2 | C27_2 | 1.0(13)   |
| C25_2 | C26_2 | C27_2 | C28_2 | 0.5(13)   |

| Atom  | Atom  | Atom  | Atom  | Angle/°   |
|-------|-------|-------|-------|-----------|
| C26_2 | C27_2 | C28_2 | C23_2 | -0.2(11)  |
| C28_2 | C23_2 | C24_2 | C25_2 | 3.0(10)   |
| C29_2 | C7_2  | C8_2  | C9_2  | -174.1(4) |
| C29_2 | C7_2  | C8_2  | C23_2 | 3.5(6)    |
| C29_2 | C30_2 | C31_2 | C32_2 | -2.1(9)   |
| C30_2 | C29_2 | C34_2 | C33_2 | -1.5(8)   |
| C30_2 | C31_2 | C32_2 | C33_2 | -0.5(9)   |
| C31_2 | C32_2 | C33_2 | C34_2 | 2.0(10)   |
| C32_2 | C33_2 | C34_2 | C29_2 | -1.0(9)   |
| C34_2 | C29_2 | C30_2 | C31_2 | 3.1(8)    |
| O1_3  | C1_3  | C2_3  | N1_3  | 136.0(4)  |
| O1_3  | C1_3  | C2_3  | C35_3 | 3.7(5)    |
| O2_3  | C1_3  | C2_3  | N1_3  | -50.1(5)  |
| O2_3  | C1_3  | C2_3  | C35_3 | 177.5(3)  |
| O3_3  | C3_3  | C4_3  | C5_3  | -177.2(6) |
| O3_3  | C3_3  | C4_3  | C10_3 | 7.2(10)   |
| N1_3  | C2_3  | C35_3 | C36_3 | 171.2(3)  |
| N1_3  | C2_3  | C35_3 | C37_3 | 54.8(4)   |
| N1_3  | C2_3  | C35_3 | C38_3 | -65.1(4)  |
| N1_3  | C3_3  | C4_3  | C5_3  | 3.3(6)    |
| N1_3  | C3_3  | C4_3  | C10_3 | -172.3(5) |
| C1_3  | C2_3  | C35_3 | C36_3 | -58.2(4)  |
| C1_3  | C2_3  | C35_3 | C37_3 | -174.7(3) |
| C1_3  | C2_3  | C35_3 | C38_3 | 65.5(4)   |
| C2_3  | N1_3  | C3_3  | O3_3  | -4.8(7)   |
| C2_3  | N1_3  | C3_3  | C4_3  | 174.7(4)  |
| C2_3  | N1_3  | C6_3  | O4_3  | 5.0(8)    |
| C2_3  | N1_3  | C6_3  | C5_3  | -175.1(4) |
| C3_3  | N1_3  | C2_3  | C1_3  | 130.6(4)  |
| C3_3  | N1_3  | C2_3  | C35_3 | -95.5(4)  |
| C3_3  | N1_3  | C6_3  | O4_3  | -175.2(6) |
| C3_3  | N1_3  | C6_3  | C5_3  | 4.7(6)    |
| C3_3  | C4_3  | C5_3  | C6_3  | -0.5(6)   |
| C3_3  | C4_3  | C5_3  | C7_3  | -177.0(5) |
| C3_3  | C4_3  | C10_3 | C9_3  | 175.3(5)  |
| C3_3  | C4_3  | C10_3 | C11_3 | -2.1(8)   |
| C4_3  | C5_3  | C6_3  | O4_3  | 177.5(6)  |
| C4_3  | C5_3  | C6_3  | N1_3  | -2.5(6)   |
| C4_3  | C5_3  | C7_3  | C8_3  | -0.2(7)   |
| C4_3  | C5_3  | C7_3  | C29_3 | -179.2(4) |
| C4_3  | C10_3 | C11_3 | C12_3 | 106.3(6)  |
| C4_3  | C10_3 | C11_3 | C16_3 | -69.5(6)  |
| C5_3  | C4_3  | C10_3 | C9_3  | 0.3(7)    |
| C5_3  | C4_3  | C10_3 | C11_3 | -177.2(4) |
| C5_3  | C7_3  | C8_3  | C9_3  | 2.0(7)    |
| C5_3  | C7_3  | C8_3  | C23_3 | -175.7(4) |
| C5_3  | C7_3  | C29_3 | C30_3 | -122.2(5) |
| C5_3  | C7_3  | C29_3 | C34_3 | 69.0(7)   |
| C6_3  | N1_3  | C2_3  | C1_3  | -49.6(5)  |
| C6_3  | N1_3  | C2_3  | C35_3 | 84.3(5)   |
| C6_3  | N1_3  | C3_3  | O3_3  | 175.4(5)  |
| C6_3  | N1_3  | C3_3  | C4_3  | -5.1(6)   |
| C6_3  | C5_3  | C7_3  | C8_3  | -175.7(5) |
| C6_3  | C5_3  | C7_3  | C29_3 | 5.2(8)    |
| C7_3  | C5_3  | C6_3  | O4_3  | -6.5(10)  |
| C7_3  | C5_3  | C6_3  | N1_3  | 173.6(5)  |
| C7_3  | C8_3  | C9_3  | C10_3 | -2.8(7)   |
| C7_3  | C8_3  | C9_3  | C17_3 | -176.2(4) |
| C7_3  | C8_3  | C23_3 | C24_3 | -106.0(6) |
| C7_3  | C8_3  | C23_3 | C28_3 | 68.6(6)   |
| C7_3  | C29_3 | C30_3 | C31_3 | -174.1(5) |
| C7_3  | C29_3 | C34_3 | C33_3 | 171.7(5)  |
| C8_3  | C7_3  | C29_3 | C30_3 | 58.8(6)   |

| Atom  | Atom  | Atom  | Atom  | Angle/°   |
|-------|-------|-------|-------|-----------|
| C8_3  | C7_3  | C29_3 | C34_3 | -110.0(5) |
| C8_3  | C9_3  | C10_3 | C4_3  | 1.5(7)    |
| C8_3  | C9_3  | C10_3 | C11_3 | 179.0(4)  |
| C8_3  | C9_3  | C17_3 | C18_3 | 100.8(6)  |
| C8_3  | C9_3  | C17_3 | C22_3 | -80.5(6)  |
| C8_3  | C23_3 | C24_3 | C25_3 | 173.4(6)  |
| C8_3  | C23_3 | C28_3 | C27_3 | -175.4(5) |
| C9_3  | C8_3  | C23_3 | C24_3 | 76.2(7)   |
| C9_3  | C8_3  | C23_3 | C28_3 | -109.1(6) |
| C9_3  | C10_3 | C11_3 | C12_3 | -71.0(6)  |
| C9_3  | C10_3 | C11_3 | C16_3 | 113.2(5)  |
| C9_3  | C17_3 | C18_3 | C19_3 | -179.2(5) |
| C9_3  | C17_3 | C22_3 | C21_3 | -179.3(5) |
| C10_3 | C4_3  | C5_3  | C6_3  | 175.5(5)  |
| C10_3 | C4_3  | C5_3  | C7_3  | -1.0(8)   |
| C10_3 | C9_3  | C17_3 | C18_3 | -72.8(6)  |
| C10_3 | C9_3  | C17_3 | C22_3 | 105.9(6)  |
| C10_3 | C11_3 | C12_3 | C13_3 | -175.4(5) |
| C10_3 | C11_3 | C16_3 | C15_3 | 177.1(5)  |
| C11_3 | C12_3 | C13_3 | C14_3 | -1.4(10)  |
| C12_3 | C11_3 | C16_3 | C15_3 | 1.2(9)    |
| C12_3 | C13_3 | C14_3 | C15_3 | 0.7(10)   |
| C13_3 | C14_3 | C15_3 | C16_3 | 0.9(10)   |
| C14_3 | C15_3 | C16_3 | C11_3 | -1.9(10)  |
| C16_3 | C11_3 | C12_3 | C13_3 | 0.4(9)    |
| C17_3 | C9_3  | C10_3 | C4_3  | 175.2(4)  |
| C17_3 | C9_3  | C10_3 | C11_3 | -7.4(6)   |
| C17_3 | C18_3 | C19_3 | C20_3 | -1.9(10)  |
| C18_3 | C17_3 | C22_3 | C21_3 | -0.6(9)   |
| C18_3 | C19_3 | C20_3 | C21_3 | 0.1(11)   |
| C19_3 | C20_3 | C21_3 | C22_3 | 1.4(11)   |
| C20_3 | C21_3 | C22_3 | C17_3 | -1.1(11)  |
| C22_3 | C17_3 | C18_3 | C19_3 | 2.1(9)    |
| C23_3 | C8_3  | C9_3  | C10_3 | 174.9(4)  |
| C23_3 | C8_3  | C9_3  | C17_3 | 1.4(6)    |
| C23_3 | C24_3 | C25_3 | C26_3 | 3.4(11)   |
| C24_3 | C23_3 | C28_3 | C27_3 | -0.5(9)   |
| C24_3 | C25_3 | C26_3 | C27_3 | -3.6(11)  |
| C25_3 | C26_3 | C27_3 | C28_3 | 1.8(11)   |
| C26_3 | C27_3 | C28_3 | C23_3 | 0.3(11)   |
| C28_3 | C23_3 | C24_3 | C25_3 | -1.3(10)  |
| C29_3 | C7_3  | C8_3  | C9_3  | -178.9(4) |
| C29_3 | C7_3  | C8_3  | C23_3 | 3.4(6)    |
| C29_3 | C30_3 | C31_3 | C32_3 | 5.5(8)    |
| C30_3 | C29_3 | C34_3 | C33_3 | 2.8(8)    |
| C30_3 | C31_3 | C32_3 | C33_3 | -3.9(9)   |
| C31_3 | C32_3 | C33_3 | C34_3 | 1.8(9)    |
| C32_3 | C33_3 | C34_3 | C29_3 | -1.2(9)   |
| C34_3 | C29_3 | C30_3 | C31_3 | -4.9(8)   |
| O1_4  | C1_4  | C2_4  | N1_4  | 126.9(4)  |
| O1_4  | C1_4  | C2_4  | C35_4 | -3.5(5)   |
| O2_4  | C1_4  | C2_4  | N1_4  | -57.8(4)  |
| O2_4  | C1_4  | C2_4  | C35_4 | 171.9(3)  |
| O3_4  | C3_4  | C4_4  | C5_4  | -177.4(5) |
| O3_4  | C3_4  | C4_4  | C10_4 | -1.9(9)   |
| N1_4  | C2_4  | C35_4 | C36_4 | 174.8(3)  |
| N1_4  | C2_4  | C35_4 | C37_4 | 58.6(4)   |
| N1_4  | C2_4  | C35_4 | C38_4 | -61.0(4)  |
| N1_4  | C3_4  | C4_4  | C5_4  | 3.4(5)    |
| N1_4  | C3_4  | C4_4  | C10_4 | 178.8(5)  |
| C1_4  | C2_4  | C35_4 | C36_4 | -56.9(4)  |
| C1_4  | C2_4  | C35_4 | C37_4 | -173.2(3) |
| C1_4  | C2_4  | C35_4 | C38_4 | 67.2(4)   |

| Atom  | Atom  | Atom  | Atom  | Angle/°   |
|-------|-------|-------|-------|-----------|
| C2_4  | N1_4  | C3_4  | O3_4  | -1.6(7)   |
| C2_4  | N1_4  | C3_4  | C4_4  | 177.8(4)  |
| C2_4  | N1_4  | C6_4  | O4_4  | 6.0(8)    |
| C2_4  | N1_4  | C6_4  | C5_4  | -177.8(4) |
| C3_4  | N1_4  | C2_4  | C1_4  | 129.5(4)  |
| C3_4  | N1_4  | C2_4  | C35_4 | -98.4(4)  |
| C3_4  | N1_4  | C6_4  | O4_4  | -170.3(5) |
| C3_4  | N1_4  | C6_4  | C5_4  | 5.9(5)    |
| C3_4  | C4_4  | C5_4  | C6_4  | 0.2(5)    |
| C3_4  | C4_4  | C5_4  | C7_4  | 177.7(4)  |
| C3_4  | C4_4  | C10_4 | C9_4  | -177.6(5) |
| C3_4  | C4_4  | C10_4 | C11_4 | 3.6(8)    |
| C4_4  | C5_4  | C6_4  | O4_4  | 172.4(5)  |
| C4_4  | C5_4  | C6_4  | N1_4  | -3.6(5)   |
| C4_4  | C5_4  | C7_4  | C8_4  | -1.2(7)   |
| C4_4  | C5_4  | C7_4  | C29_4 | 173.5(4)  |
| C4_4  | C10_4 | C11_4 | C12_4 | 62.3(7)   |
| C4_4  | C10_4 | C11_4 | C16_4 | -125.0(5) |
| C5_4  | C4_4  | C10_4 | C9_4  | -2.7(7)   |
| C5_4  | C4_4  | C10_4 | C11_4 | 178.5(4)  |
| C5_4  | C7_4  | C8_4  | C9_4  | 1.9(7)    |
| C5_4  | C7_4  | C8_4  | C23_4 | 175.7(4)  |
| C5_4  | C7_4  | C29_4 | C30_4 | -57.2(6)  |
| C5_4  | C7_4  | C29_4 | C34_4 | 123.1(5)  |
| C6_4  | N1_4  | C2_4  | C1_4  | -46.4(5)  |
| C6_4  | N1_4  | C2_4  | C35_4 | 85.7(5)   |
| C6_4  | N1_4  | C3_4  | O3_4  | 174.8(5)  |
| C6_4  | N1_4  | C3_4  | C4_4  | -5.9(5)   |
| C6_4  | C5_4  | C7_4  | C8_4  | 175.7(5)  |
| C6_4  | C5_4  | C7_4  | C29_4 | -9.6(8)   |
| C7_4  | C5_4  | C6_4  | O4_4  | -4.9(9)   |
| C7_4  | C5_4  | C6_4  | N1_4  | 179.1(5)  |
| C7_4  | C8_4  | C9_4  | C10_4 | -3.1(7)   |
| C7_4  | C8_4  | C9_4  | C17_4 | 171.2(4)  |
| C7_4  | C8_4  | C23_4 | C24_4 | -89.8(6)  |
| C7_4  | C8_4  | C23_4 | C28_4 | 95.2(5)   |
| C7_4  | C29_4 | C30_4 | C31_4 | -175.0(5) |
| C7_4  | C29_4 | C34_4 | C33_4 | 177.8(5)  |
| C8_4  | C7_4  | C29_4 | C30_4 | 117.3(5)  |
| C8_4  | C7_4  | C29_4 | C34_4 | -62.4(6)  |
| C8_4  | C9_4  | C10_4 | C4_4  | 3.4(6)    |
| C8_4  | C9_4  | C10_4 | C11_4 | -177.8(4) |
| C8_4  | C9_4  | C17_4 | C18_4 | 67.6(6)   |
| C8_4  | C9_4  | C17_4 | C22_4 | -114.1(5) |
| C8_4  | C23_4 | C24_4 | C25_4 | -177.3(5) |
| C8_4  | C23_4 | C28_4 | C27_4 | 175.1(5)  |
| C9_4  | C8_4  | C23_4 | C24_4 | 84.2(6)   |
| C9_4  | C8_4  | C23_4 | C28_4 | -90.8(5)  |
| C9_4  | C10_4 | C11_4 | C12_4 | -116.5(5) |
| C9_4  | C10_4 | C11_4 | C16_4 | 56.2(6)   |
| C9_4  | C17_4 | C18_4 | C19_4 | -178.9(5) |
| C9_4  | C17_4 | C22_4 | C21_4 | 177.3(5)  |
| C10_4 | C4_4  | C5_4  | C6_4  | -175.8(4) |
| C10_4 | C4_4  | C5_4  | C7_4  | 1.7(8)    |
| C10_4 | C9_4  | C17_4 | C18_4 | -118.0(5) |
| C10_4 | C9_4  | C17_4 | C22_4 | 60.3(6)   |
| C10_4 | C11_4 | C12_4 | C13_4 | 174.0(5)  |
| C10_4 | C11_4 | C16_4 | C15_4 | -173.0(5) |
| C11_4 | C12_4 | C13_4 | C14_4 | -2.3(9)   |
| C12_4 | C11_4 | C16_4 | C15_4 | -0.1(8)   |
| C12_4 | C13_4 | C14_4 | C15_4 | 2.0(10)   |
| C13_4 | C14_4 | C15_4 | C16_4 | -0.7(10)  |
| C14_4 | C15_4 | C16_4 | C11_4 | -0.3(9)   |

| Atom   | Atom   | Atom   | Atom   | Angle/°    |
|--------|--------|--------|--------|------------|
| C16_4  | C11_4  | C12_4  | C13_4  | 1.4(8)     |
| C17_4  | C9_4   | C10_4  | C4_4   | -171.0(4)  |
| C17_4  | C9_4   | C10_4  | C11_4  | 7.9(6)     |
| C17_4  | C18_4  | C19_4  | C20_4  | -1.2(9)    |
| C18_4  | C17_4  | C22_4  | C21_4  | -4.3(8)    |
| C18_4  | C19_4  | C20_4  | C21_4  | 1.2(10)    |
| C19_4  | C20_4  | C21_4  | C22_4  | -2.7(10)   |
| C20_4  | C21_4  | C22_4  | C17_4  | 4.3(9)     |
| C22_4  | C17_4  | C18_4  | C19_4  | 2.8(8)     |
| C23_4  | C8_4   | C9_4   | C10_4  | -176.9(4)  |
| C23_4  | C8_4   | C9_4   | C17_4  | -2.6(6)    |
| C23_4  | C24_4  | C25_4  | C26_4  | 4.3(10)    |
| C24_4  | C23_4  | C28_4  | C27_4  | 0.0(8)     |
| C24_4  | C25_4  | C26_4  | C27_4  | -3.8(11)   |
| C25_4  | C26_4  | C27_4  | C28_4  | 1.5(11)    |
| C26_4  | C27_4  | C28_4  | C23_4  | 0.4(10)    |
| C28_4  | C23_4  | C24_4  | C25_4  | -2.3(8)    |
| C29_4  | C7_4   | C8_4   | C9_4   | -172.8(4)  |
| C29_4  | C7_4   | C8_4   | C23_4  | 1.0(6)     |
| C29_4  | C30_4  | C31_4  | C32_4  | -4.6(9)    |
| C30_4  | C29_4  | C34_4  | C33_4  | -1.9(8)    |
| C30_4  | C31_4  | C32_4  | C33_4  | 1.7(10)    |
| C31_4  | C32_4  | C33_4  | C34_4  | 1.1(10)    |
| C32_4  | C33_4  | C34_4  | C29_4  | -0.9(9)    |
| C34_4  | C29_4  | C30_4  | C31_4  | 4.7(8)     |
| Cl3_8  | C39_8  | C40_8  | C41_8  | -180.0(5)  |
| N2_8   | C39_8  | C40_8  | C41_8  | 0.9(11)    |
| C39_8  | N2_8   | C43_8  | C42_8  | -2.9(8)    |
| C39_8  | C40_8  | C41_8  | C42_8  | -2.1(11)   |
| C40_8  | C41_8  | C42_8  | C43_8  | 0.8(10)    |
| C41_8  | C42_8  | C43_8  | N2_8   | 1.9(9)     |
| C43_8  | N2_8   | C39_8  | Cl3_8  | -177.6(4)  |
| C43_8  | N2_8   | C39_8  | C40_8  | 1.5(9)     |
| Cl3_9  | C39_9  | C40_9  | C41_9  | -179.1(6)  |
| N2_9   | C39_9  | C40_9  | C41_9  | 1.2(11)    |
| C39_9  | N2_9   | C43_9  | C42_9  | 1.9(10)    |
| C39_9  | C40_9  | C41_9  | C42_9  | -0.7(11)   |
| C40_9  | C41_9  | C42_9  | C43_9  | 0.9(12)    |
| C41_9  | C42_9  | C43_9  | N2_9   | -1.5(11)   |
| C43_9  | N2_9   | C39_9  | Cl3_9  | 178.5(5)   |
| C43_9  | N2_9   | C39_9  | C40_9  | -1.8(10)   |
| Cl3_10 | C39_10 | C40_10 | C41_10 | -174.3(18) |
| N2_10  | C39_10 | C40_10 | C41_10 | 5(4)       |
| C39_10 | N2_10  | C43_10 | C42_10 | 1(4)       |
| C39_10 | C40_10 | C41_10 | C42_10 | -8(3)      |
| C40_10 | C41_10 | C42_10 | C43_10 | 7(4)       |
| C41_10 | C42_10 | C43_10 | N2_10  | -4(4)      |
| C43_10 | N2_10  | C39_10 | Cl3_10 | 177.9(17)  |
| C43_10 | N2_10  | C39_10 | C40_10 | -2(4)      |
| Cl3_13 | C39_13 | C40_13 | C41_13 | 176.7(16)  |
| N2_13  | C39_13 | C40_13 | C41_13 | -8(3)      |
| C39_13 | N2_13  | C43_13 | C42_13 | -2(2)      |
| C39_13 | C40_13 | C41_13 | C42_13 | 11(3)      |
| C40_13 | C41_13 | C42_13 | C43_13 | -9(3)      |
| C41_13 | C42_13 | C43_13 | N2_13  | 5(3)       |
| C43_13 | N2_13  | C39_13 | Cl3_13 | 179.1(11)  |
| C43_13 | N2_13  | C39_13 | C40_13 | 3(3)       |

Table 6: Hydrogen Fractional Atomic Coordinates ( $\times 10^4$ ) and Equivalent Isotropic Displacement Parameters ( $\text{\AA}^2 \times 10^3$ ) for JCS-Pyridine-TPPTTL-CoXtal-xtal2.  $U_{eq}$  is defined as 1/3 of the trace of the orthogonalised  $U_{ij}$ .

| Atom | x | y | z | $U_{eq}$ |
|------|---|---|---|----------|
|------|---|---|---|----------|

| Atom   | x        | y       | z       | <i>U<sub>eq</sub></i> |
|--------|----------|---------|---------|-----------------------|
| H2_1   | 8965.74  | 5011.76 | 6208.73 | 34                    |
| H12_1  | 9368.47  | 2416.2  | 5207.03 | 44                    |
| H13_1  | 9672.67  | 2819.53 | 4697.61 | 58                    |
| H14_1  | 9148.86  | 3728.82 | 4481.96 | 63                    |
| H15_1  | 8315.89  | 4247.75 | 4769.66 | 57                    |
| H16_1  | 8018.26  | 3883.63 | 5291.53 | 46                    |
| H18_1  | 7407.13  | 2295.58 | 5175.41 | 100                   |
| H19_1  | 7237.62  | 1577.29 | 4733.59 | 127                   |
| H20_1  | 7913.98  | 674.61  | 4673.58 | 135                   |
| H21_1  | 8775.08  | 473.3   | 5035.72 | 110                   |
| H22_1  | 8877.82  | 1113.99 | 5505.99 | 92                    |
| H24_1  | 8675.77  | 1003.67 | 6298.15 | 45                    |
| H25_1  | 8386.51  | -95.21  | 6341.96 | 54                    |
| H26_1  | 7440.46  | -489.97 | 6091.78 | 49                    |
| H27_1  | 6738.78  | 221.29  | 5814.49 | 48                    |
| H28_1  | 7005.56  | 1340.81 | 5769.15 | 49                    |
| H30_1  | 8801.35  | 2344.5  | 6806.24 | 56                    |
| H31_1  | 8577.77  | 1846.19 | 7304.6  | 84                    |
| H32_1  | 7556.26  | 1324.96 | 7380.71 | 84                    |
| H33_1  | 6751.69  | 1336.5  | 6981.19 | 74                    |
| H34_1  | 6982.19  | 1834.25 | 6479.46 | 52                    |
| H36A_1 | 10154.89 | 5495.57 | 6760.44 | 61                    |
| H36B_1 | 9396.73  | 5624.46 | 6862.55 | 61                    |
| H36C_1 | 9627.52  | 5737.16 | 6494.41 | 61                    |
| H37A_1 | 9995.45  | 4608.33 | 6166.9  | 72                    |
| H37B_1 | 10079.33 | 3998.54 | 6408.13 | 72                    |
| H37C_1 | 10506.18 | 4651.09 | 6464.88 | 72                    |
| H38A_1 | 9866.58  | 4431.11 | 7057.02 | 67                    |
| H38B_1 | 9475.25  | 3873.11 | 6861.34 | 67                    |
| H38C_1 | 9070.39  | 4447.71 | 7037.7  | 67                    |
| H2_2   | 6834.03  | 3421.67 | 6917.33 | 27                    |
| H12_2  | 4429.95  | 1411.53 | 6447.77 | 42                    |
| H13_2  | 4908.91  | 643.29  | 6099.03 | 53                    |
| H14_2  | 5663.84  | 964.23  | 5706.54 | 62                    |
| H15_2  | 5907.05  | 2059.97 | 5636.85 | 53                    |
| H16_2  | 5448.25  | 2851.99 | 5985.54 | 38                    |
| H18_2  | 3708.34  | 2931.68 | 5863.36 | 43                    |
| H19_2  | 2958.46  | 2395.31 | 5511.38 | 57                    |
| H20_2  | 2200.14  | 1661    | 5721.47 | 64                    |
| H21_2  | 2284.13  | 1312.57 | 6256.98 | 61                    |
| H22_2  | 3005.49  | 1855.02 | 6614.9  | 50                    |
| H24_2  | 2811.34  | 2984.07 | 7225.93 | 54                    |
| H25_2  | 1662.04  | 3072.52 | 7268.09 | 70                    |
| H26_2  | 1045.18  | 3506.18 | 6846.75 | 70                    |
| H27_2  | 1570.2   | 3820.17 | 6368.51 | 61                    |
| H28_2  | 2728.53  | 3695.15 | 6307.16 | 45                    |
| H30_2  | 4175     | 3549.56 | 7573.04 | 41                    |
| H31_2  | 3674.62  | 4150.32 | 7989.1  | 42                    |
| H32_2  | 2993.03  | 5034.68 | 7855.57 | 47                    |
| H33_2  | 2817.19  | 5328.74 | 7321.46 | 48                    |
| H34_2  | 3281.9   | 4692.28 | 6904.24 | 41                    |
| H36A_2 | 7630.44  | 3159.5  | 7259.49 | 52                    |
| H36B_2 | 7549.69  | 3145.41 | 7646.44 | 52                    |
| H36C_2 | 7666.15  | 3827.31 | 7462.79 | 52                    |
| H37A_2 | 5887.37  | 2853.97 | 7448    | 52                    |
| H37B_2 | 6503.34  | 2623.53 | 7666.99 | 52                    |
| H37C_2 | 6519.42  | 2512.52 | 7281.97 | 52                    |
| H38A_2 | 6741.01  | 4307.41 | 7703.84 | 46                    |
| H38B_2 | 6368.51  | 3706.8  | 7875.81 | 46                    |
| H38C_2 | 5996.45  | 4120.99 | 7599.79 | 46                    |
| H2_3   | 5099.99  | 5692    | 7145.95 | 25                    |
| H12_3  | 2323.41  | 7139.51 | 7002.66 | 46                    |
| H13_3  | 1524.11  | 6326.96 | 7085.13 | 54                    |

| Atom   | x        | y        | z       | $U_{eq}$ |
|--------|----------|----------|---------|----------|
| H14_3  | 1519     | 5387.87  | 6772.06 | 49       |
| H15_3  | 2324.02  | 5235.65  | 6378.74 | 52       |
| H16_3  | 3170.71  | 6015.39  | 6303.77 | 46       |
| H18_3  | 2677.98  | 7365.67  | 5926.13 | 47       |
| H19_3  | 1626.76  | 7621.65  | 5703.5  | 61       |
| H20_3  | 911.34   | 8295.61  | 5985.11 | 69       |
| H21_3  | 1210.7   | 8731.52  | 6484.45 | 67       |
| H22_3  | 2269.72  | 8522.64  | 6700.2  | 58       |
| H24_3  | 3120.12  | 9312.22  | 6628.37 | 50       |
| H25_3  | 3056.44  | 10337.65 | 6387.27 | 54       |
| H26_3  | 3462.26  | 10504.02 | 5869.24 | 57       |
| H27_3  | 4050.6   | 9674.14  | 5609.98 | 62       |
| H28_3  | 4178.74  | 8643.52  | 5857.62 | 47       |
| H30_3  | 4538.07  | 9277.54  | 6801.3  | 33       |
| H31_3  | 5347.47  | 10086.74 | 6733.66 | 35       |
| H32_3  | 6196.27  | 9918.28  | 6356.09 | 45       |
| H33_3  | 6327.62  | 8917.46  | 6103.3  | 35       |
| H34_3  | 5547.94  | 8082.75  | 6198.32 | 31       |
| H36A_3 | 5630.85  | 5804.56  | 7957.28 | 46       |
| H36B_3 | 6128.42  | 5689.05  | 7658.75 | 46       |
| H36C_3 | 5433.03  | 5306.3   | 7672.77 | 46       |
| H37A_3 | 4386.94  | 5875.57  | 7610.16 | 54       |
| H37B_3 | 4355.76  | 6634.99  | 7514.03 | 54       |
| H37C_3 | 4567.91  | 6423.64  | 7874.07 | 54       |
| H38A_3 | 5667.79  | 6996.9   | 7853.11 | 43       |
| H38B_3 | 5398.8   | 7293.52  | 7517.75 | 43       |
| H38C_3 | 6110.37  | 6940.57  | 7530.73 | 43       |
| H2_4   | 7124.92  | 7618.13  | 6432.41 | 26       |
| H12_4  | 7884.09  | 9193.77  | 5520.3  | 40       |
| H13_4  | 7146.77  | 9908.66  | 5261.65 | 45       |
| H14_4  | 6657.54  | 9625.37  | 4773.95 | 49       |
| H15_4  | 6837.21  | 8601.76  | 4552.75 | 46       |
| H16_4  | 7543.03  | 7848.79  | 4813.98 | 36       |
| H18_4  | 8870     | 7321.28  | 4542.16 | 39       |
| H19_4  | 9080.35  | 7852.18  | 4043.51 | 46       |
| H20_4  | 9263.81  | 8965.9   | 4034.32 | 51       |
| H21_4  | 9299.63  | 9565.18  | 4513.06 | 48       |
| H22_4  | 9042.83  | 9058.58  | 5008.28 | 42       |
| H24_4  | 10501.22 | 7963.91  | 5209.61 | 46       |
| H25_4  | 11414.54 | 7710.67  | 4887.1  | 62       |
| H26_4  | 11352.1  | 6872.76  | 4511.21 | 68       |
| H27_4  | 10422.59 | 6195.71  | 4500.72 | 67       |
| H28_4  | 9514.61  | 6390.58  | 4848.83 | 44       |
| H30_4  | 10035.8  | 7315.46  | 6108.82 | 41       |
| H31_4  | 10960.18 | 6744.07  | 6302.86 | 46       |
| H32_4  | 11222.4  | 5729.72  | 6076.17 | 49       |
| H33_4  | 10621.29 | 5317.64  | 5644.18 | 50       |
| H34_4  | 9747.19  | 5937.04  | 5423.57 | 38       |
| H36A_4 | 6937.63  | 7872.17  | 6973.72 | 60       |
| H36B_4 | 7457.77  | 8312.18  | 7171.99 | 60       |
| H36C_4 | 7515.84  | 7530.11  | 7181.02 | 60       |
| H37A_4 | 8067.48  | 8630.69  | 6397.08 | 54       |
| H37B_4 | 8038.14  | 8931.21  | 6756.13 | 54       |
| H37C_4 | 7363.33  | 8745.82  | 6570.43 | 54       |
| H38A_4 | 8634.07  | 7304.79  | 6875.31 | 63       |
| H38B_4 | 8692.63  | 8008.75  | 7044.48 | 63       |
| H38C_4 | 8880.62  | 7923.68  | 6668.8  | 63       |
| H1A_6  | 6512.23  | 5667.14  | 4300.53 | 74       |
| H1B_6  | 7206.7   | 5431.83  | 4147.16 | 74       |
| H40_8  | 6380.48  | 4708.15  | 5297.66 | 56       |
| H41_8  | 5845.41  | 5693.84  | 5159.25 | 61       |
| H42_8  | 5622.36  | 6474.97  | 5556.85 | 45       |
| H43_8  | 5965.94  | 6255.47  | 6094.2  | 38       |

| Atom   | x       | y       | z       | U <sub>eq</sub> |
|--------|---------|---------|---------|-----------------|
| H40_9  | 8460.95 | 5481.37 | 4870.97 | 57              |
| H41_9  | 8658.85 | 5054.06 | 5393    | 66              |
| H42_9  | 8134.21 | 5508.06 | 5843.76 | 70              |
| H43_9  | 7376.69 | 6375.87 | 5760.95 | 59              |
| H40_10 | 8423.39 | 5994.55 | 8250.2  | 74              |
| H41_10 | 9323.36 | 6626.15 | 8057.1  | 78              |
| H42_10 | 9533.19 | 6677.53 | 7500.47 | 97              |
| H43_10 | 8690.49 | 6312.07 | 7143.57 | 78              |
| H40_13 | 8153.78 | 6106.77 | 8246.81 | 119             |
| H41_13 | 8552.86 | 5030.21 | 8323.89 | 106             |
| H42_13 | 8769.19 | 4376.27 | 7870.86 | 95              |
| H43_13 | 8272.69 | 4683.22 | 7372.92 | 71              |

Table 7: Atomic Occupancies for all atoms that are not fully occupied in JCS-Pyridine-TPPTTL-CoXtal-xtal2.

| Atom   | Occupancy | Atom   | Occupancy | Atom   | Occupancy | Atom   | Occupancy |
|--------|-----------|--------|-----------|--------|-----------|--------|-----------|
| Cl3_10 | 0.405(5)  | H41_10 | 0.405(5)  | N2_13  | 0.595(5)  | C42_13 | 0.595(5)  |
| N2_10  | 0.405(5)  | C42_10 | 0.405(5)  | C39_13 | 0.595(5)  | H42_13 | 0.595(5)  |
| C39_10 | 0.405(5)  | H42_10 | 0.405(5)  | C40_13 | 0.595(5)  | C43_13 | 0.595(5)  |
| C40_10 | 0.405(5)  | C43_10 | 0.405(5)  | H40_13 | 0.595(5)  | H43_13 | 0.595(5)  |
| H40_10 | 0.405(5)  | H43_10 | 0.405(5)  | C41_13 | 0.595(5)  |        |           |
| C41_10 | 0.405(5)  | Cl3_13 | 0.595(5)  | H41_13 | 0.595(5)  |        |           |

Table 8: Solvent masking (Olex2) information for JCS-Pyridine-TPPTTL-CoXtal-xtal2.

| No | x      | y      | z      | V      | e      | Content |
|----|--------|--------|--------|--------|--------|---------|
| 1  | -0.615 | -0.822 | -0.761 | 7692.7 | 1167.2 | ?       |
| 2  | 0.037  | 0.583  | 0.236  | 0.0    | 0.0    | ?       |
| 3  | 0.046  | 0.917  | 0.889  | 0.0    | 0.0    | ?       |
| 4  | 0.046  | 0.931  | 0.894  | 0.0    | 0.0    | ?       |
| 5  | 0.065  | 0.398  | 0.227  | 0.0    | 0.0    | ?       |
| 6  | 0.074  | 0.546  | 0.301  | 0.0    | 0.0    | ?       |
| 7  | 0.083  | 0.194  | 0.032  | 0.0    | 0.0    | ?       |
| 8  | 0.083  | 0.204  | 0.028  | 0.0    | 0.0    | ?       |
| 9  | 0.093  | 0.093  | 0.796  | 0.0    | 0.0    | ?       |
| 10 | 0.093  | 0.889  | 0.838  | 0.0    | 0.0    | ?       |
| 11 | 0.102  | 0.880  | 0.829  | 0.0    | 0.0    | ?       |
| 12 | 0.111  | 0.556  | 0.319  | 0.0    | 0.0    | ?       |
| 13 | 0.111  | 0.880  | 0.824  | 0.0    | 0.0    | ?       |
| 14 | 0.120  | 0.574  | 0.324  | 0.0    | 0.0    | ?       |
| 15 | 0.130  | 0.713  | 0.602  | 0.0    | 0.0    | ?       |
| 16 | 0.130  | 0.796  | 0.056  | 0.0    | 0.0    | ?       |
| 17 | 0.130  | 0.806  | 0.060  | 0.0    | 0.0    | ?       |
| 18 | 0.130  | 0.954  | 0.778  | 0.0    | 0.0    | ?       |
| 19 | 0.139  | 0.375  | 0.162  | 0.0    | 0.0    | ?       |
| 20 | 0.139  | 0.444  | 0.222  | 0.0    | 0.0    | ?       |
| 21 | 0.148  | 0.444  | 0.218  | 0.0    | 0.0    | ?       |
| 22 | 0.148  | 0.481  | 0.384  | 0.0    | 0.0    | ?       |
| 23 | 0.148  | 0.685  | 0.509  | 0.0    | 0.0    | ?       |
| 24 | 0.157  | 0.093  | 0.801  | 0.0    | 0.0    | ?       |
| 25 | 0.157  | 0.444  | 0.213  | 0.0    | 0.0    | ?       |
| 26 | 0.157  | 0.648  | 0.403  | 0.0    | 0.0    | ?       |
| 27 | 0.157  | 0.667  | 0.495  | 0.0    | 0.0    | ?       |
| 28 | 0.157  | 0.685  | 0.505  | 0.0    | 0.0    | ?       |
| 29 | 0.167  | 0.296  | 0.282  | 0.0    | 0.0    | ?       |
| 30 | 0.176  | 0.204  | 0.829  | 0.0    | 0.0    | ?       |
| 31 | 0.176  | 0.278  | 0.292  | 0.0    | 0.0    | ?       |
| 32 | 0.176  | 0.690  | 0.486  | 0.0    | 0.0    | ?       |
| 33 | 0.176  | 0.907  | 0.454  | 0.0    | 0.0    | ?       |
| 34 | 0.185  | 0.148  | 0.912  | 0.0    | 0.0    | ?       |
| 35 | 0.185  | 0.278  | 0.287  | 0.0    | 0.0    | ?       |

| No | x     | y     | z     | V   | e    | Content |
|----|-------|-------|-------|-----|------|---------|
| 36 | 0.185 | 0.870 | 0.250 | 0.0 | 0.0  | ?       |
| 37 | 0.185 | 0.889 | 0.394 | 0.0 | 0.0  | ?       |
| 38 | 0.194 | 0.157 | 0.912 | 0.0 | 0.0  | ?       |
| 39 | 0.194 | 0.852 | 0.259 | 0.0 | 0.0  | ?       |
| 40 | 0.204 | 0.167 | 0.912 | 0.0 | 0.0  | ?       |
| 41 | 0.204 | 0.685 | 0.120 | 0.0 | 0.0  | ?       |
| 42 | 0.204 | 0.769 | 0.977 | 0.0 | 0.0  | ?       |
| 43 | 0.222 | 0.352 | 0.935 | 0.0 | 0.0  | ?       |
| 44 | 0.213 | 0.833 | 0.796 | 0.0 | 0.0  | ?       |
| 45 | 0.213 | 0.861 | 0.264 | 0.0 | 0.0  | ?       |
| 46 | 0.222 | 0.620 | 0.852 | 0.0 | 0.0  | ?       |
| 47 | 0.222 | 0.907 | 0.560 | 0.0 | 0.0  | ?       |
| 48 | 0.222 | 0.926 | 0.546 | 0.0 | -0.0 | ?       |
| 49 | 0.231 | 0.009 | 0.394 | 0.0 | 0.0  | ?       |
| 50 | 0.231 | 0.620 | 0.856 | 0.0 | 0.0  | ?       |
| 51 | 0.231 | 0.722 | 0.139 | 0.0 | 0.0  | ?       |
| 52 | 0.231 | 0.926 | 0.551 | 0.0 | -0.0 | ?       |
| 53 | 0.241 | 0.796 | 0.565 | 0.0 | 0.0  | ?       |
| 54 | 0.241 | 0.824 | 0.574 | 0.0 | 0.0  | ?       |
| 55 | 0.241 | 0.954 | 0.889 | 0.0 | 0.0  | ?       |
| 56 | 0.241 | 0.963 | 0.894 | 0.0 | 0.0  | ?       |
| 57 | 0.259 | 0.037 | 0.394 | 0.0 | 0.0  | ?       |
| 58 | 0.259 | 0.046 | 0.389 | 0.0 | 0.0  | ?       |
| 59 | 0.259 | 0.176 | 0.074 | 0.0 | 0.0  | ?       |
| 60 | 0.259 | 0.204 | 0.065 | 0.0 | 0.0  | ?       |
| 61 | 0.269 | 0.074 | 0.051 | 0.0 | 0.0  | ?       |
| 62 | 0.269 | 0.278 | 0.639 | 0.0 | 0.0  | ?       |
| 63 | 0.269 | 0.380 | 0.356 | 0.0 | 0.0  | ?       |
| 64 | 0.278 | 0.648 | 0.435 | 0.0 | 0.0  | ?       |
| 65 | 0.269 | 0.991 | 0.894 | 0.0 | 0.0  | ?       |
| 66 | 0.278 | 0.074 | 0.046 | 0.0 | 0.0  | ?       |
| 67 | 0.278 | 0.093 | 0.060 | 0.0 | 0.0  | ?       |
| 68 | 0.278 | 0.380 | 0.352 | 0.0 | 0.0  | ?       |
| 69 | 0.287 | 0.139 | 0.764 | 0.0 | 0.0  | ?       |
| 70 | 0.287 | 0.167 | 0.296 | 0.0 | 0.0  | ?       |
| 71 | 0.296 | 0.231 | 0.477 | 0.0 | 0.0  | ?       |
| 72 | 0.296 | 0.315 | 0.620 | 0.0 | 0.0  | ?       |
| 73 | 0.296 | 0.833 | 0.412 | 0.0 | 0.0  | ?       |
| 74 | 0.306 | 0.148 | 0.759 | 0.0 | 0.0  | ?       |
| 75 | 0.306 | 0.843 | 0.412 | 0.0 | 0.0  | ?       |
| 76 | 0.315 | 0.111 | 0.894 | 0.0 | 0.0  | ?       |
| 77 | 0.315 | 0.130 | 0.750 | 0.0 | 0.0  | ?       |
| 78 | 0.315 | 0.722 | 0.787 | 0.0 | 0.0  | ?       |
| 79 | 0.315 | 0.852 | 0.412 | 0.0 | 0.0  | ?       |
| 80 | 0.324 | 0.093 | 0.954 | 0.0 | 0.0  | ?       |
| 81 | 0.324 | 0.310 | 0.986 | 0.0 | 0.0  | ?       |
| 82 | 0.324 | 0.722 | 0.792 | 0.0 | 0.0  | ?       |
| 83 | 0.324 | 0.796 | 0.329 | 0.0 | 0.0  | ?       |
| 84 | 0.333 | 0.704 | 0.782 | 0.0 | 0.0  | ?       |
| 85 | 0.343 | 0.315 | 0.005 | 0.0 | 0.0  | ?       |
| 86 | 0.343 | 0.333 | 0.995 | 0.0 | 0.0  | ?       |
| 87 | 0.343 | 0.352 | 0.903 | 0.0 | 0.0  | ?       |
| 88 | 0.343 | 0.556 | 0.713 | 0.0 | 0.0  | ?       |
| 89 | 0.343 | 0.907 | 0.301 | 0.0 | 0.0  | ?       |
| 90 | 0.352 | 0.315 | 0.009 | 0.0 | 0.0  | ?       |
| 91 | 0.352 | 0.519 | 0.884 | 0.0 | 0.0  | ?       |
| 92 | 0.352 | 0.556 | 0.718 | 0.0 | 0.0  | ?       |
| 93 | 0.361 | 0.556 | 0.722 | 0.0 | 0.0  | ?       |
| 94 | 0.361 | 0.625 | 0.662 | 0.0 | 0.0  | ?       |
| 95 | 0.370 | 0.046 | 0.278 | 0.0 | 0.0  | ?       |
| 96 | 0.370 | 0.194 | 0.560 | 0.0 | 0.0  | ?       |
| 97 | 0.370 | 0.204 | 0.556 | 0.0 | 0.0  | ?       |
| 98 | 0.370 | 0.287 | 0.102 | 0.0 | 0.0  | ?       |

| No  | x     | y     | z     | V   | e    | Content |
|-----|-------|-------|-------|-----|------|---------|
| 99  | 0.380 | 0.426 | 0.824 | 0.0 | 0.0  | ?       |
| 100 | 0.389 | 0.120 | 0.324 | 0.0 | 0.0  | ?       |
| 101 | 0.389 | 0.444 | 0.819 | 0.0 | 0.0  | ?       |
| 102 | 0.398 | 0.120 | 0.329 | 0.0 | 0.0  | ?       |
| 103 | 0.407 | 0.111 | 0.338 | 0.0 | 0.0  | ?       |
| 104 | 0.407 | 0.907 | 0.296 | 0.0 | 0.0  | ?       |
| 105 | 0.417 | 0.796 | 0.528 | 0.0 | 0.0  | ?       |
| 106 | 0.417 | 0.806 | 0.532 | 0.0 | 0.0  | ?       |
| 107 | 0.426 | 0.454 | 0.801 | 0.0 | 0.0  | ?       |
| 108 | 0.435 | 0.602 | 0.727 | 0.0 | 0.0  | ?       |
| 109 | 0.454 | 0.069 | 0.394 | 0.0 | 0.0  | ?       |
| 110 | 0.454 | 0.083 | 0.389 | 0.0 | 0.0  | ?       |
| 111 | 0.463 | 0.417 | 0.736 | 0.0 | 0.0  | ?       |
| 112 | 0.537 | 0.917 | 0.764 | 0.0 | 0.0  | ?       |
| 113 | 0.546 | 0.569 | 0.106 | 0.0 | 0.0  | ?       |
| 114 | 0.546 | 0.583 | 0.111 | 0.0 | 0.0  | ?       |
| 115 | 0.565 | 0.102 | 0.773 | 0.0 | 0.0  | ?       |
| 116 | 0.574 | 0.954 | 0.699 | 0.0 | 0.0  | ?       |
| 117 | 0.583 | 0.296 | 0.972 | 0.0 | 0.0  | ?       |
| 118 | 0.583 | 0.306 | 0.968 | 0.0 | 0.0  | ?       |
| 119 | 0.593 | 0.407 | 0.204 | 0.0 | 0.0  | ?       |
| 120 | 0.593 | 0.611 | 0.162 | 0.0 | 0.0  | ?       |
| 121 | 0.602 | 0.620 | 0.171 | 0.0 | 0.0  | ?       |
| 122 | 0.611 | 0.620 | 0.176 | 0.0 | 0.0  | ?       |
| 123 | 0.611 | 0.944 | 0.681 | 0.0 | 0.0  | ?       |
| 124 | 0.620 | 0.926 | 0.676 | 0.0 | 0.0  | ?       |
| 125 | 0.630 | 0.546 | 0.222 | 0.0 | 0.0  | ?       |
| 126 | 0.630 | 0.694 | 0.940 | 0.0 | 0.0  | ?       |
| 127 | 0.630 | 0.704 | 0.944 | 0.0 | 0.0  | ?       |
| 128 | 0.630 | 0.787 | 0.398 | 0.0 | 0.0  | ?       |
| 129 | 0.639 | 0.056 | 0.778 | 0.0 | 0.0  | ?       |
| 130 | 0.639 | 0.125 | 0.838 | 0.0 | 0.0  | ?       |
| 131 | 0.648 | 0.019 | 0.616 | 0.0 | 0.0  | ?       |
| 132 | 0.648 | 0.056 | 0.782 | 0.0 | 0.0  | ?       |
| 133 | 0.648 | 0.815 | 0.491 | 0.0 | 0.0  | ?       |
| 134 | 0.657 | 0.056 | 0.787 | 0.0 | 0.0  | ?       |
| 135 | 0.657 | 0.407 | 0.199 | 0.0 | 0.0  | ?       |
| 136 | 0.657 | 0.815 | 0.495 | 0.0 | 0.0  | ?       |
| 137 | 0.657 | 0.833 | 0.505 | 0.0 | 0.0  | ?       |
| 138 | 0.657 | 0.852 | 0.597 | 0.0 | 0.0  | ?       |
| 139 | 0.667 | 0.204 | 0.718 | 0.0 | 0.0  | ?       |
| 140 | 0.676 | 0.222 | 0.708 | 0.0 | 0.0  | ?       |
| 141 | 0.676 | 0.296 | 0.171 | 0.0 | 0.0  | ?       |
| 142 | 0.676 | 0.593 | 0.546 | 0.0 | 0.0  | ?       |
| 143 | 0.676 | 0.810 | 0.514 | 0.0 | 0.0  | ?       |
| 144 | 0.685 | 0.222 | 0.713 | 0.0 | 0.0  | ?       |
| 145 | 0.685 | 0.352 | 0.088 | 0.0 | 0.0  | ?       |
| 146 | 0.685 | 0.611 | 0.606 | 0.0 | 0.0  | ?       |
| 147 | 0.685 | 0.630 | 0.750 | 0.0 | 0.0  | ?       |
| 148 | 0.694 | 0.343 | 0.088 | 0.0 | 0.0  | ?       |
| 149 | 0.694 | 0.648 | 0.741 | 0.0 | 0.0  | ?       |
| 150 | 0.704 | 0.333 | 0.088 | 0.0 | 0.0  | ?       |
| 151 | 0.704 | 0.731 | 0.023 | 0.0 | 0.0  | ?       |
| 152 | 0.704 | 0.815 | 0.880 | 0.0 | 0.0  | ?       |
| 153 | 0.722 | 0.148 | 0.065 | 0.0 | 0.0  | ?       |
| 154 | 0.713 | 0.639 | 0.736 | 0.0 | 0.0  | ?       |
| 155 | 0.713 | 0.667 | 0.204 | 0.0 | 0.0  | ?       |
| 156 | 0.722 | 0.574 | 0.454 | 0.0 | -0.0 | ?       |
| 157 | 0.722 | 0.593 | 0.440 | 0.0 | 0.0  | ?       |
| 158 | 0.722 | 0.880 | 0.148 | 0.0 | 0.0  | ?       |
| 159 | 0.731 | 0.491 | 0.606 | 0.0 | 0.0  | ?       |
| 160 | 0.731 | 0.574 | 0.449 | 0.0 | -0.0 | ?       |
| 161 | 0.731 | 0.778 | 0.861 | 0.0 | 0.0  | ?       |

| No  | x     | y     | z     | V   | e   | Content |
|-----|-------|-------|-------|-----|-----|---------|
| 162 | 0.731 | 0.880 | 0.144 | 0.0 | 0.0 | ?       |
| 163 | 0.741 | 0.537 | 0.106 | 0.0 | 0.0 | ?       |
| 164 | 0.741 | 0.546 | 0.111 | 0.0 | 0.0 | ?       |
| 165 | 0.741 | 0.676 | 0.426 | 0.0 | 0.0 | ?       |
| 166 | 0.741 | 0.704 | 0.435 | 0.0 | 0.0 | ?       |
| 167 | 0.759 | 0.296 | 0.935 | 0.0 | 0.0 | ?       |
| 168 | 0.759 | 0.324 | 0.926 | 0.0 | 0.0 | ?       |
| 169 | 0.759 | 0.454 | 0.611 | 0.0 | 0.0 | ?       |
| 170 | 0.759 | 0.463 | 0.606 | 0.0 | 0.0 | ?       |
| 171 | 0.769 | 0.120 | 0.644 | 0.0 | 0.0 | ?       |
| 172 | 0.769 | 0.222 | 0.361 | 0.0 | 0.0 | ?       |
| 173 | 0.769 | 0.426 | 0.949 | 0.0 | 0.0 | ?       |
| 174 | 0.769 | 0.509 | 0.106 | 0.0 | 0.0 | ?       |
| 175 | 0.778 | 0.852 | 0.565 | 0.0 | 0.0 | ?       |
| 176 | 0.778 | 0.120 | 0.648 | 0.0 | 0.0 | ?       |
| 177 | 0.778 | 0.407 | 0.940 | 0.0 | 0.0 | ?       |
| 178 | 0.778 | 0.426 | 0.954 | 0.0 | 0.0 | ?       |
| 179 | 0.787 | 0.333 | 0.704 | 0.0 | 0.0 | ?       |
| 180 | 0.787 | 0.361 | 0.236 | 0.0 | 0.0 | ?       |
| 181 | 0.796 | 0.185 | 0.380 | 0.0 | 0.0 | ?       |
| 182 | 0.796 | 0.269 | 0.523 | 0.0 | 0.0 | ?       |
| 183 | 0.796 | 0.667 | 0.588 | 0.0 | 0.0 | ?       |
| 184 | 0.806 | 0.352 | 0.241 | 0.0 | 0.0 | ?       |
| 185 | 0.806 | 0.657 | 0.588 | 0.0 | 0.0 | ?       |
| 186 | 0.815 | 0.370 | 0.250 | 0.0 | 0.0 | ?       |
| 187 | 0.815 | 0.389 | 0.106 | 0.0 | 0.0 | ?       |
| 188 | 0.815 | 0.648 | 0.588 | 0.0 | 0.0 | ?       |
| 189 | 0.815 | 0.778 | 0.213 | 0.0 | 0.0 | ?       |
| 190 | 0.824 | 0.190 | 0.014 | 0.0 | 0.0 | ?       |
| 191 | 0.824 | 0.407 | 0.046 | 0.0 | 0.0 | ?       |
| 192 | 0.824 | 0.704 | 0.671 | 0.0 | 0.0 | ?       |
| 193 | 0.824 | 0.778 | 0.208 | 0.0 | 0.0 | ?       |
| 194 | 0.833 | 0.796 | 0.218 | 0.0 | 0.0 | ?       |
| 195 | 0.843 | 0.148 | 0.097 | 0.0 | 0.0 | ?       |
| 196 | 0.843 | 0.167 | 0.005 | 0.0 | 0.0 | ?       |
| 197 | 0.843 | 0.185 | 0.995 | 0.0 | 0.0 | ?       |
| 198 | 0.843 | 0.593 | 0.699 | 0.0 | 0.0 | ?       |
| 199 | 0.843 | 0.944 | 0.287 | 0.0 | 0.0 | ?       |
| 200 | 0.852 | 0.185 | 0.991 | 0.0 | 0.0 | ?       |
| 201 | 0.852 | 0.944 | 0.282 | 0.0 | 0.0 | ?       |
| 202 | 0.852 | 0.981 | 0.116 | 0.0 | 0.0 | ?       |
| 203 | 0.861 | 0.875 | 0.338 | 0.0 | 0.0 | ?       |
| 204 | 0.861 | 0.944 | 0.278 | 0.0 | 0.0 | ?       |
| 205 | 0.870 | 0.213 | 0.898 | 0.0 | 0.0 | ?       |
| 206 | 0.870 | 0.296 | 0.444 | 0.0 | 0.0 | ?       |
| 207 | 0.870 | 0.306 | 0.440 | 0.0 | 0.0 | ?       |
| 208 | 0.870 | 0.454 | 0.722 | 0.0 | 0.0 | ?       |
| 209 | 0.880 | 0.074 | 0.176 | 0.0 | 0.0 | ?       |
| 210 | 0.889 | 0.056 | 0.181 | 0.0 | 0.0 | ?       |
| 211 | 0.889 | 0.380 | 0.676 | 0.0 | 0.0 | ?       |
| 212 | 0.898 | 0.380 | 0.671 | 0.0 | 0.0 | ?       |
| 213 | 0.907 | 0.389 | 0.662 | 0.0 | 0.0 | ?       |
| 214 | 0.907 | 0.593 | 0.704 | 0.0 | 0.0 | ?       |
| 215 | 0.917 | 0.694 | 0.468 | 0.0 | 0.0 | ?       |
| 216 | 0.917 | 0.704 | 0.472 | 0.0 | 0.0 | ?       |
| 217 | 0.926 | 0.046 | 0.199 | 0.0 | 0.0 | ?       |
| 218 | 0.935 | 0.898 | 0.273 | 0.0 | 0.0 | ?       |
| 219 | 0.954 | 0.417 | 0.611 | 0.0 | 0.0 | ?       |
| 220 | 0.954 | 0.431 | 0.606 | 0.0 | 0.0 | ?       |
| 221 | 0.963 | 0.083 | 0.264 | 0.0 | 0.0 | ?       |

#### Citations

O.V. Dolomanov and L.J. Bourhis and R.J. Gildea and J.A.K. Howard and H. Puschmann, Olex2: A complete structure solution, refinement and analysis program, *J. Appl. Cryst.*, (2009), 42, 339-341.

**7.2: 2,2,2-Trichloroethyl (1*S*,2*R*)-1-(4-bromophenyl)-2-(6-chloropyridin-3-yl)cyclopropane-1-carboxylate** crystallized from CH<sub>2</sub>Cl<sub>2</sub> for determination of absolute stereo-configuration.

## JCS-24-8-2020\_Mo

Submitted by: **Jack Sharland, Davies Group**

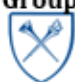

EMORY  
UNIVERSITY

**$R_1=2.44\%$**   
X-ray Crystallography  
Center

Solved by: **John Bacsa**

### Crystal Data and Experimental

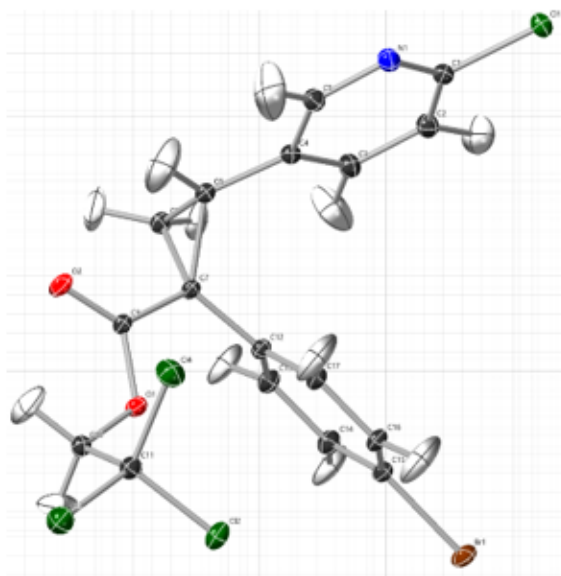

$Z' = 1$ ,  $\mu(\text{Mo K}\alpha) = 2.840 \text{ mm}^{-1}$ ,  
29643 reflections measured,  
9440 unique ( $R_{\text{int}} = 0.0349$ ) which  
were used in all calculations. The  
final  $wR_2$  was 0.0510 (all data)  
and  $R_1$  was 0.0244 ( $I \geq 2 \sigma(I)$ ).

**Experimental.** A single colorless prismatic crystal of **JCS-24-8-2020\_Mo** with dimensions  $0.33 \times 0.28 \times 0.22 \text{ mm}^3$  was chosen from the sample as supplied and mounted on a loop with paratone on a XtaLAB Synergy-S diffractometer. The crystal was kept at a constant  $T = 100.0(1) \text{ K}$  during data collection. The structure was solved with the ShelXT (Sheldrick, 2015) solution program using dual methods and by using Olex2 (Dolomanov et al., 2009) as the graphical interface. The model was refined with olex2.refine 1.3-dev (Bourhis et al., 2015) using full matrix least squares minimisation on  $F^2$ .

**Crystal Data.**  $\text{C}_{17}\text{H}_{12}\text{BrCl}_4\text{NO}_2$ ,  $M_r = 484.004$ , monoclinic,  $P2_1$  (No. 4),  $a = 5.95245(14) \text{ \AA}$ ,  $b = 9.2860(2) \text{ \AA}$ ,  $c = 16.6609(4) \text{ \AA}$ ,  $\beta = 96.220(2)^\circ$ ,  $\alpha = \gamma = 90^\circ$ ,  $V = 915.50(4) \text{ \AA}^3$ ,  $T = 100.00(10) \text{ K}$ ,  $Z = 2$ ,

**Compound**                      **JCS-24-8-2020\_Mo**

|                             |                                                                   |
|-----------------------------|-------------------------------------------------------------------|
| Formula                     | C <sub>17</sub> H <sub>12</sub> BrCl <sub>4</sub> NO <sub>2</sub> |
| $D_{calc}/\text{g cm}^{-3}$ | 1.756                                                             |
| $\mu/\text{mm}^{-1}$        | 2.840                                                             |
| Formula Weight              | 484.004                                                           |
| Color                       | colorless                                                         |
| Shape                       | prism                                                             |
| Size/mm <sup>3</sup>        | 0.33×0.28×0.22                                                    |
| $T/\text{K}$                | 100.00(10)                                                        |
| Crystal System              | monoclinic                                                        |
| Flack Parameter             | 0.015(3)                                                          |
| Hooft Parameter             | -0.001(2)                                                         |
| Space Group                 | $P2_1$                                                            |
| $a/\text{\AA}$              | 5.95245(14)                                                       |
| $b/\text{\AA}$              | 9.2860(2)                                                         |
| $c/\text{\AA}$              | 16.6609(4)                                                        |
| $\alpha/^\circ$             | 90                                                                |
| $\beta/^\circ$              | 96.220(2)                                                         |
| $\gamma/^\circ$             | 90                                                                |
| $V/\text{\AA}^3$            | 915.50(4)                                                         |
| $Z$                         | 2                                                                 |
| $Z'$                        | 1                                                                 |
| Wavelength/ $\text{\AA}$    | 0.71073                                                           |
| Radiation type              | Mo $K_\alpha$                                                     |
| $\theta_{min}/^\circ$       | 2.46                                                              |
| $\theta_{max}/^\circ$       | 38.07                                                             |
| Measured Refl's.            | 29643                                                             |
| Indep't Refl's              | 9440                                                              |
| Refl's $I \geq 2 \sigma(I)$ | 8716                                                              |
| $R_{int}$                   | 0.0349                                                            |
| Parameters                  | 347                                                               |
| Restraints                  | 40                                                                |
| Largest Peak                | 0.5379                                                            |
| Deepest Hole                | -0.4013                                                           |
| GooF                        | 0.9915                                                            |
| $wR_2$ (all data)           | 0.0510                                                            |
| $wR_2$                      | 0.0500                                                            |
| $R_1$ (all data)            | 0.0288                                                            |
| $R_1$                       | 0.0244                                                            |

The Flack parameter was refined to 0.01(1). Determination of absolute structure using Bayesian statistics on Bijvoet differences using the Olex2 results in -0.001(2). Note: The Flack parameter is used to determine chirality of the crystal studied, the value should be near 0, a value of 1 means that the stereochemistry is wrong and the model should be inverted. A value of 0.5 means that the crystal consists of a racemic mixture of the two enantiomers.

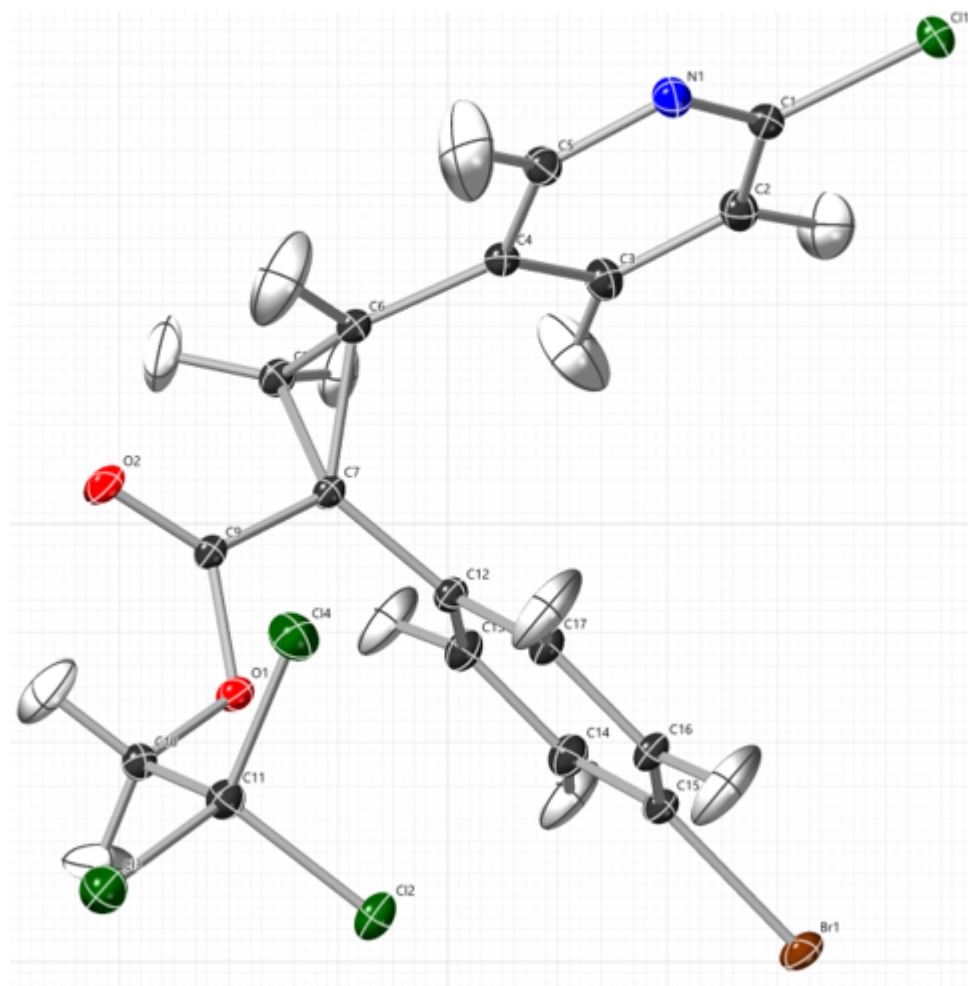

**Figure 1:** Thermal ellipsoid representation of the asymmetric unit. There is one molecule of the target compound in the asymmetric unit, which is represented by the reported sum formula. In other words: Z is 2 and Z' is 1.

## Data Plots: Diffraction Data

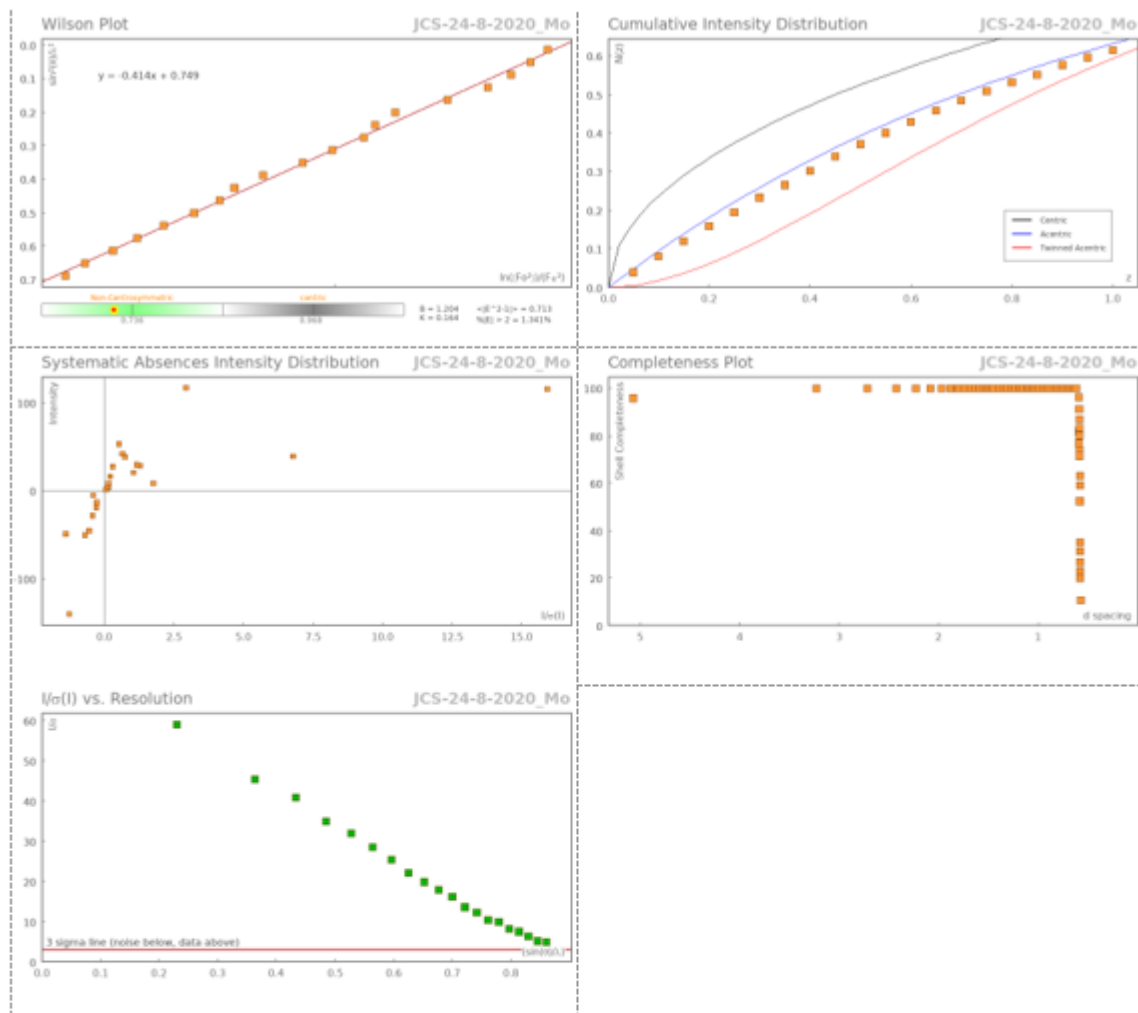

## Data Plots: Refinement and Data

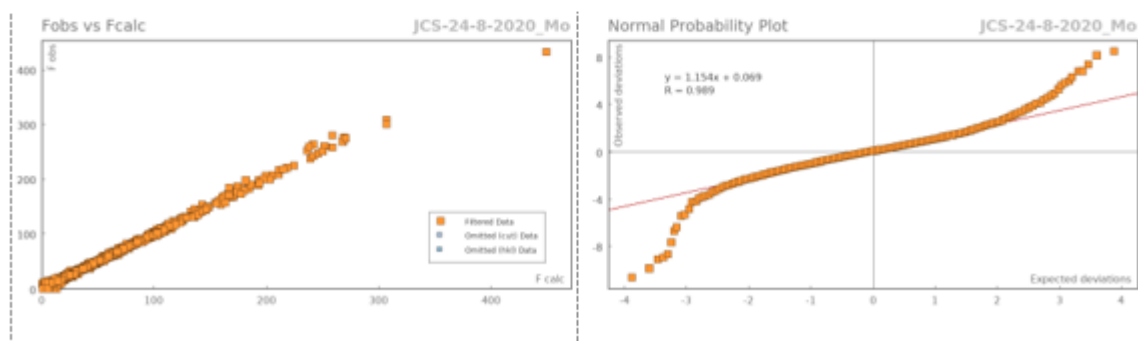

## Reflection Statistics

|                                     |       |                    |      |
|-------------------------------------|-------|--------------------|------|
| Total reflections (after filtering) | 29668 | Unique reflections | 9440 |
|-------------------------------------|-------|--------------------|------|

**Table 1:** Fractional Atomic Coordinates ( $\times 10^4$ ) and Equivalent Isotropic Displacement Parameters ( $\text{\AA}^2 \times 10^3$ ) for JCS-24-8-2020\_Mo.  $U_{eq}$  is defined as 1/3 of the trace of the orthogonalised  $U_{ij}$ .

| Atom | x          | y          | z           | $U_{eq}$  |
|------|------------|------------|-------------|-----------|
| Br1  | 9489.9(4)  | 1071.2(3)  | 2773.30(15) | 17.09(8)  |
| Cl1  | 10893.2(5) | 7812.1(4)  | -710.80(16) | 17.14(5)  |
| Cl3  | 5844.1(5)  | 8112.4(4)  | 5800.00(16) | 19.76(6)  |
| Cl2  | 8033.0(4)  | 5965.6(4)  | 4902.20(16) | 18.09(5)  |
| Cl4  | 7375.4(5)  | 8821.2(4)  | 4248.00(18) | 20.01(6)  |
| O1   | 4056.1(13) | 6478.6(9)  | 3647.9(5)   | 12.68(14) |
| O2   | 1964.1(16) | 8273.1(11) | 3042.8(5)   | 22.16(19) |
| N1   | 8424.2(17) | 8920.8(11) | 329.6(6)    | 15.78(17) |
| C3   | 5994.9(19) | 6406.3(12) | 530.4(7)    | 14.08(19) |
| C2   | 7616.4(19) | 6445.8(12) | -6.2(7)     | 14.31(18) |
| C17  | 7408.4(18) | 5337.3(12) | 2649.1(6)   | 12.40(17) |
| C7   | 3712.1(17) | 6568.7(12) | 2229.2(6)   | 11.41(16) |
| C12  | 5167.6(17) | 5253.4(12) | 2302.6(6)   | 11.09(17) |
| C9   | 3135.2(18) | 7227.2(12) | 2999.7(6)   | 12.70(17) |
| C8   | 1890.1(18) | 6736.7(13) | 1529.0(6)   | 14.46(19) |
| C4   | 5596.6(18) | 7633.3(12) | 982.7(6)    | 11.77(17) |
| C1   | 8780.0(18) | 7731.7(13) | -70.1(6)    | 13.08(17) |
| C14  | 5546.3(18) | 2654.4(13) | 2223.9(6)   | 14.44(18) |
| C6   | 3885.6(18) | 7719.5(13) | 1563.8(6)   | 13.11(18) |
| C5   | 6860(2)    | 8858.6(13) | 849.2(6)    | 14.82(18) |
| C16  | 8710.7(18) | 4099.8(12) | 2791.4(6)   | 13.12(17) |
| C15  | 7756.9(18) | 2766.5(12) | 2580.3(6)   | 12.85(17) |
| C13  | 4268.5(18) | 3904.9(13) | 2089.0(6)   | 13.12(17) |
| C10  | 3847.7(18) | 7058.3(13) | 4426.5(6)   | 12.64(17) |
| C11  | 6187.9(19) | 7464.3(12) | 4824.4(6)   | 13.38(18) |

**Table 2:** Anisotropic Displacement Parameters ( $\times 10^4$ ) for JCS-24-8-2020\_Mo. The anisotropic displacement factor exponent takes the form:  $-2\pi^2[h^2a^{*2} \times U_{11} + \dots + 2hka^* \times b^* \times U_{12}]$

| Atom | $U_{11}$  | $U_{22}$  | $U_{33}$  | $U_{23}$  | $U_{13}$ | $U_{12}$  |
|------|-----------|-----------|-----------|-----------|----------|-----------|
| Br1  | 21.06(15) | 10.90(13) | 19.24(14) | 6.32(12)  | 1.92(10) | 2.03(12)  |
| Cl1  | 16.51(12) | 20.98(13) | 14.81(10) | 2.22(10)  | 5.78(9)  | 2.08(9)   |
| Cl3  | 23.66(13) | 22.06(14) | 13.0(1)   | 3.31(11)  | -0.55(9) | -4.87(9)  |
| Cl2  | 14.88(10) | 17.36(12) | 21.36(11) | 4.50(11)  | -1.09(8) | -1.21(10) |
| Cl4  | 22.63(13) | 15.39(12) | 22.72(12) | -5.67(10) | 5.68(10) | -0.10(9)  |
| O1   | 15.1(3)   | 11.5(3)   | 11.2(3)   | 3.6(3)    | 0.5(3)   | 0.4(2)    |
| O2   | 28.9(5)   | 22.7(4)   | 15.5(4)   | 17.3(4)   | 5.1(3)   | 3.8(3)    |
| N1   | 17.9(4)   | 12.1(4)   | 18.3(4)   | 0.8(3)    | 6.4(3)   | 1.6(3)    |
| C3   | 14.3(4)   | 14.0(5)   | 14.4(4)   | -0.9(3)   | 3.3(3)   | -1.6(3)   |
| C2   | 15.4(4)   | 14.8(4)   | 12.9(4)   | 0.5(3)    | 2.4(3)   | -2.1(3)   |
| C17  | 10.0(4)   | 11.8(4)   | 15.1(4)   | 1.5(3)    | -0.0(3)  | -0.4(3)   |
| C7   | 10.6(4)   | 12.4(4)   | 11.1(4)   | 3.0(3)    | 0.8(3)   | 1.0(3)    |
| C12  | 10.2(4)   | 11.4(4)   | 11.5(4)   | 1.6(3)    | 0.4(3)   | 0.3(3)    |
| C9   | 12.6(4)   | 13.6(4)   | 12.1(4)   | 4.4(3)    | 2.0(3)   | 1.5(3)    |
| C8   | 10.4(4)   | 19.4(5)   | 13.3(4)   | 2.8(4)    | -0.1(3)  | 2.4(4)    |
| C4   | 12.3(4)   | 12.2(4)   | 10.8(4)   | 1.3(3)    | 1.5(3)   | 1.2(3)    |
| C1   | 13.5(4)   | 14.2(4)   | 11.7(4)   | 1.7(3)    | 2.1(3)   | 1.2(3)    |
| C14  | 14.5(5)   | 10.8(4)   | 17.9(4)   | 0.5(3)    | 1.2(4)   | -1.7(3)   |
| C6   | 13.0(4)   | 14.1(5)   | 12.4(4)   | 3.7(4)    | 2.1(3)   | 2.4(3)    |
| C5   | 18.6(5)   | 11.0(4)   | 15.7(4)   | 1.8(4)    | 5.6(3)   | 0.3(3)    |
| C16  | 11.1(4)   | 12.8(4)   | 14.9(4)   | 3.3(3)    | -0.6(3)  | 0.4(3)    |

| Atom | $U_{11}$ | $U_{22}$ | $U_{33}$ | $U_{23}$ | $U_{13}$  | $U_{12}$ |
|------|----------|----------|----------|----------|-----------|----------|
| C15  | 14.4(4)  | 11.2(4)  | 13.1(4)  | 3.5(3)   | 2.1(3)    | 1.1(3)   |
| C13  | 10.8(4)  | 12.2(4)  | 15.7(4)  | 0.6(3)   | -1.1(3)   | -1.9(3)  |
| C10  | 12.8(4)  | 13.7(4)  | 11.5(4)  | 1.8(3)   | 1.9(3)    | 0.1(3)   |
| C11  | 13.8(4)  | 12.2(4)  | 13.9(4)  | 0.3(3)   | 0.7(3)    | -1.4(3)  |
| H8a  | 13(8)    | 35(7)    | 28(8)    | 4(6)     | -2(7)     | -12(4)   |
| H2   | 47(14)   | 24(7)    | 31(10)   | 7(6)     | 9(8)      | -12(4)   |
| H13  | 16(2)    | 11(3)    | 58(9)    | 1.7(10)  | -11.9(17) | -4.6(15) |
| H10a | 38(10)   | 28(6)    | 41(12)   | 21(4)    | -6(8)     | -6(7)    |
| H17  | 19(2)    | 14(3)    | 78(10)   | 3.0(10)  | -18.4(18) | -6.6(17) |
| H3   | 58(13)   | 29(6)    | 44(13)   | -26(4)   | 28(10)    | -12(6)   |
| H16  | 19(2)    | 14(3)    | 78(10)   | 3.0(10)  | -18.4(18) | -6.6(17) |
| H8b  | 19(6)    | 53(14)   | 45(13)   | 17(4)    | 7(5)      | -5(9)    |
| H6   | 32(11)   | 25(4)    | 82(16)   | 9(4)     | -3(11)    | -23(3)   |
| H14  | 16(2)    | 11(3)    | 58(9)    | 1.7(10)  | -11.9(17) | -4.6(15) |
| H10b | 21(9)    | 44(11)   | 33(10)   | -13(5)   | -8(6)     | 25(5)    |
| H5   | 51(13)   | 32(7)    | 74(14)   | -5(7)    | 29(10)    | -33(4)   |

Table 3: Bond Lengths in Å for JCS-24-8-2020\_Mo.

| Atom | Atom | Length/Å   |
|------|------|------------|
| Br1  | C15  | 1.8905(11) |
| Cl1  | C1   | 1.7373(11) |
| Cl3  | C11  | 1.7658(11) |
| Cl2  | C11  | 1.7689(11) |
| Cl4  | C11  | 1.7767(11) |
| O1   | C9   | 1.3497(13) |
| O1   | C10  | 1.4223(13) |
| O2   | C9   | 1.2022(14) |
| N1   | C1   | 1.3184(15) |
| N1   | C5   | 1.3397(14) |
| C3   | C2   | 1.3853(16) |
| C3   | C4   | 1.4004(15) |
| C2   | C1   | 1.3903(16) |
| C17  | C12  | 1.3970(15) |

| Atom | Atom | Length/Å   |
|------|------|------------|
| C17  | C16  | 1.3921(15) |
| C7   | C12  | 1.4948(15) |
| C7   | C9   | 1.4951(15) |
| C7   | C8   | 1.5124(14) |
| C7   | C6   | 1.5513(15) |
| C12  | C13  | 1.3928(16) |
| C8   | C6   | 1.4941(16) |
| C4   | C6   | 1.4814(15) |
| C4   | C5   | 1.3949(16) |
| C14  | C15  | 1.3877(15) |
| C14  | C13  | 1.3930(16) |
| C16  | C15  | 1.3913(16) |
| C10  | C11  | 1.5238(15) |

Table 4: Bond Angles in ° for JCS-24-8-2020\_Mo.

| Atom | Atom | Atom | Angle/°    |
|------|------|------|------------|
| C10  | O1   | C9   | 117.83(9)  |
| C5   | N1   | C1   | 116.82(10) |
| C4   | C3   | C2   | 119.75(10) |
| C1   | C2   | C3   | 117.38(10) |
| C16  | C17  | C12  | 120.90(10) |
| C9   | C7   | C12  | 116.68(8)  |
| C8   | C7   | C12  | 120.55(9)  |
| C8   | C7   | C9   | 114.07(9)  |
| C6   | C7   | C12  | 122.58(9)  |
| C6   | C7   | C9   | 111.79(9)  |
| C6   | C7   | C8   | 58.36(7)   |
| C7   | C12  | C17  | 120.48(10) |
| C13  | C12  | C17  | 118.62(10) |
| C13  | C12  | C7   | 120.69(9)  |
| O2   | C9   | O1   | 123.79(10) |

| Atom | Atom | Atom | Angle/°    |
|------|------|------|------------|
| C7   | C9   | O1   | 111.42(9)  |
| C7   | C9   | O2   | 124.77(10) |
| C6   | C8   | C7   | 62.12(7)   |
| C6   | C4   | C3   | 124.34(10) |
| C5   | C4   | C3   | 116.89(10) |
| C5   | C4   | C6   | 118.73(10) |
| N1   | C1   | Cl1  | 116.17(9)  |
| C2   | C1   | Cl1  | 118.94(8)  |
| C2   | C1   | N1   | 124.89(10) |
| C13  | C14  | C15  | 118.84(10) |
| C8   | C6   | C7   | 59.52(7)   |
| C4   | C6   | C7   | 122.24(9)  |
| C4   | C6   | C8   | 122.79(10) |
| C4   | C5   | N1   | 124.24(11) |
| C15  | C16  | C17  | 119.15(10) |

| Atom | Atom | Atom | Angle/°    |
|------|------|------|------------|
| C14  | C15  | Br1  | 119.01(9)  |
| C16  | C15  | Br1  | 119.86(8)  |
| C16  | C15  | C14  | 121.13(10) |
| C14  | C13  | C12  | 121.35(9)  |
| C11  | C10  | O1   | 108.94(8)  |
| Cl2  | C11  | Cl3  | 109.49(6)  |

| Atom | Atom | Atom | Angle/°   |
|------|------|------|-----------|
| Cl4  | C11  | Cl3  | 110.39(6) |
| Cl4  | C11  | Cl2  | 108.50(6) |
| C10  | C11  | Cl3  | 107.05(7) |
| C10  | C11  | Cl2  | 111.61(8) |
| C10  | C11  | Cl4  | 109.80(8) |

**Table 5:** Torsion Angles in ° for JCS-24-8-2020\_Mo.

| Atom | Atom | Atom | Atom | Angle/°    |
|------|------|------|------|------------|
| Br1  | C15  | C14  | C13  | 179.45(8)  |
| Br1  | C15  | C16  | C17  | -179.67(8) |
| Cl1  | C1   | N1   | C5   | -177.51(8) |
| Cl1  | C1   | C2   | C3   | 177.89(9)  |
| Cl3  | C11  | C10  | O1   | -177.85(7) |
| Cl2  | C11  | C10  | O1   | -58.06(8)  |
| Cl4  | C11  | C10  | O1   | 62.30(8)   |
| O1   | C9   | C7   | C12  | -0.48(11)  |
| O1   | C9   | C7   | C8   | 147.45(9)  |
| O1   | C9   | C7   | C6   | -148.66(9) |
| O2   | C9   | C7   | C12  | -          |
|      |      |      |      | 179.07(12) |
| O2   | C9   | C7   | C8   | -31.14(14) |
| O2   | C9   | C7   | C6   | 32.74(13)  |
| N1   | C1   | C2   | C3   | -1.38(13)  |
| N1   | C5   | C4   | C3   | -0.88(13)  |
| N1   | C5   | C4   | C6   | -          |
|      |      |      |      | 178.81(11) |
| C3   | C4   | C6   | C7   | 50.03(12)  |
| C3   | C4   | C6   | C8   | -22.09(12) |
| C17  | C12  | C7   | C9   | -66.46(11) |
| C17  | C12  | C7   | C8   | 147.79(10) |
| C17  | C12  | C7   | C6   | 78.02(11)  |
| C17  | C12  | C13  | C14  | 0.83(12)   |
| C17  | C16  | C15  | C14  | 0.70(12)   |
| C7   | C12  | C13  | C14  | -173.95(9) |
| C7   | C8   | C6   | C4   | 110.93(7)  |
| C7   | C6   | C4   | C5   | -          |
|      |      |      |      | 132.20(11) |
| C12  | C13  | C14  | C15  | 0.14(12)   |
| C8   | C6   | C4   | C5   | 155.68(10) |

**Table 6:** Hydrogen Fractional Atomic Coordinates ( $\times 10^4$ ) and Equivalent Isotropic Displacement Parameters ( $\text{\AA}^2 \times 10^3$ ) for JCS-24-8-2020\_Mo.  $U_{eq}$  is defined as 1/3 of the trace of the orthogonalised  $U_{ij}$ .

| Atom | x         | y        | z        | $U_{eq}$ |
|------|-----------|----------|----------|----------|
| H8a  | 1790(30)  | 5870(30) | 1081(10) | 26(5)    |
| H2   | 8020(40)  | 5460(20) | -375(12) | 34(5)    |
| H13  | 2500(30)  | 3750(20) | 1856(12) | 30(3)    |
| H10a | 2720(30)  | 7980(20) | 4382(12) | 36(5)    |
| H17  | 8310(30)  | 6360(20) | 2844(13) | 39(4)    |
| H3   | 4950(40)  | 5380(20) | 603(13)  | 42(6)    |
| H16  | 10380(30) | 4170(20) | 3016(13) | 39(4)    |
| H8b  | 380(30)   | 7270(20) | 1655(12) | 39(6)    |
| H6   | 3590(30)  | 8860(20) | 1769(14) | 47(6)    |

| Atom | x        | y        | z        | $U_{eq}$ |
|------|----------|----------|----------|----------|
| H14  | 4780(30) | 1700(20) | 2079(12) | 30(3)    |
| H10b | 3140(30) | 6220(30) | 4781(11) | 34(5)    |
| H5   | 6590(30) | 9800(20) | 1196(13) | 51(6)    |

## Citations

CrysAlisPro (ROD), Rigaku Oxford Diffraction, Poland (?).

CrysAlisPro Software System, Rigaku Oxford Diffraction, (2020).

L.J. Bourhis and O.V. Dolomanov and R.J. Gildea and J.A.K. Howard and H. Puschmann, The Anatomy of a Comprehensive Constrained, Restrained, Refinement Program for the Modern Computing Environment - Olex2 Disected, *Acta Cryst. A*, (2015), **A71**, 59-71.

O.V. Dolomanov and L.J. Bourhis and R.J. Gildea and J.A.K. Howard and H. Puschmann, Olex2: A complete structure solution, refinement and analysis program, *J. Appl. Cryst.*, (2009), **42**, 339-341.

, *J. Appl. Cryst.*, (2009), **42**, 339-341.

7.3: Methyl (1*S*,2*S*)-2-(2-chloropyridin-3-yl)-1-(2-methoxy-5-methylphenyl)cyclopropane-1-carboxylate crystallized from IPA for determination of absolute stereo-configuration.

JCS-ELN46-0036

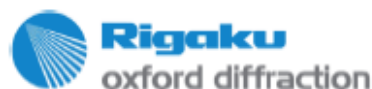

Submitted by: Jack Sharland  
Emory University  
Solved by: John Bacsá  
Sample ID: JCS-ELN46-0036

$R_1=2.51\%$

Crystal Data and Experimental

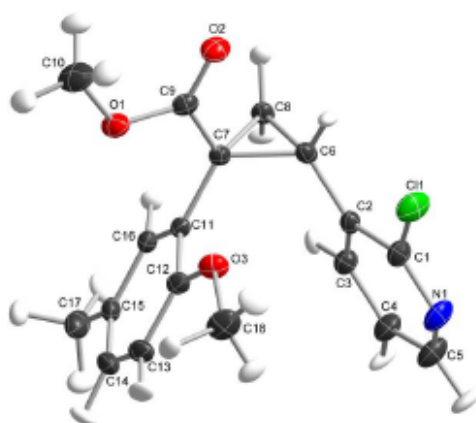

**Experimental.** Single colourless block-shaped crystals of JCS-ELN46-0036 were The crystal was chosen from the sample as supplied. A suitable crystal  $0.78 \times 0.51 \times 0.30$  mm<sup>3</sup> was selected and mounted on a loop with paratone oil on an XtaLAB Synergy, Dualflex, HyPix diffractometer. The crystal was kept at a steady  $T = 102(3)$  K during data collection. The structure was solved with the  $\varphi$  structure solution program using the None methods solution method and by using Olex2 (Dolomanov et al., 2009) as the graphical interface. The model was refined with version of olex2.refine 1.3-alpha (Bourhis et al., 2015) using Levenberg-Marquardt minimisation.

**Crystal Data.** C<sub>18</sub>H<sub>18</sub>ClNO<sub>3</sub>,  $M_r = 331.801$ , orthorhombic,  $P2_12_12_1$  (No. 19),  $a = 8.77283(16)$  Å,  $b = 12.4768(2)$  Å,  $c = 15.4124(3)$  Å,  $\alpha = \beta = \gamma = 90^\circ$ ,  $V = 1686.99(5)$  Å<sup>3</sup>,  $T = 102(3)$  K,  $Z = 4$ ,  $Z' = 1$ ,  $\mu(\text{Mo K}\alpha) = 0.240$ , 42004 reflections measured, 8753 unique ( $R_{\text{int}} = 0.0281$ ) which were used in all calculations. The final  $wR_2$  was 0.0642 (all data) and  $R_1$  was 0.0251 ( $I \geq \sigma(I)$ ).

| Compound                              | JCS-ELN46-0036                                    |
|---------------------------------------|---------------------------------------------------|
| Formula                               | C <sub>18</sub> H <sub>18</sub> ClNO <sub>3</sub> |
| $D_{\text{calc.}} / \text{g cm}^{-3}$ | 1.306                                             |
| $\mu / \text{mm}^{-1}$                | 0.240                                             |
| Formula Weight                        | 331.801                                           |
| Colour                                | colourless                                        |
| Shape                                 | block                                             |
| Size/mm <sup>3</sup>                  | $0.78 \times 0.51 \times 0.30$                    |
| $T/\text{K}$                          | 102(3)                                            |
| Crystal System                        | orthorhombic                                      |
| Flack Parameter                       | -0.04(3)                                          |
| Hooft Parameter                       | -0.008(9)                                         |
| Space Group                           | $P2_12_12_1$                                      |
| $a/\text{\AA}$                        | 8.77283(16)                                       |
| $b/\text{\AA}$                        | 12.4768(2)                                        |
| $c/\text{\AA}$                        | 15.4124(3)                                        |
| $\alpha/^\circ$                       | 90                                                |
| $\beta/^\circ$                        | 90                                                |
| $\gamma/^\circ$                       | 90                                                |
| $V/\text{\AA}^3$                      | 1686.99(5)                                        |
| $Z$                                   | 4                                                 |
| $Z'$                                  | 1                                                 |
| Wavelength/Å                          | 0.71073                                           |
| Radiation type                        | Mo K $\alpha$                                     |
| $\theta_{\text{min}}/^\circ$          | 2.10                                              |
| $\theta_{\text{max}}/^\circ$          | 38.16                                             |
| Measured Refl.                        | 42004                                             |
| Independent Refl.                     | 8753                                              |
| Reflections with $I \geq \sigma(I)$   | 8164                                              |
| $R_{\text{int}}$                      | 0.0281                                            |
| Parameters                            | 371                                               |
| Restraints                            | 78                                                |
| Largest Peak                          | 0.3291                                            |
| Deepest Hole                          | -0.2258                                           |
| GooF                                  | 1.0429                                            |
| $wR_2$ (all data)                     | 0.0642                                            |
| $wR_2$                                | 0.0632                                            |
| $R_1$ (all data)                      | 0.0281                                            |
| $R_1$                                 | 0.0251                                            |

## Structure Quality Indicators

|              |            |       |          |      |                  |       |                                      |       |       |          |
|--------------|------------|-------|----------|------|------------------|-------|--------------------------------------|-------|-------|----------|
| Reflections: | d min (Mo) | 0.58  | $\mu_a$  | 49.8 | R <sub>int</sub> | 2.81% | $\frac{I_{\sigma}}{I_{\sigma_{Cr}}}$ | 100%  |       |          |
| Refinement:  | Shift      | 0.003 | Max Peak | 0.3  | Min Peak         | -0.2  | Goof                                 | 1.043 | Flack | -0.04(3) |

**Experimental Extended.** A colourless block-shaped crystal with dimensions 0.78×0.51×0.30 mm<sup>3</sup> was mounted on a loop with paratone oil. Data were collected using an XtaLAB Synergy, Dualflex, HyPix diffractometer equipped with an Oxford Cryosystems low-temperature device operating at  $T = 102(3)$  K.

Data were measured using  $\omega$  scans of 0.5° per frame for 7.0/9.0 s using Mo K $\alpha$  radiation. The total number of runs and images was based on the strategy calculation from the program CrysAlisPro (Rigaku, V1.171.40.67a, 2019) The maximum resolution that was achieved was  $\Theta = 38.16^\circ$  (0.58 Å).

The diffraction pattern was indexed The total number of runs and images was based on the strategy calculation from the program CrysAlisPro (Rigaku, V1.171.40.67a, 2019) and the unit cell was refined using CrysAlisPro (Rigaku, V1.171.40.67a, 2019) on 28796 reflections, 69% of the observed reflections.

Data reduction, scaling and absorption corrections were performed using CrysAlisPro (Rigaku, V1.171.40.67a, 2019). The final completeness is 100.00 % out to 38.16° in  $\Theta$  A multi-scan absorption correction was performed using CrysAlisPro 1.171.40.67a (Rigaku Oxford Diffraction, 2019) using spherical harmonics as implemented in SCALE3 ABSPACK. The absorption coefficient  $\mu$  of this material is 0.240 mm<sup>-1</sup> at this wavelength ( $\lambda = 0.711\text{Å}$ ) and the minimum and maximum transmissions are 0.657 and 1.000.

The structure was solved and the space group  $P2_12_12_1$  (# 19) determined by the ? structure solution program using None methods and refined by Levenberg-Marquardt using version of olex2.refine 1.3-alpha (Bourhis et al., 2015). All non-hydrogen atoms were refined anisotropically. Hydrogen atom positions were calculated geometrically and refined using the riding model.

\_refine\_special\_details: Refinement using NoSpherA2, an implementation of NON-SPHERical Atom-form-factors in Olex2. Please cite: F. Kleemiss, H. Puschmann, O. Dolomanov, S. Grabowsky - to be published - 2020 NoSpherA2 makes use of tailor-made aspherical atomic form factors calculated on-the-fly from a Hirshfeld-partitioned electron density (ED) - not from spherical-atom form factors. The ED is calculated from a gaussian basis set single determinant SCF wavefunction - either Hartree-Fock or B3LYP - for a fragment of the crystal embedded in an electrostatic crystal field. The following options were used: SOFTWARE: Tonto METHOD: rks BASIS SET: STO-3G CHARGE: 0 MULTIPLICITY: 1 DATE: 2020-01-03\_16-47-16 CLUSTER RADIUS: 0

\_exptl\_absorpt\_process\_details: CrysAlisPro 1.171.40.67a (Rigaku Oxford Diffraction, 2019) using spherical harmonics as implemented in SCALE3 ABSPACK.

**Table 1:** Fractional Atomic Coordinates ( $\times 10^4$ ) and Equivalent Isotropic Displacement Parameters ( $\text{\AA}^2 \times 10^3$ ) for JCS-ELN46-0036.  $U_{eq}$  is defined as 1/3 of the trace of the orthogonalised  $U_{ij}$ .

| Atom | x         | y           | z           | $U_{eq}$  |
|------|-----------|-------------|-------------|-----------|
| Cl1  | 7061.2(2) | 2760.02(13) | 3319.86(12) | 31.82(4)  |
| O1   | 4349.7(6) | 4960.6(4)   | 6032.7(3)   | 24.65(9)  |
| O3   | 3521.2(6) | 3493.5(4)   | 4489.9(3)   | 23.14(9)  |
| O2   | 6826.1(6) | 4856.6(4)   | 5724.3(3)   | 25.58(9)  |
| N1   | 5528.8(9) | 3306.0(5)   | 1949.0(4)   | 29.09(12) |
| C16  | 2642.1(6) | 6306.1(5)   | 4219.7(3)   | 16.51(8)  |
| C12  | 2662.7(6) | 4378.1(5)   | 4341.0(4)   | 18.35(9)  |

| Atom | x          | y         | z         | $U_{eq}$  |
|------|------------|-----------|-----------|-----------|
| C15  | 1089.2(6)  | 6303.2(5) | 4009.3(4) | 19.83(9)  |
| C9   | 5536.8(7)  | 5017.8(4) | 5500.6(4) | 18.72(9)  |
| C11  | 3433.8(6)  | 5364.5(4) | 4387.1(3) | 14.89(8)  |
| C7   | 5088.1(6)  | 5356.5(4) | 4602.7(3) | 15.11(8)  |
| C13  | 1110.8(7)  | 4360.2(5) | 4147.1(4) | 23.25(11) |
| C14  | 346.8(6)   | 5320.7(6) | 3987.5(4) | 23.68(11) |
| C8   | 6170.1(6)  | 6166.3(4) | 4205.6(4) | 17.89(9)  |
| C4   | 4432.4(8)  | 5017.5(5) | 1668.0(4) | 25.20(11) |
| C6   | 6251.3(6)  | 5026.0(4) | 3904.9(4) | 17.33(8)  |
| C3   | 4920.4(7)  | 5378.4(5) | 2473.9(4) | 20.72(9)  |
| C2   | 5723.9(6)  | 4699.8(5) | 3030.4(4) | 17.50(8)  |
| C17  | 265.3(8)   | 7332.0(6) | 3805.8(5) | 28.40(13) |
| C5   | 4751.0(10) | 3971.2(6) | 1434.1(4) | 30.29(14) |
| C1   | 5994.1(8)  | 3670.7(5) | 2704.4(4) | 22.22(10) |
| C18  | 2874.4(10) | 2476.0(5) | 4312.0(5) | 31.48(14) |
| C10  | 4684.5(11) | 4701.7(8) | 6917.2(5) | 36.96(17) |

Table 2: Anisotropic Displacement Parameters ( $\times 10^4$ ) JCS-ELN46-0036. The anisotropic displacement factor exponent takes the form:  $-2\pi^2[h^2a^{*2} \times U_{11} + \dots + 2hka^* \times b^* \times U_{12}]$

| Atom | $U_{11}$  | $U_{22}$  | $U_{33}$  | $U_{23}$  | $U_{13}$  | $U_{12}$  |
|------|-----------|-----------|-----------|-----------|-----------|-----------|
| Cl1  | 42.08(9)  | 19.44(6)  | 33.95(8)  | 9.00(6)   | -9.06(7)  | -6.84(6)  |
| O1   | 26.3(2)   | 30.5(2)   | 17.16(16) | -4.99(19) | -2.36(15) | 3.48(17)  |
| O3   | 26.8(2)   | 15.65(17) | 27.0(2)   | -4.97(15) | -2.79(18) | 2.62(16)  |
| O2   | 26.0(2)   | 26.6(2)   | 24.2(2)   | 5.40(17)  | -7.76(17) | 0.54(17)  |
| N1   | 44.2(3)   | 19.8(2)   | 23.3(2)   | 4.7(2)    | -2.5(2)   | -8.0(2)   |
| C16  | 17.26(19) | 17.4(2)   | 14.90(19) | 0.68(16)  | 1.02(15)  | -1.62(16) |
| C12  | 19.9(2)   | 17.5(2)   | 17.6(2)   | -5.60(17) | 1.17(17)  | 0.64(17)  |
| C15  | 17.3(2)   | 26.4(2)   | 15.8(2)   | 3.40(19)  | 1.73(16)  | -2.82(19) |
| C9   | 23.2(2)   | 13.93(19) | 19.0(2)   | -0.61(17) | -3.78(17) | -0.21(17) |
| C11  | 15.57(17) | 15.15(18) | 13.96(18) | -1.94(15) | 0.81(14)  | -0.09(16) |
| C7   | 16.29(18) | 12.58(18) | 16.44(18) | -1.16(15) | -0.57(15) | -0.43(15) |
| C13  | 20.0(2)   | 27.6(3)   | 22.1(2)   | -9.1(2)   | 2.04(19)  | 0.1(2)    |
| C14  | 15.34(19) | 34.4(3)   | 21.3(2)   | -2.9(2)   | 1.98(17)  | -2.8(2)   |
| C8   | 17.7(2)   | 14.59(19) | 21.4(2)   | -3.31(16) | 0.70(17)  | -1.65(17) |
| C4   | 33.7(3)   | 23.2(2)   | 18.7(2)   | 0.8(2)    | -1.1(2)   | -1.7(2)   |
| C6   | 15.25(18) | 15.51(19) | 21.2(2)   | -0.87(16) | 0.46(16)  | -2.74(17) |
| C3   | 24.1(2)   | 18.6(2)   | 19.4(2)   | 0.57(19)  | 0.84(18)  | -1.80(18) |
| C2   | 17.19(19) | 16.21(19) | 19.1(2)   | -0.62(17) | 2.71(16)  | -2.70(17) |
| C17  | 24.7(3)   | 32.8(3)   | 27.7(3)   | 11.6(2)   | -2.7(2)   | -5.8(3)   |
| C5   | 44.8(4)   | 25.8(3)   | 20.3(2)   | 1.5(3)    | -2.8(2)   | -6.3(2)   |
| C1   | 26.7(3)   | 18.2(2)   | 21.7(2)   | 1.9(2)    | 1.1(2)    | -4.32(19) |
| C18  | 42.2(4)   | 17.3(2)   | 34.9(3)   | -9.4(3)   | 0.3(3)    | 0.4(2)    |
| C10  | 44.2(4)   | 48.0(4)   | 18.7(2)   | -10.4(4)  | -5.9(3)   | 9.6(3)    |
| H8a  | 39(6)     | 30(5)     | 40(6)     | -11(5)    | 3(5)      | -6(5)     |
| H13  | 41(6)     | 38(4)     | 48(7)     | -25(3)    | 2(5)      | 2(3)      |
| H8b  | 39(6)     | 28(5)     | 37(6)     | -11(4)    | -16(5)    | 7(5)      |
| H6   | 33(5)     | 53(6)     | 29(5)     | 7(5)      | -11(5)    | -16(5)    |
| H3   | 36(6)     | 29(3)     | 53(6)     | 0(2)      | 18(5)     | -12(2)    |
| H16  | 34(5)     | 24(3)     | 40(6)     | -8(2)     | 1(4)      | 0(3)      |
| H4   | 81(8)     | 30(5)     | 28(5)     | 17(4)     | -21(4)    | -11(3)    |
| H18a | 58(8)     | 17(5)     | 99(11)    | 9(5)      | -7(8)     | 0(6)      |
| H17a | 50(5)     | 53(6)     | 45(4)     | 14(3)     | 5(2)      | -10(2)    |
| H5   | 91(10)    | 48(7)     | 24(4)     | -1(7)     | -17(3)    | -11(3)    |
| H17b | 44(4)     | 37(4)     | 75(7)     | 17(2)     | 9(3)      | 9(3)      |
| H18b | 79(9)     | 33(6)     | 43(6)     | -1(6)     | -8(6)     | -12(5)    |
| H18c | 50(7)     | 45(7)     | 46(7)     | -20(6)    | 11(6)     | -14(6)    |
| H14  | 21(3)     | 61(7)     | 59(7)     | -7(3)     | -10(2)    | 12(7)     |
| H10a | 65(5)     | 69(5)     | 39(5)     | -21(3)    | -15(3)    | 9(3)      |
| H17c | 65(5)     | 72(7)     | 59(5)     | 19(3)     | -26(3)    | -9(3)     |
| H10b | 55(4)     | 103(8)    | 24(4)     | -12(2)    | -3(2)     | 9(3)      |
| H10c | 74(7)     | 63(4)     | 42(6)     | 0(2)      | -10(4)    | 10(2)     |

Table 3: Bond Lengths in Å for JCS-ELN46-0036.

| Atom | Atom | Length/Å   | Atom | Atom | Length/Å   |
|------|------|------------|------|------|------------|
| Cl1  | C1   | 1.7514(7)  | C15  | C17  | 1.5061(9)  |
| O1   | C9   | 1.3275(8)  | C9   | C7   | 1.4995(8)  |
| O1   | C10  | 1.4315(8)  | C11  | C7   | 1.4889(7)  |
| O3   | C12  | 1.3556(7)  | C7   | C8   | 1.5154(7)  |
| O3   | C18  | 1.4173(8)  | C7   | C6   | 1.5389(7)  |
| O2   | C9   | 1.1994(7)  | C13  | C14  | 1.3949(10) |
| N1   | C5   | 1.3358(10) | C8   | C6   | 1.4980(7)  |
| N1   | C1   | 1.3150(8)  | C4   | C3   | 1.3887(9)  |
| C16  | C15  | 1.4004(8)  | C4   | C5   | 1.3828(10) |
| C16  | C11  | 1.3890(8)  | C6   | C2   | 1.4819(8)  |
| C12  | C11  | 1.4062(7)  | C3   | C2   | 1.3963(8)  |
| C12  | C13  | 1.3941(8)  | C2   | C1   | 1.3990(8)  |
| C15  | C14  | 1.3885(9)  |      |      |            |

Table 4: Bond Angles in ° for JCS-ELN46-0036.

| Atom | Atom | Atom | Angle/°   | Atom | Atom | Atom | Angle/°   |
|------|------|------|-----------|------|------|------|-----------|
| C10  | O1   | C9   | 116.07(6) | C6   | C7   | C9   | 113.29(4) |
| C18  | O3   | C12  | 118.30(5) | C6   | C7   | C11  | 119.48(4) |
| C1   | N1   | C5   | 118.00(6) | C6   | C7   | C8   | 58.74(3)  |
| C11  | C16  | C15  | 121.82(5) | C14  | C13  | C12  | 119.56(6) |
| C11  | C12  | O3   | 115.89(5) | C13  | C14  | C15  | 121.93(5) |
| C13  | C12  | O3   | 124.46(5) | C6   | C8   | C7   | 61.42(4)  |
| C13  | C12  | C11  | 119.65(5) | C5   | C4   | C3   | 118.49(6) |
| C14  | C15  | C16  | 117.66(6) | C8   | C6   | C7   | 59.85(3)  |
| C17  | C15  | C16  | 120.85(6) | C2   | C6   | C7   | 120.15(4) |
| C17  | C15  | C14  | 121.49(5) | C2   | C6   | C8   | 121.83(5) |
| O2   | C9   | O1   | 123.59(5) | C2   | C3   | C4   | 120.56(6) |
| C7   | C9   | O1   | 112.29(5) | C3   | C2   | C6   | 123.35(5) |
| C7   | C9   | O2   | 124.06(5) | C1   | C2   | C6   | 121.73(5) |
| C12  | C11  | C16  | 119.36(5) | C1   | C2   | C3   | 114.92(5) |
| C7   | C11  | C16  | 122.31(5) | C4   | C5   | N1   | 122.34(6) |
| C7   | C11  | C12  | 118.32(5) | N1   | C1   | Cl1  | 114.89(5) |
| C11  | C7   | C9   | 117.63(4) | C2   | C1   | Cl1  | 119.44(5) |
| C8   | C7   | C9   | 113.34(4) | C2   | C1   | N1   | 125.66(6) |
| C8   | C7   | C11  | 121.06(5) |      |      |      |           |

Table 5: Torsion Angles in ° for JCS-ELN46-0036.

| Atom | Atom | Atom | Atom | Angle/°    |
|------|------|------|------|------------|
| Cl1  | C1   | N1   | C5   | -177.85(6) |
| Cl1  | C1   | C2   | C6   | -3.12(6)   |
| Cl1  | C1   | C2   | C3   | 177.29(5)  |
| O1   | C9   | C7   | C11  | -11.83(6)  |
| O1   | C9   | C7   | C8   | 137.51(5)  |
| O1   | C9   | C7   | C6   | -157.94(5) |
| O3   | C12  | C11  | C16  | 178.30(5)  |
| O3   | C12  | C11  | C7   | -0.79(6)   |
| O3   | C12  | C13  | C14  | -178.65(6) |
| O2   | C9   | C7   | C11  | 170.90(6)  |
| O2   | C9   | C7   | C8   | -39.76(7)  |
| O2   | C9   | C7   | C6   | 24.79(7)   |
| N1   | C5   | C4   | C3   | -1.07(10)  |
| N1   | C1   | C2   | C6   | 177.86(6)  |
| N1   | C1   | C2   | C3   | -1.72(8)   |
| C16  | C15  | C14  | C13  | -1.52(6)   |
| C16  | C11  | C12  | C13  | -1.41(6)   |
| C16  | C11  | C7   | C9   | 113.06(5)  |

| Atom | Atom | Atom | Atom | Angle/°    |
|------|------|------|------|------------|
| C16  | C11  | C7   | C8   | -33.80(6)  |
| C16  | C11  | C7   | C6   | -102.98(5) |
| C12  | C11  | C7   | C9   | -67.88(5)  |
| C12  | C11  | C7   | C8   | 145.26(5)  |
| C12  | C11  | C7   | C6   | 76.08(5)   |
| C12  | C13  | C14  | C15  | 0.47(7)    |
| C9   | C7   | C8   | C6   | 103.99(6)  |
| C9   | C7   | C6   | C8   | -104.08(6) |
| C9   | C7   | C6   | C2   | 144.33(4)  |
| C11  | C7   | C8   | C6   | -107.84(7) |
| C11  | C7   | C6   | C8   | 110.50(7)  |
| C11  | C7   | C6   | C2   | -1.10(6)   |
| C7   | C8   | C6   | C2   | 108.85(4)  |
| C7   | C6   | C2   | C3   | 61.56(6)   |
| C7   | C6   | C2   | C1   | -117.99(5) |
| C8   | C6   | C2   | C3   | -9.59(6)   |
| C8   | C6   | C2   | C1   | 170.86(5)  |
| C4   | C3   | C2   | C6   | -178.77(5) |
| C4   | C3   | C2   | C1   | 0.81(7)    |

**Table 6:** Hydrogen Fractional Atomic Coordinates ( $\times 10^4$ ) and Equivalent Isotropic Displacement Parameters ( $\text{\AA}^2 \times 10^3$ ) for JCS-ELN46-0036.  $U_{eq}$  is defined as 1/3 of the trace of the orthogonalised  $U_{ij}$ .

| Atom | x        | y        | z        | $U_{eq}$ |
|------|----------|----------|----------|----------|
| H8a  | 7032(13) | 6448(8)  | 4596(7)  | 36(2)    |
| H13  | 571(12)  | 3642(8)  | 4098(7)  | 42(3)    |
| H8b  | 5687(12) | 6735(8)  | 3799(7)  | 34(2)    |
| H6   | 7154(12) | 4556(9)  | 4162(6)  | 38(3)    |
| H3   | 4716(12) | 6160(8)  | 2648(7)  | 40(2)    |
| H16  | 3233(11) | 7027(7)  | 4232(7)  | 33(2)    |
| H4   | 3783(15) | 5523(8)  | 1253(7)  | 46(3)    |
| H18a | 3719(15) | 1903(8)  | 4445(10) | 58(4)    |
| H17a | -313(13) | 7637(10) | 4353(7)  | 49(3)    |
| H5   | 4428(16) | 3685(10) | 821(6)   | 54(4)    |
| H17b | 1066(14) | 7930(9)  | 3632(9)  | 52(3)    |
| H18b | 2492(14) | 2441(9)  | 3667(8)  | 52(3)    |
| H18c | 1859(13) | 2311(9)  | 4718(7)  | 47(3)    |
| H14  | -803(11) | 5263(10) | 3812(8)  | 47(3)    |
| H10a | 5475(16) | 5202(11) | 7160(7)  | 58(3)    |
| H17c | -571(16) | 7243(12) | 3330(8)  | 66(3)    |
| H10b | 3647(15) | 4719(13) | 7232(7)  | 61(3)    |
| H10c | 5258(17) | 3927(11) | 6967(8)  | 60(3)    |

#### Citations

O.V. Dolomanov and L.J. Bourhis and R.J. Gildea and J.A.K. Howard and H. Puschmann, Olex2: A complete structure solution, refinement and analysis program, *J. Appl. Cryst.*, (2009), **42**, 339-341.

## References

1. S. P. Green, K. M. Wheelhouse, A. D. Payne, J. P. Hallett, P. W. Miller and J. A. Bull, *Org. Process. Res. Dev.*, 2020, **24**, 67-84.
2. D. M. Guptill and H. M. L. Davies, *J. Am. Chem. Soc.*, 2014, **136**, 17718-17721.
3. K. M. Chepiga, C. Qin, J. S. Alford, S. Chennamadhavuni, T. M. Gregg, J. P. Olson and H. M. L. Davies, *Tetrahedron*, 2013, **69**, 5765-5771.
4. L. Fu, J. D. Mighion, E. A. Voight and H. M. L. Davies, *Chem. Eur. J.*, 2017, **23**, 3272-3275.
5. S. Harada, K. Tanikawa, H. Homma, C. Sakai, T. Ito and T. Nemoto, *Chem. Eur. J.*, 2019, **25**, 12058-12062.
6. X. B. Wang, Z. J. Zheng, J. L. Xie, X. W. Gu, Q. C. Mu, G. W. Yin, F. Ye, Z. Xu and L. W. Xu, *Angew. Chem. Int. Ed.*, 2020, **59**, 790-797.
7. L. Fu, K. Hoang, C. Tortoreto, W. Liu and H. M. L. Davies, *Org. Lett.*, 2018, **20**, 2399-2402.
8. H. M. L. Davies and R. J. Townsend, *J. Org. Chem.*, 2001, **66**, 6595-6603.
9. S. M. Nicolle and C. J. Moody, *Chem. Eur. J.*, 2014, **20**, 4420-4425.
10. P.-C. Lv, A.-Q. Jiang, W.-M. Zhang and H.-L. Zhu, *Expert. Opin. Ther. Pat.*, 2018, **28**, 139-145.
11. J. Fu, N. Wurzer, V. Lehner, O. Reiser and H. M. L. Davies, *Org. Lett.*, 2019, **21**, 6102-6106.
12. H. M. L. Davies, P. R. Bruzinski, D. H. Lake, N. Kong and M. J. Fall, *J. Am. Chem. Soc.*, 1996, **118**, 6897-6907.
13. R. P. Reddy, G. H. Lee and H. M. L. Davies, *Org. Lett.*, 2006, **8**, 3437-3440.

14. C. Qin and H. M. L. Davies, *J. Am. Chem. Soc.*, 2014, **136**, 9792-9796.
15. J. Fu, Z. Ren, J. Bacsá, D. G. Musaev and H. M. L. Davies, *Nature*, 2018, **564**, 395-399.
16. B. Wei, J. C. Sharland, P. Lin, S. M. Wilkerson-Hill, F. A. Fullilove, S. McKinnon, D. G. Blackmond and H. M. L. Davies, *ACS Catal.*, 2020, **10**, 1161-1170.
